# Supplementary material for: Different phases of aging in mouse old skeletal muscle
Source: Aging (Albany NY). 2022 Jan 11;14(1):143–60. doi: 10.18632/aging.203812 (PMC8791220; doi:10.18632/aging.203812)
Supplement: Supplementary File 1 [file aging-14-203812-s002.xlsx]

## Sheet: sigDEGs_28m_vs_24m
symbol	baseMean	log2FoldChange	lfcSE	stat	pvalue	padj	mean_WT_Muscle_28m	sd_WT_Muscle_28m	mean_WT_Muscle_24m	sd_WT_Muscle_24m	entrez	refseq
1110058L19Rik	178.435	-1.24466	0.246656	-5.04611	4.50896e-07	5.97087e-06	77.6947	38.35	188.726	37.0749	NA	NA
1500015O10Rik	20.6585	4.22333	0.757223	5.57739	2.44152e-08	4.85178e-07	9.75706	9.96713	0.907944	0.605531	NA	NA
4930523C07Rik	92.4078	1.18439	0.252991	4.68153	2.8474e-06	2.98152e-05	127.093	54.6372	51.7271	23.5828	67647	NM_001024470
A330023F24Rik	118.191	-1.16956	0.250212	-4.67428	2.94986e-06	3.06168e-05	60.105	28.168	121.609	13.1363	320977	NR_015566
AI607873	195.07	1.40833	0.224861	6.26311	3.77382e-10	1.32958e-08	214.878	66.3374	81.8833	40.9156	NA	NA
Aox3	16.2388	2.4138	0.480133	5.02736	4.97271e-07	6.52313e-06	27.2681	23.7716	6.45632	3.7091	71724	NM_023617
Casp8	71.0688	1.01809	0.213057	4.7785	1.76609e-06	1.97157e-05	81.5683	59.3643	37.9278	6.70438	12370	NM_001080126
Cdh19	38.2529	1.40002	0.279845	5.00285	5.64889e-07	7.27347e-06	42.2048	17.2385	18.1676	5.94566	227485	NM_001081386
Cfh	425.871	1.88694	0.204252	9.23829	2.50466e-20	2.40463e-17	442.201	219.9	137.269	32.903	12628	NM_009888
Cox20	113.005	-1.04601	0.181664	-5.75794	8.51471e-09	1.94635e-07	60.9712	23.3532	118.756	8.16104	66359	NM_025511
Cox5b	2948.41	-1.07816	0.143486	-7.51406	5.73197e-14	7.52554e-12	1502.7	513.172	3062.14	405.16	12859	NM_009942
Dock10	109.175	1.35748	0.296958	4.5713	4.84697e-06	4.64179e-05	136.158	105.78	38.5094	17.7819	210293	NM_001285927
Fcer1g	85.7917	1.30382	0.259133	5.03146	4.86746e-07	6.39052e-06	109.894	77.3458	33.208	11.8808	14127	NM_010185
Fcgr2b	97.9432	1.64455	0.315248	5.21668	1.82154e-07	2.70084e-06	195.508	245.244	36.7852	20.1008	14130	NM_001077189
Fcgr3	109.087	1.46034	0.262286	5.56774	2.5806e-08	5.09198e-07	128.57	87.0518	40.0907	11.3038	14131	NM_001356511
Fcgr4	10.3309	3.14686	0.680702	4.62296	3.78294e-06	3.78565e-05	63.2162	85.7183	3.21331	3.40549	246256	NM_144559
Fmod	1036.99	1.70948	0.332936	5.13457	2.82796e-07	3.97078e-06	475.131	306.735	199.457	109.705	14264	NM_021355
Gm15179	132.913	-1.27062	0.195406	-6.50245	7.90245e-11	3.45839e-09	66.0601	36.1552	164.528	23.266	100503248	NR_037976
Grem2	78.9089	1.49396	0.273662	5.45912	4.785e-08	8.50722e-07	32.2065	19.9467	15.988	6.20832	23893	NM_011825
Hsd11b1	108.852	1.07065	0.180737	5.9238	3.14577e-09	8.28854e-08	105.6	46.1027	61.1794	12.6554	15483	NM_001044751
Ifi204	96.7542	1.67638	0.210882	7.94939	1.87435e-15	4.17274e-13	104.013	43.2609	34.7953	15.1661	15951	NM_008329
Ifi205	202.958	1.29265	0.199889	6.46687	1.00052e-10	4.19916e-09	160.23	49.5363	78.874	19.1351	226695	NM_172648
Il1r1	104.677	1.20489	0.183975	6.54917	5.78568e-11	2.67692e-09	99.2797	30.6431	50.662	22.0826	16177	NM_001123382
Il1rl2	20.2483	3.60386	0.507987	7.09439	1.29923e-12	1.09057e-10	16.8343	9.19497	1.06876	1.13181	107527	NM_001356478
Ildr2	65.5634	1.93029	0.238524	8.09266	5.83757e-16	1.51985e-13	73.2562	29.1798	19.191	6.89069	100039795	NM_001164528
Inpp5d	84.0246	1.25349	0.278288	4.5043	6.65913e-06	6.07428e-05	147.766	135.021	33.9367	9.44508	16331	NM_001110192
Irf6	21.4871	3.30733	0.54811	6.03407	1.59882e-09	4.72297e-08	41.0413	64.4531	6.05323	3.766	54139	NM_016851
Kcnk2	27.4517	1.4398	0.306689	4.69465	2.67058e-06	2.81943e-05	23.3926	9.00599	9.09023	2.70092	16526	NM_001159850
2021-03-01	13.5944	2.62237	0.543332	4.82646	1.38982e-06	1.60519e-05	11.2066	8.31262	2.91122	3.34854	NA	NA
Mcm6	56.0512	1.37243	0.266305	5.1536	2.55538e-07	3.64129e-06	164.646	239.344	27.6637	7.81486	17219	NM_001313695
Mlph	10.9015	2.10866	0.45845	4.59954	4.23426e-06	4.16939e-05	15.458	10.485	5.10929	4.46582	171531	NM_053015
Mnda	33.6388	1.58489	0.291554	5.43599	5.44918e-08	9.49767e-07	31.279	7.59609	9.67241	3.78457	NA	NA
Mpc2	1349.12	-1.10832	0.173016	-6.40587	1.49515e-10	5.844e-09	599.979	260.094	1353.94	163.729	70456	NM_027430
Nme7	67.5425	-1.04142	0.221036	-4.71154	2.45849e-06	2.6317e-05	41.6913	15.4797	71.5495	21.2934	171567	NM_001293313
Pappa2	11.4373	2.83139	0.522721	5.41665	6.07274e-08	1.04227e-06	11.0423	11.1378	2.17116	1.86909	23850	NM_001085376
Pid1	110.917	1.09303	0.213673	5.11545	3.12987e-07	4.33917e-06	92.7984	36.948	51.5682	18.0966	98496	NM_001003948
Pigr	3.4049	6.35319	1.28258	4.95346	7.29055e-07	9.17953e-06	51.4042	90.3553	0	0	18703	NM_011082
Pkp1	7.44209	3.62401	0.767587	4.7213	2.34337e-06	2.52253e-05	7.29446	7.70652	1.35807	1.37325	18772	NM_001313701
Pla2g4a	25.8308	1.91925	0.341193	5.6251	1.85399e-08	3.8642e-07	30.6752	14.1926	7.85832	4.08498	18783	NM_001305632
Rgs2	83.3902	1.65723	0.251997	6.57641	4.81941e-11	2.27813e-09	93.9226	52.2355	45.5368	13.7011	19735	NM_009061
Rnasel	61.6104	1.34081	0.288567	4.64645	3.377e-06	3.43083e-05	60.7439	25.1143	20.833	10.5578	24014	NM_011882
Scarna6	7.16062	-3.30386	0.73992	-4.46515	8.00123e-06	7.08876e-05	2.59007	1.5906	18.9471	12.2567	100217415	NR_028519
Selp	23.7552	1.78347	0.36399	4.89978	9.59444e-07	1.16783e-05	19.456	9.20676	6.4389	5.11831	20344	NM_011347
Snhg6	105.707	-1.07404	0.229009	-4.68992	2.73316e-06	2.87169e-05	47.9335	15.2231	105.614	19.3071	73824	NR_024067
Soat1	44.86	1.53182	0.263843	5.80581	6.40547e-09	1.53262e-07	56.6852	35.7179	16.9478	7.20009	20652	NM_009230
Sp140	38.9425	1.89313	0.286394	6.61025	3.83675e-11	1.88898e-09	106.423	143.623	12.618	2.96763	434484	NM_001013817
Stat1	325.292	1.07199	0.229563	4.66973	3.01602e-06	3.12141e-05	464.572	314.268	180.696	22.1311	20846	NM_001205313
Sulf1	225.586	1.01564	0.185057	5.48825	4.05944e-08	7.38828e-07	190.783	57.7348	100.455	32.9449	240725	NM_001198565
Tlr5	14.2943	2.37005	0.456235	5.1948	2.04935e-07	2.97825e-06	12.3918	5.38592	2.86392	1.96483	53791	NM_016928
Tmeff2	61.0154	1.03662	0.220166	4.70836	2.49723e-06	2.65997e-05	40.4574	18.2017	25.323	7.13983	56363	NM_019790
Ugt1a7c	7.75691	2.92424	0.65299	4.47823	7.52629e-06	6.7609e-05	10.0952	7.54826	1.48396	0.834196	394432	NM_201642
Uhmk1	67.6717	1.44945	0.214917	6.74422	1.53856e-11	8.7858e-10	68.5844	26.5847	26.992	11.2379	16589	NM_001360809
1190007I07Rik	102.823	-1.028	0.197206	-5.21283	1.85979e-07	2.74694e-06	58.1718	19.4339	114.967	14.5585	544717	NM_001135567
1810014B01Rik	106.043	-1.12667	0.198617	-5.67259	1.40654e-08	3.02602e-07	48.964	22.9787	102.965	25.6049	66263	NR_015572
2310015B20Rik	311.568	-1.78342	0.209294	-8.52113	1.5801e-17	6.56e-15	112.09	55.4081	359.595	96.6128	NA	NA
Acss3	90.2101	1.42528	0.223767	6.36951	1.89628e-10	7.13941e-09	81.3645	38.5654	44.4117	13.6432	380660	NM_001142804
Arid5b	154.367	1.0342	0.205183	5.0404	4.64552e-07	6.12531e-06	183.858	70.8245	93.5113	19.8436	71371	NM_023598
Atcay	50.9707	-1.69798	0.32157	-5.28028	1.28989e-07	1.98736e-06	22.1132	17.8859	43.9003	11.6591	16467	NM_178662
Bicc1	125.079	1.13782	0.162735	6.99183	2.7132e-12	2.10042e-10	102.828	35.0707	49.8402	13.4275	83675	NM_001347189
Cfd	5429.97	1.34828	0.303993	4.43523	9.19724e-06	8.03177e-05	4884.21	2075.66	2735.24	1394.34	11537	NM_001291915
Chst11	59.0574	1.62933	0.271103	6.01	1.85528e-09	5.29721e-08	68.5429	30.2444	20.8007	6.04229	58250	NM_021439
Ctgf	346.641	1.07455	0.22234	4.8329	1.3456e-06	1.56353e-05	345.739	121.162	205.239	57.781	NA	NA
Dram1	131.52	1.10196	0.234086	4.70752	2.50755e-06	2.66564e-05	105.993	38.4137	60.1707	22.4212	71712	NM_027878
Dse	121.683	1.50166	0.196498	7.64213	2.13652e-14	3.41865e-12	89.2189	34.9501	38.6444	17.1025	212898	NM_172508
Enpp3	44.4502	2.0619	0.390026	5.28657	1.24629e-07	1.93572e-06	45.9953	38.5717	11.5759	6.35503	209558	NM_134005
Hebp2	9.49176	3.53591	0.751029	4.70809	2.50048e-06	2.65997e-05	6.11186	5.13432	0.73091	0.780644	56016	NM_019487
Igf1	348.885	1.08808	0.177229	6.13938	8.28428e-10	2.67342e-08	212.385	77.4477	114.272	35.9596	16000	NM_001111274
Itgb2	95.908	2.06565	0.328675	6.28478	3.28327e-10	1.18113e-08	170.486	164.409	24.4271	15.6156	16414	NM_008404
Kera	81.7324	4.08002	0.622524	6.554	5.60159e-11	2.61509e-09	12.6516	12.7337	1.24707	1.5365	16545	NM_008438
Lyz1	124.478	1.34303	0.296565	4.52863	5.93685e-06	5.517e-05	105.767	55.3018	37.1202	16.2343	17110	NM_013590
Lyz2	1408.49	1.34928	0.201524	6.69537	2.15125e-11	1.14741e-09	1391.06	840.867	468.079	130.476	17105	NM_017372
Man1a	294.294	1.36542	0.169888	8.03717	9.19397e-16	2.24172e-13	431.142	386.645	120.822	26.7491	17155	NM_008548
Moxd1	16.2548	2.07481	0.456708	4.54297	5.54673e-06	5.18269e-05	21.2322	12.3922	5.03733	2.84687	59012	NM_021509
Mrpl42	1435.43	-1.05182	0.153221	-6.86471	6.66276e-12	4.44985e-10	672.112	226.833	1431.46	168.869	67270	NM_001359476
Ncoa7	37.7916	1.69855	0.313265	5.42208	5.89081e-08	1.01673e-06	46.2197	29.0724	10.3006	2.26243	211329	NM_001111267
Ntn4	100.894	1.4306	0.146123	9.79043	1.23768e-22	1.9012e-19	89.6204	35.5343	40.7658	10.3672	57764	NM_021320
Oaz1	220.639	-1.11313	0.172532	-6.45174	1.10572e-10	4.56584e-09	95.8776	24.4631	217.615	35.5479	18245	NM_001301034
Perp	41.5751	1.5346	0.273291	5.61526	1.96262e-08	4.04127e-07	40.949	21.5111	21.093	7.43311	64058	NM_022032
Plagl1	52.4362	1.51982	0.341019	4.45671	8.32272e-06	7.35589e-05	36.5383	25.4954	14.6139	8.16379	22634	NM_001364643
Plekhg1	84.3278	1.17619	0.20888	5.63096	1.79209e-08	3.75046e-07	86.0719	30.9319	38.2337	13.5426	213783	NM_001033253
Ppap2c	14.2124	2.47507	0.50201	4.93033	8.2091e-07	1.02354e-05	19.2187	11.0712	3.37425	1.56751	NA	NA
Rab32	36.335	1.66543	0.334845	4.97372	6.56786e-07	8.33793e-06	36.7425	25.2935	11.7497	4.17767	67844	NM_026405
Sgpl1	233.47	1.17467	0.156806	7.49125	6.82206e-14	8.73281e-12	288.92	147.428	118.583	23.1195	20397	NM_001316673
Slc16a7	16.8519	2.75774	0.397582	6.93629	4.0252e-12	2.9561e-10	18.5283	9.78507	3.78327	2.95377	20503	NM_001358496
Slc29a3	73.9324	1.52708	0.25009	6.10614	1.02072e-09	3.22619e-08	88.1469	55.0203	21.8424	7.58758	71279	NM_023596
Sowahc	74.6648	2.13077	0.250858	8.49393	1.99764e-17	7.86816e-15	95.7716	42.8038	30.9988	11.6161	268301	NM_172939
Srgap1	22.9955	1.6178	0.294742	5.48885	4.0455e-08	7.37164e-07	20.9905	8.21156	8.42178	3.4154	117600	NM_001081037
Uqcr11	1831.82	-1.07323	0.151393	-7.089	1.35084e-12	1.11561e-10	890.552	303.505	1902.2	319.033	66594	NM_025650
Ust	48.7448	1.48974	0.250468	5.94784	2.71702e-09	7.36086e-08	45.737	12.1877	16.163	7.96086	338362	NM_177387
Vnn3	19.431	2.97378	0.424166	7.01088	2.3682e-12	1.86554e-10	26.7866	14.3108	5.19922	5.39454	26464	NM_011979
0610009L18Rik	105.388	-1.28475	0.186527	-6.88772	5.66953e-12	3.87065e-10	58.0988	22.0753	120.102	19.8017	66838	NR_038126
1810043H04Rik	139.885	-1.06299	0.21469	-4.95127	7.37313e-07	9.26072e-06	71.8147	18.1094	152.353	24.6781	NA	NA
2310065F04Rik	486.189	-1.12705	0.206424	-5.4599	4.76404e-08	8.48831e-07	162.858	69.2841	387.663	61.6082	74184	NR_038055
2810008D09Rik	31.0038	-1.40112	0.277033	-5.0576	4.24576e-07	5.65315e-06	18.5917	9.50102	40.4482	16.4878	NA	NA
Abhd15	45.2639	2.4657	0.337188	7.31254	2.62131e-13	2.77697e-11	60.5099	26.6042	15.0526	10.0109	67477	NM_026185
Acaca	987.199	1.62547	0.32592	4.98733	6.12189e-07	7.83653e-06	455.129	215.153	210.211	80.3529	107476	NM_133360
Acly	1188.16	1.46565	0.268912	5.45032	5.02799e-08	8.86739e-07	478.446	253.119	181.063	51.782	104112	NM_001199296
Acsf2	69.0285	1.1714	0.228056	5.13644	2.79986e-07	3.93492e-06	68.6075	20.8395	30.7266	13.4971	264895	NM_153807
Acyp2	898.768	-1.30845	0.171918	-7.61089	2.72215e-14	4.14009e-12	327.204	151.739	855.258	107.765	75572	NM_029344
Alox12e	5.43945	5.29822	1.08339	4.89042	1.00619e-06	1.21224e-05	9.11598	11.2187	0.568415	0.525375	11685	NM_145684
Atp5g1	3011.29	-1.22296	0.161411	-7.57665	3.54594e-14	5.23741e-12	1400.74	681.966	3117.97	287.275	11951	NM_001161419
Btnl9	46.3048	1.52673	0.29671	5.14553	2.66769e-07	3.76986e-06	53.5633	23.2795	22.5766	12.9094	237754	NM_172793
Ccl6	347.227	1.60906	0.244186	6.58949	4.41336e-11	2.13187e-09	378.764	217.647	141.405	48.5	20305	NM_009139
Ccl8	72.5333	2.93456	0.588535	4.9862	6.15772e-07	7.86928e-06	301.475	377.795	21.8523	7.21118	20307	NM_021443
Ccl9	190.06	1.66342	0.248012	6.70701	1.98646e-11	1.08206e-09	213.74	107.879	84.1374	31.8854	20308	NM_011338
Cd300a	23.6608	1.81327	0.376125	4.82092	1.429e-06	1.63842e-05	26.7478	21.451	9.03002	4.04798	217303	NM_001347654
Cd300ld	22.3285	2.2641	0.403104	5.61665	1.9469e-08	4.01427e-07	28.7791	24.1868	6.0164	3.62454	217305	NM_145437
Cd68	67.8242	1.90689	0.304349	6.26549	3.7166e-10	1.31545e-08	130.608	141.126	20.3777	7.63431	12514	NM_001291058
Chac2	107.769	-1.04741	0.163458	-6.40783	1.4761e-10	5.79908e-09	46.5142	14.0559	100.956	10.7021	68044	NM_001290667
Chd3	260.957	1.15604	0.204142	5.66293	1.48806e-08	3.18358e-07	232.365	102.15	115.459	34.1235	216848	NM_146019
Efemp1	299.469	1.00814	0.168501	5.98301	2.1905e-09	6.07368e-08	248.639	104.646	146.863	43.2843	216616	NM_146015
Gas7	356.949	1.0127	0.157195	6.44234	1.17645e-10	4.79351e-09	345.993	117.049	159.392	47.2629	14457	NM_001109657
Gm12250	20.0211	3.67677	0.682404	5.38797	7.12588e-08	1.19629e-06	66.8437	73.614	4.87418	4.30465	631323	NM_001135115
Ifi47	38.9659	2.61997	0.43527	6.01919	1.75293e-09	5.07095e-08	97.316	91.873	11.679	6.90445	15953	NM_001271676
Igfbp3	409.291	1.06941	0.157754	6.77895	1.21052e-11	7.29208e-10	345.079	120.082	199.21	27.6232	16009	NM_008343
Igfbp4	1332.9	1.05356	0.143247	7.35482	1.91189e-13	2.12815e-11	1205.24	321.36	687.7	171.629	16010	NM_010517
Krt14	20.7897	3.3508	0.600934	5.576	2.46115e-08	4.88446e-07	16.0981	9.01883	3.13523	1.90834	16664	NM_001313956
Krt17	9.17902	5.01705	0.827792	6.06076	1.35478e-09	4.09317e-08	9.56492	8.24298	0.956566	1.13259	16667	NM_010663
Krt19	42.8897	3.66916	0.745607	4.92104	8.60872e-07	1.06738e-05	52.5272	63.6996	6.6487	8.33328	16669	NM_001313963
Lgals3bp	347.676	1.02226	0.197228	5.18315	2.18174e-07	3.15571e-06	352.602	172.966	142.684	33.2335	19039	NM_011150
Mettl23	356.586	-1.17836	0.190355	-6.19034	6.00331e-10	2.01564e-08	150.621	48.024	354.432	45.4715	74319	NM_028865
Myo1d	125.458	1.03471	0.194979	5.30679	1.11572e-07	1.77418e-06	132.871	46.7871	62.0471	20.6553	338367	NM_177390
Nme2	2458.26	-1.06704	0.173202	-6.16068	7.24343e-10	2.37242e-08	1152.95	467.713	2382.14	303.901	18103	NM_001077529
Pank3	691.706	1.06182	0.179291	5.92231	3.17449e-09	8.33561e-08	593.255	175.144	345.25	77.4598	211347	NM_145962
Plekhh3	245.975	-1.03548	0.136729	-7.57326	3.63983e-14	5.32489e-12	131.915	68.5784	196.788	31.0017	217198	NM_001346769
Proca1	15.3481	1.9716	0.391307	5.0385	4.69191e-07	6.18116e-06	15.3611	7.07123	6.10069	2.2144	216974	NM_001045516
Ptges3l	306.643	-1.14831	0.130895	-8.77275	1.74358e-18	8.92772e-16	144.269	71.1702	310.244	30.6651	73635	NM_001357574
Rab34	86.7966	1.01324	0.190658	5.31443	1.06994e-07	1.7138e-06	59.2666	18.0382	38.6535	6.01597	19376	NM_001159482
Rangrf	201.234	-1.05442	0.141238	-7.46552	8.29701e-14	1.00304e-11	105.55	50.6427	207.973	21.7041	57785	NM_001285441
Sh3pxd2b	119.67	1.54527	0.212011	7.28864	3.131e-13	3.22787e-11	120.056	57.0329	48.7453	19.4968	268396	NM_177364
Slc25a10	224.968	1.2608	0.236188	5.3381	9.39237e-08	1.5219e-06	174.197	57.7153	89.2944	33.5187	27376	NM_013770
Slc36a2	148.131	1.76312	0.350192	5.03472	4.78545e-07	6.28822e-06	145.92	64.6862	59.6767	36.2147	246049	NM_153170
Slc6a4	11.9388	2.02921	0.434892	4.666	3.07115e-06	3.16829e-05	12.4277	6.3989	3.71855	1.09415	15567	NM_010484
Slit3	350.009	1.09858	0.179206	6.13025	8.77432e-10	2.82562e-08	290.625	99.3598	153.038	43.7403	20564	NM_011412
Specc1	30.5955	1.50458	0.248127	6.06374	1.32991e-09	4.02933e-08	30.1042	9.74723	11.8698	4.25555	432572	NM_001029936
Tmem106a	64.4889	1.28026	0.232734	5.50097	3.77714e-08	6.97364e-07	74.0358	35.4778	30.7181	15.2186	217203	NM_001359325
Tmem256	242.41	-1.2031	0.178862	-6.72641	1.73901e-11	9.60895e-10	114.94	41.1818	255.086	32.6095	69186	NM_026982
Top2a	25.8556	2.55644	0.56062	4.56003	5.11468e-06	4.85579e-05	175.823	334.255	6.51544	3.69755	21973	NM_011623
Uqcr10	2263.84	-1.13332	0.154391	-7.3406	2.12646e-13	2.33318e-11	1020.13	335.175	2240.95	314.069	66152	NM_001047158
Uqcrq	2844.08	-1.16279	0.161429	-7.20308	5.88669e-13	5.54757e-11	1260	428.484	2937.55	423.825	22272	NM_001326614
Wfdc17	29.1987	2.4784	0.448547	5.5254	3.2873e-08	6.18826e-07	63.2249	85.2659	6.75214	4.86113	100034251	NM_001081957
Wwc1	9.84731	4.87982	0.971784	5.0215	5.12684e-07	6.69102e-06	23.4542	48.0787	1.11314	0.740845	211652	NM_170779
2010107E04Rik	1190.37	-1.38701	0.180739	-7.67407	1.66629e-14	2.78215e-12	493.393	218.854	1241.95	236.699	NA	NA
A530016L24Rik	141.029	1.47574	0.269325	5.47939	4.26801e-08	7.71305e-07	115.986	42.4164	50.1063	20.3381	319942	NM_177039
Actn1	197.736	1.13264	0.159588	7.09729	1.2723e-12	1.07384e-10	199.069	74.1162	99.1583	18.8192	109711	NM_001346669
Adcy3	45.2442	2.01612	0.300976	6.69861	2.10411e-11	1.12618e-09	48.6881	24.8381	14.9423	7.55241	104111	NM_001159536
Agmo	53.2089	1.52738	0.209963	7.2745	3.47699e-13	3.53709e-11	51.9423	22.9863	23.5813	7.99832	319660	NM_178767
Clmn	121.841	1.6191	0.220813	7.33242	2.26026e-13	2.44506e-11	128.773	53.831	53.7363	28.4532	94040	NM_001040682
Dio2	25.1219	2.65223	0.475737	5.57498	2.47555e-08	4.9067e-07	27.3022	38.9063	6.80853	3.08508	13371	NM_010050
Evl	48.0917	1.28739	0.290546	4.43093	9.38269e-06	8.16586e-05	62.1032	52.4555	17.1716	4.60983	14026	NM_001163394
Flrt2	118.995	1.30312	0.18856	6.9109	4.81582e-12	3.40902e-10	104.472	37.4579	48.6359	15.5212	399558	NM_201518
Ifi27l2a	639.718	1.19648	0.267886	4.46638	7.95546e-06	7.0638e-05	588.454	229.686	352.473	146.504	76933	NM_001281830
Meg3	190.508	-1.18917	0.253535	-4.69035	2.72743e-06	2.87016e-05	62.2169	36.065	120.209	23.7051	17263	NM_144513
Pik3cg	35.4423	1.91976	0.391112	4.90845	9.17973e-07	1.12718e-05	78.8278	107.628	10.1396	5.25456	30955	NM_001146200
Pld4	94.48	1.06542	0.217676	4.89453	9.85418e-07	1.18908e-05	181.983	227.379	40.1419	8.0755	104759	NM_178911
Prkar2b	418.517	1.68779	0.371705	4.54066	5.6079e-06	5.23029e-05	400.815	177.374	185.025	92.9532	19088	NM_001364407
Pygl	208.77	1.91156	0.279502	6.83917	7.96549e-12	5.14109e-10	116.115	61.715	42.3353	23.1786	110095	NM_133198
Rapgef5	63.0826	1.59845	0.195065	8.19442	2.51801e-16	7.29796e-14	64.297	27.0614	21.3259	6.53212	217944	NM_001373989
Rps29	1977.07	-1.28979	0.159885	-8.06696	7.20704e-16	1.81487e-13	819.826	276.488	1619.36	205.966	20090	NM_009093
Rsad2	84.726	1.11049	0.210187	5.28338	1.26825e-07	1.96585e-06	109.747	51.1758	58.844	15.9487	58185	NM_021384
Serpina3b	8.37383	4.63391	1.01358	4.57185	4.83447e-06	4.63271e-05	8.17189	11.7071	0.563602	1.26025	271047	NM_173024
Serpina3c	67.2889	1.60137	0.283944	5.63974	1.70306e-08	3.58857e-07	57.7798	24.7586	21.9132	13.34	16625	NM_008458
Serpina3j	7.98921	6.93649	1.16655	5.94616	2.74503e-09	7.41062e-08	6.20796	7.15197	0	0	238395	NM_001101472
Serpina3n	151.326	1.48758	0.262889	5.6586	1.52615e-08	3.256e-07	159.724	60.9972	56.8458	27.6169	20716	NM_009252
Slirp	301.736	-1.28764	0.1569	-8.20676	2.27243e-16	6.71285e-14	131.119	49.0484	319.75	44.2549	380773	NM_026958
Smoc1	166.303	1.46916	0.276236	5.31849	1.04635e-07	1.68656e-06	169.284	62.2474	68.797	38.055	64075	NM_001146217
Syne3	104.146	1.11675	0.189455	5.89453	3.75744e-09	9.55104e-08	112.249	46.2823	47.2798	11.7347	212073	NM_001042699
Timm9	86.1358	-1.02595	0.197362	-5.19832	2.01102e-07	2.9391e-06	46.4541	22.607	84.2673	12.635	30056	NM_001024853
Tshr	37.4373	1.70735	0.364016	4.69031	2.72797e-06	2.87016e-05	32.3753	22.8955	13.096	5.35714	22095	NM_001113404
Acot13	639.398	-1.07238	0.150655	-7.11808	1.09443e-12	9.33208e-11	299.173	86.9682	624.396	95.1222	66834	NM_025790
Adtrp	5.96836	3.41725	0.712476	4.7963	1.61622e-06	1.82282e-05	7.61252	5.4656	1.5977	1.75729	109254	NM_001145875
Agtr1a	59.8477	1.10662	0.237668	4.65613	3.22204e-06	3.29081e-05	53.2263	27.551	30.5168	9.41706	11607	NM_177322
Akr1c18	8.06504	3.36352	0.743904	4.52144	6.14215e-06	5.67687e-05	4.53869	2.88941	0.527396	0.482868	105349	NM_001346535
Arhgef28	67.0488	1.02166	0.210427	4.85517	1.20283e-06	1.41853e-05	66.0151	15.5754	34.6746	15.9027	110596	NM_012026
Arsb	106.871	1.7841	0.218347	8.17092	3.0605e-16	8.54769e-14	99.136	51.1656	33.0769	11.9737	11881	NM_009712
Cd180	18.4499	2.89248	0.605103	4.78015	1.75168e-06	1.95691e-05	65.9554	113.305	2.1571	1.70976	17079	NM_001360519
Cmah	65.4095	2.06047	0.374944	5.49541	3.8981e-08	7.13692e-07	145.428	203.279	15.0866	5.30151	12763	NM_001111110
Cox7c	1426.32	-1.11589	0.171746	-6.49735	8.1747e-11	3.52729e-09	520.417	227.066	1184.31	131.523	12867	NM_007749
Cplx2	29.8696	1.73633	0.376282	4.61443	3.94176e-06	3.92668e-05	24.8094	13.3059	8.88032	3.82715	12890	NM_001362218
Dapk1	152.418	1.47596	0.302229	4.88357	1.04181e-06	1.24539e-05	155.38	82.6461	70.0878	51.3285	69635	NM_001285917
Dsp	32.4698	3.71376	0.67558	5.49715	3.85982e-08	7.07527e-07	52.5198	64.5746	6.97432	5.82449	109620	NM_023842
Eci3	7.42291	2.70803	0.580748	4.66301	3.11616e-06	3.20182e-05	10.1015	6.90358	2.79103	2.72039	69123	NM_026947
Emb	54.0576	2.66186	0.39483	6.7418	1.56441e-11	8.86751e-10	79.1744	54.1758	15.3637	7.91929	13723	NM_010330
F13a1	570.314	1.48664	0.265427	5.60093	2.13204e-08	4.36403e-07	432.981	204.962	156.042	66.5145	74145	NM_001166391
F2r	84.456	1.10616	0.206804	5.34882	8.85298e-08	1.4458e-06	86.8051	25.2198	40.8638	8.80864	14062	NM_010169
F2rl1	12.2148	1.78158	0.372925	4.77731	1.77655e-06	1.98038e-05	12.7392	8.07626	5.82955	2.81349	14063	NM_007974
Gcnt2	115.889	1.00458	0.181211	5.5437	2.96152e-08	5.70789e-07	128.374	46.6849	71.9897	11.0941	14538	NM_008105
Gm7120	103.395	-1.41428	0.292333	-4.83791	1.31211e-06	1.5339e-05	50.5389	27.1378	118.518	41.5428	NA	NA
Gpx8	83.2953	1.297	0.282516	4.5909	4.41347e-06	4.30994e-05	58.8595	28.2759	40.003	9.95122	69590	NM_027127
Hist1h4i	118.845	-1.1429	0.188978	-6.04779	1.46849e-09	4.38008e-08	66.417	19.5894	127.08	31.7212	NA	NA
Iqgap2	63.0418	1.6401	0.27345	5.99782	1.99983e-09	5.64694e-08	68.4393	29.0275	24.897	10.3837	544963	NM_027711
Irf4	93.7629	2.27862	0.324625	7.01923	2.231e-12	1.78492e-10	195.298	214.374	34.4769	11.4854	16364	NM_001347508
Ly86	38.6471	1.78078	0.367671	4.84339	1.2764e-06	1.49442e-05	92.9932	133.258	12.08	7.32811	17084	NM_010745
Mctp1	16.3062	2.36843	0.341927	6.92671	4.30755e-12	3.12114e-10	18.999	11.2591	6.05635	2.49673	78771	NM_001377108
Naip2	16.8325	2.71206	0.490865	5.52507	3.29359e-08	6.19252e-07	38.8707	40.5781	4.25235	4.7477	17948	NM_001126182
Ndufs4	1074.12	-1.11227	0.148802	-7.47481	7.73134e-14	9.57751e-12	489.816	191.024	1094.81	187.581	17993	NM_010887
Nln	66.9461	1.05269	0.18651	5.64414	1.66006e-08	3.51243e-07	60.8287	23.5212	29.8818	6.06214	75805	NM_029447
Ntrk2	305.923	1.44391	0.298918	4.83044	1.3623e-06	1.57934e-05	206.867	89.1708	89.9617	59.4876	18212	NM_001025074
Omd	33.4181	1.84903	0.27409	6.74606	1.5191e-11	8.70704e-10	22.9423	10.6085	7.94253	3.07902	27047	NM_001360708
Sfxn1	158.271	1.79166	0.274736	6.52137	6.96697e-11	3.11104e-09	189.624	96.6338	75.8744	38.7523	14057	NM_027324
Slc25a48	7.77352	7.16778	1.59506	4.49375	6.998e-06	6.36073e-05	26.0001	55.5365	0.168991	0.377876	328258	NM_177809
Tgfbi	605.641	1.14569	0.135132	8.4783	2.28503e-17	8.77508e-15	486.765	166.823	236.74	24.0814	21810	NM_009369
Uqcrb	2033.93	-1.14516	0.142428	-8.04027	8.96424e-16	2.22096e-13	960.974	316.791	2090.24	180.805	67530	NM_026219
6720456H20Rik	67.475	1.06992	0.198846	5.38064	7.42214e-08	1.23657e-06	61.1009	18.2064	31.17	8.31947	NA	NA
Anxa8	26.3817	3.07272	0.407617	7.53826	4.76301e-14	6.59141e-12	25.3402	13.3081	5.56671	2.85602	11752	NM_001281845
Chchd1	524.649	-1.0565	0.158385	-6.67046	2.55011e-11	1.32787e-09	239.765	75.7228	511.461	83.2791	66121	NM_025366
Chdh	57.478	2.96301	0.432416	6.85222	7.27135e-12	4.7733e-10	97.5596	116.206	16.7257	5.6977	218865	NM_001136240
Cma1	102.993	1.0931	0.203407	5.37397	7.70221e-08	1.27493e-06	92.2874	32.4276	52.0801	17.3776	17228	NM_010780
Dnase1l3	12.5265	3.4043	0.739414	4.60405	4.14349e-06	4.08787e-05	68.4919	104.302	2.51073	1.95435	13421	NM_007870
Dock5	38.4468	1.69038	0.314443	5.37577	7.62543e-08	1.26495e-06	46.9107	25.8016	17.4607	4.36576	68813	NM_177780
Dph3	483.995	-1.09157	0.16449	-6.63605	3.222e-11	1.62806e-09	230.765	65.4485	519.674	77.3848	105638	NM_001047433
Dpysl2	290.358	-1.26163	0.114794	-10.9904	4.25256e-28	2.17745e-24	205.014	125.027	351.815	24.9224	12934	NM_001378767
Dzip1	29.7444	1.59967	0.308846	5.17953	2.22449e-07	3.2115e-06	27.6441	13.8675	10.5768	1.98224	66573	NM_001360411
Epb4.9	43.5777	1.19091	0.255653	4.65829	3.18853e-06	3.26092e-05	30.8132	14.1194	19.5773	6.57338	NA	NA
Galnt15	301.918	1.0431	0.1612	6.47086	9.7448e-11	4.12369e-09	335.023	123.034	181.526	33.366	78754	NM_030166
Gdf10	94.4953	1.36449	0.238812	5.71367	1.10568e-08	2.44732e-07	75.7758	36.6997	32.8898	8.59563	14560	NM_145741
Gng2	92.0337	1.11221	0.16772	6.63138	3.32562e-11	1.67491e-09	129.387	69.5315	49.5992	13.7992	14702	NM_001038637
Gpc6	107.535	1.34946	0.19283	6.99819	2.59289e-12	2.02179e-10	77.8769	36.6925	37.7178	14.349	23888	NM_001079844
Itgbl1	97.3695	1.28131	0.227491	5.63236	1.77762e-08	3.73033e-07	60.4421	24.5741	32.5056	12.5408	223272	NM_145467
Kctd12	339.692	1.61914	0.175887	9.20559	3.39802e-20	3.07041e-17	465.185	321.118	118.31	23.6122	239217	NM_177715
Lacc1	17.1877	1.65792	0.367239	4.51456	6.34493e-06	5.82573e-05	28.7062	24.3879	6.68806	2.2116	210808	NM_172488
Mmp14	213.339	1.02537	0.21507	4.7676	1.86434e-06	2.06207e-05	162.24	55.2716	84.6905	19.3993	17387	NM_008608
Mss51	662.233	-1.41836	0.303805	-4.66868	3.03148e-06	3.13158e-05	367.81	139.188	847.07	176.537	74843	NM_029104
Scara3	165.53	1.16534	0.172317	6.76275	1.35397e-11	7.9081e-10	114.028	29.8182	51.4546	9.45615	219151	NM_172604
Tkt	1133.39	1.81532	0.341486	5.31593	1.06113e-07	1.70317e-06	660.314	326.852	267.111	96.3632	21881	NM_009388
Tmtc4	17.0122	1.44613	0.322256	4.48752	7.20569e-06	6.52633e-05	20.6596	6.97371	7.66855	1.58092	70551	NM_001360598
Wdfy4	66.9582	2.11179	0.39985	5.28147	1.28151e-07	1.9824e-06	346.284	605.416	18.6984	4.06477	545030	NM_001146022
Zfp503	400.391	-1.27945	0.203362	-6.29146	3.14493e-10	1.13669e-08	181.162	102.177	349.724	61.0349	218820	NM_145459
Adamts12	98.3532	1.79922	0.304885	5.9013	3.60638e-09	9.3097e-08	57.7157	35.2969	20.7967	16.4146	239337	NM_175501
Basp1	31.3463	1.75919	0.371252	4.73853	2.15271e-06	2.33365e-05	31.5238	20.0013	10.4761	3.56379	70350	NM_027395
C6	10.6414	3.65286	0.670149	5.45081	5.01403e-08	8.85293e-07	35.0308	32.0683	2.37468	1.93059	12274	NM_016704
Celsr1	17.7614	2.79379	0.608978	4.58767	4.48221e-06	4.36596e-05	33.2678	44.2248	5.71568	2.59538	12614	NM_009886
Col14a1	370.637	1.56459	0.203001	7.7073	1.28503e-14	2.2179e-12	248.112	93.1135	95.0279	33.5869	12818	NM_001368422
Cox14	731.877	-1.04646	0.153337	-6.82456	8.81929e-12	5.52951e-10	387.383	123.304	775	130.798	66379	NM_183256
Csf2rb	81.7061	1.83991	0.291647	6.3087	2.81393e-10	1.02186e-08	206.68	245.497	29.1411	12.1918	12983	NM_001358854
Dennd6b	104.635	-1.03131	0.168305	-6.12761	8.92087e-10	2.86082e-08	64.3132	20.7714	112.691	17.5442	69440	NM_027081
Enpp2	356	1.06687	0.182818	5.83571	5.35625e-09	1.326e-07	302.411	107.488	169.389	41.4982	18606	NM_001136077
Fbln1	183.295	1.86743	0.229452	8.13867	3.9963e-16	1.07697e-13	168.486	102.514	62.1333	22.099	14114	NM_001347088
Foxred2	29.3951	1.66881	0.359901	4.63686	3.53747e-06	3.5679e-05	32.8608	13.9853	8.40502	5.56181	239554	NM_001017983
Lima1	336.307	1.06495	0.142499	7.47339	7.81518e-14	9.60392e-12	272.131	54.8593	131.34	23.9402	65970	NM_001113545
Matn2	134.047	1.28613	0.253093	5.08167	3.74141e-07	5.06805e-06	124.591	68.1509	52.9891	22.1769	17181	NM_001358780
Nckap1l	101.626	1.98631	0.405737	4.89556	9.80279e-07	1.18556e-05	245.372	347.158	27.619	11.9279	105855	NM_153505
Ndufb9	3303.25	-1.05851	0.135184	-7.83016	4.87242e-15	9.47408e-13	1500.71	533.125	3102.61	359.672	66218	NM_001364808
Nfam1	48.1112	1.42189	0.300148	4.73731	2.16572e-06	2.3461e-05	87.196	119.348	16.4544	5.69187	74039	NM_001271411
Nov	129.462	1.19733	0.17675	6.77416	1.25134e-11	7.47928e-10	97.4497	34.2937	48.6568	18.5972	NA	NA
Prlr	33.1689	2.38636	0.510902	4.67088	2.99916e-06	3.10654e-05	40.2662	36.8105	10.2399	11.0125	19116	NM_001253781
Racgap1	16.919	1.9514	0.40624	4.80357	1.55859e-06	1.7656e-05	73.908	122.043	5.77769	2.91995	26934	NM_001253808
Sema5a	124.4	1.70885	0.306081	5.58299	2.36419e-08	4.73485e-07	130.757	94.9753	44.401	16.1456	20356	NM_009154
Sla	31.2328	2.04242	0.435133	4.69379	2.68195e-06	2.82949e-05	145.108	233.717	11.1615	3.44125	20491	NM_001029841
Slc1a3	172.73	1.69537	0.290523	5.83557	5.36061e-09	1.326e-07	205.427	90.6861	77.263	41.3858	20512	NM_148938
Slc38a1	32.0651	2.76871	0.509342	5.43586	5.45338e-08	9.49767e-07	138.762	220.796	7.40722	7.03519	105727	NM_001166456
Tatdn1	91.075	-1.04884	0.157566	-6.65656	2.80314e-11	1.4498e-09	49.1556	16.2214	97.4969	12.5092	69694	NM_001368428
1110054M08Rik	82.9205	-1.19535	0.232266	-5.14647	2.65429e-07	3.76477e-06	38.1125	11.1022	90.0606	17.2159	NA	NA
AI480653	54.4464	1.14378	0.231369	4.94351	7.67267e-07	9.60553e-06	48.7594	12.3792	21.1348	9.6292	NA	NA
Adipoq	1404.89	1.39191	0.295746	4.70643	2.52096e-06	2.67804e-05	1133.43	447.83	589.3	276.353	11450	NM_009605
Ahsg	17.6318	6.59134	1.45614	4.52657	5.99483e-06	5.56751e-05	23.5942	29.5719	0.372505	0.510105	11625	NM_001276449
Alcam	42.2669	3.56673	0.461489	7.72874	1.08619e-14	1.94011e-12	71.6705	81.7166	6.07244	2.58301	11658	NM_001331110
Carhsp1	248.945	1.11234	0.16844	6.60378	4.0081e-11	1.96078e-09	221.687	69.9792	111.228	35.8427	52502	NM_025821
Cldn1	81.072	1.71226	0.294853	5.80716	6.35409e-09	1.52508e-07	77.6757	46.648	29.3901	14.8776	12737	NM_016674
Cox17	539.476	-1.11807	0.181971	-6.14425	8.03431e-10	2.60369e-08	255.467	85.2754	571.478	91.4546	12856	NM_001017429
Cxadr	16.2627	3.1321	0.559643	5.5966	2.18595e-08	4.45928e-07	19.9234	20.1902	3.10602	1.52961	13052	NM_001025192
D16Ertd472e	43.9083	1.26942	0.270564	4.69174	2.70889e-06	2.854e-05	54.9792	26.197	16.3978	4.56852	67102	NM_001252438
Igf2bp2	11.7245	2.8912	0.573046	5.04533	4.5275e-07	5.9851e-06	9.91214	11.0968	2.11891	1.55391	319765	NM_183029
Kcnj15	20.4215	2.21661	0.464262	4.77448	1.80172e-06	2.00553e-05	24.4762	13.0503	8.95769	8.3782	16516	NM_001039056
Masp1	17.8612	1.75399	0.33906	5.17311	2.30235e-07	3.31146e-06	15.1859	5.61574	4.95811	2.89899	17174	NM_001359083
Mrap	78.5793	1.68785	0.294534	5.73056	1.00099e-08	2.24628e-07	55.9813	28.3046	28.0298	9.26413	77037	NM_029844
Ndufb4	683.328	-1.4077	0.196948	-7.1476	8.83077e-13	7.80132e-11	156.473	67.8185	450.823	74.9941	68194	NM_026610
Ostn	852.897	-1.50689	0.165815	-9.08778	1.01085e-19	7.39414e-17	329.366	206.695	861.289	122.345	239790	NM_198112
Pam16	253.713	-1.26177	0.198153	-6.36767	1.91919e-10	7.19689e-09	117.342	53.9863	266.369	54.4827	66449	NM_025571
Pigp	729.018	-1.09282	0.170228	-6.41972	1.36529e-10	5.39131e-09	344.849	126.691	734.467	54.5348	56176	NM_001159616
Ptplb	136.792	1.46529	0.286891	5.10747	3.26493e-07	4.51419e-06	130.626	58.7412	66.833	34.0633	NA	NA
Slc25a1	423.779	1.76876	0.319036	5.54406	2.95544e-08	5.70789e-07	245.151	101.454	98.9513	49.37	13358	NM_153150
Snn	91.7413	1.21828	0.270207	4.50869	6.52285e-06	5.96768e-05	125.86	123.545	36.183	7.486	20621	NM_009223
Tmem45a	20.5974	2.97279	0.480524	6.18655	6.14937e-10	2.05349e-08	10.7792	8.10927	3.02062	1.4785	56277	NM_019631
C2	108.527	2.0919	0.280725	7.45178	9.20866e-14	1.0798e-11	112.391	57.3657	28.5521	13.382	12263	NM_013484
C3	4102.55	1.72656	0.188906	9.13981	6.25628e-20	4.80514e-17	4335.47	1816	1367	341.878	12266	NM_009778
C4b	778.433	1.49878	0.307419	4.87535	1.08618e-06	1.2944e-05	900.362	435.894	315.417	143.757	12268	NM_009780
Cbs	12.7386	3.49676	0.587356	5.95338	2.62657e-09	7.16637e-08	26.985	32.8089	3.46571	1.77505	12411	NM_001271353
Cfb	209.634	1.72072	0.239184	7.19411	6.28697e-13	5.85298e-11	292.813	227.327	58.5801	24.083	14962	NM_001142706
Clic1	185.537	1.06761	0.180503	5.91462	3.3264e-09	8.67518e-08	243.956	228.771	84.716	7.52608	114584	NM_033444
Cyp1b1	72.9055	1.96105	0.289676	6.7698	1.28957e-11	7.64828e-10	122.904	55.5988	38.8357	20.6176	13078	NM_001364889
Emr1	104.762	1.8185	0.273578	6.64711	2.9891e-11	1.53564e-09	136.341	105.695	25.1993	9.57375	NA	NA
Epcam	15.1014	4.1466	0.741481	5.59232	2.24059e-08	4.54059e-07	31.0342	35.7402	3.08957	2.04948	17075	NM_008532
Ezr	86.9208	2.28202	0.43275	5.2733	1.33995e-07	2.0501e-06	273.056	366.946	26.9925	7.73936	22350	NM_009510
Ggnbp1	65.9506	-2.19334	0.214779	-10.2121	1.75044e-24	3.84121e-21	28.638	20.5633	87.27	14.4481	70772	NM_001251881
H2-T23	250.014	1.07537	0.243392	4.41827	9.9494e-06	8.60544e-05	330.134	245.529	124.262	37.6741	15040	NM_010398
Lpin2	54.1596	1.03891	0.232338	4.47152	7.76652e-06	6.93323e-05	90.3816	56.4314	33.7495	13.008	64898	NM_001164885
Man2a1	305.362	1.17192	0.131866	8.88719	6.26723e-19	3.70273e-16	381.259	189.422	151.292	29.2577	17158	NM_008549
Mnf1	1114.15	-1.25593	0.20278	-6.19356	5.88203e-10	1.99898e-08	490.084	213.979	1295.28	184.395	NA	NA
Ndufa11	1180.46	-1.15306	0.144393	-7.98552	1.39931e-15	3.20817e-13	591.269	197.302	1253.27	228.433	69875	NM_027244
Ndufv3	1107.59	-1.04175	0.143992	-7.2348	4.66199e-13	4.50395e-11	573.492	150.439	1136.56	126.048	78330	NM_001083891
Plin5	275.301	-1.3756	0.215243	-6.39093	1.6488e-10	6.316e-09	145.349	101.689	295.268	64.935	66968	NM_001077348
Psmb8	142.316	1.505	0.293426	5.12908	2.91159e-07	4.0698e-06	296.862	304.75	67.6199	12.3019	16913	NM_010724
Ptk7	20.5278	3.03707	0.609334	4.98424	6.2206e-07	7.94303e-06	29.1918	45.7967	4.8278	2.93272	71461	NM_175168
Qpct	44.1462	1.48671	0.247108	6.01645	1.78287e-09	5.12858e-08	29.273	13.0784	12.2833	6.37445	70536	NM_001316729
Rab31	118.886	1.02702	0.191822	5.35403	8.60181e-08	1.40866e-06	129.289	57.4991	53.0611	13.5563	106572	NM_133685
Rn45s	367023	-1.07972	0.165548	-6.5221	6.93315e-11	3.11104e-09	221650	110454	436757	42532.7	100861531	NR_046233
Ston1	91.6786	1.34947	0.228771	5.89877	3.66222e-09	9.3759e-08	106.684	36.05	44.2441	22.8538	77057	NM_029858
Vit	57.1011	1.16157	0.203685	5.70279	1.17864e-08	2.58063e-07	43.1907	17.3231	23.6192	6.43413	74199	NM_001197028
Adnp2	67.9417	1.02242	0.158032	6.46971	9.81929e-11	4.13244e-09	73.1619	19.4183	39.0829	7.32734	240442	NM_175028
Atp8b1	79.9515	1.32764	0.206479	6.4299	1.27686e-10	5.10953e-09	77.6551	48.0391	41.6107	7.42807	54670	NM_001001488
Ccbe1	35.7371	1.45243	0.31354	4.63236	3.61521e-06	3.63565e-05	37.0353	19.2276	17.5666	6.60022	320924	NM_178793
Cd74	1678.63	1.29608	0.262551	4.93647	7.95481e-07	9.94254e-06	2796.7	2715.24	670.729	180.113	16149	NM_001042605
Cdo1	668.166	1.6777	0.305914	5.48423	4.15283e-08	7.5493e-07	517.76	232.86	253.82	128.61	12583	NM_033037
Colec12	176.522	1.33288	0.214067	6.22646	4.77104e-10	1.65436e-08	136.475	54.5586	60.1927	20.4723	140792	NM_130449
Csf1r	440.57	1.10992	0.225842	4.91459	8.89687e-07	1.09771e-05	372.115	150.21	148.824	48.5994	12978	NM_001037859
Dpysl3	63.6622	1.2764	0.227707	5.60546	2.07702e-08	4.2654e-07	52.1598	18.8059	23.7548	3.22516	22240	NM_001136086
Dsg1a	5.51737	4.90295	1.09313	4.48524	7.28304e-06	6.57314e-05	4.08576	4.28599	0.587291	0.539306	13510	NM_010079
Gm4951	17.5904	2.89895	0.539604	5.37237	7.77082e-08	1.28352e-06	37.7142	32.5477	5.15221	1.47071	240327	NM_001033767
Ier3ip1	368.039	-1.07687	0.139461	-7.72166	1.14829e-14	2.02745e-12	184.92	65.0577	377.493	56.1456	66191	NM_025409
Lox	212.382	1.82763	0.237305	7.70159	1.3438e-14	2.29356e-12	173.667	83.4401	64.2838	36.0319	16948	NM_001286181
Mbp	898.511	1.04034	0.191821	5.42349	5.84453e-08	1.01101e-06	786.047	289.309	441.026	117.428	17196	NM_001025245
Myo5b	8.74745	2.90525	0.619448	4.69007	2.73118e-06	2.87157e-05	14.4359	12.5465	1.87901	1.0211	17919	NM_008661
Ndufa2	1426.86	-1.27047	0.181718	-6.99143	2.72107e-12	2.10042e-10	604.418	220.279	1363.15	246.083	17991	NM_010885
Pcdhgc3	185.121	1.02212	0.159552	6.40619	1.49201e-10	5.844e-09	130.245	24.1304	70.1042	12.9424	93706	NM_033581
Piezo2	32.0411	2.01608	0.298562	6.75263	1.45188e-11	8.41599e-10	32.5165	19.9714	9.91519	3.55805	667742	NM_001039485
Rnf125	36.9413	1.49736	0.261417	5.72787	1.01702e-08	2.27401e-07	35.2393	11.9301	13.9328	3.51553	67664	NM_001364973
Ticam2	10.0249	2.68456	0.597654	4.49182	7.06161e-06	6.41095e-05	21.252	30.5064	1.30737	0.874534	225471	NM_173394
Tnfaip8	75.6487	1.38589	0.23442	5.91201	3.37954e-09	8.79884e-08	103.624	100.889	30.2127	8.32962	106869	NM_001177759
Zbtb7c	19.9126	1.68647	0.36672	4.5988	4.24922e-06	4.18144e-05	17.5529	10.1204	6.29218	3.25898	207259	NM_001357506
4930506M07Rik	40.6494	1.30602	0.251842	5.1859	2.14975e-07	3.11531e-06	59.4977	31.3375	17.7301	6.03883	NA	NA
Acsl5	133.338	1.32096	0.176676	7.47673	7.61963e-14	9.56521e-12	168.71	111.027	56.8619	12.4289	433256	NM_027976
Aldh18a1	39.5683	1.67772	0.305479	5.49208	3.9722e-08	7.26392e-07	48.926	39.9862	10.5634	4.38642	56454	NM_019698
Aldh1a7	55.3952	1.48557	0.329026	4.51504	6.33046e-06	5.8194e-05	33.8966	18.6119	17.7701	10.4636	26358	NM_011921
Aldh3b2	18.5479	2.08119	0.426114	4.88413	1.03888e-06	1.24489e-05	23.0406	10.3878	6.13593	7.16756	621603	NM_001177438
Anxa1	503.533	1.10275	0.161857	6.8131	9.5515e-12	5.89239e-10	348.063	111.936	203.143	61.9017	16952	NM_010730
Apba1	40.1062	1.58781	0.306824	5.175	2.27908e-07	3.28106e-06	49.3005	20.9032	15.6244	5.53673	319924	NM_177034
Fads1	218.968	1.37832	0.141913	9.71242	2.66925e-22	3.15403e-19	196.336	63.8895	89.633	23.4285	76267	NM_146094
Fads2	34.974	1.47707	0.253636	5.82361	5.75912e-09	1.41545e-07	26.266	11.5564	12.3024	3.60534	56473	NM_019699
Gcnt1	22.7429	2.8286	0.48726	5.80512	6.4318e-09	1.53653e-07	30.828	22.8689	3.7025	0.94222	14537	NM_001136484
Gda	320.51	1.36453	0.15693	8.69516	3.46356e-18	1.71625e-15	381.234	141.699	158.484	39.0634	14544	NM_010266
Gfra1	71.9167	1.06608	0.201029	5.30312	1.13837e-07	1.80833e-06	55.4694	18.953	31.1269	10.5283	14585	NM_001285457
Ifit2	75.0611	1.35025	0.25719	5.25003	1.52076e-07	2.28799e-06	76.2796	41.1787	35.5585	16.5028	15958	NM_001355262
Itprip	26.5252	1.64192	0.339588	4.83503	1.33128e-06	1.55302e-05	37.8354	21.9657	7.92893	6.15643	414801	NM_001001738
Lgals12	113.696	1.3748	0.257444	5.34018	9.28537e-08	1.51094e-06	108.604	43.8697	54.1515	21.4156	56072	NM_001356574
Mpeg1	186.547	2.12436	0.332987	6.37971	1.77425e-10	6.76286e-09	465.044	514.228	66.4571	14.5581	17476	NM_001374668
Ms4a6c	56.1332	1.5339	0.333971	4.5929	4.3712e-06	4.27954e-05	121.34	124.683	22.864	9.8719	73656	NM_001166376
Ms4a6d	26.7808	2.26564	0.435903	5.19758	2.01896e-07	2.94523e-06	52.4176	43.0509	6.60108	4.1496	68774	NM_026835
Myof	172.957	1.40505	0.184366	7.62098	2.51766e-14	3.86738e-12	183.259	70.8045	66.098	15.5352	226101	NM_001099634
Neat1	5518.32	-1.23656	0.15484	-7.98611	1.39267e-15	3.20817e-13	2520.12	1023.67	5228.71	981.498	66961	NR_003513
Pcsk5	59.9614	1.03406	0.230296	4.49013	7.11807e-06	6.45458e-05	39.6302	19.7777	28.6747	8.83389	18552	NM_001163144
Pdzd7	54.7656	-1.10595	0.225722	-4.8996	9.60341e-07	1.16785e-05	22.7266	9.42793	40.9799	6.30688	100503041	NM_001195265
Pik3ap1	28.5521	2.48756	0.448355	5.54819	2.88646e-08	5.59128e-07	71.4312	82.9819	5.92136	3.78752	83490	NM_031376
Plce1	105	1.20404	0.206929	5.81863	5.93324e-09	1.44115e-07	89.9135	30.4021	42.1294	17.2985	74055	NM_019588
Plekhs1	6.81263	6.01103	1.25412	4.79303	1.6428e-06	1.84872e-05	21.9148	46.8344	0.372505	0.510105	226245	NM_001164263
Psat1	70.0499	1.40749	0.274257	5.13201	2.8666e-07	4.01769e-06	77.1542	58.7937	25.7486	8.19386	107272	NM_001205339
Rom1	58.9926	-1.09746	0.193991	-5.65727	1.53796e-08	3.27665e-07	36.8795	12.7384	58.2195	7.9169	19881	NM_009073
Scd1	11617.6	1.80208	0.385374	4.67618	2.92268e-06	3.03757e-05	6166.38	4111.33	3204.73	1535.68	20249	NM_009127
Scd3	6.96509	4.09578	0.851031	4.81273	1.48882e-06	1.69657e-05	8.30457	8.05961	0.922044	0.889861	30049	NM_024450
Sfrp5	227.255	1.31596	0.244259	5.38755	7.1426e-08	1.19779e-06	211.042	85.4305	93.2625	30.4716	54612	NM_018780
Unc93b1	225.414	1.18258	0.203266	5.81788	5.95985e-09	1.44399e-07	400.757	468.921	97.1405	32.125	54445	NM_001161428
Usmg5	1406.19	-1.22458	0.180925	-6.76845	1.3017e-11	7.66832e-10	559.583	240.725	1302.56	163.668	NA	NA
1500011K16Rik	706.66	-1.16718	0.206516	-5.65176	1.58815e-08	3.37422e-07	307.687	118.525	719.667	105.74	NA	NA
1700037H04Rik	89.461	1.03279	0.226999	4.54975	5.37097e-06	5.04609e-05	69.5787	25.5023	41.1589	13.9778	67326	NM_001311138
Apbb1ip	56.4268	1.384	0.25452	5.43771	5.39701e-08	9.44231e-07	82.1089	46.8149	24.2396	4.92848	54519	NM_019456
Atp5e	2970.32	-1.53485	0.236393	-6.49281	8.42478e-11	3.62502e-09	1117.27	647.031	3079.65	616.785	67126	NM_025983
Atp5g3	3050.62	-1.10164	0.147589	-7.46423	8.37862e-14	1.00304e-11	1491.18	713.553	2994.59	442.735	228033	NM_001301721
B2m	2393.89	1.03973	0.149438	6.95762	3.46076e-12	2.5558e-10	2351.81	1017.09	1156.7	250.408	12010	NM_009735
Bcas1	20.4148	1.96213	0.377084	5.20344	1.95632e-07	2.86472e-06	18.0081	10.1769	6.13366	4.10434	76960	NM_001164369
Camk1d	56.053	1.35212	0.221241	6.11154	9.86718e-10	3.13809e-08	63.866	40.5354	19.6923	2.80881	227541	NM_001290374
Ccdc3	145.976	1.1241	0.249156	4.51164	6.43282e-06	5.89234e-05	102.681	32.1288	55.507	27.5986	74186	NM_028804
Cd44	120.701	1.10007	0.159923	6.87874	6.03845e-12	4.06827e-10	201.336	204.794	54.9434	7.88228	12505	NM_001039150
Dpp4	150.463	1.44551	0.215595	6.70476	2.01744e-11	1.0912e-09	97.9366	37.9154	42.9505	20.8127	13482	NM_001159543
Ehf	10.2296	4.33433	0.910187	4.76202	1.91667e-06	2.11357e-05	30.8631	51.0148	1.98562	3.099	13661	NM_007914
Epb4.1l1	218.673	1.34008	0.156636	8.55536	1.17503e-17	5.3087e-15	191.75	69.591	96.7615	26.3931	NA	NA
Eya2	32.3216	1.18741	0.238121	4.98659	6.14547e-07	7.86016e-06	34.7595	12.6645	17.8451	1.48605	14049	NM_001271962
Fam107b	82.6542	1.85256	0.302602	6.12208	9.23592e-10	2.94954e-08	194.351	240.004	28.6972	10.9132	66540	NM_025626
Fam129b	229.701	1.12602	0.171862	6.5519	5.68086e-11	2.63637e-09	213.707	56.1101	108.8	34.8728	NA	NA
Fcna	75.1866	1.80478	0.334025	5.40314	6.54859e-08	1.11275e-06	70.8119	41.3224	22.4081	12.9963	14133	NM_007995
Frmd4a	97.7387	1.12625	0.187371	6.01078	1.84633e-09	5.28237e-08	89.6485	23.2932	41.9208	11.5292	209630	NM_001177843
Gm561	213.139	-1.30782	0.182924	-7.14952	8.7079e-13	7.77686e-11	86.6334	35.9551	223.247	39.0178	NA	NA
Gm6307	237.197	-1.52247	0.198997	-7.65072	1.99859e-14	3.266e-12	102.688	70.8881	209.915	59.5	NA	NA
Hdc	17.393	3.75251	0.574574	6.53094	6.53575e-11	2.96152e-09	42.0266	49.0802	4.11815	2.27973	15186	NM_008230
Hsd17b12	197.508	1.35439	0.203834	6.64458	3.04076e-11	1.55697e-09	184.353	72.9053	95.943	25.1339	56348	NM_019657
Immp1l	426.197	-1.06692	0.165875	-6.4321	1.25856e-10	5.08757e-09	181.068	49.52	400.619	50.3477	66541	NM_028260
Itga8	42.771	1.31325	0.242504	5.41535	6.11686e-08	1.0475e-06	41.4725	14.3015	18.331	6.61288	241226	NM_001001309
Itih2	13.1992	3.97545	0.622186	6.38949	1.66437e-10	6.3598e-09	16.0439	10.325	1.40519	0.968569	16425	NM_010582
Lime1	90.5227	-1.12778	0.213606	-5.27971	1.29385e-07	1.99147e-06	54.3049	18.9998	87.0307	7.61121	72699	NM_023684
Meis2	27.5163	1.87704	0.388267	4.83442	1.33536e-06	1.55516e-05	31.3431	29.6903	9.79759	4.07294	17536	NM_001136072
Mertk	81.9491	1.39252	0.216097	6.44397	1.16387e-10	4.75483e-09	114.872	36.6508	42.4469	11.1021	17289	NM_008587
Mkks	415.817	-1.00018	0.137705	-7.26321	3.77997e-13	3.82001e-11	189.274	79.8812	384.378	31.1585	59030	NM_001141946
Mrc1	401.477	1.50202	0.197026	7.62343	2.47021e-14	3.83282e-12	356.378	173.49	113.645	32.8509	17533	NM_008625
Pamr1	105.265	1.1731	0.192325	6.09956	1.06362e-09	3.34116e-08	81.3237	34.1026	42.0866	8.77616	210622	NM_173749
Pck1	1327.35	1.86216	0.416278	4.47334	7.70058e-06	6.88712e-05	1548.68	674.377	661.17	394.85	18534	NM_011044
Pde1a	53.1764	1.86117	0.243815	7.63353	2.28408e-14	3.61709e-12	53.6018	32.1287	21.7924	9.50581	18573	NM_001009978
Plcb1	61.399	1.61188	0.225953	7.13372	9.76914e-13	8.52635e-11	56.6833	23.3771	21.622	8.23232	18795	NM_001145830
Prr5l	17.0667	1.5425	0.337896	4.56501	4.99464e-06	4.75652e-05	19.9309	7.98662	7.38623	2.13851	72446	NM_001083810
Ptgis	53.134	1.83412	0.260919	7.02945	2.07342e-12	1.66753e-10	41.5374	24.3367	15.7347	4.42625	19223	NM_008968
Ptprj	133.528	1.39897	0.200229	6.98686	2.8111e-12	2.15906e-10	216.911	189.638	53.4968	11.2501	19271	NM_001135657
Pygb	241.241	1.27371	0.199205	6.39397	1.61634e-10	6.23834e-09	233.245	81.641	98.5084	33.7137	110078	NM_153781
Rassf2	159.623	1.39623	0.20398	6.8449	7.65294e-12	4.9602e-10	173.187	111.098	55.5186	10.4001	215653	NM_001362866
Rcn1	130.341	1.01562	0.208262	4.87662	1.07918e-06	1.28706e-05	104.964	36.3331	55.5455	18.0806	19672	NM_009037
Rnf24	43.8301	1.45177	0.269266	5.39159	6.98385e-08	1.17502e-06	45.2956	26.8054	19.3219	7.64103	51902	NM_178607
Romo1	714.895	-1.0394	0.17384	-5.9791	2.24379e-09	6.21026e-08	386.765	119.487	770.2	99.8845	67067	NM_001164216
Sfpi1	42.5875	1.40821	0.285109	4.93918	7.845e-07	9.81328e-06	77.0137	87.9755	17.9017	3.9525	NA	NA
Siglec1	88.8626	2.35063	0.493704	4.76121	1.9244e-06	2.12056e-05	87.6298	47.3415	16.4493	10.4081	20612	NM_011426
Slc24a3	63.3049	1.60073	0.277134	5.77602	7.64889e-09	1.78022e-07	61.4694	34.9211	23.0178	6.57952	94249	NM_001356497
Slc27a2	4.82208	6.15811	1.25153	4.92046	8.63411e-07	1.06958e-05	11.4151	21.795	0.187867	0.420084	26458	NM_011978
Snord17	43.3045	-1.99045	0.30146	-6.60269	4.03768e-11	1.96898e-09	29.7424	19.1059	89.1111	31.9211	100313519	NR_030762
St8sia6	19.0168	2.00953	0.326648	6.15199	7.65157e-10	2.49017e-08	61.5017	78.7523	6.08287	3.46449	241230	NM_145838
Stk39	47.7531	1.1778	0.218129	5.39954	6.68113e-08	1.13027e-06	43.8956	14.3341	22.1243	3.06671	53416	NM_016866
Sulf2	284.619	1.52093	0.186117	8.1719	3.03569e-16	8.54769e-14	270.056	117.616	106.956	33.6385	72043	NM_001252578
Tmem141	88.0489	-1.31167	0.184075	-7.12576	1.0351e-12	8.88279e-11	44.1126	16.3921	103.739	16.0966	51875	NM_001040130
Tor4a	53.5595	1.51418	0.331011	4.57439	4.77599e-06	4.59674e-05	82.4297	46.6195	19.9219	10.3966	227612	NM_146115
Tspan18	55.1811	1.32193	0.259667	5.09085	3.56453e-07	4.85415e-06	42.558	18.8573	19.209	7.53496	241556	NM_183180
Usp6nl	63.0727	1.28027	0.250706	5.10666	3.27904e-07	4.52377e-06	77.9339	29.2037	28.5397	11.7208	98910	NM_001080548
Vav2	37.0419	1.62857	0.279897	5.81847	5.93874e-09	1.44115e-07	50.5138	40.8723	12.2837	3.38534	22325	NM_009500
Zbp1	25.5307	3.08599	0.551879	5.5918	2.24727e-08	4.54814e-07	56.8704	59.768	4.91652	2.35281	58203	NM_001139519
1700113A16Rik	75.0278	-1.01462	0.16705	-6.07373	1.24974e-09	3.84189e-08	53.8207	24.8897	84.0119	14.3289	76642	NR_045997
Bche	182.601	1.09399	0.195289	5.60193	2.1198e-08	4.34742e-07	136.871	64.56	83.1039	21.3445	12038	NM_009738
Car13	21.7733	1.65345	0.295663	5.59233	2.2404e-08	4.54059e-07	23.0144	8.56987	9.82061	4.11071	71934	NM_024495
Cks1b	24.1042	1.35034	0.303029	4.45613	8.34532e-06	7.36592e-05	40.1451	51.8689	9.3498	2.7771	54124	NM_016904
Clca2	10.355	4.18769	0.839127	4.99054	6.02118e-07	7.72047e-06	10.9908	15.1315	1.9099	2.69344	229933	NM_178697
Cp	336.423	1.46968	0.150858	9.74216	1.99268e-22	2.55079e-19	396.062	146.639	161.94	51.304	12870	NM_001042611
Ctss	225.727	1.83244	0.34935	5.2453	1.56028e-07	2.34287e-06	486.666	550.766	83.0289	27.3762	13040	NM_001267695
Cttnbp2nl	141.585	1.05014	0.189659	5.537	3.07696e-08	5.90078e-07	144.549	21.1116	62.5227	10.0594	80281	NM_001163332
Dclk1	53.1977	1.45767	0.265044	5.49972	3.80392e-08	7.00623e-07	52.591	15.1368	18.6666	6.03186	13175	NM_001111051
Dnajc19	368.337	-1.02414	0.141645	-7.23031	4.81906e-13	4.6266e-11	180.831	42.9637	367.578	32.7079	67713	NM_001026211
Dpyd	48.3096	1.55596	0.273202	5.69527	1.23176e-08	2.68383e-07	56.5542	27.4586	27.6903	13.3541	99586	NM_170778
Eif5a2	23.1011	1.4939	0.317829	4.70032	2.59754e-06	2.74988e-05	24.1807	7.94115	8.96328	3.72551	208691	NM_177586
Enpep	123.66	1.25031	0.194617	6.42445	1.32343e-10	5.25302e-09	80.4862	29.7249	41.4832	17.3075	13809	NM_007934
Fcrl5	2.21349	5.76499	1.2142	4.74799	2.05453e-06	2.24304e-05	77.6569	158.311	0	0	329693	NM_001113238
Gbp2	183.702	1.73248	0.342555	5.05754	4.24695e-07	5.65315e-06	365.787	292.046	81.7976	18.6417	14469	NM_010260
Gbp3	95.0183	1.64721	0.353721	4.65681	3.21146e-06	3.28219e-05	182.558	161.068	46.1986	12.1239	55932	NM_001289492
Gbp7	209.847	1.64019	0.36693	4.47002	7.82117e-06	6.96929e-05	280.985	212.085	87.5055	33.2213	229900	NM_001083312
Gm15417	155.363	-1.3184	0.184119	-7.16061	8.03203e-13	7.34405e-11	73.4137	23.875	179.336	25.7647	545539	NR_040403
Gng5	932.933	-1.09348	0.134218	-8.14706	3.72877e-16	1.02281e-13	395.8	141.07	811.899	66.1166	14707	NM_010318
Gpsm2	25.6852	1.44667	0.323533	4.47149	7.76778e-06	6.93323e-05	17.8059	9.88084	8.06025	3.78574	76123	NM_029522
Hmgcs2	68.4749	1.63035	0.338135	4.82159	1.42416e-06	1.63502e-05	97.4651	54.8893	38.9447	20.0478	15360	NM_008256
Igsf10	68.2959	1.5978	0.33128	4.82312	1.4133e-06	1.62828e-05	39.3888	18.9114	14.8793	11.3965	242050	NM_001162884
Magi3	68.0021	1.34061	0.199777	6.71055	1.93897e-11	1.05995e-09	60.0898	18.4629	23.8738	4.95288	99470	NM_001159354
Mme	130.255	1.96708	0.189153	10.3994	2.49478e-25	7.66445e-22	118.768	57.2359	35.2531	12.0372	17380	NM_001289462
Mov10	23.7299	1.6529	0.362052	4.56538	4.98579e-06	4.7541e-05	28.6381	15.9224	7.17387	3.70801	17454	NM_001163440
Nbea	62.7099	1.27013	0.285951	4.44179	8.92147e-06	7.81315e-05	60.4253	36.1949	29.0569	11.7793	26422	NM_030595
Ndufb5	1750.25	-1.25041	0.138384	-9.03582	1.62774e-19	1.08712e-16	828.722	363.244	1867.48	189.625	66046	NM_025316
Ndufc1	1162.77	-1.10208	0.161377	-6.82923	8.53725e-12	5.44152e-10	494.036	187.13	1119.85	90.27	66377	NM_025523
Negr1	37.7273	2.61946	0.318704	8.2191	2.05031e-16	6.17546e-14	39.6252	24.8973	10.167	4.86121	320840	NM_001039094
Pag1	71.212	1.12293	0.251275	4.46893	7.8611e-06	6.98406e-05	64.3921	22.2626	28.7409	13.1596	94212	NM_001195031
Pde5a	58.2758	1.46229	0.285108	5.1289	2.91438e-07	4.0698e-06	65.7162	43.6297	24.8465	8.46879	242202	NM_153422
Pdgfc	32.9734	2.18491	0.308913	7.07289	1.51743e-12	1.23986e-10	40.7192	25.3786	10.164	3.23976	54635	NM_001357746
Phgdh	139.749	1.1502	0.23839	4.82485	1.40108e-06	1.61664e-05	182.882	201.493	54.4104	23.9769	236539	NM_016966
Postn	506.263	2.43281	0.359681	6.76379	1.34424e-11	7.88122e-10	305.684	194.324	63.8941	34.3501	50706	NM_001198765
Prkci	101.271	1.16171	0.206676	5.62093	1.89933e-08	3.93732e-07	98.3569	34.0111	48.0323	12.3453	18759	NM_008857
Ptger3	36.6057	1.69029	0.334239	5.05714	4.25591e-07	5.65527e-06	15.2842	8.33129	5.90659	4.60474	19218	NM_001359745
Ptgfr	37.0437	1.15476	0.226607	5.09587	3.47138e-07	4.75681e-06	31.1308	13.1402	18.3865	7.44467	19220	NM_008966
Sec24d	141.849	1.05745	0.212798	4.96924	6.72153e-07	8.50489e-06	141.644	46.6271	60.3907	21.4405	69608	NM_027135
Sema4a	79.0388	1.26824	0.196554	6.45237	1.10113e-10	4.55917e-09	74.0955	29.3117	33.4717	4.6127	20351	NM_001163489
Sfrp2	94.36	1.68097	0.251698	6.67852	2.41374e-11	1.26544e-09	51.9138	30.4028	18.137	3.24521	20319	NM_009144
Sgms2	39.8082	3.03393	0.434282	6.98609	2.82662e-12	2.16018e-10	50.0267	61.7793	9.27447	2.53692	74442	NM_001379582
Slc25a24	68.7895	1.20512	0.214456	5.61941	1.91607e-08	3.96668e-07	61.2841	22.833	34.5159	9.04612	229731	NM_172685
Slc44a3	11.2673	2.5546	0.521113	4.90221	9.47655e-07	1.15715e-05	12.7217	9.45978	3.09011	2.64717	213603	NM_145394
Syde2	37.9091	1.20507	0.249919	4.82185	1.42234e-06	1.63415e-05	43.4572	10.0996	18.4424	4.96281	214804	NM_001166064
Vcam1	110.013	1.88964	0.397076	4.75888	1.9467e-06	2.14206e-05	230.308	208.073	39.3379	27.2262	22329	NM_011693
Zfp704	168.174	1.06322	0.231822	4.58638	4.50995e-06	4.38187e-05	163.248	99.7841	91.5567	15.6918	170753	NM_133218
2010003O02Rik	98.8717	-1.78703	0.246451	-7.25105	4.13539e-13	4.09831e-11	42.1124	15.1222	114.22	27.1877	NA	NA
Acer2	125.532	1.17721	0.220978	5.32727	9.96983e-08	1.60868e-06	161.435	85.7441	84.6342	25.2731	230379	NM_001290541
C1qa	316.949	1.09374	0.203895	5.36425	8.1285e-08	1.33685e-06	408.081	279.731	138.17	29.4402	12259	NM_007572
C1qb	346.911	1.30779	0.22016	5.94016	2.84746e-09	7.60692e-08	424.104	287.314	130.631	38.946	12260	NM_009777
C1qc	327.819	1.22389	0.221689	5.52073	3.37596e-08	6.32416e-07	400.252	235.291	135.64	51.1687	12262	NM_007574
Coro2a	24.405	2.71152	0.603089	4.49605	6.92264e-06	6.30342e-05	46.957	41.3368	7.92411	6.25765	107684	NM_001164804
D4Wsu53e	1971.02	-1.03198	0.124356	-8.29854	1.05402e-16	3.59795e-14	988.22	230.424	1876.24	159.5	NA	NA
Dhcr24	114.078	1.21841	0.241464	5.04593	4.51319e-07	5.97132e-06	97.9359	36.7785	42.0638	11.9697	74754	NM_053272
Fabp3	2556.16	-1.48718	0.111416	-13.3479	1.21758e-40	1.87032e-36	1102.57	658.603	2402.93	362.999	14077	NM_010174
Fam213b	634.427	-1.01303	0.182068	-5.56399	2.6367e-08	5.18333e-07	298.217	146.495	580.634	93.8738	NA	NA
Fblim1	32.3508	1.38361	0.301641	4.58695	4.49762e-06	4.37542e-05	36.5859	15.2854	15.3031	8.00917	74202	NM_001163256
Laptm5	248.31	1.58978	0.319764	4.97175	6.63519e-07	8.41644e-06	411.714	369.579	93.5491	33.3913	16792	NM_010686
Lepr	89.0847	1.70344	0.2471	6.89373	5.43486e-12	3.72701e-10	102.646	41.6201	33.3698	11.451	16847	NM_001122899
Lyn	149.893	1.11459	0.193769	5.75215	8.81132e-09	2.0052e-07	290.885	346.937	65.4817	14.9543	17096	NM_001111096
Megf9	65.8914	1.47486	0.216049	6.82651	8.70064e-12	5.50002e-10	62.5077	23.8438	24.1903	10.2104	230316	NM_172694
Ndufb6	782.378	-1.06802	0.176747	-6.04263	1.51626e-09	4.49639e-08	392.6	173.949	890.54	157.848	230075	NM_001033305
Nipsnap3b	28.5442	1.43184	0.316554	4.52321	6.09089e-06	5.63705e-05	37.0828	25.5252	11.7589	5.88109	66536	NM_001347099
Nudt2	121.734	-1.01455	0.132593	-7.65156	1.98548e-14	3.266e-12	69.5095	17.5731	132.374	11.9526	66401	NM_025539
Pla2g2d	51.9819	2.06283	0.434362	4.74911	2.04309e-06	2.23373e-05	97.5155	93.1631	11.0759	5.02096	18782	NM_001347230
Ptafr	33.6478	2.02583	0.398677	5.08139	3.74692e-07	5.07105e-06	30.5977	21.4956	7.91233	6.07889	19204	NM_001081211
Ptbp3	346.339	1.1893	0.148581	8.0044	1.20049e-15	2.83704e-13	436.062	206.954	180.656	33.1179	230257	NM_144904
Ptplad2	30.564	1.43453	0.298183	4.81089	1.50258e-06	1.70971e-05	27.3671	15.3465	11.6967	3.34823	NA	NA
Ptprf	118.346	1.47272	0.265186	5.55355	2.79931e-08	5.45689e-07	128.375	72.5408	48.8366	15.9084	19268	NM_011213
Reck	92.4635	1.34577	0.209609	6.42038	1.35934e-10	5.38165e-09	70.2035	31.0472	32.7054	12.8778	53614	NM_016678
Slc25a34	178.885	-1.08982	0.18002	-6.05387	1.41408e-09	4.24252e-08	119.931	59.1999	198.337	33.729	384071	NM_001013780
Susd1	16.49	2.45764	0.422323	5.81933	5.90849e-09	1.44115e-07	43.704	52.2884	4.22207	3.46962	634731	NM_001163288
Svep1	351.556	1.04831	0.211734	4.95109	7.37993e-07	9.2617e-06	276.345	90.1283	150.804	60.3342	64817	NM_022814
Tmeff1	16.8928	1.55569	0.340811	4.56466	5.00297e-06	4.7615e-05	19.4005	9.36507	6.33922	2.61001	230157	NM_001356272
Tnc	115.149	1.70415	0.300603	5.66911	1.43538e-08	3.08375e-07	70.314	27.7438	21.3969	13.8951	21923	NM_001369211
Tnfrsf1b	116.461	1.22824	0.193336	6.35286	2.11345e-10	7.84172e-09	129.771	69.8075	44.913	13.0969	21938	NM_011610
Trim14	12.3609	1.98111	0.386146	5.13047	2.8902e-07	4.04707e-06	20.5183	12.8525	5.12489	1.38485	74735	NM_029077
Ttc39b	86.4724	1.30865	0.177782	7.36102	1.82505e-13	2.04632e-11	98.4875	26.058	37.1573	8.07591	69863	NM_025782
Ubxn2b	27.7732	1.67104	0.302989	5.51517	3.48445e-08	6.4957e-07	36.1429	16.7364	10.2485	2.42613	68053	NM_026534
Uqcrh	2045.6	-1.1169	0.149264	-7.48272	7.28015e-14	9.24218e-12	909.327	266.89	1989.47	279.926	66576	NM_025641
1810013D10Rik	349.906	-1.04117	0.142846	-7.28874	3.1287e-13	3.22787e-11	200.014	71.6909	362.183	50.1806	NA	NA
Aacs	203.607	1.15861	0.218891	5.29309	1.20268e-07	1.88706e-06	148.928	50.2598	77.92	24.8901	78894	NM_030210
Alb	163.929	7.30663	0.869407	8.40415	4.30986e-17	1.57628e-14	241.72	285.455	1.98939	1.61351	11657	NM_009654
Arap2	42.2661	1.674	0.302745	5.52942	3.21287e-08	6.08543e-07	60.3788	46.6635	15.818	7.28501	212285	NM_178407
Atp5j2	2491.23	-1.07212	0.164828	-6.50451	7.79474e-11	3.421e-09	1183.08	444.889	2476	279.53	57423	NM_020582
Atp5k	1541.44	-1.23128	0.178188	-6.90996	4.84774e-12	3.41588e-10	606.671	236.938	1387.19	180.948	11958	NM_007507
Cdk14	98.2892	1.21225	0.20947	5.78723	7.15559e-09	1.68069e-07	104.255	38.1794	45.1801	16.861	18647	NM_001310448
Cldn3	13.2636	5.98653	0.93062	6.43284	1.25243e-10	5.07613e-09	36.3955	63.6437	0.92682	0.0922068	12739	NM_009902
Cxcl9	40.779	2.95966	0.346586	8.53945	1.34857e-17	5.75427e-15	148.267	164.77	11.0631	6.96454	17329	NM_008599
Dok7	104.356	-1.18658	0.188951	-6.27984	3.38914e-10	1.21071e-08	68.2874	47.2995	108.208	22.1555	231134	NM_001348274
Dtx1	15.5352	2.82344	0.607901	4.64458	3.40777e-06	3.45751e-05	41.4216	55.1123	3.14058	1.75115	14357	NM_008052
Fgfbp1	139.277	-1.02342	0.193374	-5.29243	1.20699e-07	1.89189e-06	73.3927	40.0997	144.784	10.297	14181	NM_001271616
Fgl2	278.245	1.8122	0.185992	9.74344	1.96777e-22	2.55079e-19	292.454	136.828	79.9301	24.2641	14190	NM_008013
Fzd1	88.5089	1.50752	0.231405	6.51463	7.28674e-11	3.24439e-09	88.333	34.9452	35.3634	17.5287	14362	NM_021457
Hpd	5.80084	5.26193	1.15257	4.56538	4.98591e-06	4.7541e-05	7.85377	9.18756	0.375735	0.840168	15445	NM_008277
Hpse	26.5002	2.27827	0.429757	5.3013	1.14979e-07	1.82082e-06	56.6749	64.8669	7.75162	6.78448	15442	NM_152803
Kcnk3	39.8739	2.66741	0.428847	6.21996	4.97272e-10	1.7204e-08	36.2089	35.6074	8.32116	5.25833	16527	NM_010608
Kit	48.2235	1.99674	0.261104	7.64729	2.05258e-14	3.31891e-12	50.7385	26.7569	17.0073	6.58786	16590	NM_001122733
Klb	18.3399	2.3221	0.446007	5.20642	1.92519e-07	2.82722e-06	16.9353	13.0879	5.51187	4.4226	83379	NM_031180
Lphn3	8.05343	2.87347	0.626471	4.58676	4.50174e-06	4.37666e-05	11.6822	12.4355	2.26999	2.13226	NA	NA
Lrrc8b	27.5238	1.47177	0.277	5.31324	1.07693e-07	1.72141e-06	32.6489	15.0812	13.5386	3.85293	433926	NM_001033550
Lrrc8d	78.402	1.00351	0.180264	5.56692	2.59288e-08	5.10632e-07	79.9553	19.6914	38.7098	4.48662	231549	NM_001122768
Mrpl33	485.459	-1.00395	0.208304	-4.81965	1.4381e-06	1.64733e-05	214.182	63.3194	492.715	102.032	66845	NM_025796
Naaa	156.433	1.00184	0.180965	5.53609	3.09307e-08	5.91912e-07	161.861	69.2829	66.6119	7.80496	67111	NM_001163687
Nat8l	95.3416	1.83111	0.338987	5.40172	6.60057e-08	1.11911e-06	79.6925	44.7881	31.1623	17.66	269642	NM_001001985
Ncf1	65.92	1.86655	0.307049	6.079	1.20933e-09	3.73773e-08	152.28	211.503	21.2575	11.8962	17969	NM_001286037
P2rx4	85.4272	1.07171	0.221233	4.84424	1.27098e-06	1.48921e-05	99.5175	60.6257	44.2358	15.6676	18438	NM_001310718
P2rx7	50.6296	1.21372	0.26348	4.60648	4.09541e-06	4.04823e-05	58.3462	27.8186	21.5348	5.5016	18439	NM_001038839
Pcdh7	90.4612	1.30769	0.214755	6.08923	1.13453e-09	3.535e-08	78.9913	37.8754	35.1627	13.6235	54216	NM_001122758
Plac8	51.307	2.35587	0.525121	4.48633	7.24618e-06	6.55142e-05	202.752	331.178	13.7526	8.60591	231507	NM_001370754
Por	514.559	1.08513	0.139378	7.78552	6.94296e-15	1.30062e-12	457.436	116.576	265.69	45.1078	18984	NM_008898
Psapl1	6.77339	3.90898	0.884856	4.41765	9.97811e-06	8.62542e-05	6.12092	8.11846	1.31342	1.05377	76943	NM_175249
Ptpn13	85.2873	1.22521	0.220789	5.54923	2.86929e-08	5.56504e-07	79.9481	35.8192	34.259	3.71171	19249	NM_011204
Selplg	63.1772	1.71756	0.355472	4.83176	1.35331e-06	1.5701e-05	110.882	129.74	18.5351	5.67529	20345	NM_009151
Sema3a	25.464	2.5367	0.459797	5.517	3.44841e-08	6.44416e-07	20.5103	16.2329	4.68518	4.76546	20346	NM_001243072
Sema3d	35.5205	2.30363	0.313533	7.34734	2.02194e-13	2.23447e-11	28.0845	16.1188	8.09542	6.66484	108151	NM_028882
Sh2b2	56.9155	1.44602	0.219636	6.58372	4.58819e-11	2.19561e-09	67.0448	21.5234	26.033	6.85158	23921	NM_001302938
Slc7a1	51.0572	1.30133	0.276659	4.70373	2.55453e-06	2.70922e-05	104.609	111.215	22.608	9.16983	11987	NM_001301424
Srd5a3	40.6945	1.61787	0.244595	6.61448	3.7286e-11	1.85054e-09	46.3996	15.0933	12.3214	3.95316	57357	NM_020611
Tbc1d1	1050.61	-1.05627	0.165719	-6.37391	1.8427e-10	6.97186e-09	582.904	260.359	1025.11	156.178	57915	NM_001289514
Tmem60	115.818	-1.12294	0.162155	-6.92511	4.35635e-12	3.14168e-10	69.0322	20.5351	136.184	18.8559	212090	NM_177601
Ubc	2427.42	-1.0808	0.172133	-6.27885	3.41083e-10	1.21563e-08	534.676	235.283	1068.06	231.567	22190	NM_019639
Ugdh	144.528	1.19674	0.179143	6.68033	2.38401e-11	1.25612e-09	139.382	58.5387	67.3209	21.2516	22235	NM_009466
1110001J03Rik	331.033	-1.27181	0.174534	-7.2869	3.17162e-13	3.24795e-11	167.389	74.8757	380.404	76.985	NA	NA
1600020E01Rik	23.8147	-1.33324	0.289367	-4.60745	4.07646e-06	4.03225e-05	13.8395	5.85238	29.1529	7.32153	72012	NR_037960
1810044D09Rik	19.9777	-1.25656	0.27577	-4.55657	5.19956e-06	4.9151e-05	13.61	5.23798	24.7957	5.52244	69798	NR_038153
2210408F21Rik	234.466	-1.17049	0.165044	-7.09199	1.32199e-12	1.09768e-10	113.054	31.1353	251.745	45.9576	73652	NR_040257
2310001H17Rik	141.455	-1.35906	0.185712	-7.3181	2.51509e-13	2.68294e-11	64.7397	30.8437	166.026	29.3622	76432	NR_040265
2310040G24Rik	757.948	-1.31222	0.1584	-8.28418	1.18928e-16	3.88691e-14	257.253	96.355	657.356	113.059	381792	NR_040292
2410066E13Rik	72.8005	1.18066	0.187964	6.28128	3.35786e-10	1.20514e-08	57.2531	19.9424	31.3184	7.61861	NA	NA
Acn9	61.6086	-1.36537	0.205654	-6.63914	3.15525e-11	1.61023e-09	27.9733	9.19683	68.0052	6.33772	NA	NA
Actg2	17.7715	3.25696	0.663579	4.90818	9.19276e-07	1.12775e-05	31.8746	44.7387	3.61481	3.4679	11468	NM_009610
Adcyap1r1	69.0818	1.40396	0.236249	5.94272	2.80324e-09	7.51902e-08	78.9779	28.1645	35.3155	16.0677	11517	NM_001025372
Antxr1	268.154	1.16311	0.182373	6.37767	1.79806e-10	6.83665e-09	208.892	91.707	97.9155	12.3137	69538	NM_054041
Asns	47.6395	2.04749	0.340442	6.01422	1.80757e-09	5.18993e-08	53.3327	25.3634	19.7208	10.3699	27053	NM_012055
Asprv1	6.09673	3.61166	0.787777	4.58462	4.54804e-06	4.41051e-05	7.02167	4.64852	0.944149	0.669305	67855	NM_026414
C1galt1	108.51	1.07209	0.177348	6.04513	1.49292e-09	4.44434e-08	105.337	49.9954	51.7548	11.9459	94192	NM_052993
C1ra	263.139	1.14052	0.169548	6.72681	1.73423e-11	9.60895e-10	224.273	69.975	109.529	31.4865	50909	NM_023143
C1rl	13.9003	1.88463	0.417537	4.51368	6.3711e-06	5.83929e-05	14.0173	7.37299	4.37944	1.9263	232371	NM_181344
C3ar1	56.9559	1.51711	0.309059	4.9088	9.16369e-07	1.12611e-05	62.3435	32.9194	18.6419	11.2818	12267	NM_009779
Cadps2	19.4622	1.90045	0.336478	5.64805	1.6228e-08	3.43833e-07	24.0996	11.7535	8.96774	2.98966	320405	NM_001252105
Chl1	19.2142	2.11629	0.347406	6.09169	1.11723e-09	3.49527e-08	21.0711	11.209	6.67327	4.90174	12661	NM_007697
Clec4a3	22.6327	2.14905	0.416299	5.16227	2.43976e-07	3.49274e-06	29.3129	23.9806	5.38468	5.01812	73149	NM_001204241
Clec7a	24.7404	2.2968	0.425649	5.39599	6.81452e-08	1.15157e-06	39.2465	29.3254	6.58964	5.20855	56644	NM_001309637
Creb5	27.4522	1.34679	0.281156	4.79018	1.66632e-06	1.87245e-05	27.2768	10.5383	11.5507	4.75277	231991	NM_001327821
Cycs	1435.31	-1.00944	0.152084	-6.63738	3.1931e-11	1.61879e-09	583.552	289.155	1224.94	124.304	13063	NM_007808
Emp1	551.156	1.03738	0.158716	6.53606	6.31616e-11	2.88758e-09	388.352	98.9492	214.519	61.077	13730	NM_001288627
Eps8	138.669	1.17126	0.197413	5.93307	2.97328e-09	7.88817e-08	128.585	39.2195	63.1049	24.7607	13860	NM_001271587
Fam13a	377.918	1.32283	0.184815	7.15757	8.21206e-13	7.42032e-11	409.842	161.095	214.901	64.7163	58909	NM_153574
Frmd4b	142.236	1.27373	0.181491	7.01817	2.24797e-12	1.78918e-10	157.732	49.2349	64.8244	17.0472	232288	NM_001346637
Gpnmb	113.317	1.31667	0.217622	6.05028	1.4459e-09	4.32953e-08	164.654	59.8058	62.0922	17.3764	93695	NM_053110
Il17rc	48.7771	1.05812	0.191619	5.52201	3.35138e-08	6.29346e-07	43.32	14.3923	25.7819	6.13406	171095	NM_134159
Lrmp	24.6156	2.3365	0.462115	5.0561	4.27923e-07	5.68135e-06	63.7781	106.288	3.66643	2.06195	16970	NM_001281980
Mgst1	538.233	1.16216	0.227089	5.11763	3.09399e-07	4.30106e-06	440.88	182.421	279.59	114.206	56615	NM_001347489
Mmrn1	106.498	3.19677	0.322295	9.91877	3.44975e-23	6.62396e-20	109.557	67.9647	13.2256	9.09483	70945	NM_001163507
Mob1a	121.511	1.10059	0.226766	4.8534	1.21366e-06	1.42749e-05	144.003	73.3077	55.2432	18.1665	232157	NM_145571
Mrps33	123.404	-1.0378	0.14317	-7.24876	4.2061e-13	4.14166e-11	52.3687	16.8448	95.8712	13.6917	14548	NM_001010930
Ndufa4	3486.41	-1.10381	0.159177	-6.93449	4.07688e-12	2.96801e-10	1490.88	563.261	3266.91	361.79	17992	NM_010886
Ndufb2	893.365	-1.25989	0.195232	-6.45327	1.09463e-10	4.5445e-09	386.63	213.383	935.416	120.258	68198	NM_001358797
Pparg	135.93	1.35161	0.222538	6.07363	1.25053e-09	3.84189e-08	135.405	49.0232	69.2366	18.8831	19016	NM_001127330
Rassf4	139.012	1.2638	0.174099	7.25906	3.89795e-13	3.91349e-11	242.133	232.533	57.409	10.3098	213391	NM_178045
Scrn1	21.066	2.44203	0.379953	6.42719	1.29982e-10	5.18611e-09	16.8197	11.3829	3.70883	0.712887	69938	NM_027268
Smo	103.694	1.25087	0.250287	4.99776	5.79996e-07	7.45549e-06	81.666	40.4026	35.5901	16.6728	319757	NM_176996
Srgap3	25.5208	2.08524	0.395585	5.27128	1.35475e-07	2.06265e-06	39.7654	28.8739	7.94048	3.4403	259302	NM_080448
Tacstd2	5.25508	4.28923	0.948907	4.52018	6.17872e-06	5.70381e-05	8.18439	13.721	0.753052	0.781176	56753	NM_020047
Tapbpl	54.1591	1.5321	0.268499	5.70614	1.15566e-08	2.54327e-07	68.5631	51.9341	18.4641	2.29827	213233	NM_145391
Tbxas1	24.3615	1.58812	0.336238	4.7232	2.32161e-06	2.50086e-05	27.7091	15.9245	9.72377	6.67475	21391	NM_011539
Tgfa	14.6026	2.0809	0.408405	5.09519	3.48391e-07	4.76548e-06	19.6069	12.9092	5.49456	1.04541	21802	NM_031199
Tmem176a	115.8	1.08721	0.225429	4.82285	1.41522e-06	1.6284e-05	145.23	60.2915	52.3852	14.4162	66058	NM_001098271
Tmem176b	282.248	1.02803	0.168523	6.10021	1.0593e-09	3.33441e-08	328.244	111.133	148.912	32.5637	65963	NM_001164207
Aamdc	739.97	-1.07774	0.142426	-7.56701	3.8192e-14	5.5346e-12	342.964	96.2061	721.852	72.0587	66273	NM_001177945
Abhd2	63.052	1.59775	0.247714	6.44998	1.11867e-10	4.59462e-09	88.5918	38.0378	23.1649	6.73416	54608	NM_018811
Acsm3	32.9357	2.89262	0.505719	5.71982	1.06637e-08	2.37055e-07	61.2267	40.1201	12.2003	11.848	20216	NM_016870
Acsm5	13.0018	2.64346	0.518558	5.09771	3.43789e-07	4.71934e-06	20.6487	12.9485	5.50409	4.12097	272428	NM_178758
Adam12	29.0591	2.4448	0.526153	4.64656	3.37513e-06	3.43083e-05	34.2379	29.0502	7.48798	9.17842	11489	NM_007400
Adm	43.8583	1.03237	0.229795	4.49257	7.03685e-06	6.39226e-05	54.6311	30.7878	27.122	6.71871	11535	NM_009627
Aldh1a3	52.5908	1.37966	0.295958	4.66169	3.13627e-06	3.22034e-05	43.675	18.7356	16.8108	7.93494	56847	NM_053080
Anpep	223.488	1.62597	0.246832	6.58736	4.47709e-11	2.15588e-09	235.614	157.373	82.4673	21.0897	16790	NM_008486
Apobr	22.6072	1.79436	0.386799	4.63901	3.50085e-06	3.53561e-05	27.4695	13.8326	7.24013	5.44835	171504	NM_138310
Apoc1	29.1054	3.15699	0.345304	9.14266	6.09333e-20	4.80514e-17	33.2277	17.2866	5.54598	3.27456	11812	NM_001110009
Apoe	3426.44	1.21919	0.148206	8.22632	1.93051e-16	6.05196e-14	3301.04	1311.53	1433.64	304.597	11816	NM_001305819
Atp1a3	25.4838	2.00068	0.436002	4.58868	4.46056e-06	4.35039e-05	23.477	14.2159	5.66259	4.67714	232975	NM_001290469
BC048679	71.3661	-1.94558	0.25586	-7.6041	2.86884e-14	4.32042e-12	34.2413	21.397	104.041	14.4651	210321	NM_001193274
Capn5	56.3582	1.88657	0.303569	6.21463	5.14443e-10	1.77183e-08	54.7015	25.6684	15.6657	9.71991	12337	NM_001301250
Ccnd1	162.466	1.48478	0.21686	6.84672	7.5563e-12	4.91832e-10	181.562	57.1547	66.8683	20.4544	12443	NM_001379248
Cd33	15.8396	2.67817	0.451049	5.93764	2.89154e-09	7.69791e-08	16.523	7.6546	2.51033	2.13677	12489	NM_001111058
Cdr2	49.663	1.1628	0.242587	4.79334	1.64028e-06	1.84724e-05	44.0748	12.0892	22.9467	12.2063	12585	NM_001354986
Clec11a	25.4711	1.67324	0.352775	4.74309	2.10488e-06	2.28502e-05	14.8112	5.97967	5.16608	3.01115	20256	NM_009131
Cox6b1	2687.11	-1.03823	0.146374	-7.09304	1.31196e-12	1.09528e-10	1247.13	352.989	2546.61	301.192	110323	NM_025628
Cox7a1	1617.62	-1.23981	0.193363	-6.41181	1.43804e-10	5.66405e-09	634.399	299.629	1575.24	260.578	12865	NM_009944
Cox8b	2418.79	-1.21297	0.174309	-6.95877	3.43249e-12	2.54717e-10	1102.42	475.142	2551.16	324.01	12869	NM_007751
Cpxm2	183.572	1.15239	0.1644	7.00968	2.38855e-12	1.87197e-10	131.16	45.0765	67.6257	11.8325	55987	NM_018867
Cyp2f2	184.959	1.78199	0.274516	6.4914	8.50417e-11	3.64895e-09	290.529	122.149	111.612	69.5847	13107	NM_007817
D7Ertd715e	24.465	-1.75578	0.30541	-5.74891	8.9821e-09	2.03501e-07	8.69645	5.89705	30.9453	3.69083	NA	NA
Dmkn	21.6672	4.1398	0.630418	6.56676	5.14234e-11	2.41564e-09	24.6571	18.8975	3.35351	3.55626	73712	NM_001166173
Fah	75.5698	1.26252	0.264686	4.76986	1.84351e-06	2.04315e-05	78.6442	39.4355	32.0161	19.1858	14085	NM_010176
Fgfr2	20.9343	3.42046	0.650596	5.25742	1.46088e-07	2.20871e-06	34.7602	53.335	4.95204	5.95105	14183	NM_001347638
Folr2	152.291	1.3973	0.273827	5.10285	3.34581e-07	4.60528e-06	99.8891	45.2938	33.9477	17.8738	14276	NM_001303231
Hdgfrp3	55.4394	1.16872	0.191725	6.09583	1.08872e-09	3.41302e-08	63.965	18.5763	27.6234	6.50417	NA	NA
Hpx	6.56009	5.9958	1.25619	4.77299	1.81507e-06	2.01796e-05	12.3868	16.3829	0.170538	0.381334	15458	NM_017371
Ifitm6	8.65632	3.00816	0.67438	4.46063	8.17183e-06	7.23502e-05	9.06284	5.23649	1.07653	1.63536	213002	NM_001033632
Isg20	29.6897	1.67963	0.261224	6.42985	1.2773e-10	5.10953e-09	45.9375	28.7536	14.9221	4.38605	57444	NM_001113527
Itgam	93.8252	1.94221	0.333113	5.83048	5.52696e-09	1.36495e-07	113.142	86.6007	27.4331	20.2328	16409	NM_001082960
Kcnk6	35.4884	1.46629	0.282638	5.18787	2.12712e-07	3.08543e-06	37.2743	31.8239	12.5752	6.36079	52150	NM_001033525
Kcnq1ot1	262.424	-1.02307	0.220727	-4.63501	3.56924e-06	3.59522e-05	165.234	79.6043	276.869	74.7126	63830	NR_001461
Lyve1	235.051	1.90462	0.221428	8.60152	7.86696e-18	3.66195e-15	227.969	98.4089	77.3288	23.8073	114332	NM_053247
Mcee	237.573	-1.24409	0.149155	-8.34097	7.36842e-17	2.63224e-14	110.366	40.0934	246.994	43.0017	73724	NM_001355124
Mki67	59.289	1.98106	0.405162	4.88956	1.01063e-06	1.21569e-05	342.57	626.451	22.2459	9.5771	17345	NM_001081117
Myod1	158.291	-1.34996	0.170144	-7.93417	2.11909e-15	4.52102e-13	84.4543	37.9334	164.81	37.0543	17927	NM_010866
Napsa	20.0581	2.74012	0.606847	4.51533	6.3217e-06	5.81483e-05	186.463	360.433	4.70619	2.7803	16541	NM_008437
Ndufa3	1460.14	-1.43701	0.172745	-8.31866	8.89611e-17	3.10575e-14	627.9	267.48	1611.72	210.653	66091	NM_025348
Nox4	50.2872	1.92257	0.239617	8.02352	1.02759e-15	2.46638e-13	54.7474	31.001	21.7504	6.93941	50490	NM_001285833
Olfml1	56.0066	1.13764	0.22934	4.96049	7.03147e-07	8.87514e-06	32.6319	12.8986	18.9477	8.42521	244198	NM_172907
Pde3b	284.892	1.70797	0.362549	4.71101	2.46495e-06	2.63678e-05	353.032	140.036	154.284	76.709	18576	NM_011055
Plin1	646.018	1.33886	0.299529	4.4699	7.82559e-06	6.96929e-05	531.121	191.073	284.112	140.367	103968	NM_001113471
Prkcb	81.7424	2.3488	0.457538	5.13355	2.8433e-07	3.98868e-06	316.197	518.478	21.0561	10.5357	18751	NM_001316672
Ptpre	43.9918	1.26412	0.275383	4.59043	4.42337e-06	4.31686e-05	43.4781	18.3739	15.5984	8.1167	19267	NM_001316678
Sbsn	36.1989	1.90014	0.287321	6.61329	3.75872e-11	1.85652e-09	33.4003	12.9334	13.0266	4.33519	282619	NM_001083903
Sepw1	6089.66	-1.0187	0.166803	-6.10722	1.01384e-09	3.21767e-08	2899.91	927.846	6258.04	688.02	NA	NA
Stard5	46.9284	1.20831	0.238564	5.06494	4.08527e-07	5.47109e-06	70.1614	46.3518	24.9224	4.483	170460	NM_023377
Tacc2	9058.52	-1.20108	0.11711	-10.2561	1.11132e-24	2.84515e-21	4172.91	2077.22	8058.96	524.338	57752	NM_001004468
Tmem126a	492.751	-1.23928	0.132602	-9.34589	9.11214e-21	9.93789e-18	232.91	89.9436	515.108	48.2991	66271	NM_025460
Tmem147	875.222	-1.13721	0.153737	-7.39711	1.39183e-13	1.59551e-11	418.245	135.413	935.384	151.58	69804	NM_027215
Trim30d	32.5564	1.34929	0.288039	4.68441	2.80763e-06	2.94188e-05	41.0811	18.1862	12.8122	4.20729	209387	NM_001167828
Tyrobp	81.033	1.30239	0.246617	5.281	1.28479e-07	1.98548e-06	91.8219	66.0792	31.0236	10.4308	22177	NM_011662
Ucp2	543.01	1.23398	0.179243	6.88442	5.80251e-12	3.94391e-10	820.34	599.238	271.813	65.6459	22228	NM_011671
Cd209a	26.8649	2.60174	0.34622	7.5147	5.70421e-14	7.52554e-12	23.9354	10.8475	4.4194	4.72891	170786	NM_133238
Cdh1	26.7199	2.30098	0.472118	4.87374	1.09504e-06	1.30193e-05	37.7993	48.1319	10.0314	6.10823	12550	NM_009864
Cdh11	40.4421	3.49329	0.467265	7.47605	7.65915e-14	9.56521e-12	47.9626	51.1498	5.57684	2.47638	12552	NM_009866
Coa6	136.44	-1.11408	0.185582	-6.00314	1.93534e-09	5.49514e-08	64.1351	22.317	121.912	32.9969	67892	NM_174987
Comp	108.807	2.1011	0.404453	5.19493	2.04794e-07	2.97825e-06	56.665	29.5281	18.5502	12.9778	12845	NM_016685
Cotl1	176.705	1.21388	0.247763	4.89935	9.61547e-07	1.16785e-05	280.961	319.442	63.9692	19.745	72042	NM_028071
Fam149a	31.1262	1.55632	0.338649	4.59569	4.31317e-06	4.23658e-05	33.8302	14.7068	12.1881	6.05969	212326	NM_153535
Gpm6a	37.1752	1.68058	0.326382	5.14912	2.61705e-07	3.72571e-06	42.1582	21.1801	15.3422	7.60112	234267	NM_001253754
Kbtbd11	79.9151	2.09293	0.38392	5.45148	4.99529e-08	8.82999e-07	92.3243	50.5932	21.4646	10.8717	74901	NM_029116
Klhl2	96.7202	1.2448	0.251221	4.95502	7.2323e-07	9.11365e-06	94.9145	37.3626	57.6286	17.7503	77113	NM_178633
2021-03-01	34.0545	2.70868	0.342372	7.91151	2.54295e-15	5.27869e-13	69.7812	69.0692	6.6772	3.14331	NA	NA
Mlkl	13.5867	1.75787	0.372555	4.71842	2.37685e-06	2.54964e-05	14.1287	6.24832	4.87245	1.89219	74568	NM_001310613
Plat	106.744	1.62298	0.253635	6.39888	1.56524e-10	6.05635e-09	107.381	76.5246	39.2011	6.78508	18791	NM_008872
Plcg2	53.2693	1.67678	0.353429	4.74433	2.09199e-06	2.27424e-05	176.924	289.492	16.1645	2.81151	234779	NM_172285
Rab11fip1	11.6569	2.70568	0.610629	4.43098	9.38076e-06	8.16586e-05	18.7219	14.8399	2.09181	1.81509	75767	NM_001080813
Rnf122	70.5937	-1.05191	0.193016	-5.44984	5.04138e-08	8.88081e-07	38.7742	12.3845	59.5003	7.99454	68867	NM_001368373
Sfrp1	66.8827	1.55932	0.207283	7.52265	5.36773e-14	7.21395e-12	64.3164	23.3436	25.7214	6.2372	20377	NM_013834
Smpd3	98.2492	2.13557	0.316486	6.74773	1.50175e-11	8.67232e-10	108.07	56.5206	25.1831	13.4229	58994	NM_021491
Tbc1d9	30.9822	2.01575	0.277784	7.25654	3.97127e-13	3.96122e-11	90.8702	110.148	12.9376	5.02852	71310	NM_001111304
Tusc3	39.0492	1.29519	0.275733	4.69726	2.63672e-06	2.78752e-05	36.3616	13.8377	14.9612	5.14916	80286	NM_001357304
Zfp90	16.8358	1.58549	0.348102	4.55466	5.24713e-06	4.95093e-05	19.8475	5.60506	5.53055	2.8622	22751	NM_001368328
1600029D21Rik	20.7783	5.11628	0.884059	5.78727	7.15406e-09	1.68069e-07	60.6264	118.449	1.74317	1.56965	NA	NA
1700017B05Rik	72.8083	1.17356	0.246524	4.76042	1.93186e-06	2.12727e-05	124.962	108.865	41.3933	13.1977	74211	NM_028820
4931406C07Rik	161.569	1.17065	0.205248	5.70358	1.17318e-08	2.57446e-07	145.985	58.5967	92.227	25.277	70984	NM_001199484
AI118078	59.7217	-1.04303	0.209875	-4.96975	6.70379e-07	8.49644e-06	30.0262	16.7539	61.0216	6.5846	NA	NA
AW551984	20.1208	2.4279	0.529154	4.58827	4.46925e-06	4.3561e-05	9.1501	4.97282	0.93005	0.670598	244810	NM_001199556
Acaa1b	13.5316	2.60092	0.450836	5.7691	7.96953e-09	1.84646e-07	14.4252	9.70732	4.28997	2.11241	235674	NM_146230
Acp5	200.591	1.48896	0.26927	5.52961	3.20943e-08	6.08543e-07	196.772	141.467	64.8566	22.1884	11433	NM_001102404
Acpp	8.19345	4.80177	0.955273	5.02659	4.9927e-07	6.53975e-06	22.5244	35.9648	0.891895	1.27954	56318	NM_019807
Casp1	20.2404	1.73896	0.369185	4.71027	2.47391e-06	2.64335e-05	40.5722	41.538	7.80807	5.26147	12362	NM_009807
Ccbp2	31.2986	1.44499	0.307944	4.6924	2.7002e-06	2.84679e-05	57.9738	60.7136	13.715	6.11836	NA	NA
Ccr1	13.9406	3.37228	0.609988	5.52845	3.2308e-08	6.10234e-07	47.3732	75.2284	2.29117	2.69242	12768	NM_009912
Ccr5	21.7925	2.62137	0.432915	6.05515	1.40284e-09	4.21702e-08	42.9482	41.0948	4.24781	3.23754	12774	NM_009917
Cd109	22.7908	2.34955	0.356507	6.59048	4.38398e-11	2.13109e-09	19.7769	11.7308	5.21003	2.85812	235505	NM_153098
Cgnl1	278.047	1.24744	0.139318	8.95389	3.43159e-19	2.19636e-16	258.964	97.3572	133.233	22.6012	68178	NM_001304362
Clmp	82.8719	1.59157	0.201776	7.88777	3.07638e-15	6.13717e-13	74.5401	33.4513	31.9021	6.27357	71566	NM_133733
Col12a1	175.061	1.6396	0.269197	6.09071	1.12414e-09	3.50974e-08	100.794	52.1895	40.1423	20.7958	12816	NM_001290308
Col6a5	30.6766	4.56497	0.793105	5.75582	8.62226e-09	1.968e-07	53.9073	35.9333	2.18853	1.82385	665033	NM_001167923
Col7a1	66.9225	-1.61391	0.268625	-6.00802	1.87799e-09	5.35211e-08	29.9361	9.68504	85.6682	20.302	12836	NM_007738
Cox5a	3012.03	-1.09452	0.12309	-8.89197	6.00339e-19	3.68872e-16	1512.19	564.137	2995.19	303.472	12858	NM_007747
Cox7a2	1369.4	-1.29763	0.157456	-8.24123	1.70446e-16	5.45464e-14	578.891	222.538	1400.82	150.619	12866	NM_009945
Ctsh	179.504	1.39826	0.233431	5.99002	2.09811e-09	5.8705e-08	232.792	220.045	60.5842	25.8587	13036	NM_001312649
Deb1	339.711	-1.23313	0.180863	-6.81805	9.22858e-12	5.73928e-10	140.7	53.0062	342.547	48.8737	NA	NA
Dennd4a	92.3674	1.24633	0.188387	6.61576	3.69652e-11	1.84358e-09	100.172	65.7422	35.04	9.28194	102442	NM_001162917
Elovl4	13.8821	3.51506	0.689981	5.09444	3.49776e-07	4.78016e-06	9.83807	7.0347	2.68418	1.67828	83603	NM_148941
Endod1	100.178	1.06424	0.146937	7.24281	4.39498e-13	4.30009e-11	107.887	37.8222	53.9074	11.8787	71946	NM_028013
Fam46a	163.783	1.15293	0.187223	6.15805	7.36467e-10	2.40188e-08	137.749	56.514	74.1857	17.7181	NA	NA
Gm20199	8.03091	-2.70469	0.509328	-5.3103	1.09444e-07	1.74576e-06	3.86645	3.59852	13.518	6.24784	100504377	NR_045640
Kbtbd13	121.645	-1.1118	0.17577	-6.32528	2.5277e-10	9.22281e-09	46.283	29.7082	79.836	12.6764	74492	NM_028974
Lars2	36989.6	-1.39895	0.154787	-9.03788	1.59746e-19	1.08712e-16	19357.5	11171.6	45247.4	5533.63	102436	NM_001348167
Mpzl2	25.0754	1.8785	0.315804	5.94831	2.70929e-09	7.35289e-08	28.7315	14.092	11.2275	3.31772	14012	NM_001357727
Myo5a	227.712	1.25812	0.148904	8.44918	2.93355e-17	1.09908e-14	280.9	190.741	107.56	26.6263	17918	NM_010864
Nnmt	74.2462	1.31693	0.297278	4.42997	9.42456e-06	8.19766e-05	62.0579	23.5286	37.9367	16.635	18113	NM_001311062
Nt5e	35.3596	1.74557	0.317089	5.50499	3.69183e-08	6.84906e-07	42.8301	25.5224	15.2812	4.7172	23959	NM_011851
Ptpn9	96.4644	1.01362	0.165379	6.12908	8.83887e-10	2.84046e-08	100.213	34.6806	54.3151	12.8534	56294	NM_019651
Rps27l	664.007	-1.09873	0.183254	-5.99564	2.02683e-09	5.70223e-08	315.063	120.458	694.592	89.3774	67941	NM_001311101
Scg3	15.0059	2.07777	0.454472	4.57185	4.83446e-06	4.63271e-05	11.4972	5.2088	2.6986	1.80497	20255	NM_001164790
Sh2d7	89.235	-1.12858	0.216145	-5.22139	1.77584e-07	2.64328e-06	42.7971	11.5396	101.786	23.0842	244885	NM_173778
Sh3bgrl2	22.3336	1.62631	0.334795	4.85762	1.18803e-06	1.40318e-05	32.3293	22.0731	9.46256	1.96461	212531	NM_172507
Shisa5	311.006	1.01943	0.222038	4.59125	4.40595e-06	4.30533e-05	403.317	269.194	148.851	32.5255	66940	NM_001284332
Sik2	268.709	1.26639	0.192846	6.56685	5.13892e-11	2.41564e-09	270.516	131.361	135.697	35.4538	235344	NM_178710
Slc36a4	20.3046	2.07258	0.339066	6.11262	9.80099e-10	3.12351e-08	22.0437	11.5154	5.21047	3.11367	234967	NM_001357565
Slco2a1	79.5526	1.73742	0.250943	6.92358	4.40373e-12	3.16101e-10	80.6742	33.8496	26.469	14.9332	24059	NM_033314
St14	10.0391	3.39039	0.614084	5.52105	3.36986e-08	6.32045e-07	31.1724	28.6082	3.28248	1.12601	19143	NM_011176
Tbc1d2b	188.392	1.04281	0.175576	5.93936	2.86129e-09	7.63059e-08	160.082	41.9547	75.3025	20.946	67016	NM_194334
Timm8b	723.693	-1.14647	0.147944	-7.74932	9.23836e-15	1.68941e-12	318.696	105.956	705.709	48.6681	30057	NM_013897
Tma7	604.103	-1.02173	0.184367	-5.54182	2.99346e-08	5.75502e-07	324.38	115.37	663.573	63.9403	66167	NM_183250
Tmod2	186.034	1.28766	0.186245	6.91378	4.71901e-12	3.37156e-10	171.077	54.1127	80.4454	28.2476	50876	NM_001038710
Tmppe	45.4158	1.43219	0.248409	5.76547	8.14314e-09	1.881e-07	46.957	23.1617	19.0806	6.93568	100504715	NM_001200002
Trf	1678.94	1.89561	0.238389	7.95176	1.83878e-15	4.15375e-13	1492.18	633.504	543.437	228.915	22041	NM_133977
Trim29	7.27903	3.94611	0.774437	5.09546	3.47901e-07	4.76302e-06	6.25337	4.81241	0.944149	0.669305	72169	NM_023655
Vill	12.9344	2.10058	0.434617	4.83318	1.34371e-06	1.56251e-05	28.7773	30.322	4.37373	4.03644	22351	NM_001164567
Zfp560	42.5085	-1.02294	0.200476	-5.10256	3.35084e-07	4.60808e-06	29.725	12.9921	42.503	4.52248	434377	NM_001004190

## Sheet: sigDEGs_24m_vs_2m
symbol	baseMean	log2FoldChange	lfcSE	stat	pvalue	padj	mean_WT_Muscle_24m	sd_WT_Muscle_24m	mean_WT_Muscle_2m	sd_WT_Muscle_2m	entrez	refseq
1110058L19Rik	178.435	1.16219	0.231732	5.01523	5.29701e-07	3.47427e-06	188.726	37.0749	79.9986	10.6445	NA	NA
1500015O10Rik	20.6585	-5.54688	0.73938	-7.50207	6.28166e-14	1.4845e-12	0.907944	0.605531	34.5114	9.30999	NA	NA
4933415F23Rik	8.79099	3.9468	0.696586	5.66592	1.46234e-08	1.32996e-07	12.4531	4.16535	0.794479	1.04595	NA	NA
5430435G22Rik	76.3916	-1.44005	0.196387	-7.33273	2.25511e-13	4.79126e-12	28.781	6.866	86.7571	17.8496	NA	NA
Adam23	32.1865	-1.44609	0.272732	-5.30224	1.1439e-07	8.5924e-07	13.794	6.07778	41.6279	11.45	23792	NM_001177600
Angptl1	102.985	-2.35786	0.22212	-10.6152	2.53177e-26	2.9241e-24	33.5561	8.83036	182.721	50.3501	72713	NM_028333
C130026I21Rik	18.1033	5.16529	0.943613	5.47395	4.40117e-08	3.62695e-07	10.3401	7.50064	0.216621	0.324549	620078	NM_001037909
Casp8	71.0688	-1.17344	0.20211	-5.80594	6.40057e-09	6.23457e-08	37.9278	6.70438	78.8432	20.4157	12370	NM_001080126
Cd34	944.574	-1.34602	0.116272	-11.5765	5.42143e-31	9.57225e-29	405.301	72.3484	1029.87	80.2167	12490	NM_001111059
Cd48	29.8905	-2.04845	0.414717	-4.93939	7.83665e-07	4.95794e-06	9.36806	4.26309	41.8489	36.0022	12506	NM_001360767
Cd84	37.3533	-1.9082	0.347294	-5.49449	3.9184e-08	3.26413e-07	15.1505	8.01504	52.9498	23.7406	12523	NM_001252472
Cdk18	62.1042	1.49271	0.179346	8.32306	8.57193e-17	3.16523e-15	66.1936	3.79568	23.8417	2.77938	18557	NM_008795
Cfh	425.871	-1.36833	0.192798	-7.09723	1.2728e-12	2.367e-11	137.269	32.903	348.554	101.866	12628	NM_009888
Chpf	94.6354	-1.56048	0.185396	-8.41706	3.86056e-17	1.49753e-15	44.003	10.0672	139.006	21.168	74241	NM_001001565
Chrng	7.48838	4.74808	0.743138	6.38923	1.66721e-10	2.20018e-09	12.0049	3.72743	0.574468	0.813678	11449	NM_009604
Col3a1	4137.91	-3.52108	0.268019	-13.1374	2.00955e-39	6.85969e-37	800.433	250.557	9655.29	1818.32	12825	NM_009930
Col5a2	546.025	-2.91884	0.178375	-16.3635	3.48508e-60	4.46119e-57	147.035	32.0725	1144.7	181.65	12832	NM_007737
Col6a3	1211.5	-2.22864	0.161164	-13.8284	1.71915e-43	8.51867e-41	410.597	100.205	2013.81	329.271	12835	NM_001243008
Crispld1	43.5754	-2.04324	0.282569	-7.23097	4.79573e-13	9.6297e-12	17.164	11.5946	64.8986	5.86026	83691	NM_001356551
Cxcr7	406.323	-1.03751	0.128332	-8.0846	6.23676e-16	2.02116e-14	177.233	33.8474	381.238	49.9344	NA	NA
D1Ertd622e	116.406	-1.10989	0.150995	-7.35048	1.97496e-13	4.26086e-12	69.4838	9.94654	155.874	18.1169	NA	NA
Ddr2	600.259	-1.45969	0.122396	-11.9259	8.66901e-33	1.77553e-30	249.171	50.9172	688.686	50.3362	18214	NM_022563
Dock10	109.175	-2.01505	0.279144	-7.21865	5.25047e-13	1.04743e-11	38.5094	17.7819	154.384	70.9476	210293	NM_001285927
Dpt	1467.51	-1.09709	0.142619	-7.6925	1.44291e-14	3.75036e-13	540.646	150.159	1139.1	108.442	56429	NM_019759
Dsel	59.3985	-1.44077	0.215281	-6.69249	2.1941e-11	3.32711e-10	24.0747	6.53462	71.8435	9.22807	319901	NM_001081316
Dusp10	273.991	-1.60403	0.169924	-9.43968	3.73921e-21	2.599e-19	143.513	17.9627	439.4	20.4883	63953	NM_022019
Efhd1	74.4669	-1.26377	0.218809	-5.77568	7.66435e-09	7.35366e-08	31.8293	6.81717	78.1822	12.4373	98363	NM_028889
Esrrg	232.335	1.14732	0.176933	6.48448	8.90371e-11	1.23774e-09	251.528	39.0797	114.399	27.5213	26381	NM_001243792
Fam117b	192.6	1.06156	0.154179	6.88521	5.77032e-12	9.58248e-11	151.513	23.2508	76.4084	8.50188	72750	NM_001037725
Fam129a	223.405	-1.02719	0.126596	-8.11391	4.90163e-16	1.61923e-14	109.586	22.7876	229.899	13.5837	NA	NA
Fam174a	464.644	1.04956	0.148636	7.06131	1.64935e-12	3.00186e-11	481.315	75.5191	225.844	19.4013	67698	NM_026321
Fcer1g	85.7917	-1.58267	0.244667	-6.46867	9.88683e-11	1.36086e-09	33.208	11.8808	102.674	24.0016	14127	NM_010185
Fcgr3	109.087	-1.28838	0.248316	-5.18846	2.12042e-07	1.50586e-06	40.0907	11.3038	106.067	23.7634	14131	NM_001356511
Fmod	1036.99	-2.77181	0.312392	-8.87283	7.13075e-19	3.52204e-17	199.457	109.705	1266.21	163.59	14264	NM_021355
Fn1	2367.6	-1.96036	0.225987	-8.67464	4.14878e-18	1.83658e-16	775.398	210.108	3096.18	397.285	14268	NM_001276408
Gdap1	82.3071	1.09213	0.179989	6.06776	1.29707e-09	1.43297e-08	72.2858	15.1106	32.5847	7.16927	14545	NM_010267
Glul	8551.03	1.66919	0.161313	10.3475	4.29401e-25	4.36823e-23	7006.77	1217.12	2178.28	180.602	14645	NM_008131
Gm15179	132.913	1.40952	0.185089	7.61539	2.62897e-14	6.59863e-13	164.528	23.266	58.8213	6.50014	100503248	NR_037976
Grem2	78.9089	-3.51112	0.255265	-13.7548	4.76695e-43	2.09214e-40	15.988	6.20832	177.139	40.7781	23893	NM_011825
Hmcn1	33.0485	-2.15333	0.304096	-7.08108	1.43032e-12	2.6376e-11	10.1398	4.5215	48.8561	5.04154	545370	NM_001024720
Hmga2-ps1	105.567	3.3377	0.266155	12.5405	4.48317e-36	1.25211e-33	129.278	13.7992	12.4313	4.7427	15365	NR_037996
Ifi203	112.933	-1.05227	0.215637	-4.8798	1.06195e-06	6.54076e-06	61.5321	18.0665	127.114	41.3965	15950	NM_001045481
Ifi204	96.7542	-1.0557	0.202884	-5.20347	1.95606e-07	1.4021e-06	34.7953	15.1661	73.9373	13.5572	15951	NM_008329
Igfn1	1092.31	1.49994	0.196942	7.61616	2.61343e-14	6.57035e-13	963.155	192.165	351.966	104.946	226438	NM_177642
Il1r2	9.69251	-2.25719	0.488636	-4.61937	3.84912e-06	2.09297e-05	2.86896	1.96914	12.819	4.26628	16178	NM_001360800
Il1rl2	20.2483	-4.19188	0.495557	-8.45893	2.6984e-17	1.07384e-15	1.06876	1.13181	31.9546	6.87793	107527	NM_001356478
Ildr2	65.5634	-1.22482	0.230697	-5.30921	1.10102e-07	8.30275e-07	19.191	6.89069	52.6125	13.7313	100039795	NM_001164528
Kcnk2	27.4517	-1.47576	0.294082	-5.0182	5.21569e-07	3.42386e-06	9.09023	2.70092	28.7655	7.25853	16526	NM_001159850
Kcnq5	234.67	1.38103	0.198085	6.97193	3.12614e-12	5.41382e-11	230.619	54.7668	90.9776	24.7713	226922	NM_001160139
Kif21b	52.2933	-2.44351	0.546989	-4.4672	7.92516e-06	3.99535e-05	15.9991	7.20149	83.597	60.3152	16565	NM_001039472
Kmo	7.52616	-3.27172	0.706794	-4.62896	3.67503e-06	2.00944e-05	0.92682	0.0922068	11.4338	5.48125	98256	NM_133809
Lamc1	1597.03	-1.26787	0.119464	-10.6129	2.59523e-26	2.97502e-24	748.494	74.3214	1889.3	180.793	226519	NM_010683
Lefty1	11.231	-1.55183	0.351287	-4.41755	9.98267e-06	4.93354e-05	5.06331	2.05648	15.4476	3.70318	13590	NM_010094
Lrrc52	26.4378	4.30582	0.458022	9.4009	5.4097e-21	3.67692e-19	38.3612	14.1564	1.7558	1.49301	240899	NM_001013382
Ly9	15.4449	-2.97518	0.665342	-4.47166	7.76134e-06	3.92307e-05	3.69504	2.75335	27.1892	24.8636	17085	NM_001277968
Map4k4	436.668	-1.03176	0.107813	-9.56992	1.06992e-21	7.75237e-20	235.027	32.0443	491.762	45.9869	26921	NM_001252200
2021-03-01	13.5944	-2.51927	0.522448	-4.82205	1.4209e-06	8.50933e-06	2.91122	3.34854	17.5115	7.74923	NA	NA
Mcm6	56.0512	-1.17786	0.25353	-4.64585	3.38683e-06	1.8741e-05	27.6637	7.81486	61.9025	26.7846	17219	NM_001313695
Mfsd6	94.1976	-1.09469	0.192981	-5.67252	1.40709e-08	1.28503e-07	41.9747	5.71456	94.3324	13.6715	98682	NM_001357464
Mgst3	1130.71	1.06882	0.127499	8.38295	5.16169e-17	1.96259e-15	1138.23	156.049	517.024	59.9907	66447	NM_025569
Mpz	1273.25	-1.40439	0.179871	-7.80775	5.82172e-15	1.62006e-13	717.304	111.633	1969.67	479.456	17528	NM_001315499
Mpzl1	65.6611	-1.31576	0.246962	-5.32781	9.94044e-08	7.57416e-07	31.1513	4.74165	81.6542	9.98462	68481	NM_001001880
Mrps14	344.404	1.10647	0.17602	6.28606	3.25614e-10	4.04019e-09	365.903	38.1038	166.183	5.98402	64659	NM_001347121
Myeov2	479.226	1.19147	0.184082	6.47249	9.63994e-11	1.33165e-09	482.255	68.5047	204.288	20.216	NA	NA
Ncf2	41.3832	-1.39247	0.301783	-4.61416	3.94692e-06	2.14009e-05	16.9714	8.05971	47.433	21.4988	17970	NM_010877
Neu2	153.686	-1.12024	0.137246	-8.16222	3.28911e-16	1.11779e-14	94.318	22.0352	204.096	20.6138	23956	NM_001160163
Neurl3	33.7917	-1.77834	0.303483	-5.85976	4.63539e-09	4.62065e-08	12.8483	4.52896	45.4505	20.0988	214854	NM_153408
Nucks1	745.037	1.04089	0.0783047	13.2929	2.54685e-40	9.09819e-38	786.341	40.0337	378.691	33.2616	98415	NM_001145804
Olfml2b	113.989	-3.01655	0.232365	-12.9819	1.54893e-38	4.83236e-36	26.0858	8.67221	231.111	37.3495	320078	NM_177068
Pappa2	11.4373	-2.80077	0.507916	-5.51423	3.50308e-08	2.94854e-07	2.17116	1.86909	15.4258	2.04327	23850	NM_001085376
Pcp4l1	280.645	1.04558	0.157582	6.63516	3.24145e-11	4.76934e-10	266.115	39.3197	132.906	16.5206	66425	NM_025557
Pgap1	59.2886	-1.06218	0.231001	-4.59815	4.26259e-06	2.29183e-05	23.6178	4.73152	54.42	18.5404	241062	NM_001163314
Phlda3	1599.88	1.38819	0.127189	10.9144	9.83483e-28	1.29122e-25	1497	204.619	591.771	49.0615	27280	NM_013750
Pi15	28.4886	-3.12846	0.425782	-7.34757	2.01844e-13	4.33641e-12	3.88347	2.49582	41.9155	12.0491	94227	NM_053191
Pid1	110.917	-1.04289	0.20262	-5.14703	2.64642e-07	1.83529e-06	51.5682	18.0966	103.012	20.7627	98496	NM_001003948
Pla2g4a	25.8308	-1.75134	0.328226	-5.33578	9.5134e-08	7.28129e-07	7.85832	4.08498	29.0776	7.98167	18783	NM_001305632
Plcd4	750.172	-1.14141	0.112557	-10.1407	3.64542e-24	3.45663e-22	421.499	82.573	919.034	61.0995	18802	NM_001081456
Ppfia4	12.8284	-2.23635	0.387799	-5.76678	8.07987e-09	7.71859e-08	3.73588	1.14343	20.7054	5.26736	68507	NM_001144855
Ptpn18	35.733	-1.57196	0.305609	-5.14371	2.69362e-07	1.86298e-06	15.5176	5.20536	45.0905	23.5805	19253	NM_011206
Ptprc	171.157	-2.87714	0.5068	-5.67707	1.3702e-08	1.25209e-07	39.6139	10.2759	284.079	274.673	19264	NM_001111316
Pydc3	14.2765	-2.5816	0.473306	-5.45441	4.91363e-08	4.00514e-07	3.63884	2.86909	23.0885	14.4316	NA	NA
Pyhin1	27.9388	-2.82051	0.495027	-5.69768	1.21451e-08	1.12183e-07	7.40642	3.44785	48.0122	42.1343	NA	NA
Ralgps2	34.9224	-2.45169	0.464848	-5.27418	1.33351e-07	9.8718e-07	8.8341	6.84205	49.6801	31.0822	78255	NM_001159965
Rassf5	32.7988	-2.51759	0.415399	-6.06064	1.35579e-09	1.49507e-08	8.74849	3.88242	50.8923	38.1325	54354	NM_001311094
Rftn2	45.1719	-1.36362	0.235687	-5.78574	7.21932e-09	6.94401e-08	20.1706	6.44872	53.5475	11.5124	74013	NM_001356287
Rgl1	229.087	-1.14451	0.157888	-7.24889	4.20191e-13	8.54908e-12	96.5149	22.9679	234.766	34.2162	19731	NM_001346117
Rgs16	9.44574	-3.17036	0.459139	-6.90501	5.01998e-12	8.39999e-11	2.03023	1.22009	19.9134	1.1499	19734	NM_011267
Rnasel	61.6104	-1.33783	0.274087	-4.88105	1.05523e-06	6.50456e-06	20.833	10.5578	55.1336	14.9599	24014	NM_011882
Scarna6	7.16062	3.45893	0.709201	4.87722	1.07592e-06	6.60298e-06	18.9471	12.2567	1.43631	1.79007	100217415	NR_028519
Sctr	45.8731	1.36638	0.280091	4.87835	1.06976e-06	6.57567e-06	55.805	14.2538	20.7453	6.23729	319229	NM_001012322
Selp	23.7552	-2.30271	0.346458	-6.64642	3.00312e-11	4.45279e-10	6.4389	5.11831	32.3853	2.90346	20344	NM_011347
Sertad4	30.7622	-2.09797	0.341679	-6.14018	8.24297e-10	9.42115e-09	11.5516	5.47096	47.6724	12.6917	214791	NM_001177794
Slamf9	15.752	-1.86669	0.413394	-4.51553	6.31589e-06	3.26881e-05	4.4632	2.51835	21.1282	6.17165	98365	NM_029612
Snhg6	105.707	1.2765	0.217468	5.86985	4.36184e-09	4.37637e-08	105.614	19.3071	41.707	8.90697	73824	NR_024067
Soat1	44.86	-1.55476	0.252122	-6.1667	6.97314e-10	8.10246e-09	16.9478	7.20009	49.7535	11.3946	20652	NM_009230
Sp140	38.9425	-1.5141	0.276027	-5.48532	4.12733e-08	3.42332e-07	12.618	2.96763	39.2435	11.125	434484	NM_001013817
Spats2l	32.5816	-2.74791	0.307678	-8.93112	4.21709e-19	2.15929e-17	8.22526	4.94178	58.2541	4.31263	67198	NM_001164566
St8sia4	88.7131	-1.28601	0.208676	-6.16272	7.15075e-10	8.29628e-09	40.3049	8.05943	105.59	28.6116	20452	NM_001159745
Stau2	410.372	1.07641	0.0976455	11.0236	2.9393e-28	4.06761e-26	406.535	38.3412	190.63	23.535	29819	NM_001111272
Steap3	373.145	-1.29324	0.105481	-12.2605	1.47662e-34	3.48959e-32	180.156	14.5362	475.083	39.3746	68428	NM_001085409
Sulf1	225.586	-1.08191	0.174618	-6.19586	5.79672e-10	6.81293e-09	100.455	32.9449	217.111	39.6657	240725	NM_001198565
Tceb1	461.194	1.18968	0.146748	8.10692	5.19203e-16	1.70416e-14	482.422	32.0151	202.408	17.3542	NA	NA
Tfcp2l1	124.28	3.76623	0.398678	9.44679	3.49365e-21	2.43936e-19	120.962	24.0173	9.48429	4.38503	81879	NM_023755
Tmeff2	61.0154	-1.23336	0.209564	-5.88536	3.97185e-09	4.02452e-08	25.323	7.13983	54.8315	5.18111	56363	NM_019790
Tmem37	119.95	1.41522	0.162793	8.69342	3.51693e-18	1.56379e-16	134.682	42.5482	51.0993	4.18333	170706	NM_019432
Tnn	4.82362	-4.43558	0.994413	-4.4605	8.17693e-06	4.11014e-05	0.877795	0.885912	15.9674	14.5841	329278	NM_177839
Traf5	14.4509	-2.13416	0.387897	-5.50186	3.75799e-08	3.13731e-07	4.96302	3.30954	20.4119	3.7458	22033	NM_011633
Tuba4a	6252.27	1.09598	0.139741	7.84299	4.39958e-15	1.25152e-13	5220.86	277.697	2392.22	427.577	22145	NM_001313723
Ube2t	41.2538	1.37479	0.227508	6.04281	1.51455e-09	1.6606e-08	46.8206	7.44535	17.3289	3.78372	67196	NM_001278115
Ugt1a7c	7.75691	-3.00103	0.634597	-4.72903	2.25597e-06	1.2979e-05	1.48396	0.834196	10.925	6.39946	394432	NM_201642
Uhmk1	67.6717	-1.01252	0.207286	-4.88464	1.03617e-06	6.40249e-06	26.992	11.2379	56.2248	3.57208	16589	NM_001360809
Vash2	8.637	-2.45901	0.430276	-5.71496	1.09732e-08	1.02095e-07	3.0143	1.65475	17.6444	4.78107	226841	NM_144879
Zdbf2	9.9938	-3.23628	0.503068	-6.43309	1.25037e-10	1.68187e-09	1.69747	1.11414	21.8802	6.58924	73884	NM_001267872
Zranb3	85.5828	1.31462	0.167795	7.83467	4.70068e-15	1.32734e-13	76.3282	14.1933	30.7378	4.47936	226409	NM_001285945
2310039L15Rik	3.92244	4.44064	0.935368	4.74748	2.05964e-06	1.19525e-05	8.28451	5.64705	0.365843	0.441298	69629	NR_045337
Adamts14	12.7569	-1.90215	0.367791	-5.17182	2.31827e-07	1.63278e-06	5.71581	0.679944	22.4803	8.03767	237360	NM_001081127
Aldh1l2	34.451	-1.97527	0.278978	-7.08038	1.43765e-12	2.64792e-11	16.1187	10.4205	62.8675	14.5348	216188	NM_153543
Anapc16	358.339	1.08409	0.132656	8.17217	3.02899e-16	1.03627e-14	337.922	42.5413	153.379	3.26484	52717	NM_001347451
Apaf1	51.4989	-1.33135	0.228731	-5.82058	5.86438e-09	5.74673e-08	20.9636	7.8843	61.0429	15.2137	11783	NM_001042558
Arhgap9	19.4687	-2.78526	0.50065	-5.56329	2.64742e-08	2.29887e-07	4.68815	4.45141	33.0526	21.7137	216445	NM_001285785
Avil	50.1792	1.41544	0.292532	4.8386	1.3076e-06	7.8707e-06	51.4555	12.5165	17.7996	5.91539	11567	NM_009635
B4galnt1	44.5224	-2.47715	0.549775	-4.50576	6.61372e-06	3.4046e-05	13.2289	5.22539	69.2689	53.2493	14421	NM_001244617
Bicc1	125.079	-1.40569	0.154283	-9.11108	8.15687e-20	4.55628e-18	49.8402	13.4275	137.986	8.94886	83675	NM_001347189
Btbd11	13.0222	-1.73999	0.386011	-4.5076	6.55646e-06	3.38079e-05	5.13174	2.96065	16.453	2.87864	74007	NM_001017525
Cd24a	2553.48	1.15184	0.103993	11.0761	1.63919e-28	2.35323e-26	2197.8	148.565	950.019	116.444	12484	NM_009846
Cep85l	458.515	1.13437	0.196888	5.76148	8.3378e-09	7.94522e-08	416.608	57.243	186.706	41.7366	100038725	NM_001204983
Chst11	59.0574	-1.17464	0.259344	-4.52927	5.91891e-06	3.08547e-05	20.8007	6.04229	54.4846	8.74135	58250	NM_021439
Chst3	25.1278	-2.52714	0.49792	-5.07538	3.86715e-07	2.61343e-06	7.92516	2.55868	44.7224	30.9413	53374	NM_016803
Ckap4	88.302	-1.59332	0.22383	-7.11846	1.09141e-12	2.06976e-11	40.9519	17.889	133.419	19.2912	216197	NM_175451
Cnn2	181.867	-1.33718	0.198328	-6.74226	1.55941e-11	2.43684e-10	84.1372	9.66074	226.117	89.3408	12798	NM_007725
Col18a1	213.115	-1.40262	0.194223	-7.22171	5.1339e-13	1.02685e-11	97.1006	38.1763	276.392	23.1226	12822	NM_001109991
Col6a1	1314.83	-2.14983	0.172197	-12.4847	9.05143e-36	2.43928e-33	467.886	91.2456	2095.23	194.905	12833	NM_009933
Col6a2	1132.87	-2.26524	0.196257	-11.5422	8.08271e-31	1.41089e-28	378.278	93.8898	1847.25	239.608	12834	NM_001347207
Csrp2	67.3276	-1.2328	0.182136	-6.76856	1.30067e-11	2.064e-10	33.7267	5.30288	80.7416	10.3539	13008	NM_007792
Dram1	131.52	-1.03515	0.22138	-4.67592	2.92632e-06	1.64876e-05	60.1707	22.4212	116.392	16.3365	71712	NM_027878
Dse	121.683	-2.01145	0.185759	-10.8283	2.52825e-27	3.18332e-25	38.6444	17.1025	149.698	27.1992	212898	NM_172508
Enpp1	33.7743	-1.57794	0.249717	-6.31891	2.63414e-10	3.33853e-09	12.5365	4.5885	42.7257	6.82887	18605	NM_001308327
Enpp3	44.4502	-2.18179	0.369735	-5.90095	3.61418e-09	3.68886e-08	11.5759	6.35503	56.1386	4.64726	209558	NM_134005
Epb4.1l2	638.282	-1.16053	0.108201	-10.7256	7.71583e-27	9.40657e-25	296.031	52.3374	662.152	24.7283	NA	NA
Frk	12.6519	-2.37777	0.510376	-4.65886	3.17965e-06	1.77223e-05	3.03618	2.56504	18.1744	7.17091	14302	NM_001159544
Glt8d2	30.0562	-2.78906	0.312828	-8.91562	4.85082e-19	2.44307e-17	6.74306	3.8612	46.7103	10.4542	74782	NM_029102
Hebp2	9.49176	-4.05796	0.730354	-5.55615	2.7579e-08	2.37151e-07	0.73091	0.780644	14.753	5.37372	56016	NM_019487
Igf1	348.885	-2.33547	0.16593	-14.0751	5.40386e-45	3.0744e-42	114.272	35.9596	575.723	93.7079	16000	NM_001111274
Itgb2	95.908	-2.18913	0.310424	-7.05206	1.76284e-12	3.19704e-11	24.4271	15.6156	123.457	60.1671	16414	NM_008404
Kera	81.7324	-7.77541	0.605877	-12.8333	1.06696e-37	3.15183e-35	1.24707	1.5365	226.597	38.0599	16545	NM_008438
L3mbtl3	48.2734	-1.01916	0.220172	-4.62891	3.67589e-06	2.00944e-05	25.0809	10.2957	48.4211	6.27192	237339	NM_001347467
Lama2	740.912	-1.08513	0.137034	-7.91871	2.39981e-15	7.19988e-14	372.065	55.2119	800.39	85.6634	16773	NM_008481
Lama4	529.082	-1.37683	0.126336	-10.8981	1.17639e-27	1.53141e-25	226.357	51.1779	610.733	66.7032	16775	NM_010681
Lingo3	82.1793	-1.86932	0.198509	-9.41683	4.64904e-21	3.17395e-19	36.0934	3.23889	140.852	17.845	237403	NM_001013758
Lrig3	45.7722	-1.00691	0.226946	-4.43678	9.13125e-06	4.54963e-05	20.9042	5.10335	44.3356	9.18412	320398	NM_177152
Lss	30.286	-1.74616	0.261152	-6.68638	2.2876e-11	3.45185e-10	14.0337	4.53358	48.6404	12.4542	16987	NM_146006
Lum	663.402	-1.75499	0.141386	-12.4127	2.22894e-35	5.52237e-33	247.132	42.9187	804.718	159.281	17022	NM_008524
Lyz1	124.478	-1.89652	0.278886	-6.80034	1.04375e-11	1.67885e-10	37.1202	16.2343	152.358	42.2014	17110	NM_013590
Lyz2	1408.49	-1.3802	0.189252	-7.29291	3.03323e-13	6.30493e-12	468.079	130.476	1282.55	441.894	17105	NM_017372
Man1a	294.294	-1.17196	0.160665	-7.29445	2.99871e-13	6.24163e-12	120.822	26.7491	276.005	71.5932	17155	NM_008548
Mfsd12	27.8134	-1.81716	0.296951	-6.1194	9.39291e-10	1.06404e-08	10.0044	5.8836	37.0972	5.78469	73822	NM_028657
Mical1	68.6135	-1.12018	0.212847	-5.26282	1.41859e-07	1.04764e-06	36.4846	10.5869	84.3215	17.0198	171580	NM_001164433
Mmp19	56.8328	-1.37289	0.253481	-5.41617	6.08882e-08	4.87137e-07	24.5612	12.9089	65.6298	8.34391	58223	NM_001164197
Myf6	856.562	1.32151	0.141587	9.33351	1.02423e-20	6.55547e-19	921.312	184.655	375.047	26.9718	17878	NM_008657
Ncoa7	37.7916	-1.96567	0.298182	-6.59218	4.33429e-11	6.28104e-10	10.3006	2.26243	45.072	6.84002	211329	NM_001111267
Ntn4	100.894	-1.14823	0.141927	-8.09026	5.95351e-16	1.94165e-14	40.7658	10.3672	90.7605	6.40409	57764	NM_021320
Oaz1	220.639	1.45505	0.164333	8.85432	8.41949e-19	4.10577e-17	217.615	35.5479	74.2657	6.87964	18245	NM_001301034
Odf3l2	377.091	4.82365	0.465488	10.3626	3.67025e-25	3.75858e-23	331.762	115.747	11.2402	6.40667	382384	NM_001033473
Pfkl	215.375	-1.07717	0.137824	-7.81554	5.47276e-15	1.52572e-13	110.949	6.17886	243.617	32.3195	18641	NM_001358793
Plagl1	52.4362	-2.36295	0.32097	-7.36189	1.81321e-13	3.93956e-12	14.6139	8.16379	74.4485	17.2336	22634	NM_001364643
Plxnc1	30.0669	-2.00758	0.377737	-5.31476	1.068e-07	8.07754e-07	10.6415	2.46286	39.6249	24.4087	54712	NM_018797
Ptbp1	356.009	-1.02746	0.136297	-7.53844	4.7564e-14	1.1506e-12	175.622	33.0793	365.384	65.0881	19205	NM_001077363
Rab32	36.335	-2.0462	0.317845	-6.43772	1.21278e-10	1.63416e-09	11.7497	4.17767	44.8413	11.8181	67844	NM_026405
Rpl41	2353.44	1.02488	0.165351	6.1982	5.71123e-10	6.72942e-09	2170.64	275.45	1010.69	104.157	67945	NM_018860
Rwdd1	513.594	1.13206	0.150434	7.52529	5.26037e-14	1.26455e-12	513.265	52.5681	223.532	18.8422	66521	NM_025614
Scml4	9.19567	-3.04704	0.587167	-5.1894	2.10976e-07	1.49967e-06	2.14737	0.866412	19.4302	10.385	268297	NM_001359264
Slc16a7	16.8519	-2.02742	0.393043	-5.15828	2.49235e-07	1.74023e-06	3.78327	2.95377	15.0279	2.38152	20503	NM_001358496
Slc29a3	73.9324	-1.64487	0.23758	-6.92346	4.40755e-12	7.48115e-11	21.8424	7.58758	76.7424	3.27794	71279	NM_023596
Sowahc	74.6648	-1.20608	0.24098	-5.00489	5.58951e-07	3.64898e-06	30.9988	11.6161	66.91	9.56042	268301	NM_172939
Srgap1	22.9955	-1.92134	0.282621	-6.79831	1.05855e-11	1.69914e-10	8.42178	3.4154	31.2972	4.3189	117600	NM_001081037
Tet1	25.0139	-3.03641	0.369101	-8.22649	1.92778e-16	6.71489e-15	6.89336	2.18107	58.0217	16.1475	52463	NM_001253857
Timm13	442.208	1.03118	0.151384	6.8117	9.64538e-12	1.5547e-10	452.998	59.875	218.951	23.8861	30055	NM_013895
Tnfaip3	68.4114	-1.70354	0.259428	-6.56651	5.15084e-11	7.38767e-10	25.7014	8.48392	92.5132	28.8548	21929	NM_001166402
Tpd52l1	243.413	1.08506	0.133716	8.11469	4.87034e-16	1.61584e-14	241.69	31.9898	111.731	13.5235	21987	NM_001359364
Trhde	12.5843	-2.031	0.448418	-4.52925	5.91946e-06	3.08547e-05	3.8241	2.6039	13.5953	2.3594	237553	NM_146241
Ube2g2	847.534	1.14513	0.0940721	12.1729	4.33174e-34	9.93131e-32	838.417	80.1106	382.399	29.1776	22213	NM_019803
Unc5b	69.5659	-1.23653	0.230032	-5.37548	7.63801e-08	5.95571e-07	43.8611	11.6488	99.5848	34.6128	107449	NM_001359273
Ust	48.7448	-1.31074	0.24055	-5.44895	5.06694e-08	4.11599e-07	16.163	7.96086	45.4864	6.9975	338362	NM_177387
Wif1	18.5286	-5.42447	0.615464	-8.81363	1.21155e-18	5.76178e-17	1.27567	1.33348	44.4065	6.17251	24117	NM_011915
0610009B22Rik	186.739	1.04858	0.136513	7.68118	1.57624e-14	4.07619e-13	184.147	19.6004	88.2643	8.96603	66050	NM_025319
1100001G20Rik	13.0031	-2.61954	0.544235	-4.81325	1.48494e-06	8.84802e-06	2.1857	2.40242	17.7429	7.35579	NA	NA
1110035M17Rik	10.6398	2.64101	0.489176	5.3989	6.70509e-08	5.32008e-07	14.9265	6.0564	2.27188	1.52122	NA	NA
1810043H04Rik	139.885	1.0917	0.202471	5.3919	6.97176e-08	5.49478e-07	152.353	24.6781	65.9677	7.35963	NA	NA
2810008D09Rik	31.0038	1.18344	0.259568	4.55925	5.13357e-06	2.71172e-05	40.4482	16.4878	17.408	3.57432	NA	NA
Abca9	335.452	-1.30435	0.140064	-9.31254	1.24816e-20	7.82571e-19	127.461	28.6087	325.548	36.0973	217262	NM_147220
Acaca	987.199	-3.21642	0.305718	-10.5209	6.92204e-26	7.5411e-24	210.211	80.3529	1915.63	484.646	107476	NM_133360
Ace	814.307	-1.06571	0.119179	-8.9421	3.81837e-19	1.97488e-17	350.586	54.279	770.872	44.207	11421	NM_001281819
Acly	1188.16	-4.04713	0.252054	-16.0566	5.13738e-58	6.0704e-55	181.063	51.782	3018.03	1051.86	104112	NM_001199296
Acsf2	69.0285	-1.19661	0.21671	-5.52172	3.35704e-08	2.84119e-07	30.7266	13.4971	74.9752	6.00517	264895	NM_153807
Acyp2	898.768	1.45704	0.161677	9.01204	2.02254e-19	1.07132e-17	855.258	107.765	295.852	14.7702	75572	NM_029344
Adam19	99.7529	-1.69836	0.227285	-7.47237	7.87618e-14	1.81934e-12	42.3106	16.5498	140.53	33.947	11492	NM_001291890
Adamts2	235.964	-2.45264	0.178747	-13.7212	7.57589e-43	3.23259e-40	69.029	20.9084	385.114	47.9733	216725	NM_001277305
Adcy1	26.3933	-1.48814	0.279421	-5.32581	1.00504e-07	7.64655e-07	12.0697	2.66815	31.3439	9.61149	432530	NM_009622
Arhgap44	114.771	1.04506	0.165484	6.31519	2.69826e-10	3.40295e-09	105.553	20.4017	53.4185	12.047	216831	NM_001099288
Atp5g1	3011.29	1.21215	0.15147	8.00254	1.21876e-15	3.8129e-14	3117.97	287.275	1310.87	139.784	11951	NM_001161419
C1qtnf1	268.735	-1.38858	0.133928	-10.3682	3.46154e-25	3.56864e-23	120.065	21.2428	325.967	30.228	56745	NM_001204129
C1qtnf2	31.4645	-2.60246	0.299366	-8.69324	3.52237e-18	1.56379e-16	9.16126	4.82276	64.7653	10.4469	69183	NM_026979
Cacna1g	30.4097	-1.49754	0.30121	-4.97175	6.63511e-07	4.26095e-06	13.912	6.51015	43.949	9.80495	12291	NM_001112813
Camk2b	1198.94	1.36525	0.138337	9.86906	5.66947e-23	4.7075e-21	1143.84	167.744	446.55	99.4675	12323	NM_001174053
Ccdc69	39.301	-1.21237	0.227533	-5.32831	9.91289e-08	7.55692e-07	22.4138	8.50927	56.976	8.46646	52570	NM_177471
Ccdc88a	66.0339	-1.42147	0.228113	-6.23144	4.6218e-10	5.56391e-09	29.9951	12.2179	86.3403	16.0002	108686	NM_001363368
Cd68	67.8242	-1.87957	0.288708	-6.51028	7.5013e-11	1.05327e-09	20.3777	7.63431	80.3384	19.9777	12514	NM_001291058
Cdr2l	30.5743	-1.44659	0.271816	-5.32195	1.0266e-07	7.78747e-07	14.1251	4.37685	43.5036	14.0049	237988	NM_001080929
Chad	96.1894	-3.77253	0.501116	-7.52826	5.14216e-14	1.23807e-12	13.4435	9.01963	159.093	57.9632	12643	NM_007689
Chd3	260.957	-1.43868	0.192076	-7.49019	6.87763e-14	1.60803e-12	115.459	34.1235	305.73	65.0438	216848	NM_146019
Clec10a	108.887	-1.3316	0.258933	-5.14266	2.70882e-07	1.87265e-06	42.876	5.61215	115.313	21.846	17312	NM_001204252
Cnrip1	26.4613	-1.07441	0.220737	-4.86738	1.1309e-06	6.90728e-06	14.8035	2.99947	30.3692	3.20481	380686	NM_029861
Col1a1	2659.1	-3.4655	0.289086	-11.9878	4.1173e-33	8.66382e-31	605.091	237.052	6830.8	2195.57	12842	NM_007742
Doc2b	32.7856	2.60668	0.41633	6.26108	3.82313e-10	4.67572e-09	25.6112	10.206	4.63125	1.92855	13447	NM_007873
Dock2	65.2946	-2.68289	0.506337	-5.29864	1.1667e-07	8.73854e-07	15.5076	14.7253	93.9827	54.3852	94176	NM_033374
Dusp14	38.0297	-1.38614	0.20874	-6.6405	3.12616e-11	4.61296e-10	22.0012	6.09932	61.0335	7.15314	56405	NM_019819
Dusp18	160.642	2.08716	0.178947	11.6635	1.95771e-31	3.53793e-29	184.64	33.0636	44.2239	2.55602	75219	NM_173745
Eif1	4014.13	1.15684	0.123935	9.33423	1.01729e-20	6.55547e-19	3705.19	439.993	1611.92	128.88	20918	NM_011508
Engase	71.2973	-1.05364	0.202223	-5.21027	1.88567e-07	1.35544e-06	41.7497	10.0958	89.348	18.246	217364	NM_001359368
Fam117a	57.9231	-1.35366	0.172681	-7.83903	4.54025e-15	1.28677e-13	28.6705	5.88825	73.8012	11.2848	215512	NM_172543
Fam83g	21.2962	2.49282	0.38273	6.51327	7.35307e-11	1.0334e-09	21.5962	6.51859	4.20544	1.50453	69640	NM_178618
Fasn	6107.64	-3.50983	0.491107	-7.14678	8.88368e-13	1.71366e-11	1235.98	983.988	13185.4	3306.12	14104	NM_007988
Fgf18	7.22945	-2.74263	0.58706	-4.6718	2.98572e-06	1.67875e-05	2.1647	0.92269	15.5625	7.02706	14172	NM_008005
Fkbp10	72.2734	-2.28338	0.232827	-9.80723	1.04809e-22	8.38523e-21	25.3499	5.3443	124.694	20.3183	14230	NM_001163481
Galnt10	123.704	-1.06511	0.166101	-6.41244	1.43208e-10	1.90791e-09	69.3428	18.9722	146.134	14.8035	171212	NM_134189
Gas7	356.949	-1.46621	0.147767	-9.92245	3.32504e-23	2.82187e-21	159.392	47.2629	450.614	47.9955	14457	NM_001109657
Gm16062	71.2727	1.42239	0.265688	5.35362	8.62133e-08	6.63156e-07	69.2388	12.1842	24.1604	5.59999	100504104	NR_045686
Gm5431	6.84236	-3.06747	0.674201	-4.54979	5.36998e-06	2.82397e-05	0.738952	0.423195	8.64826	2.60369	432555	NM_001024230
Gprc5c	354.029	-1.52942	0.153038	-9.99374	1.62336e-23	1.45827e-21	185.265	32.5886	553.81	65.4887	70355	NM_001110337
Guk1	261.884	1.16097	0.138745	8.36765	5.87801e-17	2.22395e-15	254.108	37.6087	110.178	6.61838	14923	NM_001159410
Hic1	128.016	-1.1374	0.222352	-5.11532	3.13206e-07	2.14401e-06	81.107	30.3631	177.105	41.689	15248	NM_001098203
Ikzf1	52.1866	-2.44904	0.529544	-4.6248	3.74965e-06	2.04467e-05	16.0558	8.65551	81.6189	55.9978	22778	NM_001025597
Itgb3	52.6921	-1.45457	0.315632	-4.60843	4.05718e-06	2.19059e-05	25.5034	17.2386	68.2826	20.1711	16416	NM_016780
Kctd11	38.1352	-1.28873	0.210686	-6.11683	9.5455e-10	1.07736e-08	20.4678	8.33132	47.2429	3.86603	216858	NM_153143
Krt14	20.7897	-3.18796	0.573068	-5.56296	2.65235e-08	2.30185e-07	3.13523	1.90834	34.4304	20.3517	16664	NM_001313956
Krt17	9.17902	-4.04259	0.812512	-4.97542	6.51066e-07	4.19778e-06	0.956566	1.13259	12.3823	4.88119	16667	NM_010663
Krt19	42.8897	-3.13548	0.704961	-4.44773	8.67806e-06	4.33649e-05	6.6487	8.33328	50.6459	25.307	16669	NM_001313963
Krt222	18.472	-2.48183	0.461976	-5.37221	7.7777e-08	6.04316e-07	6.40436	3.90756	34.5243	9.55081	268481	NM_001361584
Lasp1	413.56	-1.03455	0.138268	-7.48225	7.30599e-14	1.69784e-12	215.079	52.7753	434.878	54.3751	16796	NM_010688
Lcp2	29.5724	-1.8864	0.383625	-4.91731	8.77423e-07	5.49677e-06	10.7782	5.7458	38.9821	25.0988	16822	NM_010696
Lgals3bp	347.676	-1.3499	0.185407	-7.28073	3.32017e-13	6.85498e-12	142.684	33.2335	372.222	38.2807	19039	NM_011150
Ltc4s	32.5123	-1.233	0.277276	-4.44683	8.71472e-06	4.35339e-05	17.4953	8.54619	38.2793	4.17019	17001	NM_001313968
Meox1	44.1443	-1.27091	0.25595	-4.96546	6.85394e-07	4.3868e-06	22.0216	9.73004	52.0774	7.91237	17285	NM_010791
Mfap4	93.2745	-3.02808	0.278862	-10.8587	1.81253e-27	2.30101e-25	22.6241	10.9462	190.067	47.369	76293	NM_001347545
Mgl2	100.603	-1.62439	0.252274	-6.43899	1.20275e-10	1.62207e-09	33.2607	14.3314	104.897	22.4981	216864	NM_145137
Mrc2	192.279	-1.80458	0.19605	-9.20469	3.42658e-20	2.02445e-18	79.6114	23.4528	299.43	51.2717	17534	NM_008626
Mrps24	389.634	1.24144	0.158176	7.84848	4.21114e-15	1.20685e-13	422.592	57.698	171.068	19.36	64660	NM_001362871
Mxra7	99.9531	-1.45614	0.169385	-8.59664	8.20814e-18	3.51212e-16	45.5816	4.96633	127.502	6.54813	67622	NM_001347633
Myo1g	42.9106	-1.72412	0.35866	-4.8071	1.53133e-06	9.10676e-06	18.7202	4.21794	60.5637	35.5357	246177	NM_178440
Nme2	2458.26	1.37256	0.162674	8.43749	3.24215e-17	1.27373e-15	2382.14	303.901	894.029	71.977	18103	NM_001077529
Nos2	35.6667	-1.35469	0.297308	-4.55651	5.201e-06	2.74262e-05	15.4778	7.45184	42.7999	9.47521	18126	NM_001313921
Pdlim4	79.1358	-1.16667	0.187306	-6.2287	4.70336e-10	5.64881e-09	39.4849	10.6493	91.4869	9.38307	30794	NM_019417
Pmp22	996.764	-1.29699	0.131831	-9.83823	7.70554e-23	6.32967e-21	520.697	46.1239	1290.27	241.044	18858	NM_001302255
Rab34	86.7966	-1.17943	0.181052	-6.51433	7.30165e-11	1.02805e-09	38.6535	6.01597	88.0031	8.41784	19376	NM_001159482
Rnf145	183.538	-1.34258	0.14457	-9.28674	1.5908e-20	9.69694e-19	87.8522	8.52378	225.699	42.0793	74315	NM_001166553
Rpl27	878.79	1.03622	0.133841	7.74219	9.77211e-15	2.60155e-13	601.853	76.3735	283.985	35.7268	19942	NM_011289
Rpl38	1165.56	1.02505	0.15474	6.62433	3.48829e-11	5.1032e-10	1002.26	167.174	469.741	62.7243	67671	NM_001048057
Sec24a	481.235	1.08118	0.13223	8.1765	2.92199e-16	1.00413e-14	451.797	38.6112	210.703	32.6518	77371	NM_001290785
2021-09-09	233.278	-1.1116	0.150089	-7.40628	1.29894e-13	2.90016e-12	118.706	13.9705	268.363	44.8218	NA	NA
Serpinf1	838.435	-2.21972	0.158702	-13.9868	1.87724e-44	1.02986e-41	247.364	68.9873	1139.76	82.7905	20317	NM_011340
Sgsh	61.6676	-1.03734	0.202248	-5.12906	2.91193e-07	2.00135e-06	28.0985	10.8222	62.6717	8.48333	27029	NM_018822
Sh3pxd2b	119.67	-1.39859	0.201294	-6.948	3.70488e-12	6.35874e-11	48.7453	19.4968	127.423	16.7665	268396	NM_177364
Slc16a6	41.4065	-1.548	0.207729	-7.45202	9.19195e-14	2.11058e-12	20.2463	2.51557	60.5008	12.1543	104681	NM_001029842
Slc25a10	224.968	-1.91095	0.221833	-8.61438	7.03226e-18	3.04289e-16	89.2944	33.5187	335.118	17.968	27376	NM_013770
Slc25a35	51.4711	-1.72219	0.199326	-8.6401	5.61663e-18	2.47212e-16	24.2551	8.56437	79.6886	13.6787	71998	NM_028048
Slc35e4	418.706	1.00405	0.147167	6.82249	8.94737e-12	1.44827e-10	369.885	60.1825	187.814	30.4941	103710	NM_153142
Slc36a2	148.131	-1.70776	0.329641	-5.18068	2.21079e-07	1.5657e-06	59.6767	36.2147	181.688	24.0219	246049	NM_153170
Slc46a1	11.1294	-1.85931	0.4061	-4.57846	4.68403e-06	2.49831e-05	3.96609	1.67361	15.188	4.5548	52466	NM_026740
Slfn1	9.04497	-3.82556	0.812602	-4.70779	2.50413e-06	1.42996e-05	1.66705	1.34904	19.4469	18.6943	20555	NM_011407
Slfn2	72.1204	-1.75604	0.330546	-5.31252	1.08117e-07	8.16914e-07	26.3969	6.75207	92.1316	44.4841	20556	NM_011408
Sparc	4857.58	-2.05508	0.111808	-18.3805	1.88138e-75	3.61249e-72	1709.31	230.458	7262.88	846.204	20692	NM_001290817
Specc1	30.5955	-1.4596	0.239955	-6.08281	1.18092e-09	1.31595e-08	11.8698	4.25555	34.0109	8.04127	432572	NM_001029936
Srebf1	660.942	-1.55228	0.132575	-11.7087	1.15028e-31	2.23664e-29	336.536	37.0246	968.912	60.3958	20787	NM_001313979
Stk10	108.829	-1.52073	0.202097	-7.52474	5.28244e-14	1.26767e-12	45.0241	4.03631	140.147	45.2136	20868	NM_001359177
Tcap	14932.9	1.06357	0.130173	8.17045	3.07229e-16	1.04642e-14	14209.3	2151.95	6759.19	910.25	21393	NM_011540
Tcf7	25.777	-3.82272	0.843263	-4.53325	5.80844e-06	3.03172e-05	3.14173	2.1215	58.6664	67.1755	21414	NM_001313981
Tekt1	10.2655	2.53203	0.455721	5.55609	2.75886e-08	2.37151e-07	13.5987	7.5224	2.66763	0.979153	21689	NM_001282006
Timp2	2103.03	-1.02268	0.103389	-9.89163	4.52599e-23	3.77846e-21	882.527	122.378	1829.02	58.3944	21858	NM_011594
Tlcd1	22.2115	-1.84115	0.291241	-6.32173	2.58646e-10	3.28353e-09	9.54256	3.91416	36.1996	4.03894	68385	NM_001291235
Tlcd2	14.3858	-2.77581	0.399543	-6.94745	3.71946e-12	6.37663e-11	3.83613	2.65592	28.1102	6.39955	380712	NM_001291156
Tmem106a	64.4889	-1.18102	0.221785	-5.32505	1.00925e-07	7.67482e-07	30.7181	15.2186	68.3749	9.00812	217203	NM_001359325
Tmem97	23.8503	-1.98019	0.320491	-6.17863	6.46599e-10	7.54742e-09	10.2528	5.70907	37.5945	10.823	69071	NM_133706
Top2a	25.8556	-2.50834	0.531693	-4.71765	2.38584e-06	1.36801e-05	6.51544	3.69755	36.8696	20.552	21973	NM_011623
Traf4	46.9717	-1.42647	0.239085	-5.96636	2.42599e-09	2.55419e-08	25.0633	7.2671	64.5454	12.387	22032	NM_009423
Ttyh2	152.072	-1.2424	0.130213	-9.5413	1.41059e-21	1.01253e-19	86.2971	18.4793	209.641	10.9896	117160	NM_053273
Ube2b	4261.95	1.09184	0.120114	9.09005	9.89971e-20	5.47013e-18	3961.46	391.296	1790.87	171.854	22210	NM_001362685
Ubtd2	98.9752	-1.01464	0.138198	-7.34197	2.10477e-13	4.49046e-12	61.6911	11.6136	119.598	16.2948	327900	NM_001361561
Ugp2	5057.73	1.05187	0.126674	8.30378	1.00854e-16	3.67984e-15	4622.01	698.998	2192.74	249.238	216558	NM_001290634
Unc119	49.0274	-1.00321	0.204774	-4.89913	9.62606e-07	5.98405e-06	30.676	5.48285	65.1483	4.94724	22248	NM_001313985
Uqcr10	2263.84	1.20193	0.144948	8.29212	1.11244e-16	4.03024e-15	2240.95	314.069	928.871	51.5979	66152	NM_001047158
Uqcrq	2844.08	1.01738	0.151446	6.71778	1.84511e-11	2.8371e-10	2937.55	423.825	1376.38	83.7469	22272	NM_001326614
Wfdc17	29.1987	-2.22278	0.428939	-5.18203	2.19485e-07	1.55513e-06	6.75214	4.86113	30.5925	13.4166	100034251	NM_001081957
Zswim7	190.931	1.30106	0.156678	8.30403	1.00641e-16	3.67984e-15	208.312	22.4871	81.3263	1.66286	69747	NM_027198
2010107E04Rik	1190.37	1.13027	0.169478	6.66911	2.57356e-11	3.84558e-10	1241.95	236.699	540.599	41.3473	NA	NA
A530016L24Rik	141.029	-2.00834	0.253379	-7.92621	2.25933e-15	6.7917e-14	50.1063	20.3381	197.212	39.2353	319942	NM_177039
Acot2	266.342	2.73616	0.172031	15.9051	5.84076e-57	5.60749e-54	257.028	38.9939	38.9641	5.87869	171210	NM_134188
Adcy3	45.2442	-1.59659	0.288731	-5.52967	3.20835e-08	2.73038e-07	14.9423	7.55241	45.4379	13.2575	104111	NM_001159536
Ankrd9	1674.96	1.13449	0.13395	8.46956	2.46324e-17	9.85359e-16	1490.97	144.067	679.539	127.637	74251	NM_001361916
Ap4s1	375.322	1.11385	0.124387	8.95469	3.40702e-19	1.77408e-17	397.975	33.897	176.028	4.55562	11782	NM_001329698
Asb2	6854.58	1.08062	0.137324	7.86915	3.57062e-15	1.03879e-13	4921.34	619.202	2360.16	507.107	65256	NM_001374764
Aspg	11.3856	-3.86093	0.771598	-5.00381	5.62084e-07	3.66476e-06	1.84365	2.18765	23.8166	12.6706	104816	NM_001081169
Bcl11b	8.33682	-3.94319	0.870451	-4.53005	5.89685e-06	3.07577e-05	1.07044	0.754114	13.8577	11.1857	58208	NM_001079883
Ccdc88c	350.842	-1.39127	0.111926	-12.4304	1.78848e-35	4.50374e-33	185.283	18.4427	495.846	14.653	68339	NM_001362342
Ccnk	892.463	1.06343	0.140871	7.54895	4.3878e-14	1.06647e-12	800.969	85.455	372.31	74.8507	12454	NM_009832
Clec14a	116.087	-1.13186	0.159687	-7.08796	1.36098e-12	2.5188e-11	56.5777	19.3749	131.91	10.2576	66864	NM_025809
Cmpk2	47.215	-1.26652	0.273877	-4.62439	3.75699e-06	2.04722e-05	23.9227	13.5808	53.4666	4.90421	22169	NM_020557
Dio2	25.1219	-2.27505	0.454117	-5.00984	5.44763e-07	3.56545e-06	6.80853	3.08508	32.4847	8.535	13371	NM_010050
Dlk1	17.1448	-2.10583	0.425556	-4.94842	7.48176e-07	4.75693e-06	4.76579	4.947	22.7982	8.19961	13386	NM_001190703
Dnmt3a	466.794	-1.33595	0.116755	-11.4423	2.56919e-30	4.38503e-28	244.526	34.1076	651.475	75.2425	13435	NM_001271753
Egln3	449.225	1.17815	0.181862	6.47827	9.27781e-11	1.28393e-09	470.394	66.5515	208.204	18.4585	112407	NM_028133
Esrrb	55.0202	1.22203	0.270685	4.51458	6.34437e-06	3.28245e-05	51.5699	8.52641	23.331	7.75886	26380	NM_001159500
Evl	48.0917	-1.8855	0.273903	-6.8838	5.82754e-12	9.66704e-11	17.1716	4.60983	68.0563	17.6582	14026	NM_001163394
Fam49a	78.4349	-1.35595	0.248124	-5.4648	4.63425e-08	3.79258e-07	31.9718	14.3325	82.6702	19.9703	NA	NA
Flrt2	118.995	-1.42094	0.17883	-7.94573	1.93049e-15	5.83745e-14	48.6359	15.5212	131.349	13.9133	399558	NM_201518
Gtf2a1	235.188	1.08054	0.144137	7.49661	6.54877e-14	1.54288e-12	252.516	26.8503	120.56	17.11	83602	NM_031391
Hdac9	60.3992	-1.31806	0.20408	-6.45854	1.05717e-10	1.44093e-09	31.3487	11.8606	81.7375	17.4852	79221	NM_001271386
Lamb1	580.781	-1.452	0.132541	-10.9551	6.28408e-28	8.32153e-26	243.032	41.3246	678.476	89.3856	16777	NM_008482
Meg3	190.508	-1.25193	0.232303	-5.38919	7.07748e-08	5.56668e-07	120.209	23.7051	279.204	54.7898	17263	NM_144513
Otub2	142.525	1.39128	0.176528	7.88135	3.23858e-15	9.49385e-14	124.942	18.8617	47.4991	9.74241	68149	NM_001177841
Papln	35.4861	-1.39223	0.300616	-4.63124	3.63481e-06	1.98982e-05	13.9887	2.00497	43.8021	11.6989	170721	NM_001205343
Pik3cg	35.4423	-2.28436	0.370803	-6.16057	7.24851e-10	8.39701e-09	10.1396	5.25456	47.0295	23.5388	30955	NM_001146200
Pld4	94.48	-1.42662	0.205396	-6.94572	3.76537e-12	6.44815e-11	40.1419	8.0755	112.026	31.5423	104759	NM_178911
Plekhh1	21.3318	2.81446	0.379743	7.4115	1.24875e-13	2.79621e-12	22.7305	8.63183	3.57098	1.19753	211945	NM_181073
Pqlc3	42.5311	-1.39675	0.267933	-5.21305	1.85763e-07	1.3403e-06	16.6426	10.4164	44.3643	7.13013	217430	NM_001161111
Pxdn	542.607	-1.35081	0.194125	-6.95847	3.43985e-12	5.91707e-11	229.752	49.6159	632.801	98.1252	69675	NM_181395
Pygl	208.77	-3.43358	0.262452	-13.0827	4.13701e-39	1.3521e-36	42.3353	23.1786	427.743	92.8282	110095	NM_133198
Rapgef5	63.0826	-1.49891	0.188463	-7.95331	1.81595e-15	5.51282e-14	21.3259	6.53212	61.5016	11.201	217944	NM_001373989
Rian	202.731	-2.18032	0.237355	-9.18591	4.08056e-20	2.36301e-18	91.544	25.9219	393.956	105.246	75745	NR_028261
Rps29	1977.07	1.37333	0.150161	9.14572	5.92355e-20	3.37006e-18	1619.36	205.966	598.463	68.0017	20090	NM_009093
Scarna13	23.4744	1.79679	0.32186	5.58252	2.37058e-08	2.07608e-07	36.2195	12.186	10.1521	2.10102	100306943	NR_028576
Sdc1	82.5983	-1.39168	0.19465	-7.14963	8.70099e-13	1.68121e-11	38.4183	11.8031	103.949	16.1034	20969	NM_011519
Serpina1b	7.82661	-4.56882	0.999754	-4.56994	4.87862e-06	2.58951e-05	0.560372	0.838392	17.3929	24.0671	20701	NM_009244
Serpina1c	4.98967	-6.3884	1.26184	-5.06276	4.1324e-07	2.78046e-06	0	0	13.7834	19.6315	20702	NM_009245
Serpina1d	4.51567	-5.36944	1.21294	-4.4268	9.5642e-06	4.74227e-05	0	0	9.51297	15.2284	20703	NM_009246
Serpina3c	67.2889	-1.61472	0.269778	-5.98537	2.15892e-09	2.29981e-08	21.9132	13.34	65.1784	4.42431	16625	NM_008458
Serpina3j	7.98921	-6.40877	1.13375	-5.65272	1.57924e-08	1.42531e-07	0	0	13.9738	10.6456	238395	NM_001101472
Serpina3k	13.1075	-7.50315	1.48914	-5.03859	4.68982e-07	3.11189e-06	0.184638	0.412862	41.5395	76.5044	20714	NM_011458
Slirp	301.736	1.31682	0.147917	8.90244	5.46344e-19	2.73368e-17	319.75	44.2549	121.75	17.0955	380773	NM_026958
Tmed8	61.7268	-1.4318	0.225429	-6.35146	2.13277e-10	2.73925e-09	23.0919	7.64481	65.4321	11.1578	382620	NM_001033475
Tmem179	44.28	-2.13252	0.344468	-6.19076	5.98738e-10	7.02077e-09	16.3888	9.19117	63.5629	11.4048	104885	NM_178915
Tmem229b	80.7549	-1.24782	0.209284	-5.96233	2.48671e-09	2.60917e-08	41.6943	11.8841	104.737	26.1711	268567	NM_001170401
Tnfaip2	345.374	-1.71857	0.173541	-9.90295	4.04172e-23	3.39261e-21	187.95	10.4281	614.385	87.0218	21928	NM_009396
Twist1	34.3811	-1.4016	0.254167	-5.51448	3.49811e-08	2.94758e-07	15.7389	3.70523	36.8317	8.27024	22160	NM_011658
Vti1b	604.208	1.04439	0.125442	8.32566	8.38631e-17	3.10415e-15	569.07	62.6205	272.734	12.7459	53612	NM_001364374
Adamts16	3.51671	-5.20226	1.04347	-4.98552	6.17964e-07	4.00023e-06	0	0	8.32839	5.56489	271127	NM_172053
Akr1c18	8.06504	-4.45569	0.72481	-6.14739	7.87686e-10	9.05662e-09	0.527396	0.482868	16.073	5.19918	105349	NM_001346535
Ankrd32	134.826	1.65486	0.140015	11.8191	3.10864e-32	6.28313e-30	131.962	19.2057	42.8633	4.46418	NA	NA
Arrdc3	805.491	1.17632	0.253641	4.63775	3.52222e-06	1.93716e-05	636.977	215.877	293.431	37.0353	105171	NM_001042591
Arsb	106.871	-2.10021	0.207049	-10.1435	3.54062e-24	3.3781e-22	33.0769	11.9737	132.606	19.3833	11881	NM_009712
Bhmt	3.68955	-5.67366	1.25906	-4.50628	6.59741e-06	3.39734e-05	0	0	8.40025	11.1832	12116	NM_016668
Cd180	18.4499	-4.07203	0.576437	-7.06413	1.61627e-12	2.94514e-11	2.1571	1.70976	39.519	27.4407	17079	NM_001360519
Cd83	29.5342	-2.6002	0.407185	-6.3858	1.705e-10	2.24811e-09	7.27585	1.92916	47.7534	34.4905	12522	NM_001289915
Cmah	65.4095	-2.82746	0.353583	-7.99661	1.27894e-15	3.98493e-14	15.0866	5.30151	107.072	65.6871	12763	NM_001111110
Cox7c	1426.32	1.09334	0.161234	6.78106	1.19297e-11	1.90096e-10	1184.31	131.523	535.069	46.2033	12867	NM_007749
Cplx2	29.8696	-2.14801	0.357047	-6.01604	1.78732e-09	1.93073e-08	8.88032	3.82715	38.3089	17.8844	12890	NM_001362218
Dbn1	102.263	-1.33081	0.154099	-8.63609	5.817e-18	2.553e-16	52.008	7.79869	127.146	18.708	56320	NM_001177371
Ecm2	250.527	-1.12111	0.148857	-7.53146	5.01757e-14	1.20997e-12	123.536	31.1586	259.817	17.3482	407800	NM_001012324
Ell2	288.438	1.20526	0.187421	6.43078	1.26949e-10	1.7046e-09	273.124	22.7989	117.14	13.0601	192657	NM_138953
Elmo1	86.7318	-1.19774	0.198255	-6.04139	1.5279e-09	1.67285e-08	43.6397	14.685	102.828	11.9681	140580	NM_080288
Emb	54.0576	-1.97546	0.37573	-5.25766	1.45902e-07	1.07595e-06	15.3637	7.91929	56.4606	28.4785	13723	NM_010330
F13a1	570.314	-1.86753	0.249287	-7.4915	6.80932e-14	1.59692e-12	156.042	66.5145	583.747	131.861	74145	NM_001166391
Fgfr4	22.8166	-1.77983	0.297867	-5.97524	2.29751e-09	2.43393e-08	10.3168	3.23439	36.2573	8.36365	14186	NM_008011
Gas1	231.315	-1.27849	0.157339	-8.12568	4.44859e-16	1.48232e-14	98.0961	24.1293	246.921	14.9221	14451	NM_008086
Gli3	34.5907	-1.47487	0.231223	-6.37858	1.78733e-10	2.34861e-09	14.5023	4.80145	39.6166	5.2205	14634	NM_008130
Gmnn	31.9898	1.24196	0.273589	4.53953	5.63789e-06	2.94972e-05	35.18	8.11981	15.8866	5.5245	57441	NM_020567
Gpx8	83.2953	-1.49276	0.266589	-5.5995	2.14974e-08	1.90001e-07	40.003	9.95122	101.713	19.7895	69590	NM_027127
Hapln1	3.08955	-5.85507	1.19112	-4.91561	8.85043e-07	5.54225e-06	0	0	9.48386	9.50402	12950	NM_013500
Hist1h4c	11.5378	2.20422	0.400605	5.50223	3.75025e-08	3.13425e-07	23.486	8.34905	4.59155	1.35235	NA	NA
Hist1h4d	15.3693	1.72663	0.308417	5.59836	2.16385e-08	1.91028e-07	27.8323	4.8807	8.14076	2.65441	NA	NA
Hmgcr	61.6251	-1.86673	0.225078	-8.29372	1.09757e-16	3.98577e-15	23.7957	11.004	88.8658	11.5124	15357	NM_001360165
Iqgap2	63.0418	-1.69027	0.259504	-6.51348	7.34309e-11	1.03294e-09	24.897	10.3837	78.6862	25.084	544963	NM_027711
Itga1	283.292	-1.21024	0.174925	-6.91859	4.56148e-12	7.73387e-11	117.82	23.9362	295.422	27.5817	109700	NM_001033228
Itga2	7.79967	-2.75554	0.573663	-4.80341	1.55985e-06	9.25127e-06	1.07212	1.20175	10.7763	4.11709	16398	NM_008396
Jarid2	287.541	-1.02385	0.109244	-9.37213	7.108e-21	4.68609e-19	168.714	4.76269	361.121	27.7019	16468	NM_001205043
Lhfpl2	78.5147	-1.7539	0.268006	-6.54424	5.97991e-11	8.52901e-10	29.0021	16.1643	101.703	12.9469	218454	NM_172589
Ly86	38.6471	-1.95554	0.348848	-5.6057	2.07418e-08	1.83534e-07	12.08	7.32811	46.9118	20.7311	17084	NM_010745
Mboat1	17.68	-2.02963	0.415693	-4.88253	1.04735e-06	6.46639e-06	6.1929	1.99954	22.5665	6.3996	218121	NM_153546
Mylk4	12392.1	1.00793	0.143393	7.02919	2.07739e-12	3.72789e-11	9561.69	1121.38	4832.02	613.358	238564	NM_001166030
Nfil3	243.012	1.263	0.212621	5.94012	2.84814e-09	2.9561e-08	220.732	38.0918	89.1235	21.2816	18030	NM_017373
Nid1	2124.34	-1.40387	0.143341	-9.79392	1.19564e-22	9.4186e-21	830.59	166.428	2251.34	182.162	18073	NM_010917
Nln	66.9461	-1.37491	0.177112	-7.76295	8.29768e-15	2.25594e-13	29.8818	6.06214	78.7873	6.32382	75805	NM_029447
Ogn	1056.51	-1.02403	0.140696	-7.27834	3.37945e-13	6.96801e-12	372.799	82.3652	752.203	98.5311	18295	NM_008760
Omd	33.4181	-1.91208	0.265937	-7.18996	6.48085e-13	1.27631e-11	7.94253	3.07902	30.5415	2.83525	27047	NM_001360708
Pde4d	2382.31	1.59194	0.150251	10.5952	3.13716e-26	3.51751e-24	1957.64	298.104	656.965	132.555	238871	NM_011056
Rgs14	10.2521	-2.47456	0.549926	-4.49981	6.8014e-06	3.48719e-05	2.78824	1.88373	14.3104	7.57397	51791	NM_001360714
Rnf144b	395.252	1.20001	0.162133	7.40137	1.34782e-13	2.99622e-12	345.53	69.4625	155.764	27.7826	218215	NM_001170643
Serinc5	125.757	-1.04705	0.182833	-5.72678	1.02355e-08	9.56951e-08	70.4483	20.2502	146.213	19.847	218442	NM_172588
Serpinb1a	61.2935	-1.38938	0.27842	-4.99023	6.03074e-07	3.90879e-06	33.6175	10.0333	85.0853	45.8738	66222	NM_025429
Serpinb6a	1710.45	1.07149	0.122796	8.72576	2.64399e-18	1.19103e-16	1735.77	227.359	818.728	101.402	20719	NM_001164117
Serpinb6b	13.8132	-3.14481	0.653288	-4.81382	1.48072e-06	8.82627e-06	2.4476	2.59061	23.1484	20.8438	20708	NM_011454
Sfrp4	136.831	-2.62367	0.285117	-9.20207	3.51131e-20	2.05914e-18	34.7647	21.0184	206.875	18.0629	20379	NM_016687
Sox4	60.6452	-1.4375	0.295186	-4.8698	1.1171e-06	6.83399e-06	25.9801	5.51183	72.8053	19.0784	20677	NM_009238
Tgfbi	605.641	-1.39507	0.1272	-10.9675	5.47481e-28	7.37707e-26	236.74	24.0814	628.499	71.1362	21810	NM_009369
Thbs4	1130.86	-1.87507	0.167707	-11.1806	5.07558e-29	7.71941e-27	365.477	121.808	1334.83	40.7714	21828	NM_011582
Tifab	16.97	-2.40533	0.405726	-5.92846	3.05785e-09	3.14824e-08	5.70457	1.81407	27.0602	8.67635	212937	NM_001168615
Vcan	118.066	-1.78301	0.230868	-7.72308	1.13555e-14	2.97666e-13	49.5429	18.48	162.36	51.3614	13003	NM_001081249
6720456H20Rik	67.475	-1.18855	0.189304	-6.27853	3.41794e-10	4.22729e-09	31.17	8.31947	74.4226	13.9574	NA	NA
Anxa8	26.3817	-2.48336	0.393994	-6.30304	2.91861e-10	3.65087e-09	5.56671	2.85602	30.7344	9.61811	11752	NM_001281845
Arhgef3	194.092	-1.17929	0.139837	-8.43336	3.35892e-17	1.31288e-15	95.6215	15.4238	219.158	39.1988	71704	NM_001289686
Bmp1	278.653	-1.12977	0.110991	-10.1789	2.46309e-24	2.36472e-22	155.965	17.655	345.19	37.8078	12153	NM_001360021
Dok2	28.8959	-2.49022	0.330135	-7.54305	4.591e-14	1.11234e-12	9.4199	4.70961	48.7628	12.648	13449	NM_010071
Dph3	483.995	1.06866	0.154607	6.91212	4.77467e-12	8.04207e-11	519.674	77.3848	233.306	14.7526	105638	NM_001047433
Dupd1	293.499	1.04429	0.190783	5.47371	4.40705e-08	3.62985e-07	351.872	101.571	184.785	37.7988	435391	NM_001013826
Dzip1	29.7444	-1.69311	0.295538	-5.72889	1.01089e-08	9.46273e-08	10.5768	1.98224	34.1856	7.89856	66573	NM_001360411
Ear2	14.0795	-2.57645	0.571435	-4.50874	6.52143e-06	3.36612e-05	3.39498	2.38263	16.8449	7.81266	13587	NM_007895
Efs	34.4181	-1.51313	0.313701	-4.82347	1.4108e-06	8.45213e-06	12.3013	6.94912	44.8186	12.3014	13644	NM_010112
Epb4.9	43.5777	-1.50528	0.242513	-6.20702	5.40004e-10	6.41035e-09	19.5773	6.57338	52.974	15.9794	NA	NA
Epsti1	36.0618	-2.89239	0.438301	-6.59909	4.13681e-11	6.0062e-10	9.87449	4.66002	64.259	50.6789	108670	NM_029495
Fam167a	25.0608	-2.4559	0.338425	-7.25686	3.96173e-13	8.08183e-12	7.92207	5.7491	42.2562	7.90725	219148	NM_177628
Farp1	90.3767	-1.16595	0.225785	-5.16398	2.41752e-07	1.69414e-06	45.4137	18.0155	99.8583	4.68007	223254	NM_134082
Gdf10	94.4953	-1.60772	0.225827	-7.11923	1.08532e-12	2.06223e-11	32.8898	8.59563	106.313	15.8958	14560	NM_145741
Gfra2	33.0813	-1.64958	0.254921	-6.47094	9.7396e-11	1.34421e-09	14.1934	4.62285	39.4941	4.58277	14586	NM_001302094
Gpc6	107.535	-1.75805	0.182489	-9.63376	5.75821e-22	4.27303e-20	37.7178	14.349	125.41	5.81942	23888	NM_001079844
Gpr183	11.8227	-2.41676	0.501383	-4.82018	1.43428e-06	8.58278e-06	3.24641	1.30187	18.2164	9.288	321019	NM_183031
Itgbl1	97.3695	-1.91339	0.214293	-8.92882	4.30571e-19	2.19007e-17	32.5056	12.5408	119.948	19.89	223272	NM_145467
Kctd12	339.692	-1.58985	0.165994	-9.57775	9.91858e-22	7.22082e-20	118.31	23.6122	371.805	77.8706	239217	NM_177715
Lacc1	17.1877	-1.77675	0.352239	-5.04415	4.55542e-07	3.0332e-06	6.68806	2.2116	22.339	4.61535	210808	NM_172488
Lcp1	259.66	-2.38591	0.399104	-5.97816	2.25671e-09	2.39452e-08	73.6508	31.0755	379.822	250.057	18826	NM_001247984
Loxl2	221.745	-2.8365	0.187917	-15.0944	1.76235e-51	1.59244e-48	58.5578	18.0588	417.051	67.2807	94352	NM_033325
Lrtm1	427.725	-1.39521	0.147077	-9.48622	2.39554e-21	1.68027e-19	232.186	29.2481	597.144	112.651	319476	NM_176920
Mmp14	213.339	-1.76457	0.201825	-8.74308	2.26835e-18	1.03089e-16	84.6905	19.3993	283.998	63.7296	17387	NM_008608
Mss51	662.233	3.60905	0.289125	12.4827	9.2828e-36	2.4585e-33	847.07	176.537	66.122	23.1296	74843	NM_029104
Nid2	167.648	-1.65648	0.216916	-7.63651	2.23197e-14	5.667e-13	62.099	25.8244	218.974	41.5105	18074	NM_008695
Ogdhl	12.8702	2.51518	0.389972	6.44966	1.12099e-10	1.52116e-09	14.8555	2.53482	2.42701	1.38587	239017	NM_001081130
Pcdh17	22.3948	-2.2093	0.375649	-5.88131	4.0704e-09	4.11352e-08	5.6792	1.30768	31.4263	9.08419	219228	NM_001013753
Pcdh20	13.4232	-2.80528	0.464489	-6.0395	1.5459e-09	1.68775e-08	3.23669	1.4232	22.6658	4.40894	219257	NM_178685
Phf11d	33.2695	-1.15127	0.242839	-4.74087	2.12802e-06	1.23213e-05	16.5012	2.70658	34.2653	4.61092	219132	NM_001164323
Rap2a	92.2454	-1.16523	0.212079	-5.49433	3.92207e-08	3.26542e-07	45.1128	16.1072	106.214	16.2939	76108	NM_029519
Rgcc	638.711	2.21138	0.183488	12.0519	1.89469e-33	4.09921e-31	747.712	218.054	158.165	26.031	66214	NM_025427
Scara3	165.53	-2.02185	0.161763	-12.4988	7.57717e-36	2.07844e-33	51.4546	9.45615	227.94	22.147	219151	NM_172604
Syt15	22.342	-1.38718	0.288803	-4.80321	1.5614e-06	9.2569e-06	9.92543	3.427	28.1155	6.80393	319508	NM_176931
Tkt	1133.39	-3.093	0.320383	-9.65408	4.72386e-22	3.52249e-20	267.111	96.3632	2143.7	471.586	21881	NM_009388
Tnnc1	1129.1	1.30347	0.272139	4.78972	1.6701e-06	9.83682e-06	1089.16	226.165	441.2	62.0248	21924	NM_009393
Tpt1	12560.2	1.15159	0.127442	9.03623	1.62172e-19	8.6799e-18	10811.3	703.996	4698.38	510.164	22070	NM_009429
Usp54	122.433	1.1923	0.175799	6.78217	1.18386e-11	1.8884e-10	104.559	20.2203	45.6601	11.8471	78787	NM_030180
Wdfy4	66.9582	-2.15863	0.377554	-5.7174	1.08165e-08	1.0076e-07	18.6984	4.06477	90.3587	55.8825	545030	NM_001146022
Wnt5a	56.5978	-2.06571	0.298712	-6.91537	4.66632e-12	7.87684e-11	21.275	7.27835	92.3314	5.29459	22418	NM_001256224
Abcd2	658.592	-1.08629	0.151196	-7.18464	6.73832e-13	1.32362e-11	333.744	47.8775	683.444	33.5734	26874	NM_001358967
Abra	2416.56	1.37843	0.152466	9.0409	1.55393e-19	8.34614e-18	2261.89	258.349	856.036	188.053	223513	NM_175456
Adamts12	98.3532	-3.19671	0.286395	-11.1619	6.26329e-29	9.43239e-27	20.7967	16.4146	191.51	30.6778	239337	NM_175501
Adamts20	48.0323	-2.81003	0.293041	-9.58921	8.87641e-22	6.49288e-20	16.2632	10.8404	110.877	14.0513	223838	NM_001164785
Apol7c	7.71047	-6.16331	1.15793	-5.32269	1.02244e-07	7.7636e-07	0.168991	0.377876	23.0412	31.2038	108956	NM_175391
Basp1	31.3463	-2.14415	0.352126	-6.08917	1.13496e-09	1.26978e-08	10.4761	3.56379	42.7199	12.9026	70350	NM_027395
Bin2	16.6446	-2.4991	0.55202	-4.5272	5.97716e-06	3.10921e-05	4.61472	3.71309	24.2997	18.3011	668218	NM_001270537
C1qtnf3	15.2653	-3.63788	0.614551	-5.91957	3.22781e-09	3.31655e-08	1.86505	1.89513	34.0084	4.58545	81799	NM_001204134
C1qtnf6	71.7757	-3.24111	0.246604	-13.143	1.86798e-39	6.52137e-37	17.4826	4.18127	168.003	45.6566	72709	NM_001204152
Cacna1i	51.0182	3.60019	0.507794	7.08987	1.34241e-12	2.49044e-11	67.58	17.6255	5.98521	7.11795	239556	NM_001044308
Col14a1	370.637	-2.58189	0.1906	-13.5461	8.35403e-42	3.20816e-39	95.0279	33.5869	582.921	142.915	12818	NM_001368422
Col22a1	123.954	-1.33742	0.172553	-7.75078	9.13263e-15	2.44401e-13	79.6635	13.9182	197.053	46.9539	69700	NM_027174
Col2a1	60.3731	-5.89269	0.989891	-5.95287	2.63481e-09	2.75329e-08	4.30693	4.2248	220.815	247.331	12824	NM_001113515
Csf2rb	81.7061	-1.48465	0.276816	-5.3633	8.17163e-08	6.32047e-07	29.1411	12.1918	85.8712	32.6622	12983	NM_001358854
Cthrc1	4.92475	-3.71141	0.746835	-4.96953	6.71166e-07	4.30831e-06	1.08016	0.915769	13.495	6.92289	68588	NM_001364812
Cyth4	82.2703	-1.69093	0.24596	-6.8748	6.20764e-12	1.02313e-10	34.718	13.8503	106.403	25.011	72318	NM_028195
Dab2	274.632	-1.59474	0.188872	-8.44353	3.07895e-17	1.21271e-15	100.585	35.2711	320.766	28.8977	13132	NM_001008702
Dap	139.234	-1.39382	0.155883	-8.94146	3.8405e-19	1.97966e-17	61.8771	11.1825	169.771	12.4401	223453	NM_146057
Dennd6b	104.635	1.19771	0.160792	7.44881	9.41891e-14	2.15946e-12	112.691	17.5442	48.1669	12.606	69440	NM_027081
Fam134b	2322.93	1.68543	0.117681	14.322	1.59514e-46	1.02095e-43	2182.85	256.642	674.63	92.1427	NA	NA
Fam19a5	49.6761	1.06148	0.238296	4.45447	8.41001e-06	4.21626e-05	48.7857	18.6793	22.2479	6.44989	NA	NA
Fbln1	183.295	-1.4327	0.217567	-6.5851	4.54574e-11	6.57505e-10	62.1333	22.099	155.376	20.5387	14114	NM_001347088
Fbxo32	5019.83	2.99272	0.13153	22.7532	1.33469e-114	5.12555e-111	4403.93	535.175	553.46	126.563	67731	NM_026346
Foxred2	29.3951	-1.92589	0.342128	-5.62914	1.81107e-08	1.6165e-07	8.40502	5.56181	36.9474	13.6365	239554	NM_001017983
Galnt6	10.0098	-3.27889	0.677477	-4.83986	1.29934e-06	7.83326e-06	2.01954	1.50066	22.841	21.4718	207839	NM_001161767
Gpihbp1	481.554	1.06795	0.126991	8.40967	4.11174e-17	1.58694e-15	445.473	48.9471	213.468	15.4691	68453	NM_001347039
Grap2	13.9066	-3.33132	0.710192	-4.69073	2.72235e-06	1.54424e-05	2.66717	2.08542	29.2551	33.5236	17444	NM_001289442
Hnrnpa1	57.97	1.08598	0.201946	5.37757	7.54992e-08	5.896e-07	50.3732	7.23228	23.666	4.32753	15382	NM_001039129
Irak4	37.2853	-1.00887	0.209625	-4.81274	1.48878e-06	8.86746e-06	19.6334	2.46269	37.1733	5.84744	266632	NM_029926
Kdelr3	39.4166	-2.59915	0.26189	-9.92461	3.25378e-23	2.77674e-21	12.1214	6.5146	82.9262	17.4177	105785	NM_134090
Klhl38	763.784	2.44004	0.132395	18.4301	7.53661e-76	1.65386e-72	643.832	41.765	119.421	22.5855	268807	NM_177755
Lima1	336.307	-1.49037	0.134127	-11.1117	1.10075e-28	1.61035e-26	131.34	23.9402	395.388	43.6633	65970	NM_001113545
Mafa	145.695	-1.52041	0.198358	-7.66501	1.78817e-14	4.58565e-13	75.9304	18.4583	228.201	29.1719	378435	NM_194350
Matn2	134.047	-1.26387	0.238944	-5.28942	1.22707e-07	9.15447e-07	52.9891	22.1769	136.543	20.5626	17181	NM_001358780
Mb	13616.9	1.08687	0.131662	8.25496	1.51948e-16	5.35338e-15	13114.9	2085.42	6138.49	579.875	17189	NM_001164047
Mfng	81.9556	-1.02712	0.188932	-5.43646	5.43499e-08	4.39174e-07	45.5468	11.9412	90.13	16.5697	17305	NM_008595
Mkl1	258.542	-1.62741	0.124012	-13.1229	2.43292e-39	8.12436e-37	127.364	12.9457	407.676	36.8209	NA	NA
Mtss1	192.34	-1.02068	0.123568	-8.26012	1.45522e-16	5.18645e-15	111.498	21.1943	218.295	11.045	211401	NM_001146180
Nckap1l	101.626	-2.42786	0.381904	-6.35725	2.05403e-10	2.65416e-09	27.619	11.9279	142.506	89.0576	105855	NM_153505
Nfam1	48.1112	-2.10256	0.28294	-7.43113	1.07676e-13	2.43925e-12	16.4544	5.69187	71.6627	23.7562	74039	NM_001271411
Nov	129.462	-1.22549	0.168191	-7.28631	3.18563e-13	6.59494e-12	48.6568	18.5972	113.902	15.0524	NA	NA
Pim3	460.482	1.08835	0.13389	8.12867	4.34044e-16	1.45258e-14	396.967	46.299	191.904	30.0338	223775	NM_145478
Pkdrej	13.1099	2.31538	0.420777	5.50263	3.74169e-08	3.1288e-07	12.4038	3.55853	2.28632	1.23853	18766	NM_011105
Plxnb2	322.008	-1.2487	0.177873	-7.0202	2.21557e-12	3.94818e-11	148.741	27.4544	366.228	52.2744	140570	NM_001159521
Pnpla3	170.459	-1.62569	0.229934	-7.07027	1.54633e-12	2.83113e-11	81.5616	27.0606	237.785	60.2627	116939	NM_054088
Polr2k	187.864	1.24765	0.165014	7.56087	4.00376e-14	9.85606e-13	148.166	10.4601	60.1721	3.39933	17749	NM_001039368
Prlr	33.1689	-2.18021	0.484026	-4.50432	6.65863e-06	3.42428e-05	10.2399	11.0125	43.786	18.0171	19116	NM_001253781
Rac2	100.781	-2.26214	0.485034	-4.66388	3.103e-06	1.73391e-05	31.4292	7.6714	154.111	109.441	19354	NM_009008
Sdc2	323.562	-1.49343	0.103568	-14.4198	3.88306e-47	2.84037e-44	137.022	25.9285	404.591	20.908	15529	NM_008304
Sema5a	124.4	-1.4393	0.289113	-4.97832	6.41375e-07	4.14653e-06	44.401	16.1456	121.919	28.676	20356	NM_009154
Slc2a13	18.8435	-1.80624	0.386994	-4.66736	3.051e-06	1.70921e-05	5.80113	3.72415	19.1576	2.75608	239606	NM_001033633
Slc38a1	32.0651	-2.47621	0.484202	-5.11399	3.15421e-07	2.15725e-06	7.40722	7.03519	40.5263	23.9357	105727	NM_001166456
Sntb1	64.9462	-1.46234	0.262703	-5.5665	2.59905e-08	2.26169e-07	27.9287	11.5636	78.0253	16.7897	20649	NM_016667
Sqle	26.0051	-2.90926	0.296208	-9.82169	9.08068e-23	7.41959e-21	6.07916	1.77956	54.1056	12.634	20775	NM_009270
Syngr1	283.129	1.28083	0.131769	9.72022	2.47253e-22	1.88958e-20	287.463	29.8916	114.895	14.8882	20972	NM_009303
Tnfrsf11b	6.29035	-3.16944	0.696721	-4.54907	5.38829e-06	2.83249e-05	1.63085	1.47004	12.1386	5.9839	18383	NM_008764
Tuba1a	460.89	-1.36574	0.131513	-10.3849	2.90616e-25	3.03684e-23	197.684	35.0162	505.831	71.4188	22142	NM_011653
Vdr	5.08285	-3.92783	0.872571	-4.50145	6.74917e-06	3.46504e-05	0.759512	0.792527	9.10777	4.74	22337	NM_009504
Wisp1	13.7834	-4.38465	0.518524	-8.45602	2.76652e-17	1.0981e-15	1.95964	1.78629	39.9449	12.41	NA	NA
Zcrb1	634.136	1.039	0.141861	7.32409	2.40518e-13	5.07499e-12	649.583	72.8496	301.05	24.3827	67197	NM_001347097
Zfp385a	186.922	-1.52328	0.194356	-7.83755	4.59412e-15	1.29964e-13	90.6809	42.9031	258.18	13.5029	29813	NM_001356627
Zfp41	27.4749	-1.92602	0.306985	-6.27398	3.51938e-10	4.33183e-09	10.6442	9.43873	43.2778	6.572	22701	NM_001044718
AI480653	54.4464	-1.34651	0.219939	-6.12223	9.2276e-10	1.04764e-08	21.1348	9.6292	59.0787	8.79412	NA	NA
Abat	60.0826	-1.10765	0.246122	-4.50041	6.78217e-06	3.47965e-05	27.9907	6.30415	56.0788	7.29371	268860	NM_001170978
Abi3bp	259.428	-1.69835	0.149401	-11.3677	6.05394e-30	1.01081e-27	101.637	15.6076	328.746	30.9248	320712	NM_001014399
Ahsg	17.6318	-7.01473	1.39562	-5.02623	5.00203e-07	3.29911e-06	0.372505	0.510105	41.318	65.1807	11625	NM_001276449
Alcam	42.2669	-2.79756	0.441384	-6.33816	2.32526e-10	2.96663e-09	6.07244	2.58301	46.3204	8.93102	11658	NM_001331110
Bace2	32.4506	-1.50314	0.269719	-5.57299	2.504e-08	2.18421e-07	14.3842	6.19673	42.1971	7.14057	56175	NM_019517
Bdh1	226.848	2.02384	0.188583	10.7318	7.21588e-27	8.93897e-25	274.707	37.0317	69.6307	14.5386	71911	NM_001122683
Boc	101.313	-1.11479	0.192109	-5.80289	6.518e-09	6.33289e-08	45.6808	14.4823	101.928	9.67077	117606	NM_172506
Carhsp1	248.945	-1.28296	0.158878	-8.07512	6.74099e-16	2.16924e-14	111.228	35.8427	269.647	31.8684	52502	NM_025821
Casr	226.054	1.75485	0.168459	10.4171	2.07223e-25	2.18024e-23	165.76	33.9404	50.9307	16.5312	12374	NM_013803
Cblb	265.296	1.10699	0.125407	8.82719	1.07342e-18	5.13671e-17	258.331	12.2188	122.893	9.05761	208650	NM_001033238
Cebpd	474.115	1.58853	0.313341	5.06965	3.98547e-07	2.6863e-06	364.068	177.226	120.692	47.5481	12609	NM_007679
Ciita	38.1503	-2.73398	0.579483	-4.71796	2.38226e-06	1.36647e-05	8.42191	2.22884	53.4703	40.7411	12265	NM_001243760
Cldn1	81.072	-1.47859	0.279685	-5.28664	1.24585e-07	9.29001e-07	29.3901	14.8776	80.6321	8.45748	12737	NM_016674
Col8a1	89.4589	-1.62242	0.194345	-8.34815	6.93428e-17	2.59799e-15	42.5698	8.42243	136.028	37.0754	12837	NM_007739
Cox17	539.476	1.38661	0.171446	8.08773	6.07886e-16	1.97415e-14	571.478	91.4546	207.68	29.0223	12856	NM_001017429
Cxadr	16.2627	-2.882	0.538357	-5.35332	8.63556e-08	6.63918e-07	3.10602	1.52961	21.9796	11.4551	13052	NM_001025192
Epha3	6.79024	-3.7347	0.759847	-4.91507	8.87526e-07	5.55327e-06	0.899901	0.665884	13.7517	9.04084	13837	NM_001362452
Fstl1	1172.42	-1.70511	0.142702	-11.9487	6.59191e-33	1.36836e-30	479.763	111.74	1596.66	217.487	14314	NM_008047
Gap43	3.30495	-4.55369	1.01282	-4.49604	6.92291e-06	3.54004e-05	0.214786	0.480276	7.52036	4.56811	14432	NM_008083
Glis2	73.2494	-1.30349	0.236917	-5.50191	3.75701e-08	3.13731e-07	39.2628	17.7089	98.5455	20.2596	83396	NM_031184
Ifnar2	113.312	-1.12814	0.214658	-5.2555	1.47623e-07	1.08812e-06	57.6028	24.1227	123.314	22.345	15976	NM_001110498
Igf2bp2	11.7245	-3.37272	0.552294	-6.10675	1.01679e-09	1.14341e-08	2.11891	1.55391	19.8102	4.47526	319765	NM_183029
Il1rap	34.1402	-1.92835	0.275714	-6.99402	2.67123e-12	4.6841e-11	11.4977	5.03563	46.0597	4.20729	16180	NM_001159317
Lrrc33	69.033	-1.2903	0.241917	-5.33363	9.62668e-08	7.35699e-07	32.8056	7.62975	87.1489	30.3692	NA	NA
Masp1	17.8612	-2.18858	0.325738	-6.71881	1.8321e-11	2.81993e-10	4.95811	2.89899	23.4412	3.00325	17174	NM_001359083
Mrap	78.5793	-2.1724	0.2779	-7.81719	5.40145e-15	1.51408e-13	28.0298	9.26413	112.546	20.2441	77037	NM_029844
Muc4	11.6494	-3.27081	0.58635	-5.57826	2.42942e-08	2.12398e-07	2.04672	1.9669	21.1347	8.4204	140474	NM_080457
Naa50	2242.45	1.16824	0.104156	11.2163	3.3934e-29	5.31897e-27	2098.1	175.908	935.441	75.6438	72117	NM_001347239
Ndufb4	683.328	1.04413	0.184374	5.66311	1.48657e-08	1.3488e-07	450.823	74.9941	203.491	13.5402	68194	NM_026610
Ostn	852.897	4.78979	0.172995	27.6874	9.90299e-169	7.60599e-165	861.289	122.345	29.8927	10.0547	239790	NM_198112
Parp14	234.316	-1.17089	0.208052	-5.62789	1.82429e-08	1.62734e-07	119.506	24.5828	265.536	52.3621	547253	NM_001039530
Pdia5	31.3372	-1.674	0.249119	-6.71969	1.82112e-11	2.80865e-10	11.7808	3.86992	41.2624	7.05337	72599	NM_028295
Pigp	729.018	1.32975	0.160246	8.29821	1.05692e-16	3.84723e-15	734.467	54.5348	279.772	15.1235	56176	NM_001159616
Prodh	139.242	1.42966	0.196073	7.29148	3.0658e-13	6.36402e-12	101.007	14.3137	39.0389	10.3014	19125	NM_011172
Pros1	249.414	-1.03807	0.116776	-8.88938	6.14502e-19	3.06473e-17	114.207	7.73024	246.818	36.7192	19128	NM_011173
Pvrl3	34.5792	-1.4616	0.264337	-5.52931	3.21488e-08	2.73443e-07	16.4968	5.72994	43.0164	6.86672	NA	NA
Retnla	770.407	-1.87579	0.24303	-7.71833	1.17865e-14	3.08437e-13	242.281	107.351	831.99	185.188	57262	NM_020509
Rmi2	9.53995	-2.63503	0.585234	-4.50252	6.71517e-06	3.45105e-05	3.19698	3.67946	19.071	3.65277	223970	NM_001033278
Robo1	35.0875	-1.49348	0.319654	-4.67219	2.98008e-06	1.6762e-05	13.4786	5.80746	38.9534	7.78605	19876	NM_019413
Scarf2	76.0637	-1.20147	0.174007	-6.90472	5.03023e-12	8.40798e-11	38.4791	4.625	84.8596	14.5153	224024	NM_153790
Sec14l5	82.1356	-1.60047	0.200864	-7.96792	1.61371e-15	4.97755e-14	33.7249	10.6916	111.81	8.29173	665119	NM_001127725
2021-09-05	35.3566	-1.22182	0.2456	-4.97484	6.53004e-07	4.20402e-06	17.1041	5.68132	39.9464	9.97774	NA	NA
Slc25a1	423.779	-3.25655	0.299324	-10.8797	1.4407e-27	1.85972e-25	98.9513	49.37	927.691	138.791	13358	NM_153150
Snn	91.7413	-1.87199	0.254034	-7.36906	1.71836e-13	3.74408e-12	36.183	7.486	129.159	49.8899	20621	NM_009223
St6gal1	110.839	-1.05669	0.174	-6.07289	1.25625e-09	1.3933e-08	66.1265	14.8254	130.324	24.8806	20440	NM_001252505
Tfrc	1009.89	-1.15237	0.199843	-5.76637	8.09963e-09	7.73146e-08	608.956	72.0789	1362.51	230.931	22042	NM_001357298
Thpo	38.6299	1.56497	0.266917	5.86311	4.54278e-09	4.53422e-08	40.6437	6.96239	13.4177	4.55274	21832	NM_001173505
Tiam1	78.1159	-1.38664	0.198587	-6.98254	2.89883e-12	5.07163e-11	39.0362	15.2376	97.6251	10.1917	21844	NM_001145886
Tmem45a	20.5974	-3.85182	0.463053	-8.3183	8.92367e-17	3.27934e-15	3.02062	1.4785	34.809	8.41184	56277	NM_019631
Trp63	136.139	1.83321	0.181107	10.1223	4.4012e-24	4.14766e-22	140.178	16.8391	41.5673	8.68408	22061	NM_001127259
Uts2d	10.0863	3.91081	0.774008	5.05268	4.35662e-07	2.91219e-06	5.78415	2.70394	0.625828	1.2063	NA	NA
Acat2	67.4395	-1.56433	0.290715	-5.38097	7.40843e-08	5.79729e-07	33.5474	18.5287	97.4253	23.9965	110460	NM_009338
Angptl4	225.32	1.12983	0.244243	4.62586	3.73045e-06	2.03565e-05	158.556	66.824	67.9169	24.1513	57875	NM_020581
Arhgap28	17.2107	-2.37662	0.466421	-5.09545	3.4792e-07	2.37002e-06	5.36236	2.57988	28.6828	6.1142	268970	NM_001347410
C2	108.527	-1.89248	0.266366	-7.10481	1.20489e-12	2.25162e-11	28.5521	13.382	105.766	18.7963	12263	NM_013484
C3	4102.55	-1.28703	0.177335	-7.25761	3.93996e-13	8.05881e-12	1367	341.878	3306.56	1054.59	12266	NM_009778
Ccnd3	184.542	-1.06968	0.137914	-7.75613	8.756e-15	2.35553e-13	97.3673	18.5388	204.792	27.7605	12445	NM_001081635
Cdkn1a	517.664	1.27064	0.189644	6.70015	2.08209e-11	3.1635e-10	424.663	109.542	186.175	46.2301	12575	NM_001111099
Cfb	209.634	-1.67667	0.22578	-7.42612	1.11826e-13	2.52611e-12	58.5801	24.083	208.128	56.059	14962	NM_001142706
Clic1	185.537	-1.21324	0.170419	-7.11913	1.08609e-12	2.06223e-11	84.716	7.52608	198.88	46.2234	114584	NM_033444
Col11a2	65.3593	-2.7547	0.315261	-8.73783	2.37633e-18	1.07678e-16	25.3646	9.13658	162.439	81.0081	12815	NM_001317722
Cul7	101.988	-1.4542	0.2018	-7.20617	5.75465e-13	1.13914e-11	48.3706	17.7076	138.979	16.7784	66515	NM_025611
Daam2	93.6099	-1.15943	0.172871	-6.70692	1.98775e-11	3.02614e-10	46.5527	4.87846	110.292	16.4547	76441	NM_001008231
Def6	26.3382	-1.36751	0.295036	-4.63507	3.56809e-06	1.95888e-05	13.3642	6.39089	34.246	6.74146	23853	NM_027185
Dnph1	45.0454	1.17623	0.217261	5.41391	6.16645e-08	4.92835e-07	47.0611	12.8954	21.0088	4.82151	381101	NM_207161
Eif2ak2	76.6345	-1.06237	0.202536	-5.24532	1.56009e-07	1.14369e-06	38.073	8.092	83.9684	16.2117	19106	NM_011163
Emilin2	196.475	-1.78692	0.168485	-10.6058	2.79924e-26	3.18512e-24	71.5805	22.9464	247.008	42.5126	246707	NM_001357336
Emr1	104.762	-1.99961	0.258833	-7.7255	1.11418e-14	2.92862e-13	25.1993	9.57375	115.881	29.8428	NA	NA
Epb4.1l3	32.165	-1.69221	0.30264	-5.59149	2.25124e-08	1.97947e-07	12.1372	3.78874	38.0692	4.55422	NA	NA
Ezr	86.9208	-2.12494	0.407949	-5.20884	1.9002e-07	1.36525e-06	26.9925	7.73936	116.475	72.7887	22350	NM_009510
Fam195a	358.115	1.04425	0.146422	7.13178	9.9076e-13	1.89764e-11	384.263	63.078	181.632	21.2045	NA	NA
Fgd2	27.364	-1.81928	0.392968	-4.62959	3.66394e-06	2.00434e-05	10.9358	6.68244	40.8301	16.6454	26382	NM_001159538
Fkbp5	1173.08	2.55196	0.26826	9.51301	1.85224e-21	1.31116e-19	1033.61	179.823	173.925	71.3013	14229	NM_010220
Fndc1	654.91	-1.3335	0.152038	-8.77083	1.77353e-18	8.20579e-17	278.263	56.6764	719.277	62.4801	68655	NM_001081416
Ggnbp1	65.9506	1.58249	0.195185	8.10762	5.16218e-16	1.69799e-14	87.27	14.4481	27.8563	10.1608	70772	NM_001251881
Gm5091	13.6414	2.32011	0.459728	5.04671	4.49494e-07	2.99552e-06	18.1631	5.1293	3.53844	2.09744	328747	NR_046164
H2-DMb1	44.3202	-1.28295	0.289485	-4.43183	9.34377e-06	4.64047e-05	19.9388	6.4052	47.7199	15.71	14999	NM_010387
H2-Ke6	245.202	1.16639	0.138133	8.44396	3.06762e-17	1.21136e-15	264.869	26.4562	116.959	8.67027	14979	NM_013543
Igfals	40.7834	-2.10754	0.241725	-8.71875	2.81279e-18	1.26337e-16	16.0366	2.63243	61.1369	13.4722	16005	NM_001364895
Lrrc30	1477.99	1.79724	0.170552	10.5378	5.78294e-26	6.34512e-24	1378.78	208.615	389.944	44.9932	240131	NM_001033340
Mdga1	105.744	-3.10875	0.225805	-13.7674	4.00427e-43	1.83202e-40	23.0284	7.42714	233.658	60.0915	74762	NM_001081160
Mnf1	1114.15	1.42962	0.190466	7.50592	6.09981e-14	1.45045e-12	1295.28	184.395	453.86	27.7366	NA	NA
Mrpl14	392.396	1.23599	0.1652	7.48174	7.33473e-14	1.70194e-12	439.977	74.2958	180.121	13.5152	68463	NM_026732
Myo1f	39.1426	-1.91414	0.327913	-5.83733	5.30434e-09	5.25677e-08	12.7923	8.88833	52.5741	17.9014	17916	NM_053214
Ndufa7	1045.63	1.10128	0.148862	7.39801	1.38238e-13	3.06732e-12	1124.04	148.787	499.962	47.7801	66416	NM_023202
Nme4	22.932	1.29145	0.270727	4.77029	1.83962e-06	1.07692e-05	25.814	2.90945	10.0204	2.88718	56520	NM_019731
Nrm	15.2046	-1.53767	0.3407	-4.51327	6.38364e-06	3.30165e-05	6.90675	2.92981	21.8833	6.22601	106582	NM_134122
Pi16	762.595	-1.1612	0.124874	-9.29895	1.41834e-20	8.82068e-19	351.82	28.608	796.079	88.4098	74116	NM_023734
Plin4	6539.28	1.44416	0.101668	14.2047	8.56098e-46	5.05789e-43	4602.65	307.854	1672.71	187.83	57435	NM_001372234
Plin5	275.301	2.00887	0.204643	9.81648	9.56225e-23	7.73083e-21	295.268	64.935	73.7382	20.883	66968	NM_001077348
Prepl	140.632	-1.22245	0.131624	-9.2874	1.58098e-20	9.6755e-19	67.0758	13.2685	163.526	25.5092	213760	NM_001163622
Ptk7	20.5278	-2.63861	0.580293	-4.54703	5.44079e-06	2.85632e-05	4.8278	2.93272	28.332	5.27022	71461	NM_175168
Ptx4	10.4009	-4.79206	0.767523	-6.24354	4.27774e-10	5.1677e-09	0.891895	1.27954	24.3609	5.39725	68509	NM_001163416
Qpct	44.1462	-1.92962	0.235711	-8.18636	2.69245e-16	9.31503e-15	12.2833	6.37445	47.0003	4.62191	70536	NM_001316729
Rab31	118.886	-1.25199	0.181268	-6.90684	4.95554e-12	8.30121e-11	53.0611	13.5563	135.677	22.435	106572	NM_133685
Rn45s	367023	1.37122	0.155299	8.82955	1.05102e-18	5.04523e-17	436757	42532.7	166713	28740.4	100861531	NR_046233
Rpl36	1689.12	1.05873	0.14343	7.38148	1.56543e-13	3.42057e-12	1507.61	116.606	695.852	39.9099	54217	NM_018730
Rps28	954.317	1.02964	0.157984	6.51733	7.157e-11	1.00954e-09	725.015	96.8674	342.107	46.2753	54127	NM_001355384
Synj2	361.053	1.23246	0.123725	9.96126	2.25185e-23	1.97661e-21	327.967	21.0599	142.169	30.9457	20975	NM_001113351
Tceb2	939.746	1.10365	0.141886	7.77843	7.34312e-15	2.01424e-13	951.058	66.3459	422.392	35.1499	NA	NA
Thbs2	555.417	-1.29207	0.25163	-5.13479	2.82459e-07	1.94567e-06	199.5	87.132	477.195	47.5332	21826	NM_011581
Tnfrsf12a	186.278	1.40087	0.237062	5.90932	3.4353e-09	3.51994e-08	221.538	48.3384	84.5828	37.117	27279	NM_001161746
Treml2	7.14373	-3.5494	0.788911	-4.49911	6.82382e-06	3.49752e-05	1.44904	1.90699	14.1072	8.85685	328833	NM_001033405
Tubb4a	24.4873	-1.62755	0.300739	-5.41184	6.238e-08	4.97518e-07	9.3902	5.43703	33.569	9.34933	22153	NM_009451
Zfp52	70.6794	1.23185	0.174279	7.06831	1.56834e-12	2.868e-11	68.7833	4.22961	31.0236	6.87142	22710	NM_144515
6330403M23Rik	52.4943	1.02927	0.197774	5.20428	1.94755e-07	1.39692e-06	51.8998	5.74009	25.1212	4.8951	NA	NA
Apbb3	109.505	1.09633	0.15942	6.87702	6.11183e-12	1.0095e-10	114.554	10.9501	52.649	10.9089	225372	NM_001357512
Aqp4	358.017	-2.13761	0.12712	-16.8156	1.87529e-63	2.88063e-60	156.63	18.9239	685.357	69.282	11829	NM_001308641
Arsi	24.4561	-2.73647	0.414813	-6.59687	4.19927e-11	6.09113e-10	8.75627	5.09175	53.0635	13.5664	545260	NM_001038499
B4galt6	43.4814	-1.06792	0.202865	-5.26418	1.40814e-07	1.04042e-06	20.9309	4.4887	46.4624	2.89275	56386	NM_019737
Bambi	19.5076	-2.12227	0.369504	-5.74357	9.27034e-09	8.7256e-08	6.56965	2.13541	32.4455	4.64356	68010	NM_026505
Cdh2	20.177	-1.6337	0.362849	-4.50243	6.71804e-06	3.45137e-05	8.33457	4.28547	27.6917	11.1142	12558	NM_007664
Cdo1	668.166	-1.60796	0.287282	-5.59712	2.17938e-08	1.92178e-07	253.82	128.61	726.75	71.4817	12583	NM_033037
Colec12	176.522	-1.84716	0.201505	-9.16685	4.87023e-20	2.79148e-18	60.1927	20.4723	218.825	43.166	140792	NM_130449
Csf1r	440.57	-1.63862	0.212048	-7.72758	1.09613e-14	2.88811e-13	148.824	48.5994	491.9	87.2001	12978	NM_001037859
Ctxn3	231.587	1.94086	0.231207	8.39446	4.68051e-17	1.79295e-15	281.094	31.4517	69.03	18.3122	629147	NM_001134697
Cxxc5	184.012	-1.38434	0.159633	-8.67203	4.24484e-18	1.87371e-16	99.4904	19.8499	267.571	21.7312	67393	NM_001357458
Dpysl3	63.6622	-1.75076	0.21542	-8.12717	4.39425e-16	1.46739e-14	23.7548	3.22516	79.1834	3.52864	22240	NM_001136086
Dsc3	9.00655	-3.87941	0.868048	-4.46912	7.85427e-06	3.96482e-05	1.63845	1.79267	20.0279	18.8495	13507	NM_001291809
Fbn2	4.1953	-4.87753	1.00554	-4.85063	1.23067e-06	7.4603e-06	0.168991	0.377876	9.42906	4.54396	14119	NM_010181
Hbegf	107.03	-1.09798	0.199237	-5.51094	3.56915e-08	2.99594e-07	65.498	16.2873	138.818	24.5278	15200	NM_010415
Lox	212.382	-1.88923	0.223934	-8.43655	3.2685e-17	1.2808e-15	64.2838	36.0319	231.092	16.3642	16948	NM_001286181
Mbp	898.511	-1.28979	0.180106	-7.16127	7.99309e-13	1.55224e-11	441.026	117.428	1063.98	237.91	17196	NM_001025245
Mc5r	18.8193	-1.85481	0.307672	-6.02852	1.65465e-09	1.79626e-08	6.95828	3.54511	26.0616	3.92994	17203	NM_013596
Me2	44.523	-1.12067	0.242987	-4.61207	3.98686e-06	2.15718e-05	21.1611	6.10213	50.3547	15.7559	107029	NM_145494
Megf10	18.8462	-1.43644	0.311466	-4.61187	3.99067e-06	2.15847e-05	9.55597	3.40852	28.0561	6.99096	70417	NM_001001979
Mkx	9.4252	-2.40763	0.454146	-5.30143	1.14898e-07	8.62631e-07	3.48529	2.48932	14.9712	3.69133	210719	NM_177595
Ndufa2	1426.86	1.25414	0.170575	7.35246	1.94597e-13	4.20423e-12	1363.15	246.083	544.513	46.2086	17991	NM_010885
Npc1	817.29	1.11275	0.123447	9.01402	1.98637e-19	1.0558e-17	621.772	93.7389	297.563	37.957	18145	NM_008720
Nrep	458.105	-1.78122	0.172404	-10.3316	5.06952e-25	5.08973e-23	209.839	34.6947	711.571	140.174	27528	NM_001109988
Pard6g	32.2484	-1.47851	0.287915	-5.13523	2.81803e-07	1.9429e-06	14.024	5.79511	37.2219	1.91884	93737	NM_053117
Pcdhb17	18.0409	-1.99091	0.357485	-5.56922	2.55883e-08	2.22824e-07	7.11255	3.12532	24.3004	5.22662	93888	NM_053142
Pcdhgc3	185.121	-1.57441	0.150147	-10.4858	1.00378e-25	1.08586e-23	70.1042	12.9424	223.591	31.4212	93706	NM_033581
Piezo2	32.0411	-1.89683	0.287749	-6.59197	4.34035e-11	6.28389e-10	9.91519	3.55805	36.6956	3.33874	667742	NM_001039485
Slc26a2	65.8281	-1.07154	0.207056	-5.1751	2.27786e-07	1.60949e-06	31.8652	7.54014	71.6987	11.5951	13521	NM_007885
Slc39a6	40.6168	-1.53629	0.2675	-5.74315	9.29318e-09	8.74174e-08	17.0493	7.60605	47.6857	8.54809	106957	NM_139143
Stard4	32.3972	-1.45247	0.270487	-5.36983	7.88104e-08	6.11727e-07	11.1729	5.25267	40.0615	5.90273	170459	NM_001347624
Synpo	1517.76	1.00731	0.110723	9.09754	9.24036e-20	5.1428e-18	1354.2	116.242	678.456	110.335	104027	NM_001109975
Ticam2	10.0249	-2.71553	0.583052	-4.65743	3.20176e-06	1.78326e-05	1.30737	0.874534	9.76553	4.12319	225471	NM_173394
Tmem173	51.9254	-1.57615	0.261865	-6.01892	1.75579e-09	1.90069e-08	21.2985	5.75011	66.3496	23.9018	NA	NA
Tnfaip8	75.6487	-1.58969	0.222283	-7.15165	8.57425e-13	1.6588e-11	30.2127	8.32962	87.0592	20.142	106869	NM_001177759
Ttr	8.39696	-7.14873	1.45164	-4.92458	8.45425e-07	5.31583e-06	0	0	23.2838	38.6233	22139	NM_013697
Zbtb7c	19.9126	-1.84277	0.351669	-5.24008	1.60506e-07	1.17239e-06	6.29218	3.25898	22.6158	1.85412	207259	NM_001357506
1810055G02Rik	59.2869	-1.29709	0.220048	-5.89455	3.75709e-09	3.8229e-08	30.8079	7.04296	70.7366	14.2205	72056	NM_001358256
2010003K11Rik	5.31301	-4.33799	0.804678	-5.39096	7.00826e-08	5.52071e-07	0.356859	0.489787	14.5374	5.26283	69861	NM_027237
4930481A15Rik	63.1833	1.35115	0.242955	5.56135	2.67701e-08	2.31734e-07	68.0618	7.4986	24.5553	4.63426	74931	NR_015545
Acsl5	133.338	-1.42196	0.167543	-8.48714	2.11787e-17	8.53874e-16	56.8619	12.4289	155.99	32.3681	433256	NM_027976
Acy3	20.1086	-1.34664	0.287998	-4.67588	2.92701e-06	1.64876e-05	10.1098	0.9918	24.0409	4.59602	71670	NM_001302479
Add3	469.622	-1.11499	0.130824	-8.52278	1.5577e-17	6.36379e-16	222.475	39.5337	502.3	86.6203	27360	NM_001164099
Afap1l2	46.6249	-1.06115	0.2254	-4.70783	2.50372e-06	1.42996e-05	21.7338	5.43162	48.4072	10.876	226250	NM_001177796
Aldh18a1	39.5683	-2.52338	0.288573	-8.74433	2.24341e-18	1.02258e-16	10.5634	4.38642	64.5804	6.24581	56454	NM_019698
Aldh1a1	1164.24	1.60392	0.119426	13.4302	4.02178e-41	1.47092e-38	1216.78	56.1913	384.733	57.0229	11668	NM_001361503
Aldh1a7	55.3952	-2.38497	0.309377	-7.70896	1.26847e-14	3.31376e-13	17.7701	10.4636	90.1197	12.6783	26358	NM_011921
Ankrd1	202.775	2.14691	0.367479	5.84226	5.14979e-09	5.11681e-08	248.39	74.9482	61.7903	40.615	107765	NM_013468
Apba1	40.1062	-1.31137	0.293615	-4.46631	7.95812e-06	4.01065e-05	15.6244	5.53673	38.8872	12.276	319924	NM_177034
Calhm2	44.8746	-1.20324	0.226112	-5.32144	1.02948e-07	7.80548e-07	24.3787	6.63095	52.4073	7.315	72691	NM_133746
Cd248	257.738	-1.79407	0.191834	-9.35218	8.58599e-21	5.61232e-19	102.246	19.0102	370.339	80.8051	70445	NM_054042
Cst6	188.108	1.19207	0.204804	5.82053	5.86607e-09	5.74673e-08	215.583	50.3337	92.9556	12.153	73720	NM_028623
Drap1	2852.65	1.01378	0.157266	6.44627	1.14638e-10	1.55286e-09	2689.96	323.982	1305.99	167.759	66556	NM_001291080
Dtx4	126.932	-1.06556	0.195164	-5.45981	4.76638e-08	3.89242e-07	70.7439	17.0873	147.545	19.4373	207521	NM_172442
E030003E18Rik	155.439	1.5544	0.197593	7.86667	3.64194e-15	1.05754e-13	148.998	35.6527	48.7823	8.12878	320092	NR_015502
Efemp2	85.1413	-1.42975	0.191283	-7.47452	7.74882e-14	1.79532e-12	39.2798	17.3002	105.236	18.9286	58859	NM_001164352
Fads1	218.968	-1.47652	0.134585	-10.9709	5.27661e-28	7.17292e-26	89.633	23.4285	250.515	32.5792	76267	NM_146094
Fads2	34.974	-2.3763	0.239526	-9.92083	3.37932e-23	2.85218e-21	12.3024	3.60534	59.7669	7.88935	56473	NM_019699
Fam111a	68.1449	-1.59599	0.235874	-6.76626	1.32149e-11	2.09273e-10	32.7643	7.2574	99.9473	43.4815	107373	NM_001346545
Fermt3	46.7917	-1.61191	0.311403	-5.1763	2.26332e-07	1.60069e-06	18.913	3.6217	55.9697	22.54	108101	NM_001362399
Fth1	13052.1	1.10073	0.116625	9.43823	3.79112e-21	2.62322e-19	11662.7	684.837	5321.72	165.696	14319	NM_010239
Gcnt1	22.7429	-2.3132	0.468346	-4.93909	7.84864e-07	4.96348e-06	3.7025	0.94222	23.9378	10.749	14537	NM_001136484
Gfra1	71.9167	-1.03668	0.192126	-5.39584	6.82026e-08	5.39197e-07	31.1269	10.5283	64.7662	12.16	14585	NM_001285457
Ifit2	75.0611	-1.31239	0.243848	-5.38199	7.36648e-08	5.77035e-07	35.5585	16.5028	83.1798	9.13158	15958	NM_001355262
Itprip	26.5252	-1.64618	0.324684	-5.0701	3.97597e-07	2.68107e-06	7.92893	6.15643	31.4756	6.78396	414801	NM_001001738
Loxl4	30.1308	-2.1887	0.330139	-6.62963	3.36525e-11	4.9373e-10	11.1071	7.99811	50.8489	11.2108	67573	NM_001164311
Lrrn4cl	222.957	-1.06476	0.117481	-9.06322	1.26653e-19	6.85043e-18	116.583	13.152	250.95	24.2087	68852	NM_001013019
Mpeg1	186.547	-1.58502	0.31384	-5.05041	4.40856e-07	2.94562e-06	66.4571	14.5581	192.818	106.064	17476	NM_001374668
Ms4a6b	46.7042	-1.90884	0.407855	-4.68019	2.86609e-06	1.6192e-05	12.7051	9.72113	51.8404	40.8202	69774	NM_027209
Myof	172.957	-1.24389	0.174948	-7.11004	1.16008e-12	2.18382e-11	66.098	15.5352	165.532	20.5473	226101	NM_001099634
Neat1	5518.32	1.32708	0.145308	9.13288	6.67031e-20	3.75321e-18	5228.71	981.498	2017.7	209.702	66961	NR_003513
Pank1	178.512	1.55557	0.148594	10.4686	1.20434e-25	1.28471e-23	189.089	15.8534	63.1545	10.4197	75735	NM_001114339
Pcsk5	59.9614	-1.38944	0.217864	-6.37756	1.79926e-10	2.35421e-09	28.6747	8.83389	68.2965	5.74674	18552	NM_001163144
Pcx	1900.11	-1.00255	0.177669	-5.64279	1.67315e-08	1.50564e-07	1015.1	224.006	1927.87	364.849	18563	NM_001162946
Pgam1	80.157	-1.24952	0.194509	-6.42396	1.32772e-10	1.77911e-09	32.5321	2.40825	80.3859	12.7014	18648	NM_023418
Pik3ap1	28.5521	-2.31581	0.427878	-5.41232	6.2214e-08	4.96703e-07	5.92136	3.78752	34.6748	15.3151	83490	NM_031376
Plce1	105	-1.22685	0.196345	-6.24845	4.14549e-10	5.02596e-09	42.1294	17.2985	104.967	5.71959	74055	NM_019588
Ppp1r3c	6615.48	2.81055	0.176424	15.9307	3.88068e-57	3.97408e-54	5666.48	580.653	775.645	167.905	53412	NM_016854
Psat1	70.0499	-1.73015	0.259225	-6.67432	2.48379e-11	3.72229e-10	25.7486	8.19386	83.7854	26.6711	107272	NM_001205339
Rab3il1	98.0107	-1.69798	0.170265	-9.97257	2.00953e-23	1.77405e-21	41.7963	12.8712	133.29	13.5902	74760	NM_001347429
Rcl1	99.9628	-1.11957	0.153209	-7.30745	2.72253e-13	5.72104e-12	55.9343	3.90389	122.954	6.00167	59028	NM_021525
Scd1	11617.6	-1.646	0.361533	-4.55283	5.29299e-06	2.78635e-05	3204.73	1535.68	9696.52	1970.98	20249	NM_009127
Scd2	732.137	-2.12364	0.189198	-11.2245	3.09298e-29	4.94909e-27	282.099	82.7332	1257.77	191.034	20250	NM_009128
Slc1a1	60.5698	1.6385	0.218831	7.48753	7.01805e-14	1.63836e-12	58.8529	21.8555	19.4798	3.72364	20510	NM_009199
Tmem132a	43.1273	-1.22039	0.260394	-4.68672	2.77612e-06	1.57358e-05	27.6446	5.83819	60.0262	10.9372	98170	NM_001378918
Unc93b1	225.414	-1.43717	0.191404	-7.50853	5.97964e-14	1.42408e-12	97.1405	32.125	259.181	58.2978	54445	NM_001161428
Usmg5	1406.19	1.25515	0.16987	7.38888	1.48076e-13	3.2634e-12	1302.56	163.668	521.688	19.9532	NA	NA
Zfand5	3091.75	1.13177	0.106297	10.6473	1.79514e-26	2.11052e-24	2770.37	305.858	1254.74	39.7353	22682	NM_009551
1500011K16Rik	706.66	1.39404	0.194205	7.17822	7.06264e-13	1.38203e-11	719.667	105.74	260.632	13.0384	NA	NA
1700037H04Rik	89.461	-1.82256	0.213008	-8.55631	1.16537e-17	4.86448e-16	41.1589	13.9778	138.192	32.256	67326	NM_001311138
4930402H24Rik	126.385	-1.26263	0.175876	-7.17907	7.01885e-13	1.37697e-11	58.6374	14.851	142.143	12.2276	228602	NM_001311147
Acss2	426.813	-1.32905	0.158178	-8.40224	4.38052e-17	1.68645e-15	244.023	11.8739	613.156	153.255	60525	NM_019811
Actc1	3807.34	-2.32844	0.284827	-8.17494	2.96021e-16	1.015e-14	1259.1	528.644	6742.17	1493.74	11464	NM_009608
Agpat2	318.147	-2.18345	0.330816	-6.6002	4.10615e-11	5.96732e-10	125.207	66.6797	537.15	61.0002	67512	NM_026212
Angptl2	875.011	-1.65147	0.100583	-16.419	1.39752e-60	1.95157e-57	399.521	45.2173	1308.65	121.314	26360	NM_011923
Apbb1ip	56.4268	-1.11208	0.243241	-4.57192	4.83286e-06	2.57144e-05	24.2396	4.92848	55.9568	22.7509	54519	NM_019456
Aplnr	104.098	-2.92601	0.433622	-6.74784	1.50057e-11	2.35207e-10	29.7314	6.80792	258.82	65.8376	23796	NM_011784
Atp5e	2970.32	1.58166	0.221813	7.13058	9.99456e-13	1.90953e-11	3079.65	616.785	983.887	110.753	67126	NM_025983
B230312C02Rik	114.446	-3.3624	0.233463	-14.4023	5.00749e-47	3.49636e-44	26.305	11.8682	267.5	61.0074	320485	NR_040745
Bcas1	20.4148	-2.15046	0.36266	-5.92968	3.03534e-09	3.12925e-08	6.13366	4.10434	22.9294	4.74925	76960	NM_001164369
Bcl2l1	252.753	1.06272	0.193897	5.48084	4.23318e-08	3.49978e-07	198.209	48.6476	102.953	15.6647	12048	NM_001289716
Bmf	71.1059	-1.40371	0.284372	-4.9362	7.96608e-07	5.03361e-06	29.7206	13.5193	94.9829	11.7555	171543	NM_001311140
C130080G10Rik	16.8297	-4.57793	0.61894	-7.3964	1.39931e-13	3.09724e-12	2.37263	2.38763	46.3395	19.217	100303644	NR_028422
C1qtnf4	50.0706	1.39477	0.272321	5.12178	3.02662e-07	2.07553e-06	56.6447	15.1352	20.5225	7.04497	67445	NM_026161
Camk1d	56.053	-1.49877	0.211446	-7.08817	1.35893e-12	2.51804e-11	19.6923	2.80881	57.5311	11.1627	227541	NM_001290374
Casc4	63.3182	-1.33982	0.233099	-5.74784	9.03895e-09	8.53919e-08	26.4846	10.7528	71.1099	7.73732	NA	NA
Ccdc141	38.6036	-1.39029	0.269368	-5.1613	2.45244e-07	1.71626e-06	19.7378	5.4705	50.219	4.79802	545428	NM_001025576
Ccdc3	145.976	-1.12984	0.23525	-4.8027	1.56539e-06	9.27698e-06	55.507	27.5986	122.77	7.04169	74186	NM_028804
Ccndbp1	235.42	1.2829	0.10996	11.667	1.87845e-31	3.4765e-29	247.397	39.0012	103.052	8.46406	17151	NM_001355127
Cd40	10.3803	-2.36575	0.508545	-4.65199	3.28751e-06	1.82374e-05	2.04632	1.26956	14.3903	4.28506	21939	NM_011611
Cd44	120.701	-1.51247	0.151096	-10.01	1.37817e-23	1.25266e-21	54.9434	7.88228	164.233	31.9147	12505	NM_001039150
Cdh4	81.9248	-1.35569	0.298915	-4.53535	5.75082e-06	3.00471e-05	38.4737	9.47758	94.6015	25.9148	12561	NM_001316723
Cebpb	437.974	1.82678	0.20409	8.95088	3.52659e-19	1.83013e-17	396.678	92.0507	114.426	14.2704	12608	NM_001287738
Cercam	42.0705	-2.17712	0.281063	-7.74604	9.48029e-15	2.52824e-13	17.0933	6.10101	72.5296	11.1788	99151	NM_207298
Chst14	33.3371	-1.67807	0.253825	-6.61112	3.81426e-11	5.57478e-10	13.529	4.35813	43.7174	4.5877	72136	NM_028117
Col5a1	634.603	-2.28139	0.195233	-11.6855	1.51253e-31	2.83341e-29	235.271	51.4082	1215.43	210.578	12831	NM_015734
Cpxm1	71.7564	-2.32358	0.241408	-9.6251	6.26435e-22	4.62628e-20	23.3587	6.01998	108.899	17.158	56264	NM_019696
Creb3l1	36.2277	-2.16447	0.334795	-6.46506	1.0126e-10	1.38755e-09	14.749	2.81326	59.8648	16.9904	26427	NM_011957
Cybrd1	9.25709	-4.37924	0.729735	-6.00114	1.95942e-09	2.10039e-08	0.906397	1.03964	18.6086	10.2149	73649	NM_028593
Cytip	37.9046	-2.71316	0.599951	-4.5223	6.11713e-06	3.17343e-05	9.98218	1.72535	60.3739	67.5185	227929	NM_139200
Dnm1	130.211	-1.04957	0.151942	-6.9077	4.92562e-12	8.26009e-11	65.9077	20.0844	139.38	15.2305	13429	NM_001301737
Dpp4	150.463	-2.09164	0.203064	-10.3004	7.01848e-25	6.91095e-23	42.9505	20.8127	182.741	28.125	13482	NM_001159543
E2f1	12.7535	-2.15112	0.405806	-5.30087	1.15254e-07	8.64885e-07	3.92988	2.38891	16.9579	2.80677	13555	NM_001291105
Edn3	9.51504	-4.87926	0.703158	-6.93906	3.94715e-12	6.7369e-11	0.971068	0.765999	26.2308	5.22109	13616	NM_007903
Epb4.1l1	218.673	-1.29125	0.148457	-8.69778	3.38433e-18	1.51124e-16	96.7615	26.3931	232.323	19.6821	NA	NA
Etl4	809.574	1.20282	0.128058	9.39275	5.84558e-21	3.95568e-19	775.446	46.4287	337.793	65.6999	208618	NM_001081006
Fam107b	82.6542	-1.69866	0.286656	-5.92578	3.10827e-09	3.198e-08	28.6972	10.9132	92.5414	43.2031	66540	NM_025626
Fam78a	168.075	-1.90005	0.19802	-9.59528	8.36907e-22	6.15107e-20	76.494	14.3385	298.953	50.0954	241303	NM_175511
Fam83d	25.2264	-2.58619	0.353097	-7.3243	2.40157e-13	5.07435e-12	8.66746	3.86298	51.8937	10.694	71878	NM_027975
Fap	104.456	-1.56496	0.128074	-12.2192	2.4555e-34	5.71498e-32	46.5759	5.84958	140.335	9.55708	14089	NM_007986
Fbln7	60.5781	-1.36059	0.204996	-6.63715	3.198e-11	4.71444e-10	26.319	9.89251	70.8547	12.5475	70370	NM_024237
Fbn1	1175.54	-1.85251	0.235746	-7.85809	3.90044e-15	1.1241e-13	450.973	153.912	1626.4	325.406	14118	NM_007993
Fcna	75.1866	-1.80856	0.316045	-5.72249	1.04972e-08	9.79633e-08	22.4081	12.9963	80.4389	12.3069	14133	NM_007995
Fkbp7	61.1786	-1.08994	0.216333	-5.03827	4.69771e-07	3.11578e-06	30.6722	10.9262	65.8993	15.2732	14231	NM_001355079
Frmd4a	97.7387	-1.60135	0.176813	-9.05677	1.34366e-19	7.24207e-18	41.9208	11.5292	132.074	15.0909	209630	NM_001177843
Frzb	62.4621	-2.39185	0.232845	-10.2723	9.39606e-25	9.13499e-23	22.6398	8.23398	132.384	36.0704	20378	NM_011356
Gdf5	8.07899	3.077	0.667872	4.60718	4.08172e-06	2.20152e-05	6.02838	2.35685	0.834576	1.0418	14563	NM_008109
Gm561	213.139	1.41569	0.172877	8.18899	2.63424e-16	9.1342e-15	223.247	39.0178	78.9161	8.20135	NA	NA
Hsd17b12	197.508	-1.21256	0.192544	-6.29756	3.02362e-10	3.77301e-09	95.943	25.1339	216.457	28.2988	56348	NM_019657
Immp1l	426.197	1.10198	0.15613	7.05806	1.68845e-12	3.06938e-11	400.619	50.3477	176.373	10.6409	66541	NM_028260
Itga6	312.973	-1.19082	0.118122	-10.0812	6.68706e-24	6.18795e-22	148.208	30.0234	357.852	22.1442	16403	NM_001277970
Itga8	42.771	-1.34454	0.231959	-5.79643	6.77399e-09	6.55436e-08	18.331	6.61288	47.5892	9.63671	241226	NM_001001309
Itih2	13.1992	-3.4958	0.610391	-5.72715	1.02132e-08	9.55451e-08	1.40519	0.968569	14.8269	9.00045	16425	NM_010582
Itih5	928.671	-1.60559	0.179615	-8.93904	3.92564e-19	2.01678e-17	334.769	101.227	1020	141.41	209378	NM_172471
Klhl23	117.92	-1.30243	0.152253	-8.55441	1.18476e-17	4.93202e-16	63.1379	4.54242	160.26	24.7889	277396	NM_001360394
Lbp	213.528	-1.01427	0.164185	-6.17758	6.50904e-10	7.58615e-09	91.2318	21.5605	184.276	17.7617	16803	NM_008489
Map1lc3a	1390.86	1.07474	0.141146	7.61442	2.64878e-14	6.63752e-13	1595.06	298.104	737.165	71.897	66734	NM_025735
Mapk8ip1	102.737	-1.50481	0.145708	-10.3276	5.28626e-25	5.27288e-23	55.4238	11.3834	151.607	19.8211	19099	NM_001202445
Mmp9	80.3275	-2.44664	0.482798	-5.06764	4.02789e-07	2.7137e-06	22.4699	15.1409	134.442	112.227	17395	NM_013599
Mpped2	20.321	1.39044	0.304147	4.5716	4.8401e-06	2.57351e-05	21.1644	8.2223	7.66881	3.5412	77015	NM_001143683
Mrc1	401.477	-2.01231	0.185259	-10.8621	1.74621e-27	2.2353e-25	113.645	32.8509	484.227	92.5346	17533	NM_008625
Napb	184.482	1.55653	0.18093	8.60292	7.77127e-18	3.35322e-16	201.239	27.3289	67.2131	12.6838	17957	NM_019632
Nkx2-2as	8.75961	6.21699	1.04424	5.95359	2.62331e-09	2.74314e-08	9.19019	6.96355	0.0727821	0.162746	NA	NA
Nop10	442.745	1.05848	0.142366	7.43495	1.04609e-13	2.37708e-12	478.169	73.0297	217.155	8.64905	66181	NM_025403
Olfm1	88.9608	-1.1938	0.217858	-5.47972	4.25992e-08	3.51733e-07	41.3079	8.88966	103.798	9.71834	56177	NM_001038612
Olfml2a	83.611	-1.09867	0.21894	-5.01812	5.21808e-07	3.42396e-06	32.132	11.1217	75.4426	8.84575	241327	NM_172854
Pamr1	105.265	-1.6088	0.181587	-8.85969	8.02357e-19	3.92516e-17	42.0866	8.77616	131.627	19.2075	210622	NM_173749
Pip4k2a	103.457	-1.52327	0.218408	-6.97444	3.07102e-12	5.33642e-11	46.4109	9.35368	133.925	26.436	18718	NM_001355146
Pkp4	440.032	1.13105	0.100369	11.2689	1.8689e-29	3.02192e-27	379.224	37.7896	173.007	15.4146	227937	NM_001362990
Plcb1	61.399	-1.64902	0.216002	-7.6343	2.27059e-14	5.75554e-13	21.622	8.23232	68.8681	5.5261	18795	NM_001145830
Prex1	162.18	-1.6695	0.197241	-8.4643	2.57706e-17	1.02821e-15	70.4477	18.4224	233.414	39.6184	277360	NM_177782
Prkra	41.0845	-1.26696	0.214198	-5.91492	3.32041e-09	3.40713e-08	19.4301	3.99379	47.6942	5.48715	23992	NM_011871
Ptges	80.3532	-2.00902	0.239389	-8.39229	4.76759e-17	1.82176e-15	34.0441	9.01817	131.08	9.42015	64292	NM_022415
Ptgis	53.134	-2.30133	0.248157	-9.27368	1.79834e-20	1.09187e-18	15.7347	4.42625	72.0117	7.00206	19223	NM_008968
Ptgs1	68.027	-1.0733	0.222589	-4.82189	1.42203e-06	8.51277e-06	31.0076	7.46337	69.2725	3.91923	19224	NM_008969
Ptpla	400.658	-1.11693	0.11716	-9.53341	1.52201e-21	1.08742e-19	265.108	25.0156	548.61	44.3411	NA	NA
Ptprj	133.528	-1.16884	0.190342	-6.14074	8.21403e-10	9.40207e-09	53.4968	11.2501	124.546	15.2288	19271	NM_001135657
Pygb	241.241	-1.03277	0.188301	-5.4847	4.14175e-08	3.43343e-07	98.5084	33.7137	208.317	30.1361	110078	NM_153781
Ralgds	171.211	-1.56157	0.169706	-9.20163	3.52551e-20	2.05914e-18	76.1078	14.4903	238.486	34.0591	19730	NM_001145834
Rassf2	159.623	-1.59303	0.192814	-8.26199	1.43265e-16	5.11789e-15	55.5186	10.4001	164.425	51.6881	215653	NM_001362866
Rcn1	130.341	-1.52074	0.195933	-7.76151	8.3926e-15	2.27772e-13	55.5455	18.0806	162.715	20.4218	19672	NM_009037
Romo1	714.895	1.64157	0.164141	10.0009	1.50958e-23	1.36403e-21	770.2	99.8845	236.404	22.7465	67067	NM_001164216
Rps21	1609.19	1.08076	0.169017	6.39437	1.61215e-10	2.13301e-09	1407.84	235.665	636.608	90.6711	66481	NM_001355516
Rrbp1	760.419	-1.03867	0.0990925	-10.4818	1.0469e-25	1.12458e-23	393.328	41.5066	826.591	70.1002	81910	NM_024281
Sardh	39.3424	-1.76214	0.270101	-6.52401	6.84505e-11	9.69096e-10	15.062	8.12827	50.2715	8.59437	192166	NM_138665
Scand1	138.487	1.35763	0.292259	4.6453	3.39585e-06	1.87706e-05	157.467	15.2904	60.2144	34.7875	19018	NM_020255
Serping1	1370.38	-1.04859	0.121564	-8.62582	6.36358e-18	2.77701e-16	620.607	97.4533	1259.38	89.9276	12258	NM_009776
Sfpi1	42.5875	-1.63194	0.270664	-6.02942	1.64552e-09	1.78762e-08	17.9017	3.9525	53.709	22.2135	NA	NA
Siglec1	88.8626	-2.67417	0.465062	-5.75014	8.91696e-09	8.43952e-08	16.4493	10.4081	110.403	51.5748	20612	NM_011426
Slc24a3	63.3049	-1.58089	0.263129	-6.00806	1.87758e-09	2.02113e-08	23.0178	6.57952	72.9876	16.6163	94249	NM_001356497
Snord17	43.3045	1.96985	0.284039	6.93516	4.05754e-12	6.90016e-11	89.1111	31.9211	21.5893	4.97259	100313519	NR_030762
Spata5l1	39.6945	1.24703	0.234985	5.30683	1.1155e-07	8.40374e-07	41.9593	7.4682	17.989	6.86351	214616	NM_001033256
St6galnac4	147.138	-1.06815	0.146665	-7.28292	3.26672e-13	6.75371e-12	87.6497	17.1862	186.832	17.6749	20448	NM_001276425
Stk39	47.7531	-1.19166	0.208937	-5.70343	1.17419e-08	1.0872e-07	22.1243	3.06671	51.2036	6.16309	53416	NM_016866
Stxbp1	68.0782	-1.22632	0.165958	-7.38934	1.47558e-13	3.25666e-12	29.5566	9.19775	71.5658	10.2783	20910	NM_001113569
Sulf2	284.619	-1.25037	0.176009	-7.10401	1.21187e-12	2.26191e-11	106.956	33.6385	256.47	19.9608	72043	NM_001252578
Tmem141	88.0489	1.22842	0.173683	7.07277	1.5187e-12	2.78387e-11	103.739	16.0966	41.6189	5.607	51875	NM_001040130
Tor4a	53.5595	-1.51581	0.313335	-4.83767	1.3137e-06	7.90122e-06	19.9219	10.3966	64.6932	25.3386	227612	NM_146115
Tspan18	55.1811	-1.99579	0.244789	-8.15308	3.54763e-16	1.19729e-14	19.209	7.53496	78.5662	12.2253	241556	NM_183180
Tspyl3	13.1104	-2.68932	0.515109	-5.22088	1.78072e-07	1.29027e-06	2.48226	2.43432	19.6996	7.04226	241732	NM_198617
Ttn	171017	1.0654	0.181317	5.87591	4.20524e-09	4.23585e-08	162715	27605.2	79856.7	21679.2	22138	NM_001385708
Vav2	37.0419	-1.95861	0.266811	-7.34083	2.12271e-13	4.51621e-12	12.2837	3.38534	46.8289	6.76784	22325	NM_009500
Wipf1	212.967	-1.03065	0.139547	-7.38572	1.51632e-13	3.33221e-12	108.128	5.98043	224.43	31.6372	215280	NM_001289722
Wisp2	23.4535	-1.85689	0.398648	-4.65797	3.19339e-06	1.77924e-05	7.31083	4.09122	29.7069	8.27783	NA	NA
Zbp1	25.5307	-3.04773	0.526381	-5.78997	7.03976e-09	6.78831e-08	4.91652	2.35281	35.3455	13.8712	58203	NM_001139519
A930005H10Rik	68.4449	1.00977	0.204864	4.92899	8.26572e-07	5.20155e-06	77.6655	12.951	36.9928	5.33408	68161	NR_015487
Amy1	604.412	1.76653	0.117524	15.0313	4.57986e-51	3.9084e-48	571.381	31.5324	165.067	12.9158	11722	NM_001110505
Ankrd35	10.4725	-1.99716	0.406528	-4.91273	8.98183e-07	5.61538e-06	3.5542	2.09904	15.379	2.0947	213121	NM_001081139
Atp8b2	159.426	-1.52611	0.190789	-7.99896	1.25472e-15	3.91742e-14	69.9007	30.8256	203.624	20.1909	54667	NM_001081182
B3galnt1	41.7322	-1.42509	0.241355	-5.90454	3.53638e-09	3.61666e-08	17.7403	2.87677	48.7581	10.7458	26879	NM_020026
Bcar3	66.0879	-1.16282	0.210815	-5.51584	3.47124e-08	2.92655e-07	30.447	10.0683	76.6279	5.1622	29815	NM_001355264
Bche	182.601	-1.07426	0.184618	-5.81885	5.92524e-09	5.79361e-08	83.1039	21.3445	168.281	20.2704	12038	NM_009738
Bdh2	15.6931	-1.7782	0.389005	-4.57116	4.85041e-06	2.57721e-05	4.08288	1.36932	16.1648	3.21576	69772	NM_001172055
Bola1	156.454	1.00131	0.156108	6.4142	1.41564e-10	1.88764e-09	158.091	30.3849	75.3034	7.22129	69168	NM_026975
Capza1	174.343	-1.01549	0.140271	-7.23951	4.50313e-13	9.08969e-12	86.987	23.2362	174.487	34.4088	12340	NM_001355044
Ccrn4l	278.291	1.40469	0.20246	6.9381	3.9741e-12	6.77538e-11	287.917	97.4963	106.014	23.5688	NA	NA
Cd53	101.951	-1.96667	0.398739	-4.93224	8.12936e-07	5.12413e-06	33.741	13.0505	127.95	95.2735	12508	NM_007651
Chia	7.15963	5.09643	0.911187	5.59318	2.22949e-08	1.96146e-07	9.46878	3.10927	0.216621	0.324549	NA	NA
Cks1b	24.1042	-1.37127	0.291604	-4.70251	2.56981e-06	1.46529e-05	9.3498	2.7771	24.1904	2.89101	54124	NM_016904
Col11a1	60.2939	-5.17303	0.377141	-13.7164	8.09425e-43	3.36043e-40	5.97012	4.06926	187.511	78.4342	12814	NM_007729
Csde1	8739.74	1.01313	0.0950933	10.6541	1.6686e-26	1.98692e-24	7596.18	470.881	3689.05	290.088	229663	NM_001161854
Csf1	187.516	-1.08772	0.145556	-7.47288	7.84596e-14	1.81509e-12	94.8015	16.17	206.508	13.221	12977	NM_001113529
Ctsk	103.787	-2.5202	0.267501	-9.42128	4.45633e-21	3.05597e-19	36.4009	17.5234	203.376	83.2209	13038	NM_007802
Ctss	225.727	-1.59607	0.328622	-4.85687	1.19259e-06	7.24943e-06	83.0289	27.3762	249.747	142.558	13040	NM_001267695
Cyr61	451.565	1.03487	0.156764	6.60145	4.07161e-11	5.92272e-10	414.713	93.4912	208.161	34.375	NA	NA
Dclk1	53.1977	-1.88693	0.250804	-7.52352	5.33189e-14	1.27575e-12	18.6666	6.03186	74.6893	19.8254	13175	NM_001111051
Elovl6	224.377	-3.92592	0.622008	-6.31168	2.7602e-10	3.46967e-09	37.459	39.1435	519.369	83.4882	170439	NM_130450
Enpep	123.66	-2.09203	0.18288	-11.4393	2.65945e-30	4.48921e-28	41.4832	17.3075	170.79	28.3446	13809	NM_007934
F3	91.7642	-1.07385	0.232807	-4.61261	3.97638e-06	2.15226e-05	44.5049	21.3985	95.3529	7.02281	14066	NM_010171
Fabp5	153.633	-1.88196	0.209892	-8.96633	3.06559e-19	1.60172e-17	66.9784	13.8973	247.292	48.2696	16592	NM_001272097
Fam198b	211.454	-1.10668	0.133047	-8.31791	8.95314e-17	3.28232e-15	103.835	17.809	224.949	16.5073	NA	NA
Fam212b	84.285	-1.13831	0.218364	-5.21289	1.85925e-07	1.34084e-06	49.0841	24.7812	110.73	8.67615	NA	NA
Fcgr1	14.2644	-2.4771	0.533621	-4.64207	3.44944e-06	1.90326e-05	3.68319	1.74641	17.6244	5.39735	14129	NM_010186
Fcrls	85.4057	-2.46125	0.3048	-8.07495	6.7502e-16	2.16924e-14	17.7624	10.4817	125.658	24.278	80891	NM_030707
Foxo1	806.896	1.75043	0.252089	6.94371	3.81934e-12	6.52602e-11	780.697	154.692	228.408	17.0217	56458	NM_019739
Frem2	15.1343	-2.15256	0.366749	-5.8693	4.3765e-09	4.38535e-08	6.03333	2.20372	27.4167	6.58405	242022	NM_172862
Gm15417	155.363	1.09814	0.172542	6.36449	1.95933e-10	2.54631e-09	179.336	25.7647	78.4559	14.2262	545539	NR_040403
Gm5105	47.4298	-1.65809	0.29028	-5.71204	1.11628e-08	1.03609e-07	23.2245	13.1315	77.3153	8.46767	329763	NM_177860
Golim4	213.642	-1.61851	0.116336	-13.9123	5.33171e-44	2.73002e-41	93.083	12.072	289.217	16.2899	73124	NM_001291069
Gpsm2	25.6852	-2.68516	0.303567	-8.84538	9.12199e-19	4.43427e-17	8.06025	3.78574	46.9205	7.09922	76123	NM_029522
Hltf	73.0077	-1.06214	0.201159	-5.28008	1.29129e-07	9.58701e-07	37.3118	10.6136	77.9073	11.079	20585	NM_001355097
Igsf10	68.2959	-3.1928	0.310426	-10.2852	8.21516e-25	8.03778e-23	14.8793	11.3965	137.234	20.364	242050	NM_001162884
Igsf3	58.1653	-1.57125	0.23308	-6.74125	1.57028e-11	2.44883e-10	28.172	5.1927	87.1794	13.6708	78908	NM_207205
Kcnab1	67.8296	1.1884	0.254799	4.66406	3.10026e-06	1.73301e-05	63.5984	22.8875	27.2409	5.51064	16497	NM_001289450
Lix1l	108.099	-1.14235	0.197347	-5.78852	7.10098e-09	6.83447e-08	49.8414	18.7038	111.854	9.32502	280411	NM_001163170
Lphn2	140.546	-1.08366	0.161449	-6.71211	1.91836e-11	2.92921e-10	70.2255	11.1201	164.592	16.9874	NA	NA
Magi3	68.0021	-1.52139	0.190448	-7.98848	1.36609e-15	4.23928e-14	23.8738	4.95288	78.4433	8.6093	99470	NM_001159354
Manba	64.1086	-1.26282	0.202173	-6.24624	4.20453e-10	5.09352e-09	29.7279	10.6576	75.3115	10.8699	110173	NM_027288
Mme	130.255	-1.5901	0.181241	-8.77342	1.73314e-18	8.04314e-17	35.2531	12.0372	118.377	12.1443	17380	NM_001289462
Mov10	23.7299	-1.94459	0.345082	-5.63515	1.74903e-08	1.56658e-07	7.17387	3.70801	29.4488	6.28653	17454	NM_001163440
Mrps21	683.18	1.05586	0.151348	6.97638	3.02875e-12	5.27489e-11	724.044	75.316	334.39	9.63642	66292	NM_001355759
Negr1	37.7273	-1.62717	0.311218	-5.22838	1.71006e-07	1.24259e-06	10.167	4.86121	28.5087	8.60962	320840	NM_001039094
Nhlrc3	21.2297	-1.39327	0.293098	-4.7536	1.99822e-06	1.16323e-05	8.69992	1.51721	21.7618	4.57178	212114	NM_172501
Olfml3	123.402	-2.12227	0.216163	-9.81789	9.42931e-23	7.66368e-21	46.6842	15.027	192.731	23.3478	99543	NM_133859
P2ry12	11.669	-2.4236	0.533603	-4.54195	5.5735e-06	2.91802e-05	2.41078	0.850832	12.838	4.29524	70839	NM_001357007
P2ry13	10.8423	-2.63608	0.594238	-4.43607	9.16147e-06	4.55877e-05	2.67009	3.00827	17.4594	15.0685	74191	NM_028808
Pag1	71.212	-1.52519	0.237103	-6.43262	1.25424e-10	1.6856e-09	28.7409	13.1596	84.0099	16.6131	94212	NM_001195031
Papss1	110.616	-1.01323	0.174604	-5.80298	6.51447e-09	6.33289e-08	50.3206	16.3059	112.516	15.1102	23971	NM_001289477
Pcdh18	47.4403	-1.56515	0.263941	-5.9299	3.03113e-09	3.12701e-08	21.5966	12.4012	66.6092	6.18378	73173	NM_130448
Pde7a	1210.17	1.91271	0.103124	18.5477	8.51552e-77	2.61614e-73	1140.69	68.1473	292.887	38.0059	18583	NM_001122759
Pdgfc	32.9734	-1.78017	0.299136	-5.95104	2.66447e-09	2.78239e-08	10.164	3.23976	32.8015	4.34882	54635	NM_001357746
Pla2g12a	506.875	1.05181	0.110536	9.51554	1.80771e-21	1.28556e-19	522.079	60.3634	247.972	19.1523	66350	NM_001286948
Pmp2	17.5621	-3.38176	0.466647	-7.24693	4.26323e-13	8.63951e-12	4.1129	2.06105	37.4047	17.1464	18857	NM_001030305
Postn	506.263	-4.26108	0.337698	-12.618	1.67954e-36	4.86781e-34	63.8941	34.3501	1239.53	301.918	50706	NM_001198765
Ptger3	36.6057	-3.46267	0.313107	-11.0591	1.98132e-28	2.79221e-26	5.90659	4.60474	63.0949	6.74995	19218	NM_001359745
Ptgfrn	316.311	-1.4785	0.138865	-10.647	1.79987e-26	2.11052e-24	142.052	31.7674	427.536	26.6708	19221	NM_011197
Ptx3	44.9664	-1.61569	0.225076	-7.17843	7.05172e-13	1.38165e-11	24.3728	7.95025	73.0238	16.2048	19288	NM_008987
Rap2b	62.8882	-1.30673	0.213213	-6.12877	8.85605e-10	1.00769e-08	27.5043	8.15953	73.8835	15.3707	74012	NM_028712
Riiad1	27.7548	1.73821	0.317436	5.47577	4.35614e-08	3.59177e-07	42.7452	16.6156	11.6313	2.93999	66353	NM_025506
Rnpc3	132.907	1.3495	0.157698	8.55751	1.15333e-17	4.82731e-16	134.615	24.3706	51.4395	9.73972	67225	NM_001038696
Rorc	553.574	1.32298	0.145534	9.09054	9.85515e-20	5.46516e-18	528.853	28.0874	207.76	31.7079	19885	NM_001293734
Rpl22l1	265.747	1.41144	0.243358	5.79985	6.63724e-09	6.4406e-08	273.744	35.766	101.617	11.4288	68028	NM_001347226
Sec24d	141.849	-1.39023	0.200464	-6.93505	4.06077e-12	6.90016e-11	60.3907	21.4405	167.254	13.2062	69608	NM_027135
Sema4a	79.0388	-1.44892	0.186937	-7.75084	9.12855e-15	2.44401e-13	33.4717	4.6127	90.3092	27.2583	20351	NM_001163489
Sfrp2	94.36	-3.2116	0.236135	-13.6007	3.96676e-42	1.60351e-39	18.137	3.24521	175.313	21.487	20319	NM_009144
Sgms2	39.8082	-2.31493	0.415168	-5.5759	2.46259e-08	2.14931e-07	9.27447	2.53692	41.3973	17.2372	74442	NM_001379582
Shox2	17.4473	-2.24131	0.377667	-5.93461	2.94539e-09	3.04879e-08	4.74169	2.78423	22.0373	8.30383	20429	NM_001302357
Slc25a24	68.7895	-1.17883	0.204235	-5.77194	7.83632e-09	7.49992e-08	34.5159	9.04612	77.0701	18.4203	229731	NM_172685
Snhg8	165.483	1.24336	0.217286	5.72225	1.05121e-08	9.80429e-08	149.903	39.5129	60.1121	11.1333	69895	NR_028574
Sypl2	3313.52	-1.07459	0.10134	-10.6038	2.86176e-26	3.23231e-24	1910.72	185.972	4075.78	569.093	17306	NM_008596
Tdrkh	48.7357	1.61552	0.233863	6.90796	4.91668e-12	8.25411e-11	49.6833	8.03292	15.3769	7.48898	72634	NM_001357711
Thbs3	95.4185	-1.85692	0.224162	-8.28382	1.19287e-16	4.30133e-15	38.9924	12.88	134.154	23.9856	21827	NM_013691
Tnfaip8l2	23.7622	-2.22589	0.450461	-4.94135	7.75824e-07	4.91379e-06	6.97908	5.06753	32.9653	15.1312	69769	NM_027206
Ugt8a	32.793	-1.86891	0.286258	-6.52876	6.63185e-11	9.43258e-10	15.1108	3.69076	55.8301	17.8412	22239	NM_011674
Vangl1	42.6035	-1.25833	0.254577	-4.94284	7.69944e-07	4.88119e-06	21.1403	5.7527	50.7346	6.70615	229658	NM_001165951
2010003O02Rik	98.8717	1.33619	0.228935	5.83654	5.32955e-09	5.27835e-08	114.22	27.1877	42.0727	6.07535	NA	NA
Aco1	311.467	-1.146	0.143998	-7.95849	1.74153e-15	5.30786e-14	153.327	43.7072	343.722	22.1225	11428	NM_007386
Adamtsl1	146.9	-1.1793	0.190543	-6.18913	6.04977e-10	7.08312e-09	62.2001	11.314	155.592	17.7722	77739	NM_001368621
Ak4	107.144	1.22768	0.194357	6.31663	2.67321e-10	3.37968e-09	95.7511	22.2473	43.1488	6.22939	11639	NM_001177602
Ankrd6	36.4289	1.83617	0.256177	7.16757	7.63423e-13	1.48819e-11	42.0114	13.6254	11.3848	1.05158	140577	NM_001012450
Asap3	54.1622	-1.88575	0.219303	-8.59883	8.05328e-18	3.46516e-16	21.0963	7.10773	79.6197	13.6068	230837	NM_001008232
C1qb	346.911	-1.0913	0.207435	-5.26094	1.43321e-07	1.05742e-06	130.631	38.946	299.367	58.9474	12260	NM_009777
C1qc	327.819	-1.01587	0.208832	-4.86456	1.14711e-06	7.00072e-06	135.64	51.1687	296.451	51.514	12262	NM_007574
Camta1	217.492	1.25221	0.151826	8.24764	1.61559e-16	5.67898e-15	221.581	22.1575	97.7247	13.7596	100072	NM_001081557
Cap1	464.758	-1.01451	0.147008	-6.90108	5.16086e-12	8.60759e-11	230.576	33.3505	470.266	114.924	12331	NM_001301067
Catsper4	10.749	4.19215	0.670033	6.25662	3.93404e-10	4.79229e-09	13.8694	6.25773	0.637388	0.883637	329954	NM_001130030
Chchd7	155.846	1.04807	0.199766	5.24651	1.55008e-07	1.13873e-06	173.652	31.5347	78.9323	8.82829	66433	NM_001190322
Chd7	424.669	1.21212	0.148162	8.18102	2.81447e-16	9.71529e-15	404.4	51.0099	172.659	24.315	320790	NM_001033395
Cited4	56.0199	-2.56873	0.226005	-11.3658	6.18921e-30	1.02228e-27	20.1648	6.5571	120.068	25.9172	56222	NM_019563
Cnksr1	519.595	1.96128	0.137812	14.2316	5.83343e-46	3.58429e-43	557.536	82.908	141.698	32.4552	194231	NM_001081047
Col15a1	527.351	-2.29085	0.28941	-7.91559	2.46082e-15	7.36854e-14	176.02	54.9357	924.041	208.667	12819	NM_009928
Col16a1	87.6061	-2.17154	0.245905	-8.83081	1.03916e-18	5.00393e-17	34.6546	11.591	166.145	37.3158	107581	NM_028266
Col27a1	26.6295	-1.98866	0.329115	-6.04245	1.51789e-09	1.66307e-08	9.41858	3.66889	44.5695	14.594	373864	NM_025685
Col8a2	19.7715	-3.62886	0.439101	-8.26431	1.40506e-16	5.03102e-15	3.31449	2.30728	38.5195	5.45408	329941	NM_199473
D4Wsu53e	1971.02	1.16238	0.116867	9.94613	2.62171e-23	2.28819e-21	1876.24	159.5	802.228	99.1753	NA	NA
Ddx58	92.5958	-1.36397	0.214555	-6.35722	2.05442e-10	2.65416e-09	43.5857	6.63072	109.635	22.8832	230073	NM_172689
Dhcr24	114.078	-1.89337	0.226956	-8.34245	7.27664e-17	2.71302e-15	42.0638	11.9697	169.126	39.9632	74754	NM_053272
Dock7	133.603	-1.01769	0.160197	-6.35274	2.11518e-10	2.72121e-09	71.857	17.9875	142.996	14.0086	67299	NM_001290636
E2f2	36.5306	-1.22245	0.2426	-5.03896	4.68076e-07	3.10857e-06	23.329	7.67279	55.7947	13.9309	242705	NM_001305399
Efhd2	160.738	-1.08307	0.17202	-6.29618	3.05077e-10	3.80381e-09	80.7961	14.3348	177.266	41.8668	27984	NM_025994
Eno1	54.4315	-2.08352	0.264556	-7.87552	3.39323e-15	9.89058e-14	6.26058	2.5908	31.0095	1.72676	13806	NM_001379127
Ephb2	15.3428	-2.98555	0.547961	-5.44848	5.08029e-08	4.12247e-07	2.69537	1.91918	23.0814	4.74798	13844	NM_001290753
Fabp3	2556.16	1.25402	0.104467	12.004	3.38458e-33	7.22091e-31	2402.93	362.999	998.556	83.6705	14077	NM_010174
Fbxo10	42.9118	-1.32008	0.262906	-5.02109	5.13782e-07	3.37996e-06	17.1369	5.48649	47.2477	10.525	269529	NM_001024142
Fhl3	1629.01	1.1578	0.115129	10.0566	8.59424e-24	7.90516e-22	1442.17	163.299	649.189	89.8988	14201	NM_010213
Foxo6	43.3085	-2.69909	0.336721	-8.01581	1.09415e-15	3.45119e-14	14.096	5.67583	104.66	32.0657	329934	NM_194060
Frem1	11.9701	-3.05086	0.531084	-5.74459	9.21457e-09	8.67842e-08	2.87373	1.64562	28.079	10.4177	329872	NM_001198811
Gabrr1	12.3851	2.30421	0.493786	4.66642	3.06498e-06	1.716e-05	9.11515	3.09685	2.39974	2.13378	14408	NM_008075
Gale	19.2125	-2.57601	0.441784	-5.83092	5.51232e-09	5.44427e-08	5.83757	6.63581	32.591	5.8185	74246	NM_001356493
Gem	34.1247	-1.85489	0.332156	-5.58438	2.34541e-08	2.05756e-07	10.4175	3.81329	40.002	5.11564	14579	NM_010276
Glipr2	54.9765	-1.65835	0.247387	-6.70344	2.03569e-11	3.09606e-10	25.2493	6.49793	75.1001	20.8685	384009	NM_027450
Gm5860	28.3732	1.36575	0.305903	4.46463	8.02055e-06	4.04079e-05	37.4801	9.4606	13.114	4.43653	545641	NR_040659
Gng10	61.2405	-1.40457	0.258547	-5.43253	5.55597e-08	4.48242e-07	26.288	6.19715	69.7814	21.3297	14700	NM_025277
Gpr153	82.9224	-1.80403	0.164648	-10.9569	6.15481e-28	8.22122e-26	35.7622	6.7341	128.361	18.9269	100129	NM_001374784
Hook1	318.91	1.3254	0.0982943	13.4839	1.94425e-41	7.28429e-39	285.9	28.5466	114.228	13.9087	77963	NM_030014
Kazn	35.4803	-1.43777	0.313107	-4.59195	4.39129e-06	2.3569e-05	16.2309	11.2998	42.8438	10.1941	71529	NM_001109684
Kcnab2	31.3512	-2.34649	0.375132	-6.25511	3.97239e-10	4.83111e-09	9.96822	2.54083	46.8105	27.9453	16498	NM_001252654
Laptm5	248.31	-1.63044	0.300639	-5.42327	5.85185e-08	4.69892e-07	93.5491	33.3913	288.631	118.831	16792	NM_010686
Lepre1	103.432	-1.21789	0.132801	-9.17078	4.69604e-20	2.70172e-18	55.7495	6.64017	135.963	18.5552	NA	NA
Lpar1	134.042	-1.46755	0.147559	-9.94547	2.63913e-23	2.29038e-21	61.9852	8.70007	175.283	22.6472	14745	NM_001290486
Lurap1l	25.6586	-1.57524	0.293019	-5.37591	7.61952e-08	5.94431e-07	12.5669	4.80075	36.7902	5.4843	52829	NM_026821
Lyn	149.893	-1.13112	0.183354	-6.16905	6.87016e-10	8.00095e-09	65.4817	14.9543	150.333	41.1174	17096	NM_001111096
Man1c1	95.4778	-1.22261	0.161512	-7.56977	3.73896e-14	9.23378e-13	40.7333	10.4069	103.667	13.4689	230815	NM_207237
Map3k6	186.523	1.88743	0.222028	8.50084	1.88222e-17	7.60861e-16	147.061	35.5017	42.368	12.5336	53608	NM_016693
Megf9	65.8914	-1.42642	0.206725	-6.90012	5.19598e-12	8.65678e-11	24.1903	10.2104	68.054	11.1408	230316	NM_172694
Mfap2	36.7883	-3.37853	0.331872	-10.1802	2.43001e-24	2.34764e-22	6.81943	3.9477	84.7351	21.8024	17150	NM_001161799
Mmp23	30.8924	-1.80197	0.340505	-5.29206	1.20948e-07	9.03201e-07	11.1269	7.12359	42.0181	6.54998	26561	NM_001320235
Musk	214.331	1.72576	0.153948	11.21	3.64132e-29	5.64993e-27	241.234	24.92	74.4292	10.0752	18198	NM_001037127
Ndufb6	782.378	1.23609	0.16616	7.43916	1.01326e-13	2.30589e-12	890.54	157.848	363.877	21.4587	230075	NM_001033305
Nudt2	121.734	1.00469	0.126113	7.96661	1.63085e-15	5.02034e-14	132.374	11.9526	63.647	6.74276	66401	NM_025539
Paqr7	65.5355	-1.03425	0.169838	-6.08965	1.13155e-09	1.2669e-08	40.8683	10.7473	84.9982	8.35009	71904	NM_001285845
Pax7	18.4862	-1.90067	0.346025	-5.49288	3.95438e-08	3.29054e-07	8.43571	3.61182	33.4946	8.0884	18509	NM_011039
Pdpn	95.7332	-1.299	0.184967	-7.02286	2.17377e-12	3.8827e-11	46.4419	14.4955	108.782	19.0223	14726	NM_001290822
Pgd	397.955	-1.55743	0.160592	-9.69809	3.07189e-22	2.336e-20	191.781	38.3702	552.196	112.684	110208	NM_001081274
Pik3cd	167.449	-1.00811	0.163884	-6.15139	7.68082e-10	8.85109e-09	99.1407	6.44577	193.872	56.1179	18707	NM_001029837
Pla2g2d	51.9819	-1.90723	0.411358	-4.63642	3.5449e-06	1.94754e-05	11.0759	5.02096	52.1984	28.0555	18782	NM_001347230
Pla2g5	50.5611	2.79126	0.24327	11.4739	1.78392e-30	3.07897e-28	51.1137	12.5216	7.57486	2.59775	18784	NM_001122954
Plin2	448.44	-1.04772	0.155631	-6.73208	1.67254e-11	2.59514e-10	247.673	44.2871	510.745	129.789	11520	NM_007408
Pnrc1	906.278	1.45913	0.125088	11.6648	1.92778e-31	3.52532e-29	913.716	33.0291	322.86	34.7177	108767	NM_001033225
Podn	171.867	-1.05442	0.119816	-8.80028	1.36471e-18	6.39126e-17	84.9058	12.7507	181.478	24.718	242608	NM_001285956
Prkcz	38.3765	1.91762	0.258058	7.43095	1.07822e-13	2.43925e-12	32.4933	12.8322	8.87813	2.82807	18762	NM_001039079
Ptafr	33.6478	-2.84948	0.377395	-7.55039	4.33949e-14	1.05976e-12	7.91233	6.07889	51.9128	15.7718	19204	NM_001081211
Ptgr1	18.3358	-1.88999	0.39886	-4.73849	2.15321e-06	1.24438e-05	6.3371	5.84259	27.8737	3.67182	67103	NM_025968
Ptplad2	30.564	-1.74385	0.283759	-6.14554	7.9694e-10	9.14932e-09	11.6967	3.34823	39.1396	8.7756	NA	NA
Ptprd	105.042	-1.06126	0.141076	-7.5226	5.36967e-14	1.28279e-12	56.1664	12.8781	116.448	7.88624	19266	NM_001014288
Ptprf	118.346	-1.30416	0.250594	-5.20428	1.94755e-07	1.39692e-06	48.8366	15.9084	130.854	20.6079	19268	NM_011213
Rbp7	42.5125	1.77265	0.33458	5.29815	1.16982e-07	8.74861e-07	33.5047	6.55867	10.0958	5.19174	63954	NM_022020
Reck	92.4635	-1.74493	0.198325	-8.79834	1.38857e-18	6.48325e-17	32.7054	12.8778	109.429	8.50883	53614	NM_016678
Rmrp	637.551	1.72733	0.201944	8.55351	1.19405e-17	4.95725e-16	926.139	237.266	269.277	33.0256	19782	NR_001460
Rps20	2364.18	1.38133	0.14945	9.24278	2.40179e-20	1.44682e-18	2394.38	272.2	882.088	156.902	67427	NM_026147
Rps6ka1	102.824	-1.0045	0.185114	-5.42639	5.75044e-08	4.62474e-07	55.2364	18.8288	118.852	16.3077	20111	NM_001285505
Sepn1	120.346	-1.29344	0.195793	-6.60618	3.94353e-11	5.7475e-10	59.3828	7.47199	140.105	16.201	NA	NA
Slc25a34	178.885	2.42602	0.1784	13.5988	4.07278e-42	1.60415e-39	198.337	33.729	37.4304	7.43565	384071	NM_001013780
Slc2a5	7.80201	-7.36691	0.998013	-7.38157	1.56435e-13	3.42057e-12	0	0	26.9453	11.7964	56485	NM_019741
Snhg3	45.3114	1.45287	0.233687	6.21717	5.06192e-10	6.05107e-09	54.6364	9.95585	19.7711	3.56556	399101	NR_002904
Snx30	72.2252	-1.01437	0.148498	-6.83086	8.44067e-12	1.36914e-10	37.4401	6.56982	77.4419	7.20657	209131	NM_172468
Susd1	16.49	-1.8531	0.411695	-4.50115	6.75881e-06	3.46883e-05	4.22207	3.46962	16.4884	5.77348	634731	NM_001163288
Svep1	351.556	-1.04136	0.199311	-5.22479	1.74348e-07	1.26448e-06	150.804	60.3342	308.023	40.8178	64817	NM_022814
Themis2	37.0597	-1.44449	0.30694	-4.7061	2.52504e-06	1.44083e-05	19.0845	7.29282	48.6405	15.2144	230787	NM_001033308
Tm2d1	234.259	1.16991	0.160325	7.29713	2.93972e-13	6.14382e-12	261.114	21.8724	111.731	10.9316	94043	NM_053157
Tnc	115.149	-3.31472	0.281938	-11.7569	6.50822e-32	1.29835e-29	21.3969	13.8951	238.598	69.3702	21923	NM_001369211
Tnfrsf1b	116.461	-1.50221	0.18286	-8.21507	2.12037e-16	7.369e-15	44.913	13.0969	136.571	36.2262	21938	NM_011610
Trabd2b	69.5911	-1.35087	0.263203	-5.13243	2.86032e-07	1.96852e-06	34.992	12.9383	86.0981	10.0943	666048	NM_001085549
Trim63	5029.39	1.87152	0.169083	11.0686	1.78112e-28	2.53331e-26	4018.62	954.263	1094.03	146.263	433766	NM_001039048
Zfp593	44.6882	1.07262	0.224523	4.77732	1.77644e-06	1.04232e-05	51.7417	12.5147	22.8677	3.48569	68040	NM_024215
0610040J01Rik	92.4862	1.67769	0.172522	9.72449	2.3709e-22	1.82097e-20	97.8356	16.8106	31.3982	5.84317	76261	NM_029554
2410137F16Rik	39.8654	3.3921	0.305233	11.1132	1.08264e-28	1.59908e-26	58.0599	17.9946	5.774	1.98213	NA	NA
A830010M20Rik	75.6893	-1.22959	0.205991	-5.96913	2.38529e-09	2.51651e-08	40.8639	13.0392	105.886	12.5704	NA	NA
Aacs	203.607	-1.92237	0.20548	-9.35548	8.32196e-21	5.46298e-19	77.92	24.8901	295.786	21.9671	78894	NM_030210
Actr3b	38.7683	4.37311	0.394747	11.0783	1.59914e-28	2.31739e-26	56.9586	15.8428	2.56758	1.80794	242894	NM_001004365
Adamts3	14.1231	-2.97771	0.402778	-7.39293	1.43625e-13	3.17441e-12	3.22599	2.01029	23.1935	5.05482	330119	NM_001081401
Adap1	27.3035	-2.297	0.248623	-9.23889	2.49064e-20	1.49448e-18	11.0685	2.86892	50.1082	6.94499	231821	NM_172723
Alb	163.929	-7.56024	0.82735	-9.13791	6.36733e-20	3.60917e-18	1.98939	1.61351	360.995	566.138	11657	NM_009654
Alox5ap	83.4018	-1.12278	0.20428	-5.49626	3.8793e-08	3.23331e-07	39.4654	6.82724	86.103	18.9304	11690	NM_001308462
Antxr2	276.359	-1.29897	0.15199	-8.54645	1.26938e-17	5.24163e-16	121.128	37.2455	302.661	37.8981	71914	NM_133738
Arap2	42.2661	-1.558	0.289108	-5.38901	7.08464e-08	5.56946e-07	15.818	7.28501	45.3212	22.2643	212285	NM_178407
Atp5j2	2491.23	1.09934	0.154701	7.10617	1.19306e-12	2.23496e-11	2476	279.53	1117.06	49.7726	57423	NM_020582
Atp5k	1541.44	1.0747	0.167168	6.42885	1.28575e-10	1.72493e-09	1387.19	180.948	630.522	49.0767	11958	NM_007507
B3galtl	46.1391	-1.3754	0.19615	-7.01199	2.3496e-12	4.15808e-11	24.3917	5.18471	61.5723	7.68845	NA	NA
Camkk2	63.8643	-1.69564	0.197412	-8.58933	8.74759e-18	3.71215e-16	23.8623	10.011	87.2297	10.1765	207565	NM_001199676
Card11	18.7893	-3.0954	0.571927	-5.41223	6.22455e-08	4.96703e-07	2.99219	2.12724	29.6747	23.1846	108723	NM_175362
Cc2d2a	99.5226	-1.13194	0.182487	-6.20285	5.54489e-10	6.55697e-09	51.0026	12.8806	116.417	13.3178	231214	NM_001359903
Ccl24	34.8709	-1.58097	0.324152	-4.87725	1.07573e-06	6.60298e-06	10.762	5.31967	36.5196	6.10777	56221	NM_001356630
Cdk14	98.2892	-1.18227	0.198831	-5.94612	2.74581e-09	2.85181e-08	45.1801	16.861	103.535	5.93167	18647	NM_001310448
Chchd2	2277.05	1.04564	0.131424	7.9562	1.77408e-15	5.39637e-14	2097.65	311.369	978.687	66.7433	14004	NM_024166
Cnpy4	48.8672	-1.00139	0.215929	-4.63758	3.52516e-06	1.93808e-05	25.5053	7.2798	51.7207	9.79867	66455	NM_178612
Col26a1	9.31049	-4.29879	0.642864	-6.68693	2.27894e-11	3.44555e-10	1.49523	0.572059	26.3122	6.33794	140709	NM_001346699
Cpz	8.56615	-6.45283	1.02723	-6.2818	3.34677e-10	4.14929e-09	0.353629	0.485015	27.9855	12.1436	242939	NM_153107
Cxcl9	40.779	-1.66847	0.335284	-4.97629	6.48138e-07	4.18321e-06	11.0631	6.96454	35.1937	7.11079	17329	NM_008599
Cyp51	75.6332	-1.58854	0.194974	-8.14745	3.7169e-16	1.24935e-14	40.9418	11.2307	119.221	18.5959	13121	NM_020010
Dtx1	15.5352	-3.10663	0.580958	-5.34742	8.92178e-08	6.84553e-07	3.14058	1.75115	23.4493	14.7022	14357	NM_008052
Eln	352.792	-1.56164	0.159121	-9.81413	9.7883e-23	7.87215e-21	181.636	39.7184	549.867	101.422	13717	NM_007925
Emilin1	102.476	-1.13071	0.215524	-5.24634	1.55151e-07	1.13924e-06	61.8089	18.0306	142.738	29.5728	100952	NM_133918
Fam114a1	120.311	-1.8079	0.206397	-8.75934	1.96389e-18	8.97838e-17	48.164	23.1832	172.057	37.9273	68303	NM_026667
Fam126a	116.454	-1.02616	0.144962	-7.07883	1.45377e-12	2.67441e-11	60.4667	11.1199	132.216	13.9905	84652	NM_001310471
Fgfbp1	139.277	1.31811	0.184071	7.16087	8.01673e-13	1.55486e-11	144.784	10.297	57.61	9.58934	14181	NM_001271616
Fgl2	278.245	-1.74811	0.17591	-9.93751	2.8588e-23	2.46708e-21	79.9301	24.2641	278.838	43.8959	14190	NM_008013
Fras1	17.9005	-2.81084	0.410293	-6.85081	7.34331e-12	1.20027e-10	4.12124	2.13149	33.3196	12.84	231470	NM_175473
Fscn1	168.842	-1.20413	0.206926	-5.81916	5.91457e-09	5.78686e-08	90.2686	16.6667	236.35	40.2779	14086	NM_007984
Fzd1	88.5089	-1.27765	0.220342	-5.79847	6.69212e-09	6.48565e-08	35.3634	17.5287	87.0067	16.4585	14362	NM_021457
Fzd10	11.5001	-2.58642	0.511375	-5.05776	4.24205e-07	2.83931e-06	3.64442	3.12279	21.472	6.14872	93897	NM_175284
Gbp10	31.6056	2.95808	0.506249	5.84313	5.12288e-09	5.09336e-08	33.8188	19.8624	3.96949	2.50034	626578	NM_001039646
Gbp9	134.101	-1.24528	0.258604	-4.81538	1.46921e-06	8.76449e-06	68.1207	27.1575	158.784	18.4823	236573	NM_172777
Gjc3	24.2398	-1.27381	0.282947	-4.50192	6.73412e-06	3.45847e-05	11.4544	3.83343	28.4992	2.48532	118446	NM_080450
Gpr133	179.218	-1.18383	0.153665	-7.70396	1.31913e-14	3.43443e-13	85.3258	16.4553	189.005	23.4035	NA	NA
Hpd	5.80084	-5.03831	1.12048	-4.49658	6.90564e-06	3.53238e-05	0.375735	0.840168	10.564	14.1432	15445	NM_008277
Hpse	26.5002	-2.00828	0.411561	-4.87967	1.06265e-06	6.54246e-06	7.75162	6.78448	27.5938	6.61659	15442	NM_152803
Hvcn1	70.8403	-2.23922	0.450883	-4.96629	6.82446e-07	4.36976e-06	23.513	8.22788	118.137	74.742	74096	NM_001042489
Insig1	211.59	-1.1722	0.184214	-6.36323	1.9755e-10	2.56514e-09	119.676	24.61	261.963	21.4404	231070	NM_153526
Kcnh2	21.6438	-3.14276	0.454402	-6.91625	4.63758e-12	7.84559e-11	4.40858	1.90634	42.7249	10.4952	16511	NM_001294162
Kcnk3	39.8739	-3.04716	0.406797	-7.49062	6.85467e-14	1.6051e-12	8.32116	5.25833	70.4936	27.3778	16527	NM_010608
Kit	48.2235	-1.39742	0.252822	-5.5273	3.25203e-08	2.7645e-07	17.0073	6.58786	42.5209	10.0449	16590	NM_001122733
Klb	18.3399	-2.25636	0.428353	-5.26754	1.38265e-07	1.02307e-06	5.51187	4.4226	22.823	3.30628	83379	NM_031180
Ldb2	59.5079	-1.25823	0.231632	-5.43204	5.57146e-08	4.49256e-07	24.4081	3.7528	68.9212	14.7378	16826	NM_001077398
Lgi2	24.843	-2.07982	0.294741	-7.05644	1.70817e-12	3.10156e-11	7.79396	2.83555	34.0298	7.40861	246316	NM_001310604
Limk1	43.5329	-1.20339	0.260985	-4.61095	4.00825e-06	2.16646e-05	22.504	9.99172	48.215	9.32329	16885	NM_001305875
Lrrc17	39.0659	-3.89508	0.415418	-9.37627	6.83466e-21	4.5449e-19	3.75029	3.20596	78.6993	14.7446	74511	NM_028977
Myl2	2080.33	1.46248	0.27724	5.27513	1.32663e-07	9.8256e-07	2144.95	459.369	765.042	112.698	17906	NM_001384326
N4bp2	38.6075	-1.69904	0.285307	-5.95513	2.59857e-09	2.71912e-08	16.4988	6.17201	52.3575	17.0379	333789	NM_001024917
Nat8l	95.3416	-2.53873	0.318989	-7.95868	1.73887e-15	5.30786e-14	31.1623	17.66	164.907	34.3638	269642	NM_001001985
Ncf1	65.92	-1.93565	0.291051	-6.65055	2.92003e-11	4.33377e-10	21.2575	11.8962	80.6911	31.9641	17969	NM_001286037
Nos1	473.338	1.07778	0.178699	6.03125	1.627e-09	1.76875e-08	372.376	60.0382	179.613	50.874	18125	NM_008712
Oasl1	9.58925	-2.21529	0.501489	-4.41742	9.98848e-06	4.93354e-05	3.58877	1.56426	14.3852	3.64728	231655	NM_001359945
Oasl2	77.1983	-1.45771	0.323268	-4.50931	6.50392e-06	3.35934e-05	36.1159	15.4709	95.7815	13.7674	23962	NM_001359181
P2rx7	50.6296	-1.16268	0.25096	-4.63293	3.60531e-06	1.97578e-05	21.5348	5.5016	51.4071	6.88552	18439	NM_001038839
Pcdh7	90.4612	-1.36058	0.203914	-6.67231	2.51814e-11	3.7701e-10	35.1627	13.6235	96.3052	4.58218	54216	NM_001122758
Pcolce	545.074	-1.71448	0.146489	-11.7038	1.21881e-31	2.34027e-29	199.783	35.904	682.231	95.8707	18542	NM_008788
Pdgfra	618.443	-1.24895	0.138699	-9.00477	2.16118e-19	1.13692e-17	239.612	42.658	580.779	60.901	18595	NM_001083316
Pgm1	37.8101	-1.14548	0.250168	-4.57884	4.67561e-06	2.49625e-05	18.1884	9.74137	41.4904	7.35817	72157	NM_028132
Pptc7	1705.52	1.00869	0.0782413	12.892	4.99158e-38	1.50344e-35	1449.89	72.3602	719.997	91.0793	320717	NM_177242
Ptpn13	85.2873	-1.17123	0.209874	-5.58061	2.39673e-08	2.0966e-07	34.259	3.71171	85.0826	8.60295	19249	NM_011204
Rilpl1	1894.82	1.24487	0.131189	9.48914	2.32948e-21	1.64143e-19	1689.64	178.489	704.046	163.183	75695	NM_021430
Scarb1	359.652	-1.18389	0.143571	-8.24603	1.63739e-16	5.74244e-15	187.505	25.7648	453.992	36.8927	20778	NM_001205082
Sel1l3	424.519	-1.11417	0.142928	-7.79535	6.42315e-15	1.77457e-13	244.131	25.5464	529.518	71.9248	231238	NM_172710
Selplg	63.1772	-2.36893	0.334935	-7.07282	1.51811e-12	2.78387e-11	18.5351	5.67529	94.4214	54.2161	20345	NM_009151
Sema3a	25.464	-3.43362	0.437626	-7.846	4.29523e-15	1.22638e-13	4.68518	4.76546	45.4529	12.6173	20346	NM_001243072
Sema3d	35.5205	-2.64938	0.301043	-8.80066	1.36017e-18	6.38949e-17	8.09542	6.66484	46.5706	8.26151	108151	NM_028882
Sh2b2	56.9155	-1.37627	0.209918	-6.55625	5.51783e-11	7.89193e-10	26.033	6.85158	69.2897	17.191	23921	NM_001302938
Shh	2.30101	5.26793	1.16578	4.5188	6.21901e-06	3.21976e-05	3.60773	2.3112	0	0	20423	NM_009170
Sorcs2	51.2028	-1.72527	0.258027	-6.68641	2.28719e-11	3.45185e-10	19.7573	9.86501	70.5831	9.90594	81840	NM_030889
Spon2	22.2694	-2.18035	0.442692	-4.9252	8.42756e-07	5.30122e-06	7.91867	2.48949	37.814	12.1452	100689	NM_133903
Spp1	121.542	-1.43657	0.302869	-4.74319	2.10377e-06	1.22039e-05	73.0421	17.867	195.503	115.734	20750	NM_001204201
Srd5a3	40.6945	-1.67014	0.234909	-7.1097	1.16294e-12	2.18652e-11	12.3214	3.95316	47.1595	7.81048	57357	NM_020611
Steap4	586.674	-1.07943	0.129017	-8.36659	5.93121e-17	2.23856e-15	283.976	63.0418	599.854	89.6839	117167	NM_054098
Tbc1d1	1050.61	1.558	0.156141	9.97814	1.89991e-23	1.68697e-21	1025.11	156.178	349.19	75.3104	57915	NM_001289514
Tmem119	36.0116	-2.69466	0.437628	-6.15742	7.39409e-10	8.54632e-09	11.7903	4.80602	70.4212	17.7697	231633	NM_146162
Tmem132b	44.5211	5.79685	0.476829	12.1571	5.26035e-34	1.1883e-31	58.6336	16.4409	1.0471	0.630909	208151	NM_001190352
Tmem60	115.818	1.07237	0.153174	7.00099	2.54154e-12	4.472e-11	136.184	18.8559	61.6352	13.2326	212090	NM_177601
Tomm7	481.05	1.27808	0.157121	8.13434	4.14194e-16	1.38918e-14	477.495	61.6469	187.553	12.5168	66169	NM_025394
Ttyh3	123.284	-1.53911	0.182768	-8.42112	3.72887e-17	1.4501e-15	54.0721	11.4302	167.735	24.9884	78339	NM_001308039
Ubc	2427.42	2.02681	0.162745	12.4539	1.3314e-35	3.46637e-33	1068.06	231.567	256.88	46.913	22190	NM_019639
Uchl1	44.0511	1.14313	0.204375	5.5933	2.22797e-08	1.96125e-07	44.8048	7.65059	20.5152	1.22273	22223	NM_011670
Ugdh	144.528	-1.08964	0.170132	-6.40465	1.50713e-10	2.00269e-09	67.3209	21.2516	141.754	13.1093	22235	NM_009466
Wbscr17	61.6525	-1.16712	0.179597	-6.49853	8.11072e-11	1.13366e-09	35.0235	5.64194	77.6029	16.3426	NA	NA
1110001J03Rik	331.033	1.18642	0.163958	7.2361	4.61754e-13	9.30841e-12	380.404	76.985	161.16	20.3003	NA	NA
2210408F21Rik	234.466	1.054	0.155111	6.79513	1.08212e-11	1.73331e-10	251.745	45.9576	114.075	9.63062	73652	NR_040257
2310001H17Rik	141.455	1.00593	0.173336	5.80334	6.50067e-09	6.32406e-08	166.026	29.3622	78.8369	8.18336	76432	NR_040265
8430408G22Rik	305.091	2.79907	0.300267	9.32195	1.14224e-20	7.22052e-19	285.588	89.547	41.4736	13.8197	NA	NA
Acn9	61.6086	1.11393	0.192358	5.79094	6.99923e-09	6.75771e-08	68.0052	6.33772	29.6871	5.35973	NA	NA
Akr1b8	30.5159	-1.24871	0.246139	-5.07319	3.91198e-07	2.64141e-06	14.0568	2.94967	33.095	5.62956	14187	NM_008012
Alox5	23.7305	-1.77084	0.327848	-5.4014	6.61233e-08	5.25735e-07	7.26763	3.76536	25.6419	5.25177	11689	NM_009662
Antxr1	268.154	-1.85182	0.171297	-10.8105	3.06864e-27	3.8323e-25	97.9155	12.3137	362.543	19.3344	69538	NM_054041
Arhgap25	27.463	-2.00195	0.347181	-5.76629	8.10341e-09	7.73146e-08	10.7893	3.0968	40.3908	23.9206	232201	NM_001037727
Arhgdib	196.311	-1.60225	0.245473	-6.52722	6.7002e-11	9.50339e-10	77.6343	29.9881	237.978	116.474	11857	NM_001301301
Asb15	1088.26	1.06819	0.169192	6.31344	2.72897e-10	3.43532e-09	912.312	93.4441	428.897	105.164	78910	NM_080847
Asb4	167.311	1.8128	0.170466	10.6344	2.06187e-26	2.39943e-24	191.293	24.6547	51.5764	12.5971	65255	NM_001355662
Asprv1	6.09673	-3.38085	0.764949	-4.4197	9.88374e-06	4.88967e-05	0.944149	0.669305	10.8581	5.73476	67855	NM_026414
Bola3	579.992	1.13535	0.171749	6.61054	3.8293e-11	5.59143e-10	597.827	26.0577	262.138	25.8616	78653	NM_001363772
C1ra	263.139	-1.07787	0.160322	-6.72315	1.77835e-11	2.74821e-10	109.529	31.4865	230.353	20.4697	50909	NM_023143
C1rl	13.9003	-2.3713	0.399483	-5.93593	2.9218e-09	3.02846e-08	4.37944	1.9263	20.6644	2.37995	232371	NM_181344
C3ar1	56.9559	-1.77578	0.292425	-6.0726	1.25853e-09	1.39482e-08	18.6419	11.2818	67.4669	16.3898	12267	NM_009779
Cacna2d4	7.45409	-3.304	0.638722	-5.17284	2.30568e-07	1.62466e-06	1.08931	1.20091	12.9448	2.52454	319734	NM_001033382
Ccnd2	391.356	-1.40709	0.185595	-7.5815	3.41587e-14	8.47676e-13	181.641	61.4864	461.525	40.0924	12444	NM_009829
Chl1	19.2142	-1.67715	0.339414	-4.9413	7.76046e-07	4.91379e-06	6.67327	4.90174	19.5504	3.62214	12661	NM_007697
Clec12a	21.2598	-2.29025	0.419961	-5.45349	4.93919e-08	4.02284e-07	6.32215	1.83273	32.3459	11.6009	232413	NM_177686
Clec4a1	34.8768	-1.65767	0.316463	-5.23813	1.62211e-07	1.18372e-06	10.297	6.60626	41.2286	10.519	269799	NM_199311
Clec4a3	22.6327	-2.26684	0.398672	-5.68597	1.30071e-08	1.19714e-07	5.38468	5.01812	26.8272	12.6201	73149	NM_001204241
Clec7a	24.7404	-2.29603	0.406989	-5.64149	1.6858e-08	1.51544e-07	6.58964	5.20855	30.7842	12.1562	56644	NM_001309637
Col1a2	3394.62	-3.34744	0.186589	-17.9401	5.73101e-72	9.78156e-69	775.059	255.205	8077.5	1852.88	12843	NM_007743
Col28a1	25.7886	-1.5001	0.289817	-5.17603	2.26657e-07	1.60224e-06	12.2458	2.38863	40.5139	12.5853	213945	NM_001037865
Eif2ak3	77.5019	-1.01123	0.184532	-5.47994	4.25473e-08	3.5157e-07	40.3615	12.5615	82.8006	17.4684	13666	NM_001313918
Emp1	551.156	-1.46885	0.149135	-9.84916	6.91225e-23	5.70855e-21	214.519	61.077	607.247	94.2556	13730	NM_001288627
Fam115a	77.9636	-1.44997	0.268352	-5.40325	6.54458e-08	5.20618e-07	35.0963	16.8219	93.197	13.9941	NA	NA
Fkbp14	81.0986	-1.14358	0.16305	-7.01364	2.32197e-12	4.11393e-11	43.3845	5.63059	97.8825	21.5301	231997	NM_001363792
Frmd4b	142.236	-1.24045	0.172103	-7.20758	5.69567e-13	1.13038e-11	64.8244	17.0472	156.964	12.4655	232288	NM_001346637
Gabarapl1	769.175	1.12374	0.10638	10.5634	4.4042e-26	4.90239e-24	646.702	26.3665	302.514	28.7013	57436	NM_020590
Gadd45a	445.106	1.94661	0.223386	8.71409	2.93099e-18	1.31262e-16	477.8	178.46	134.174	10.6995	13197	NM_007836
Gkn3	11.2987	-2.46481	0.505267	-4.87824	1.07039e-06	6.5769e-06	2.84181	2.0904	20.6852	6.36594	68888	NM_026860
Il17ra	60.7564	-1.49267	0.278526	-5.35918	8.35985e-08	6.44334e-07	26.2416	14.9597	74.6911	30.8007	16172	NM_008359
Il17rc	48.7771	-1.01452	0.18472	-5.4922	3.96949e-08	3.30132e-07	25.7819	6.13406	49.529	4.78891	171095	NM_134159
Inmt	587.597	1.21459	0.195085	6.22593	4.78695e-10	5.74471e-09	403.374	75.0129	172.454	64.9745	21743	NM_009349
Irf5	54.7349	-1.86935	0.265835	-7.03199	2.03607e-12	3.66231e-11	20.6444	8.50242	78.6038	14.4787	27056	NM_001252382
Kcna1	138.589	1.02244	0.20688	4.94216	7.72605e-07	4.89603e-06	122.21	38.3611	59.4891	17.3513	16485	NM_010595
Klf15	703.897	1.18865	0.138387	8.58933	8.74813e-18	3.71215e-16	616.769	49.0719	270.003	51.7916	66277	NM_001355668
Leprel2	77.2129	-1.73071	0.218791	-7.91033	2.56717e-15	7.62753e-14	28.7379	13.4071	98.169	15.752	NA	NA
Lmod2	1654.43	1.21337	0.138389	8.76777	1.82232e-18	8.40622e-17	1612.79	252.019	705.196	110.838	93677	NM_053098
Lmod3	851.952	-1.0063	0.114809	-8.765	1.8678e-18	8.58933e-17	526.15	46.31	1088.62	76.3591	320502	NM_001081157
Loxl3	49.2144	-1.26235	0.207676	-6.07846	1.21345e-09	1.34973e-08	23.6817	7.54538	54.3608	7.61101	16950	NM_013586
Lrmp	24.6156	-3.20782	0.439084	-7.30571	2.75812e-13	5.78791e-12	3.66643	2.06195	40.6659	20.4642	16970	NM_001281980
Lrtm2	12.3149	-2.23784	0.416694	-5.37047	7.85323e-08	6.09876e-07	4.49906	3.38276	23.5199	5.71524	211187	NM_001172207
Malsu1	295.495	1.17117	0.157837	7.42015	1.16986e-13	2.63868e-12	312.84	33.9082	136.444	12.022	75593	NM_029353
Mest	50.083	-2.51864	0.329272	-7.64912	2.02366e-14	5.16369e-13	16.1522	5.45979	90.1575	29.2713	17294	NM_001252292
Mfap5	333.177	-1.12582	0.119922	-9.38796	6.11764e-21	4.12163e-19	158.997	25.3009	348.398	52.9971	50530	NM_001347434
Mmrn1	106.498	-2.51707	0.308024	-8.17166	3.04186e-16	1.03836e-14	13.2256	9.09483	83.6719	30.5413	70945	NM_001163507
Mob1a	121.511	-1.08615	0.214384	-5.06635	4.05519e-07	2.7309e-06	55.2432	18.1665	124.55	45.2383	232157	NM_145571
Ndnf	4.87064	-3.35038	0.732918	-4.57129	4.84726e-06	2.57643e-05	1.09581	0.341623	9.11947	2.03317	68169	NM_172399
Ndufa4	3486.41	1.00863	0.149347	6.75357	1.44256e-11	2.26807e-10	3266.91	361.79	1560.34	50.6365	17992	NM_010886
Ndufb2	893.365	1.14306	0.183195	6.23959	4.38721e-10	5.29394e-09	935.416	120.258	410.673	61.1794	68198	NM_001358797
Oxtr	32.3678	-3.96819	0.744251	-5.3318	9.72465e-08	7.42078e-07	2.87196	1.58908	43.4787	19.453	18430	NM_001081147
Pdk4	12752.4	5.51277	0.186436	29.5692	3.72289e-192	5.71873e-188	12881.3	1917.4	278.033	106.785	27273	NM_013743
Plxna1	378.572	-1.30326	0.129852	-10.0365	1.05345e-23	9.63215e-22	189.695	22.6771	483.07	50.8665	18844	NM_008881
Prokr1	13.3697	-2.12595	0.42663	-4.98312	6.25676e-07	4.04845e-06	4.64692	1.15414	18.7567	4.84031	58182	NM_001355655
Ptn	26.6122	-2.14199	0.458564	-4.67108	2.99618e-06	1.6834e-05	10.2746	11.9507	39.7836	9.66115	19242	NM_008973
Ptpn6	74.1855	-2.53573	0.490467	-5.17004	2.34048e-07	1.64691e-06	19.0871	7.25454	122.374	84.8048	15170	NM_001077705
Rab43	157.288	-1.02504	0.153461	-6.67951	2.39745e-11	3.60344e-10	82.1313	17.2976	173.642	22.1154	69834	NM_001039394
Rassf4	139.012	-1.29137	0.165211	-7.81651	5.43099e-15	1.51959e-13	57.409	10.3098	152.9	22.3754	213391	NM_178045
Ret	65.4289	-2.31679	0.288681	-8.02543	1.01172e-15	3.19775e-14	25.4293	14.7235	116.775	22.1477	19713	NM_001080780
Samd9l	197.773	-1.22125	0.1968	-6.20557	5.45006e-10	6.45975e-09	102.127	28.1273	240.144	85.27	209086	NM_010156
Scrn1	21.066	-2.7754	0.367332	-7.55557	4.17032e-14	1.02333e-12	3.70883	0.712887	27.4264	4.82325	69938	NM_027268
Smo	103.694	-1.65769	0.23588	-7.02768	2.09998e-12	3.75966e-11	35.5901	16.6728	124.168	14.0976	319757	NM_176996
Srgap3	25.5208	-1.70785	0.379759	-4.4972	6.88553e-06	3.52327e-05	7.94048	3.4403	26.2753	3.55365	259302	NM_080448
Tapbpl	54.1591	-1.64968	0.255442	-6.45812	1.0601e-10	1.44235e-09	18.4641	2.29827	60.1665	14.21	213233	NM_145391
Timp4	547.362	1.64041	0.15288	10.7301	7.35439e-27	9.03766e-25	443.564	42.7644	144.756	43.8453	110595	NM_001356406
Tmem140	75.3806	1.47461	0.22195	6.64386	3.05573e-11	4.52207e-10	56.7065	10.7602	19.8926	4.78679	68487	NM_001368365
Tspan11	19.7467	-1.86598	0.288029	-6.47844	9.26738e-11	1.28365e-09	6.5364	1.82489	31.4509	5.36925	68498	NM_026743
Vamp5	521.418	1.01888	0.187259	5.44099	5.29848e-08	4.29046e-07	537.752	97.3459	259.705	15.3042	53620	NM_001080742
Wnt2	6.91125	-3.5525	0.635035	-5.59418	2.21666e-08	1.95241e-07	0.715264	0.7766	13.5901	2.67285	22413	NM_023653
2310057M21Rik	159.68	1.33703	0.143937	9.289	1.55739e-20	9.56925e-19	162.264	30.7999	63.4402	11.3292	68277	NM_026655
9430038I01Rik	31.3185	1.27487	0.256657	4.9672	6.7925e-07	4.35111e-06	36.5664	8.51434	15.3234	4.36999	77252	NM_029886
Abhd2	63.052	-1.22255	0.23716	-5.15495	2.53697e-07	1.76978e-06	23.1649	6.73416	60.9747	10.0327	54608	NM_018811
Adam12	29.0591	-2.49879	0.498506	-5.01256	5.37115e-07	3.51989e-06	7.48798	9.17842	42.9198	11.0346	11489	NM_007400
Adamtsl3	88.8659	-1.14566	0.160528	-7.13681	9.55247e-13	1.83649e-11	42.7467	6.12094	102.793	9.21587	269959	NM_001190374
Aldh1a3	52.5908	-1.89819	0.279378	-6.79433	1.08816e-11	1.74117e-10	16.8108	7.93494	67.7426	5.42367	56847	NM_053080
Ano1	85.7609	-1.15717	0.255684	-4.52576	6.01792e-06	3.12513e-05	38.3433	18.7002	90.9436	13.8778	101772	NM_001242349
Anpep	223.488	-1.4151	0.232815	-6.07822	1.21526e-09	1.35077e-08	82.4673	21.0897	223.774	12.8313	16790	NM_008486
Apobr	22.6072	-1.90063	0.369371	-5.1456	2.66669e-07	1.84768e-06	7.24013	5.44835	27.7929	6.87613	171504	NM_138310
Apoc1	29.1054	-3.0953	0.335258	-9.23261	2.64112e-20	1.57861e-18	5.54598	3.27456	44.388	13.0658	11812	NM_001110009
Arntl	116.411	1.19645	0.25053	4.7757	1.79081e-06	1.05035e-05	98.0068	23.3252	41.3624	10.3014	11865	NM_001243048
Athl1	57.1426	-1.06372	0.235224	-4.52216	6.1211e-06	3.17442e-05	31.3526	12.1066	62.5462	10.6863	NA	NA
Atp10a	41.2748	-2.10765	0.331697	-6.35413	2.09605e-10	2.70099e-09	14.1816	8.47987	56.5042	6.87087	11982	NM_009728
Atp1a3	25.4838	-2.61436	0.413416	-6.3238	2.55204e-10	3.2425e-09	5.66259	4.67714	37.5354	9.136	232975	NM_001290469
Axl	903.46	-1.01057	0.0945904	-10.6836	1.21406e-26	1.45697e-24	407.475	44.0197	820.925	44.0552	26362	NM_001190974
BC048679	71.3661	2.32058	0.246009	9.43289	3.98958e-21	2.74816e-19	104.041	14.4651	19.6123	3.8628	210321	NM_001193274
Capn5	56.3582	-2.2714	0.287877	-7.89018	3.01754e-15	8.86946e-14	15.6657	9.71991	73.0897	14.6049	12337	NM_001301250
Ccdc8	18.9002	-2.28882	0.392993	-5.82408	5.74294e-09	5.6441e-08	6.28271	3.12611	30.9394	4.29815	434130	NM_001101535
Ccnd1	162.466	-1.34946	0.205043	-6.58139	4.66074e-11	6.73505e-10	66.8683	20.4544	180.462	54.2638	12443	NM_001379248
Cd33	15.8396	-2.72851	0.439488	-6.2084	5.3527e-10	6.37984e-09	2.51033	2.13677	17.3904	4.88944	12489	NM_001111058
Cd37	46.7655	-1.78273	0.395063	-4.51252	6.40634e-06	3.31228e-05	19.5067	9.02517	66.0002	46.0304	12493	NM_001290802
Cdc42ep5	19.0175	-1.746	0.373699	-4.67221	2.97982e-06	1.6762e-05	6.37625	4.16928	25.4237	6.7632	58804	NM_021454
Cdkn1c	246.216	-1.05221	0.168497	-6.2447	4.24612e-10	5.1358e-09	125.603	25.0044	274.805	36.6311	12577	NM_001161624
Cdr2	49.663	-1.38906	0.230233	-6.0333	1.60647e-09	1.7489e-08	22.9467	12.2063	60.6579	10.9761	12585	NM_001354986
Chp2	47.1795	-1.54309	0.269244	-5.7312	9.97249e-09	9.3521e-08	16.8265	7.01757	50.3176	8.43886	70261	NM_027363
Clec11a	25.4711	-3.2445	0.331088	-9.79953	1.13113e-22	8.9563e-21	5.16608	3.01115	50.1883	11.7482	20256	NM_009131
Coa4	46.7446	1.00939	0.205209	4.91886	8.70478e-07	5.45772e-06	51.456	8.09385	25.7182	5.35674	68185	NM_183270
Cox6a2	6128.33	1.15694	0.164946	7.01405	2.31516e-12	4.1066e-11	5997.02	660.136	2589.74	331.393	12862	NM_009943
Cox8b	2418.79	1.3262	0.163628	8.10499	5.27503e-16	1.72771e-14	2551.16	324.01	972.711	54.6982	12869	NM_007751
Cpeb1	286.764	1.07242	0.156854	6.83707	8.08312e-12	1.31391e-10	238.451	36.7569	114.544	17.9278	12877	NM_001252525
Cpxm2	183.572	-1.44395	0.155391	-9.29234	1.50939e-20	9.3491e-19	67.6257	11.8325	184.922	21.6392	55987	NM_018867
Cyb5r2	32.4192	1.42892	0.298033	4.7945	1.63078e-06	9.61795e-06	26.3279	8.02964	10.1785	4.48701	320635	NM_001205227
Cyp2f2	184.959	1.72907	0.268614	6.43699	1.21863e-10	1.64061e-09	111.612	69.5847	32.1221	11.0911	13107	NM_007817
D7Ertd715e	24.465	1.50058	0.284896	5.26712	1.38582e-07	1.02492e-06	30.9453	3.69083	10.0571	2.88142	NA	NA
Dchs1	98.8846	-1.69281	0.219123	-7.72537	1.11532e-14	2.92862e-13	43.4821	14.1464	146.216	28.1088	233651	NM_001162943
Dgat2	1113.97	-1.66697	0.24104	-6.91572	4.65495e-12	7.8663e-11	466.79	131.964	1543.19	392.796	67800	NM_026384
Dhcr7	59.8422	-1.39311	0.229026	-6.08275	1.18137e-09	1.31595e-08	30.6087	13.7035	79.3957	9.84168	13360	NM_001382498
Dkk3	223.256	1.93714	0.225335	8.59668	8.20539e-18	3.51212e-16	183.291	54.2197	47.9028	14.7351	50781	NM_001360257
Dmkn	21.6672	-3.4101	0.604797	-5.63842	1.71613e-08	1.53891e-07	3.35351	3.55626	29.7683	14.8295	73712	NM_001166173
Dpy19l3	49.8885	-1.17195	0.206179	-5.68413	1.31483e-08	1.20898e-07	26.1554	5.76512	59.2534	12.8368	233115	NM_178704
E2f8	3.12266	-4.62879	1.01533	-4.55889	5.14248e-06	2.71549e-05	0.168991	0.377876	5.7579	2.82787	108961	NM_001013368
Emp3	133.886	-1.30747	0.18311	-7.14036	9.30846e-13	1.79182e-11	59.8312	11.9191	154.944	27.5836	13732	NM_001146346
Fchsd2	78.8903	-1.0313	0.225566	-4.57203	4.83011e-06	2.57087e-05	44.2149	16.6688	94.4844	31.119	207278	NM_001146010
Folr2	152.291	-2.26468	0.257206	-8.80494	1.3092e-18	6.16888e-17	33.9477	17.8738	184.573	33.6758	14276	NM_001303231
Fosb	6.79074	-3.32427	0.690228	-4.81619	1.46323e-06	8.73221e-06	1.49678	0.575598	11.8647	8.45061	14282	NM_001347586
Glrx3	180.44	1.40811	0.227266	6.19586	5.79682e-10	6.81293e-09	161.31	39.9392	58.2686	9.85377	30926	NM_001348093
H19	8263.61	-1.1007	0.119459	-9.21398	3.14244e-20	1.87097e-18	5434.52	958.063	11738.3	1690.68	14955	NR_001592
Hpx	6.56009	-5.72644	1.21453	-4.71493	2.41799e-06	1.38437e-05	0.170538	0.381334	12.1754	17.0412	15458	NM_017371
Htatip2	80.6057	1.0711	0.215383	4.97301	6.59215e-07	4.23513e-06	88.6592	20.1329	41.1216	9.9442	53415	NM_001146049
Ifitm6	8.65632	-3.31727	0.650546	-5.0992	3.41086e-07	2.32656e-06	1.07653	1.63536	14.6073	7.10687	213002	NM_001033632
Igf2	342.616	-1.09056	0.124287	-8.77455	1.71582e-18	7.9869e-17	201.23	24.6059	425.732	21.9011	16002	NM_001122736
Il16	108.151	-1.13486	0.24161	-4.69708	2.63902e-06	1.5014e-05	59.389	20.7594	136.278	50.6968	16170	NM_001360087
Iqgap1	664.605	-1.07941	0.140837	-7.66425	1.79879e-14	4.6052e-13	321.991	51.9631	697.453	121.317	29875	NM_016721
Irf7	104.595	-1.62739	0.303472	-5.36256	8.2051e-08	6.33997e-07	42.311	16.4006	133.053	51.4455	54123	NM_001252600
Itgam	93.8252	-2.18384	0.314452	-6.94493	3.78655e-12	6.47719e-11	27.4331	20.2328	115.341	36.9535	16409	NM_001082960
Kcnk6	35.4884	-2.01421	0.268101	-7.51289	5.78343e-14	1.37949e-12	12.5752	6.36079	47.019	5.67442	52150	NM_001033525
Lgals4	15.3139	2.30086	0.384767	5.97988	2.23303e-09	2.37217e-08	15.9639	3.12334	3.24537	1.32466	16855	NM_010706
Lgals7	11.5766	-3.13048	0.698188	-4.48372	7.33521e-06	3.7273e-05	2.33998	2.47016	22.3145	7.39269	16858	NM_008496
Lrrc32	114.32	-1.06378	0.171464	-6.20408	5.50166e-10	6.51588e-09	65.8885	16.3695	145.911	17.4522	434215	NM_001113379
Lrrk1	130.276	-1.11558	0.166556	-6.69794	2.11379e-11	3.20849e-10	63.8254	8.37216	146.693	15.0118	233328	NM_146191
Lsp1	413.842	-1.12591	0.14468	-7.78206	7.13507e-15	1.96419e-13	246.139	16.1001	525.083	112.203	16985	NM_001136071
Map6	63.986	-1.02298	0.18953	-5.39747	6.75886e-08	5.35172e-07	29.9882	7.25679	67.819	9.66075	17760	NM_001043355
Mki67	59.289	-1.94868	0.382373	-5.09629	3.46373e-07	2.36053e-06	22.2459	9.5771	88.556	43.2219	17345	NM_001081117
Mrgprf	30.0989	-1.83211	0.287254	-6.378	1.79411e-10	2.35222e-09	12.9603	5.11875	47.6667	6.63547	211577	NM_145379
Mrpl23	259.057	1.06092	0.167126	6.348	2.18127e-10	2.7922e-09	179.877	23.5338	83.5719	13.0195	19935	NM_011288
Myh14	429.234	1.09411	0.117224	9.33355	1.02379e-20	6.55547e-19	404.335	85.798	196.269	21.6537	71960	NM_001271538
Ndn	92.4859	-1.37724	0.184717	-7.45593	8.9233e-14	2.05504e-12	49.0129	7.39732	124.565	21.9455	17984	NM_010882
Ndufa3	1460.14	1.6742	0.16235	10.3123	6.20261e-25	6.14699e-23	1611.72	210.653	478.044	27.2742	66091	NM_025348
Nucb2	66.5806	-1.48037	0.188245	-7.86405	3.71912e-15	1.07781e-13	29.4154	7.54474	83.9846	9.8471	53322	NM_001130479
Olfml1	56.0066	-2.09492	0.215032	-9.74235	1.98904e-22	1.54312e-20	18.9477	8.42521	78.5648	17.0955	244198	NM_172907
Otog	7.17349	3.0481	0.650475	4.68596	2.78652e-06	1.57831e-05	8.43178	3.38476	0.871301	0.825208	18419	NM_013624
Pdcd5	583.565	1.25738	0.182296	6.89746	5.29414e-12	8.81075e-11	574.868	42.9906	228.854	13.3628	56330	NM_019746
Plekhb1	900.682	1.36022	0.1212	11.2229	3.14659e-29	4.98296e-27	932.758	97.5601	348.042	21.9718	27276	NM_001163182
Pnmal2	9.59121	-4.12271	0.655387	-6.29051	3.16434e-10	3.93583e-09	0.906397	1.03964	20.2947	6.21051	434128	NM_001099636
Polr2l	231.564	1.00173	0.152333	6.57597	4.83364e-11	6.95221e-10	208.113	34.2562	98.1602	7.64749	66491	NM_025593
Ppfibp2	138.837	1.11683	0.162069	6.89105	5.53807e-12	9.20674e-11	138.49	24.2512	62.7123	11.0079	19024	NM_001163557
Ppp1r13l	55.6955	1.14699	0.222051	5.16541	2.39912e-07	1.68432e-06	44.7933	4.36095	22.9211	6.7506	333654	NM_001010836
Prkcb	81.7424	-2.13678	0.431711	-4.94956	7.438e-07	4.73498e-06	21.0561	10.5357	91.4007	69.1484	18751	NM_001316672
Ptpre	43.9918	-1.68645	0.26068	-6.46941	9.83847e-11	1.35541e-09	15.5984	8.1167	53.5652	8.85476	19267	NM_001316678
Rcn3	222.642	-1.7772	0.15988	-11.1159	1.0501e-28	1.56607e-26	92.525	21.6465	320.964	38.0836	52377	NM_001355045
Rgma	343.817	-1.25052	0.136139	-9.18561	4.09192e-20	2.36301e-18	188.965	20.8053	467.332	48.6709	244058	NM_177740
Rgs10	44.5105	-1.60662	0.293902	-5.46651	4.58994e-08	3.76032e-07	18.5866	8.017	60.7719	12.0978	67865	NM_026418
Rhpn2	77.4628	1.98645	0.247829	8.01543	1.09753e-15	3.45475e-14	83.9662	13.4245	19.9539	6.84859	52428	NM_027897
Ric3	49.0642	1.13718	0.227034	5.00886	5.47547e-07	3.58062e-06	34.4976	7.89418	16.4336	5.24146	320360	NM_001038624
Rinl	19.6155	-2.1818	0.453519	-4.81082	1.50314e-06	8.94604e-06	6.61667	4.20145	27.7765	20.5685	320435	NM_001358916
Rplp2	1919.09	1.17953	0.161667	7.29606	2.96308e-13	6.18422e-12	1739.23	279.562	744.31	78.3963	67186	NM_001360657
Rps13	1591.51	1.12049	0.149545	7.49268	6.7482e-14	1.585e-12	1463.16	157.403	639.635	89.8928	68052	NM_026533
Sbk1	220.766	-1.26967	0.167555	-7.57762	3.5194e-14	8.71959e-13	122.151	32.384	325.078	27.1989	104175	NM_001360811
Sbsn	36.1989	-1.48234	0.277304	-5.34555	9.01423e-08	6.91301e-07	13.0266	4.33519	37.2398	8.15933	282619	NM_001083903
Scube2	14.7404	-2.284	0.413638	-5.52173	3.35682e-08	2.84119e-07	4.7935	1.16647	22.9613	7.81365	56788	NM_020052
Sepw1	6089.66	1.17134	0.156526	7.48337	7.24416e-14	1.68602e-12	6258.04	688.02	2631.41	210.422	NA	NA
Serpinh1	1122.69	-1.83608	0.133373	-13.7665	4.05499e-43	1.83202e-40	457.258	65.2613	1672.55	210.782	12406	NM_001111043
Ssc5d	137.933	-2.38513	0.19748	-12.0778	1.38347e-33	3.07993e-31	46.2127	13.2803	249.452	33.6128	269855	NM_173008
Syt3	30.4902	1.18992	0.25839	4.60511	4.12242e-06	2.22269e-05	28.6704	7.91654	13.1009	1.65405	20981	NM_001114116
Syt9	14.395	2.22659	0.366059	6.08259	1.18254e-09	1.31631e-08	15.1761	3.14549	3.42076	2.13266	60510	NM_021889
Sytl2	44.5482	-1.51527	0.238171	-6.3621	1.99016e-10	2.57982e-09	22.4828	6.42463	62.4499	20.0019	83671	NM_001040085
Tacc2	9058.52	1.75441	0.110007	15.9482	2.93393e-57	3.21915e-54	8058.96	524.338	2369.23	443.291	57752	NM_001004468
Thrsp	928.738	-1.94655	0.330088	-5.89707	3.70013e-09	3.77013e-08	378.067	198.248	1426.75	183.606	21835	NM_009381
Tm6sf1	63.709	-1.29587	0.197141	-6.57331	4.92085e-11	7.07102e-10	31.208	11.7164	79.0157	11.8834	107769	NM_001291282
Tmem126a	492.751	1.00029	0.124272	8.04919	8.33445e-16	2.65613e-14	515.108	48.2991	247.237	13.0078	66271	NM_025460
Tmem147	875.222	1.05364	0.144327	7.30035	2.87014e-13	6.01476e-12	935.384	151.58	427.574	32.1695	69804	NM_027215
Tmem160	199.562	1.27548	0.179486	7.1063	1.19196e-12	2.23496e-11	208.364	42.6806	84.6987	7.19174	69094	NM_026938
Trim21	40.1886	-1.39465	0.277576	-5.0244	5.05015e-07	3.32941e-06	16.9194	4.87042	46.5739	2.89164	20821	NM_001082552
Trim30a	84.5718	-1.1719	0.230599	-5.08197	3.73541e-07	2.52996e-06	44.4668	15.3613	98.2997	33.8219	20128	NM_001357467
Tsku	26.4153	-1.76093	0.369004	-4.77212	1.82301e-06	1.06883e-05	12.4706	8.94394	40.282	4.78915	244152	NM_001024619
Tyrobp	81.033	-1.66166	0.232936	-7.13355	9.78142e-13	1.87816e-11	31.0236	10.4308	98.6776	28.5475	22177	NM_011662
Ucp3	2792.06	3.83672	0.151985	25.2441	1.31478e-140	6.7321e-137	2777.24	308.185	191.995	61.0477	22229	NM_009464
Ush1c	11.3286	2.19803	0.379697	5.7889	7.08488e-09	6.82753e-08	14.5086	2.688	3.15679	0.936408	72088	NM_001163733
Adcy7	109.141	-1.96329	0.259793	-7.55712	4.12093e-14	1.01283e-12	43.2964	17.9422	166.441	43.1257	11513	NM_001037723
Angpt2	46.8233	-1.07776	0.238428	-4.52026	6.17651e-06	3.19991e-05	23.1652	8.40346	49.1662	12.5526	11601	NM_007426
Arrdc2	1475.29	3.22625	0.309193	10.4344	1.72671e-25	1.82924e-23	1162.52	342.556	129.598	65.4228	70807	NM_027560
B3gnt9	32.3088	-1.88377	0.268429	-7.01776	2.25452e-12	4.00829e-11	10.3138	5.39303	44.7802	1.65917	97440	NM_001271915
Casp3	21.207	-1.63388	0.280093	-5.83336	5.43211e-09	5.373e-08	8.50264	5.32093	29.5459	4.49718	12367	NM_001284409
Cd209a	26.8649	-1.94313	0.342798	-5.66843	1.4411e-08	1.3122e-07	4.4194	4.72891	18.2084	3.82167	170786	NM_133238
Cdh11	40.4421	-3.68703	0.446448	-8.25859	1.47408e-16	5.24152e-15	5.57684	2.47638	63.8705	20.0825	12552	NM_009866
Cilp2	51.6521	-5.06856	0.409461	-12.3786	3.41141e-35	8.18791e-33	4.22035	2.41292	133.985	32.2397	68709	NM_026818
Cmtm3	91.7324	-1.44111	0.196075	-7.34976	1.98558e-13	4.27178e-12	38.3006	10.6098	110.645	8.41204	68119	NM_024217
Col4a1	2581.69	-1.32091	0.145572	-9.07393	1.14795e-19	6.23099e-18	1244.21	194.027	3273.36	517.748	12826	NM_009931
Col4a2	1869.46	-1.28435	0.158283	-8.11425	4.88811e-16	1.61824e-14	933.05	131.784	2411.87	430.994	12827	NM_009932
Comp	108.807	-2.87697	0.380894	-7.55321	4.24667e-14	1.0404e-12	18.5502	12.9778	129.76	36.4876	12845	NM_016685
Cotl1	176.705	-1.73444	0.232893	-7.44735	9.5232e-14	2.18012e-12	63.9692	19.745	225.49	83.753	72042	NM_028071
Cpne2	156.332	1.6851	0.189701	8.88294	6.51162e-19	3.22661e-17	174.472	47.9443	59.3916	8.60493	234577	NM_153507
Csgalnact1	37.0694	-1.43541	0.248967	-5.76547	8.14314e-09	7.76454e-08	17.4685	6.47889	49.679	4.73544	234356	NM_001252623
Ddx60	27.5151	-2.03684	0.382944	-5.31891	1.04392e-07	7.90715e-07	7.52334	5.36462	38.3623	11.2875	234311	NM_001081215
Ednra	56.7235	-1.65817	0.274732	-6.03559	1.58383e-09	1.72548e-08	20.6135	8.71651	69.7466	13.332	13617	NM_010332
Fam96b	208.948	1.16679	0.147863	7.89106	2.99619e-15	8.83386e-14	212.41	28.9814	93.426	10.7316	NA	NA
Fat1	207.045	-1.0817	0.19495	-5.5486	2.87965e-08	2.46294e-07	101.036	31.4145	221.448	35.8316	14107	NM_001081286
Gabarapl2	388.883	1.0963	0.135838	8.07067	6.99142e-16	2.24207e-14	365.898	38.0588	165.359	12.1563	93739	NM_026693
Gm10638	20.1167	2.44833	0.409833	5.97396	2.31565e-09	2.45147e-08	28.7718	11.4821	4.54929	2.33203	666945	NR_027829
Gpr124	105.056	-1.07632	0.223981	-4.80542	1.54426e-06	9.17132e-06	52.8491	15.5391	121.711	16.1144	NA	NA
Has3	32.3758	-2.0237	0.274882	-7.36207	1.81082e-13	3.93956e-12	14.2287	5.29077	60.0541	11.3213	15118	NM_001331048
Hp	461.515	-2.21057	0.341055	-6.48155	9.0783e-11	1.26087e-09	134.081	83.5171	597.625	52.6276	15439	NM_001329965
Hpgd	59.6465	-1.16006	0.230747	-5.0274	4.97162e-07	3.28046e-06	25.2956	5.88509	56.8381	13.1527	15446	NM_008278
Hsf4	69.8342	1.07234	0.201424	5.32381	1.01617e-07	7.71975e-07	69.1298	14.0979	32.649	3.37956	26386	NM_001256042
Ifi30	129.688	-1.06426	0.219114	-4.85709	1.19122e-06	7.24398e-06	66.288	17.0949	145.873	45.0444	65972	NM_023065
Il27ra	14.4166	-3.24023	0.626865	-5.16894	2.35426e-07	1.65509e-06	2.61488	2.14969	27.4018	28.9068	50931	NM_016671
Inpp4b	66.6589	-1.04656	0.20629	-5.07325	3.91086e-07	2.64141e-06	34.9622	9.54847	74.7952	11.0124	234515	NM_001024617
Irf2bp2	428.268	1.06537	0.146806	7.25698	3.95829e-13	8.08183e-12	408.817	51.2824	202.124	26.2403	270110	NM_001164598
Irx3	30.146	1.58578	0.282453	5.61433	1.97321e-08	1.75408e-07	36.3177	5.46896	11.8142	1.92304	16373	NM_001253822
Isyna1	56.3458	-1.48124	0.258941	-5.72038	1.06284e-08	9.90668e-08	24.9372	8.2753	75.3081	14.6334	71780	NM_023627
Kbtbd11	79.9151	-2.58152	0.361915	-7.13294	9.8248e-13	1.88413e-11	21.4646	10.8717	120.983	50.7599	74901	NM_029116
2021-03-01	34.0545	-2.10701	0.332356	-6.33962	2.3033e-10	2.94106e-09	6.6772	3.14331	31.8906	12.7619	NA	NA
Mcf2l	455.52	1.1579	0.147954	7.82609	5.03264e-15	1.41847e-13	401.107	60.6652	192.952	19.7455	17207	NM_001159485
Mlkl	13.5867	-1.81673	0.360367	-5.04132	4.62334e-07	3.07575e-06	4.87245	1.89219	17.1353	4.82544	74568	NM_001310613
Mlycd	804.293	1.62092	0.116205	13.9488	3.19969e-44	1.69484e-41	836.213	146.042	270.617	30.9368	56690	NM_001364328
Mmp2	769.704	-2.33794	0.126837	-18.4327	7.18703e-76	1.65386e-72	252.876	36.8504	1286.15	143.55	17390	NM_008610
Mt1	532.398	1.92471	0.288752	6.6656	2.6358e-11	3.93093e-10	468.59	224.276	117.499	19.4553	17748	NM_013602
Mt2	392.168	2.60975	0.279319	9.34325	9.34254e-21	6.08096e-19	342.127	152.488	53.5147	9.01125	17750	NM_008630
Neto2	43.9366	2.28938	0.310072	7.38338	1.54319e-13	3.38158e-12	32.7548	10.5059	7.00521	2.95256	74513	NM_001081324
Nqo1	195.069	1.60232	0.145806	10.9894	4.29919e-28	5.89641e-26	216.988	15.0313	70.6985	9.91078	18104	NM_008706
Palld	369.142	-1.02988	0.133197	-7.73199	1.05881e-14	2.8042e-13	220.119	19.7927	451.004	68.0157	72333	NM_001081390
Pdgfrl	30.3254	-2.56519	0.357517	-7.175	7.23052e-13	1.41128e-11	9.21922	5.07895	58.8912	17.8037	68797	NM_026840
Plat	106.744	-1.68674	0.239857	-7.0323	2.03161e-12	3.65856e-11	39.2011	6.78508	128.607	17.983	18791	NM_008872
Plcg2	53.2693	-1.98191	0.333987	-5.9341	2.95469e-09	3.05637e-08	16.1645	2.81151	68.2019	40.9275	234779	NM_172285
Pllp	31.4413	-1.28977	0.287075	-4.49279	7.02959e-06	3.58718e-05	14.9813	8.4505	36.4741	6.83571	67801	NM_026385
Ppp1r3b	36.9498	-2.96618	0.416006	-7.13014	1.00264e-12	1.91086e-11	11.9807	7.68633	86.2278	34.8521	244416	NM_001364450
Rasd2	631.691	2.59904	0.173863	14.9487	1.5872e-50	1.21905e-47	608.611	92.773	96.8603	21.958	75141	NM_029182
Rhou	326.325	1.14678	0.137597	8.33435	7.79225e-17	2.89123e-15	276.877	23.7422	127.246	24.0236	69581	NM_133955
Rrad	72.3188	1.69888	0.314879	5.39535	6.83904e-08	5.40404e-07	92.0134	39.4379	32.2772	14.2474	56437	NM_019662
Sc4mol	44.9336	-1.48152	0.238659	-6.20769	5.37689e-10	6.38781e-09	24.0431	10.0975	66.3819	6.08364	NA	NA
Smpd3	98.2492	-2.68107	0.29855	-8.98032	2.69991e-19	1.41547e-17	25.1831	13.4229	161.439	51.1983	58994	NM_021491
Sntb2	84.3093	-1.18044	0.209325	-5.63928	1.70758e-08	1.53303e-07	39.6387	18.7117	95.2138	4.4523	20650	NM_001368316
Sorbs2	722.789	1.69833	0.137102	12.3873	3.06092e-35	7.4633e-33	697.191	62.2212	211.16	28.8679	234214	NM_001205219
Tll1	12.6744	-2.31351	0.50392	-4.59103	4.41074e-06	2.36487e-05	3.82694	2.57198	16.0958	7.41431	21892	NM_009390
Tusc3	39.0492	-1.44973	0.262717	-5.51822	3.42452e-08	2.88875e-07	14.9612	5.14916	42.0319	7.08777	80286	NM_001357304
Uba52	2146.98	1.13378	0.128294	8.83734	9.80208e-19	4.7349e-17	1749.17	150.337	769.746	88.607	22186	NM_001348227
Zfhx3	475.401	1.15182	0.172413	6.68062	2.37929e-11	3.58317e-10	486.309	64.9472	223.595	71.6617	11906	NM_007496
Zfp90	16.8358	-1.52791	0.335968	-4.5478	5.42095e-06	2.84688e-05	5.53055	2.8622	19.6955	5.20712	22751	NM_001368328
1190002N15Rik	80.6652	-1.25389	0.197329	-6.35428	2.09404e-10	2.70081e-09	45.9228	13.7009	108.479	20.3054	NA	NA
2310030G06Rik	35.1051	1.11569	0.250516	4.45356	8.44571e-06	4.23278e-05	44.3637	13.9583	19.9154	5.28062	66952	NM_025865
6030419C18Rik	110.174	1.15307	0.159685	7.2209	5.16458e-13	1.03164e-11	116.623	9.35197	53.1707	9.51053	NA	NA
6430571L13Rik	271.302	-1.10275	0.165704	-6.65492	2.83452e-11	4.21093e-10	177.26	33.0793	374.921	84.1171	235599	NM_175486
9530091C08Rik	179.708	1.2296	0.155046	7.93055	2.18184e-15	6.57162e-14	185.707	12.078	76.5748	14.4444	320440	NM_177159
AI118078	59.7217	1.72595	0.208804	8.2659	1.38647e-16	4.97606e-15	61.0216	6.5846	18.3729	5.23899	NA	NA
AW551984	20.1208	-4.67104	0.502126	-9.30252	1.37153e-20	8.56423e-19	0.93005	0.670598	48.112	9.33421	244810	NM_001199556
Acp5	200.591	-2.29627	0.252913	-9.07932	1.0926e-19	5.97275e-18	64.8566	22.1884	307.25	142.307	11433	NM_001102404
Adamts8	17.3346	-3.08483	0.359227	-8.5874	8.89609e-18	3.76454e-16	4.7935	1.16647	40.0494	13.7882	30806	NM_001326292
Aldh1a2	22.6273	-1.56718	0.353977	-4.42736	9.53914e-06	4.73138e-05	9.9198	5.31857	28.087	8.70546	19378	NM_009022
Anapc13	459.673	1.24932	0.150158	8.32005	8.79282e-17	3.239e-15	460.823	54.6581	191.261	23.3015	69010	NM_181394
Arhgap20	236.511	-1.08557	0.173801	-6.24606	4.2094e-10	5.0954e-09	136.588	32.3124	277.45	51.6159	244867	NM_175535
Arpp21	48.4201	-1.50805	0.265325	-5.68377	1.31761e-08	1.20949e-07	22.0666	8.70882	75.358	14.0145	74100	NM_001177615
Atp5l	1355.67	1.01327	0.140578	7.20785	5.68433e-13	1.12959e-11	550.982	59.0946	258.615	20.6753	27425	NM_013795
BC049352	10.3939	2.54362	0.456074	5.5772	2.44415e-08	2.13442e-07	11.8656	3.10248	1.84024	1.3595	408059	NM_001198971
Bmp5	58.4836	-1.26073	0.231811	-5.43861	5.36991e-08	4.34372e-07	22.4721	9.07121	61.2813	4.27326	12160	NM_007555
Ccr1	13.9406	-3.18125	0.589113	-5.40006	6.6617e-08	5.2885e-07	2.29117	2.69242	18.8261	7.96924	12768	NM_009912
Ccr2	81.5994	-1.99853	0.340314	-5.87261	4.28993e-09	4.31549e-08	31.0536	23.3844	117.597	55.276	12772	NM_009915
Ccr5	21.7925	-2.69719	0.415709	-6.48815	8.68962e-11	1.21017e-09	4.24781	3.23754	30.4275	13.1644	12774	NM_009917
Cd109	22.7908	-2.87126	0.342268	-8.38893	4.90602e-17	1.87001e-15	5.21003	2.85812	37.8008	6.35092	235505	NM_153098
Cd276	26.0513	-2.39039	0.348922	-6.85078	7.34494e-12	1.20027e-10	7.19682	2.5108	45.5741	11.7582	102657	NM_133983
Cdon	213.003	-1.5263	0.169269	-9.01701	1.93301e-19	1.03101e-17	98.3657	12.5032	274.331	25.1274	57810	NM_021339
Cgnl1	278.047	-1.00866	0.132272	-7.62569	2.42737e-14	6.1327e-13	133.233	22.6012	265.167	19.242	68178	NM_001304362
Cish	46.1949	-2.51873	0.394573	-6.38344	1.73154e-10	2.28115e-09	15.9627	7.73911	95.7214	58.4404	12700	NM_001317354
Clec3b	680.065	-1.59806	0.12311	-12.9808	1.57293e-38	4.83236e-36	245.664	41.0373	748.167	102.193	21922	NM_011606
Clmp	82.8719	-1.77619	0.192065	-9.24788	2.28997e-20	1.38489e-18	31.9021	6.27357	102.983	21.4611	71566	NM_133733
Cmtm6	196.518	-1.12512	0.134244	-8.38121	5.23858e-17	1.98691e-15	96.4111	11.1545	209.313	26.1815	67213	NM_026036
Col12a1	175.061	-3.14148	0.252482	-12.4424	1.53795e-35	3.93741e-33	40.1423	20.7958	340.25	61.7454	12816	NM_001290308
Col5a3	435.935	-1.77295	0.207494	-8.54459	1.28999e-17	5.29825e-16	207.918	60.9244	718.42	152.195	53867	NM_001317388
Col6a5	30.6766	-4.53435	0.755376	-6.00277	1.93975e-09	2.08221e-08	2.18853	1.82385	51.0973	31.4672	665033	NM_001167923
Col6a6	66.8905	-2.72123	0.317491	-8.57107	1.02528e-17	4.31487e-16	19.5579	8.26874	128.472	50.1269	245026	NM_001102607
Col7a1	66.9225	1.80707	0.255694	7.06733	1.57944e-12	2.88488e-11	85.6682	20.302	22.0367	6.58937	12836	NM_007738
Cox7a2	1369.4	1.18976	0.147755	8.05221	8.13148e-16	2.59683e-14	1400.82	150.619	583.041	32.0743	12866	NM_009945
Cryab	5667.5	1.07326	0.118233	9.07743	1.11169e-19	6.05557e-18	5791.5	827.687	2780.07	290.035	12955	NM_001289782
Csk	144.077	-1.06029	0.196135	-5.40589	6.44888e-08	5.13803e-07	78.5768	10.4681	163.744	44.3252	12988	NM_001304761
Ctsh	179.504	-1.79369	0.219802	-8.16049	3.33674e-16	1.13147e-14	60.5842	25.8587	213.14	52.3069	13036	NM_001312649
Deb1	339.711	1.06381	0.169699	6.2688	3.63833e-10	4.46392e-09	342.547	48.8737	155.225	13.5695	NA	NA
Dennd4a	92.3674	-1.70213	0.1782	-9.55183	1.27427e-21	9.1897e-20	35.04	9.28194	116.014	26.1147	102442	NM_001162917
Dixdc1	38.6786	-1.55452	0.234441	-6.63074	3.34012e-11	4.90512e-10	16.3793	3.70149	50.8118	10.1158	330938	NM_001311069
Dpy19l1	99.5993	-1.37754	0.190679	-7.22436	5.03478e-13	1.00834e-11	43.4193	5.50822	114.48	36.9745	244745	NM_001359948
Fam198a	10.2178	-2.49512	0.553885	-4.50477	6.64463e-06	3.41822e-05	2.52828	2.68901	18.9014	5.12347	NA	NA
Fam46a	163.783	-1.28492	0.176962	-7.261	3.84237e-13	7.88019e-12	74.1857	17.7181	170.787	37.0486	NA	NA
Fam96a	294.715	1.05029	0.133814	7.84888	4.19776e-15	1.20527e-13	323.978	42.7646	148.441	17.0174	NA	NA
Fbxl22	48.4286	-1.11481	0.197888	-5.63357	1.76515e-08	1.5801e-07	33.7661	7.32375	72.7038	14.487	74165	NM_175206
Fdx1l	27.5631	1.32024	0.285273	4.62799	3.69239e-06	2.01703e-05	29.2324	8.66353	11.7116	3.52216	NA	NA
Gadl1	18.0908	-1.87477	0.389254	-4.81633	1.46225e-06	8.72977e-06	9.52642	6.1947	31.0135	9.59164	73748	NM_028638
Glb1	58.6831	-1.90343	0.271737	-7.00469	2.47532e-12	4.3655e-11	18.4036	9.4139	78.4539	21.1767	12091	NM_009752
Gm6484	8.8972	-3.85424	0.84024	-4.58708	4.49499e-06	2.40751e-05	2.05039	2.83068	24.1707	13.7625	NA	NA
Il10ra	41.544	-1.59905	0.323238	-4.94699	7.53688e-07	4.78801e-06	15.013	5.24251	48.4087	21.9398	16154	NM_001324486
Islr	552.166	-1.45461	0.124473	-11.6862	1.49917e-31	2.83341e-29	245.888	54.6689	671.002	50.1064	26968	NM_001195431
Islr2	42.2902	-1.58617	0.322441	-4.91926	8.68708e-07	5.44885e-06	16.6616	13.3289	49.0472	6.34371	320563	NM_001161535
Itga11	97.5238	-1.62939	0.207616	-7.84809	4.22407e-15	1.2083e-13	39.2327	9.9624	122.856	20.6787	319480	NM_176922
Ky	1622.63	-1.76006	0.259842	-6.77359	1.25626e-11	1.99974e-10	731.849	182.286	2662.9	597.316	16716	NM_024291
Lars2	36989.6	1.46632	0.145209	10.0979	5.64115e-24	5.25174e-22	45247.4	5533.63	15994.8	2404.25	102436	NM_001348167
Ldlr	110.564	-2.21605	0.175705	-12.6123	1.80538e-36	5.13565e-34	38.3459	11.5491	192.249	17.3737	16835	NM_001252658
Loxl1	297.79	-1.79705	0.138242	-12.9993	1.23407e-38	3.94928e-36	130.894	24.4415	449.744	50.9406	16949	NM_010729
Lrrc2	856.816	1.76502	0.117997	14.9582	1.37609e-50	1.11253e-47	858.62	88.7381	255.552	32.1079	74249	NM_028838
Mst1r	22.9262	-1.37448	0.309549	-4.44028	8.98417e-06	4.47925e-05	9.18805	3.61185	24.5186	2.18331	19882	NM_001287261
Naalad2	65.892	-1.12117	0.188063	-5.96167	2.49678e-09	2.61796e-08	32.0479	9.67623	67.3056	5.19698	72560	NM_001357399
Oaf	111.498	-1.30428	0.173844	-7.50261	6.2559e-14	1.48223e-12	60.4344	8.16404	156.175	28.3543	102644	NM_178644
Opcml	39.9469	-1.16277	0.248417	-4.6807	2.85892e-06	1.61574e-05	17.1343	4.81541	41.1126	3.15925	330908	NM_177906
Paqr9	32.605	-1.76688	0.346615	-5.09753	3.44122e-07	2.34623e-06	14.068	7.90445	48.9834	13.8388	75552	NM_198414
Plekho2	151.189	-1.17579	0.158477	-7.41932	1.17722e-13	2.64761e-12	71.7568	15.1555	171.683	18.9488	102595	NM_153119
Pth1r	49.8555	-1.79247	0.266938	-6.71494	1.88141e-11	2.88715e-10	24.0269	9.2977	76.2814	22.0162	19228	NM_001083935
Rab3d	155.235	-1.00906	0.169613	-5.94919	2.69466e-09	2.80629e-08	80.7326	33.6645	155.458	12.6815	19340	NM_001324531
Rbp1	53.8429	-1.28692	0.252354	-5.09967	3.4025e-07	2.32189e-06	26.1643	7.67218	58.6311	11.2972	19659	NM_011254
Rplp1	4027.18	1.06392	0.145237	7.32541	2.38174e-13	5.04314e-12	3683.11	503.517	1690.85	203.881	56040	NM_018853
Rps27l	664.007	1.24128	0.172321	7.2033	5.87734e-13	1.16193e-11	694.592	89.3774	282.147	31.4671	67941	NM_001311101
S1pr2	38.5375	-2.22911	0.295156	-7.5523	4.27638e-14	1.04601e-12	11.4181	8.32827	59.1492	7.78309	14739	NM_010333
Scamp5	33.7871	-1.42659	0.282676	-5.04675	4.49399e-07	2.99552e-06	13.5495	5.47519	39.8003	9.54244	56807	NM_001301634
Scg3	15.0059	-2.76381	0.434691	-6.3581	2.04267e-10	2.64343e-09	2.6986	1.80497	20.6633	7.39689	20255	NM_001164790
Scn3b	15.6832	-2.3067	0.453182	-5.09001	3.58047e-07	2.43254e-06	4.19961	1.54085	26.3952	7.02258	235281	NM_001083917
Shisa5	311.006	-1.08504	0.208856	-5.19518	2.0452e-07	1.45783e-06	148.851	32.5255	326.683	116.526	66940	NM_001284332
Slc36a4	20.3046	-2.25498	0.328248	-6.86973	6.43239e-12	1.0579e-10	5.21047	3.11367	24.601	2.05956	234967	NM_001357565
Slc37a2	21.7257	-2.15085	0.413589	-5.20046	1.98791e-07	1.41963e-06	6.57614	4.24108	31.2073	17.1417	56857	NM_001145960
Slc9a9	45.6662	-1.58697	0.240225	-6.60618	3.94367e-11	5.7475e-10	18.6147	6.28301	57.5205	12.262	331004	NM_177909
Slco2a1	79.5526	-1.52113	0.239087	-6.36225	1.9882e-10	2.57945e-09	26.469	14.9332	79.9281	6.22498	24059	NM_033314
Sln	154.517	1.68227	0.274213	6.13491	8.52072e-10	9.7169e-09	167.726	47.9422	55.4131	18.4337	66402	NM_025540
St3gal4	64.386	-1.0593	0.231015	-4.58542	4.5308e-06	2.425e-05	30.606	10.38	66.4718	14.6994	20443	NM_009178
Tbc1d2b	188.392	-1.45633	0.165365	-8.80676	1.28811e-18	6.08822e-17	75.3025	20.946	218.502	25.1049	67016	NM_194334
Tgfbr2	684.596	-1.25713	0.12972	-9.69111	3.28949e-22	2.47696e-20	290.668	48.4331	720.946	78.2526	21813	NM_009371
Thy1	201.638	-1.55646	0.188499	-8.25711	1.49241e-16	5.29443e-15	84.4828	12.3527	246.928	54.9686	21838	NM_009382
Timm8b	723.693	1.0948	0.138984	7.87713	3.34999e-15	9.78313e-14	705.709	48.6681	314.434	16.6451	30057	NM_013897
Tlr9	14.9988	-2.52326	0.516228	-4.88787	1.01935e-06	6.31381e-06	3.01753	1.9023	19.4519	11.6989	81897	NM_031178
Tma7	604.103	1.58094	0.174023	9.08467	1.04015e-19	5.70871e-18	663.573	63.9403	213.469	20.9335	66167	NM_183250
Tmppe	45.4158	-1.40134	0.237964	-5.88886	3.88868e-09	3.94284e-08	19.0806	6.93568	47.3734	8.9037	100504715	NM_001200002
Trf	1678.94	-1.00064	0.223987	-4.46739	7.91812e-06	3.99312e-05	543.437	228.915	1047.21	156.978	22041	NM_133977
Trim29	7.27903	-3.43005	0.754475	-4.54627	5.46049e-06	2.86569e-05	0.944149	0.669305	11.2441	5.94806	72169	NM_023655
Ubash3b	13.2902	-2.13911	0.474219	-4.51081	6.45812e-06	3.33792e-05	4.22839	2.74089	18.823	9.84188	72828	NM_001357412
Ubl5	493.979	1.02393	0.150615	6.7983	1.05857e-11	1.69914e-10	501.475	57.7645	240.05	18.4983	66177	NM_001310746
Zbtb16	1736.71	2.537	0.17672	14.356	9.76776e-47	6.52359e-44	1637.74	87.7209	279.512	89.6668	235320	NM_001033324
Zbtb44	487.737	1.02821	0.119297	8.61892	6.75875e-18	2.9328e-16	530.931	39.5499	257.478	49.8035	235132	NM_001115130
Zfp810	16.0371	-2.04611	0.399765	-5.11829	3.08319e-07	2.11244e-06	4.70915	3.65202	20.1432	6.44443	235050	NM_145612

## Sheet: sigDEGs_28m_vs_2m
Supplementary File 1. Differentially expressed genes among the age groups.
symbol	baseMean	log2FoldChange	lfcSE	stat	pvalue	padj	mean_WT_Muscle_28m	sd_WT_Muscle_28m	mean_WT_Muscle_2m	sd_WT_Muscle_2m	entrez	refseq
4933415F23Rik	8.79099	3.45238	0.736385	4.68828	2.75507e-06	4.50066e-05	10.2877	8.9872	0.794479	1.04595	NA	NA
AI607873	195.07	1.26522	0.229522	5.5124	3.53968e-08	9.10399e-07	214.878	66.3374	95.4643	15.6975	NA	NA
Angptl1	102.985	-1.89682	0.232202	-8.16887	3.11301e-16	2.78767e-14	42.3214	12.5008	182.721	50.3501	72713	NM_028333
Aox3	16.2388	2.87942	0.486689	5.91636	3.29153e-09	1.02197e-07	27.2681	23.7716	4.38472	2.1582	71724	NM_023617
Asb18	84.1766	-1.31047	0.197545	-6.63379	3.27173e-11	1.42155e-09	46.74	14.5839	102.956	14.9791	208372	NM_001355134
C130026I21Rik	18.1033	7.27824	0.951222	7.65146	1.98703e-14	1.43751e-12	175.293	326.68	0.216621	0.324549	620078	NM_001037909
Cdk18	62.1042	1.22615	0.189046	6.48596	8.81666e-11	3.56698e-09	55.6993	16.6563	23.8417	2.77938	18557	NM_008795
Chrng	7.48838	3.78497	0.781018	4.8462	1.25849e-06	2.27614e-05	12.3787	14.0264	0.574468	0.813678	11449	NM_009604
Col3a1	4137.91	-3.29046	0.296511	-11.0973	1.2934e-28	4.04146e-26	994.979	430.876	9655.29	1818.32	12825	NM_009930
Col5a2	546.025	-2.50318	0.193767	-12.9185	3.54054e-38	2.47601e-35	198.133	57.7751	1144.7	181.65	12832	NM_007737
Col6a3	1211.5	-2.13143	0.17729	-12.0222	2.71481e-33	1.28612e-30	462.993	124.108	2013.81	329.271	12835	NM_001243008
D1Ertd622e	116.406	-1.17208	0.159511	-7.34795	2.01268e-13	1.27957e-11	80.0952	24.3157	155.874	18.1169	NA	NA
Dusp10	273.991	-2.5538	0.188441	-13.5522	7.68764e-42	7.05629e-39	98.358	32.6029	439.4	20.4883	63953	NM_022019
Dusp27	515.812	-1.03097	0.134967	-7.63864	2.19524e-14	1.57265e-12	322.428	93.8612	619.845	16.957	240892	NM_001033344
Fam117b	192.6	1.70089	0.164543	10.3371	4.78995e-25	1.11659e-22	252.549	43.0837	76.4084	8.50188	72750	NM_001037725
Fn1	2367.6	-1.10603	0.249663	-4.43009	9.41953e-06	0.000129892	1393.1	560.499	3096.18	397.285	14268	NM_001276408
G0s2	321.305	-1.49432	0.238307	-6.27057	3.59728e-10	1.34015e-08	144.546	45.1981	338.526	82.1457	14373	NM_008059
Glul	8551.03	1.71361	0.178579	9.59584	8.3235e-22	1.43811e-19	6272.76	667.796	2178.28	180.602	14645	NM_008131
Grem2	78.9089	-2.01717	0.245157	-8.22804	1.903e-16	1.78009e-14	32.2065	19.9467	177.139	40.7781	23893	NM_011825
Hdac4	288.348	1.20774	0.204128	5.91658	3.28698e-09	1.02197e-07	323.795	131.036	150.226	27.8242	208727	NM_207225
Hecw2	105.16	1.37214	0.226528	6.05725	1.38471e-09	4.64288e-08	119.306	30.792	47.3256	6.61353	329152	NM_001001883
Hmcn1	33.0485	-1.32297	0.297873	-4.44139	8.93801e-06	0.00012421	18.3434	8.77367	48.8561	5.04154	545370	NM_001024720
Hmga2-ps1	105.567	2.73333	0.288134	9.48631	2.39361e-21	4.04053e-19	92.2587	31.5472	12.4313	4.7427	15365	NR_037996
Hsd17b7	103.414	1.09768	0.223393	4.91367	8.93849e-07	1.67224e-05	76.8536	24.8261	44.986	11.645	15490	NM_010476
Ifi205	202.958	1.53883	0.204261	7.53367	4.93319e-14	3.35412e-12	160.23	49.5363	67.2978	19.5541	226695	NM_172648
Igfn1	1092.31	1.49311	0.217503	6.86475	6.66094e-12	3.23916e-10	962.585	328.268	351.966	104.946	226438	NM_177642
Klhdc8a	5.65709	4.12215	0.724457	5.68998	1.27052e-08	3.54059e-07	11.6978	7.33319	1.03212	0.62026	213417	NM_144810
Lamc1	1597.03	-1.04972	0.1313	-7.9948	1.29781e-15	1.06478e-13	922.25	170.231	1889.3	180.793	226519	NM_010683
Lrrc52	26.4378	3.84498	0.482098	7.97553	1.51732e-15	1.23113e-13	26.16	13.1957	1.7558	1.49301	240899	NM_001013382
Mettl21c	247.372	-1.31236	0.205714	-6.37953	1.77627e-10	6.8648e-09	114.531	33.7374	256.713	43.1402	433294	NM_001013799
Mettl21e	55.7037	-1.9671	0.348522	-5.64413	1.66022e-08	4.54889e-07	17.4728	7.0729	65.7468	25.7726	403183	NM_207281
Mlph	10.9015	2.09383	0.442668	4.73001	2.24507e-06	3.78543e-05	15.458	10.485	4.93596	2.32654	171531	NM_053015
Mpz	1273.25	-1.16793	0.198533	-5.88282	4.03326e-09	1.22381e-07	851.095	231.136	1969.67	479.456	17528	NM_001315499
Neu2	153.686	-1.19658	0.145578	-8.21953	2.04299e-16	1.887e-14	84.8534	20.985	204.096	20.6138	23956	NM_001160163
Olfml2b	113.989	-2.17708	0.238495	-9.12843	6.95008e-20	9.43811e-18	51.436	7.68434	231.111	37.3495	320078	NM_177068
Pik3c2b	232.231	-1.04336	0.148817	-7.01101	2.36603e-12	1.23218e-10	171.042	70.1891	235.629	37.6552	240752	NM_001099276
Plcd4	750.172	-1.39911	0.123267	-11.3503	7.39246e-30	2.85699e-27	340.904	80.3226	919.034	61.0995	18802	NM_001081456
Ramp1	225.662	-1.07791	0.170991	-6.3039	2.90252e-10	1.09862e-08	104.218	24.3626	231.772	18.3475	51801	NM_001168392
Spats2l	32.5816	-1.46888	0.285569	-5.1437	2.69373e-07	5.6894e-06	19.466	8.61132	58.2541	4.31263	67198	NM_001164566
Steap3	373.145	-1.28758	0.112601	-11.4349	2.79898e-30	1.11097e-27	202.032	37.6172	475.083	39.3746	68428	NM_001085409
Tfcp2l1	124.28	3.79737	0.434948	8.73062	2.5328e-18	2.97574e-16	140.832	101.657	9.48429	4.38503	81879	NM_023755
Zdbf2	9.9938	-2.34669	0.43978	-5.33605	9.4995e-08	2.24653e-06	4.03	1.74943	21.8802	6.58924	73884	NM_001267872
Acss3	90.2101	1.30799	0.223915	5.84148	5.17391e-09	1.54439e-07	81.3645	38.5654	44.8644	7.65897	380660	NM_001142804
Adamts14	12.7569	-1.91574	0.367495	-5.21295	1.85858e-07	4.12312e-06	8.76337	5.60353	22.4803	8.03767	237360	NM_001081127
Aldh1l2	34.451	-2.09824	0.291806	-7.19053	6.45387e-13	3.65952e-11	17.1219	3.33569	62.8675	14.5348	216188	NM_153543
Cep85l	458.515	1.50106	0.216362	6.93773	3.98447e-12	2.00397e-10	474.566	123.221	186.706	41.7366	100038725	NM_001204983
Col10a1	6.75863	-4.72643	0.991896	-4.76504	1.88813e-06	3.25076e-05	1.32769	1.80178	19.1048	22.3587	12813	NM_009925
Col6a1	1314.83	-1.85479	0.189554	-9.78502	1.30574e-22	2.4579e-20	563.177	203.861	2095.23	194.905	12833	NM_009933
Col6a2	1132.87	-1.82243	0.216016	-8.43656	3.26818e-17	3.288e-15	500.712	222.945	1847.25	239.608	12834	NM_001347207
Ctgf	346.641	1.16857	0.22962	5.08912	3.59724e-07	7.38867e-06	345.739	121.162	191.961	77.9724	NA	NA
Gadd45b	210.21	-1.54367	0.206621	-7.47103	7.95704e-14	5.21683e-12	113.025	44.1656	260.534	49.9588	17873	NM_008655
Glt8d2	30.0562	-1.3606	0.27271	-4.98919	6.06337e-07	1.17943e-05	13.0921	8.15493	46.7103	10.4542	74782	NM_029102
Igf1	348.885	-1.2474	0.176779	-7.05626	1.71042e-12	9.03568e-11	212.385	77.4477	575.723	93.7079	16000	NM_001111274
Kera	81.7324	-3.69539	0.312066	-11.8417	2.3764e-32	1.09062e-29	12.6516	12.7337	226.597	38.0599	16545	NM_008438
Lingo3	82.1793	-1.51902	0.206043	-7.37234	1.67664e-13	1.07996e-11	41.518	10.24	140.852	17.845	237403	NM_001013758
Lss	30.286	-1.21612	0.258133	-4.71123	2.46227e-06	4.08597e-05	22.6603	7.9844	48.6404	12.4542	16987	NM_146006
Odf3l2	377.091	3.24727	0.512681	6.33389	2.39057e-10	9.16655e-09	131.64	88.9626	11.2402	6.40667	382384	NM_001033473
Stab2	76.05	1.34867	0.285385	4.72577	2.29241e-06	3.83881e-05	80.5405	50.236	37.7065	13.4561	192188	NM_138673
Tet1	25.0139	-2.97118	0.374917	-7.9249	2.28334e-15	1.82245e-13	7.95635	4.55617	58.0217	16.1475	52463	NM_001253857
Unc5b	69.5659	-1.15745	0.245398	-4.71661	2.39804e-06	3.98841e-05	39.3254	8.60471	99.5848	34.6128	107449	NM_001359273
Vnn3	19.431	1.92012	0.376504	5.09987	3.39893e-07	7.01078e-06	26.7866	14.3108	9.58566	3.59788	26464	NM_011979
Wif1	18.5286	-3.68407	0.396196	-9.29859	1.42327e-20	2.11133e-18	2.64907	2.04406	44.4065	6.17251	24117	NM_011915
2310065F04Rik	486.189	-1.4502	0.213118	-6.80471	1.01252e-11	4.78129e-10	162.858	69.2841	452.611	89.9776	74184	NR_038055
Acaca	987.199	-1.59095	0.336403	-4.7293	2.25291e-06	3.79149e-05	455.129	215.153	1915.63	484.646	107476	NM_133360
Acly	1188.16	-2.58147	0.276206	-9.34618	9.08664e-21	1.4047e-18	478.446	253.119	3018.03	1051.86	104112	NM_001199296
Adam19	99.7529	-1.28353	0.240753	-5.33132	9.74992e-08	2.30205e-06	96.9705	87.7342	140.53	33.947	11492	NM_001291890
Adamts2	235.964	-1.6175	0.18808	-8.60004	7.96893e-18	8.79938e-16	111.768	31.6599	385.114	47.9733	216725	NM_001277305
Arhgap44	114.771	1.13254	0.176467	6.41786	1.38202e-10	5.41236e-09	111.274	35.4264	53.4185	12.047	216831	NM_001099288
Bcl6b	60.5397	-1.36302	0.301091	-4.52694	5.98449e-06	8.84187e-05	35.2604	11.1386	75.6413	17.0253	12029	NM_007528
C1qtnf2	31.4645	-2.17601	0.296917	-7.32867	2.32456e-13	1.42839e-11	14.7137	4.13547	64.7653	10.4469	69183	NM_026979
Cacna1g	30.4097	-1.41994	0.31407	-4.5211	6.1519e-06	9.00427e-05	16.7369	8.32393	43.949	9.80495	12291	NM_001112813
Camk2b	1198.94	1.16554	0.152544	7.64069	2.16067e-14	1.55547e-12	994.168	292.861	446.55	99.4675	12323	NM_001174053
Ccdc69	39.301	-1.47219	0.239452	-6.14815	7.83901e-10	2.70879e-08	29.9891	14.3894	56.976	8.46646	52570	NM_177471
Ccl9	190.06	1.14659	0.25294	4.53303	5.81427e-06	8.6077e-05	213.74	107.879	120.155	34.0755	20308	NM_011338
Col1a1	2659.1	-3.7782	0.319954	-11.8086	3.52517e-32	1.56881e-29	560.039	207.531	6830.8	2195.57	12842	NM_007742
Dcakd	93.1454	-1.04429	0.20264	-5.15344	2.55749e-07	5.42764e-06	61.0382	14.036	108.07	12.0194	68087	NM_026551
Doc2b	32.7856	3.37003	0.440375	7.65264	1.9689e-14	1.43145e-12	43.4751	15.8477	4.63125	1.92855	13447	NM_007873
Dusp14	38.0297	-1.26626	0.211201	-5.99552	2.02841e-09	6.50418e-08	27.6236	2.05792	61.0335	7.15314	56405	NM_019819
Dusp18	160.642	2.08911	0.193423	10.8007	3.41452e-27	9.46143e-25	166.414	51.2163	44.2239	2.55602	75219	NM_173745
Emid1	54.4022	-1.27251	0.235411	-5.40547	6.46396e-08	1.57691e-06	26.2271	11.734	68.138	14.7321	140703	NM_001371000
Engase	71.2973	-1.00155	0.21345	-4.69218	2.70311e-06	4.42412e-05	43.8387	7.42344	89.348	18.246	217364	NM_001359368
Fam83g	21.2962	2.33826	0.404195	5.78498	7.2522e-09	2.11213e-07	25.8925	8.53048	4.20544	1.50453	69640	NM_178618
Fkbp10	72.2734	-1.59468	0.237542	-6.71326	1.90322e-11	8.69639e-10	40.5337	13.3198	124.694	20.3183	14230	NM_001163481
Gprc5c	354.029	-1.39196	0.166384	-8.36592	5.96471e-17	5.83985e-15	204.076	55.5678	553.81	65.4887	70355	NM_001110337
Hic1	128.016	-1.20254	0.241761	-4.97409	6.55556e-07	1.26179e-05	78.7845	5.43734	177.105	41.689	15248	NM_001098203
Krt222	18.472	-2.15948	0.475682	-4.53975	5.63204e-06	8.4057e-05	40.0723	76.1384	34.5243	9.55081	268481	NM_001361584
Mfap4	93.2745	-1.7654	0.287525	-6.14	8.25212e-10	2.84485e-08	44.3154	25.9813	190.067	47.369	76293	NM_001347545
Mrc2	192.279	-1.73771	0.211985	-8.19732	2.45807e-16	2.22834e-14	95.4567	22.8563	299.43	51.2717	17534	NM_008626
Phf15	194.335	1.21067	0.196566	6.1591	7.31604e-10	2.54003e-08	238.792	54.4321	89.717	17.8298	NA	NA
Polm	37.4584	-1.40055	0.289498	-4.83786	1.31248e-06	2.36503e-05	27.4071	13.8538	49.8485	8.612	54125	NM_017401
Serpinf1	838.435	-1.3904	0.172637	-8.05388	8.02072e-16	6.8088e-14	367.138	138.215	1139.76	82.7905	20317	NM_011340
Slc16a6	41.4065	-1.04193	0.202168	-5.15379	2.55275e-07	5.42542e-06	34.1781	12.0346	60.5008	12.1543	104681	NM_001029842
Slc25a35	51.4711	-1.16644	0.19591	-5.95395	2.6174e-09	8.32015e-08	30.3812	10.8382	79.6886	13.6787	71998	NM_028048
Slc6a4	11.9388	1.82802	0.402737	4.53898	5.65277e-06	8.42809e-05	12.4277	6.3989	4.80962	3.08333	15567	NM_010484
Sparc	4857.58	-1.87994	0.123394	-15.2353	2.06293e-52	3.36624e-49	1899.1	333.755	7262.88	846.204	20692	NM_001290817
Srebf1	660.942	-1.60521	0.145048	-11.0667	1.81897e-28	5.45171e-26	347.712	52.8754	968.912	60.3958	20787	NM_001313979
Tbx4	13.5426	-1.60677	0.348169	-4.61492	3.93247e-06	6.18332e-05	6.65571	3.07543	18.0199	3.946	21387	NM_011536
Tlcd2	14.3858	-2.03126	0.363055	-5.59491	2.20734e-08	5.90472e-07	7.1209	4.87305	28.1102	6.39955	380712	NM_001291156
Ttyh2	152.072	-1.19718	0.136333	-8.78128	1.61629e-18	1.96172e-16	96.7244	13.4547	209.641	10.9896	117160	NM_053273
Ubtd2	98.9752	-1.01422	0.141918	-7.14651	8.90126e-13	4.93298e-11	56.1921	6.80026	119.598	16.2948	327900	NM_001361561
Acot2	266.342	1.85363	0.187724	9.87421	5.38555e-23	1.09002e-20	151.04	67.8336	38.9641	5.87869	171210	NM_134188
Akap5	12.5144	-2.60265	0.575482	-4.52256	6.10959e-06	8.97552e-05	7.30178	5.76505	17.0643	11.8767	238276	NM_001101471
Ccdc71l	98.898	1.00423	0.126797	7.92001	2.37498e-15	1.88535e-13	106.073	20.7856	50.7214	1.666	72123	NM_001162903
Ccdc88c	350.842	-1.34922	0.119806	-11.2617	2.0284e-29	7.26561e-27	221.219	22.989	495.846	14.653	68339	NM_001362342
Dnmt3a	466.794	-1.41372	0.126695	-11.1585	6.5102e-29	2.17293e-26	270.961	43.8687	651.475	75.2425	13435	NM_001271753
Egln3	449.225	1.64754	0.199741	8.2484	1.60534e-16	1.53091e-14	513.412	129.855	208.204	18.4585	112407	NM_028133
Hhipl1	16.291	2.10632	0.399189	5.27651	1.31669e-07	3.01668e-06	23.1004	5.30794	5.08689	2.36127	214305	NM_001044380
Klf11	100.465	1.03367	0.169328	6.10454	1.03095e-09	3.51288e-08	102.533	17.9754	51.0407	8.7309	194655	NM_178357
Meg3	190.508	-2.44109	0.258703	-9.43589	3.87688e-21	6.12214e-19	62.2169	36.065	279.204	54.7898	17263	NM_144513
Plekhh1	21.3318	3.49953	0.394035	8.88128	6.60959e-19	8.29645e-17	35.2352	5.44246	3.57098	1.19753	211945	NM_181073
Pygl	208.77	-1.52201	0.276135	-5.51185	3.55088e-08	9.11682e-07	116.115	61.715	427.743	92.8282	110095	NM_133198
Rian	202.731	-2.76012	0.261309	-10.5627	4.43836e-26	1.10477e-23	58.9713	13.4621	393.956	105.246	75745	NR_028261
Rsad2	84.726	1.19233	0.212722	5.60508	2.0816e-08	5.59898e-07	109.747	51.1758	53.3055	6.05104	58185	NM_021384
Tnfaip2	345.374	-1.62171	0.189507	-8.55754	1.15306e-17	1.26372e-15	205.957	58.2376	614.385	87.0218	21928	NM_009396
Vash1	122.033	-1.06471	0.187193	-5.68775	1.28721e-08	3.57353e-07	85.9759	29.4053	162.005	16.0828	238328	NM_177354
Ankrd32	134.826	1.50752	0.14816	10.175	2.56453e-24	5.6213e-22	124.641	21.8638	42.8633	4.46418	NA	NA
Arrdc3	805.491	1.76858	0.280076	6.31464	2.70783e-10	1.03024e-08	763.99	168.756	293.431	37.0353	105171	NM_001042591
Eci3	7.42291	3.06383	0.571668	5.35946	8.34731e-08	2.00965e-06	10.1015	6.90358	1.93993	1.56434	69123	NM_026947
Ell2	288.438	1.40906	0.204955	6.87497	6.20018e-12	3.03519e-10	279.289	66.1946	117.14	13.0601	192657	NM_138953
Fgfr4	22.8166	-2.83605	0.332865	-8.52013	1.59379e-17	1.68391e-15	6.73333	4.6826	36.2573	8.36365	14186	NM_008011
Gcnt2	115.889	1.29501	0.184416	7.02224	2.18342e-12	1.14113e-10	128.374	46.6849	60.6962	14.6761	14538	NM_008105
Hspb3	144.495	-1.05626	0.178853	-5.90576	3.51026e-09	1.07849e-07	78.5381	30.7638	140.634	10.4518	56534	NM_019960
Mctp1	16.3062	1.25759	0.280248	4.48743	7.20881e-06	0.000102091	18.999	11.2591	11.4821	2.71409	78771	NM_001377108
Net1	780.698	1.42018	0.11546	12.3002	9.03762e-35	4.9158e-32	667.908	166.252	298.922	26.8832	56349	NM_001047159
Nfil3	243.012	1.4934	0.232494	6.42339	1.33276e-10	5.2334e-09	187.821	25.1516	89.1235	21.2816	18030	NM_017373
Pde4d	2382.31	1.63422	0.165986	9.84557	7.1632e-23	1.40265e-20	1782.54	514.681	656.965	132.555	238871	NM_011056
Rnf144b	395.252	1.02098	0.177731	5.74452	9.21797e-09	2.62355e-07	322.177	94.0016	155.764	27.7826	218215	NM_001170643
Sfrp4	136.831	-1.61895	0.30226	-5.35613	8.50217e-08	2.03692e-06	55.3815	23.2706	206.875	18.0629	20379	NM_016687
Bmp1	278.653	-1.21259	0.118254	-10.2542	1.13362e-24	2.56128e-22	148.014	23.5447	345.19	37.8078	12153	NM_001360021
Chdh	57.478	1.94211	0.431999	4.49564	6.93611e-06	9.88968e-05	97.5596	116.206	31.9382	7.50729	218865	NM_001136240
Fam107a	113.735	2.74855	0.411176	6.68461	2.31539e-11	1.03355e-09	157.131	42.962	24.7347	12.4323	268709	NM_001360337
Fam167a	25.0608	-1.8565	0.328568	-5.65028	1.60187e-08	4.39721e-07	13.3875	8.61656	42.2562	7.90725	219148	NM_177628
Galnt15	301.918	1.53418	0.16635	9.22262	2.89939e-20	4.09427e-18	335.023	123.034	129.985	22.6237	78754	NM_030166
Klf5	45.1661	1.19825	0.270506	4.42965	9.43875e-06	0.000130035	54.5995	21.029	25.6159	6.66612	12224	NM_009769
Loxl2	221.745	-2.02582	0.196932	-10.2869	8.07664e-25	1.85334e-22	93.9532	36.2863	417.051	67.2807	94352	NM_033325
Lrtm1	427.725	-1.58923	0.160826	-9.88163	5.00126e-23	1.03449e-20	192.538	62.9529	597.144	112.651	319476	NM_176920
Mss51	662.233	2.19068	0.319622	6.85398	7.18209e-12	3.45824e-10	367.81	139.188	66.122	23.1296	74843	NM_029104
Nid2	167.648	-1.19416	0.23298	-5.12559	2.96603e-07	6.16985e-06	102.475	23.5897	218.974	41.5105	18074	NM_008695
Ogdhl	12.8702	2.07829	0.404106	5.14294	2.70477e-07	5.69903e-06	10.5056	4.02679	2.42701	1.38587	239017	NM_001081130
Rgcc	638.711	1.87228	0.202207	9.25921	2.05941e-20	2.99451e-18	527.656	118.249	158.165	26.031	66214	NM_025427
Trim13	54.8922	-1.07037	0.178393	-6.00006	1.97243e-09	6.36638e-08	33.9053	5.36086	69.4666	2.60904	66597	NM_001164220
Trim35	1347.16	-1.05868	0.0751255	-14.0922	4.24195e-45	5.66339e-42	742.674	135.29	1473.94	95.6708	66854	NM_029979
Usp54	122.433	1.4784	0.187145	7.89974	2.79485e-15	2.19493e-13	118.062	34.302	45.6601	11.8471	78787	NM_030180
Wnt5a	56.5978	-1.64337	0.314491	-5.22551	1.73673e-07	3.88804e-06	26.5337	19.0186	92.3314	5.29459	22418	NM_001256224
Zfp503	400.391	-1.07287	0.210304	-5.10152	3.36931e-07	6.95946e-06	181.162	102.177	302.624	88.1495	218820	NM_145459
4930556M19Rik	7.75	3.0203	0.633304	4.76911	1.8504e-06	3.20082e-05	8.79018	4.41549	1.11996	0.836981	75259	NR_045063
Abra	2416.56	1.10387	0.168589	6.5477	5.84308e-11	2.42405e-09	1698.95	378.033	856.036	188.053	223513	NM_175456
Adamts12	98.3532	-1.3975	0.291798	-4.78926	1.67395e-06	2.94062e-05	57.7157	35.2969	191.51	30.6778	239337	NM_175501
Adamts20	48.0323	-2.14196	0.29882	-7.16806	7.60681e-13	4.28022e-11	23.5792	11.7749	110.877	14.0513	223838	NM_001164785
Apol11b	15.6792	3.68745	0.685818	5.37672	7.58538e-08	1.83561e-06	39.2723	38.8036	3.42778	2.93211	328563	NM_001143686
C1qtnf6	71.7757	-2.80927	0.248296	-11.3142	1.11653e-29	4.20447e-27	23.8421	6.62083	168.003	45.6566	72709	NM_001204152
Cacna1i	51.0182	3.02836	0.554827	5.4582	4.80974e-08	1.20129e-06	72.1877	42.3107	5.98521	7.11795	239556	NM_001044308
Col14a1	370.637	-1.0173	0.203308	-5.00377	5.62198e-07	1.09939e-05	248.112	93.1135	582.921	142.915	12818	NM_001368422
Col22a1	123.954	-2.0782	0.189461	-10.969	5.38749e-28	1.58241e-25	51.4835	14.2402	197.053	46.9539	69700	NM_027174
Col2a1	60.3731	-8.20503	1.17212	-7.00018	2.5563e-12	1.32656e-10	1.33195	1.34401	220.815	247.331	12824	NM_001113515
Fam134b	2322.93	1.71518	0.129813	13.2127	7.41074e-40	5.4417e-37	1919.61	394.371	674.63	92.1427	NA	NA
Fbxo32	5019.83	2.82922	0.145327	19.4679	2.05524e-84	1.00611e-80	3523.95	1136.86	553.46	126.563	67731	NM_026346
Kdelr3	39.4166	-2.3821	0.262316	-9.08104	1.07539e-19	1.42281e-17	16.4052	2.79539	82.9262	17.4177	105785	NM_134090
Klhl38	763.784	2.4132	0.144549	16.6947	1.43316e-62	4.20947e-59	599.666	174.728	119.421	22.5855	268807	NM_177755
Mafa	145.695	-1.41966	0.21398	-6.63456	3.25474e-11	1.41837e-09	85.9703	25.9677	228.201	29.1719	378435	NM_194350
Maff	43.5278	1.95325	0.301892	6.47002	9.7993e-11	3.94281e-09	57.7447	16.1377	19.0288	3.54881	17133	NM_001304830
Mkl1	258.542	-1.83335	0.133085	-13.7758	3.5631e-43	3.73769e-40	151.131	47.3275	407.676	36.8209	NA	NA
Myc	84.6978	1.02069	0.199921	5.10545	3.30004e-07	6.82597e-06	141.938	101.792	56.6661	14.2336	17869	NM_001177352
Pim3	460.482	1.32062	0.145884	9.05254	1.39685e-19	1.76847e-17	413.668	58.9553	191.904	30.0338	223775	NM_145478
Pkdrej	13.1099	2.48333	0.428186	5.79965	6.64547e-09	1.95582e-07	10.2017	4.15581	2.28632	1.23853	18766	NM_011105
Pnpla3	170.459	-1.35943	0.249098	-5.45743	4.83089e-08	1.20452e-06	71.069	39.9756	237.785	60.2627	116939	NM_054088
Sqle	26.0051	-1.54607	0.255405	-6.05342	1.41805e-09	4.73305e-08	27.3559	26.2683	54.1056	12.634	20775	NM_009270
Wisp1	13.7834	-3.14146	0.419237	-7.49328	6.71745e-14	4.48421e-12	3.23363	2.31268	39.9449	12.41	NA	NA
Zfp41	27.4749	-1.35668	0.306081	-4.43244	9.31743e-06	0.000128726	19.8652	6.84108	43.2778	6.572	22701	NM_001044718
A930003A15Rik	23.9805	-2.25322	0.431545	-5.22129	1.77679e-07	3.97168e-06	10.4947	4.84717	48.7163	14.0128	68162	NR_015488
Apod	1147.58	1.18335	0.175468	6.74397	1.54121e-11	7.16271e-10	1288.83	480.47	601.856	99.2002	11815	NM_001301353
Atp13a3	578.764	1.02936	0.137107	7.50769	6.01789e-14	4.03556e-12	628.611	108.132	350.084	32.7304	224088	NM_001128094
Bdh1	226.848	1.23888	0.207278	5.97693	2.27383e-09	7.25946e-08	193.452	82.4797	69.6307	14.5386	71911	NM_001122683
Casr	226.054	2.25734	0.180707	12.4917	8.2879e-36	5.0715e-33	219.43	75.7754	50.9307	16.5312	12374	NM_013803
Cblb	265.296	1.03956	0.135435	7.67571	1.64502e-14	1.20794e-12	278.456	53.4385	122.893	9.05761	208650	NM_001033238
Cebpd	474.115	2.48581	0.345537	7.19405	6.28952e-13	3.58015e-11	504.391	118.173	120.692	47.5481	12609	NM_007679
Chodl	94.6599	-1.28495	0.174898	-7.34685	2.02935e-13	1.28462e-11	40.8676	23.2775	98.613	15.8539	246048	NM_001362555
Col8a1	89.4589	-1.21738	0.202453	-6.01316	1.81945e-09	5.91159e-08	56.5989	8.8584	136.028	37.0754	12837	NM_007739
Eva1c	5.96515	3.41712	0.656	5.20903	1.89827e-07	4.19849e-06	9.19905	7.4904	1.11392	0.650593	70967	NM_001199210
Fstl1	1172.42	-1.14933	0.156467	-7.34548	2.05015e-13	1.28669e-11	656.233	124.509	1596.66	217.487	14314	NM_008047
Glis2	73.2494	-1.30064	0.253309	-5.13459	2.82761e-07	5.92386e-06	42.6296	8.39629	98.5455	20.2596	83396	NM_031184
Kcnj15	20.4215	3.21035	0.487346	6.58741	4.47555e-11	1.89965e-09	24.4762	13.0503	4.27048	1.99532	16516	NM_001039056
Lrrc58	959.967	1.14974	0.135927	8.45849	2.70867e-17	2.80138e-15	859.442	176.307	423.456	27.9608	320184	NM_177093
Ostn	852.897	3.2829	0.188575	17.409	7.04734e-68	2.58743e-64	329.366	206.695	29.8927	10.0547	239790	NM_198112
Pkp2	51.1383	1.59224	0.276375	5.76114	8.35469e-09	2.40582e-07	39.7285	14.3459	14.2289	6.61763	67451	NM_026163
Prodh	139.242	1.52987	0.210509	7.26747	3.66296e-13	2.16041e-11	112.449	17.6969	39.0389	10.3014	19125	NM_011172
Runx1	69.2567	1.73163	0.266488	6.49796	8.14139e-11	3.32123e-09	96.9751	19.5498	34.9672	13.7903	12394	NM_001111021
Sec14l5	82.1356	-2.12603	0.216456	-9.82199	9.05405e-23	1.74958e-20	29.1253	14.9532	111.81	8.29173	665119	NM_001127725
Slc25a1	423.779	-1.48779	0.326536	-4.55628	5.20678e-06	7.85887e-05	245.151	101.454	927.691	138.791	13358	NM_153150
Tfrc	1009.89	-1.48857	0.220906	-6.73849	1.60036e-11	7.41418e-10	413.99	168.99	1362.51	230.931	22042	NM_001357298
Tiam1	78.1159	-1.09533	0.205737	-5.32396	1.01531e-07	2.38956e-06	40.1419	12.1274	97.6251	10.1917	21844	NM_001145886
Tnk2	383.141	-1.0201	0.147315	-6.92462	4.37152e-12	2.18368e-10	246.645	43.3611	399.031	51.3169	51789	NM_001110147
Trp63	136.139	1.87938	0.194954	9.64015	5.41109e-22	9.46039e-20	147.57	59.2655	41.5673	8.68408	22061	NM_001127259
Vasn	114.93	-1.06162	0.212983	-4.98454	6.21102e-07	1.20337e-05	68.7953	21.067	119.6	22.611	246154	NM_139307
Zdhhc23	15.6316	1.91713	0.426363	4.49647	6.90921e-06	9.87049e-05	17.0831	6.75273	5.44933	3.08476	332175	NM_001007460
Angptl4	225.32	1.94096	0.266126	7.29341	3.02209e-13	1.82644e-11	205.322	78.5242	67.9169	24.1513	57875	NM_020581
Cbs	12.7386	2.60901	0.546247	4.77625	1.78595e-06	3.11132e-05	26.985	32.8089	5.81027	3.52998	12411	NM_001271353
Cdkn1a	517.664	1.39989	0.208534	6.71299	1.90674e-11	8.69639e-10	464.096	117.412	186.175	46.2301	12575	NM_001111099
Col11a2	65.3593	-3.24839	0.343693	-9.45143	3.34217e-21	5.33513e-19	17.6327	8.00863	162.439	81.0081	12815	NM_001317722
Cyp1b1	72.9055	2.43892	0.297819	8.18926	2.62833e-16	2.36808e-14	122.904	55.5988	26.915	11.1167	13078	NM_001364889
Emilin2	196.475	-1.092	0.176548	-6.18529	6.19895e-10	2.18841e-08	121.331	36.4987	247.008	42.5126	246707	NM_001357336
Fam179a	51.0483	-1.04644	0.184996	-5.65654	1.54451e-08	4.25567e-07	28.7763	6.18158	55.035	6.51841	NA	NA
Fkbp5	1173.08	2.27311	0.296554	7.66507	1.78729e-14	1.30588e-12	885.241	67.0013	173.925	71.3013	14229	NM_010220
Igfals	40.7834	-1.28901	0.229142	-5.62536	1.8512e-08	5.01235e-07	19.4545	9.54719	61.1369	13.4722	16005	NM_001364895
Mdga1	105.744	-2.84184	0.234031	-12.143	6.25134e-34	3.27883e-31	33.9559	11.0075	233.658	60.0915	74762	NM_001081160
Pi16	762.595	-1.44713	0.136888	-10.5717	4.03243e-26	1.02104e-23	296.345	79.5869	796.079	88.4098	74116	NM_023734
Rnaset2b	25.529	2.29763	0.463891	4.95295	7.30985e-07	1.39103e-05	45.7224	22.8564	7.86372	9.41473	68195	NM_026611
Sik1	320.498	1.68407	0.33552	5.01927	5.18684e-07	1.02522e-05	401.926	86.2847	142.322	50.7286	17691	NM_010831
Tubb4a	24.4873	-1.44243	0.302582	-4.76706	1.86935e-06	3.22222e-05	13.3305	3.51084	33.569	9.34933	22153	NM_009451
Xdh	1085.72	1.03687	0.161353	6.42609	1.30925e-10	5.16873e-09	948.831	174.381	453.716	55.9018	22436	NM_011723
4833403I15Rik	63.0865	1.75974	0.231201	7.6113	2.71344e-14	1.91585e-12	56.0363	19.1683	20.0552	6.08773	NA	NA
Aqp4	358.017	-2.13975	0.136668	-15.6566	2.99366e-55	5.4956e-52	145.224	42.8869	685.357	69.282	11829	NM_001308641
Arhgap26	163.454	1.33948	0.190642	7.02615	2.1231e-12	1.11357e-10	198.739	85.0548	85.1818	5.83767	71302	NM_001361073
Arsi	24.4561	-2.635	0.432341	-6.09473	1.0962e-09	3.70088e-08	7.58907	3.43096	53.0635	13.5664	545260	NM_001038499
Ctxn3	231.587	1.6565	0.253994	6.52181	6.94621e-11	2.87358e-09	197.042	81.5548	69.03	18.3122	629147	NM_001134697
Cxxc5	184.012	-1.75336	0.173316	-10.1165	4.66779e-24	9.93496e-22	92.6471	21.5129	267.571	21.7312	67393	NM_001357458
Hbegf	107.03	-1.26314	0.214863	-5.87884	4.13164e-09	1.24339e-07	49.9033	13.5627	138.818	24.5278	15200	NM_010415
Megf10	18.8462	-2.2161	0.337862	-6.55917	5.41063e-11	2.25101e-09	7.40661	4.88584	28.0561	6.99096	70417	NM_001001979
Nrep	458.105	-2.53057	0.190514	-13.2828	2.91222e-40	2.37605e-37	138.955	46.1558	711.571	140.174	27528	NM_001109988
Pcdh12	51.8456	-1.88077	0.308533	-6.09584	1.08867e-09	3.68391e-08	23.833	10.2446	70.7655	10.6283	53601	NM_017378
Pcdhgb2	28.1968	1.69963	0.369704	4.59727	4.28072e-06	6.67998e-05	28.4177	8.84075	9.22293	5.99474	93700	NM_033575
Pcdhgb7	27.7308	1.57667	0.343451	4.59067	4.41829e-06	6.8338e-05	27.484	13.3714	9.1212	4.25472	93704	NM_033579
Pdgfrb	523.874	-1.09175	0.162672	-6.71133	1.92856e-11	8.74159e-10	295.166	78.0721	562.896	35.7955	18596	NM_001146268
Ppic	208.757	-1.37306	0.130157	-10.5493	5.1164e-26	1.25232e-23	103.639	36.8879	258.775	36.5471	19038	NM_008908
Sema6a	139.539	-1.03438	0.229144	-4.51412	6.35802e-06	9.24494e-05	85.4364	40.2674	150.097	25.3253	20358	NM_001311097
Ankrd1	202.775	2.32784	0.405344	5.74287	9.30877e-09	2.64427e-07	301.764	126.908	61.7903	40.615	107765	NM_013468
Cd248	257.738	-1.89058	0.208802	-9.05443	1.37288e-19	1.75323e-17	103.459	27.3094	370.339	80.8051	70445	NM_054042
Cdc42ep2	191.712	-1.0322	0.174765	-5.90617	3.50148e-09	1.07804e-07	105.185	31.9476	181.482	20.6091	104252	NM_026772
Dmrt2	64.1968	-1.09501	0.191809	-5.70886	1.13734e-08	3.18758e-07	32.3158	6.52691	72.2428	11.8865	226049	NM_145831
E030003E18Rik	155.439	1.34584	0.214639	6.27026	3.60452e-10	1.34015e-08	114.092	24.5433	48.7823	8.12878	320092	NR_015502
Loxl4	30.1308	-1.58032	0.333386	-4.74021	2.13492e-06	3.62467e-05	17.3454	5.76986	50.8489	11.2108	67573	NM_001164311
Pank1	178.512	1.2853	0.160436	8.01129	1.13514e-15	9.43468e-14	136.598	32.4874	63.1545	10.4197	75735	NM_001114339
Pdzd7	54.7656	-1.88062	0.220643	-8.52333	1.5503e-17	1.66188e-15	22.7266	9.42793	68.8109	14.8215	100503041	NM_001195265
Plekhs1	6.81263	5.89942	1.1728	5.03018	4.90008e-07	9.75102e-06	21.9148	46.8344	0.526665	0.574762	226245	NM_001164263
Ppp1r3c	6615.48	2.17307	0.195277	11.1281	9.15572e-29	2.92306e-26	3339.87	874.372	775.645	167.905	53412	NM_016854
Rab3il1	98.0107	-1.11548	0.171403	-6.50793	7.61911e-11	3.12554e-09	64.0207	23.4725	133.29	13.5902	74760	NM_001347429
Scd2	732.137	-1.25043	0.207313	-6.03158	1.62362e-09	5.29877e-08	541.729	180.746	1257.77	191.034	20250	NM_009128
Slc1a1	60.5698	1.89839	0.230677	8.22965	1.87755e-16	1.76754e-14	66.1173	21.6569	19.4798	3.72364	20510	NM_009199
Wbp1l	1504.42	1.22024	0.144638	8.43654	3.26874e-17	3.288e-15	1187.73	218.962	576.75	98.0427	226178	NM_001177812
Acss2	426.813	-1.37802	0.173133	-7.9593	1.73016e-15	1.38848e-13	206.404	44.0456	613.156	153.255	60525	NM_019811
Actc1	3807.34	-2.43562	0.315349	-7.72358	1.13112e-14	8.51875e-13	1244.24	401.023	6742.17	1493.74	11464	NM_009608
Adamtsl2	18.0258	-2.24385	0.399332	-5.61901	1.9206e-08	5.18492e-07	6.29786	4.05661	25.0507	6.11728	77794	NM_029981
Angptl2	875.011	-1.10788	0.108711	-10.191	2.17476e-24	4.83917e-22	535.086	122.578	1308.65	121.314	26360	NM_011923
Aplnr	104.098	-3.52155	0.478342	-7.36199	1.81184e-13	1.1569e-11	28.4263	22.8946	258.82	65.8376	23796	NM_011784
B230312C02Rik	114.446	-4.26265	0.25836	-16.4989	3.73561e-61	9.14353e-58	15.4775	8.71699	267.5	61.0074	320485	NR_040745
B3galt1	64.7999	1.15871	0.207289	5.58981	2.27322e-08	6.05888e-07	58.0441	15.5101	30.8625	8.38273	26877	NM_001379324
Bcl2l1	252.753	1.47219	0.211392	6.96427	3.30121e-12	1.68339e-10	280.986	29.3065	102.953	15.6647	12048	NM_001289716
C130080G10Rik	16.8297	-5.62608	0.694803	-8.09736	5.6163e-16	4.88053e-14	0.579614	0.645293	46.3395	19.217	100303644	NR_028422
Cat	1585.26	1.05741	0.127239	8.31045	9.5342e-17	9.21179e-15	1280.44	191.211	730.259	65.0183	12359	NM_009804
Cdh4	81.9248	-1.62688	0.325234	-5.00219	5.6684e-07	1.107e-05	31.5413	10.7322	94.6015	25.9148	12561	NM_001316723
Cebpb	437.974	1.37634	0.224752	6.12382	9.13558e-10	3.12739e-08	281.298	100.984	114.426	14.2704	12608	NM_001287738
Cercam	42.0705	-1.93625	0.28918	-6.69567	2.14684e-11	9.6713e-10	18.5633	9.09272	72.5296	11.1788	99151	NM_207298
Chac1	658.187	2.62083	0.448729	5.84055	5.20281e-09	1.54987e-07	718.254	244.054	161.07	96.7304	69065	NM_026929
Col5a1	634.603	-2.3954	0.214802	-11.1517	7.02688e-29	2.29326e-26	249.139	84.804	1215.43	210.578	12831	NM_015734
Cpxm1	71.7564	-1.22577	0.241169	-5.08263	3.72251e-07	7.62377e-06	46.3728	25.9964	108.899	17.158	56264	NM_019696
D630003M21Rik	24.3351	-1.48873	0.335868	-4.43248	9.31554e-06	0.000128726	9.98679	5.19243	25.4853	6.0895	228846	NM_001131021
Edn3	9.51504	-3.05617	0.495843	-6.16358	7.11205e-10	2.49278e-08	2.39523	2.54744	26.2308	5.22109	13616	NM_007903
Ehf	10.2296	4.23413	0.901595	4.69627	2.64959e-06	4.35647e-05	30.8631	51.0148	2.12037	1.41815	13661	NM_007914
Fam78a	168.075	-2.1857	0.21547	-10.1438	3.52957e-24	7.62284e-22	75.3736	19.8332	298.953	50.0954	241303	NM_175511
Fam83d	25.2264	-1.57987	0.346893	-4.55433	5.25516e-06	7.89942e-05	16.2891	7.38256	51.8937	10.694	71878	NM_027975
Fap	104.456	-1.33548	0.12435	-10.7397	6.62802e-27	1.80258e-24	49.8275	8.9952	140.335	9.55708	14089	NM_007986
Fbn1	1175.54	-1.61196	0.260259	-6.19367	5.87808e-10	2.09021e-08	539.879	150.002	1626.4	325.406	14118	NM_007993
Frzb	62.4621	-2.31073	0.242805	-9.51682	1.78555e-21	3.04913e-19	29.1109	5.20072	132.384	36.0704	20378	NM_011356
Gdf5	8.07899	4.63246	0.679814	6.8143	9.47215e-12	4.50188e-10	14.7855	6.9337	0.834576	1.0418	14563	NM_008109
Hdc	17.393	2.79385	0.540816	5.16599	2.39175e-07	5.12029e-06	42.0266	49.0802	7.19014	4.20256	15186	NM_008230
Ier5l	27.2759	-1.48641	0.280521	-5.29875	1.16598e-07	2.69662e-06	19.6394	8.34225	36.1269	5.64911	72500	NM_030244
Klhl23	117.92	-1.37922	0.160332	-8.60232	7.81216e-18	8.69162e-16	61.0477	19.8489	160.26	24.7889	277396	NM_001360394
Lrrc55	3.9052	-4.23262	0.863035	-4.90434	9.37435e-07	1.74268e-05	0.867666	0.354042	10.9338	3.72239	241528	NM_001033346
Mertk	81.9491	1.18138	0.215596	5.47959	4.26315e-08	1.07946e-06	114.872	36.6508	51.3855	8.17052	17289	NM_008587
Nkx2-2as	8.75961	6.37103	1.06225	5.9977	2.00137e-09	6.44293e-08	9.74637	4.90964	0.0727821	0.162746	NA	NA
Nr6a1	55.821	1.12536	0.244791	4.59721	4.28186e-06	6.67998e-05	50.2499	15.4864	26.7917	9.69216	14536	NM_001159548
Pck1	1327.35	2.29812	0.432463	5.31403	1.07226e-07	2.49955e-06	1548.68	674.377	451.853	167.566	18534	NM_011044
Pde1a	53.1764	1.05464	0.229856	4.58825	4.46987e-06	6.88819e-05	53.6018	32.1287	34.9518	6.11752	18573	NM_001009978
Pkp4	440.032	1.49077	0.10743	13.8767	8.76982e-44	9.9072e-41	430.085	110.986	173.007	15.4146	227937	NM_001362990
Ppapdc3	963.561	-1.52253	0.123725	-12.3057	8.43653e-35	4.76534e-32	442.166	157.341	1145.34	164.269	NA	NA
Ptges	80.3532	-1.2623	0.249363	-5.06211	4.14633e-07	8.42227e-06	42.2584	17.2759	131.08	9.42015	64292	NM_022415
Ptpla	400.658	-1.84985	0.128996	-14.3404	1.22383e-46	1.79732e-43	146.907	41.1785	548.61	44.3411	NA	NA
Scand1	138.487	1.59597	0.320626	4.97767	6.43555e-07	1.24032e-05	189.61	99.3921	60.2144	34.7875	19018	NM_020255
Sdc4	386.505	1.08044	0.173749	6.2184	5.02242e-10	1.79463e-08	328.218	50.2692	189.997	16.8314	20971	NM_011521
Snhg11	31.0582	2.1693	0.460005	4.71581	2.40749e-06	3.99959e-05	22.6455	15.5397	5.47676	2.62751	319317	NM_175692
Spata5l1	39.6945	1.23999	0.247561	5.00882	5.4766e-07	1.07382e-05	42.0464	8.996	17.989	6.86351	214616	NM_001033256
St8sia6	19.0168	1.29673	0.291382	4.45029	8.57529e-06	0.000119712	61.5017	78.7523	12.0211	3.06273	241230	NM_145838
Agxt2l1	3.36659	5.34421	1.20567	4.43256	9.31198e-06	0.000128726	5.0524	4.465	0.0710574	0.158889	NA	NA
Amy1	604.412	1.60321	0.128181	12.5074	6.80067e-36	4.34237e-33	460.915	80.7104	165.067	12.9158	11722	NM_001110505
Bmpr1b	70.8695	1.36686	0.242403	5.63879	1.71247e-08	4.68329e-07	65.042	16.2881	29.997	11.8292	12167	NM_001277216
Casq2	477.458	-1.15305	0.163295	-7.06113	1.65152e-12	8.8519e-11	323.443	96.8682	654.758	28.5147	12373	NM_001355663
Ccrn4l	278.291	1.1888	0.222298	5.34781	8.90262e-08	2.11903e-06	217.53	40.664	106.014	23.5688	NA	NA
Chia	7.15963	4.72183	0.924377	5.10812	3.25386e-07	6.73994e-06	6.27509	2.00688	0.216621	0.324549	NA	NA
Col11a1	60.2939	-4.07392	0.346368	-11.7618	6.1403e-32	2.65225e-29	8.42363	6.35264	187.511	78.4342	12814	NM_007729
Ctsk	103.787	-2.01085	0.284695	-7.06319	1.62721e-12	8.75354e-11	43.6025	11.8441	203.376	83.2209	13038	NM_007802
Cyr61	451.565	1.01991	0.171929	5.93214	2.99019e-09	9.40341e-08	406.368	139.586	208.161	34.375	NA	NA
Dpyd	48.3096	1.47586	0.27284	5.40924	6.32911e-08	1.54916e-06	56.5542	27.4586	27.4084	5.72035	99586	NM_170778
Fabp4	5123.06	1.0484	0.179808	5.83065	5.52103e-09	1.63802e-07	3695.09	615.003	2448.12	196.471	11770	NM_024406
Fam212b	84.285	-1.08195	0.23362	-4.63125	3.63466e-06	5.7769e-05	51.2559	11.5598	110.73	8.67615	NA	NA
Foxo1	806.896	1.94023	0.278469	6.96748	3.22661e-12	1.65685e-10	809.283	121.316	228.408	17.0217	56458	NM_019739
Gm5105	47.4298	-1.92482	0.312367	-6.16204	7.18152e-10	2.51114e-08	21.7369	8.04988	77.3153	8.46767	329763	NM_177860
Gpsm2	25.6852	-1.23849	0.265577	-4.66339	3.11045e-06	5.01427e-05	17.8059	9.88084	46.9205	7.09922	76123	NM_029522
Hmgcs2	68.4749	2.25213	0.349737	6.43949	1.19878e-10	4.78406e-09	97.4651	54.8893	24.5479	13.405	15360	NM_008256
Igsf10	68.2959	-1.595	0.311896	-5.11387	3.15619e-07	6.55613e-06	39.3888	18.9114	137.234	20.364	242050	NM_001162884
Igsf3	58.1653	-1.22788	0.242576	-5.06182	4.1527e-07	8.42262e-06	34.5557	17.3468	87.1794	13.6708	78908	NM_207205
Il6ra	149.97	1.10192	0.213967	5.14993	2.60586e-07	5.52233e-06	167.854	43.9364	80.1969	23.7445	16194	NM_001310676
Kcnd3	4.51967	3.3299	0.743589	4.47815	7.52927e-06	0.00010622	7.68237	8.76418	0.969307	0.607503	56543	NM_001039347
Lrat	7.52005	3.49903	0.614068	5.69811	1.21145e-08	3.38884e-07	12.3478	8.49155	1.18536	0.608808	79235	NM_023624
Mlf1	1341.96	-1.58948	0.160777	-9.88625	4.77587e-23	1.00198e-20	451.084	171.249	1380.73	114.25	17349	NM_001039543
Olfml3	123.402	-1.16401	0.225781	-5.15548	2.52979e-07	5.38441e-06	77.8703	29.2469	192.731	23.3478	99543	NM_133859
Pde7a	1210.17	1.43431	0.113248	12.6652	9.22022e-37	6.15492e-34	785.242	179.419	292.887	38.0059	18583	NM_001122759
Postn	506.263	-1.82828	0.366922	-4.98274	6.26888e-07	1.21255e-05	305.684	194.324	1239.53	301.918	50706	NM_001198765
Ptger3	36.6057	-1.77238	0.254556	-6.96265	3.33936e-12	1.6911e-10	15.2842	8.33129	63.0949	6.74995	19218	NM_001359745
Ptgfr	37.0437	1.02511	0.214942	4.76922	1.84942e-06	3.20082e-05	31.1308	13.1402	19.9359	3.00091	19220	NM_008966
Ptx3	44.9664	-1.58232	0.232667	-6.80078	1.04051e-11	4.89776e-10	22.6473	4.82464	73.0238	16.2048	19288	NM_008987
Rhbg	2.71985	5.19368	1.12074	4.63416	3.5839e-06	5.72099e-05	5.54403	3.71285	0.149789	0.205555	58176	NM_021375
Rorc	553.574	1.24524	0.159629	7.80086	6.14875e-15	4.75266e-13	463.072	153.677	207.76	31.7079	19885	NM_001293734
Sema6c	733.913	-1.1702	0.146415	-7.99233	1.32412e-15	1.08033e-13	405.975	167.211	883.388	152.086	20360	NM_001272024
Sfrp2	94.36	-1.53063	0.22718	-6.73753	1.61098e-11	7.43989e-10	51.9138	30.4028	175.313	21.487	20319	NM_009144
St6galnac5	16.2942	2.31899	0.389596	5.95229	2.64424e-09	8.36926e-08	16.2456	8.82108	4.59034	1.61157	26938	NM_012028
Sypl2	3313.52	-1.48216	0.111993	-13.2344	5.55295e-40	4.29214e-37	1487.84	477.909	4075.78	569.093	17306	NM_008596
Tdrkh	48.7357	1.70473	0.246264	6.92237	4.44137e-12	2.21105e-10	48.0857	8.25661	15.3769	7.48898	72634	NM_001357711
Thbs3	95.4185	-1.10493	0.233352	-4.73504	2.19015e-06	3.70133e-05	55.0233	25.533	134.154	23.9856	21827	NM_013691
Acer2	125.532	2.00939	0.229654	8.74961	2.14097e-18	2.57723e-16	161.435	85.7441	46.8585	9.39575	230379	NM_001290541
Asap3	54.1622	-1.73145	0.222419	-7.78463	6.9915e-15	5.35232e-13	25.4626	5.78649	79.6197	13.6068	230837	NM_001008232
Ccdc28b	117.004	-1.04197	0.183616	-5.67474	1.38897e-08	3.84152e-07	73.7159	34.382	119.51	14.2811	66264	NM_025455
Cited4	56.0199	-1.94298	0.224105	-8.66995	4.32294e-18	4.92144e-16	27.0627	9.43665	120.068	25.9172	56222	NM_019563
Cnksr1	519.595	1.41325	0.151231	9.34494	9.19387e-21	1.40647e-18	386.737	100.93	141.698	32.4552	194231	NM_001081047
Col15a1	527.351	-1.85212	0.318685	-5.81174	6.18276e-09	1.82329e-07	255.797	129.806	924.041	208.667	12819	NM_009928
Col16a1	87.6061	-1.80074	0.260854	-6.90327	5.08201e-12	2.50451e-10	50.2185	16.3711	166.145	37.3158	107581	NM_028266
Col8a2	19.7715	-1.91567	0.366167	-5.23169	1.67965e-07	3.79497e-06	8.16107	6.12331	38.5195	5.45408	329941	NM_199473
Eno1	54.4315	-1.23925	0.219056	-5.65721	1.53856e-08	4.24723e-07	13.699	5.54956	31.0095	1.72676	13806	NM_001379127
Fam46b	14.0195	2.77865	0.471209	5.89686	3.70485e-09	1.12883e-07	21.3862	10.5869	3.44991	1.75496	NA	NA
Foxo6	43.3085	-2.77974	0.358952	-7.74405	9.63017e-15	7.29014e-13	13.1523	7.78432	104.66	32.0657	329934	NM_194060
Frem1	11.9701	-3.11602	0.543686	-5.73129	9.96687e-09	2.80947e-07	4.06921	2.28085	28.079	10.4177	329872	NM_001198811
Gabrr1	12.3851	2.45987	0.515544	4.7714	1.8295e-06	3.18204e-05	14.8265	8.01376	2.39974	2.13378	14408	NM_008075
Gpr153	82.9224	-1.11932	0.161616	-6.92581	4.33501e-12	2.17283e-10	53.5061	15.1065	128.361	18.9269	100129	NM_001374784
Heyl	117.26	-1.57532	0.207884	-7.57789	3.51222e-14	2.42162e-12	59.3437	38.9853	133.85	32.4135	56198	NM_013905
Hook1	318.91	1.11353	0.104839	10.6213	2.37142e-26	6.21904e-24	246.114	30.669	114.228	13.9087	77963	NM_030014
Lrrc38	203.469	-1.75804	0.125216	-14.04	8.86731e-45	1.08521e-41	91.2362	37.1264	269.002	34.3109	242735	NM_001162983
Map3k6	186.523	2.34633	0.240904	9.73965	2.0425e-22	3.74951e-20	205.499	38.9612	42.368	12.5336	53608	NM_016693
Mfap2	36.7883	-2.60862	0.32098	-8.12706	4.39838e-16	3.89124e-14	13.6642	1.56804	84.7351	21.8024	17150	NM_001161799
Musk	214.331	1.41706	0.167398	8.46522	2.55671e-17	2.66297e-15	206.131	74.0948	74.4292	10.0752	18198	NM_001037127
Nr4a3	64.8883	2.72892	0.495296	5.50967	3.59505e-08	9.21412e-07	62.962	35.8122	17.743	9.54987	18124	NM_001307989
Paqr7	65.5355	-1.14583	0.176296	-6.49946	8.06075e-11	3.2975e-09	38.7776	5.65757	84.9982	8.35009	71904	NM_001285845
Pax7	18.4862	-3.39521	0.406561	-8.35103	6.76702e-17	6.58149e-15	4.51195	4.10991	33.4946	8.0884	18509	NM_011039
Per3	369.165	-1.14888	0.156724	-7.33063	2.29082e-13	1.414e-11	196.393	58.8014	390.866	20.7892	18628	NM_001289877
Pgd	397.955	-1.09521	0.174253	-6.28516	3.27519e-10	1.23017e-08	255.783	85.5908	552.196	112.684	110208	NM_001081274
Pla2g5	50.5611	2.36476	0.25448	9.29251	1.50686e-20	2.21297e-18	33.4286	13.509	7.57486	2.59775	18784	NM_001122954
Pnrc1	906.278	1.26682	0.137519	9.21197	3.20199e-20	4.47851e-18	739.472	172.09	322.86	34.7177	108767	NM_001033225
Prkcz	38.3765	2.50065	0.264178	9.46579	2.9135e-21	4.75418e-19	53.0021	10.4154	8.87813	2.82807	18762	NM_001039079
Ptpru	20.6993	2.077	0.461529	4.50026	6.78714e-06	9.7435e-05	21.7231	18.5084	5.6237	4.23156	19273	NM_001083119
Rbp7	42.5125	3.08527	0.352669	8.74834	2.16509e-18	2.58508e-16	55.6131	18.403	10.0958	5.19174	63954	NM_022020
Slc25a34	178.885	1.3362	0.195554	6.83291	8.32099e-12	3.99353e-10	119.931	59.1999	37.4304	7.43565	384071	NM_001013780
Slc2a5	7.80201	-3.91529	0.694697	-5.63596	1.74081e-08	4.74315e-07	0.814134	1.01971	26.9453	11.7964	56485	NM_019741
Tinagl1	458.358	1.05996	0.145558	7.28206	3.28762e-13	1.97069e-11	483.343	84.0837	271.863	14.7018	94242	NM_001168333
Tlr4	87.8046	1.0105	0.189167	5.34181	9.20247e-08	2.18332e-06	100.337	20.3143	55.6552	10.4514	21898	NM_021297
Tnc	115.149	-1.61057	0.290189	-5.55005	2.85585e-08	7.52981e-07	70.314	27.7438	238.598	69.3702	21923	NM_001369211
Trim63	5029.39	1.77202	0.187105	9.47073	2.77883e-21	4.6375e-19	3141.99	894.251	1094.03	146.263	433766	NM_001039048
Trp53inp1	315.92	1.17017	0.196363	5.95924	2.5341e-09	8.07283e-08	416.834	237.158	158.205	16.4413	60599	NM_001199105
0610040J01Rik	92.4862	1.23745	0.184907	6.69226	2.19757e-11	9.86958e-10	71.0213	27.6282	31.3982	5.84317	76261	NM_029554
2410137F16Rik	39.8654	2.96352	0.324201	9.14102	6.18663e-20	8.49129e-18	45.1337	13.3947	5.774	1.98213	NA	NA
A830010M20Rik	75.6893	-1.17566	0.218427	-5.38241	7.34966e-08	1.78704e-06	52.5489	12.1859	105.886	12.5704	NA	NA
Actr3b	38.7683	3.38556	0.418781	8.08432	6.25107e-16	5.40019e-14	25.1815	7.90851	2.56758	1.80794	242894	NM_001004365
Adap1	27.3035	-1.47572	0.221684	-6.65686	2.7973e-11	1.23367e-09	25.2053	22.7454	50.1082	6.94499	231821	NM_172723
Cldn3	13.2636	3.64438	0.735625	4.95412	7.26588e-07	1.3876e-05	36.3955	63.6437	3.81826	2.52659	12739	NM_009902
Col26a1	9.31049	-4.24895	0.604466	-7.02926	2.07632e-12	1.09293e-10	1.49208	0.941213	26.3122	6.33794	140709	NM_001346699
Cyp51	75.6332	-1.19336	0.201756	-5.91485	3.32182e-09	1.0292e-07	67.791	54.8645	119.221	18.5959	13121	NM_020010
Eln	352.792	-1.50789	0.173339	-8.69905	3.34671e-18	3.83983e-16	177.93	36.3594	549.867	101.422	13717	NM_007925
Fam114a1	120.311	-1.04455	0.216352	-4.828	1.3791e-06	2.46693e-05	77.077	21.9331	172.057	37.9273	68303	NM_026667
Fbxo21	263.159	1.15659	0.183053	6.31835	2.64363e-10	1.00842e-08	250.498	76.31	136.585	26.7881	231670	NM_001346588
Fgfr3	50.813	1.4993	0.300668	4.98657	6.14622e-07	1.19238e-05	49.1741	11.5665	20.7308	3.48258	14184	NM_001163215
Gbp10	31.6056	4.04354	0.542451	7.4542	9.04142e-14	5.90144e-12	60.4955	62.8318	3.96949	2.50034	626578	NM_001039646
Gbp6	78.2913	1.87279	0.37612	4.97922	6.3842e-07	1.23204e-05	133.209	112.357	35.2986	9.65306	100702	NM_194336
Kcnh2	21.6438	-2.16793	0.442488	-4.89941	9.61252e-07	1.78394e-05	8.08308	6.12242	42.7249	10.4952	16511	NM_001294162
Lgi2	24.843	-1.4191	0.272726	-5.20338	1.95696e-07	4.30883e-06	11.2958	3.11561	34.0298	7.40861	246316	NM_001310604
Lrrc17	39.0659	-1.96	0.387231	-5.06158	4.15797e-07	8.42262e-06	16.7896	15.3344	78.6993	14.7446	74511	NM_028977
Mafk	267.057	1.02782	0.147539	6.96642	3.25109e-12	1.66361e-10	244.542	32.4011	133.242	11.2801	17135	NM_010757
Mfsd7a	19.4024	1.31456	0.28197	4.66206	3.13058e-06	5.04119e-05	22.452	3.06277	10.3296	3.09981	243197	NM_001359977
Pcolce	545.074	-1.1622	0.158542	-7.33058	2.29151e-13	1.414e-11	280.419	75.4415	682.231	95.8707	18542	NM_008788
Pdgfa	106.897	-1.23355	0.149974	-8.2251	1.95031e-16	1.8128e-14	51.3766	26.4646	100.206	9.84491	18590	NM_001363271
Ppargc1a	420.857	1.31427	0.212732	6.17803	6.49076e-10	2.28046e-08	391.737	212.993	216.292	24.483	19017	NM_008904
Scarb1	359.652	-1.13443	0.155944	-7.27459	3.47474e-13	2.06599e-11	224.423	43.5558	453.992	36.8927	20778	NM_001205082
Shh	2.30101	5.7552	1.18614	4.85206	1.22187e-06	2.21536e-05	3.34701	1.81149	0	0	20423	NM_009170
Shroom3	25.8466	1.89162	0.394224	4.79835	1.59981e-06	2.83071e-05	39.6336	23.0307	12.3255	6.71559	27428	NM_001077595
Slc10a6	46.4177	2.65802	0.452403	5.87533	4.21992e-09	1.26736e-07	59.03	17.382	9.71521	1.84474	75750	NM_029415
Tbx3	84.2442	1.02349	0.222161	4.60699	4.08549e-06	6.39653e-05	86.9998	25.5555	47.1528	14.3531	21386	NM_011535
Tcf23	10.1792	4.90828	0.897524	5.4687	4.5336e-08	1.14008e-06	27.8385	43.8292	1.07852	1.01569	69852	NM_053085
Tmem132b	44.5211	4.83357	0.489679	9.8709	5.5661e-23	1.10465e-20	32.7679	15.8949	1.0471	0.630909	208151	NM_001190352
Uchl1	44.0511	1.16009	0.212927	5.44832	5.08468e-08	1.26351e-06	43.6386	8.07599	20.5152	1.22273	22223	NM_011670
8430408G22Rik	305.091	3.72164	0.329646	11.2898	1.47352e-29	5.41004e-27	411.613	152.929	41.4736	13.8197	NA	NA
Bhlhe41	377.579	-1.30949	0.175123	-7.47756	7.57146e-14	5.00876e-12	230.579	66.2486	469.832	81.7053	79362	NM_001271768
Cacna2d4	7.45409	-3.10178	0.583371	-5.31699	1.05499e-07	2.47106e-06	2.01091	0.935617	12.9448	2.52454	319734	NM_001033382
Cadps2	19.4622	1.72532	0.320781	5.37851	7.51063e-08	1.82316e-06	24.0996	11.7535	10.1226	3.80026	320405	NM_001252105
Cav3	293.068	-1.53329	0.112775	-13.596	4.2288e-42	4.14028e-39	130.799	34.676	373.517	21.0686	12391	NM_007617
Cidec	1757.09	1.74855	0.352009	4.96734	6.7879e-07	1.3014e-05	1665.31	666.234	638.124	120.102	14311	NM_001301295
Col1a2	3394.62	-3.32772	0.206174	-16.1403	1.3282e-58	2.78656e-55	806.783	242.021	8077.5	1852.88	12843	NM_007743
Fam13a	377.918	1.43875	0.190444	7.55474	4.19689e-14	2.86677e-12	409.842	161.095	196.261	17.5822	58909	NM_153574
Gabarapl1	769.175	1.25736	0.116018	10.8377	2.28202e-27	6.57133e-25	631.513	100.735	302.514	28.7013	57436	NM_020590
Gadd45a	445.106	2.16254	0.246032	8.78968	1.4999e-18	1.83563e-16	510.837	155.487	134.174	10.6995	13197	NM_007836
Gata2	106.295	1.10998	0.24225	4.58195	4.60661e-06	7.0487e-05	118.786	51.1742	56.9045	17.6314	14461	NM_001355253
Gpnmb	113.317	1.62985	0.222681	7.31923	2.49398e-13	1.52611e-11	164.654	59.8058	52.9433	10.4035	93695	NM_053110
Grip2	40.6689	-1.45254	0.279031	-5.20566	1.93307e-07	4.26262e-06	16.3879	6.30269	48.2192	9.58663	243547	NM_001033353
Il17re	7.28695	3.1968	0.604083	5.29199	1.20991e-07	2.78071e-06	11.2721	10.3612	1.51251	0.508826	57890	NM_001034029
Inmt	587.597	1.29691	0.214481	6.04672	1.47827e-09	4.90065e-08	367.559	98.2646	172.454	64.9745	21743	NM_009349
Kcna1	138.589	1.62163	0.22319	7.26569	3.71134e-13	2.18019e-11	150.953	64.993	59.4891	17.3513	16485	NM_010595
Kcna5	161.997	1.01589	0.186009	5.46153	4.7205e-08	1.18101e-06	156.241	32.4577	76.7371	17.7983	16493	NM_145983
Kcp	27.0264	-1.63091	0.353027	-4.6198	3.84105e-06	6.06556e-05	14.1069	7.67686	36.1012	14.0564	333088	NM_001029985
Klf15	703.897	1.09071	0.151961	7.17754	7.09785e-13	4.00919e-11	531.815	105.859	270.003	51.7916	66277	NM_001355668
Lmod3	851.952	-1.04137	0.125837	-8.27554	1.27874e-16	1.22742e-14	497.891	141.048	1088.62	76.3591	320502	NM_001081157
Lrtm2	12.3149	-3.10925	0.456086	-6.81725	9.27969e-12	4.43914e-10	4.20202	3.09139	23.5199	5.71524	211187	NM_001172207
Mest	50.083	-2.03549	0.343455	-5.92652	3.09429e-09	9.66867e-08	20.3189	7.92072	90.1575	29.2713	17294	NM_001252292
Pdk4	12752.4	5.25331	0.20613	25.4854	2.86386e-143	4.20586e-139	8904.46	2903.1	278.033	106.785	27273	NM_013743
Ret	65.4289	-1.53724	0.301548	-5.09785	3.43534e-07	7.07594e-06	31.4604	14.8076	116.775	22.1477	19713	NM_001080780
Slc41a3	744.936	-1.12915	0.121965	-9.25798	2.0833e-20	2.99954e-18	317.941	105.073	699.884	98.8964	71699	NM_001037493
Timp4	547.362	1.58528	0.167413	9.46929	2.81751e-21	4.64921e-19	423.336	67.0548	144.756	43.8453	110595	NM_001356406
Tmem140	75.3806	1.66678	0.233917	7.12554	1.03675e-12	5.66011e-11	55.8806	17.2377	19.8926	4.78679	68487	NM_001368365
Tspan11	19.7467	-1.34486	0.26962	-4.98798	6.1014e-07	1.18525e-05	12.6576	3.54781	31.4509	5.36925	68498	NM_026743
Acsm3	32.9357	2.97794	0.514349	5.78972	7.05032e-09	2.05847e-07	61.2267	40.1201	10.5709	5.94154	20216	NM_016870
Acsm5	13.0018	3.40055	0.535505	6.35016	2.15086e-10	8.269e-09	20.6487	12.9485	2.7921	2.07772	272428	NM_178758
Adm	43.8583	1.04304	0.22697	4.59549	4.31725e-06	6.71644e-05	54.6311	30.7878	26.8619	2.98521	11535	NM_009627
Ampd3	212.955	1.20847	0.147058	8.2176	2.07608e-16	1.90558e-14	247.588	54.3528	112.19	4.54357	11717	NM_001276301
Ano5	2112.28	-1.12505	0.123406	-9.11664	7.749e-20	1.03456e-17	917.097	262.076	2067.4	188.244	233246	NM_001271879
Beta-s	2268.07	1.39486	0.288824	4.82944	1.36916e-06	2.45512e-05	1893.13	748.226	922.75	212.964	NA	NA
Ccdc8	18.9002	-1.79592	0.389213	-4.61423	3.94555e-06	6.19725e-05	9.50866	3.97866	30.9394	4.29815	434130	NM_001101535
Chrdl2	7.27402	-3.20217	0.622563	-5.14352	2.69633e-07	5.6894e-06	1.77184	1.37683	15.0584	4.61451	69121	NM_001291320
Clec11a	25.4711	-1.57126	0.272422	-5.76774	8.03398e-09	2.31802e-07	14.8112	5.97967	50.1883	11.7482	20256	NM_009131
Cyb5r2	32.4192	1.64542	0.312723	5.26158	1.42824e-07	3.26208e-06	29.9575	10.7004	10.1785	4.48701	320635	NM_001205227
Cyp2f2	184.959	3.51106	0.290161	12.1004	1.05097e-33	5.32226e-31	290.529	122.149	32.1221	11.0911	13107	NM_007817
Dbp	580.233	-1.59531	0.143863	-11.0891	1.41755e-28	4.3371e-26	292.394	86.2197	754.462	80.9365	13170	NM_016974
Dchs1	98.8846	-1.10089	0.23092	-4.76739	1.86631e-06	3.22076e-05	65.6819	26.0434	146.216	28.1088	233651	NM_001162943
Dgat2	1113.97	-1.21499	0.266107	-4.5658	4.97587e-06	7.53356e-05	566.434	118.764	1543.19	392.796	67800	NM_026384
Dkk3	223.256	1.86973	0.246064	7.59854	2.9948e-14	2.09436e-12	172.923	41.2597	47.9028	14.7351	50781	NM_001360257
Fam174b	27.945	1.31689	0.295178	4.46134	8.14478e-06	0.000114245	37.5511	12.7377	16.1278	3.70854	100038347	NM_001162532
H19	8263.61	-1.59327	0.13227	-12.0456	2.04636e-33	1.00176e-30	4006.75	1058.26	11738.3	1690.68	14955	NR_001592
Hbb-b1	18.8206	3.35477	0.605983	5.53608	3.09314e-08	8.05423e-07	10.4549	7.20927	1.51009	0.595634	15129	NM_001278161
Hif3a	16.2824	2.53106	0.50095	5.05252	4.3601e-07	8.78359e-06	18.5458	3.87525	3.06926	2.00864	53417	NM_001162950
Mrgprf	30.0989	-1.77946	0.294688	-6.03843	1.55619e-09	5.1014e-08	14.8592	4.4517	47.6667	6.63547	211577	NM_145379
Myh14	429.234	1.09728	0.127424	8.61122	7.22887e-18	8.10407e-16	415.326	79.5635	196.269	21.6537	71960	NM_001271538
Ndn	92.4859	-1.18211	0.193381	-6.11286	9.78582e-10	3.3422e-08	48.6315	11.8643	124.565	21.9455	17984	NM_010882
Nox4	50.2872	1.51762	0.228442	6.64335	3.06633e-11	1.34424e-09	54.7474	31.001	26.2898	5.54871	50490	NM_001285833
Ppfibp2	138.837	1.35819	0.173419	7.83179	4.80958e-15	3.7571e-13	147.231	38.7125	62.7123	11.0079	19024	NM_001163557
Ppp1r13l	55.6955	1.13696	0.235215	4.83369	1.34025e-06	2.40623e-05	56.368	18.4331	22.9211	6.7506	333654	NM_001010836
Rcn3	222.642	-1.12273	0.169123	-6.63852	3.16839e-11	1.38485e-09	148.002	40.1561	320.964	38.0836	52377	NM_001355045
Rgma	343.817	-1.18853	0.147464	-8.05979	7.64242e-16	6.52538e-14	207.663	56.3508	467.332	48.6709	244058	NM_177740
Rhpn2	77.4628	2.35105	0.26532	8.86119	7.91647e-19	9.85266e-17	88.8838	39.6619	19.9539	6.84859	52428	NM_027897
Ric3	49.0642	1.6662	0.233139	7.14678	8.88368e-13	4.93298e-11	48.2521	12.3088	16.4336	5.24146	320360	NM_001038624
Sbk1	220.766	-1.2892	0.181898	-7.08748	1.3658e-12	7.37434e-11	176.232	54.7615	325.078	27.1989	104175	NM_001360811
Serpinh1	1122.69	-1.55573	0.14617	-10.6433	1.87335e-26	5.0022e-24	531.329	156.393	1672.55	210.782	12406	NM_001111043
Ssc5d	137.933	-2.26392	0.209185	-10.8225	2.69206e-27	7.60299e-25	49.8452	20.072	249.452	33.6128	269855	NM_173008
Sytl2	44.5482	-1.11101	0.242477	-4.5819	4.60762e-06	7.0487e-05	25.9841	7.27553	62.4499	20.0019	83671	NM_001040085
Tph1	13.2277	3.06549	0.544866	5.62614	1.8429e-08	5.00275e-07	16.1668	15.1764	2.84255	1.64538	21990	NM_001136084
Ucp3	2792.06	3.38316	0.167597	20.1863	1.29213e-90	9.48808e-87	1906.29	546.106	191.995	61.0477	22229	NM_009464
Arrdc2	1475.29	2.78424	0.341924	8.14285	3.86069e-16	3.43625e-14	948.237	327.428	129.598	65.4228	70807	NM_027560
Ces1d	1104.68	1.33872	0.16491	8.11787	4.74444e-16	4.17226e-14	797.332	179.656	410.993	43.6918	104158	NM_053200
Cilp2	51.6521	-3.50994	0.358185	-9.79924	1.13441e-22	2.16363e-20	9.51368	8.79185	133.985	32.2397	68709	NM_026818
Col4a1	2581.69	-1.40334	0.160858	-8.7241	2.68301e-18	3.12719e-16	1337.45	315.239	3273.36	517.748	12826	NM_009931
Col4a2	1869.46	-1.28414	0.174814	-7.34573	2.04638e-13	1.28669e-11	1036.75	296.429	2411.87	430.994	12827	NM_009932
Cpne2	156.332	1.80082	0.206052	8.73963	2.33866e-18	2.76981e-16	204.992	55.7529	59.3916	8.60493	234577	NM_153507
Cx3cl1	37.716	1.67802	0.309207	5.42685	5.73586e-08	1.41575e-06	54.3072	17.991	17.8239	3.20642	20312	NM_009142
Dok4	61.3587	-1.01458	0.183412	-5.5317	3.17137e-08	8.21425e-07	34.0411	6.372	76.36	10.6558	114255	NM_053246
Gpr56	460.012	1.26439	0.149218	8.47347	2.38186e-17	2.49857e-15	468.25	101.697	198.035	14.8276	NA	NA
Has3	32.3758	-2.81962	0.300053	-9.39708	5.60961e-21	8.76413e-19	9.46729	5.01272	60.0541	11.3213	15118	NM_001331048
Hsf4	69.8342	1.00814	0.214755	4.69438	2.67415e-06	4.38799e-05	62.4147	17.9849	32.649	3.37956	26386	NM_001256042
Kcng4	151.56	-1.45725	0.245828	-5.92792	3.06804e-09	9.60709e-08	65.341	37.5883	171.669	50.0821	66733	NM_001357210
Lphn1	209.126	-1.13564	0.175077	-6.48651	8.78454e-11	3.56381e-09	128.263	51.1241	236.654	31.485	NA	NA
Mmp2	769.704	-1.84598	0.137134	-13.4611	2.64835e-41	2.28786e-38	337.795	78.7954	1286.15	143.55	17390	NM_008610
Mt1	532.398	2.09293	0.318625	6.56862	5.07843e-11	2.13091e-09	449.921	88.5029	117.499	19.4553	17748	NM_013602
Mt2	392.168	3.00369	0.307008	9.78375	1.32217e-22	2.4579e-20	373.635	123.884	53.5147	9.01125	17750	NM_008630
Mvd	50.9984	-1.03723	0.191556	-5.41475	6.13736e-08	1.50724e-06	35.8215	11.4859	57.35	9.72539	192156	NM_138656
Neto2	43.9366	2.44987	0.325287	7.53141	5.01969e-14	3.3972e-12	32.1701	12.2305	7.00521	2.95256	74513	NM_001081324
Npy1r	59.2385	1.33191	0.292355	4.5558	5.21877e-06	7.86888e-05	62.0811	20.2963	27.228	12.9802	18166	NM_001358955
Nqo1	195.069	1.23332	0.158022	7.80473	5.96308e-15	4.63354e-13	158.53	51.1825	70.6985	9.91078	18104	NM_008706
Pdgfrl	30.3254	-2.66414	0.374419	-7.1154	1.11591e-12	6.0473e-11	9.24935	6.03933	58.8912	17.8037	68797	NM_026840
Ppp1r3b	36.9498	-2.17756	0.434214	-5.01494	5.30509e-07	1.04438e-05	18.062	15.0808	86.2278	34.8521	244416	NM_001364450
Rab20	13.3121	2.00827	0.428887	4.68251	2.83383e-06	4.60882e-05	15.7089	5.53291	4.32768	2.56432	19332	NM_011227
Rasd2	631.691	2.14625	0.191033	11.235	2.74559e-29	9.60042e-27	430.216	165.954	96.8603	21.958	75141	NM_029182
Rhou	326.325	1.06873	0.149437	7.15174	8.56839e-13	4.78461e-11	237.548	65.8719	127.246	24.0236	69581	NM_133955
Rnf122	70.5937	-1.3248	0.191452	-6.91972	4.52552e-12	2.24533e-10	38.7742	12.3845	70.6244	8.26713	68867	NM_001368373
Sorbs2	722.789	1.32456	0.15069	8.78998	1.49591e-18	1.83563e-16	518.564	170.136	211.16	28.8679	234214	NM_001205219
Tbc1d9	30.9822	1.2343	0.255342	4.8339	1.33886e-06	2.40623e-05	90.8702	110.148	21.7722	5.6711	71310	NM_001111304
1600029D21Rik	20.7783	3.89784	0.855696	4.55517	5.23436e-06	7.87684e-05	60.6264	118.449	5.21434	1.84673	NA	NA
6430571L13Rik	271.302	-1.91086	0.18307	-10.4379	1.66456e-25	4.00751e-23	110.969	39.8241	374.921	84.1171	235599	NM_175486
AW551984	20.1208	-2.24313	0.358458	-6.25772	3.90644e-10	1.4371e-08	9.1501	4.97282	48.112	9.33421	244810	NM_001199556
Acvr2b	53.7193	-1.17899	0.238838	-4.93635	7.95974e-07	1.49868e-05	22.7691	5.65115	51.3112	9.61893	11481	NM_001313757
Adamts8	17.3346	-1.91352	0.310566	-6.16139	7.21092e-10	2.51543e-08	9.06154	3.81532	40.0494	13.7882	30806	NM_001326292
Amigo3	27.4227	-2.0402	0.334473	-6.09974	1.06239e-09	3.61163e-08	14.4991	5.66635	38.1113	6.57308	320844	NM_177275
Cd276	26.0513	-1.62771	0.344959	-4.71855	2.37532e-06	3.95509e-05	17.0367	3.13394	45.5741	11.7582	102657	NM_133983
Cdon	213.003	-1.09303	0.180701	-6.04882	1.45913e-09	4.84814e-08	112.485	45.5822	274.331	25.1274	57810	NM_021339
Clec3b	680.065	-1.02339	0.132577	-7.71922	1.17047e-14	8.77016e-13	321.92	75.2495	748.167	102.193	21922	NM_011606
Col12a1	175.061	-1.50189	0.264576	-5.67658	1.37415e-08	3.80771e-07	100.794	52.1895	340.25	61.7454	12816	NM_001290308
Col5a3	435.935	-2.12903	0.228605	-9.31313	1.24118e-20	1.86e-18	172.71	73.6078	718.42	152.195	53867	NM_001317388
Col6a6	66.8905	-1.52158	0.329546	-4.6172	3.8896e-06	6.13413e-05	39.8329	22.3934	128.472	50.1269	245026	NM_001102607
Cspg4	209.24	-1.53314	0.176003	-8.71087	3.01556e-18	3.48712e-16	110.741	46.3823	269.005	42.1199	121021	NM_139001
Cyp1a1	17.8962	3.06248	0.660753	4.63483	3.57231e-06	5.70869e-05	24.2313	27.4437	3.51944	3.88648	13076	NM_001136059
Fbxl22	48.4286	-1.3957	0.208789	-6.68473	2.31345e-11	1.03355e-09	26.4541	6.16927	72.7038	14.487	74165	NM_175206
Hemk1	58.5922	-1.04431	0.227522	-4.58991	4.43428e-06	6.84771e-05	32.7794	6.65024	59.588	15.7535	69536	NM_133984
Islr	552.166	-1.07679	0.134388	-8.01254	1.12367e-15	9.42987e-14	293.179	75.4117	671.002	50.1064	26968	NM_001195431
Itga11	97.5238	-1.05592	0.215725	-4.89476	9.84259e-07	1.82051e-05	54.8102	22.0419	122.856	20.6787	319480	NM_176922
Kbtbd13	121.645	-2.03849	0.173507	-11.7487	7.1705e-32	3.00874e-29	46.283	29.7082	156.573	14.1337	74492	NM_028974
Ky	1622.63	-1.98414	0.287539	-6.9004	5.18561e-12	2.54702e-10	707.701	290.827	2662.9	597.316	16716	NM_024291
Ldlr	110.564	-1.77109	0.179376	-9.8736	5.41816e-23	1.09002e-20	61.7254	10.2682	192.249	17.3737	16835	NM_001252658
Loxl1	297.79	-1.39138	0.147128	-9.45693	3.17112e-21	5.1177e-19	166.024	28.0696	449.744	50.9406	16949	NM_010729
Lrrc2	856.816	1.35207	0.129625	10.4307	1.79631e-25	4.25495e-23	653.236	185.38	255.552	32.1079	74249	NM_028838
Me1	2213.96	-1.00793	0.169314	-5.95301	2.6326e-09	8.35041e-08	1021.36	198.706	2514.52	515.877	17436	NM_001198933
Myrip	56.5337	1.54207	0.295985	5.20996	1.8888e-07	4.18385e-06	68.5511	22.4818	25.5537	7.42059	245049	NM_144557
Oaf	111.498	-1.44461	0.185575	-7.78453	6.99744e-15	5.35232e-13	57.0753	14.1395	156.175	28.3543	102644	NM_178644
Pde4a	342.92	-1.47892	0.173296	-8.53408	1.4127e-17	1.52551e-15	171.114	58.0272	399.891	76.46	18577	NM_001310750
Plscr2	24.233	1.21281	0.234941	5.1622	2.44069e-07	5.21747e-06	27.6043	7.38113	13.7335	4.71423	18828	NM_001195084
Rasl12	72.0462	-1.09794	0.198381	-5.53449	3.12127e-08	8.11308e-07	45.1144	5.87021	91.7261	15.9641	70784	NM_001033158
Scn2b	23.8561	1.49779	0.310441	4.82472	1.402e-06	2.49574e-05	24.1597	9.29768	9.11392	2.84451	72821	NM_001014761
Scn5a	14.7474	2.23775	0.395774	5.65412	1.56643e-08	4.30796e-07	25.2869	6.13404	5.21144	0.710586	20271	NM_001253860
Sik2	268.709	1.02446	0.197069	5.19846	2.00942e-07	4.41111e-06	270.516	131.361	158.492	28.1804	235344	NM_178710
Slc26a6	66.0134	-1.03533	0.1741	-5.94678	2.73461e-09	8.63667e-08	32.3993	12.0339	67.203	6.48268	171429	NM_134420
Sln	154.517	2.16869	0.300317	7.22134	5.14773e-13	2.97636e-11	230.175	83.2086	55.4131	18.4337	66402	NM_025540
St14	10.0391	2.60573	0.572914	4.54821	5.41049e-06	8.12077e-05	31.1724	28.6082	4.90383	1.67819	19143	NM_011176
Tmem25	38.5389	-1.16348	0.238364	-4.88111	1.05491e-06	1.9414e-05	20.8681	4.82317	51.626	11.134	71687	NM_001357383
Zbtb16	1736.71	2.28377	0.195171	11.7014	1.25427e-31	5.11674e-29	1326.68	467.464	279.512	89.6668	235320	NM_001033324
