# Supplementary material for: Different phases of aging in mouse old skeletal muscle
Source: Aging (Albany NY). 2022 Jan 11;14(1):143–60. doi: 10.18632/aging.203812 (PMC8791220; doi:10.18632/aging.203812)
Supplement: Supplementary File 2 [file aging-14-203812-s003.xlsx]

## Sheet: FGSEA_figure2
Supplementary File 2. Lists of E-aging, L-aging, and EL-aging genes and their GO results.
pathway_HALLMARK	pval	padj	ES	NES	nMoreExtreme	size	no.leadingedge gene	leadingEdge
OXIDATIVE_PHOSPHORYLATION	0.00280112	0.00522139	-0.776244	-3.31266	0	177	127	COX5A NDUFA3 COX7B UQCRB COX7A2 NDUFB5 MDH1 TIMM8B NDUFA2 UQCR10 COX5B NDUFA4 COX6B1 UQCRH UQCR11 UQCRQ PDP1 NDUFC1 NDUFB4 COX6C NDUFA1 NDUFA6 LDHB NDUFS4 SLC25A3 NDUFS6 SDHD NDUFB2 UQCRFS1 NDUFA8 MPC1 NDUFB8 SLC25A4 NDUFB3 NDUFS7 SDHC HADHA NDUFB7 NDUFA5 COX7C NDUFS8 COX17 CYCS ATP6V1G1 COX4I1 PRDX3 UQCRC2 SDHB FXN HADHB NDUFB6 IDH3B MDH2 ACAA2 VDAC1 UQCRC1 NDUFA7 RHOT2 ETFDH ECH1 SLC25A20 SLC25…
MYC_TARGETS_V1	0.00291545	0.00522139	-0.507478	-2.20048	0	194	92	COX5A SLC25A3 PRDX3 COPS5 VDAC1 SRSF1 GLO1 SRSF2 CYC1 NDUFAB1 NME1 PSMB3 RPS10 CNBP LSM2 TARDBP EIF4E PSMA4 PSMC6 PSMA6 VDAC3 RPLP0 EIF2S2 RPS5 PGK1 H2AFZ MRPL23 PHB PSMD7 LDHA SSBP1 HNRNPA2B1 PSMA2 PSMB2 RPL14 PSMD14 RPS2 HSPE1 SNRPD2 PSMA1 ILF2 CCT3 UBE2E1 MRPL9 CLNS1A EEF1B2 PSMA7 HDGF PSMC4 CCT4 LSM7 GOT2 ACP1 PTGES3 PSMD3 RUVBL2 EXOSC7 SNRPG TXNL4A YWHAE RAN RPS6 HNRNPC AIMP2 PSMD8 HDDC2 SRS…
DNA_REPAIR	0.0026738	0.00522139	-0.473267	-1.97429	0	140	62	MPC2 COX17 POLR2K NME1 GUK1 SRSF6 AK1 GPX4 TAF13 TAF9 POLR2I POLB EIF1B TARBP2 GTF2H5 POLR1D TAF12 POLD4 ITPA RBX1 POLL BOLA2 NELFCD ADRM1 GTF2A2 ALYREF POLR2C POLR2G TAF10 SNAPC5 POLR2J POLE4 VPS28 EDF1 NUDT9 ZNRD1 TMED2 POLR3GL DGUOK CETN2 TSG101 APRT POLR2D NPR2 RPA2 NME4 RNMT POLR2H DDB2 SAC3D1 POLA2 POLR2E GTF2H3 ERCC1 TAF6 DAD1 MRPL40 SNAPC4 SURF1 RAD52 ERCC2 POLR3C
MYOGENESIS	0.00292398	0.00522139	-0.447401	-1.94191	0	196	63	FABP3 FHL1 CKMT2 CRYAB PDLIM7 MB PFKM CSRP3 COX7A1 MYL1 TNNI2 SH3BGR PGAM2 PVALB HSPB2 MYH2 TNNC2 TCAP MYOZ1 ENO3 MYLPF MYL2 COX6A2 CRAT GABARAPL2 ACTA1 LDB3 EIF4A2 TPD52L1 MAPK12 CASQ1 HSPB8 CAV3 AK1 MYL3 TNNT3 PPP1R3C GADD45B PKIA BIN1 SYNGR2 BAG1 CKM TPM2 SGCG HRC FXYD1 BHLHE40 DES SPEG PICK1 MYF6 MAPRE3 PRNP REEP1 TNNC1 PTP4A3 SH2B1 CACNG1 ATP6AP1 PYGM ATP2A1 AGL
FATTY_ACID_METABOLISM	0.00265957	0.00522139	-0.42592	-1.78336	0	146	54	MDH1 MCEE SDHD SDHC UROS MLYCD ACADS HADHB ACOT2 IDH3B ENO3 MDH2 ACAA2 ETFDH CRAT ECH1 SUCLG1 HADH ACADVL ALDH1A1 HSPH1 ALDOA DECR1 CPT2 ACADM SUCLA2 SMS H2AFZ HCCS LDHA GCDH UROD IDH3G G0S2 SDHA ACO2 MIF RETSAT CCDC58 ECI2 ALAD DLST METAP1 PDHA1 ACADL LGALS1 ECI1 PDHB ECHS1 BPHL DLD XIST AUH CPOX
ADIPOGENESIS	0.00291545	0.00522139	-0.347355	-1.50617	0	194	69	COX7B UQCR10 UQCR11 COQ9 UQCRQ UBC ESRRA SDHC NDUFB7 NDUFA5 PRDX3 SDHB ACADS MDH2 ACAA2 UQCRC1 NKIRAS1 CRAT ECH1 MGST3 SUCLG1 NDUFS3 CHCHD10 PHYH CYC1 NDUFAB1 ARAF HADH HSPB8 IDH3A ALDOA ABCB8 GPX4 CMBL VEGFB DNAJC15 DECR1 YWHAG CPT2 ACADM BCKDHA IDH3G ACO2 MTCH2 RETSAT COQ3 SAMM50 QDPR ETFB TOB1 GRPEL1 CD151 DHRS7B RNF11 PPM1B MRPL15 STOM ACADL GHITM CS COQ5 ECHS1 RIOK3 IMMT PTCD3 DLD AIFM1 DRAM…
REACTIVE_OXYGEN_SPECIES_PATHWAY	0.0272953	0.0401401	-0.43597	-1.49476	10	44	20	NDUFB4 NDUFA6 NDUFS2 PRDX2 EGLN2 GPX4 LAMTOR5 ATOX1 PRDX1 GLRX2 PRNP SOD2 GLRX CDKN2D TXNRD2 NQO1 STK25 OXSR1 PRDX6 SOD1
MYC_TARGETS_V2	0.0146699	0.0229218	-0.405068	-1.4633	5	58	29	NDUFAF4 HK2 DCTPP1 PHB TBRG4 HSPE1 SLC29A2 FARSA AIMP2 EXOSC5 MRTO4 RRP9 RABEPK SORD NIP7 LAS1L GNL3 PPRC1 GRWD1 NOP16 HSPD1 WDR74 SUPV3L1 NOP56 BYSL RRP12 PRMT3 MPHOSPH10 UNG
PROTEIN_SECRETION	0.0488599	0.0697999	0.358368	1.34548	29	93	34	SCRN1 CTSC SEC24D PAM ADAM10 ABCA1 EGFR PPT1 ATP7A RPS6KA3 LAMP2 AP2B1 ARFGAP3 ARCN1 GALC SNX2 COPB1 AP3B1 ATP1A1 CAV2 LMAN1 AP3S1 SEC31A AP1G1 SGMS1 VPS4B CLTA YIPF6 ARFIP1 SH3GL2 CLTC ATP6V1B1 M6PR RAB5A
P53_PATHWAY	0.0137615	0.0221959	0.326825	1.34737	8	189	63	TCN2 GM2A KRT17 ST14 APP NDRG1 DRAM1 PERP CLCA2 F2R CCND2 LRMP TM7SF3 TGFA CCND3 SP1 TGFB1 PLXNB2 SERPINB5 RGS16 IFI30 CASP1 PTPRE RAP2B VDR CEBPA RB1 ABAT UPP1 SLC7A11 SLC3A2 RALGDS EPHX1 SDC1 ABHD4 TAP1 PTPN14 ZFP36L1 INHBB ITGB4 APAF1 S100A4 VWA5A TM4SF1 SEC61A1 XPC CD81 ADA HMOX1 FOXO3 TCHH EPS8L2 BAIAP2 NINJ1 S100A10 MXD1 SOCS1 TRAF4 SPHK1 CCP110 DEF6 PRMT2 ATF3
G2M_CHECKPOINT	0.00773994	0.0128999	0.346867	1.42572	4	188	68	CCND1 TOP2A SLC38A1 MCM6 TGFB1 RACGAP1 SLC7A1 MEIS2 RAD21 MKI67 SQLE CKS1B CCNA2 STAG1 KIF11 SLC7A5 MYC RBL1 PRC1 WRN NCL NOTCH2 UBE2C CASP8AP2 ATRX CDKN2C KPNB1 E2F1 NUP98 BCL3 HIF1A EFNA5 PBK NUSAP1 SMC1A SMC2 PRIM2 SMAD3 CENPF KIF20B HMMR TLE3 BARD1 PML MAD2L1 CDC27 BUB1 SMC4 PLK4 CDK4 MCM5 MCM3 E2F2 CCNF MCM2 DBF4 INCENP AURKB GINS2 CDC20 POLQ SMARCC1 NEK2 CDC6 CCNT1 CDKN3 SUV39H1 TPX2
ANGIOGENESIS	0.0250417	0.037942	0.488114	1.51853	14	35	22	SLCO2A1 POSTN APP VAV2 CCND2 LUM FSTL1 VCAN PF4 STC1 S100A4 PRG2 THBD COL5A2 LPL TIMP1 TNFRSF21 APOH MSX1 NRP1 FGFR1 PGLYRP1
MITOTIC_SPINDLE	0.00151515	0.00386518	0.387362	1.60258	0	193	85	ACTN4 RAPGEF5 ARHGDIA TOP2A FLNB EZR ARHGEF3 PKD2 PREX1 RACGAP1 SEPT9 GSN ARHGAP29 MYO1E NET1 CEP192 DOCK2 RAPGEF6 KIF11 KIF3B MAPRE1 SHROOM2 CDC42EP4 CCDC88A FGD6 MYH10 PRC1 CD2AP BCR NOTCH2 ALMS1 SPTBN1 OPHN1 SPTAN1 WASF2 RALBP1 FLNA ARHGAP5 ABI1 FARP1 ARHGEF12 ROCK1 APC NUSAP1 SMC1A ARHGAP4 CTTN BCL2L11 CENPF KIF20B ANLN CDC27 NEDD9 MYH9 SMC3 BUB1 SMC4 NIN TUBGCP2 FGD4 RASA2 MYO9B AKAP13 PALLD…
XENOBIOTIC_METABOLISM	0.00154083	0.00386518	0.393206	1.61581	0	185	56	APOE POR IGFBP4 FBLN1 PROS1 CFB UGDH ELOVL5 PAPSS2 TMEM176B PGRMC1 IGF1 ESR1 IL1R1 ENPEP TNFRSF1A ABCD2 GCNT2 CDO1 HSD11B1 ENTPD5 FAH BCAT1 LPIN2 FMO1 TDO2 UPP1 PLG GCLC ADH7 EPHX1 FABP1 BLVRB VNN1 CAT ID2 ABCC3 RBP4 ALDH9A1 CYP2S1 IRF8 SPINT2 PTGES TMEM97 CD36 PGD SLC1A5 CYP2E1 ITIH4 UPB1 HMOX1 CNDP2 ARG1 NINJ1 CASP6 ALDH2
TGF_BETA_SIGNALING	0.00337268	0.00581497	0.483994	1.64865	1	54	24	XIAP RAB31 CDH1 TGFB1 THBS1 BCAR3 WWTR1 JUNB ID2 LTBP2 SMURF2 SPTBN1 BMPR2 RHOA CDKN1C APC HDAC1 SMAD3 SKIL TJP1 ENG SKI SMURF1 HIPK2
TNFA_SIGNALING_VIA_NFKB	0.00152439	0.00386518	0.41737	1.72186	0	190	98	DENND5A CCND1 CD44 IL6ST LITAF TNFAIP8 TNC DRAM1 SNN IFIT2 ABCA1 GFPT2 SPSB1 MAFF F2RL1 PTPRE CD83 IFIH1 TNFAIP3 PFKFB3 DDX58 KLF6 CSF1 EGR1 JUNB EHD1 TAP1 FOSL2 MYC ID2 CCL5 EDN1 IRS2 PLEK IL7R SLC2A3 NFKB1 BCL3 ICAM1 CFLAR GPR183 SOCS3 F3 SMAD3 DUSP4 NFKBIE TNF NFE2L2 FOSB AREG IRF1 CEBPD CCL2 NINJ1 SIK1 GEM NR4A3 EGR2 MXD1 TRAF1 FJX1 LDLR PLAUR SPHK1 NR4A2 RELA FUT4 IL18 ATF3 SERPINB2 EGR3 CD6…
HYPOXIA	0.00154799	0.00386518	0.421794	1.73014	0	184	75	CP DCN TGFBI LOX IGFBP3 BGN GPC3 ISG20 TMEM45A PLAC8 CAV1 NDRG1 SLC25A1 PAM PFKP GCNT2 IDS TGM2 SDC2 EXT1 PKP1 ANXA2 EGFR MAFF ATP7A PCK1 TES ALDOB TNFAIP3 ADORA2B ADM PFKFB3 SDC3 PFKL KLF6 CSRP2 PLIN2 RBPJ SLC2A5 FOSL2 STC1 SRPX PGM1 HS3ST1 CHST3 IRS2 ANGPTL4 SLC2A3 HK1 ALDOC BCL2 S100A4 AKAP12 CDKN1C PPFIA4 PDK3 ERRFI1 F3 HMOX1 FOXO3 PPARGC1A RORA CASP6 SLC2A1 KDM3A NR3C1 ENO1 FBP1 PLAUR CCNG2 …
CHOLESTEROL_HOMEOSTASIS	0.00167504	0.00386518	0.517324	1.83765	0	70	43	PPARG ALCAM CBS FADS2 FAM129A CD9 ANXA5 GPX8 LGMN LGALS3 FABP5 SQLE SREBF2 ANTXR2 AVPR1A HMGCR S100A11 CXCL16 FASN ACTG1 STARD4 ALDOC TMEM97 PDK3 MAL2 ERRFI1 GNAI1 GLDC GUSB LDLR PLAUR PLSCR1 ACAT2 ATF3 LPL IDI1 LSS NSDHL CLU CHKA ABCA2 TRIB3 DHCR7
UV_RESPONSE_DN	0.0015748	0.00386518	0.468142	1.85094	0	136	63	TGFBR2 PPARG KIT GCNT1 MGLL MET CAV1 LPAR1 EFEMP1 VAV2 DAB2 FYN PRKAR2B ABCC1 SRI SDC2 ANXA2 PTGFR ADD3 SLC7A1 PTPRM ATP2B4 ADORA2B DLC1 TFPI FBLN5 ATRN NIPBL PLCB4 MYC NOTCH2 INPP4B ATRX FHL2 NFKB1 SIPA1L1 AKT3 IGFBP5 GJA1 LTBP1 PHF3 PMP22 F3 RUNX1 ITGB3 SMAD3 GRK5 CDON COL11A1 TJP1 MTA1 ZMIZ1 NR3C1 INSIG1 TGFBR3 LDLR COL5A2 PTEN RASA2 MAGI2 FZD2 MAP1B ATP2B1
ESTROGEN_RESPONSE_EARLY	0.00152905	0.00386518	0.45398	1.87158	0	189	87	IGFBP4 MYOF CCND1 CD44 IL6ST NRIP1 ELOVL5 PAPSS2 ABHD2 ENDOD1 SLC24A3 NBL1 RAB31 TMEM164 SLC27A2 WWC1 KRT19 GFRA1 FLNB GAB2 TGM2 OLFML3 ADD3 CELSR1 LAD1 MLPH CLDN7 SLC39A6 DLC1 ABAT SCNN1A PGR OPN3 SLC7A5 FASN KCNK5 IL17RB BLVRB ELF1 KRT15 MYC THSD4 FRK INHBB SLC1A4 JAK2 PTGES CXCL12 KRT8 BCL11B FHL2 BCL2 SLC26A2 TUBB2B ESRP2 NPY1R KAZN FARP1 GJA1 DEPTOR OLFM1 TJP3 RASGRP1 GREB1 ABCA3 AREG RET EL…
APOPTOSIS	0.0015949	0.00386518	0.467838	1.878	0	155	67	DCN TIMP2 IFNGR1 XIAP CCND1 BGN EMP1 CD44 ANXA1 ISG20 PLAT DPYD APP CAV1 DAP TOP2A F2R CCND2 IFITM3 LUM TIMP3 GSN CASP8 LGALS3 RNASEL PPT1 CASP1 DNAJC3 PSEN1 ADD1 CD14 AVPR1A HGF MMP2 PDCD4 WEE1 CD38 CASP3 IGFBP6 TAP1 CASP4 SPTAN1 TSPO ERBB3 PRF1 CD2 BID CFLAR ROCK1 HMOX1 HMGB2 TNF BCL2L11 F2 IRF1 BRCA1 CASP6 BMF TGFBR3 BCL2L1 PMAIP1 NEDD9 RELA IL18 ATF3 EGR3 CD69
APICAL_SURFACE	0.00170068	0.00386518	0.599915	1.92641	0	41	24	SULF2 ATP8B1 GAS1 APP LYN ADAM10 IL2RG IL2RB CX3CL1 ADIPOR2 SHROOM2 THY1 AFAP1L2 SRPX NTNG1 EFNA5 SCUBE1 MAL BRCA1 PLAUR ATP6V0A4 GATA3 AKAP7 LYPD3
ANDROGEN_RESPONSE	0.00161812	0.00386518	0.52936	1.98222	0	91	34	FADS1 CCND1 MERTK B2M ACTN1 ELOVL5 ABHD2 AKT1 IQGAP2 NDRG1 TNFAIP8 SEC24D GNAI3 STK39 DHCR24 ARID5B KRT19 CCND3 ALDH1A3 NCOA4 HPGD RPS6KA3 HMGCR STEAP4 PGM3 PTK2B CAMKK2 TMPRSS2 AZGP1 LMAN1 INPP4B KRT8 SLC26A2 AKAP12
ESTROGEN_RESPONSE_LATE	0.00154083	0.00386518	0.485789	1.99627	0	185	92	IGFBP4 MYOF CCND1 CD44 IL6ST NRIP1 UGDH ELOVL5 PAPSS2 ABHD2 ISG20 ST14 SLC24A3 CAV1 NBL1 RAB31 PERP TOP2A CD9 SLC27A2 TRIM29 KRT19 PRLR FLNB CDH1 PRKAR2B HMGCS2 PTGER3 ADD3 EMP2 FABP5 ATP2B4 SNX10 PCP4 SCNN1A PKP3 PGR PTPN6 PDCD4 OPN3 SLC7A5 GALE KCNK5 IL17RB MDK PLXNB1 BLVRB SCUBE2 LAMC2 ID2 FRK SLC1A4 JAK2 PTGES CXCL12 BCL2 SLC26A2 MAPK13 NPY1R FARP1 CKB OLFM1 TJP3 DLG5 LSR ABCA3 AREG RET LTF A…
IL2_STAT5_SIGNALING	0.00152905	0.00386518	0.509441	2.10022	0	189	100	FGL2 IFNGR1 DENND5A TTC39B EMP1 CD44 ITGA6 ALCAM TLR7 IRF6 NDRG1 TNFRSF1B IRF4 MYO1C NT5E TWSG1 CCND2 P2RX4 IFITM3 SELP CCND3 PENK SWAP70 TGM2 SH3BGRL2 IL2RB ITIH5 FAH MAFF CDCP1 RGS16 CYFIP1 MYO1E CD83 PLAGL1 AHR ENPP1 SLC39A8 LRRC8C CKAP4 KLF6 CSF1 ECM1 PNP CASP3 IL10RA PLIN2 GALM RABGAP1L MAP6 MYC GLIPR2 IL1R2 PTGER2 IRF8 SLC2A3 CD48 SELL SERPINC1 CD86 IL2RA BCL2 GPR65 BMPR2 CDKN1C ARL4A SLC1A…
APICAL_JUNCTION	0.00154799	0.00386518	0.52376	2.1528	0	188	88	TGFBI ACTN4 NEGR1 LIMA1 CDH11 MSN PARVA ACTN1 CTNNA1 MPZL2 PECAM1 VAV2 CAP1 CADM3 SGCE ACTG2 EVL CDH1 ZYX ADAM15 SIRPA ATP1A3 EGFR RSU1 VCAM1 CDSN SYK PARD6G CD34 GNAI2 CLDN7 ITGA9 RAC2 VCAN PTPRC CX3CL1 CLDN4 CNN2 MYL12B SDC3 MMP2 AMIGO2 DSC3 GRB7 PPP2R2C COL17A1 MDK ACTG1 SHROOM2 THY1 DSC1 LAMC2 ITGA2 CD274 MYH10 CLDN8 ITGB4 RRAS SHC1 MAPK11 CD86 THBS3 AKT3 SLIT2 MAPK13 ICAM1 CDH3 LAYN CTNND1 G…
KRAS_SIGNALING_UP	0.00155521	0.00386518	0.538205	2.20653	0	186	93	CFH IGFBP3 GABRA3 CFB IL1RL2 EMP1 TLR8 TMEM176B GPNMB ITGBL1 FCER1G PLAT TNFRSF1B MPZL2 ACE PECAM1 PSMB8 CCND2 HSD11B1 PIGR LAPTM5 F13A1 AVL9 APOD CTSS C3AR1 ALDH1A3 TMEM176A ITGB2 GFPT2 IL2RG PLVAP MMD LCP1 RGS16 F2RL1 SCG3 STRN RETN TNFAIP3 CBL IKZF1 DOCK2 PCP4 TFPI RELN ST6GAL1 MALL EPHB2 GPRC5B MAP4K1 ADAM8 KIF5C IL10RA RABGAP1L BTC CD37 ITGA2 ID2 CSF2RA ETV1 TPH1 ALDH1A2 RBP4 ANGPTL4 TMEM158…
COMPLEMENT	0.00156006	0.00386518	0.548286	2.24175	0	182	84	CFH APOC1 CP CSRP1 TIMP2 C3 C2 SERPING1 CFB C1S DPP4 GNG2 CTSH LIPA ITGAM CTSC CTSB FCER1G PLAT PLA2G4A LYN C1QA C1QC GNAI3 MMP14 FYN PIK3CG CTSS ANXA5 RNF4 LGMN DOCK10 PRCP IRF7 MAFF LGALS3 PIK3R5 SCG3 CASP1 GNAI2 LAMP2 TNFAIP3 PSEN1 LCP2 F8 PLG CASP3 CTSO GMFB EHD1 CCL5 FN1 WAS CASP4 PLEK SERPINC1 JAK2 GZMB CD36 CPM PSMB9 CPQ MMP15 RASGRP1 F3 LCK USP8 MMP12 ZFPM2 BRPF3 F2 IRF1 LTF AKAP10 ZEB1 P…
EPITHELIAL_MESENCHYMAL_TRANSITION	0.00152905	0.00386518	0.549696	2.26617	0	189	98	DCN TGFBI SFRP1 IGFBP4 FBLN1 LOX IGFBP3 CDH11 TPM4 BGN CD44 COMP COL12A1 SLIT3 POSTN DPYSL3 ABI3BP GAS1 CALU TNC MMP14 NT5E WIPF1 DAB2 THBS2 CALD1 ANPEP FMOD BASP1 LUM MATN2 OXTR VIM ACTA2 TIMP3 ADAM12 TGFB1 TGM2 THBS1 VCAM1 NNMT FSTL1 TNFAIP3 VCAN MGP TAGLN LOXL2 ECM2 SFRP4 MMP2 FBLN5 ECM1 PCOLCE COL8A2 SDC1 THY1 LAMC2 ITGA2 EDIL3 ID2 MFAP5 EFEMP2 FN1 MMP3 PPIB FBN2 SNTB1 NOTCH2 CXCL12 COPA EMP3…
INFLAMMATORY_RESPONSE	0.00152439	0.00386518	0.550354	2.27048	0	190	115	CYBB AXL CXCL9 LY6E SGMS2 GPC3 IL1R1 MET TNFRSF1B LPAR1 LYN PCDH7 GNAI3 OSMR MMP14 PTAFR P2RX4 C3AR1 ABCA1 SRI IRF7 IL2RB SLC7A1 RGS16 PIK3R5 PTPRE P2RX7 ADORA2B PSEN1 BST2 CD14 LCP2 ADM CX3CL1 AHR RTP4 MSR1 TLR3 PDPN KLF6 CSF1 IRAK2 IL10RA IFITM1 CALCRL MYC CCL5 EDN1 PTGER2 IL7R CD48 SELL TAPBP EIF2AK2 EMP3 NFKB1 ITGB8 ABI1 C5AR1 ICAM1 GPR183 HIF1A TLR1 CLEC5A RASGRP1 F3 LCK ITGB3 NMI IL18R1 IRF…
INTERFERON_ALPHA_RESPONSE	0.00162866	0.00386518	0.615912	2.28203	0	87	51	IFITM2 LY6E B2M C1S ISG20 LGALS3BP NCOA7 PSMB8 IFITM3 TRIM14 IFIT2 RSAD2 CD74 IRF7 UBE2L6 EPSTI1 CASP8 PARP14 GBP2 IFI30 MOV10 CASP1 IFIH1 BST2 RTP4 CSF1 IFITM1 PARP9 ELF1 IRF9 TRIM21 SAMD9L TAP1 HERC6 CMPK2 ADAR SELL IL7 CD47 EIF2AK2 USP18 CNP PSMB9 SP110 BATF2 NMI IRF1 LPAR6 DDX60 PLSCR1 PARP12
ALLOGRAFT_REJECTION	0.0015625	0.00386518	0.565979	2.31104	0	179	106	CXCL9 IFNGR1 C2 B2M AKT1 GCNT1 CCR1 CCR5 IRF4 LYN SRGN F2R CCND2 FCGR2B CTSS PRKCB CCND3 LY86 ITGB2 CD74 IL2RG TGFB1 IRF7 IL2RB EGFR GBP2 IFNAR2 BCAT1 HCLS1 LCP2 PTPRC TAP2 CSK TLR3 CFP PTPN6 CSF1 IGSF6 MAP4K1 FGR KRT1 PF4 THY1 STAT1 TAP1 CCL5 ELF4 WAS LY75 INHBB IRF8 CD3D JAK2 IL7 GZMB TAPBP CD47 CD86 STAT4 IL2RA EIF3A FLNA GPR65 PRF1 ABI1 CD2 DEGS1 BCL3 ICAM1 CD4 HIF1A TLR1 LCK TNF CAPG CD79A F…
IL6_JAK_STAT3_SIGNALING	0.00160514	0.00386518	0.645695	2.38163	0	83	55	IL13RA1 CXCL9 IFNGR1 LEPR CSF2RB CD44 IL6ST PDGFC CCR1 IL1R1 TNFRSF1B TNFRSF1A ITGA4 OSMR CD9 IL2RG TGFB1 PIK3R5 CD14 CBL IL17RA CSF1 CD38 PF4 IL17RB STAT1 IRF9 CSF2RA IL1R2 IL7 STAT3 ACVRL1 IL2RA IL10RB CD36 SOCS3 HMOX1 ITGB3 PTPN11 TNF IL18R1 PTPN1 IRF1 SOCS1 CCL7 A2M IL9R CRLF2 LTB CSF3R TLR2 MYD88 MAP3K8 IL12RB1 EBI3
COAGULATION	0.0015949	0.00386518	0.620052	2.43924	0	133	80	CFH APOC1 CSRP1 GDA C3 C2 PROS1 SERPING1 CFB SH2B2 ANXA1 COMP C1S DPP4 CTSH CTSB PLAT CAPN5 PECAM1 C1QA MMP14 CD9 ARF4 FYN TIMP3 HMGCS2 GNG12 LGMN THBS1 GSN MAFF APOA1 LAMP2 F8 CFD PLG MMP2 FGA PF4 CTSO ITGA2 FN1 FGG MMP3 PLEK CTSE SERPINC1 CAPN2 APOC3 CPQ MMP15 F3 ITGB3 CFI F2 THBD USP11 A2M VWF RGN WDR1 SERPINB2 F10 ITIH1 HTRA1 HRG F2RL2 TMPRSS6 MMP8 LRP1 MMP9 ACOX2 CLU TIMP1 CTSK ANG MBL2 HNF4…
INTERFERON_GAMMA_RESPONSE	0.00154799	0.00386518	0.61304	2.5146	0	184	115	FGL2 CFH IFITM2 CXCL9 MARCH1 SERPING1 CFB LY6E CSF2RB B2M ZBP1 C1S ISG20 LGALS3BP IRF4 RIPK1 PLA2G4A PSMB8 PFKP ARID5B IFITM3 SELP TRIM14 IFIT2 RSAD2 IRF5 CIITA CD74 SRI IRF7 IL2RB UBE2L6 EPSTI1 CASP8 VCAM1 PARP14 IFNAR2 SLAMF7 IFI30 CASP1 NLRC5 IFIH1 TNFAIP3 BST2 LCP2 RTP4 DDX58 ISOC1 UPP1 SAMHD1 RAPGEF6 PTPN6 CD38 LATS2 PNP CASP3 IL10RA STAT1 IRF9 TRIM21 SAMD9L TAP1 HERC6 OAS3 CCL5 CD274 CMPK2 …
pathway_KEGG	pval	padj	ES	NES	nMoreExtreme	size	no.leadingedge gene	leadingEdge
PARKINSONS_DISEASE	0.00257069	0.0103945	-0.819276	-3.2408	0	95	65	COX5A NDUFA3 COX7B UQCRB COX7A2 NDUFB5 NDUFV3 NDUFB9 NDUFA2 UQCR10 COX5B NDUFA4 COX6B1 UQCRH UQCR11 UQCRQ NDUFB10 NDUFC1 NDUFB4 COX6C NDUFA1 NDUFA6 NDUFS4 COX7A1 NDUFS6 SDHD NDUFB2 UQCRFS1 NDUFA8 NDUFB8 SLC25A4 NDUFB3 NDUFS7 SDHC NDUFB7 NDUFA5 COX7C NDUFS8 CYCS COX4I1 UQCRC2 SDHB NDUFB6 VDAC1 UQCRC1 NDUFA7 COX6A2 NDUFS3 NDUFA9 CYC1 NDUFAB1 NDUFS1 NDUFS2 VDAC2 NDUFV2 PPID COX7A2L PARK7 VDAC3 UBE2G…
OXIDATIVE_PHOSPHORYLATION	0.00257069	0.0103945	-0.817106	-3.23222	0	95	66	COX5A NDUFA3 COX7B UQCRB COX7A2 NDUFB5 NDUFV3 NDUFB9 NDUFA2 UQCR10 COX5B NDUFA11 NDUFA4 COX6B1 UQCRH UQCR11 UQCRQ NDUFB10 NDUFC1 NDUFB4 COX6C NDUFA1 NDUFA6 NDUFS4 COX7A1 NDUFS6 SDHD NDUFB2 UQCRFS1 NDUFA8 NDUFB8 NDUFB3 NDUFS7 SDHC NDUFB7 NDUFA5 COX7C NDUFS8 COX17 ATP6V1G1 COX4I1 UQCRC2 SDHB NDUFB6 UQCRC1 NDUFA7 COX6A2 NDUFS3 NDUFA9 CYC1 NDUFAB1 NDUFS1 NDUFS2 ATP6V0B NDUFV2 COX7A2L ATP6V1F NDUFV1 A…
RIBOSOME	0.00253165	0.0103945	-0.796021	-3.07235	0	82	70	RPS29 RPL31 RPLP1 RPS27L RPS20 UBA52 RPS13 RPL36 RPL29 RPS17 RPL37A RPS25 RPS28 RPL24 RPL12 RPL27 RPS15A RPS12 RPL13 RPS10 RPLP2 RPS21 RPL37 RPL7A RPL38 RPL3L RPL32 RPL41 RPL36A RPS24 RPLP0 RPL17 RPSA RPS5 MRPL13 RPL23A RPL10 RPL36AL RPL14 RPS26 RPS27A RPS2 RPS16 RPL15 RPS8 RPL11 RPS23 RPL35 RPS15 RPS19 RPL28 RPL21 RPL39 RPL7 RPL23 RPL35A RPS11 RPL22L1 RPS18 RSL24D1 RPS6 RPL13A RPL18A RPL10A FAU …
PROTEASOME	0.00243309	0.0103945	-0.746134	-2.54518	0	42	31	PSMD6 PSMB3 PSMA3 POMP PSMA4 PSMA5 PSMC6 PSMA6 PSMB4 PSMC3 PSMC2 PSMB1 PSMD7 PSMB7 PSMB6 PSMB5 PSMA2 PSMB2 PSMD14 PSME4 PSMD4 PSMA1 PSMD12 PSMA7 PSMC4 PSMD3 PSMC1 PSMD8 PSMC5 PSMD1 PSMD11
HUNTINGTONS_DISEASE	0.00277778	0.0105442	-0.668284	-2.78897	0	142	75	COX5A NDUFA3 COX7B UQCRB COX7A2 NDUFB5 NDUFV3 NDUFB9 NDUFA2 UQCR10 COX5B NDUFA4 COX6B1 UQCRH UQCR11 UQCRQ NDUFB10 NDUFC1 NDUFB4 COX6C NDUFA1 NDUFA6 NDUFS4 COX7A1 NDUFS6 SDHD NDUFB2 UQCRFS1 NDUFA8 NDUFB8 SLC25A4 NDUFB3 NDUFS7 SDHC NDUFB7 NDUFA5 COX7C NDUFS8 CYCS COX4I1 UQCRC2 SDHB NDUFB6 VDAC1 UQCRC1 NDUFA7 COX6A2 POLR2L POLR2K NDUFS3 NDUFA9 CYC1 NDUFAB1 NDUFS1 NDUFS2 VDAC2 NDUFV2 PPID COX7A2L VDA…
RNA_POLYMERASE	0.00236967	0.0103945	-0.659614	-2.00951	0	27	14	POLR2L POLR2K POLR2I POLR1D POLR2C POLR2G POLR2J ZNRD1 POLR3GL POLR2D POLR2H POLR3D POLR3K POLR2E
CARDIAC_MUSCLE_CONTRACTION	0.00245098	0.0103945	-0.658197	-2.47495	0	68	26	COX5A COX7B UQCRB COX7A2 UQCR10 COX5B COX6B1 UQCRH UQCR11 UQCRQ COX6C COX7A1 UQCRFS1 COX7C COX4I1 UQCRC2 TPM1 UQCRC1 MYL2 COX6A2 CYC1 CACNG6 MYL3 COX7A2L TPM2 ATP1B1
CITRATE_CYCLE_TCA_CYCLE	0.00473934	0.0163244	-0.64577	-1.96733	1	27	21	MDH1 SDHD SDHC SDHB IDH3B MDH2 SUCLG1 IDH3A SUCLA2 IDH2 IDH3G SDHA ACO2 DLST PDHA1 CS PDHB DLD DLAT SUCLG2 OGDH
PROTEIN_EXPORT	0.00240385	0.0103945	-0.638078	-1.84646	0	21	9	IMMP1L SEC61G SRP14 SRP19 SEC61B SPCS1 SRP9 SEC11C SEC61A2
ALZHEIMERS_DISEASE	0.00265957	0.0105251	-0.60621	-2.52445	0	137	59	COX5A NDUFA3 COX7B UQCRB COX7A2 NDUFB5 NDUFV3 NDUFB9 NDUFA2 UQCR10 COX5B NDUFA4 COX6B1 UQCRH UQCR11 UQCRQ NDUFB10 NDUFC1 NDUFB4 COX6C NDUFA1 NDUFA6 NDUFS4 COX7A1 NDUFS6 SDHD NDUFB2 UQCRFS1 NDUFA8 NDUFB8 NDUFB3 NDUFS7 SDHC NDUFB7 NDUFA5 COX7C NDUFS8 CYCS COX4I1 UQCRC2 SDHB NDUFB6 UQCRC1 NDUFA7 COX6A2 NDUFS3 NDUFA9 CYC1 NDUFAB1 NDUFS1 GAPDH NDUFS2 NDUFV2 COX7A2L NDUFV1 NDUFC2 CALM1 SDHA NDUFS5
AMINOACYL_TRNA_BIOSYNTHESIS	0.00245098	0.0103945	-0.573093	-1.94085	0	41	28	LARS2 PSTK FARSB MARS AARS2 AARS FARSA YARS SARS2 DARS CARS2 TARSL2 CARS YARS2 NARS SARS TARS2 DARS2 MTFMT EPRS LARS EARS2 PARS2 HARS RARS2 FARS2 HARS2 NARS2
PYRUVATE_METABOLISM	0.00956938	0.0289532	-0.541639	-1.77407	3	36	18	MDH1 ACYP2 LDHB MDH2 GLO1 PKM ME3 ACAT1 LDHA ACYP1 LDHD HAGH PDHA1 HAGHL PDHB DLD DLAT GRHPR
SNARE_INTERACTIONS_IN_VESICULAR_TRANSPORT	0.0191388	0.0494418	-0.518165	-1.66645	7	33	14	USE1 VTI1B SNAP47 BET1 VAMP5 STX8 VAMP1 BNIP1 YKT6 VAMP3 SEC22B BET1L VAMP8 STX16
VALINE_LEUCINE_AND_ISOLEUCINE_DEGRADATION	0.00980392	0.0289532	-0.517306	-1.75192	3	41	20	MCEE HADHA ACADS HADHB OXCT1 ACAA2 HADH ACADM AOX1 ACAT1 BCKDHA ECHS1 DLD AUH ACADSB HMGCL ACAD8 PCCA IVD BCAT2
FATTY_ACID_METABOLISM	0.0190024	0.0494418	-0.50677	-1.64712	7	35	16	HADHA ACADS HADHB ACAA2 HADH ACADVL CPT2 ACADM ACAT1 GCDH ECI2 ACSL6 ACADL ECI1 ADH5 ECHS1
SPLICEOSOME	0.00277778	0.0105442	-0.489209	-1.98228	0	120	64	SRSF1 HSPA1L SRSF2 SRSF6 LSM2 SRSF5 SNRNP70 PHF5A HSPA8 CWC15 SNRNP27 SNRPB LSM6 SNRPF BUD31 CCDC12 SNRPD2 LSM4 SNRPE SF3B1 ALYREF SNRPC LSM7 HNRNPM TRA2A MAGOH SNRPG LSM3 TXNL4A HNRNPC THOC1 SRSF7 SF3B5 SRSF10 PCBP1 PRPF40B SNRPD3 DDX5 BCAS2 SNRPB2 HSPA1A SMNDC1 PLRG1 PRPF4 ZMAT2 PRPF19 PPIE PRPF38A DDX39B HNRNPA1 CDC5L SF3A2 HSPA2 PPIL1 PUF60 PPIH SNRPA1 LSM5 MAGOHB SRSF3 NCBP2 RBM25 NCBP1 SNRPA
PEROXISOME	0.0125628	0.0354043	-0.386418	-1.47013	4	75	30	PXMP2 MLYCD CRAT ECH1 NUDT19 PHYH PEX11B PRDX5 IDH2 GSTK1 ABCD3 PEX7 PEX2 PRDX1 ECI2 SOD2 ACSL6 GNPAT AMACR PEX26 SOD1 PEX6 HMGCL PEX19 DDO MPV17 PEX10 PEX12 CROT ACSL3
CALCIUM_SIGNALING_PATHWAY	0.00771605	0.0243252	0.337803	1.3636	4	163	69	PLCB1 PDE1A PDGFRA ADCY3 PRKX PLCE1 F2R PTAFR P2RX4 PRKCB OXTR PLCG2 PTGER3 BST1 PTGFR EGFR CYSLTR1 ATP2B4 P2RX7 CALML3 ADORA2B CHP2 AVPR1A ADCY7 CD38 PLCB3 EDNRA PTK2B PLCB4 GNAL CHP1 EDNRB ATP2A3 ERBB3 ATP2B2 SLC8A3 PHKA2 MYLK TRPC1 HRH2 ADCY1 ITPR2 CYSLTR2 CACNA1D SPHK1 ERBB4 ITPR1 SLC25A5 CACNA1E ADRB3 TACR1 ATP2B1 NOS2 ITPKA NOS3 PLCD3 GNA15 BDKRB2 PLCB2 ADORA2A ADRA1A SLC8A1 ITPKB CACNA1C P…
WNT_SIGNALING_PATHWAY	0.00466563	0.0163244	0.369104	1.46297	2	140	43	SFRP1 PLCB1 CCND1 SFRP2 SFRP5 FZD1 PRKX CCND2 TBL1X PRKCB CCND3 PPP2R1B PPP2R5A VANGL1 RAC2 PSEN1 CHP2 SFRP4 PLCB3 PLCB4 PRICKLE2 MYC WNT7B FZD3 CHP1 FZD10 WNT2B WNT2 FZD4 LRP6 RHOA FZD6 ROCK1 APC SMAD3 NKD1 VANGL2 WIF1 WNT6 NFATC3 TCF7 TCF7L1 RAC3
SYSTEMIC_LUPUS_ERYTHEMATOSUS	0.0196078	0.0499597	0.386818	1.4237	11	85	14	ACTN4 C3 C2 ACTN1 C1S C1QB C6 C1QA C1QC FCGR2B C4B C7 H2AFY2 TRIM21
MELANOGENESIS	0.014658	0.0400939	0.390478	1.45458	8	93	31	KIT PLCB1 ADCY3 FZD1 PRKX GNAI3 PRKCB GNAI2 CALML3 ADCY7 PLCB3 MAPK3 PLCB4 WNT7B CREB1 CREB3L1 EDN1 FZD3 EDNRB FZD10 WNT2B WNT2 FZD4 FZD6 GNAI1 WNT6 KRAS ADCY5 ADCY1 TCF7 TCF7L1
PROGESTERONE_MEDIATED_OOCYTE_MATURATION	0.0164745	0.0444094	0.397111	1.45498	9	82	31	ADCY3 AKT1 IGF1 PRKX GNAI3 PDE3B PIK3CG PIK3R5 GNAI2 RPS6KA3 CCNA2 PGR ADCY7 MAPK3 CDC16 MAPK11 RPS6KA1 AKT3 MAPK13 BRAF GNAI1 PDE3A CCNB1 KRAS ADCY5 RPS6KA6 ADCY1 MAD2L1 CDC27 BUB1 ANAPC1
GAP_JUNCTION	0.00993377	0.0289532	0.412497	1.48942	5	75	27	PLCB1 PDGFRA ADCY3 PDGFC PRKX LPAR1 GNAI3 PRKCB EGFR GNAI2 ADCY7 PLCB3 MAPK3 PLCB4 TUBA1A TUBB2B GJA1 GNAI1 PDGFD MAP3K2 TJP1 KRAS ADCY5 ADCY1 ITPR2 SRC ITPR1
PROSTATE_CANCER	0.00490998	0.0166047	0.413459	1.51726	2	84	31	PDGFRA CCND1 PDGFC AKT1 IGF1 HSP90B1 PIK3CG TGFA EGFR PIK3R5 CREB5 RB1 FGFR2 MAPK3 CREB1 CREB3L1 NFKB1 BCL2 AKT3 E2F1 BRAF PDGFD KRAS TCF7 TCF7L1 PTEN RELA E2F2 HSP90AA1 PIK3CB CREB3L2
NEUROACTIVE_LIGAND_RECEPTOR_INTERACTION	0.0015083	0.00849781	0.416989	1.73896	0	218	85	GABRA3 LEPR LPAR1 ADCYAP1R1 F2R PTAFR P2RX4 PRLR C3AR1 OXTR TSHR PTGER3 PTGFR F2RL1 CYSLTR1 P2RX7 ADORA2B AVPR1A S1PR1 PLG EDNRA CALCRL S1PR2 PTGER2 EDNRB LPAR3 P2RY10 P2RY13 TSPO GLRB GRIA3 MC5R C5AR1 NPY1R MC2R F2 CNR2 HRH2 LPAR6 GRIK5 NR3C1 CYSLTR2 CNR1 FPR2 GHR ADRA2C ADRB3 PTH1R TACR1 P2RY14 GRIK2 F2RL2 CHRNA9 GABRP P2RY6 PTGER4 BDKRB2 GRIA1 SSTR4 RXFP1 GPR35 ADORA2A VIPR2 ADRA1A CHRNA4 FPR1…
NEUROTROPHIN_SIGNALING_PATHWAY	0.00156006	0.00849781	0.418385	1.61825	0	117	40	MAGED1 SORT1 SH2B2 AKT1 YWHAB ARHGDIA NTRK2 MAP3K5 PIK3CG YWHAQ RAP1B PLCG2 ARHGDIB PIK3R5 IRAK3 RPS6KA3 CALML3 PSEN1 CSK IRAK2 NGFR MAPK3 IRS2 IRAK4 SHC1 MAPK11 RPS6KA1 NFKB1 BCL2 AKT3 RHOA MAPK13 MAP3K3 BRAF FOXO3 PTPN11 NFKBIE KRAS RPS6KA4 RPS6KA6
PATHWAYS_IN_CANCER	0.00149701	0.00849781	0.420163	1.80924	0	304	121	TGFBR2 PPARG KIT XIAP LAMB1 PDGFRA CCND1 ITGA6 CTNNA1 AKT1 FZD1 IGF1 MET HSP90B1 CSF1R LAMA4 PIK3CG CDH1 PRKCB TGFA PLCG2 SMO NCOA4 TGFB1 TPR RASSF5 EGFR CASP8 PIK3R5 CEBPA RAC2 RB1 CKS1B CBL HGF ARNT2 FGFR2 MMP2 RALGDS DAPK1 CASP3 MAPK3 STAT1 LAMC2 ITGA2 LAMC3 MYC WNT7B CSF2RA GLI3 FN1 MSH6 FZD3 BCR FZD10 STAT3 WNT2B WNT2 FZD4 RALBP1 NFKB1 BCL2 AKT3 E2F1 STK4 RHOA FGF10 BID FLT3 FZD6 HIF1A APC B…
ARRHYTHMOGENIC_RIGHT_VENTRICULAR_CARDIOMYOPATHY_ARVC	0.00500835	0.0166349	0.425119	1.51911	2	72	32	ACTN4 DSP ITGA6 ACTN1 CTNNA1 ITGA4 ITGA8 ITGA1 DSG2 ITGA9 ACTG1 ITGA2 ITGB4 ITGB8 GJA1 ITGB3 ITGB7 ITGA11 SGCD TCF7 CACNA1D ITGA3 CACNB4 TCF7L1 ITGB1 CDH2 CACNB3 CACNB2 PKP2 SLC8A1 CACNA1C ACTB
ENDOCYTOSIS	0.00152905	0.00849781	0.42593	1.73017	0	166	76	KIT PDGFRA NEDD4 PRKCI CCR5 MET ASAP1 CSF1R RAB31 F2R DAB2 ARAP2 IL2RG IL2RB ACAP2 EGFR PARD6G RAB11FIP1 CBL AP2B1 ARFGAP3 PIKFYVE FGFR2 ARRB1 EHD4 PDCD6IP EHD1 RAB11FIP4 EEA1 PSD4 IQSEC2 SMURF2 DNAJC6 RAB11FIP2 ERBB3 IL2RA EHD2 RAB5C ASAP2 USP8 EPN3 GRK5 SH3GL3 ITCH ARAP1 PIP5K1C RET VPS4B LDLR CLTA FGFR3 ERBB4 SRC CXCR2 SMURF1 PRKCZ ADRB3 ARF6 DNM1 AGAP1 GIT2 SH3GL2 TRAF6 PARD6B CLTC GRK6 LDLRA…
COLORECTAL_CANCER	0.010118	0.0289532	0.433045	1.50597	5	61	22	TGFBR2 CCND1 AKT1 PIK3CG TGFB1 PIK3R5 RAC2 RALGDS CASP3 MAPK3 MYC MSH6 BCL2 AKT3 RHOA APC BRAF SMAD3 KRAS TCF7 TCF7L1 RAC3
TOLL_LIKE_RECEPTOR_SIGNALING_PATHWAY	0.00163399	0.00849781	0.435452	1.60647	0	87	45	CXCL9 TLR8 AKT1 TLR7 RIPK1 PIK3CG TLR4 TLR5 IRF5 IRF7 CASP8 IFNAR2 PIK3R5 TICAM2 TLR9 CD14 TLR3 LBP MAPK3 STAT1 CCL5 IRAK4 MAPK11 CD86 NFKB1 AKT3 MAPK13 TLR1 TNF CD40 RELA TBK1 TLR2 TRAF3 PIK3CB MYD88 MAP3K8 TRAF6 TLR6 CTSK IFNAR1 CCL3 LY96 CCL4 PIK3R2
FC_EPSILON_RI_SIGNALING_PATHWAY	0.00331126	0.0123179	0.445329	1.60797	1	75	26	AKT1 FCER1G PLA2G4A LYN VAV2 FYN PIK3CG PLA2G2D PRKCB GAB2 PLCG2 INPP5D SYK PIK3R5 RAC2 LCP2 BTK MAPK3 VAV1 MAPK11 AKT3 MAPK13 PLA2G2F FCER1A TNF KRAS
CYTOSOLIC_DNA_SENSING_PATHWAY	0.0170068	0.0451895	0.450972	1.4554	9	40	16	ZBP1 RIPK1 IRF7 PYCARD CASP1 TMEM173 DDX58 CCL5 ADAR NFKB1 IL33 RIPK3 AIM2 RELA IL18 TBK1
TGF_BETA_SIGNALING_PATHWAY	0.00163666	0.00849781	0.453808	1.66533	0	84	31	DCN TGFBR2 COMP THBS4 THBS2 SP1 PPP2R1B TGFB1 THBS1 MAPK3 ZFYVE16 MYC ID2 RBL1 ACVR1C INHBB SMURF2 ACVRL1 GDF5 THBS3 BMPR2 RHOA ROCK1 LTBP1 GDF7 SMAD3 TNF BMP7 BMP5 BMPR1B SMURF1
T_CELL_RECEPTOR_SIGNALING_PATHWAY	0.00158479	0.00849781	0.454103	1.72735	0	103	51	AKT1 VAV2 FYN PIK3CG CARD11 PIK3R5 LCP2 PTPRC CHP2 CBL PTPN6 PAK2 MAPK3 VAV1 CHP1 CD3D PAK3 MAPK11 MAP3K14 NFKB1 AKT3 RHOA MAPK13 CD4 RASGRP1 GRAP2 LCK NFKBIE TNF MALT1 CD8A KRAS CD3E CD3G NFATC3 PAK4 PDCD1 RELA CDK4 PIK3CB MAP3K8 CBLC LAT PAK6 ZAP70 ITK VAV3 CTLA4 ICOS PIK3R2 PLCG1
PANCREATIC_CANCER	0.0016835	0.00849781	0.454398	1.6076	0	68	37	TGFBR2 CCND1 AKT1 PIK3CG TGFA TGFB1 EGFR PIK3R5 RAC2 RB1 RALGDS MAPK3 STAT1 STAT3 RALBP1 NFKB1 AKT3 E2F1 BRAF SMAD3 KRAS BCL2L1 RAC3 RELA CDK4 E2F2 PIK3CB JAK1 RAD51 PLD1 CDK6 VEGFC PIK3R2 TGFBR1 SMAD4 RALB CASP9
ACUTE_MYELOID_LEUKEMIA	0.00664452	0.021559	0.45689	1.56766	3	55	21	KIT CCND1 AKT1 PIK3CG PIK3R5 CEBPA EIF4EBP1 MAPK3 MYC STAT3 NFKB1 AKT3 FLT3 BRAF RUNX1 KRAS PML TCF7 TCF7L1 PIM2 RELA
ADIPOCYTOKINE_SIGNALING_PATHWAY	0.00166389	0.00849781	0.458566	1.62544	0	67	25	LEPR ACSL5 AKT1 TNFRSF1B TNFRSF1A CPT1A ADIPOQ ACSL1 PCK1 ADIPOR2 CAMKK2 IRS2 JAK2 STAT3 NFKB1 AKT3 CD36 SOCS3 PTPN11 NFKBIE TNF PPARGC1A SLC2A1 PCK2 PRKAG2
NOD_LIKE_RECEPTOR_SIGNALING_PATHWAY	0.00338983	0.0123342	0.459568	1.56573	1	53	22	XIAP CCL8 HSP90B1 CASP8 PYCARD CASP1 TNFAIP3 CARD6 MAPK3 CCL5 TRIP6 MAPK11 NFKB1 MAPK13 TAB3 TNF CCL2 PSTPIP1 CCL7 RELA IL18 HSP90AA1
MELANOMA	0.00167785	0.00849781	0.461935	1.62489	0	65	28	PDGFRA CCND1 PDGFC AKT1 IGF1 MET PIK3CG CDH1 EGFR PIK3R5 RB1 HGF MAPK3 AKT3 E2F1 FGF10 BRAF PDGFD KRAS FGF7 PTEN CDK4 E2F2 FGF2 PIK3CB FGF14 CDK6 FGF16
TIGHT_JUNCTION	0.00155763	0.00849781	0.463016	1.79743	0	120	55	ACTN4 CLDN3 ACTN1 CTNNA1 MAGI3 AKT1 CLDN1 PRKCI GNAI3 PRKCB PPP2R1B TJP2 PARD6G CLDN10 HCLS1 GNAI2 CLDN7 CGN CLDN4 MYL12B PPP2R2C CASK ACTG1 MYH10 CLDN8 PPP2R2B RRAS SPTAN1 CLDN22 AKT3 RHOA TJP3 GNAI1 MYH13 CLDN2 TJP1 CTTN KRAS MRAS F11R MYH9 JAM2 SRC PTEN CDK4 PRKCZ MAGI2 PRKCH MYH3 PARD6B OCLN CRB3 EXOC3 CLDN23 CLDN15
P53_SIGNALING_PATHWAY	0.0016835	0.00849781	0.46377	1.61117	0	60	28	IGFBP3 CCND1 IGF1 PERP CCND2 SHISA5 CCND3 THBS1 CASP8 SERPINB5 ATM CASP3 SESN3 APAF1 BID CCNB1 RPRM RRM2 SESN2 CCNG2 PMAIP1 PTEN CDK4 CD82 SESN1 CDK6 GTSE1 SFN
REGULATION_OF_ACTIN_CYTOSKELETON	0.00151286	0.00849781	0.476618	1.96491	0	197	77	ACTN4 MSN ARPC1B PDGFRA ITGA6 ACTN1 PDGFC IQGAP1 NCKAP1 NCKAP1L ITGAM IQGAP2 ITGA4 VAV2 F2R PIK3CG ITGA8 PIP4K2A CFL1 EZR ITGA1 ITGB2 GNG12 GNA13 GNA12 EGFR GSN CYFIP1 PIK3R5 ARPC5 ITGA9 RAC2 CD14 PIKFYVE CSK FGFR2 MYL12B PAK2 MAPK3 ACTG1 FGD3 ITGA2 VAV1 MYH10 FN1 WAS DOCK1 ITGB4 LIMK1 PAK3 RRAS WASF2 ITGB8 RHOA FGF10 ARHGEF12 ITGAX ROCK1 APC BRAF PDGFD MYLK ITGB3 F2 PIP5K1C BAIAP2 KRAS ITGB7 ITG…
CHRONIC_MYELOID_LEUKEMIA	0.00166113	0.00849781	0.477723	1.70851	0	71	30	TGFBR2 CCND1 AKT1 PIK3CG GAB2 TGFB1 PIK3R5 RB1 CBL MAPK3 MYC BCR SHC1 NFKB1 AKT3 E2F1 BRAF RUNX1 HDAC1 SMAD3 PTPN11 KRAS MECOM BCL2L1 RELA CDK4 E2F2 PIK3CB CBLC CDK6
ALDOSTERONE_REGULATED_SODIUM_REABSORPTION	0.010101	0.0289532	0.48302	1.56718	5	41	19	IGF1 HSD11B1 PIK3CG PRKCB ATP1A3 PIK3R5 SCNN1A ATP1B3 MAPK3 ATP1A1 IRS2 NR3C2 FXYD2 KRAS HSD11B2 ATP1A4 PIK3CB FXYD4 SFN
LYSOSOME	0.00156986	0.00849781	0.484849	1.87803	0	118	59	CD68 ARSB GNS GM2A SORT1 ASAH1 CTSH LIPA CTSC CTSB NPC2 LAPTM5 IDS CTSS NAPSA PSAPL1 LGMN ACP5 SLC11A1 PPT1 LAMP2 MAN2B1 AP1M2 NAGA GLB1 HEXB CTSO GALC AP3B1 ATP6V0D2 CTSE ARSA AP3S1 SGSH GNPTAB HGSNAT GALNS ARSG AP1G1 MANBA GUSB SLC17A5 PLA2G15 CTSZ ATP6V0A4 CLTA CTSL HYAL1 GBA CTSW CTNS AP1S3 CLTC M6PR AP3M1 AP1S2 CTSK ATP6V0A2 AP3D1
N_GLYCAN_BIOSYNTHESIS	0.00672269	0.021559	0.48866	1.60859	3	44	16	MAN2A1 STT3A MAN1A2 TUSC3 MAN1C1 GANAB ST6GAL1 MGAT5 MGAT3 ALG10B ALG9 MGAT2 RPN2 STT3B MGAT4A DDOST
APOPTOSIS	0.00165017	0.00849781	0.489833	1.77769	0	79	36	XIAP CSF2RB ENDOD1 AKT1 IL1R1 PRKX RIPK1 TNFRSF1A PIK3CG PRKAR2B CASP8 PIK3R5 IRAK3 IL1RAP CHP2 ATM IRAK2 CASP3 CHP1 IRAK4 CAPN2 MAP3K14 NFKB1 APAF1 BCL2 AKT3 BID CFLAR TNF CASP6 BCL2L1 PRKAR1B RELA PIK3CB MYD88 TNFSF10
SMALL_CELL_LUNG_CANCER	0.00164745	0.00849781	0.498467	1.82634	0	82	43	XIAP LAMB1 CCND1 ITGA6 AKT1 LAMA4 PIK3CG PIK3R5 RB1 CKS1B LAMC2 ITGA2 LAMC3 MYC FN1 NFKB1 APAF1 BCL2 AKT3 E2F1 TRAF1 BCL2L1 TRAF4 COL4A6 ITGA3 TRAF5 PTEN RELA CDK4 E2F2 MAX LAMA3 ITGB1 TRAF3 PIK3CB NOS2 TRAF6 CDK6 LAMC1 PIAS1 LAMB3 PIK3R2 BIRC3
FOCAL_ADHESION	0.00153139	0.00849781	0.500616	2.05327	0	191	80	ACTN4 XIAP LAMB1 PDGFRA CCND1 PARVA ITGA6 ACTN1 COMP PDGFC AKT1 IGF1 MET CAV1 TNC ITGA4 VAV2 THBS4 FYN CCND2 THBS2 LAMA4 PIK3CG ITGA8 RAP1B FLNB PRKCB CCND3 ZYX ITGA1 THBS1 EGFR PIK3R5 ITGA9 RAC2 HGF MYL12B RELN PAK2 PARVG MAPK3 ACTG1 LAMC2 COL6A6 ITGA2 LAMC3 VAV1 FN1 CAV2 DOCK1 ITGB4 PAK3 SHC1 CAPN2 THBS3 FLNA BCL2 ITGB8 AKT3 ARHGAP5 CHAD RHOA ROCK1 FLT4 BRAF PDGFD MYLK ITGB3 COL11A1 PIP5K1C ITG…
NATURAL_KILLER_CELL_MEDIATED_CYTOTOXICITY	0.00163666	0.00849781	0.505308	1.86498	0	88	49	IFNGR1 FCER1G TYROBP VAV2 FYN PIK3CG PRKCB ITGB2 PLCG2 IFNAR2 SYK PIK3R5 RAC2 LCP2 CHP2 PTPN6 CASP3 MAPK3 PTK2B VAV1 CHP1 SH3BP2 CD48 SHC1 GZMB KLRK1 PRF1 BID ICAM1 BRAF LCK PTPN11 TNF KRAS ITGAL NFATC3 RAC3 KLRD1 PIK3CB TNFSF10 ICAM2 LAT ZAP70 IFNAR1 VAV3 SHC3 PIK3R2 PLCG1 FAS
CYTOKINE_CYTOKINE_RECEPTOR_INTERACTION	0.0015015	0.00849781	0.51063	2.11518	0	204	106	IL13RA1 CXCL9 IFNGR1 TGFBR2 KIT PDGFRA LEPR CSF2RB IL6ST PDGFC CCR1 CCR5 IL1R1 MET TNFRSF1B CCL8 TNFRSF1A CSF1R OSMR PRLR PLEKHO2 IL2RG TGFB1 TNFRSF13C IL2RB EGFR IFNAR2 IL1RAP CX3CL1 HGF IL17RA CSF1 CXCL16 IL10RA NGFR PF4 IL17RB TNFSF13B EDA TNFRSF14 CSF2RA CCL5 IL1R2 INHBB IL7R IL7 CXCL12 ACVRL1 IL2RA GDF5 CXCR5 IL10RB BMPR2 FLT3 FLT4 TNF IL18R1 TNFRSF19 BMP7 CCR2 CCL2 CD40 TNFRSF11B CCL7 GHR C…
FC_GAMMA_R_MEDIATED_PHAGOCYTOSIS	0.00163666	0.00849781	0.512342	1.89094	0	88	33	ARPC1B AKT1 NCF1 ASAP1 PLA2G4A LYN VAV2 PIK3CG CFL1 FCGR2B PRKCB GAB2 PLCG2 INPP5D HCK GSN SYK PIK3R5 ARPC5 RAC2 PTPRC PIKFYVE DOCK2 MARCKSL1 MAPK3 VAV1 WAS LIMK1 WASF2 AKT3 ASAP2 WASF3 PIP5K1C
CHEMOKINE_SIGNALING_PATHWAY	0.00153374	0.00849781	0.516888	2.09032	0	164	90	CXCL9 PLCB1 ADCY3 AKT1 NCF1 GNG2 CCR1 CCR5 PRKX CCL8 GNB1 LYN GNAI3 VAV2 PIK3CG RAP1B PRKCB GNG12 PREX1 HCK PIK3R5 GNAI2 RAC2 CX3CL1 DOCK2 CSK ADCY7 CXCL16 PLCB3 FGR PF4 MAPK3 ARRB1 PTK2B STAT1 PLCB4 CCL5 VAV1 WAS SHC1 JAK2 STAT3 CXCL12 NFKB1 CXCR5 AKT3 RHOA ELMO1 GNG10 ROCK1 BRAF GNAI1 FOXO3 GRK5 CCR2 CCL2 KRAS ADCY5 ADCY1 CCL7 CCR6 CXCR2 RELA PRKCZ GNG4 CX3CR1 PIK3CB CXCR3 CCL19 GRK6 PLCB2 XCR1…
AXON_GUIDANCE	0.0015528	0.00849781	0.529027	2.06439	0	125	63	NTN4 SEMA3D SLIT3 MET SEMA4A GNAI3 SEMA3F SRGAP1 FYN SEMA3A CFL1 NTN1 SRGAP3 SEMA5A PLXNB2 GNAI2 RAC2 CHP2 PAK2 PLXNC1 EPHB2 SEMA3E MAPK3 PLXNB1 SEMA3G ROBO1 CHP1 PLXNA2 EFNA4 LIMK1 SEMA4B PAK3 SRGAP2 CXCL12 NTNG1 SLIT2 RHOA EFNB3 ARHGEF12 EFNA5 ROCK1 EPHA3 GNAI1 SEMA3C PLXNA1 NGEF UNC5C KRAS RGS3 NFATC3 PAK4 EFNA3 RAC3 ITGB1 ABLIM1 EPHA4 FES SEMA6B SEMA7A EFNB1 L1CAM PAK6 EPHB6
JAK_STAT_SIGNALING_PATHWAY	0.00155763	0.00849781	0.530855	2.06078	0	120	54	IL13RA1 IFNGR1 LEPR CCND1 CSF2RB IL6ST AKT1 OSMR CCND2 SPRED1 PIK3CG PRLR CCND3 IL2RG IL2RB IFNAR2 PIK3R5 CBL PTPN6 IL10RA STAT1 IRF9 MYC CSF2RA IL7R JAK2 IL7 STAT3 IL13RA2 STAT4 IL2RA IL10RB AKT3 SOCS3 PTPN11 SOCS1 SPRED2 STAT6 BCL2L1 CISH GHR IL5RA IL9R CRLF2 CSF3R PIK3CB SOCS4 JAK1 IL12RB1 IFNLR1 IL21R CBLC IL20RB CNTFR
B_CELL_RECEPTOR_SIGNALING_PATHWAY	0.00166667	0.00849781	0.531216	1.90603	0	73	35	AKT1 PIK3AP1 LYN VAV2 PIK3CG FCGR2B PRKCB PLCG2 CARD11 INPP5D SYK PIK3R5 RAC2 LILRB3 CHP2 PTPN6 BTK IFITM1 MAPK3 CD72 VAV1 CHP1 NFKB1 AKT3 CD81 CD79B NFKBIE CD79A MALT1 KRAS NFATC3 RAC3 RELA CD22 PIK3CB
PATHOGENIC_ESCHERICHIA_COLI_INFECTION	0.00171527	0.00849781	0.531638	1.77709	0	49	19	ARPC1B CLDN1 FYN YWHAQ CDH1 EZR TLR4 TLR5 HCLS1 ARPC5 CD14 ACTG1 WAS NCL TUBA1A TUBB2B RHOA ROCK1 CTTN
ANTIGEN_PROCESSING_AND_PRESENTATION	0.00173611	0.00849781	0.533032	1.69112	0	38	22	B2M CTSB PDIA3 CTSS CIITA CD74 LGMN IFI30 TAP2 TAP1 CREB1 CANX CALR TAPBP NFYA CD4 CD8A CTSL KLRD1 HSP90AA1 PSME1 HSPA1B
LEISHMANIA_INFECTION	0.00172117	0.00849781	0.553299	1.8665	0	52	30	IFNGR1 C3 NCF1 ITGAM ITGA4 PRKCB TLR4 ITGB2 TGFB1 NCF2 PTPN6 MARCKSL1 MAPK3 STAT1 IRAK4 JAK2 MAPK11 NFKB1 CYBA MAPK13 TNF NCF4 RELA ITGB1 TLR2 MYD88 NOS2 ELK1 JAK1 TRAF6
ADHERENS_JUNCTION	0.00166389	0.00849781	0.570801	2.02327	0	67	31	ACTN4 PTPRJ TGFBR2 ACTN1 CTNNA1 IQGAP1 MET PTPRF FYN CDH1 EGFR PTPRM RAC2 PTPN6 MAPK3 ACTG1 SORBS1 WAS PTPRB WASF2 RHOA CTNND1 SMAD3 WASF3 TJP1 PTPN1 BAIAP2 TCF7 TCF7L1 SRC RAC3
ECM_RECEPTOR_INTERACTION	0.00163399	0.00849781	0.576151	2.1143	0	83	40	LAMB1 CD44 ITGA6 COMP TNC ITGA4 THBS4 THBS2 LAMA4 ITGA8 ITGA1 SDC2 THBS1 ITGA9 RELN SDC3 SDC1 LAMC2 COL6A6 ITGA2 LAMC3 FN1 ITGB4 CD47 THBS3 ITGB8 CHAD CD36 SV2B ITGB3 COL11A1 HMMR ITGB7 ITGA11 COL4A6 ITGA3 VWF COL5A2 LAMA3 ITGB1
LEUKOCYTE_TRANSENDOTHELIAL_MIGRATION	0.0015873	0.00849781	0.583538	2.23441	0	109	51	CYBB ACTN4 MSN CLDN3 ACTN1 CTNNA1 NCF1 ITGAM CLDN1 PECAM1 ITGA4 GNAI3 VAV2 PIK3CG RAP1B PRKCB EZR ITGB2 PLCG2 RASSF5 VCAM1 PIK3R5 CLDN10 GNAI2 CLDN7 RAC2 NCF2 CLDN4 MYL12B MMP2 ACTG1 PTK2B THY1 VAV1 CLDN8 MAPK11 CXCL12 CYBA CLDN22 ARHGAP5 RHOA MAPK13 ICAM1 ROCK1 CTNND1 GNAI1 PTPN11 CLDN2 ITGAL NCF4 F11R
STEROID_HORMONE_BIOSYNTHESIS	0.00857633	0.0265866	0.586763	1.69666	4	24	11	HSD17B12 CYP1B1 SRD5A3 HSD11B1 CYP11A1 UGT1A1 HSD11B2 SRD5A1 CYP7B1 SULT2B1 CYP1A1
PRIMARY_IMMUNODEFICIENCY	0.0017094	0.00849781	0.60643	1.88595	0	34	21	CIITA IL2RG TNFRSF13C PTPRC TAP2 BTK TAP1 IL7R CD3D CD4 ADA LCK CD79A CD8A CD40 CD3E TNFRSF13B CD19 ZAP70 ICOS RFX5
O_GLYCAN_BIOSYNTHESIS	0.00344828	0.0123342	0.607023	1.78087	1	26	16	ST3GAL1 GALNT15 GCNT1 C1GALT1 GALNT12 GALNT18 GALNT16 GALNT4 GALNT10 GALNT7 GALNT6 GALNT2 GALNT5 GCNT4 GCNT3 GALNT3
AUTOIMMUNE_THYROID_DISEASE	0.0136519	0.0378992	0.623717	1.61679	7	16	11	TSHR GZMB CD86 PRF1 CD40 CTLA4 FAS CD80 TG CD28 IL10
CELL_ADHESION_MOLECULES_CAMS	0.00158479	0.00849781	0.657907	2.50259	0	103	67	NEGR1 CLDN3 ITGA6 ALCAM ITGAM CLDN1 PTPRF PECAM1 ITGA4 CADM3 SIGLEC1 ITGA8 SELPLG CDH1 SELP ITGB2 SDC2 VCAM1 PTPRM CLDN10 CD34 CLDN7 ITGA9 VCAN PTPRC GLG1 CLDN4 SDC3 SPN SDC1 CD274 CLDN8 SELL NRCAM CD86 CLDN22 ITGB8 CD2 ICAM1 CDH3 CD4 CD6 CLDN2 CD8A NCAM1 CD40 ITGB7 ITGAL F11R CD226 CNTN1 JAM2 PDCD1 NRXN1 ITGB1 MPZL1 SELE CD22 CDH2 CD276 PDCD1LG2 OCLN SDC4 CLDN23 CNTN2 CLDN15 ICAM2
HEMATOPOIETIC_CELL_LINEAGE	0.0016835	0.00849781	0.684835	2.41468	0	66	41	MME KIT CD44 ITGA6 ITGAM IL1R1 ITGA4 CSF1R CD33 CD9 ANPEP ITGA1 CD34 CD14 CSF1 CD38 MS4A1 CD37 ITGA2 CSF2RA IL1R2 IL7R CD3D IL7 IL2RA CD36 CD2 CD4 FLT3 ITGB3 TNF CD8A CD3E CD3G CD5 ITGA3 GYPA IL5RA IL9R CSF3R CD22
COMPLEMENT_AND_COAGULATION_CASCADES	0.00169205	0.00849781	0.689703	2.40226	0	62	37	CFH C3 C2 PROS1 SERPING1 CFB C1S C1QB PLAT C6 C1QA C1QC F2R F13A1 C3AR1 C4B MASP1 C7 F8 TFPI CFD FGB PLG FGA KNG1 FGG SERPINC1 C5AR1 F3 CFI F2 THBD PLAUR A2M VWF SERPINF2 F10
GLYCOSAMINOGLYCAN_DEGRADATION	0.0017301	0.00849781	0.696378	1.92089	0	20	13	ARSB GNS IDS HPSE GLB1 HEXB HS3ST3B1 SGSH HGSNAT GALNS GUSB HS3ST3A1 HYAL1
SPHINGOLIPID_METABOLISM	0.00171233	0.00849781	0.697331	2.15618	0	33	23	SGPL1 SGMS2 ASAH1 ASAH2 SPTLC2 SMPD3 ACER2 CERK B4GALT6 GLB1 GALC SGPP1 ARSA ACER3 DEGS1 SGPP2 SGMS1 SPTLC1 UGCG SPHK1 KDSR GBA ACER1
RENIN_ANGIOTENSIN_SYSTEM	0.00169779	0.00849781	0.81424	2.02784	0	14	8	MME ENPEP NLN ACE CMA1 ANPEP CPA3 LNPEP
pathway_GO:BP	pval	padj	ES	NES	nMoreExtreme	size	no.leadingedge gene	leadingEdge
RESPONSE_TO_PHEROMONE	0.00835073	0.039979	-0.984592	-1.46355	3	2	1	GPR180
MITOCHONDRIAL_ELECTRON_TRANSPORT_UBIQUINOL_TO_CYTOCHROME_C	0.00229885	0.0174409	-0.963632	-2.35947	0	11	10	UQCRB UQCR10 UQCRH UQCR11 UQCRQ UQCRFS1 CYCS UQCRC2 UQCRC1 CYC1
REGULATION_OF_POLYAMINE_TRANSMEMBRANE_TRANSPORT	0.00222717	0.0170963	-0.939489	-1.74315	0	4	2	OAZ2 OAZ1
2FE_2S_CLUSTER_ASSEMBLY	0.00668151	0.0335859	-0.911034	-1.69035	2	4	4	NFS1 GLRX3 BOLA2 HSCB
GLYCOSIDE_METABOLIC_PROCESS	0.00444444	0.025127	-0.902291	-1.78374	1	5	2	AKR1B10 CBR4
BLEB_ASSEMBLY	0.00176367	0.0138825	0.832313	1.9703	0	11	11	EMP1 LPAR1 EMP2 P2RX7 ANO6 LPAR3 EMP3 ROCK1 PMP22 MYLK ANLN
PROTEIN_INSERTION_INTO_MITOCHONDRIAL_INNER_MEMBRANE	0.00228311	0.0173393	-0.884254	-2.08105	0	9	6	NDUFA13 ROMO1 TIMM22 TIMM9 TIMM10 TIMM13
POLYAMINE_TRANSPORT	0.00232019	0.0175303	-0.882242	-1.85206	0	6	3	OAZ2 OAZ1 TAF7
PROTEIN_MATURATION_BY_IRON_SULFUR_CLUSTER_TRANSFER	0.00228311	0.0173393	-0.880152	-2.07139	0	9	8	CISD3 ISCA1 GLRX3 ISCA2 BOLA2 HSCB CIAO1 NFU1
REGULATION_OF_MEMBRANE_INVAGINATION	0.00178253	0.0139436	0.816231	2.10864	0	15	11	PPARG C3 NCKAP1L RAB31 CD300A F2RL1 ALOX15 STAP1 ITGA2 ANO6 CD36
CHOLESTEROL_STORAGE	0.00181818	0.0140407	0.792499	2.10408	0	17	11	PPARG TTC39B SOAT1 ABCA1 SREBF2 MSR1 APOB EHD1 STARD4 ABCG1 CD36
ISOCITRATE_METABOLIC_PROCESS	0.00444444	0.025127	-0.869455	-1.71882	1	5	4	IDH3B IDH2 IDH3G ACO2
ENERGY_COUPLED_PROTON_TRANSPORT_DOWN_ELECTROCHEMICAL_GRADIENT	0.00444444	0.025127	-0.868026	-1.716	1	5	4	COX5B CYC1 VPS9D1 STOML2
MITOCHONDRIAL_ACETYL_COA_BIOSYNTHETIC_PROCESS_FROM_PYRUVATE	0.00232019	0.0175303	-0.867744	-1.82163	0	6	6	MPC1 MPC2 PDHX PDHA1 PDHB DLD
PROTEIN_REPAIR	0.00232019	0.0175303	-0.865601	-1.81713	0	6	5	PARK7 MSRB1 MSRB3 MSRB2 PCMT1
RESPONSE_TO_INTERFERON_ALPHA	0.00175747	0.0138825	0.777941	2.16608	0	20	12	AXL IFITM2 GAS6 IFITM3 IFIT2 TPR IFNAR2 BST2 PYHIN1 IFITM1 ADAR EIF2AK2
POSITIVE_REGULATION_OF_CYCLIC_NUCLEOTIDE_PHOSPHODIESTERASE_ACTIVITY	0.0111359	0.0490887	-0.858261	-1.59244	4	4	3	CALM1 CALM3 CALM2
PEPTIDYL_ASPARTIC_ACID_MODIFICATION	0.00888889	0.0420077	-0.847226	-1.67488	3	5	1	ASPH
FATTY_ACID_BETA_OXIDATION_USING_ACYL_COA_DEHYDROGENASE	0.002331	0.0175759	-0.847078	-2.02772	0	10	8	ACADS ETFDH ACADVL ETFA ACADM GCDH ETFB ACADL
PROTEIN_DE_ADP_RIBOSYLATION	0.0111111	0.049009	-0.844233	-1.66896	4	5	5	MACROD1 ADPRHL1 MACROD2 OARD1 ADPRH
RESPONSE_TO_PROTOZOAN	0.0018018	0.0139436	0.76767	2.01747	0	16	13	IRF4 CLEC7A SLC11A1 PF4 CCDC88B IRF8 VTCN1 BCL3 BATF2 ARG1 CD40 TSPAN32 LYST
RIBOSOME_DISASSEMBLY	0.00232019	0.0175303	-0.839536	-1.88448	0	8	8	MCTS1 EIF2D GFM2 PELO DENR MRRF MTIF2 MTIF3
RENAL_FILTRATION	0.00356506	0.020734	0.757068	1.9558	1	15	12	SULF2 GAS6 F2R SULF1 EMP2 F2RL1 MYO1E CD34 CYBA XPNPEP3 GJA5 ITGA3
CHEMOKINE_SECRETION	0.0018018	0.0139436	0.752375	1.91021	0	14	13	POSTN MBP CSF1R F2RL1 PYCARD IL33 TNF IL1RL1 MCOLN2 FOXP1 AIF1 LPL LRP1
REGULATION_OF_MICROGLIAL_CELL_ACTIVATION	0.00178891	0.0139436	0.745723	2.04411	0	19	15	ITGAM APP GRN C1QA ITGB2 PTPRC CX3CL1 ATM LRRK2 STAP1 C5AR1 TNF TREM2 LDLR TTBK1
HYALURONAN_CATABOLIC_PROCESS	0.00540541	0.0283755	0.739987	1.87876	2	14	11	LYVE1 CD44 TGFB1 HEXB CHP1 STAB2 HMMR GUSB HYAL1 FGF2 SLC9A1
REGULATION_OF_NEUROINFLAMMATORY_RESPONSE	0.00167504	0.0135741	0.735557	2.22083	0	29	23	ITGAM IGF1 APP TNFRSF1B GRN C1QA ITGB2 PTPRC CX3CL1 ATM LRRK2 STAP1 CD200R1 MMP3 C5AR1 IL33 TNF TREM2 LDLR IL18 TTBK1 MMP8 MMP9
MITOCHONDRIAL_RESPIRATORY_CHAIN_COMPLEX_III_ASSEMBLY	0.00464037	0.0259946	-0.821697	-1.72496	1	6	3	UQCRB UQCR10 TTC19
REGULATION_OF_SYSTEMIC_ARTERIAL_BLOOD_PRESSURE_BY_RENIN_ANGIOTENSIN	0.00175747	0.0138825	0.735526	2.04798	0	20	14	MME ENPEP ACE F2R CMA1 PCSK5 F2RL1 CPA3 CYBA RHOA CTSZ GJA5 SERPINF2 AGT
REGULATION_OF_B_CELL_DIFFERENTIATION	0.00166389	0.0135741	0.732387	2.18926	0	27	17	SFRP1 NCKAP1L MMP14 CARD11 NFAM1 INPP5D SYK TLR9 ZFP36L2 IKZF3 PTPRC PTPN6 BTK SLAMF8 ATP11C ID2 ZFP36L1
PROTEIN_DENEDDYLATION	0.002331	0.0175759	-0.807588	-1.93319	0	10	8	COPS5 COPS3 COPS7A COPS4 COPS2 COPS7B COPS8 COPS6
QUINONE_BIOSYNTHETIC_PROCESS	0.00223714	0.0170963	-0.806035	-2.09411	0	14	9	COQ9 COQ10A COQ7 NDUFA9 COQ2 COQ3 COQ6 COQ5 PDSS2
POSITIVE_REGULATION_OF_VASCULAR_ENDOTHELIAL_GROWTH_FACTOR_PRODUCTION	0.0016835	0.0135741	0.720924	2.13876	0	26	16	SULF2 C3 IL6ST CYP1B1 SULF1 HPSE C3AR1 TGFB1 EIF2AK3 CCBE1 ADORA2B C5AR1 HIF1A FLT4 RORA BRCA1
REGULATION_OF_HETEROTYPIC_CELL_CELL_ADHESION	0.00169492	0.0135741	0.719679	2.10246	0	24	15	CD44 MBP GCNT2 ADIPOQ APOA1 ALOX15 FGB FGA MYADM THY1 FGG IL1RN LCK TNF BMP7
NEURON_FATE_DETERMINATION	0.00928074	0.0431378	-0.802013	-1.80025	3	8	2	HES1 LBX1
PROTEIN_LIPOYLATION	0.00947867	0.0437807	-0.796417	-1.75134	3	7	6	NDUFAB1 GCSH GLRX5 LIPT2 LIPT1 LIAS
POSITIVE_REGULATION_OF_EXTRINSIC_APOPTOTIC_SIGNALING_PATHWAY_VIA_DEATH_DOMAIN_RECEPTORS	0.00540541	0.0283755	0.717882	1.82264	2	14	11	SFRP1 TIMP3 THBS1 STK4 STK3 SKIL MAL PMAIP1 PTEN BMPR1B ATF3
REGULATION_OF_MACROPHAGE_DIFFERENTIATION	0.00172117	0.0136948	0.715368	2.03442	0	21	11	RIPK1 C1QC TGFB1 ADIPOQ CASP8 HCLS1 RB1 CSF1 PF4 ID2 ROR2
TOLERANCE_INDUCTION	0.00172117	0.0136948	0.714388	2.03163	0	21	13	TGFBR2 LYN TGFB1 LGALS9 IRAK3 TNFAIP3 CD274 IL2RA HAVCR2 ITCH CD3E PDCD1 IDO1
REGULATION_OF_SYSTEMIC_ARTERIAL_BLOOD_PRESSURE_BY_HORMONE	0.00165563	0.0135741	0.713687	2.2044	0	32	21	MME ENPEP ACE F2R CMA1 OXTR PCSK5 F2RL1 AVPR1A CPA3 EDN1 CYBA RHOA ECE1 CTSZ GJA5 EDN3 SERPINF2 AGT HSD11B2 NOS3
PROTEIN_COFACTOR_LINKAGE	0.00689655	0.0344781	-0.764185	-1.87112	2	11	8	NDUFAB1 SDHAF2 GCSH GLRX5 LIPT2 HMBS LIPT1 LIAS
GTP_BIOSYNTHETIC_PROCESS	0.00932401	0.0431813	-0.764147	-1.8292	3	10	4	NME2 NME6 NME1 NME7
CHAPERONE_MEDIATED_PROTEIN_TRANSPORT	0.00932401	0.0431813	-0.760025	-1.81933	3	10	6	TIMM8B TIMM9 TIMM10 TIMM13 HSPA8 BAG3
EMBRYONIC_PLACENTA_MORPHOGENESIS	0.00168634	0.0135741	0.712941	2.0691	0	23	15	ST14 ADM FGFR2 ZFP36L1 WNT7B RSPO3 SPINT1 SPINT2 CDKN1C GRHL2 SOCS3 BMP7 SETD2 IGF2 BMP5
GUANOSINE_CONTAINING_COMPOUND_BIOSYNTHETIC_PROCESS	0.00224719	0.0171553	-0.758181	-1.92201	0	12	5	NME2 NME6 NME1 GUK1 NME7
CELLULAR_RESPONSE_TO_LIPOPROTEIN_PARTICLE_STIMULUS	0.00166389	0.0135741	0.712654	2.17317	0	30	23	APOE CD68 PPARG AKT1 FCER1G CD9 SMPD3 TLR4 ABCA1 ITGB2 ADTRP SYK SREBF2 ABCG1 CD36 CD81 CASR LDLR ITGB1 MYD88 LPL TLR6 ADAM17
NEGATIVE_REGULATION_OF_LIPASE_ACTIVITY	0.0036036	0.0207718	0.7126	1.87275	1	16	11	APOC1 POR ANXA8 SORT1 ANXA1 RGS2 APOA1 BICD1 ANGPTL4 APOA2 APOC3
POSITIVE_REGULATION_OF_NEUROINFLAMMATORY_RESPONSE	0.0036036	0.0207718	0.712334	1.87205	1	16	13	ITGAM APP C1QA ITGB2 LRRK2 STAP1 IL33 TNF TREM2 IL18 TTBK1 MMP8 CCL3
CELLULAR_RESPONSE_TO_LOW_DENSITY_LIPOPROTEIN_PARTICLE_STIMULUS	0.00357143	0.020734	0.712237	1.92344	1	18	13	PPARG FCER1G CD9 ABCA1 ITGB2 SYK SREBF2 CD36 CD81 CASR LDLR ITGB1 LPL
REGULATION_OF_MACROPHAGE_DERIVED_FOAM_CELL_DIFFERENTIATION	0.00168067	0.0135741	0.710588	2.10034	0	25	16	PPARG ABCA1 ADIPOQ MSR1 CSF1 APOB PF4 ABCA5 ABCG1 NFKB1 CD36 ITGB3 IL18 AGT PRKCH LPL
PODOSOME_ASSEMBLY	0.00178891	0.0139436	0.709795	1.94562	0	19	12	MSN SH3PXD2B ASAP1 HCK LCP1 GSN BIN2 DBNL RHOA TNF SRC ARHGEF5
LABYRINTHINE_LAYER_MORPHOGENESIS	0.00178891	0.0139436	0.708485	1.94203	0	19	12	ST14 ADM FGFR2 ZFP36L1 WNT7B RSPO3 SPINT1 SPINT2 GRHL2 SOCS3 BMP7 BMP5
MYOSIN_FILAMENT_ORGANIZATION	0.00674157	0.0338605	-0.725849	-1.84005	2	12	6	TCAP MYBPC1 TTN OBSL1 MYOM3 MYBPC2
NEGATIVE_REGULATION_OF_TISSUE_REMODELING	0.00357143	0.020734	0.707347	1.91023	1	18	12	SFRP1 INPP5D P2RX7 TNFAIP3 CSK CD38 BCR UBASH3B TNFRSF11B AGT GREM1 ABR
CELL_DIFFERENTIATION_INVOLVED_IN_EMBRYONIC_PLACENTA_DEVELOPMENT	0.00168634	0.0135741	0.704819	2.04553	0	23	14	AKT1 ST14 KRT19 CASP8 E2F8 SPINT2 KRT8 STK4 GRHL2 SOCS3 STK3 EOMES PLK4 PRDM1
FOAM_CELL_DIFFERENTIATION	0.00166389	0.0135741	0.704485	2.14826	0	30	19	PPARG SOAT1 ABCA1 TGFB1 ADIPOQ MSR1 CSF1 APOB PF4 STAT1 ABCA5 ABCG1 NFKB1 CD36 ITGB3 IL18 AGT PRKCH LPL
REGULATION_OF_MAST_CELL_ACTIVATION_INVOLVED_IN_IMMUNE_RESPONSE	0.00169492	0.0135741	0.699909	2.0447	0	24	15	FCER1G LYN ENPP3 GAB2 CD300A LGALS9 SYK RAC2 ADORA2B STXBP2 STXBP1 CD84 FGR IL13RA2 HMOX1
NEGATIVE_REGULATION_OF_REGULATED_SECRETORY_PATHWAY	0.00172117	0.0136948	0.697755	1.98433	0	21	16	RAP1B FCGR2B CD300A LGALS9 GNAI2 CD84 CEACAM1 BCR IL13RA2 BRAF HMOX1 FMR1 CCR2 ABR NOTCH1 ADRA2A
ADRENAL_GLAND_DEVELOPMENT	0.00168634	0.0135741	0.69629	2.02078	0	23	11	PDGFRA ARID5B PBX1 APOA1 STRA6 WT1 MDK TSPO CDKN1C SMAD3 SALL1
ANIMAL_ORGAN_MATURATION	0.00172117	0.0136948	0.695733	1.97858	0	21	14	IGF1 PLXNB1 ALDH1A2 ANO6 THBS3 RHOA PAX2 RET LTF FGFR3 DCHS1 GATA3 GREM1 XYLT1
ALPHA_BETA_T_CELL_LINEAGE_COMMITMENT	0.00357143	0.020734	0.691207	1.86664	1	18	13	IRF4 LY9 SPN STAT3 BCL2 RHOA LOXL3 SLAMF6 STAT6 IL12RB1 TBX21 BATF ZFPM1
3_UTR_MEDIATED_MRNA_STABILIZATION	0.00907029	0.0424012	-0.691925	-1.84589	3	15	9	TARDBP ELAVL1 RBM24 MAPK14 RBM38 MAPKAPK2 HNRNPC TIRAP DAZL
POSITIVE_REGULATION_OF_INTERLEUKIN_6_SECRETION	0.00169492	0.0135741	0.688516	2.01142	0	24	12	TLR8 MBP F2R DHX9 IL17RC LGALS9 F2RL1 PYCARD IFIH1 IL1RAP DDX58 TRPV4
ASTROCYTE_ACTIVATION	0.00175747	0.0138825	0.686258	1.9108	0	20	15	APP GRN C1QA SMO EGFR PSEN1 BACE2 C5AR1 TNF TREM2 LDLR FPR2 TTBK1 LRP1 ADORA2A
TRNA_5_END_PROCESSING	0.00907029	0.0424012	-0.684754	-1.82676	3	15	9	RPP21 POP5 RPP30 TRMT10C RPP14 USP14 RPP38 POP7 RPP40
POSITIVE_REGULATION_OF_LEUKOCYTE_DEGRANULATION	0.00357143	0.020734	0.686095	1.85284	1	18	12	ITGAM FCER1G PTAFR GAB2 ITGB2 F2RL1 SYK ADORA2B STXBP1 FGR AP1G1 CD177
REGULATION_OF_MAST_CELL_ACTIVATION	0.00167224	0.0135741	0.685563	2.12817	0	33	24	FCER1G LYN ENPP3 GAB2 CD300A LGALS9 SYK RAC2 ADORA2B STXBP2 STXBP1 CD84 FGR CD300LF IL13RA2 HMOX1 CNR2 NR4A3 CD226 PLSCR1 MILR1 CNR1 CRLF2 FES
REVERSE_CHOLESTEROL_TRANSPORT	0.00720721	0.0356429	0.685524	1.80159	3	16	12	APOE ABCA1 APOA1 LIPG ABCA5 APOA2 ABCG1 APOC3 CLU LIPC APOC2 APOA5
2_OXOGLUTARATE_METABOLIC_PROCESS	0.00907029	0.0424012	-0.677873	-1.80841	3	15	9	MRPS36 PHYH GOT1 IDH2 L2HGDH DLST GOT2 DLD OGDH
HOMEOSTASIS_OF_NUMBER_OF_CELLS_WITHIN_A_TISSUE	0.00164745	0.0135741	0.684969	2.06783	0	28	21	ILDR2 LIPA F2R SMO SASH3 P2RX7 ADD1 CSF1 IL7 BCL2 AKT3 PTPN11 CCR2 KRAS CORO1A RAC3 NOS3 IL20RB NOTCH1 GATA1 GATA2
HUMORAL_IMMUNE_RESPONSE_MEDIATED_BY_CIRCULATING_IMMUNOGLOBULIN	0.00166945	0.0135741	0.684497	2.18332	0	38	19	C3 C2 SERPING1 C1S C1QB C6 C1QA C1QC FCGR2B C4B C1RL C7 HPX PTPRC PTPN6 BCL3 CD81 CFI TNF
EPITHELIAL_CELL_MORPHOGENESIS	0.00167224	0.0135741	0.684122	2.12369	0	33	23	CLIC4 HEG1 CLDN3 ST14 MET PECAM1 TNMD FLNB POF1B FAT1 COL23A1 COL18A1 STC1 RAB25 SPINT2 BCL11B GRHL2 ROCK1 HRH2 FRMD6 IHH ARHGEF26 PALLD
REGULATION_OF_OXIDATIVE_PHOSPHORYLATION	0.00733496	0.0361045	-0.646451	-1.92073	2	23	10	COX7A2 COX7A1 VCP PPIF COX7A2L DNAJC15 PARK7 MLXIPL PGK1 PINK1
REGULATION_OF_LEUKOCYTE_DEGRANULATION	0.00164745	0.0135741	0.683608	2.1673	0	36	23	ITGAM FCER1G LYN PTAFR FCGR2B GAB2 ITGB2 CD300A LGALS9 F2RL1 SYK RAC2 ADORA2B STXBP2 STXBP1 CD84 CEACAM1 FGR BCR IL13RA2 HMOX1 AP1G1 CCR2
REGULATION_OF_MYELOID_LEUKOCYTE_MEDIATED_IMMUNITY	0.00165017	0.0135741	0.682978	2.26021	0	44	27	C3 ITGAM FCER1G LYN PTAFR FCGR2B DNASE1L3 GAB2 ITGB2 CD300A LGALS9 F2RL1 SYK RAC2 ADORA2B STXBP2 DDX58 STXBP1 CD84 BTK FGR BCR IL13RA2 HMOX1 ARG1 CCR2 DDX21
MUCOPOLYSACCHARIDE_METABOLIC_PROCESS	0.00178891	0.0139436	0.680613	1.86563	0	19	13	DCN BGN AKT1 ITIH2 ITIH5 HGF DSEL CHST1 ITIH3 ITIH4 NDNF HYAL1 ITIH1
EMBRYONIC_DIGESTIVE_TRACT_MORPHOGENESIS	0.00357143	0.020734	0.679809	1.83586	1	18	11	PDGFRA SHOX2 FGFR2 RBPMS2 NIPBL ID2 GLI3 FGF10 TCF21 TCF7 IHH
POSITIVE_REGULATION_OF_PHAGOCYTOSIS	0.00163399	0.0135741	0.678522	2.36087	0	60	33	PTPRJ PPARG C3 C2 GAS6 MERTK NCKAP1L FCER1G CAMK1D RAB31 AHSG FCGR2B C4B IL2RG SIRPA IL2RB SLC11A1 F2RL1 PYCARD APOA1 PTPRC DOCK2 STAP1 CD300LF ITGA2 LMAN2 CALR ANO6 BCR APOA2 CD47 CYBA CD36
HETEROTYPIC_CELL_CELL_ADHESION	0.00164204	0.0135741	0.678483	2.32945	0	56	32	DSP PARVA CD44 CXADR MBP ITGA4 PERP GCNT2 ITGB2 ADIPOQ SIRPA VCAM1 DSG2 APOA1 ALOX15 PTPRC FGB FGA MYADM THY1 CD200R1 FGG NRCAM CD47 CD2 ITGAX IL1RN LCK ITGB3 TNF BMP7 ITGB7
NEGATIVE_REGULATION_OF_EXOCYTOSIS	0.00166389	0.0135741	0.678093	2.02697	0	27	20	ANXA1 RAP1B FCGR2B CD300A LGALS9 GNAI2 CD84 STXBP6 CEACAM1 BCR IL13RA2 BRAF HMOX1 FMR1 CCR2 VPS4B ABR NOTCH1 ADRA2A SNCA
POSITIVE_REGULATION_OF_STEROL_TRANSPORT	0.00172117	0.0136948	0.678074	1.92836	0	21	11	APOE ABCA1 ADIPOQ ANXA2 PLTP APOA1 LIPG PON1 ABCG1 ABCA12 PTCH1
CD4_POSITIVE_ALPHA_BETA_T_CELL_LINEAGE_COMMITMENT	0.00900901	0.0422761	0.677953	1.78169	4	16	11	IRF4 LY9 SPN STAT3 LOXL3 SLAMF6 STAT6 IL12RB1 TBX21 BATF ZFPM1
DENDRITIC_CELL_DIFFERENTIATION	0.00164745	0.0135741	0.677121	2.14673	0	36	22	AXL TGFBR2 GAS6 TMEM176B IRF4 LYN FCGR2B TMEM176A TGFB1 LGALS9 UBD F2RL1 PSEN1 RBPJ FLT3 BATF2 TRPM2 TREM2 AZI2 TRAF6 CCL19 BATF
REGULATION_OF_TYPE_2_IMMUNE_RESPONSE	0.0016835	0.0135741	0.676784	2.00781	0	26	16	ANXA1 RSAD2 CD74 ECM1 CD86 IL33 ARG1 CCR2 IL27RA STAT6 IL18 PRKCZ IDO1 GATA3 ARG2 TBX21
INTERLEUKIN_6_SECRETION	0.00163132	0.0135741	0.676598	2.143	0	35	17	GAS6 TLR8 MBP F2R DHX9 IL17RC PTPN22 LGALS9 F2RL1 PYCARD IFIH1 IL1RAP DDX58 TRPV4 C1QTNF3 CD200R1 BANK1
RESPONSE_TO_PLATELET_DERIVED_GROWTH_FACTOR	0.00357782	0.0207384	0.67572	1.85222	1	19	13	IQGAP1 FYN CORO1B ATP7A CBL CCNA2 CREB1 PTN ERRFI1 PDGFD HAS1 SRC HYAL1
POSITIVE_REGULATION_OF_MYELOID_LEUKOCYTE_MEDIATED_IMMUNITY	0.00168067	0.0135741	0.675629	1.99701	0	25	16	C3 ITGAM FCER1G PTAFR GAB2 ITGB2 F2RL1 SYK ADORA2B DDX58 STXBP1 BTK FGR ARG1 DDX21 CD177
REGULATION_OF_EPITHELIAL_CELL_DIFFERENTIATION_INVOLVED_IN_KIDNEY_DEVELOPMENT	0.00909091	0.0424165	0.675527	1.79352	4	17	12	PRKX ADIPOQ OSR1 WWTR1 STAT1 PAX2 GDNF PROM1 CITED1 GATA3 MMP9 PAX8
NEGATIVE_REGULATION_OF_KIDNEY_DEVELOPMENT	0.0108108	0.0479517	0.675159	1.77435	5	16	12	TACSTD2 ADIPOQ OSR1 WT1 STAT1 PAX2 BMP7 CITED1 GATA3 MMP9 HNF1B PAX8
NEUROINFLAMMATORY_RESPONSE	0.00166945	0.0135741	0.674285	2.28908	0	53	39	TLR8 ITGAM IGF1 TLR7 APP TNFRSF1B GRN TYROBP C1QA ITGB2 SMO EGFR PSEN1 PTPRC CX3CL1 ATM LRRK2 TLR3 STAP1 CD200R1 MMP3 BACE2 C5AR1 IL33 TNF TREM2 ADCY1 LDLR FPR2 IL18 TTBK1 TLR2 AIF1 MMP8 LRP1 MMP9 TLR6 CLU ADORA2A
CELL_CELL_ADHESION_MEDIATED_BY_INTEGRIN	0.0108108	0.0479517	0.671585	1.76496	5	16	15	DPP4 ITGA4 SWAP70 FERMT3 CCL5 ADA CD3E NPNT PODXL ITGB1 WNK1 CXCL13 PIEZO1 SKAP1 ITGA5
RRNA_MODIFICATION	0.0074813	0.0368002	-0.584845	-1.82029	2	27	9	EMG1 NSUN4 NOP10 RRNAD1 NAT10 TSR3 TRMT112 TFB1M MRM1
PROTEIN_ACTIVATION_CASCADE	0.00164745	0.0135741	0.670874	2.02528	0	28	16	FBLN1 SERPING1 F13A1 PRCP F8 TFPI FGB FGA KNG1 FGG SERPINC1 F3 F2 A2M VWF F10
SUPEROXIDE_ANION_GENERATION	0.00168919	0.0135741	0.668983	2.04783	0	31	22	CYBB NOX4 NCF1 ITGAM TYROBP GNAI3 ITGB2 TGFB1 ACP5 EGFR F2RL1 SYK GNAI2 NCF2 DUOX2 EDN1 CYBA CD177 FPR2 AGT DUOX1 PON3
NEGATIVE_REGULATION_OF_LIPID_LOCALIZATION	0.00166113	0.0135741	0.666294	2.14211	0	39	16	APOC1 PPARG TTC39B AKT1 PNPLA2 ABCA1 THBS1 SREBF2 IRS2 APOA2 ABCG1 NFKB1 APOC3 ITGB3 PTPN11 TNF
NEGATIVE_REGULATION_OF_REACTIVE_OXYGEN_SPECIES_BIOSYNTHETIC_PROCESS	0.0016835	0.0135741	0.66559	1.9746	0	26	12	PTGIS CAV1 ABCD2 FYN SIRPA ACP5 CD34 ATP2B4 STAT3 TSPO RHOA CFLAR
POSITIVE_REGULATION_OF_ALPHA_BETA_T_CELL_PROLIFERATION	0.00909091	0.0424165	0.665387	1.7666	4	17	12	TGFBR2 LGALS9 SYK PTPRC CCR2 CD3E IL18 BLM RASAL3 EBI3 ZAP70 RIPK2
PEPTIDE_CROSS_LINKING	0.00168634	0.0135741	0.665257	2.10453	0	37	14	DCN DSP BGN ANXA1 F13A1 TGM2 THBS1 KRT10 KRT1 EVPL FN1 LOR SPRR1A TGM1
POSITIVE_REGULATION_OF_GRANULOCYTE_CHEMOTAXIS	0.00351494	0.0206907	0.66505	1.85175	1	20	11	NCKAP1L CAMK1D THBS4 C3AR1 CD74 RAC2 LBP MOSPD2 EDN1 S100A14 C5AR1
REGULATION_OF_RENAL_SYSTEM_PROCESS	0.0016835	0.0135741	0.66388	1.96953	0	26	16	GAS6 F2R ADIPOQ EMP2 F2RL1 GNAI2 AVPR1A STC1 EDN1 EDNRB CYBA GJA5 AGT NPR1 PTPRO ADORA2A
UNSATURATED_FATTY_ACID_BIOSYNTHETIC_PROCESS	0.00163132	0.0135741	0.663458	2.10138	0	35	19	FADS1 PTGIS ANXA1 ELOVL5 FADS2 ABCD2 ELOVL4 CD74 TBXAS1 FABP5 AVPR1A HPGDS ELOVL6 EDN1 PTGS1 ELOVL1 FADS3 PTGES DEGS1
REGULATION_OF_B_CELL_RECEPTOR_SIGNALING_PATHWAY	0.00168067	0.0135741	0.663257	1.96044	0	25	19	LYN FCGR2B PRKCB CMTM3 CD300A PTPN22 NFAM1 PTPRC PTPN6 ELF1 STAP1 BLK PAX5 RUNX1 SLC39A10 PRKCH CD22 FOXP1 CD19
CELLULAR_EXTRAVASATION	0.00163666	0.0135741	0.663247	2.25489	0	52	38	PLCB1 GCNT1 IL1R1 PECAM1 ITGA4 PTAFR PIK3CG SELPLG SELP ITGA1 ITGB2 SIRPA PLVAP BST1 VCAM1 CX3CL1 SPN ADAM8 THY1 BCR SELL CXCL12 CD47 ICAM1 ROCK1 PDGFD RIPK3 TNF CCR2 CCL2 ITGB7 CD177 ITGB1 CX3CR1 SELE ADD2 ABR PTGER4
MAST_CELL_ACTIVATION	0.00165289	0.0135741	0.662101	2.24029	0	50	32	KIT FCER1G NDRG1 LYN PIK3CG ENPP3 GAB2 CPLX2 CD300A LGALS9 SYK RAC2 ADORA2B LCP2 CBL STXBP2 STXBP1 CD84 BTK FGR CD300LF IL13RA2 RASGRP1 HMOX1 CNR2 NR4A3 CD226 PLSCR1 MILR1 CNR1 CRLF2 FES
VASCULAR_ENDOTHELIAL_GROWTH_FACTOR_PRODUCTION	0.00168919	0.0135741	0.662027	2.02654	0	31	18	SULF2 C3 IL6ST CYP1B1 SULF1 HPSE C3AR1 TGFB1 EIF2AK3 CCBE1 ADORA2B ADAMTS3 C5AR1 HIF1A FLT4 RORA CCR2 BRCA1
COMPLEMENT_ACTIVATION	0.00166389	0.0135741	0.661864	2.26204	0	55	26	CFH C3 C2 PROS1 SERPING1 CFB SCARA3 C1S C1QB C6 C1QA C1QC C3AR1 C4B MASP1 C1RL C7 CFD CFP KRT1 VSIG4 C5AR1 CD81 CFI F2 CPN2
GLIAL_CELL_ACTIVATION	0.00163934	0.0135741	0.661803	2.17199	0	43	32	TLR8 ITGAM TLR7 APP GRN TYROBP C1QA ITGB2 SMO EGFR PSEN1 PTPRC CX3CL1 ATM LRRK2 TLR3 STAP1 BACE2 C5AR1 IL33 TNF TREM2 LDLR FPR2 TTBK1 TLR2 AIF1 MMP8 LRP1 TLR6 CLU ADORA2A
MYELOID_DENDRITIC_CELL_ACTIVATION	0.0016835	0.0135741	0.660996	1.96097	0	26	17	TGFBR2 IRF4 TGFB1 UBD PYCARD PSEN1 DOCK2 RBPJ KLRK1 CD2 BATF2 HAVCR2 TSPAN32 TRAF6 BATF CLEC4D SLAMF1
POSITIVE_REGULATION_OF_SMOOTH_MUSCLE_CONTRACTION	0.0016835	0.0135741	0.660791	1.96037	0	26	13	KIT F2R PTAFR OXTR ABAT ITGA2 EDN1 RHOA ADA CTTN NPNT SPHK1 MYOCD
POSITIVE_REGULATION_OF_T_HELPER_1_TYPE_IMMUNE_RESPONSE	0.00714286	0.0355401	0.658967	1.77958	3	18	13	ANXA1 IL1R1 SLC11A1 IL18R1 CCR2 IL27RA IL18 IL12RB1 CCL19 RIPK2 NLRP10 CD80 IL23R
REGULATION_OF_CELLULAR_EXTRAVASATION	0.00169779	0.0135823	0.658949	1.89919	0	22	14	PLCB1 IL1R1 ITGA4 PTAFR PLVAP BST1 ADAM8 THY1 BCR CXCL12 ICAM1 PDGFD RIPK3 CCR2
POSITIVE_REGULATION_OF_MACROPHAGE_ACTIVATION	0.0016835	0.0135741	0.658347	1.95311	0	26	17	ITGAM APP C1QA TLR4 ITGB2 THBS1 CEBPA LRRK2 LBP STAP1 IL33 HAVCR2 IL1RL1 TREM2 TTBK1 MMP8 TLR6
LEUKOCYTE_TETHERING_OR_ROLLING	0.00169492	0.0135741	0.658023	1.92234	0	24	17	GCNT1 ITGA4 PTAFR SELPLG SELP VCAM1 SPN SELL CXCL12 ROCK1 TNF CCR2 ITGB7 ITGB1 CX3CR1 SELE ADD2
LEUKOCYTE_ACTIVATION_INVOLVED_IN_INFLAMMATORY_RESPONSE	0.00163132	0.0135741	0.657115	2.08129	0	35	26	TLR8 ITGAM TLR7 APP GRN TYROBP C1QA ITGB2 PTPRC CX3CL1 ATM LRRK2 TLR3 STAP1 C5AR1 IL33 TNF TREM2 LDLR FPR2 TTBK1 TLR2 AIF1 MMP8 TLR6 CLU
SYMPATHETIC_NERVOUS_SYSTEM_DEVELOPMENT	0.00715564	0.0355555	0.65688	1.80058	3	19	11	SEMA3F SEMA3A SOX4 PLXNA4 FZD3 NRP2 HAND2 GDNF GATA3 GFRA3 TFAP2B
CELL_PROLIFERATION_INVOLVED_IN_KIDNEY_DEVELOPMENT	0.00715564	0.0355555	0.656432	1.79935	3	19	12	GPC3 OSR1 WT1 EGR1 STAT1 MYC CFLAR PTCH1 PDGFD BMP7 SERPINB7 GATA3
AMYLOID_BETA_CLEARANCE	0.00166389	0.0135741	0.656118	2.00077	0	30	20	MME APOE C3 ITGAM ITGB2 MSR1 HMGCR PICALM CD36 C5AR1 ROCK1 HDAC1 TREM2 LDLR MYOCD CLTC MARCO LRP1 RAB5A CLU
POSITIVE_REGULATION_OF_ANTIGEN_RECEPTOR_MEDIATED_SIGNALING_PATHWAY	0.00527241	0.0279773	0.654947	1.82362	2	20	14	LYN PRKCB CMTM3 NFAM1 PTPRC STAP1 ADA LCK SLC39A10 CD226 KCNN4 RELA PRKCH FOXP1
REGULATION_OF_PHAGOCYTOSIS	0.00162866	0.0135741	0.654496	2.38508	0	81	41	PTPRJ PPARG C3 C2 GAS6 MERTK NCKAP1L FCER1G CAMK1D RAB31 AHSG FCGR2B C4B IL2RG TGFB1 ADIPOQ SIRPA CD300A IL2RB HCK SLC11A1 F2RL1 PYCARD SYK APOA1 ALOX15 PTPRC DOCK2 CSK FGR STAP1 CD300LF ITGA2 LMAN2 CALR ANO6 BCR APOA2 CD47 CYBA CD36
ALPHA_BETA_T_CELL_PROLIFERATION	0.00167504	0.0135741	0.654224	1.97527	0	29	22	TGFBR2 TWSG1 LGALS9 SYK PTPRC DOCK2 TNFRSF14 CD274 ELF4 MAPK8IP1 SH3RF1 ITCH IRF1 CCR2 CD3E IL18 BLM ARG2 RASAL3 EBI3 ZAP70 RIPK2
INTERLEUKIN_1_BETA_SECRETION	0.00168634	0.0135741	0.652332	2.06364	0	37	28	TLR8 TLR4 ABCA1 LGALS9 F2RL1 PYCARD APOA1 CASP1 P2RX7 TNFAIP3 ORM1 HK1 CD36 GBP5 AIM2 PML USP50 ARG2 FOXP1 CCL19 TLR6 RIPK2 CCL3 ZC3H12A GSDMD LILRA5 NLRC4 WNT5A
POSITIVE_REGULATION_OF_INTERFERON_ALPHA_PRODUCTION	0.00344234	0.0206055	0.651595	1.85305	1	21	14	TLR8 TLR7 DHX9 TLR4 IRF5 IRF7 TLR9 IFIH1 DDX58 TLR3 STAT1 MMP12 SETD2 TBK1
CD4_POSITIVE_OR_CD8_POSITIVE_ALPHA_BETA_T_CELL_LINEAGE_COMMITMENT	0.00527241	0.0279773	0.651558	1.81418	2	20	13	IRF4 LY9 SPN STAT3 BCL2 LOXL3 BRAF SLAMF6 STAT6 IL12RB1 TBX21 BATF ZFPM1
EOSINOPHIL_MIGRATION	0.0107335	0.0478026	0.651382	1.78551	5	19	15	CCL8 CD300A LGALS3 CX3CL1 ADAM8 CCL5 CCL2 CCL7 PTGER4 CCL22 EPX CCL3 CCL4 CCL24 CCL11
ASTROCYTE_DEVELOPMENT	0.00168634	0.0135741	0.650958	2.0593	0	37	25	APP GRN C1QA TLR4 VIM SMO EGFR PSEN1 PLP1 LAMC3 BACE2 TSPAN2 C5AR1 ROR2 TNF KRAS TREM2 LDLR FPR2 ROR1 TTBK1 CDK6 LRP1 S100A8 ADORA2A
NEGATIVE_REGULATION_OF_INTERLEUKIN_6_PRODUCTION	0.00166945	0.0135741	0.650751	2.07568	0	38	20	GAS6 NCKAP1L TLR4 SIRPA PTPN22 INPP5D IRAK3 TLR9 TNFAIP3 CX3CL1 HGF CSK PTPN6 ORM1 ARRB1 C1QTNF3 CD200R1 BANK1 HAVCR2 TNF
INTERLEUKIN_1_SECRETION	0.00165017	0.0135741	0.650686	2.15335	0	44	32	GAS6 TLR8 TLR4 ABCA1 LGALS9 F2RL1 PYCARD APOA1 CASP1 P2RX7 TNFAIP3 ORM1 IL1R2 HK1 CD36 GBP5 AIM2 PML USP50 ARG2 FOXP1 CCL19 TLR6 RIPK2 CCL3 ZC3H12A SAA1 GSDMD LILRA5 NLRP10 NLRC4 WNT5A
MAST_CELL_MEDIATED_IMMUNITY	0.00165289	0.0135741	0.650401	2.12024	0	41	23	KIT FCER1G LYN PIK3CG GAB2 CPLX2 CD300A LGALS9 SYK RAC2 ADORA2B CBL STXBP2 STXBP1 CD84 BTK FGR IL13RA2 SERPINB9 RASGRP1 HMOX1 NR4A3 MILR1
EPIDERMIS_MORPHOGENESIS	0.00164745	0.0135741	0.650126	1.96265	0	28	19	KRT17 KRT71 SMO ATP7A FGFR2 BCL2 FGF10 IGFBP5 SOSTDC1 KRT25 FGF7 FLG2 KLF4 PLOD3 FOXQ1 NOTCH1 SNAI1 KRT27 INTU
POSITIVE_REGULATION_OF_NEUTROPHIL_MIGRATION	0.00339559	0.0204069	0.649996	1.87339	1	22	12	NCKAP1L IL1R1 CAMK1D THBS4 C3AR1 CD74 RAC2 LBP ADAM8 MOSPD2 EDN1 C5AR1
REGULATION_OF_HUMORAL_IMMUNE_RESPONSE	0.00166389	0.0135741	0.649728	2.22056	0	55	28	CFH C3 C2 PROS1 SERPING1 CFB C1S C1QB C6 C1QA C1QC FCGR2B C3AR1 C4B C7 HPX SPINK5 PTPRC CFP PTPN6 KLK7 VSIG4 C5AR1 CD81 CFI TNF F2 CPN2
MORPHOGENESIS_OF_AN_EPITHELIAL_FOLD	0.00169492	0.0135741	0.649448	1.89729	0	24	13	LUZP1 SULF1 CFL1 EGFR FGFR2 WNT2B WNT2 FGF10 HIF1A GDF7 SOSTDC1 BMP7 BMP5
T_CELL_LINEAGE_COMMITMENT	0.00168067	0.0135741	0.649077	1.91852	0	25	15	IRF4 LY9 SPN IL7 STAT3 BCL2 RHOA LOXL3 BRAF SLAMF6 STAT6 IL12RB1 TBX21 BATF ZFPM1
T_HELPER_1_TYPE_IMMUNE_RESPONSE	0.00168634	0.0135741	0.648788	2.05243	0	37	25	ANXA1 IL1R1 SEMA4A TLR4 SLC11A1 SPN BCL3 IL33 HAVCR2 IL18R1 IL1RL1 CCR2 IL27RA STAT6 IL18 IL18BP IL12RB1 TRAF6 EBI3 CCL19 RIPK2 IL18RAP NLRP10 CD80 IL23R
G_PROTEIN_COUPLED_PURINERGIC_RECEPTOR_SIGNALING_PATHWAY	0.00339559	0.0204069	0.647516	1.86624	1	22	15	ACPP PTAFR GNAI2 ADORA2B GPR34 P2RY12 P2RY10 P2RY13 ADA ADCY5 P2RY14 CNTN2 GPR171 P2RY6 ADORA2A
SEMAPHORIN_PLEXIN_SIGNALING_PATHWAY	0.00166667	0.0135741	0.646633	2.0901	0	40	22	SEMA3D MET SEMA4A ARHGDIA SEMA3F SEMA3A PLXNA4 SEMA5A PLXNB2 PLXNC1 SEMA3E PLXNB1 SEMA3G PLXNA2 SEMA4B NRP2 FLNA HAND2 SEMA3C PLXNA1 NCAM1 GDNF
POSITIVE_REGULATION_OF_CHEMOKINE_PRODUCTION	0.00166389	0.0135741	0.646109	2.14662	0	46	32	POSTN TLR7 APP MBP CSF1R TLR4 CD74 ADIPOQ LGALS9 PYCARD TLR9 ADORA2B TLR3 LBP EGR1 TRPV4 IL7 EIF2AK2 IL33 HIF1A HMOX1 HAVCR2 TNF IL1RL1 MCOLN2 FFAR2 TLR2 AIF1 TWIST1 LPL LRP1 ADAM17
REGULATION_OF_SUPEROXIDE_ANION_GENERATION	0.00688468	0.0344775	0.645642	1.83612	3	21	15	ITGAM TYROBP GNAI3 ITGB2 TGFB1 ACP5 EGFR F2RL1 SYK GNAI2 CYBA CD177 FPR2 AGT PON3
REGULATION_OF_T_HELPER_1_TYPE_IMMUNE_RESPONSE	0.00338983	0.0204057	0.64382	1.88085	1	24	16	ANXA1 IL1R1 SLC11A1 IL33 HAVCR2 IL18R1 IL1RL1 CCR2 IL27RA IL18 IL12RB1 CCL19 RIPK2 NLRP10 CD80 IL23R
REGULATION_OF_NEUTROPHIL_MIGRATION	0.00164745	0.0135741	0.643229	1.94183	0	28	17	NCKAP1L IL1R1 CAMK1D THBS4 C3AR1 CD74 BST1 RAC2 LBP ADAM8 SLAMF8 MOSPD2 EDN1 SLIT2 C5AR1 MPP1 CXCR2
LEUKOCYTE_ADHESION_TO_VASCULAR_ENDOTHELIAL_CELL	0.00165563	0.0135741	0.643075	1.98629	0	32	22	GCNT1 ITGA4 PTAFR SELPLG SELP VCAM1 SPN SELL CXCL12 RHOA ICAM1 ROCK1 TNF CCR2 ITGB7 RELA ITGB1 CX3CR1 SELE KLF4 ADD2 TRAF6
EPITHELIAL_TUBE_BRANCHING_INVOLVED_IN_LUNG_MORPHOGENESIS	0.00164745	0.0135741	0.64285	1.94068	0	28	13	CTSH TNC CELSR1 FGFR2 WNT2B WNT2 FGF10 ESRP2 DLG5 TNF VANGL2 KRAS CTSZ
AMINOGLYCAN_CATABOLIC_PROCESS	0.00163399	0.0135741	0.64236	2.23504	0	60	38	DCN LYVE1 ARSB GNS OGN KERA BGN CD44 GPC6 GPC3 OMD FMOD IDS HPSE LUM TGFB1 SDC2 VCAN SDC3 GLB1 HEXB SDC1 CHP1 STAB2 SGSH HGSNAT OVGP1 GALNS PRELP HMMR GUSB CTBS PGLYRP2 HYAL1 FGF2 SLC9A1 SDC4 CSPG5
ENDOTHELIAL_CELL_APOPTOTIC_PROCESS	0.00165563	0.0135741	0.641801	2.17244	0	51	27	GAS6 PRKCI ITGA4 MAP3K5 THBS1 SEMA5A TNFAIP3 FGB FGA PDCD4 COL18A1 FGG ANO6 ANGPTL4 HIPK1 BMPR2 ICAM1 BRAF FOXO3 TNF NFE2L2 CCL2 TEK CD40 PAK4 NDNF GATA3
INTERLEUKIN_8_SECRETION	0.00168067	0.0135741	0.641074	1.89487	0	25	17	ANXA1 F2R PTPN22 LGALS9 F2RL1 PYCARD CHI3L1 CD14 CD2 TLR1 FFAR2 TLR2 NOS2 TLR6 ANXA4 NLRP10 WNT5A
COLLAGEN_FIBRIL_ORGANIZATION	0.00162866	0.0135741	0.640272	2.14877	0	47	17	COL14A1 LOX DDR2 SFRP2 COMP COL12A1 CYP1B1 FMOD LUM ADAMTS2 ANXA2 AEBP1 ATP7A DPT RB1 ADAMTS3 LOXL2
RENAL_SYSTEM_VASCULATURE_DEVELOPMENT	0.00338983	0.0204057	0.638816	1.86623	1	24	15	PDGFRA PECAM1 PKD2 ACTA2 OSR1 CD34 ANGPT2 WT1 EGR1 CFLAR PDGFD BMP7 TEK TCF21 SERPINB7
TYPE_2_IMMUNE_RESPONSE	0.00165563	0.0135741	0.637866	1.97021	0	32	18	ANXA1 RSAD2 CD74 ECM1 CD86 BCL3 IL33 ARG1 CCR2 IL27RA STAT6 IL18 PRKCZ IDO1 GATA3 ARG2 TBX21 BATF
EXTRACELLULAR_MATRIX_ASSEMBLY	0.00168067	0.0135741	0.637794	1.88517	0	25	15	LOX GAS6 GPM6B ANTXR1 SMPD3 TGFB1 MFAP4 ATP7A FBLN5 EFEMP2 THSD4 SMAD3 HAS1 IHH AGT
POSITIVE_T_CELL_SELECTION	0.00165563	0.0135741	0.637614	2.00316	0	34	23	IRF4 CD74 PTPRC DOCK2 LY9 SPN CD3D STAT3 BCL11B BCL2 LOXL3 BRAF SLAMF6 CD3E CD3G STAT6 IL12RB1 THEMIS TBX21 BATF ZFPM1 ZAP70 ITPKB
RESPONSE_TO_GONADOTROPIN	0.00168067	0.0135741	0.637445	1.88414	0	25	17	POR ASNS WT1 CCNA2 GCLC GATA6 PAPPA ICAM1 EFNA5 PPARGC1A TGFBR3 ITGA3 GJB2 SRD5A1 NOTCH1 PAX8 INHBA
POSITIVE_REGULATION_OF_INTERFERON_GAMMA_PRODUCTION	0.00166113	0.0135741	0.637198	2.1708	0	54	31	TLR8 TLR7 IL1R1 TLR4 TNFRSF13C PTPN22 LGALS9 SASH3 SLC11A1 PYCARD TLR9 CD14 TLR3 IRF8 KLRK1 CD2 BCL3 RASGRP1 HAVCR2 SLAMF6 TNF IL18R1 CCR2 CD3E IL27RA CD226 IL18 IL12RB1 CD276 EBI3 ZFPM1
CHOLESTEROL_EFFLUX	0.00166667	0.0135741	0.636868	2.05854	0	40	18	APOC1 APOE TTC39B SOAT1 NPC2 ABCA1 ADIPOQ PLTP APOA1 SREBF2 APOB PON1 ABCA5 APOA2 ABCG1 APOC3 ABCA12 PTCH1
RESPONSE_TO_PROSTAGLANDIN	0.00166389	0.0135741	0.63448	1.8966	0	27	17	SFRP1 PPARG AKT1 GNG2 ACACA TNC GNB1 PTGFR APOB EDN1 PTGER2 TGFBR3 CCL19 P2RY6 PTGER4 PRKAA1 YY1
ACTIVATION_OF_PHOSPHOLIPASE_C_ACTIVITY	0.00164745	0.0135741	0.633585	1.91271	0	28	23	LPAR1 NTRK2 ADCYAP1R1 EGFR AVPR1A EDNRA P2RY12 C5AR1 AGT SELE GNA15 P2RY6 PLCB2 ANG GPR55 ADRA1A ITK TXK PLCG1 LPAR2 HTR2B S1PR4 GNAQ
ICOSANOID_BIOSYNTHETIC_PROCESS	0.00165563	0.0135741	0.633554	1.95689	0	32	17	FADS1 PTGIS ANXA1 PLA2G4A CD74 TBXAS1 ALOX5AP SYK FABP5 LTC4S ALOX5 AVPR1A HPGDS EDN1 PTGS1 PTGES MGST2
ESTABLISHMENT_OF_ENDOTHELIAL_BARRIER	0.00166113	0.0135741	0.633038	2.03519	0	39	19	MSN CLDN1 TNFRSF1A RAP1B EZR TJP2 F2RL1 ADD1 MYADM FASN WNT7B S1PR2 ICAM1 ROCK1 TNF TJP1 F11R MARVELD2 ENG
EMBRYONIC_CAMERA_TYPE_EYE_MORPHOGENESIS	0.0016835	0.0135741	0.631679	1.874	0	26	19	ALDH1A3 STRA6 HIPK1 LRP6 PAX2 BMP7 SP3 ZEB1 KDM2B IHH TFAP2A FRS2 HIPK2 TWIST1 PROX1 WNT16 WNT5A FOXF2 PHACTR4
REGULATION_OF_CHOLESTEROL_EFFLUX	0.00679117	0.0340439	0.630282	1.81657	3	22	11	APOE TTC39B ABCA1 ADIPOQ PLTP APOA1 SREBF2 PON1 ABCG1 ABCA12 PTCH1
REGULATION_OF_HAIR_CYCLE	0.00338983	0.0204057	0.630275	1.84128	1	24	14	HPSE SMO SPINK5 NIPBL FA2H FERMT1 CDH3 TNF MYSM1 MSX2 CLOCK FST SMAD4 WNT5A
MEMBRANE_LIPID_CATABOLIC_PROCESS	0.00166389	0.0135741	0.629442	1.91942	0	30	16	SGPL1 GM2A CYP1B1 ASAH1 ASAH2 SMPD3 ACER2 PPT1 NAGA HEXB GALC ACER3 MGST2 SPHK1 GBA ACER1
CHONDROCYTE_DEVELOPMENT	0.00165017	0.0135741	0.628954	2.08143	0	44	28	SULF2 COL14A1 TGFBR2 SCARA3 SFRP2 COMP COL12A1 CHST11 SULF1 SMPD3 VIT MATN2 EIF2AK3 SHOX2 ECM1 BMPR2 COCH CHSY1 COL11A1 COL27A1 MSX2 BMPR1B VWA1 SERPINH1 MATN4 MBL2 COL6A2 COL6A1
REGULATION_OF_SUBSTRATE_ADHESION_DEPENDENT_CELL_SPREADING	0.00166389	0.0135741	0.628947	2.0896	0	46	24	ACTN4 FBLN1 POSTN DOCK5 TACSTD2 PREX1 APOA1 GBP1 CORO1C PDPN FGB FGA MYADM FGG CALR DOCK1 FLNA EFNA5 BRAF RCC2 MYOC S100A10 NEDD9 RAC3
POSITIVE_REGULATION_OF_NITRIC_OXIDE_BIOSYNTHETIC_PROCESS	0.00168634	0.0135741	0.628159	1.98717	0	37	22	AKT1 P2RX4 PKD2 TLR4 ITGB2 PTK2B EDN1 JAK2 KLRK1 CD36 ICAM1 SMAD3 TNF AGT HSP90AA1 KLF4 AIF1 MMP8 TLR6 CLU NOS1AP KLF2
REGULATION_OF_REACTIVE_OXYGEN_SPECIES_BIOSYNTHETIC_PROCESS	0.00164204	0.0135741	0.626526	2.26114	0	77	45	PTGIS AKT1 CAV1 ABCD2 FYN P2RX4 PKD2 TLR4 ITGB2 SIRPA ACP5 CD34 ATP2B4 PTK2B EDN1 UCP1 JAK2 KLRK1 STAT3 CD47 TSPO CYBA CD36 RHOA ICAM1 CFLAR DUOXA1 SMAD3 FOXO3 TNF HDAC4 RGN AGT DUOXA2 HSP90AA1 CX3CR1 ARG2 KLF4 AIF1 CTNS MMP8 RAB27A TLR6 CLU NOS1AP
REGULATION_OF_PLATELET_ACTIVATION	0.00167504	0.0135741	0.626425	1.89134	0	29	19	APOE PDGFRA FCER1G LYN CD9 SELP TLR4 SYK ABAT C1QTNF1 PDPN CEACAM1 FGG PLEK UBASH3B F2 THBD HRG NOS3
CELLULAR_DEFENSE_RESPONSE	0.00165289	0.0135741	0.625899	2.04037	0	41	26	CXCL9 IL1RL2 NCF1 CCR5 LGALS3BP TYROBP MNDA ADORA2B NCF2 LBP SPN PTK2B CD5L PRF1 C5AR1 CLEC5A CCR2 CCR6 CXCR2 RELA ITGB1 CX3CR1 ADORA2A LSP1 ITK LY96
MACROPHAGE_DIFFERENTIATION	0.00168634	0.0135741	0.625851	1.97987	0	37	17	APP RIPK1 CSF1R C1QC TGFB1 ADIPOQ CASP8 HCLS1 CEBPA RB1 L3MBTL3 CSF1 PF4 ID2 TSPAN2 CEBPE ROR2
NEGATIVE_CHEMOTAXIS	0.00165289	0.0135741	0.625753	2.03989	0	41	20	FLRT2 SEMA3D SLIT3 SEMA4A SEMA3F SEMA3A PLXNA4 SEMA5A APOA1 SEMA3E SEMA3G ROBO1 SEMA4B NRP2 SLIT2 RHOA EFNA5 SEMA3C ITGB3 UNC5C
SUBSTRATE_DEPENDENT_CELL_MIGRATION	0.00677966	0.0340094	0.62537	1.82695	3	24	16	SEMA3A NTN1 PTPRC ADAM8 ITGA2 ROBO1 MYH10 FN1 P2RY12 CD2AP OPHN1 NRP2 SLIT2 SDCBP CTTN ITGA11
POSITIVE_REGULATION_OF_CYTOKINE_BIOSYNTHETIC_PROCESS	0.00163399	0.0135741	0.624918	2.16503	0	59	37	CYBB TLR8 TLR7 APP IRF4 TYROBP PTAFR TLR4 CARD11 THBS1 TNFRSF13C SYK TLR9 PTPRC TLR3 LBP EGR1 SPN APOA2 STAT3 CD86 BCL3 CD4 TLR1 HMOX1 TNF IRF1 CCR2 CD3E RELA LTB TBK1 CD276 TRAF6 EBI3 ZFPM1 TLR6
POSITIVE_REGULATION_OF_INTERLEUKIN_1_SECRETION	0.00329489	0.0202312	0.624441	1.88511	1	28	18	TLR8 TLR4 LGALS9 PYCARD CASP1 P2RX7 ORM1 HK1 AIM2 USP50 CCL19 RIPK2 CCL3 SAA1 GSDMD LILRA5 NLRP10 WNT5A
NEGATIVE_REGULATION_OF_ENDOTHELIAL_CELL_APOPTOTIC_PROCESS	0.00167504	0.0135741	0.624431	1.88532	0	29	16	GAS6 SEMA5A TNFAIP3 FGB FGA FGG ANGPTL4 ICAM1 BRAF NFE2L2 TEK PAK4 NDNF GATA3 KDR GATA2
POSITIVE_REGULATION_OF_CYTOSOLIC_CALCIUM_ION_CONCENTRATION_INVOLVED_IN_PHOSPHOLIPASE_C_ACTIVATING_G_PROTEIN_COUPLED_SIGNALING_PATHWAY	0.0016835	0.0135741	0.623264	1.84903	0	26	17	LPAR1 F2R C3AR1 TGM2 F2RL1 S1PR1 EDN1 LPAR3 P2RY10 GPR65 GPR174 LPAR6 F2RL2 GNA15 GPR35 GPR18 GPR55
RESPIRATORY_BURST	0.00332779	0.0202312	0.621733	1.85849	1	27	15	CYBB NCF1 CAMK1D GRN PIK3CG HCK SLC11A1 RAC2 NCF2 LBP SLAMF8 PGAM1 CD52 BCR CYBA
ENDOTHELIAL_CELL_DEVELOPMENT	0.00164204	0.0135741	0.621427	2.14422	0	57	28	CLIC4 MSN HEG1 CLDN1 MET TNFRSF1A PECAM1 TNMD RAP1B EZR TJP2 F2RL1 COL23A1 ADD1 COL18A1 MYADM FASN STC1 WNT7B S1PR2 ICAM1 ROCK1 TNF TJP1 F11R MARVELD2 ENG ARHGEF26
NEGATIVE_REGULATION_OF_RESPONSE_TO_CYTOKINE_STIMULUS	0.00164474	0.0135741	0.620355	2.09658	0	49	26	PPARG GAS6 SLIT3 CAV1 ADIPOQ CCDC3 PARP14 F2RL1 APOA1 IRAK3 NLRC5 PTPRC SAMHD1 ECM1 STAP1 CCL5 ROBO1 IL1R2 PELI3 SLIT2 IL1RN MMP12 ARG1 DCST1 PXDN OTOP1
RESPONSE_TO_INTERLEUKIN_6	0.00163132	0.0135741	0.619541	1.96228	0	35	23	PTGIS IL6ST SELPLG PID1 PCK1 CHI3L1 CEBPA CBL STAT1 FGG SBNO2 JAK2 STAT3 NFKB1 ICAM1 SOCS3 PTPN11 PPARGC1A GFI1 RELA CITED1 PTPRT JAK1
INTERLEUKIN_4_PRODUCTION	0.00168919	0.0135741	0.619386	1.89601	0	31	20	FCER1G IRF4 LGALS9 SASH3 SYK CD83 IL1RAP RBPJ VTCN1 CD86 IL33 HAVCR2 CD3E PRKCZ GATA3 ZFPM1 IL20RB NOTCH1 ITK EPX
DENDRITIC_CELL_MIGRATION	0.003367	0.0203349	0.619127	1.83676	1	26	18	GAS6 EPS8 CCR1 CCR5 PIK3CG LGALS9 SLAMF8 CCL5 CALR ANO6 DOCK8 GPR183 TRPM2 CCR2 CCR6 CXCR2 ARHGEF5 CCL19
CALCIUM_INDEPENDENT_CELL_CELL_ADHESION_VIA_PLASMA_MEMBRANE_CELL_ADHESION_MOLECULES	0.0101868	0.0459248	0.618533	1.78271	5	22	13	CLDN3 CLDN1 CLDN10 CLDN7 CX3CL1 CLDN4 CLDN8 CLDN22 CLDN2 CLDN23 CLDN15 CLDN19 CLDN11
POSITIVE_REGULATION_OF_SMOOTH_MUSCLE_CELL_MIGRATION	0.00164745	0.0135741	0.61836	1.96044	0	36	20	NOX4 POSTN IQGAP1 IGF1 LPAR1 DOCK5 DOCK7 ATP7A ITGA2 CCL5 BCL2 IGFBP5 PDGFD HDAC4 NR4A3 SRC AGT AIF1 P2RY6 LRP1
POSITIVE_REGULATION_OF_INTERLEUKIN_2_PRODUCTION	0.00166389	0.0135741	0.617888	1.88419	0	30	19	ANXA1 IRF4 CARD11 SASH3 CD83 PTPRC VTCN1 SPTBN1 CD86 CD4 RUNX1 MALT1 CCR2 CD3E TRAF6 IL1A RIPK2 PRKD2 CD80
POSITIVE_REGULATION_OF_ALPHA_BETA_T_CELL_DIFFERENTIATION	0.00165017	0.0135741	0.617067	2.04209	0	44	31	TGFBR2 ANXA1 NCKAP1L LGALS9 SASH3 SYK CD83 PNP GLI3 AP3B1 RUNX3 CD86 RHOA ADA RUNX1 MALT1 SOCS1 IHH IL18 NFKBID PRKCZ IL12RB1 CCL19 MYB ZAP70 AP3D1 ITPKB RIPK2 CD80 NFKBIZ IL23R
REGULATION_OF_DEFENSE_RESPONSE_TO_VIRUS_BY_VIRUS	0.00329489	0.0202312	0.616909	1.86237	1	28	13	B2M FYN HCK AP2B1 AP1M2 DOCK2 PAK2 EIF2AK2 ELMO1 CD4 LCK AP1G1 PACS1
FATTY_ACYL_COA_BIOSYNTHETIC_PROCESS	0.00847458	0.0404401	0.616827	1.80199	4	24	13	ACSL5 HSD17B12 ELOVL5 ACACA SLC25A1 ELOVL4 ACLY ACSL1 PPT1 ACSBG1 ELOVL6 FASN ELOVL1
REGULATION_OF_STEROL_TRANSPORT	0.00163934	0.0135741	0.616559	2.02351	0	43	19	APOC1 APOE PPARG TTC39B ABCA1 ADIPOQ ANXA2 PLTP APOA1 SREBF2 LIPG PON1 APOA2 TSPO ABCG1 NFKB1 APOC3 ABCA12 PTCH1
LYMPHOCYTE_COSTIMULATION	0.00165289	0.0135741	0.616499	2.08599	0	50	35	DPP4 AKT1 CAV1 LYN FYN CARD11 TNFRSF13C CSK PTPN6 PAK2 TNFSF13B TNFRSF14 VAV1 CD274 PAK3 KLRK1 CD86 EFNB3 GRAP2 LCK PTPN11 CD3E CD5 PDCD1 SRC MAP3K8 PDCD1LG2 CCL19 EFNB1 TNFSF14 BTLA CTLA4 ICOS PDPK1 CD80
PROSTATE_GLAND_MORPHOGENESIS	0.00840336	0.0401786	0.616223	1.82142	4	25	16	SFRP1 ESR1 TNC SULF1 SERPINB5 FGFR2 FGF10 BMP7 CRIP1 FRS2 ID4 CYP7B1 GLI2 NOTCH1 FOXA1 WNT5A
POSITIVE_REGULATION_OF_EPITHELIAL_CELL_APOPTOTIC_PROCESS	0.00332779	0.0202312	0.616049	1.8415	1	27	14	SORT1 PRKCI ITGA4 THBS1 GSN SFRP4 PDCD4 COL18A1 ANO6 JAK2 FOXO3 PPARGC1A CCL2 CD40
POSITIVE_REGULATION_OF_CD4_POSITIVE_ALPHA_BETA_T_CELL_ACTIVATION	0.00165563	0.0135741	0.615645	1.90157	0	32	19	TGFBR2 ANXA1 NCKAP1L LGALS9 SASH3 CD83 CD86 MALT1 SOCS1 IL18 NFKBID PRKCZ IL12RB1 CCL19 MYB RIPK2 CD80 NFKBIZ IL23R
T_CELL_MIGRATION	0.00165563	0.0135741	0.614408	2.07972	0	51	40	MSN APP ITGA4 STK39 PIK3CG APOD ADAM10 PYCARD S1PR1 CXCL16 SPN ECM1 ADAM8 TNFRSF14 CCL5 CD200R1 DOCK8 CXCL12 RHOA ICAM1 GPR183 LRCH1 RIPK3 CCR2 CCL2 ITGB7 MYO1G CCR6 AIF1 CXCR3 TNFSF14 ADAM17 ZAP70 CCL3 CXCL10 WNK1 WNT5A FADD CXCL13 PIK3CD
CHONDROCYTE_DEVELOPMENT_INVOLVED_IN_ENDOCHONDRAL_BONE_MORPHOGENESIS	0.010118	0.0458119	0.614104	1.78226	5	23	15	COL14A1 TGFBR2 SCARA3 COL12A1 SMPD3 VIT MATN2 COCH COL27A1 VWA1 SERPINH1 MATN4 MBL2 COL6A2 COL6A1
KERATAN_SULFATE_BIOSYNTHETIC_PROCESS	0.00505051	0.0273532	0.613365	1.81967	2	26	16	OGN ST3GAL1 KERA OMD FMOD LUM B3GNT3 B4GALT6 B3GNT2 CHST1 PRELP ST3GAL4 B3GNT7 SLC35D2 B4GALT4 CHST2
OUTFLOW_TRACT_SEPTUM_MORPHOGENESIS	0.00505051	0.0273532	0.612314	1.81655	2	26	12	TGFBR2 PARVA FGFR2 ROBO1 GATA6 NRP2 BMPR2 SEMA3C ZFPM2 MSX2 LRP2 ENG
PEPTIDE_CATABOLIC_PROCESS	0.0101868	0.0459248	0.612262	1.76463	5	22	11	CTSH ENPEP ACE ANPEP LNPEP TRHDE ERAP1 CPQ ECE1 GGT1 CHAC1
INTESTINAL_ABSORPTION	0.00167224	0.0135741	0.612139	1.90024	0	33	15	LIMA1 ACO1 EZR TJP2 APOA1 VDR FABP1 KCNQ1 SLC2A5 SLC46A1 APOA2 PLS1 CD36 F11R LDLR
POSITIVE_REGULATION_OF_B_CELL_PROLIFERATION	0.00168634	0.0135741	0.612046	1.9362	0	37	19	NCKAP1L TLR4 CD74 CARD11 TNFRSF13C BST1 SASH3 TLR9 PTPRC CD38 TNFSF13B IRS2 IL7 BCL2 GPR183 CD81 ADA SLC39A10 CD40
REGULATION_OF_PHOSPHOLIPASE_C_ACTIVITY	0.00165289	0.0135741	0.612044	1.9952	0	41	32	KIT PDGFRA ESR1 LPAR1 NTRK2 ADCYAP1R1 PTAFR EGFR AVPR1A EDNRA BICD1 P2RY12 C5AR1 AGT FGF2 SELE GNA15 P2RY6 ABL2 PLCB2 ANG GPR55 ADRA1A ITK TXK PLCG1 LPAR2 FGFR1 HTR2B S1PR4 NTRK3 GNAQ
REGULATION_OF_MACROPHAGE_ACTIVATION	0.00163666	0.0135741	0.612042	2.0808	0	52	28	ITGAM APP GRN C1QA FCGR2B TLR4 ITGB2 CD74 THBS1 CEBPA PTPRC CX3CL1 ATM LRRK2 LBP MFHAS1 STAP1 VSIG4 C5AR1 IL33 HAVCR2 TNF IL1RL1 RORA TREM2 LDLR SHPK TTBK1
FIBRINOLYSIS	0.00499168	0.0271547	0.611966	1.8293	2	27	19	PROS1 SERPING1 PLAT THBS1 ANXA2 FGB PLG FGA KRT1 FGG F2 THBD PLAUR SERPINF2 SERPINB2 HRG TMPRSS6 APOH FAP
NEGATIVE_REGULATION_OF_B_CELL_ACTIVATION	0.00168919	0.0135741	0.611921	1.87315	0	31	14	SFRP1 TYROBP LYN FCGR2B MNDA CD300A INPP5D TNFAIP3 ATM SAMSN1 CASP3 BTK ID2 BANK1
POSITIVE_REGULATION_OF_PHOSPHATIDYLINOSITOL_3_KINASE_SIGNALING	0.00164204	0.0135741	0.611582	2.20721	0	77	43	DCN KIT PDGFRA PDGFC NCF1 NEDD4 IGF1 PIK3AP1 NTRK2 LYN F2R FYN PIK3CG SELP F2RL1 PIK3R5 HCLS1 PRR5L CBL HGF RELN PTPN6 FGR PLXNB1 CAT CCL5 IRS2 PRR5 JAK2 ERBB3 FLT3 FLT4 PDGFD MYOC TNF F2 TEK ERBB4 SRC IL18 AGT SERPINA12 PIK3CB
NEURON_PROJECTION_EXTENSION_INVOLVED_IN_NEURON_PROJECTION_GUIDANCE	0.00164745	0.0135741	0.6111	1.93742	0	36	16	SEMA3D SLIT3 ALCAM SEMA4A SEMA3F SEMA3A PLXNA4 SEMA5A SEMA3E SEMA3G SEMA4B CXCL12 NRP2 SLIT2 BMPR2 SEMA3C
TOLL_LIKE_RECEPTOR_4_SIGNALING_PATHWAY	0.00168919	0.0135741	0.611018	1.87039	0	31	13	ITGAM PIK3AP1 LYN TLR4 ITGB2 PTPN22 F2RL1 TICAM2 TNFAIP3 CD14 LBP MFHAS1 S100A14
REGULATION_OF_B_CELL_PROLIFERATION	0.00164204	0.0135741	0.610914	2.10795	0	57	30	NCKAP1L TYROBP LYN FCGR2B TLR4 MNDA CD74 CARD11 CD300A TNFRSF13C INPP5D BST1 SASH3 TLR9 IKZF3 PTPRC AHR ATM CD38 CASP3 BTK TNFSF13B IRS2 IL7 BCL2 GPR183 CD81 ADA SLC39A10 CD40
REGULATION_OF_GRANULOCYTE_CHEMOTAXIS	0.00168634	0.0135741	0.610734	1.93205	0	37	22	RARRES2 NCKAP1L CAMK1D THBS4 C3AR1 CD74 THBS1 BST1 RAC2 LBP CSF1 MAPK3 TRPV4 MOSPD2 CCL5 EDN1 S100A14 SLIT2 C5AR1 MPP1 CMKLR1 CXCR2
SUBSTRATE_ADHESION_DEPENDENT_CELL_SPREADING	0.00160514	0.0135741	0.610625	2.23105	0	80	42	AXL ACTN4 FBLN1 LAMB1 PARVA MERTK POSTN ANTXR1 ITGA4 ITGA8 DOCK5 FERMT3 TACSTD2 PREX1 APOA1 GBP1 CORO1C PDPN FGB FGA MYADM PARVG MICALL2 FN1 FGG CALR DOCK1 SRGAP2 FZD4 FLNA EFNA5 BRAF RCC2 ITGB3 MYOC TYRO3 TEK S100A10 ITGB7 NEDD9 SRC RAC3
REGULATION_OF_T_CELL_MIGRATION	0.00163132	0.0135741	0.609418	1.93022	0	35	22	APP ITGA4 STK39 APOD ADAM10 PYCARD SPN ECM1 ADAM8 TNFRSF14 CCL5 CD200R1 DOCK8 CXCL12 RHOA LRCH1 RIPK3 CCR2 CCR6 AIF1 TNFSF14 ADAM17
REGULATION_OF_SUPEROXIDE_METABOLIC_PROCESS	0.00165563	0.0135741	0.609081	1.8813	0	32	21	ITGAM TYROBP GNAI3 ITGB2 TGFB1 ACP5 BST1 EGFR F2RL1 SYK GNAI2 FBLN5 CYBA CD36 TNF NFE2L2 BMP7 CD177 FPR2 RGN AGT
POSITIVE_REGULATION_OF_TOLL_LIKE_RECEPTOR_SIGNALING_PATHWAY	0.010118	0.0458119	0.608893	1.76713	5	23	15	CAV1 RSAD2 TLR5 PTPN22 F2RL1 TICAM2 TLR9 TLR3 LBP MFHAS1 CYBA TLR1 LTF TREML4 TLR2
EMBRYONIC_DIGESTIVE_TRACT_DEVELOPMENT	0.00167224	0.0135741	0.608259	1.8882	0	33	18	PDGFRA RARRES2 PCSK5 STRA6 SHOX2 FGFR2 RBPMS2 NIPBL ID2 GLI3 ALDH1A2 FGF10 ADA SALL1 TNF TCF21 TCF7 IHH
VASCULAR_SMOOTH_MUSCLE_CONTRACTION	0.0101868	0.0459248	0.608195	1.75291	5	22	13	PIK3C2A COMP DOCK5 ACTA2 CD38 EDNRA EDN1 EDNRB ARHGAP42 BBS2 RHOA EDN3 AGT
FC_RECEPTOR_MEDIATED_STIMULATORY_SIGNALING_PATHWAY	0.00162602	0.0135741	0.607885	2.20823	0	79	38	PTPRJ ARPC1B NCKAP1 NCKAP1L FCER1G LYN MYO1C WIPF1 VAV2 FYN FCGR2B PLCG2 HCK CYFIP1 SYK ARPC5 PTPRC CSK FGR MAPK3 ACTG1 VAV1 WAS ACTR3 DOCK1 LIMK1 CD47 WASF2 ELMO2 ABI1 ELMO1 BAIAP2 NR4A3 CD3G MYO1G CD226 PLSCR1 SRC
INTERLEUKIN_2_BIOSYNTHETIC_PROCESS	0.0101868	0.0459248	0.607437	1.75073	5	22	13	IRF4 CARD11 IL1RAP PTPRC LAG3 CD86 CD4 CD3E IL18 PAWR IL1A CD80 SFTPD
DIGESTIVE_TRACT_MORPHOGENESIS	0.00166389	0.0135741	0.606976	2.01661	0	46	22	SFRP1 PDGFRA SFRP2 SFRP5 EGFR DACT1 STRA6 SHOX2 FGFR2 RBPMS2 NIPBL ID2 GLI3 AHI1 BCL2 FGF10 HIF1A SMAD3 VANGL2 TCF21 TCF7 IHH
REGULATION_OF_MONONUCLEAR_CELL_MIGRATION	0.00163666	0.0135741	0.605723	1.9829	0	42	29	PLCB1 RARRES2 CCR1 NBL1 LYN C3AR1 TGFB1 LGMN THBS1 LGALS3 CSF1 SLAMF8 MAPK3 TRPV4 MOSPD2 CCL5 ANO6 S100A14 CXCL12 SLIT2 C5AR1 PDGFD TNF CCR2 CMKLR1 FPR2 BMP5 GREM1 AIF1
T_CELL_ACTIVATION_INVOLVED_IN_IMMUNE_RESPONSE	0.00163934	0.0135741	0.605715	2.18032	0	76	44	ANXA1 FCER1G SEMA4A IRF4 APBB1IP FCGR2B LGALS9 LCP1 LGALS3 SLC11A1 F2RL1 ATP7A PSEN1 LY9 SPN CEACAM1 STAT3 CD86 BCL3 ICAM1 GPR183 LOXL3 HAVCR2 SLAMF6 IL18R1 RORA MALT1 EOMES ITGAL STAT6 IL18 NFKBID PRKCZ CLEC4E GATA3 FOXP1 IL12RB1 CCL19 MYB TBX21 BATF RAB27A PTGER4 ZFPM1
INTERFERON_ALPHA_PRODUCTION	0.00329489	0.0202312	0.605327	1.82741	1	28	17	TLR8 TLR7 DHX9 TLR4 IRF5 IRF7 TLR9 IFIH1 DDX58 TLR3 STAT1 HAVCR2 MMP12 NMI SETD2 TBK1 AZI2
T_CELL_SELECTION	0.00166389	0.0135741	0.605235	2.01082	0	46	29	IRF4 CD74 CARD11 SYK PTPRC DOCK2 LY9 SPN GLI3 CD3D STAT3 BCL11B BCL2 RHOA CD4 LOXL3 BRAF SLAMF6 CD3E CD3G STAT6 GATA3 IL12RB1 THEMIS TBX21 BATF ZFPM1 ZAP70 ITPKB
POSITIVE_REGULATION_OF_SMOOTH_MUSCLE_CELL_PROLIFERATION	0.00161031	0.0135741	0.605148	2.22265	0	84	47	TGFBR2 AKT1 IGF1 GNAI3 MAP3K5 PTAFR SMPD3 TGM2 THBS1 EGFR HPGD GNAI2 CX3CL1 HMGCR FGFR2 S1PR1 MMP2 RBPMS2 STAT1 CALCRL ITGA2 ID2 CCL5 EDN1 IRAK4 JAK2 CYBA IGFBP5 ERN1 HMOX1 DNMT1 PDGFD TNF PPARGC1A HDAC4 NR4A3 IL18 SERPINF2 AGT FGF2 FOXP1 AIF1 TRAF6 MYB P2RY6 LDLRAP1 MMP9
POSITIVE_REGULATION_OF_REACTIVE_OXYGEN_SPECIES_BIOSYNTHETIC_PROCESS	0.00163934	0.0135741	0.605101	2.01046	0	45	28	AKT1 P2RX4 PKD2 TLR4 ITGB2 PTK2B EDN1 JAK2 KLRK1 CYBA CD36 ICAM1 DUOXA1 SMAD3 FOXO3 TNF HDAC4 AGT DUOXA2 HSP90AA1 KLF4 AIF1 MMP8 RAB27A TLR6 CLU NOS1AP KLF2
REGULATION_OF_LYMPHOCYTE_MIGRATION	0.00165563	0.0135741	0.604381	2.04578	0	51	37	MSN AKT1 APP ITGA4 STK39 APOD ADAM10 ADTRP PYCARD STK10 SPN ECM1 ADAM8 PTK2B TNFRSF14 CCL5 CD200R1 DOCK8 KLRK1 CXCL12 RHOA LRCH1 RIPK3 CCR2 CCL2 CCL7 CCR6 AIF1 TNFSF14 ADAM17 CCL3 CCL4 GCSAM CXCL10 WNK1 WNT5A FADD
POSITIVE_REGULATION_OF_INTERLEUKIN_6_PRODUCTION	0.00160514	0.0135741	0.60372	2.17306	0	72	33	IL1RL2 TLR8 TLR7 FCER1G APP MBP TYROBP F2R PTAFR DHX9 IL17RC TLR4 LGALS9 F2RL1 PYCARD P2RX7 TLR9 IFIH1 IL1RAP ADORA2B DDX58 TLR3 LBP TRPV4 STAT3 CYBA CD36 MAPK13 IL33 TLR1 IL1RN PTPN11 TNF
NEURON_MATURATION	0.00163666	0.0135741	0.603465	1.9755	0	42	21	NTN4 C3 APP C1QA RB1 CX3CL1 LRRK2 B4GALT6 EDNRB NRCAM BCL11A BCL2 CDKN1C MYOC IRX5 RET NR4A2 RAC3 LGI4 CNTN2 GLDN
CELLULAR_RESPONSE_TO_ALCOHOL	0.00163934	0.0135741	0.603364	2.17186	0	76	46	CYBB SFRP1 PPARG AACS CTNNA1 ADCY3 AKT1 GNG2 ACACA TNC GNB1 CDH1 ABCA1 SMO ADAM15 XRN1 PTGFR AHR ADCY7 MAP4K1 KCNMB1 PTGER2 LRP6 EFNA5 GNAI1 PTCH1 FOXO3 BRCA1 ADCY5 ADCY1 ITPR2 CCL7 UGT1A1 PTEN CDK4 BLM GRAMD1C KLF4 ATP2B1 LRP8 RAD51 P2RY6 PTGER4 GRAMD1B PRKAA1 KLF2
INTERFERON_GAMMA_MEDIATED_SIGNALING_PATHWAY	0.00162866	0.0135741	0.60275	2.11544	0	63	40	IFNGR1 PPARG CD44 B2M IRF6 IRF4 PTAFR IRF5 CIITA IRF7 HCK VCAM1 PARP14 GBP2 HPX IFI30 GBP1 NLRC5 PARP9 STAT1 IRF9 TRIM21 OAS3 IRF8 JAK2 ICAM1 SOCS3 ARG1 NMI IRF1 NCAM1 SOCS1 PML OTOP1 SP100 TRIM25 OAS2 JAK1 TRIM62 IRF2
REGULATION_OF_PHOSPHOLIPASE_ACTIVITY	0.00162075	0.0135741	0.602658	2.11126	0	62	46	KIT ANXA8 PDGFRA ANXA1 RGS2 ESR1 LPAR1 NTRK2 ADCYAP1R1 ARF4 PTAFR GNA13 EGFR PPT1 AVPR1A FGFR2 EDNRA BICD1 CCL5 P2RY12 C5AR1 FGFR3 PRKCZ AGT FGF2 SELE GNA15 P2RY6 ABL2 LRP1 PLCB2 ANG ANGPTL3 GPR55 ADRA1A APOC2 ITK TXK SNCA PLCG1 PDPK1 LPAR2 FGFR1 HTR2B S1PR4 NTRK3
LOW_DENSITY_LIPOPROTEIN_PARTICLE_CLEARANCE	0.00163132	0.0135741	0.601891	1.90638	0	35	20	LIPA SOAT1 NPC2 ADIPOQ ANXA2 AP2B1 CSK APOB EHD1 CD36 APOC3 HNRNPK HMOX1 MYLIP LDLR CLTA CLTC LDLRAP1 DGAT2 NR1H4
NITRIC_OXIDE_BIOSYNTHETIC_PROCESS	0.00163399	0.0135741	0.601137	2.11812	0	65	38	PTGIS CYP1B1 AKT1 CAV1 P2RX4 PKD2 TLR4 ITGB2 SIRPA ACP5 CD34 ATP2B4 PTK2B EDN1 JAK2 KLRK1 CD47 TSPO CD36 ICAM1 SMAD3 TNF RORA RGN AGT HSP90AA1 CX3CR1 ARG2 KLF4 NOS2 AIF1 NOS3 MMP8 TLR6 CLU NOS1AP GCH1 KLF2
NEUROTRANSMITTER_BIOSYNTHETIC_PROCESS	0.00157729	0.0135741	0.600401	2.22547	0	86	47	PTGIS CYP1B1 AKT1 HDC DPYD CAV1 P2RX4 PKD2 TLR4 ITGB2 SIRPA ACP5 MOXD1 CD34 ATP2B4 SLC6A4 PTK2B TPH1 EDN1 ALDH9A1 JAK2 KLRK1 CD47 TSPO CD36 ICAM1 UPB1 SMAD3 PAH TNF RORA SLC44A4 RGN AGT HSP90AA1 CX3CR1 ARG2 KLF4 NOS2 AIF1 NOS3 MMP8 TLR6 CLU NOS1AP GCH1 KLF2
LYMPHOCYTE_MIGRATION	0.00161031	0.0135741	0.600297	2.20483	0	84	61	GAS6 MSN AKT1 APP CCL8 ITGA4 STK39 PIK3CG APOD ADAM10 ADTRP PYCARD CX3CL1 STK10 S1PR1 CXCL16 SPN ECM1 ADAM8 PTK2B TNFRSF14 CCL5 CD200R1 DOCK8 KLRK1 CXCL12 RHOA ICAM1 GPR183 LRCH1 RIPK3 CCR2 RET CCL2 HSD3B7 ITGB7 MYO1G CCL7 CCR6 GATA3 CH25H AIF1 CXCR3 CKLF CCL19 CYP7B1 TNFSF14 TBX21 ADAM17 ZAP70 CCL22 CCL3 CCL4 GCSAM SAA1 CXCL10 WNK1 CCL24 WNT5A CCL11 FADD
POSITIVE_REGULATION_OF_INTERLEUKIN_10_PRODUCTION	0.00335008	0.0202661	0.600221	1.81222	1	29	16	FCER1G IRF4 TLR4 LGALS9 SASH3 PYCARD CD34 CD83 TLR9 HGF CD274 BCL3 PRKCZ TLR2 TIGIT IL20RB
EPITHELIAL_CELL_DIFFERENTIATION_INVOLVED_IN_KIDNEY_DEVELOPMENT	0.00163666	0.0135741	0.599973	1.96407	0	42	26	IQGAP1 PRKX BASP1 ACTA2 SMO ADIPOQ OSR1 MYO1E CD34 MTSS1 WT1 WWTR1 STAT1 SALL1 PAX2 GDNF PROM1 CITED1 PODXL MAGI2 GATA3 GREM1 MMP9 PTPRO NOTCH1 PAX8
REGULATION_OF_SYSTEMIC_ARTERIAL_BLOOD_PRESSURE_MEDIATED_BY_A_CHEMICAL_SIGNAL	0.00165289	0.0135741	0.599712	1.955	0	41	23	MME ENPEP ACE F2R CMA1 OXTR PCSK5 F2RL1 AVPR1A CPA3 SLC2A5 EDN1 CYBA RHOA ECE1 CTSZ GJA5 EDN3 SERPINF2 AGT ADRB3 HSD11B2 NOS3
PHAGOCYTOSIS	0.0015625	0.0135741	0.599163	2.50753	0	227	112	AXL PTPRJ PPARG C3 C2 GAS6 ARPC1B LEPR MERTK ANXA1 COLEC12 NCKAP1 CD302 NCKAP1L ITGAM FCER1G MET CAMK1D PECAM1 LYN MYO1C RAB31 WIPF1 VAV2 FYN AHSG RAB34 CLEC7A FCGR2B PLD4 C4B ABCA1 ITGB2 PLCG2 IL2RG TGFB1 ADIPOQ TGM2 SIRPA CD300A THBS1 SPG11 IL2RB HCK GSN TXNDC5 BIN2 SLC11A1 F2RL1 PYCARD CYFIP1 SYK APOA1 ARPC5 P2RX7 ALOX15 CORO1C CD14 PTPRC NCF2 MSR1 DOCK2 CSK LBP ARHGAP25 FGR MAPK3 ACTG1 STAP1 …
POSITIVE_REGULATION_OF_VASOCONSTRICTION	0.00335008	0.0202661	0.598299	1.80642	1	29	17	AKT1 CAV1 F2R PTAFR OXTR EGFR AVPR1A FGB FGA CD38 FGG RHOA ICAM1 CASR HRH2 GJA5 ADRA2C
HETEROPHILIC_CELL_CELL_ADHESION_VIA_PLASMA_MEMBRANE_CELL_ADHESION_MOLECULES	0.00167224	0.0135741	0.598154	1.85683	0	33	21	ALCAM CXADR PTPRD CADM3 SELP VCAM1 AMIGO2 SCARF2 ICAM1 TENM4 CD6 HMCN1 ITGAL DCHS1 SELE CDH2 CRB2 TENM3 CADM1 NLGN1 TENM2
INTERLEUKIN_1_BETA_PRODUCTION	0.00164204	0.0135741	0.598117	2.10177	0	64	47	TLR8 IGF1 APP TYROBP F2R CMA1 TLR4 ABCA1 SIRPA ACP5 LGALS9 F2RL1 PYCARD APOA1 CASP1 P2RX7 TNFAIP3 CX3CL1 EGR1 ORM1 HK1 JAK2 CD36 ERRFI1 GBP5 SMAD3 AIM2 PML SPHK1 CX3CR1 USP50 ARG2 MR1 FOXP1 CCL19 TLR6 ARRB2 RIPK2 CCL3 ZC3H12A GSDMD LILRA5 NLRC4 S1PR3 WNT5A MEFV NOD1
POSITIVE_REGULATION_OF_GLUCOSE_TRANSMEMBRANE_TRANSPORT	0.00163132	0.0135741	0.597942	1.89387	0	35	15	C3 GPC3 AKT1 IGF1 PRKCI ADIPOQ RNASEL MEF2A ADIPOR2 SORBS1 IRS2 BRAF PTPN11 NFE2L2 NR4A3
APOPTOTIC_CELL_CLEARANCE	0.00166113	0.0135741	0.597925	1.9223	0	39	20	AXL C3 C2 GAS6 MERTK C4B TGM2 THBS1 SPG11 TXNDC5 ALOX15 CD300LF CD36 ITGB3 TYRO3 CCL2 RAC3 MFGE8 MARCO LRP1
RESPONSE_TO_AMYLOID_BETA	0.00166113	0.0135741	0.59774	1.92171	0	39	21	IGF1 APP ITGA4 FYN FCGR2B TLR4 LGMN ATP1A3 VCAM1 PSEN1 NGFR CASP4 CD36 ICAM1 FOXO3 TREM2 FPR2 DNM1 EPHA4 LRP1 TLR6
POSITIVE_REGULATION_OF_LYMPHOCYTE_MIGRATION	0.00168919	0.0135741	0.596867	1.82707	0	31	25	APP ITGA4 STK39 ADAM10 PYCARD SPN ADAM8 PTK2B TNFRSF14 CCL5 DOCK8 CXCL12 RHOA CCR2 CCL7 AIF1 TNFSF14 ADAM17 CCL3 CCL4 CXCL10 WNK1 WNT5A FADD CXCL13
NEGATIVE_REGULATION_OF_LEUKOCYTE_PROLIFERATION	0.00160514	0.0135741	0.596355	2.14655	0	72	40	GPNMB CCL8 TYROBP LYN TWSG1 PLA2G2D FCGR2B ENPP3 MNDA PDE5A TGFB1 CD300A INPP5D LGALS9 TNFAIP3 ATM PTPN6 SPN CASP3 BTK TNFRSF14 CD274 VTCN1 VSIG4 CD86 IL2RA PLA2G2F LST1 HAVCR2 ARG1 DLG5 ITCH IHH IDO1 GREM1 PAWR ARG2 TNFRSF13B PDCD1LG2 SDC4
INTERLEUKIN_1_PRODUCTION	0.00164204	0.0135741	0.596337	2.15219	0	77	55	GAS6 ANXA1 TLR8 IGF1 APP TYROBP F2R CMA1 TLR4 ABCA1 SIRPA ACP5 LGALS9 F2RL1 PYCARD APOA1 CASP1 P2RX7 TNFAIP3 CX3CL1 EGR1 CEACAM1 ORM1 IL1R2 HK1 JAK2 CD36 ERRFI1 GBP5 HAVCR2 SMAD3 AIM2 PML SPHK1 CX3CR1 USP50 ARG2 MR1 FOXP1 CCL19 TLR6 NR1H4 ARRB2 RIPK2 CCL3 ZC3H12A SAA1 GSDMD LILRA5 NLRP10 NLRC4 S1PR3 WNT5A MEFV NOD1
CORNIFICATION	0.0016	0.0135741	0.595992	2.22301	0	93	33	DSP KRT17 KRT14 ST14 KRT71 PERP PCSK6 KRT19 KRT79 PKP1 CDSN DSG2 SPINK5 KRT10 KRT7 PKP3 KRT80 PKP4 DSC3 KRT77 KRT1 DSC1 KRT15 EVPL KRT5 KRT23 LOR PRSS8 KRT8 SPRR1A KAZN TGM1 TCHH
POSITIVE_REGULATION_OF_SMOOTHENED_SIGNALING_PATHWAY	0.00168919	0.0135741	0.595187	1.82193	0	31	14	SFRP1 POR CTNNA1 GPC3 RAB34 SMO SHOX2 SCUBE1 CHSY1 DLG5 IFT80 SCUBE3 NDST1 IHH
REGULATION_OF_MACROPHAGE_MIGRATION	0.00168919	0.0135741	0.59505	1.82151	0	31	18	RARRES2 MMP14 P2RX4 C3AR1 THBS1 CSF1 SLAMF8 MAPK3 TRPV4 PTK2B STAP1 CCL5 CD200R1 P2RY12 C5AR1 TREM2 MMP28 CMKLR1
CARTILAGE_MORPHOGENESIS	0.00998336	0.0454455	0.594901	1.77829	5	27	18	COL14A1 SCARA3 COL12A1 VIT MATN2 STC1 WNT7B LRP6 HAND2 COCH VWA1 MATN4 MBL2 COL6A2 COL6A1 MSX1 SNAI1 VWA2
CELLULAR_RESPONSE_TO_FATTY_ACID	0.00164474	0.0135741	0.594773	2.01012	0	49	32	SFRP1 PPARG AKT1 GNG2 CLDN1 ACACA TNC CPT1A GNB1 PTAFR PID1 PTGFR APOB CREB1 EDN1 PTGER2 UCP1 E2F1 PDK3 CPS1 PPARGC1A CCNB1 LDLR SRC CDK4 FFAR2 P2RY6 PTGER4 SMARCD1 DGAT2 NR1H4 PRKAA1
REGULATION_OF_MEMBRANE_LIPID_DISTRIBUTION	0.00163666	0.0135741	0.594236	1.94529	0	42	23	ATP8B1 ATP10A ABCA1 ABCC1 PRELID1 P2RX7 ATP10B ATP11C ANO6 PLSCR2 ATP8B2 ATP11B TMEM30B ATP10D ATP8B4 ABCA4 PLSCR1 ANO4 KCNN4 ATP11A ATP9A ANO9 PLSCR4
EMBRYONIC_EYE_MORPHOGENESIS	0.00165563	0.0135741	0.59412	1.86652	0	34	21	EFEMP1 ALDH1A3 STRA6 FBN2 HIPK1 LRP6 PAX2 BMP7 SP3 ZEB1 KDM2B MFAP2 IHH TFAP2A FRS2 HIPK2 TWIST1 PROX1 WNT16 FOXL2 WNT5A
RESPONSE_TO_PROGESTERONE	0.00166113	0.0135741	0.594101	1.91001	0	39	18	ABHD2 CAV1 OXTR TGFB1 THBS1 DSG2 CLDN4 CD38 NCOA2 PTGER2 TYMS TSPO PTN FOSB SRC RELA GJB2 TLR2
EPITHELIAL_CELL_APOPTOTIC_PROCESS	0.0015949	0.0135741	0.594009	2.20837	0	90	46	TGFBR2 GAS6 SORT1 PRKCI ITGA4 MAP3K5 PIK3CG THBS1 SEMA5A GSN TNFAIP3 RB1 SFRP4 FGB FGA PDCD4 COL18A1 ZFP36L1 FGG ANO6 ANGPTL4 JAK2 KRT8 HIPK1 E2F1 STK4 BMPR2 BID ICAM1 CFLAR BRAF STK3 HMOX1 FOXO3 TNF PPARGC1A NFE2L2 CCL2 TEK CD40 BCL2L1 PAK4 NDNF E2F2 GATA3 ARF6
NEGATIVE_REGULATION_OF_TUMOR_NECROSIS_FACTOR_SUPERFAMILY_CYTOKINE_PRODUCTION	0.00164474	0.0135741	0.593953	2.00735	0	49	24	AXL GAS6 GPNMB IGF1 TLR4 ADIPOQ SIRPA ACP5 PTPN22 LGALS9 CD34 IRAK3 TNFAIP3 CX3CL1 LBP PTPN6 ORM1 CD274 TSPO BCL3 CIDEA ERRFI1 HAVCR2 LTF
MACROPHAGE_MIGRATION	0.00163934	0.0135741	0.593552	1.948	0	43	25	RARRES2 MMP14 P2RX4 C3AR1 THBS1 LGALS3 CX3CL1 CSF1 SLAMF8 MAPK3 TRPV4 PTK2B STAP1 CCL5 CD200R1 P2RY12 EDNRB C5AR1 ROR2 CCR2 CCL2 TREM2 MMP28 CMKLR1 MCOLN2
NEGATIVE_REGULATION_OF_G_PROTEIN_COUPLED_RECEPTOR_SIGNALING_PATHWAY	0.00165289	0.0135741	0.593178	1.9337	0	41	20	MRAP RGS2 YWHAB MET ATP2B4 GNAI2 ADM ARRB1 BICD1 CCL5 PLEK RGS14 APLN ADA ARRDC3 DNM1 RPGRIP1L STMN1 SSTR4 ARRB2
ALPHA_BETA_T_CELL_DIFFERENTIATION	0.00157729	0.0135741	0.593165	2.22108	0	94	60	TGFBR2 ANXA1 NCKAP1L SEMA4A IRF4 PLA2G2D RSAD2 LGALS9 SASH3 ATP7A SYK CD83 LY9 SPN PNP GLI3 AP3B1 RUNX3 STAT3 CD86 BCL11B BCL2 RHOA BCL3 GPR183 SH3RF1 LOXL3 BRAF ADA RUNX1 SLAMF6 IL18R1 RORA MALT1 EOMES IRF1 SOCS1 STAT6 TCF7 IHH IL18 NFKBID PRKCZ BLM GATA3 PRDM1 FOXP1 IL12RB1 CCL19 MYB TBX21 BATF PTGER4 ZFPM1 GPR18 ZAP70 AP3D1 ITPKB ITK RIPK2
GLOMERULUS_DEVELOPMENT	0.00164204	0.0135741	0.591831	2.0421	0	57	32	SULF2 PDGFRA IQGAP1 ENPEP PLCE1 PECAM1 SULF1 BASP1 ACTA2 ADIPOQ OSR1 MYO1E CD34 MTSS1 ANGPT2 WT1 NID1 WWTR1 EGR1 BCL2 CFLAR PDGFD PAX2 VANGL2 BMP7 RET TEK TCF21 PROM1 SERPINB7 PODXL MAGI2
REGULATION_OF_COAGULATION	0.00161812	0.0135741	0.591633	2.14236	0	78	43	APOE PROS1 SERPING1 PDGFRA FCER1G PLAT CAV1 LYN CD9 F2R HPSE ANXA5 SELP TLR4 ADTRP THBS1 ANXA2 F2RL1 SYK CD34 PSEN1 TFPI ABAT C1QTNF1 PDPN FGB PLG FGA CEACAM1 KRT1 KNG1 FGG ANO6 EDN1 PLEK SERPINC1 CD36 UBASH3B F3 NFE2L2 F2 THBD PLAUR
POSITIVE_REGULATION_OF_PHOSPHOLIPASE_ACTIVITY	0.00163666	0.0135741	0.59121	2.00998	0	52	38	KIT PDGFRA ESR1 LPAR1 NTRK2 ADCYAP1R1 ARF4 PTAFR GNA13 EGFR AVPR1A FGFR2 EDNRA CCL5 P2RY12 C5AR1 FGFR3 PRKCZ AGT FGF2 SELE GNA15 P2RY6 ABL2 PLCB2 ANG GPR55 ADRA1A APOC2 ITK TXK PLCG1 PDPK1 LPAR2 FGFR1 HTR2B S1PR4 NTRK3
GROWTH_PLATE_CARTILAGE_DEVELOPMENT	0.00165563	0.0135741	0.590703	1.85578	0	34	19	POR COL14A1 TGFBR2 SCARA3 COMP COL12A1 VIT MATN2 ANXA2 STC1 ZMPSTE24 THBS3 COCH COL27A1 VWA1 MATN4 MBL2 COL6A2 COL6A1
POSITIVE_REGULATION_OF_TUMOR_NECROSIS_FACTOR_SUPERFAMILY_CYTOKINE_PRODUCTION	0.00161812	0.0135741	0.590209	2.12677	0	74	35	CYBB PTPRJ FCER1G APP RIPK1 TYROBP PTAFR DHX9 TLR4 THBS1 LGALS9 SASH3 PYCARD TLR9 IFIH1 CD14 PTPRC DDX58 LRRK2 TLR3 LBP SPN ADAM8 ORM1 PF4 JAK2 CD86 CYBA CD36 CD2 TLR1 RASGRP1 HAVCR2 PTPN11 CCR2
PLATELET_AGGREGATION	0.00166113	0.0135741	0.590045	2.01016	0	54	30	CSRP1 GAS6 PDGFRA COMP CLIC1 LYN CD9 PIK3CG FERMT3 SYK RAP2B ABAT C1QTNF1 SLC7A11 PDPN FGB FGA PTPN6 STXBP1 CEACAM1 ACTG1 P2RY12 FGG PLEK FLNA UBASH3B ITGB3 TYRO3 TSPAN32 MYH9
MESODERMAL_CELL_DIFFERENTIATION	0.00494234	0.0270265	0.590019	1.78119	2	28	15	SFRP2 ITGA8 EYA2 FGFR2 TAL1 ITGA2 ITGB4 ITGB3 PAX2 ITGA3 HOXA11 ITGB1 KLF4 HMGA2 SOX17
BLOOD_VESSEL_REMODELING	0.00166945	0.0135741	0.590001	1.88191	0	38	20	AXL BGN ACE TGFB1 TGM2 ATP7A CEACAM1 RBPJ RSPO3 BCR ACVRL1 BMPR2 FGF10 FLT4 SEMA3C CCR2 AGT HRG NOS3 ABR
POSITIVE_REGULATION_OF_RECEPTOR_SIGNALING_PATHWAY_VIA_STAT	0.00160514	0.0135741	0.589952	2.1235	0	72	36	KIT IL6ST CYP1B1 IGF1 TNFRSF1A PECAM1 LYN CSF1R F2R FYN PRLR CD300A PARP14 HPX HCLS1 MGAT5 IL10RA PARP9 PTK2B CCL5 IL7R JAK2 STAT3 IL10RB FLT3 SOCS3 TNF F2 CD40 SOCS1 FGFR3 ERBB4 GHR IL18 AGT CRLF2
NEGATIVE_REGULATION_OF_CELL_SUBSTRATE_ADHESION	0.00164204	0.0135741	0.589945	2.03559	0	57	28	ACTN4 FBLN1 MAP4K4 POSTN MMP14 GCNT2 APOD ACER2 TACSTD2 ADAM15 THBS1 GBP1 ANGPT2 CORO1C CX3CL1 DLC1 PLG CASK SEMA3E FAM107A MEN1 ACVRL1 FZD4 RHOA EFNA5 RCC2 MMP12 MYOC
MEMBRANE_INVAGINATION	0.00165017	0.0135741	0.58849	2.05209	0	61	36	PPARG C3 NCKAP1L ITGAM FCER1G RAB31 FCGR2B ABCA1 ITGB2 CD300A THBS1 GSN BIN2 F2RL1 ALOX15 MSR1 ARHGAP25 STAP1 ITGA2 ANO6 DOCK1 SPIRE1 FNBP1L CD36 RHOA ELMO1 GULP1 TREM2 MYH9 RAC3 SMURF1 SNX9 MFGE8 AURKB FCHO2 AIF1
ACTIN_CYTOSKELETON_REORGANIZATION	0.0015873	0.0135741	0.588075	2.20502	0	95	51	KIT PDGFRA PARVA ANXA1 ANTXR1 EPS8 CXADR ARHGDIA CSF1R PTK7 EZR TGFB1 HCK GSN THSD7A ARHGDIB HCLS1 S1PR1 PARVG SEMA3E TRPV4 PTK2B MICALL2 STAP1 S1PR2 PLEK CD2AP SHC1 FLNA GPR65 SIPA1L1 GMFG RHOA FGF10 TRPM2 CTTN ARAP1 PTPN1 AUTS2 BAIAP2 TEK RAP2A F11R FGF7 NEDD9 MYH9 CDC42BPB RAC3 BAIAP2L1 GDPD2 FES
CARTILAGE_DEVELOPMENT_INVOLVED_IN_ENDOCHONDRAL_BONE_MORPHOGENESIS	0.00163934	0.0135741	0.587981	1.95358	0	45	26	POR COL14A1 TGFBR2 SCARA3 COMP COL12A1 SMPD3 VIT MATN2 ANXA2 SHOX2 TRPV4 STC1 ZMPSTE24 THBS3 COCH COL27A1 HOXA11 IHH TRIP11 VWA1 SERPINH1 MATN4 MBL2 COL6A2 COL6A1
MYELOID_LEUKOCYTE_CYTOKINE_PRODUCTION	0.00658979	0.0333622	0.587751	1.77435	3	28	13	KIT GAS6 FCER1G TLR4 CD74 TGFB1 IRAK3 DDX58 GPRC5B CD36 HMOX1 DDX21 NR4A3
POSITIVE_REGULATION_OF_T_CELL_PROLIFERATION	0.00161812	0.0135741	0.587583	2.1173	0	74	41	TGFBR2 ANXA1 IL6ST NCKAP1L IGF1 CARD11 TNFRSF13C LGALS9 SASH3 VCAM1 PYCARD SYK PTPRC PNP TNFSF13B CCDC88B CCL5 CD274 VTCN1 CD86 IL2RA CD4 IGFBP2 HAVCR2 CD6 CCR2 CD3E CORO1A IGF2 IL18 BLM AIF1 IL12RB1 CD276 PDCD1LG2 TRAF6 RASAL3 EBI3 SPTA1 CCL19 EFNB1
POSITIVE_REGULATION_OF_SUBSTRATE_ADHESION_DEPENDENT_CELL_SPREADING	0.00334448	0.0202656	0.58742	1.82351	1	33	15	DOCK5 PREX1 APOA1 FGB FGA MYADM FGG CALR DOCK1 FLNA BRAF MYOC S100A10 NEDD9 RAC3
REACTIVE_OXYGEN_SPECIES_BIOSYNTHETIC_PROCESS	0.0015748	0.0135741	0.587378	2.21079	0	96	54	CYBB NOX4 PTGIS CYP1B1 AKT1 CAV1 ABCD2 FYN P2RX4 PKD2 TLR4 ITGB2 SIRPA ACP5 CD34 ATP2B4 DUOX2 PTK2B EDN1 UCP1 JAK2 KLRK1 STAT3 CD47 TSPO CYBA CD36 RHOA ICAM1 CFLAR DUOXA1 SMAD3 FOXO3 TNF RORA HDAC4 RGN AGT DUOXA2 DUOX1 HSP90AA1 CX3CR1 ARG2 KLF4 NOS2 AIF1 NOS3 CTNS MMP8 RAB27A TLR6 CLU NOS1AP GCH1
NEUTROPHIL_MIGRATION	0.00157729	0.0135741	0.587149	2.17635	0	86	43	CXCL9 NCKAP1L FCER1G IL1R1 CXADR CCL8 CAMK1D PECAM1 THBS4 PIK3CG C3AR1 ITGA1 ITGB2 CD74 PREX1 BST1 LGALS3 SYK ITGA9 RAC2 CX3CL1 LBP ADAM8 SLAMF8 PF4 MOSPD2 CCL5 VAV1 EDN1 IRAK4 SLIT2 C5AR1 IL1RN PIP5K1C CCL2 MPP1 CCL7 MCOLN2 EDN3 CD177 CXCR2 WDR1 CSF3R
REGULATION_OF_LIPASE_ACTIVITY	0.00157729	0.0135741	0.586493	2.17861	0	87	55	APOC1 POR KIT ANXA8 PDGFRA SORT1 ANXA1 RGS2 ESR1 LPAR1 NTRK2 ADCYAP1R1 ARF4 PTAFR PCSK6 GNA13 PCSK5 EGFR PPT1 APOA1 AVPR1A FGFR2 EDNRA BICD1 CCL5 P2RY12 ANGPTL4 APOA2 C5AR1 RHOA APOC3 HDAC9 FGFR3 PRKCZ AGT FGF2 SELE LPL GNA15 P2RY6 ABL2 LRP1 PLCB2 LIPC ANG ANGPTL3 GPR55 ADRA1A APOC2 APOH ITK TXK SNCA APOA5 PLCG1
INTERFERON_GAMMA_PRODUCTION	0.00159236	0.0135741	0.586252	2.181	0	92	61	AXL GAS6 TLR8 TLR7 IL1R1 TLR4 SIRPA TNFRSF13C PTPN22 LGALS9 SASH3 SLC11A1 F2RL1 PYCARD TLR9 CD14 TLR3 SPN CD274 IRF8 VTCN1 KLRK1 CD47 CD2 BCL3 IL33 RASGRP1 HAVCR2 SLAMF6 RIPK3 TNF IL18R1 IL1RL1 EOMES CCR2 CD3E IL27RA CD226 CD96 PGLYRP2 IL18 GATA3 IL12RB1 CD276 AZI2 PDCD1LG2 EBI3 ZFPM1 IL20RB ISG15 NR1H4 ITK TXK RIPK2 ZC3H12A INHBA IL18RAP IL23R WNT5A PGLYRP1 FADD
RESPONSE_TO_STEROL	0.00823723	0.0397204	0.586166	1.76956	4	28	17	TGFBR2 AACS CCR5 ABCA1 SMO TGFB1 LRP6 PTCH1 RORA INSIG1 GRAMD1C LRP8 GRAMD1B ABCA2 CCL3 TGFBR1 INHBA
POSITIVE_REGULATION_OF_INTERLEUKIN_12_PRODUCTION	0.00332779	0.0202312	0.58572	1.7861	1	30	17	PLCB1 TLR4 IRF5 LGALS9 TLR9 TLR3 IRF8 MAPK11 CD36 IRF1 CD40 RELA LTB IDO1 TLR2 TRAF6 CCL19
POSITIVE_REGULATION_OF_B_CELL_MEDIATED_IMMUNITY	0.00502513	0.0272761	0.585412	1.76751	2	29	11	C3 FCER1G TGFB1 HPX PTPRC BTK MSH6 TNF CD40 STAT6 CD226
CELL_ADHESION_MEDIATED_BY_INTEGRIN	0.00162866	0.0135741	0.584068	2.04987	0	63	35	SFRP2 CYP1B1 DPP4 ITGBL1 NCKAP1L LYN ITGA4 PDE3B PIK3CG ACER2 SWAP70 FERMT3 ITGB2 SYK PTPN6 ITGA2 CCL5 P2RY12 ITGB4 FERMT1 ITGB8 ICAM1 ADA ITGB3 PTPN11 RET CD3E ITGB7 ITGA11 MUC1 NPNT RAC3 PODXL ITGB1 HRG
GRANULOCYTE_MIGRATION	0.0015873	0.0135741	0.583991	2.23658	0	106	52	CXCL9 ANXA1 RARRES2 NCKAP1L FCER1G IL1R1 CXADR CCL8 CAMK1D PECAM1 THBS4 PIK3CG IL17RC C3AR1 ITGA1 ITGB2 CD74 PREX1 CD300A THBS1 BST1 LGALS3 SYK ITGA9 RAC2 CX3CL1 LBP IL17RA CSF1 ADAM8 SLAMF8 PF4 MAPK3 TRPV4 MOSPD2 CCL5 VAV1 EDN1 IRAK4 S100A14 SLIT2 C5AR1 IL1RN PIP5K1C CCL2 MPP1 CMKLR1 CCL7 MCOLN2 EDN3 CD177 CXCR2
PLASMA_LIPOPROTEIN_PARTICLE_CLEARANCE	0.00166113	0.0135741	0.58375	1.98871	0	54	30	APOC1 APOE LIPA SOAT1 NPC2 ADIPOQ APOBR ANXA2 APOA1 MSR1 AP2B1 CSK LIPG APOB EHD1 APOA2 CD36 APOC3 HNRNPK HMOX1 MYLIP LDLR CLTA APOC4 CLTC LDLRAP1 DGAT2 LIPC NR1H4 APOC2
REGULATION_OF_CELL_ADHESION_MEDIATED_BY_INTEGRIN	0.00163934	0.0135741	0.583427	1.91477	0	43	23	SFRP2 CYP1B1 DPP4 NCKAP1L LYN PDE3B PIK3CG ACER2 SWAP70 FERMT3 SYK PTPN6 CCL5 P2RY12 FERMT1 ADA PTPN11 RET CD3E MUC1 RAC3 PODXL HRG
FATTY_ACID_DERIVATIVE_BIOSYNTHETIC_PROCESS	0.00162866	0.0135741	0.583399	1.95791	0	47	26	ACSL5 HSD17B12 AACS ACSS3 ELOVL5 ACACA SLC25A1 ELOVL4 ACLY HMGCS2 ACSL1 ALOX5AP PPT1 LTC4S HPGD ALOX15 ALOX5 ACSBG1 ELOVL6 FASN FAR1 ELOVL1 FAR2 BDH2 AWAT1 GGT1
LIPID_STORAGE	0.00164474	0.0135741	0.583338	2.05574	0	66	29	APOE PPARG C3 GM2A TTC39B NRIP1 BSCL2 CAV1 SOAT1 DGAT1 PNPLA2 ABCA1 APOA1 SREBF2 MSR1 ENPP1 APOB HEXB PLIN2 EHD1 STARD4 ACVR1C B4GALNT1 ABCG1 NFKB1 CD36 CIDEA ITGB3 TNF
REGULATION_OF_LEUKOCYTE_MIGRATION	0.00151745	0.0135741	0.58303	2.36711	0	163	88	PLCB1 GAS6 MSN ANXA1 AKT1 RARRES2 NCKAP1L CCR1 IL1R1 APP CCL8 CAMK1D NBL1 LYN ITGA4 STK39 MMP14 THBS4 PTAFR P2RX4 SMPD3 APOD ADAM10 C3AR1 SELP SWAP70 CD74 ADTRP TGFB1 LGMN CD300A THBS1 LGALS9 PLVAP BST1 LGALS3 F2RL1 PYCARD RAC2 LBP STK10 CSF1 SPN ECM1 ADAM8 SLAMF8 MAPK3 TRPV4 PTK2B THY1 STAP1 MOSPD2 ITGA2 TNFRSF14 CCL5 CD200R1 P2RY12 CALR ANO6 EDN1 DOCK8 BCR S100A14 KLRK1 CXCL12 SLIT2 C5AR1 RHOA …
MAMMARY_GLAND_MORPHOGENESIS	0.00163934	0.0135741	0.582519	1.91179	0	43	23	TGFBR2 ESR1 CAV1 CSF1R NTN1 TGFB1 VDR FGFR2 PGR CSF1 GLI3 LRP6 FGF10 IGFBP5 PTCH1 ARG1 SOSTDC1 AREG ELF3 MSX2 PML STAT6 SRC
B_CELL_PROLIFERATION	0.00160772	0.0135741	0.582407	2.10156	0	73	34	NCKAP1L TYROBP LYN FCGR2B TLR4 CD180 MNDA CD74 CARD11 CD300A TNFRSF13C INPP5D BST1 SASH3 TLR9 IKZF3 PTPRC AHR ATM CD38 CASP3 BTK MS4A1 TNFSF13B IRS2 IL7R IL7 BCL2 GPR183 CD81 ADA CD79A SLC39A10 CD40
POSITIVE_REGULATION_OF_LEUKOCYTE_MIGRATION	0.00156986	0.0135741	0.582282	2.24063	0	110	60	GAS6 RARRES2 NCKAP1L CCR1 IL1R1 APP CCL8 CAMK1D ITGA4 STK39 MMP14 THBS4 PTAFR P2RX4 ADAM10 C3AR1 SELP SWAP70 CD74 TGFB1 LGMN THBS1 LGALS9 PLVAP LGALS3 F2RL1 PYCARD RAC2 LBP CSF1 SPN ADAM8 MAPK3 TRPV4 PTK2B THY1 MOSPD2 ITGA2 TNFRSF14 CCL5 P2RY12 CALR ANO6 EDN1 DOCK8 S100A14 CXCL12 C5AR1 RHOA ICAM1 PDGFD TNF CCR2 TREM2 CMKLR1 CCL7 EDN3 FPR2 CCR6 CXCR2
CHONDROCYTE_DIFFERENTIATION_INVOLVED_IN_ENDOCHONDRAL_BONE_MORPHOGENESIS	0.00502513	0.0272761	0.582117	1.75756	2	29	17	COL14A1 TGFBR2 SCARA3 COL12A1 SMPD3 VIT MATN2 COCH COL27A1 IHH TRIP11 VWA1 SERPINH1 MATN4 MBL2 COL6A2 COL6A1
TISSUE_REMODELING	0.00156986	0.0135741	0.581576	2.30965	0	145	72	SFRP1 AXL NOX4 LEPR MERTK BGN RASSF2 ANXA1 GPNMB LIPA CAV1 ACE CSF1R MMP14 F2R THBS4 TGFB1 TGM2 ACP5 INPP5D EGFR ATP7A SYK P2RX7 RAB3D SNX10 VDR RAC2 TNFAIP3 LRRK1 CSK S1PR1 PLG MMP2 CD38 ADAM8 CEACAM1 RBPJ PTK2B TPH1 RSPO3 BCR EFNA4 NOTCH2 IL7 ACVRL1 GDF5 LRP6 SUCO HAND2 BMPR2 FGF10 IGFBP5 GJA1 HIF1A ROCK1 FLT4 SEMA3C UBASH3B ITGB3 ARG1 CCR2 ELF3 TNFRSF11B GJA5 SRC IHH IL18 AGT PTH1R GREM1 HRG
LYMPHOCYTE_CHEMOTAXIS	0.00165017	0.0135741	0.580731	1.92184	0	44	34	GAS6 CCL8 STK39 PIK3CG ADAM10 CX3CL1 CXCL16 ADAM8 PTK2B CCL5 KLRK1 GPR183 CCR2 CCL2 HSD3B7 CCL7 CH25H CXCR3 CKLF CCL19 CYP7B1 TNFSF14 ADAM17 CCL22 CCL3 CCL4 SAA1 CXCL10 WNK1 CCL24 WNT5A CCL11 CXCL13 PIK3CD
PHOSPHOLIPID_TRANSPORT	0.00162602	0.0135741	0.580723	2.10956	0	79	42	APOC1 APOE ATP8B1 NPC2 GLTP ATP10A ABCA1 ABCC1 PRELID1 PITPNM1 PLTP APOA1 P2RX7 ATP10B MFSD2A ATP11C OSBPL5 ANO6 PLSCR2 APOA2 ATP8B2 ABCG1 ATP11B APOC3 ABCA12 TMEM30B PLEKHA3 ATP10D ATP8B4 MTTP LDLR ABCA4 PLSCR1 ANO4 KCNN4 OSBPL10 ATP11A ATP9A ANO9 PITPNB PLSCR4 TNFAIP8L3
RESPONSE_TO_TYPE_I_INTERFERON	0.00164204	0.0135741	0.58056	2.05662	0	69	42	IFITM2 ZBP1 ISG20 IRF6 IRF4 PSMB8 IFITM3 IFIT2 RSAD2 IRF5 IRF7 GBP2 IFNAR2 RNASEL NLRC5 BST2 SAMHD1 PTPN6 EGR1 IFITM1 STAT1 IRF9 OAS3 TRIM56 IRF8 ADAR USP18 IFIT1 MMP12 PTPN11 PTPN1 IRF1 DCST1 SETD2 SP100 TBK1 MYD88 OAS2 JAK1 IRF2 IFIT3 ISG15
INTEGRIN_MEDIATED_SIGNALING_PATHWAY	0.00159236	0.0135741	0.580142	2.15827	0	92	48	ITGA6 CTNNA1 ITGBL1 ITGAM FCER1G TYROBP ITGA4 ITGA8 ADAM10 ZYX FERMT3 ITGA1 ITGB2 ADAM15 HCK BST1 EMP2 SYK APOA1 ITGA9 PLP1 CEACAM1 FGR PTK2B THY1 ITGA2 VAV1 PLEK DOCK1 ITGB4 FERMT1 CD47 FLNA ITGB8 LOXL3 ITGAX RCC2 ITGB3 PTPN11 ITGB7 ITGA11 ITGAL TSPAN32 NEDD9 MYH9 ITGA3 CD177 SRC
NEGATIVE_REGULATION_OF_INNATE_IMMUNE_RESPONSE	0.00166667	0.0135741	0.579422	1.87286	0	40	23	PPARG SERPING1 GRN LGALS9 PARP14 IRAK3 NLRC5 TNFAIP3 SAMHD1 CEACAM1 SLAMF8 VSIG4 SERPINB9 HAVCR2 MMP12 ARG1 NMI TYRO3 DCST1 CD96 A2M OTOP1 DHX58
REGULATION_OF_EXTRINSIC_APOPTOTIC_SIGNALING_PATHWAY_VIA_DEATH_DOMAIN_RECEPTORS	0.00165289	0.0135741	0.579299	1.96012	0	50	30	SFRP1 SFRP2 RIPK1 TIMP3 THBS1 CASP8 LGALS3 TNFAIP3 HGF FGB FGA FGG STK4 ICAM1 CFLAR STK3 HMOX1 SKIL HMGB2 MAL BRCA1 BCL2L1 PMAIP1 PTEN BMP5 BMPR1B ATF3 SP100 TNFSF10 NOS3
REGULATION_OF_LEUKOCYTE_PROLIFERATION	0.00154799	0.0135741	0.577049	2.39305	0	186	101	TGFBR2 ANXA1 IL6ST GPNMB NCKAP1L IGF1 TNFRSF1B CCL8 TYROBP LYN TWSG1 PLA2G2D FCGR2B ENPP3 TLR4 MNDA PDE5A CD74 TGFB1 CARD11 CD300A TNFRSF13C PTPN22 INPP5D LGALS9 BST1 SASH3 VCAM1 LGALS3 PYCARD SYK TLR9 RAC2 IKZF3 TNFAIP3 PTPRC AHR ATM PTPN6 CSF1 CD38 SPN PNP CASP3 BTK TNFSF13B CCDC88B TNFRSF14 CCL5 CD274 IRS2 MAPK8IP1 VTCN1 IL7 VSIG4 CD86 IL2RA BCL2 FGF10 CD4 GPR183 SH3RF1 IGFBP2 CD81 PLA2G2F ADA…
INTERLEUKIN_6_PRODUCTION	0.00155521	0.0135741	0.57651	2.24764	0	121	76	GAS6 IL1RL2 TLR8 NCKAP1L TLR7 FCER1G APP MBP TYROBP F2R PTAFR DHX9 IL17RC TLR4 SIRPA PTPN22 INPP5D LGALS9 F2RL1 PYCARD P2RX7 IRAK3 TLR9 IFIH1 TNFAIP3 IL1RAP ADORA2B CX3CL1 HGF DDX58 CSK TLR3 LBP PTPN6 ORM1 TRPV4 ARRB1 AFAP1L2 C1QTNF3 CD200R1 BANK1 CAPN2 STAT3 CD47 CYBA CD36 MAPK13 IL33 TLR1 IL1RN HAVCR2 PTPN11 TNF TREM2 IL18 TLR2 GBA MYD88 NOS2 AIF1 AZI2 TWIST1 TRAF6 MMP8 TLR6 NR1H4 ARRB2 KLF2 RI…
CD4_POSITIVE_ALPHA_BETA_T_CELL_ACTIVATION	0.00162866	0.0135741	0.575647	2.09775	0	81	43	TGFBR2 ANXA1 NCKAP1L SEMA4A IRF4 TWSG1 PLA2G2D RSAD2 LGALS9 SASH3 ATP7A CD83 LY9 SPN CD274 RUNX3 STAT3 CD86 BCL3 GPR183 SH3RF1 LOXL3 BRAF RUNX1 SLAMF6 IL18R1 RORA MALT1 SOCS1 STAT6 IL18 NFKBID PRKCZ GATA3 ARG2 FOXP1 IL12RB1 CCL19 MYB TBX21 BATF PTGER4 ZFPM1
EXTRACELLULAR_MATRIX_DISASSEMBLY	0.00163934	0.0135741	0.57539	2.03464	0	68	40	TIMP2 DDR2 SH3PXD2B CD44 DPP4 MMP14 CMA1 ADAM10 CTSS ADAM15 TGFB1 MMP19 LCP1 PDPN PLG MMP2 ADAM8 KLK7 MMP3 CAPN2 TLL1 MMP15 SCUBE1 MMP12 ADAMTS4 SCUBE3 TPSAB1 A2M CAPNS2 CTSL HTRA1 TMPRSS6 MMP8 LRP1 MMP9 TIMP1 LAMC1 CTSK KIF9 MMP16
REGULATION_OF_TISSUE_REMODELING	0.00162866	0.0135741	0.575321	2.01917	0	63	30	SFRP1 LEPR GPNMB CSF1R THBS4 TGFB1 INPP5D EGFR SYK P2RX7 VDR TNFAIP3 CSK S1PR1 CD38 ADAM8 CEACAM1 BCR SUCO HAND2 ROCK1 FLT4 UBASH3B ITGB3 TNFRSF11B SRC IL18 AGT GREM1 HRG
CHEMOKINE_PRODUCTION	0.00160514	0.0135741	0.575267	2.07065	0	72	44	POSTN TLR7 APP MBP CSF1R APOD TLR4 CD74 ADIPOQ SIRPA LGALS9 F2RL1 PYCARD TLR9 ADORA2B TLR3 LBP EGR1 TRPV4 C1QTNF3 IL7 EIF2AK2 IL33 HIF1A HMOX1 HAVCR2 TNF IL1RL1 TREM2 MCOLN2 IL18 FFAR2 TLR2 ARG2 KLF4 FOXP1 AIF1 TWIST1 LPL LRP1 ZFPM1 ADAM17 S100A8 NR1H4
NEGATIVE_REGULATION_OF_LEUKOCYTE_MIGRATION	0.00166945	0.0135741	0.575074	1.8343	0	38	24	PLCB1 AKT1 NBL1 APOD ADTRP CD300A SLAMF8 STAP1 CD200R1 BCR KLRK1 CXCL12 SLIT2 IL33 ADA HMOX1 LRCH1 CCL2 MMP28 BMP5 GREM1 ABR PTGER4 GPR18
COLLAGEN_CATABOLIC_PROCESS	0.00166113	0.0135741	0.574991	1.84857	0	39	26	CTSB MMP14 CTSS ADAMTS2 ADAM15 MMP19 ADAMTS3 MMP2 MMP3 MMP15 MMP12 MMP28 CTSL ITGB1 PEPD MMP17 TMPRSS6 MMP8 MMP9 CTSK MMP16 FAP COL13A1 MMP25 PRTN3 COL15A1
B_CELL_RECEPTOR_SIGNALING_PATHWAY	0.00166945	0.0135741	0.574821	1.95142	0	53	36	NCKAP1L LYN FCGR2B PRKCB MNDA PLCG2 CMTM3 CD300A PTPN22 NFAM1 SYK PTPRC PTPN6 CD38 BTK ELF1 STAP1 KLHL6 BCL2 BLK PAX5 CD79B LCK RUNX1 CD79A SLC39A10 PRKCH CD22 FOXP1 CD19 BMX RFTN1 ITK VAV3 CTLA4 GCSAM
REGULATION_OF_BONE_REMODELING	0.00165289	0.0135741	0.574537	1.87293	0	41	18	SFRP1 LEPR CSF1R INPP5D EGFR SYK P2RX7 TNFAIP3 CSK S1PR1 CD38 ADAM8 SUCO UBASH3B ITGB3 TNFRSF11B SRC GREM1
OVULATION_CYCLE	0.00163399	0.0135741	0.573564	1.98711	0	59	24	AXL PDGFRA SGPL1 NRIP1 SLIT3 ESR1 PAM SERPINF1 OXTR MMP19 EGFR RETN PGR EGR1 CASP3 ARRB1 FZD4 PTN SLIT2 FOXO3 TYRO3 HAS1 SRC BMPR1B
ENDOCRINE_PROCESS	0.00164474	0.0135741	0.573171	2.02232	0	67	32	MME FAM129B RAB8B ENPEP ACE F2R CMA1 OXTR PCSK5 F2RL1 RAB11FIP1 RETN AVPR1A CPA3 C1QTNF1 C1QTNF3 EDN1 INHBB FZD4 APLN CYBA RHOA PTPN11 ECE1 KRAS CTSZ GJA5 EDN3 SERPINF2 AGT GATA3 HSD11B2
VITAMIN_TRANSPORT	0.00499168	0.0271547	0.572823	1.74677	2	30	14	TCN2 FOLR2 ABCC1 APOA1 GC STRA6 SLC25A32 SLC46A1 SLC52A3 SLC23A2 SLC23A1 SLC2A1 LRP2 TTPA
ARACHIDONIC_ACID_METABOLIC_PROCESS	0.00331126	0.0202312	0.572484	1.76826	1	32	15	PTGIS CYP1B1 MGLL PLA2G4A TBXAS1 ALOX15 HPGDS FAAH MAPK3 CYP2S1 PTGS1 PTGES CYP2E1 AWAT1 EPHX2
INOSITOL_PHOSPHATE_BIOSYNTHETIC_PROCESS	0.00166113	0.0135741	0.572106	1.8393	0	39	21	PLCB1 PLCE1 ADCYAP1R1 PTAFR PLCG2 PLCB3 PTK2B PLCB4 PLEK PPIP5K2 PTH1R FGF2 ITPKA PLCD3 P2RY6 PLCB2 ITPKC ITPKB PLCH2 SNCA PLCG1
BONE_REMODELING	0.00164204	0.0135741	0.57167	2.06317	0	77	36	SFRP1 NOX4 LEPR RASSF2 CSF1R TGFB1 ACP5 INPP5D EGFR SYK P2RX7 RAB3D SNX10 RAC2 TNFAIP3 LRRK1 CSK S1PR1 CD38 ADAM8 PTK2B TPH1 EFNA4 NOTCH2 IL7 GDF5 LRP6 SUCO GJA1 UBASH3B ITGB3 TNFRSF11B SRC IHH PTH1R GREM1
HEPARAN_SULFATE_PROTEOGLYCAN_METABOLIC_PROCESS	0.00163132	0.0135741	0.57133	1.80958	0	35	18	SULF2 DSE UGDH SULF1 HPSE EXT1 HS3ST3B1 HS3ST1 HS2ST1 SGSH VANGL2 GLCE NDST1 HS3ST3A1 CSGALNACT1 XYLT2 NDST2 XYLT1
REGULATION_OF_VASOCONSTRICTION	0.00166945	0.0135741	0.571244	1.93927	0	53	28	AKT1 CAV1 ACE F2R PTAFR DOCK5 OXTR EGFR ADM AVPR1A FGB FGA CD38 FGG EDN1 ARHGAP42 APLN BMPR2 RHOA ICAM1 KCNMB4 ECE1 CASR HRH2 GJA5 EDN3 ADRA2C AGT
BONE_GROWTH	0.00163934	0.0135741	0.570322	1.89491	0	45	21	POR COL14A1 TGFBR2 DDR2 SCARA3 LEPR COMP COL12A1 SMPD3 VIT MATN2 ANXA2 FGFR2 ECM1 STC1 ZMPSTE24 THBS3 COCH COL27A1 MSX2 FGFR3
LEUKOCYTE_MEDIATED_CYTOTOXICITY	0.00162338	0.0135741	0.570237	2.05632	0	75	35	B2M CTSH ITGAM CTSC TYROBP FCGR2B DNASE1L3 LGALS9 EMP2 SLAMF7 F2RL1 P2RX7 PTPRC STXBP2 PTPN6 CEACAM1 STAP1 VAV1 IL7R GZMB KLRK1 LAG3 PRF1 ICAM1 SERPINB9 RASGRP1 HAVCR2 ARG1 AP1G1 SLAMF6 RIPK3 F2 CORO1A LYST CD226
NEUROTRANSMITTER_METABOLIC_PROCESS	0.0015873	0.0135741	0.570184	2.20455	0	116	59	POR CHDH PTGIS CYP1B1 AKT1 HDC BCHE DPYD CAV1 P2RX4 PKD2 TLR4 ITGB2 SIRPA ACP5 MOXD1 ATP7A BHMT CD34 ATP2B4 SARDH SLC44A1 ABAT SLC6A4 NAALAD2 PTK2B TPH1 EDN1 ALDH9A1 JAK2 KLRK1 CD47 TSPO CD36 ICAM1 UPB1 ENPP6 SMAD3 CPS1 PAH TNF RORA SLC44A4 RGN AGT HSP90AA1 TLR2 CX3CR1 ARG2 KLF4 SRD5A1 NOS2 AIF1 NOS3 MMP8 TLR6 CLU NOS1AP GCH1
MACROPHAGE_ACTIVATION	0.00162602	0.0135741	0.569501	2.06879	0	79	43	TLR8 ITGAM TLR7 APP GRN TYROBP C1QA FCGR2B TLR4 ITGB2 CD74 THBS1 SLC11A1 SYK CEBPA PTPRC CX3CL1 ATM LRRK2 TLR3 LBP MFHAS1 STAP1 SBNO2 VSIG4 C5AR1 IL33 TLR1 HAVCR2 TNF IL1RL1 RORA TREM2 LDLR SHPK FPR2 TTBK1 TLR2 FOXP1 AIF1 MMP8 TLR6 CLU
POSITIVE_REGULATION_OF_CELL_SUBSTRATE_ADHESION	0.00156986	0.0135741	0.568466	2.19271	0	112	55	MMRN1 SFRP1 PTPRJ MAP4K4 HSD17B12 ITGA6 IQGAP1 ABI3BP VIT DOCK5 PREX1 RSU1 EMP2 APOA1 ALOX15 CX3CL1 NID1 ECM2 UTRN EMILIN2 FGB FGA CSF1 MYADM PTK2B THY1 EDIL3 FN1 FGG CALR DOCK1 JAK2 PPM1F FERMT1 EGFL6 FLNA PTN VWC2 CD36 ROCK1 BRAF SMAD3 MYOC NINJ1 TEK FMN1 S100A10 CD3E PLEKHA2 NEDD9 ITGA3 NPNT NDNF RAC3 PRKCZ
PLATELET_DERIVED_GROWTH_FACTOR_RECEPTOR_SIGNALING_PATHWAY	0.00166113	0.0135741	0.568289	1.93604	0	54	27	PTPRJ LOX PIK3C2A PDGFRA SGPL1 PDGFC IQGAP1 PLAT SMPD3 APOD ARID5B ADIPOQ MYO1E CBL PTPN12 BCR JAK2 RGS14 F3 PDGFD PTPN11 PTPN1 NR4A3 SLC9A3R1 MYOCD SRC PTEN
NEGATIVE_REGULATION_OF_ANIMAL_ORGAN_MORPHOGENESIS	0.00334448	0.0202656	0.567989	1.76319	1	33	20	SULF1 TACSTD2 CEACAM1 STAT1 BCL2 CHAD BMPR2 ASPN TNF PAX2 BMP7 TNFRSF11B DIO3 CITED1 GATA3 GREM1 NOTCH1 FOXC1 HNF1B PAX8
POSITIVE_REGULATION_OF_INTERLEUKIN_1_PRODUCTION	0.00166113	0.0135741	0.567774	1.82537	0	39	25	TLR8 APP TYROBP TLR4 LGALS9 PYCARD CASP1 P2RX7 EGR1 ORM1 HK1 JAK2 HAVCR2 SMAD3 AIM2 USP50 CCL19 RIPK2 CCL3 SAA1 GSDMD LILRA5 NLRP10 WNT5A NOD1
POSITIVE_REGULATION_OF_CYTOKINE_PRODUCTION_INVOLVED_IN_IMMUNE_RESPONSE	0.00166389	0.0135741	0.567512	1.88549	0	46	25	B2M FCER1G IL1R1 TLR4 RSAD2 CD74 SASH3 F2RL1 DDX58 GPRC5B MAPK3 TNFRSF14 HK1 CD36 IL18R1 MALT1 DDX21 NR4A3 CD226 IL18 FFAR2 PRKCZ GATA3 TRAF6 SEMA7A
LEUKOCYTE_MIGRATION	0.00145138	0.0135741	0.56743	2.49749	0	363	200	CXCL9 KIT PLCB1 GAS6 PROS1 MSN MERTK EPCAM CD44 ITGA6 ANXA1 AKT1 RARRES2 NCKAP1L ITGAM EPS8 GCNT1 CCR1 CCR5 FCER1G IL1R1 APP CXADR CAV1 CCL8 CAMK1D PECAM1 NBL1 LYN ITGA4 STK39 MMP14 THBS4 FYN PTAFR P2RX4 PIK3CG SMPD3 APOD IL17RC ADAM10 SELPLG C3AR1 SELP SWAP70 ITGA1 ITGB2 CD74 ADTRP TGFB1 LGMN SIRPA SDC2 PREX1 CD300A THBS1 INPP5D LGALS9 PLVAP HCK BST1 VCAM1 LGALS3 F2RL1 PYCARD SYK DOK2 CD34 ANGPT…
RESPONSE_TO_INTERLEUKIN_4	0.00334448	0.0202656	0.567023	1.76019	1	33	20	MRC1 IL2RG PARP14 FASN CD300LF RPL3 ARG1 CORO1A PML STAT6 TCF7 SHPK RUFY4 CDK4 CITED1 MCM2 GATA3 HSPA5 TUBA1B XBP1
POSITIVE_REGULATION_OF_CYTOKINE_SECRETION	0.0016	0.0135741	0.566953	2.17354	0	109	72	TLR8 POSTN MBP CSF1R F2R DHX9 IL17RC TLR4 PTPN22 LGALS9 F2RL1 PYCARD SYK CASP1 CD34 P2RX7 IFIH1 IL1RAP CD14 DDX58 LRRK2 IL17RA FGR ORM1 MAPK3 IL17RB TRPV4 SCAMP5 C1QTNF3 TNFRSF14 CD274 VTCN1 HK1 SPTBN1 MAPK11 FERMT1 CLEC9A CD2 IL33 TLR1 CLEC5A RASGRP1 HAVCR2 MMP12 TNF IL1RL1 AIM2 SRC FFAR2 PRKCZ CRLF2 CLEC4E GATA3 TLR2 USP50 AIF1 TWIST1 LPL CCL19 MMP8 PTGER4 LRP1 IL1A TRIM6 RIPK2 XBP1 CCL3 CADM1 …
NEGATIVE_REGULATION_OF_LEUKOCYTE_APOPTOTIC_PROCESS	0.00165017	0.0135741	0.566555	1.87493	0	44	24	AXL GAS6 MERTK CCR5 FCER1G CD74 IRF7 HCLS1 CCL5 IRS2 DOCK8 IL7R CXCL12 HIF1A ADA SLC39A10 CXCR2 BLM IDO1 AURKB CD27 ARG2 FOXP1 CCL19
REGULATION_OF_ALPHA_BETA_T_CELL_DIFFERENTIATION	0.00164204	0.0135741	0.566097	1.95258	0	58	38	TGFBR2 ANXA1 NCKAP1L IRF4 LGALS9 SASH3 SYK CD83 PNP GLI3 AP3B1 RUNX3 CD86 RHOA SH3RF1 LOXL3 ADA RUNX1 MALT1 SOCS1 IHH IL18 NFKBID PRKCZ GATA3 PRDM1 IL12RB1 CCL19 MYB TBX21 ZAP70 AP3D1 ITPKB RIPK2 ZC3H12A CD80 NFKBIZ IL23R
POSITIVE_REGULATION_OF_RESPONSE_TO_CYTOKINE_STIMULUS	0.00166945	0.0135741	0.56594	1.92127	0	53	32	AXL GAS6 TRIM44 ZBP1 IL1R1 RIPK1 DHX9 TLR4 CD74 IRF7 PARP14 HPX CASP1 TICAM2 NLRC5 IFIH1 AGPAT2 DDX58 CSF1 PARP9 CD300LF EDN1 CASP4 IL7 CREBRF HIF1A MMP12 TREM2 GFI1 CPNE1 TBK1 TLR2
NEGATIVE_REGULATION_OF_BLOOD_VESSEL_DIAMETER	0.00160772	0.0135741	0.565936	2.04213	0	73	36	PIK3C2A COMP AKT1 CAV1 ACE F2R PTAFR DOCK5 OXTR ACTA2 EGFR ADM AVPR1A HMGCR SLC6A4 FGB FGA CD38 EDNRA FGG EDN1 EDNRB ARHGAP42 APLN BMPR2 BBS2 RHOA ICAM1 KCNMB4 ECE1 CASR HRH2 GJA5 EDN3 ADRA2C AGT
REGULATION_OF_EPITHELIAL_CELL_APOPTOTIC_PROCESS	0.00164474	0.0135741	0.565646	1.99577	0	67	31	GAS6 SORT1 PRKCI ITGA4 THBS1 SEMA5A GSN TNFAIP3 SFRP4 FGB FGA PDCD4 COL18A1 ZFP36L1 FGG ANO6 ANGPTL4 JAK2 ICAM1 CFLAR BRAF HMOX1 FOXO3 TNF PPARGC1A NFE2L2 CCL2 TEK CD40 PAK4 NDNF
CYTOKINE_SECRETION	0.00157233	0.0135741	0.565142	2.31429	0	178	115	GAS6 ANXA1 TLR8 POSTN TNFRSF1B MBP LYN CSF1R SRGN F2R DHX9 IL17RC FCGR2B EZR TLR4 TLR5 ABCA1 CARD11 PTPN22 LGALS9 F2RL1 PYCARD SYK APOA1 GBP1 CASP1 CD34 P2RX7 CHI3L1 TLR9 IFIH1 TNFAIP3 IL1RAP CD14 LCP2 CX3CL1 DDX58 LRRK2 IL17RA PNP FGR ORM1 MAPK3 IL17RB TRPV4 RBPJ SCAMP5 C1QTNF3 FFAR4 TNFRSF14 CD200R1 CD274 IL1R2 FN1 BANK1 VTCN1 HK1 APOA2 SPTBN1 MAPK11 FERMT1 CLEC9A CD36 CD2 CIDEA IL33 GBP5 TLR1 …
POSITIVE_REGULATION_OF_SMALL_GTPASE_MEDIATED_SIGNAL_TRANSDUCTION	0.00162866	0.0135741	0.565041	1.98309	0	63	35	MAP4K4 IGF1 LPAR1 LYN ADCYAP1R1 F2R F2RL1 APOA1 RELN CSF1 ARRB1 VAV1 ROBO1 IRS2 P2RY10 NOTCH2 SHC1 JAK2 GPR65 FGF10 RASGRP1 CDON GPR174 AUTS2 KRAS LPAR6 SRC AKAP13 MMD2 F2RL2 GPR35 GPR18 GPR55 ITPKB NOTCH1
POSITIVE_REGULATION_OF_INTERLEUKIN_8_PRODUCTION	0.00163934	0.0135741	0.565025	1.85437	0	43	20	TLR8 TLR7 RIPK1 F2R TLR4 TLR5 ADIPOQ LGALS9 F2RL1 PYCARD TLR9 CD14 DDX58 TLR3 LBP AFAP1L2 APOA2 CD2 TLR1 TNF
NEGATIVE_REGULATION_OF_CELL_MATRIX_ADHESION	0.00326264	0.0202312	0.56499	1.78951	1	35	21	MAP4K4 POSTN MMP14 APOD ACER2 ADAM15 THBS1 CORO1C DLC1 CASK SEMA3E FAM107A ACVRL1 RCC2 MMP12 MYOC SRC PTEN ARHGAP6 PHLDB2 LRP1
T_CELL_DIFFERENTIATION_INVOLVED_IN_IMMUNE_RESPONSE	0.00165017	0.0135741	0.56468	1.96907	0	61	38	ANXA1 FCER1G SEMA4A IRF4 LGALS9 ATP7A LY9 SPN STAT3 CD86 BCL3 GPR183 LOXL3 SLAMF6 IL18R1 RORA MALT1 EOMES STAT6 IL18 NFKBID PRKCZ CLEC4E GATA3 FOXP1 IL12RB1 CCL19 MYB TBX21 BATF PTGER4 ZFPM1 CLEC4D RIPK2 ZC3H12A CD80 NFKBIZ IL23R
RESPONSE_TO_INTERFERON_GAMMA	0.00154083	0.0135741	0.564671	2.26502	0	150	86	IFITM2 IFNGR1 PPARG MRC1 CD44 B2M CLDN1 IRF6 CCL8 IRF4 MYO1C PTAFR EVL IFITM3 FLNB TLR4 ZYX VIM RAB43 IRF5 CIITA SIRPA IRF7 LGALS9 HCK GSN UBD VCAM1 PARP14 GBP2 SLC11A1 HPX IFI30 GBP1 CASP1 NLRC5 BST2 CX3CL1 STXBP2 TLR3 STXBP1 CXCL16 DAPK1 IFITM1 PARP9 ACTG1 STAT1 IRF9 TRIM21 OAS3 CDC42EP4 CCL5 WAS ACTR3 EDN1 IRF8 JAK2 CD47 ICAM1 SOCS3 SEC61A1 GBP5 GBP6 ARG1 NMI IRF1 CCL2 NCAM1 CD40 SOCS1 PML CCL…
POSITIVE_REGULATION_OF_TYROSINE_PHOSPHORYLATION_OF_STAT_PROTEIN	0.00166113	0.0135741	0.564083	1.92171	0	54	23	KIT IL6ST IGF1 TNFRSF1A PECAM1 LYN CSF1R FYN PARP14 HPX HCLS1 PARP9 CCL5 JAK2 STAT3 FLT3 SOCS3 TNF CD40 FGFR3 ERBB4 GHR IL18
BONE_RESORPTION	0.00166945	0.0135741	0.563888	1.9143	0	53	28	NOX4 CSF1R ACP5 INPP5D EGFR SYK P2RX7 RAB3D SNX10 RAC2 TNFAIP3 LRRK1 CSK S1PR1 CD38 ADAM8 PTK2B IL7 UBASH3B ITGB3 TNFRSF11B SRC IHH PTH1R TRAF6 CTSK GPR55 TNFRSF11A
PEPTIDYL_TYROSINE_AUTOPHOSPHORYLATION	0.00168634	0.0135741	0.563756	1.78343	0	37	23	IQGAP1 CAV1 ACE LYN FYN SLA HCK EGFR BTK FGR MAPK3 PTK2B FRK BLK LCK SRC GREM1 ABL2 KDR BMX ITK TXK DDR1
POSITIVE_REGULATION_OF_ADAPTIVE_IMMUNE_RESPONSE	0.00160514	0.0135741	0.563257	2.05799	0	80	37	C3 B2M ANXA1 IL6ST FCER1G IL1R1 RSAD2 TGFB1 TNFRSF13C SASH3 SLC11A1 HPX PYCARD P2RX7 PTPRC BTK TNFSF13B CD274 MSH6 CD4 ADA TNF IL18R1 MALT1 CCR2 CD40 IL27RA STAT6 CD226 IL18 NFKBID PRKCZ GATA3 IL12RB1 TRAF6 CCL19 TBX21
REGULATION_OF_SMOOTH_MUSCLE_CONTRACTION	0.00166945	0.0135741	0.563165	1.91185	0	53	23	KIT RGS2 CAV1 PLCE1 F2R PTAFR DOCK5 OXTR ADORA2B ABAT CALCRL CNN1 ITGA2 EDN1 ARHGAP42 RHOA ADA CTTN NPNT SPHK1 MYOCD ADRA2C TACR1
LEUKOCYTE_PROLIFERATION	0.00154083	0.0135741	0.563109	2.37135	0	238	129	TGFBR2 KIT MSN ANXA1 IL6ST GPNMB NCKAP1L IGF1 TNFRSF1B CCL8 ACE TYROBP LYN CSF1R TWSG1 FYN PIK3CG PLA2G2D FCGR2B ENPP3 TLR4 CCND3 CD180 MNDA PDE5A CD74 TGFB1 CARD11 CD300A TNFRSF13C PTPN22 INPP5D LGALS9 BST1 SASH3 VCAM1 LGALS3 SLC11A1 F2RL1 PYCARD SYK P2RX7 TLR9 RAC2 IKZF3 TNFAIP3 PTPRC CX3CL1 AHR ATM DOCK2 PTPN6 CSF1 CD38 SPN PNP CASP3 BTK MS4A1 TNFSF13B CCDC88B TNFRSF14 CCL5 CD274 ELF4 IRS2 DOC…
CELLULAR_RESPONSE_TO_VITAMIN	0.00831947	0.0399074	0.562976	1.71674	4	30	13	SFRP1 PPARG GAS6 POSTN TNC FOLR2 PENK VDR PTN BRIP1 CASR FES ATP2B1
SMOOTH_MUSCLE_CONTRACTION	0.00158983	0.0135741	0.562538	2.0935	0	91	39	SULF2 KIT PIK3C2A COMP RGS2 CAV1 PLCE1 F2R SULF1 PTAFR DOCK5 OXTR ACTA2 PTGER3 ADORA2B ABAT TIFAB CD38 EDNRA CALCRL CNN1 ITGA2 EDN1 EDNRB ARHGAP42 BBS2 RHOA ROCK1 ADA MYLK CTTN EDN3 NPNT SPHK1 GDNF MYOCD ADRA2C AGT TACR1
EMBRYONIC_CAMERA_TYPE_EYE_DEVELOPMENT	0.00168634	0.0135741	0.562383	1.77909	0	37	23	ALDH1A3 STRA6 ALDH1A2 HIPK1 LRP6 FGF10 PAX2 BMP7 SP3 ZEB1 KDM2B WDR19 IHH TFAP2A FRS2 HIPK2 TWIST1 PROX1 WNT16 WNT5A FOXF2 IFT140 PHACTR4
TRIGLYCERIDE_METABOLIC_PROCESS	0.00494234	0.0270265	0.561587	1.78045	2	36	23	APOC1 APOE CAV1 CPT1A DGAT1 APOBR APOBEC1 APOB CAT SEL1L APOA2 APOC3 CYP2E1 PTPN11 INSIG1 GK5 SERPINA12 LPL SLC22A4 GPX1 APOH SLC27A5 APOA5
POSITIVE_REGULATION_OF_EXTRINSIC_APOPTOTIC_SIGNALING_PATHWAY	0.00163934	0.0135741	0.560257	1.86146	0	45	24	SFRP1 CTNNA1 CAV1 RIPK1 PDIA3 TIMP3 PPP2R1B THBS1 PYCARD PTPRC PAK2 SRPX STK4 BID STK3 SKIL MAL RET PML PMAIP1 PTEN BMPR1B ATF3 AGT
RECEPTOR_CATABOLIC_PROCESS	0.00331126	0.0202312	0.560149	1.73016	1	32	16	APOE NEDD4 TGFB1 LGMN ANXA2 DTX3L AP2B1 UVRAG ITCH PTPN1 MYLIP CLTA SMURF1 MTMR2 ZNRF3 CLTC
ACUTE_PHASE_RESPONSE	0.00166113	0.0135741	0.560113	1.80074	0	39	22	CD163 AHSG PTGER3 HP F8 LBP ORM1 FN1 EDNRB STAT3 ITIH4 TNF F2 PLSCR1 CNR1 UGT1A1 SERPINF2 MBL2 TNFRSF11A IL1A HAMP SAA1
TUMOR_NECROSIS_FACTOR_SUPERFAMILY_CYTOKINE_PRODUCTION	0.00155521	0.0135741	0.559991	2.20129	0	128	55	CYBB AXL PTPRJ GAS6 GPNMB IGF1 FCER1G APP RIPK1 TYROBP PTAFR DHX9 TLR4 ADIPOQ SIRPA ACP5 THBS1 PTPN22 LGALS9 SASH3 PYCARD CD34 IRAK3 TLR9 IFIH1 TNFAIP3 CD14 PTPRC CX3CL1 DDX58 LRRK2 TLR3 LBP PTPN6 SPN ADAM8 ORM1 PF4 CD274 JAK2 CD47 TSPO CD86 CYBA CD36 CD2 BCL3 CIDEA ERRFI1 TLR1 RASGRP1 HAVCR2 PTPN11 CCR2 LTF
REGULATION_OF_CELL_SUBSTRATE_ADHESION	0.00155039	0.0135741	0.559901	2.32508	0	194	97	MMRN1 SFRP1 ACTN4 FBLN1 PTPRJ GPM6B DDR2 MAP4K4 HSD17B12 ITGA6 POSTN IQGAP1 ABI3BP MMP14 GCNT2 VIT APOD ACER2 DOCK5 TACSTD2 ADAM15 PREX1 THBS1 BST1 RSU1 EMP2 APOA1 GBP1 ALOX15 ANGPT2 RAC2 CORO1C CX3CL1 DLC1 NID1 ECM2 UTRN EMILIN2 PDPN FGB PLG FGA CSF1 MYADM CASK SEMA3E FAM107A PTK2B THY1 EDIL3 FN1 MEN1 FGG CALR DOCK1 JAK2 PPM1F CAMSAP3 ACVRL1 FERMT1 FZD4 EGFL6 FLNA BCL2 PTN VWC2 CD36 RHOA EFNA5 R…
CELLULAR_RESPONSE_TO_CAMP	0.00165289	0.0135741	0.559883	1.89442	0	50	20	NOX4 APP PTAFR PIK3CG RAP1B EZR PKD2 PENK ADIPOQ PCK1 WT1 AHR HCN4 KCNQ1 STC1 ZFP36L1 IGFBP5 SLC8A3 CPS1 ITPR2
POSITIVE_REGULATION_OF_LEUKOCYTE_CELL_CELL_ADHESION	0.00154799	0.0135741	0.559873	2.32182	0	186	100	TGFBR2 IL1RL2 CD44 ANXA1 IL6ST DPP4 AKT1 NCKAP1L IGF1 CAV1 LYN ITGA4 FYN PTAFR CD74 TGFB1 SIRPA CARD11 TNFRSF13C LGALS9 SASH3 VCAM1 PYCARD SYK CD83 PTPRC CSK PTPN6 PAK2 PNP ADAM8 THY1 VNN1 TNFSF13B CCDC88B TNFRSF14 GLI3 CCL5 VAV1 AP3B1 CD274 DOCK8 RUNX3 IL7R VTCN1 PAK3 IL7 KLRK1 CD47 CD86 IL2RA LILRB4 RHOA ICAM1 CD4 EFNB3 IGFBP2 ADA RASGRP1 GRAP2 LCK HAVCR2 RUNX1 PTPN11 CD6 TNF MALT1 CCR2 CCL2 ZM…
ALPHA_BETA_T_CELL_ACTIVATION	0.0015528	0.0135741	0.559134	2.1866	0	122	73	TGFBR2 ANXA1 NCKAP1L SEMA4A IRF4 TWSG1 PLA2G2D RSAD2 CD300A LGALS9 SASH3 ATP7A SYK CD83 PTPRC DOCK2 LY9 SPN PNP TNFRSF14 GLI3 AP3B1 CD274 ELF4 MAPK8IP1 RUNX3 STAT3 CD86 BCL11B BCL2 RHOA BCL3 GPR183 SH3RF1 LOXL3 BRAF ADA RUNX1 SLAMF6 IL18R1 ITCH RORA MALT1 EOMES IRF1 CCR2 CD3E SOCS1 STAT6 TCF7 IHH IL18 NFKBID PRKCZ BLM GATA3 PRDM1 ARG2 FOXP1 IL12RB1 RASAL3 EBI3 CCL19 MYB TBX21 BATF PTGER4 ZFPM1 GP…
DIGESTIVE_SYSTEM_DEVELOPMENT	0.0015674	0.0135741	0.559062	2.20155	0	131	55	SFRP1 CLMP TGFBR2 KIT PDGFRA ITGA6 SFRP2 PDGFC SFRP5 RARRES2 C1GALT1 OXTR SMO TGFB1 PCSK5 EGFR DACT1 STRA6 RB1 SHOX2 FGFR2 RBPMS2 NIPBL ID2 GLI3 ALDH1A2 AHI1 KLF5 EDNRB TYMS ITGB4 GATA6 BCL2 FGF10 CDKN1C HIF1A ADA SMAD3 SALL1 CPS1 TNF CCNB1 VANGL2 HRH2 RET TCF21 CCDC40 DAB1 TCF7 WDR19 DCHS1 MYOCD IHH IGF2 YIPF6
POSITIVE_REGULATION_OF_ALPHA_BETA_T_CELL_ACTIVATION	0.00164204	0.0135741	0.55877	1.92802	0	57	37	TGFBR2 ANXA1 NCKAP1L LGALS9 SASH3 SYK CD83 PTPRC PNP GLI3 AP3B1 RUNX3 CD86 RHOA ADA RUNX1 MALT1 CCR2 CD3E SOCS1 IHH IL18 NFKBID PRKCZ BLM IL12RB1 RASAL3 EBI3 CCL19 MYB ZAP70 AP3D1 ITPKB RIPK2 CD80 NFKBIZ IL23R
NEGATIVE_REGULATION_OF_T_CELL_PROLIFERATION	0.00166945	0.0135741	0.558605	1.89637	0	53	29	GPNMB TWSG1 PLA2G2D PDE5A TGFB1 LGALS9 PTPN6 SPN CASP3 TNFRSF14 CD274 VTCN1 VSIG4 CD86 IL2RA PLA2G2F HAVCR2 ARG1 DLG5 ITCH IHH IDO1 PAWR ARG2 PDCD1LG2 SDC4 IL20RB TNFRSF21 MAD1L1
SUPEROXIDE_METABOLIC_PROCESS	0.00162866	0.0135741	0.558014	1.95843	0	63	37	CYBB NOX4 SH3PXD2B NCF1 ITGAM TYROBP GNAI3 ITGB2 TGFB1 PREX1 ACP5 SOD3 BST1 EGFR F2RL1 ATP7A SYK GNAI2 NCF2 FBLN5 DUOX2 EDN1 CYBA CD36 TNF NFE2L2 BMP7 NCF4 CD177 FPR2 SH3PXD2A RGN AGT DUOX1 NOS2 NOS3 PON3
POSITIVE_REGULATION_OF_ADHERENS_JUNCTION_ORGANIZATION	0.00998336	0.0454455	0.557929	1.70135	5	30	18	SFRP1 PTPRJ MAP4K4 IQGAP1 ADD1 THY1 PPM1F ROCK1 SMAD3 MYOC TEK FMN1 S100A10 ARF6 HRG SDC4 LIMS1 KDR
POSITIVE_REGULATION_OF_LYMPHOCYTE_DIFFERENTIATION	0.00159236	0.0135741	0.556933	2.05482	0	85	52	AXL TGFBR2 GAS6 IL1RL2 ANXA1 NCKAP1L MMP14 CD74 TGFB1 INPP5D LGALS9 SASH3 SYK CD83 PTPRC PNP ADAM8 BTK VNN1 ATP11C GLI3 AP3B1 RUNX3 IL7R IL7 CD86 IL2RA LILRB4 RHOA ADA RASGRP1 RUNX1 MALT1 ZMIZ1 SOCS1 IHH IL18 NFKBID PRKCZ GATA3 EGR3 CD27 TOX IL12RB1 CCL19 MYB GLI2 ZAP70 AP3D1 ITPKB RIPK2 XBP1
EXTRACELLULAR_STRUCTURE_ORGANIZATION	0.00144092	0.0135741	0.55555	2.46056	0	388	212	APOC1 DCN TGFBI APOE SULF2 COL14A1 TIMP2 FBLN1 LOX GAS6 ALB FLRT2 GPM6B DDR2 LAMB1 PDGFRA SH3PXD2B BGN HSD17B12 CD44 ITGA6 SFRP2 COMP COL12A1 CYP1B1 POSTN DPP4 ANTXR1 ABI3BP ITGAM RECK APP TNFRSF1B TNC TNFRSF1A PECAM1 ITGA4 SOAT1 MMP14 CMA1 SULF1 LAMA4 ITGA8 SMPD3 FMOD VIT ADAM10 CTSS LUM CDH1 ADAMTS2 DGAT1 ITGA1 ADAM12 ABCA1 ITGB2 ADTRP ADAM15 TGFB1 MFAP4 THBS1 MMP19 ANXA2 LCP1 AEBP1 VCAM1 SERPI…
SALIVARY_GLAND_DEVELOPMENT	0.00494234	0.0270265	0.555294	1.76049	2	36	17	NTN4 TWSG1 SEMA3A TGFB1 TGM2 EGFR HGF FGFR2 EDA FGF10 ESRP2 SEMA3C PLXNA1 BTBD7 TNF BMP7 FGF7
POSITIVE_REGULATION_OF_LEUKOCYTE_PROLIFERATION	0.0016	0.0135741	0.555009	2.12775	0	109	57	TGFBR2 ANXA1 IL6ST NCKAP1L IGF1 LYN TLR4 CD74 CARD11 TNFRSF13C LGALS9 BST1 SASH3 VCAM1 PYCARD SYK TLR9 PTPRC CSF1 CD38 PNP TNFSF13B CCDC88B CCL5 CD274 IRS2 VTCN1 IL7 CD86 IL2RA BCL2 FGF10 CD4 GPR183 IGFBP2 CD81 ADA HAVCR2 CD6 CCR2 SLC39A10 CD40 CD3E CORO1A IGF2 IL18 BLM AIF1 IL12RB1 CD276 PDCD1LG2 TRAF6 RASAL3 EBI3 SPTA1 CCL19 EFNB1
POSITIVE_REGULATION_OF_VASCULAR_SMOOTH_MUSCLE_CELL_PROLIFERATION	0.00496689	0.0271002	0.554877	1.74323	2	34	18	IGF1 GNAI3 MAP3K5 HPGD GNAI2 MMP2 EDN1 JAK2 IGFBP5 ERN1 DNMT1 TNF NR4A3 AGT FGF2 P2RY6 LDLRAP1 MMP9
POSITIVE_REGULATION_OF_CELL_ACTIVATION	0.00149701	0.0135741	0.554579	2.37576	0	274	149	AXL TGFBR2 GAS6 IL1RL2 ANXA1 IL6ST DPP4 AKT1 NCKAP1L ITGAM IGF1 FCER1G APP CAV1 TYROBP LYN C1QA MMP14 FYN PTAFR SELP TLR4 GAB2 ITGB2 CD74 TGFB1 SIRPA CARD11 THBS1 TNFRSF13C INPP5D LGALS9 BST1 SASH3 VCAM1 F2RL1 PYCARD SYK CD83 TLR9 CEBPA ADORA2B PTPRC LRRK2 CSK LBP PDPN PTPN6 STXBP1 CD38 PAK2 PNP ADAM8 BTK FGR THY1 VNN1 ATP11C STAP1 TNFSF13B CCDC88B TNFRSF14 GLI3 CCL5 VAV1 AP3B1 CD274 MSH6 IRS2 DO…
REGULATION_OF_LEUKOCYTE_APOPTOTIC_PROCESS	0.00161812	0.0135741	0.554225	1.9971	0	74	40	AXL GAS6 MERTK ANXA1 CCR5 FCER1G LYN CD74 PRELID1 IRF7 LGALS9 LGALS3 HCLS1 P2RX7 SLC7A11 ADAM8 BTK CCL5 CD274 IRS2 DOCK8 IL7R CXCL12 HIF1A ADA RIPK3 SLC39A10 NR4A3 CD3G PDCD1 CXCR2 PTEN NFKBID BLM IDO1 AURKB CD27 ARG2 PIK3CB FOXP1
RESPONSE_TO_ESTROGEN	0.00162866	0.0135741	0.554158	1.9449	0	63	28	SFRP1 TGFBR2 ARSB PPARG ARPC1B CCND1 CTNNA1 ESR1 CAV1 MMP14 KRT19 APOA1 GLI3 GATA6 APOA2 IGFBP2 SERPINB9 HMOX1 BRCA1 TEK CITED4 TNFRSF11B CITED1 GATA3 TRIM25 ARID5A GBA SRD5A1
GRANULOCYTE_DIFFERENTIATION	0.00827815	0.0397611	0.553961	1.71104	4	32	13	C1QC ADIPOQ INPP5D HCLS1 CEBPA L3MBTL3 CEACAM1 FASN TAL1 EVI2B CEBPE RUNX1 SP3
NEGATIVE_REGULATION_OF_CYTOKINE_SECRETION	0.00163666	0.0135741	0.55315	1.88058	0	52	32	GAS6 ANXA1 TLR8 SRGN FCGR2B EZR PTPN22 F2RL1 APOA1 GBP1 CD34 TNFAIP3 CX3CL1 C1QTNF3 FFAR4 CD200R1 IL1R2 FN1 BANK1 APOA2 CIDEA TNF PML HDAC9 ARG2 PTGER4 TLR6 NR1H4 TNFRSF21 ANXA4 ZC3H12A LILRA5
REGULATION_OF_RESPONSE_TO_CYTOKINE_STIMULUS	0.0015361	0.0135741	0.553059	2.22227	0	151	75	AXL IFNGR1 PPARG GAS6 TRIM44 ZBP1 SLIT3 IL1R1 CAV1 RIPK1 TNFRSF1A DHX9 TLR4 CD74 ADIPOQ IRF7 CCDC3 CASP8 PARP14 IFNAR2 RNASEL HPX F2RL1 PYCARD SYK APOA1 CASP1 IRAK3 TICAM2 NLRC5 IFIH1 TNFAIP3 PTPRC AGPAT2 DDX58 SAMHD1 PTPN6 CSF1 IRAK2 ECM1 PARP9 STAT1 ELF1 STAP1 CD300LF CCL5 ROBO1 IL1R2 EDN1 CASP4 PELI3 JAK2 IL7 USP18 HIPK1 SLIT2 CREBRF SOCS3 HIF1A IL1RN RUNX1 MMP12 PTPN11 ARG1 TNF PTPN1 TREM2 SO…
PROTEOGLYCAN_BIOSYNTHETIC_PROCESS	0.00164474	0.0135741	0.552904	1.94849	0	66	31	DCN DSE BGN UGDH IGF1 CHST11 UST EXT1 VCAN CHST14 DSEL HS3ST3B1 HS3ST1 HS2ST1 CHST3 CHPF BMPR2 CHST15 CHST12 CHSY1 VANGL2 GLCE NDST1 HS3ST3A1 BMPR1B CSGALNACT1 XYLT2 NDST2 XYLT1 CYTL1 CSPG5
TRANSFORMING_GROWTH_FACTOR_BETA_PRODUCTION	0.00326264	0.0202312	0.552655	1.75044	1	35	17	TYROBP LUM THBS1 LGALS9 CD34 CX3CL1 CREB1 CD2AP GATA6 ITGB8 CDH3 HIF1A LTBP1 SMAD3 SERPINB7 ATF2 SERPINF2
MYELOID_LEUKOCYTE_MIGRATION	0.00151286	0.0135741	0.552537	2.24135	0	162	81	CXCL9 KIT PLCB1 ANXA1 RARRES2 NCKAP1L CCR1 FCER1G IL1R1 CXADR CCL8 CAMK1D PECAM1 NBL1 LYN MMP14 THBS4 P2RX4 PIK3CG IL17RC C3AR1 SWAP70 ITGA1 ITGB2 CD74 LGMN SIRPA PREX1 CD300A THBS1 BST1 LGALS3 SYK ITGA9 RAC2 CX3CL1 LBP IL17RA CSF1 ADAM8 SLAMF8 PF4 MAPK3 TRPV4 PTK2B STAP1 MOSPD2 CCL5 CD200R1 VAV1 P2RY12 ANO6 EDN1 IRAK4 EDNRB S100A14 CXCL12 CD47 SLIT2 C5AR1 IL1RN PDGFD ROR2 PIP5K1C CCR2 CCL2 TREM2…
REGULATION_OF_ACUTE_INFLAMMATORY_RESPONSE	0.00332226	0.0202312	0.552108	1.775	1	39	15	PPARG C3 IL6ST FCER1G OSMR PIK3CG FCGR2B DNASE1L3 PTGER3 ADAM8 BTK EDNRB TNF CNR1 FFAR2
NEGATIVE_REGULATION_OF_CELL_ADHESION	0.00151286	0.0135741	0.551581	2.33295	0	241	127	TGFBI ACTN4 FBLN1 MAP4K4 EPCAM ANXA1 CYP1B1 POSTN AKT1 GPNMB MBP ARHGDIA TNC MMP14 PDE3B CD9 TWSG1 GCNT2 PLA2G2D APOD ACER2 ADAM10 FCGR2B CDH1 SWAP70 PDE5A CD74 TACSTD2 ADTRP ADAM15 TGFB1 ADIPOQ PLXNA4 CD300A THBS1 PTPN22 DTX1 LGALS9 SEMA5A PLXNB2 ARHGDIB LGALS3 CDSN APOA1 GBP1 ANGPT2 CORO1C PTPRC PAG1 CX3CL1 DLC1 ABAT C1QTNF1 TNFAIP8L2 PLG PTPN6 MYADM PLXNC1 SPN FXYD5 CASP3 CEACAM1 CASK SEMA3E T…
REGULATION_OF_PHOSPHATIDYLINOSITOL_3_KINASE_SIGNALING	0.0016	0.0135741	0.551414	2.10964	0	108	55	DCN KIT PDGFRA PDGFC NCF1 NEDD4 IGF1 PIK3AP1 NTRK2 LYN F2R FYN PTPN13 PIK3CG PIP4K2A SELP ENTPD5 EGFR F2RL1 PIK3R5 HCLS1 PRR5L CBL HGF RELN PTPN6 CEACAM1 FGR MAPK3 PLXNB1 CAT CCL5 IRS2 PRR5 JAK2 ERBB3 FLT3 FLT4 RASGRP1 PDGFD MYOC TNF F2 PIP5K1C TEK SLC9A3R1 ERBB4 SRC PTEN IL18 AGT SERPINA12 PIK3CB KLF4 TWIST1
NEGATIVE_REGULATION_OF_ENDOTHELIAL_CELL_PROLIFERATION	0.00827815	0.0397611	0.551411	1.70317	4	32	13	APOE PPARG CAV1 SULF1 TNMD THBS1 PTPRM NGFR STAT1 CAV2 ACVRL1 TNF CCL2
REGULATION_OF_ADHERENS_JUNCTION_ORGANIZATION	0.00164204	0.0135741	0.551097	1.93655	0	64	38	SFRP1 PTPRJ GPM6B MAP4K4 IQGAP1 MMP14 APOD THBS1 CORO1C ADD1 DLC1 FAM107A THY1 PPM1F CAMSAP3 ACVRL1 RHOA EFNA5 ROCK1 EPHA3 RCC2 SMAD3 MYOC TEK FMN1 S100A10 SRC PTEN ARF6 GREM1 HRG SLC9A1 ARHGAP6 SDC4 PHLDB2 LRP1 LIMS1 KDR
LONG_CHAIN_FATTY_ACID_METABOLIC_PROCESS	0.00163399	0.0135741	0.550437	1.93948	0	65	27	FADS1 PTGIS ACSL5 CYP1B1 ELOVL5 MGLL FADS2 CPT1A PLA2G4A PAM SLC27A2 TBXAS1 ACSL1 ALOX15 ACSBG1 HPGDS FAAH MAPK3 ACOT4 ACOT1 CYP2S1 PTGS1 ELOVL1 PTGES CYP2E1 SLC27A6 AWAT1
MACROPHAGE_CHEMOTAXIS	0.00827815	0.0397611	0.550432	1.70015	4	32	17	RARRES2 C3AR1 THBS1 LGALS3 CX3CL1 CSF1 SLAMF8 MAPK3 TRPV4 PTK2B STAP1 CCL5 EDNRB C5AR1 CCL2 MMP28 CMKLR1
POSITIVE_REGULATION_OF_MUSCLE_CONTRACTION	0.00332226	0.0202312	0.550313	1.76923	1	39	17	KIT RGS2 F2R PTAFR OXTR ABAT KCNQ1 ITGA2 ATP1A1 EDN1 RHOA ADA CTTN ENO1 NPNT SPHK1 MYOCD
POSITIVE_REGULATION_OF_LEUKOCYTE_MEDIATED_IMMUNITY	0.0015748	0.0135741	0.550223	2.07095	0	96	40	C3 B2M ITGAM FCER1G IL1R1 PTAFR RSAD2 GAB2 ITGB2 TGFB1 SASH3 HPX F2RL1 SYK P2RX7 ADORA2B PTPRC DDX58 STXBP1 BTK FGR VAV1 MSH6 KLRK1 LAG3 RASGRP1 ARG1 AP1G1 SLAMF6 TNF IL18R1 MALT1 DDX21 CD40 STAT6 CD226 CD177 IL18 PRKCZ GATA3
OVULATION_CYCLE_PROCESS	0.00165289	0.0135741	0.550107	1.79329	0	41	16	PDGFRA SGPL1 NRIP1 SLIT3 ESR1 PAM MMP19 RETN PGR CASP3 ARRB1 FZD4 SLIT2 FOXO3 SRC BMPR1B
GLAND_MORPHOGENESIS	0.00156495	0.0135741	0.54998	2.12091	0	111	56	NTN4 SFRP1 SULF2 TGFBR2 MSN ESR1 CAV1 TNC CSF1R TWSG1 SULF1 SEMA3A NTN1 TGFB1 TGM2 EGFR SERPINB5 VDR TNFAIP3 HGF FGFR2 PGR CSF1 CEACAM1 DUOX2 EDA GLI3 RPS6KA1 LRP6 BCL2 PTN FGF10 ESRP2 CFLAR IGFBP5 PTCH1 SEMA3C PLXNA1 GDF7 BTBD7 ARG1 SOSTDC1 TNF AREG BMP7 ELF3 MSX2 PML STAT6 FGF7 SLC9A3R1 SRC CRIP1 FRS2 ID4 KDM5B
VASCULAR_ENDOTHELIAL_GROWTH_FACTOR_RECEPTOR_SIGNALING_PATHWAY	0.00160256	0.0135741	0.549484	2.03984	0	89	39	CYBB AXL MYOF FAM129B NCF1 NCKAP1 NCKAP1L NEDD4 VAV2 SULF1 FYN TNMD PRKCB CYFIP1 NCF2 PAK2 PTK2B VAV1 DOCK1 MAPK11 FZD4 NRP2 WASF2 CYBA ELMO2 ABI1 RHOA FGF10 ELMO1 SHB HIF1A ROCK1 FLT4 CADM4 GRB10 ITGB3 SH2D2A PTPN1 BAIAP2
REGULATION_OF_SYSTEMIC_ARTERIAL_BLOOD_PRESSURE	0.00161812	0.0135741	0.549475	1.97999	0	74	32	MME GAS6 POSTN ENPEP ACE F2R CMA1 OXTR KCNK6 PRCP PCSK5 EMP2 F2RL1 ADM AVPR1A CPA3 PLCB3 SLC2A5 EDN1 ARHGAP42 CYBA BMPR2 RHOA ECE1 CTSZ GJA5 EDN3 NCALD SERPINF2 AGT ADRB3 HSD11B2
REGULATION_OF_AXON_GUIDANCE	0.00163666	0.0135741	0.549179	1.7978	0	42	16	SEMA3D SEMA4A SEMA3F SEMA3A PLXNA4 SEMA5A SEMA3E SEMA3G SEMA4B CXCL12 ZSWIM6 TUBB2B SLIT2 BMPR2 SEMA3C ZSWIM4
NEURAL_CREST_CELL_MIGRATION	0.00166113	0.0135741	0.548934	1.8701	0	54	27	SEMA3D SEMA4A SEMA3F SEMA3A CFL1 ZEB2 SMO SEMA5A CORO1C SEMA3E SEMA3G FN1 EDNRB SEMA4B NRP2 HAND2 HIF1A SEMA3C BMP7 RET EDN3 ERBB4 GDNF SEMA6B TWIST1 SEMA7A EFNB1
PHENOL_CONTAINING_COMPOUND_METABOLIC_PROCESS	0.00166389	0.0135741	0.548425	1.82208	0	46	26	ITGAM DIO2 ITGB2 ATP7A ABAT DUOX2 BCL2 CPQ DUOXA1 SNCAIP MTPN DIO3 NR4A2 DUOXA2 GATA3 DUOX1 SRD5A1 NPR1 SULT1A1 PAX8 GCNT4 PDE1B SNCA TG DIO1 RNF180
HEAD_MORPHOGENESIS	0.00674536	0.0338605	0.548394	1.73484	3	37	20	PDGFRA SGPL1 ARID5B TGFB1 STRA6 CRISPLD1 MMP2 NIPBL RRAS LRP6 BRAF PTPN11 DLX5 IHH SKI SSBP3 MYH3 CSRNP1 CRISPLD2 MSX1
NEGATIVE_REGULATION_OF_TOLL_LIKE_RECEPTOR_SIGNALING_PATHWAY	0.00827815	0.0397611	0.548358	1.72275	4	34	15	IRF4 LYN TLR4 CD300A F2RL1 IRAK3 TICAM2 TLR9 TNFAIP3 CD14 TLR3 MFHAS1 CD300LF GRAMD4 TYRO3
NEGATIVE_REGULATION_OF_COAGULATION	0.00166945	0.0135741	0.547717	1.8594	0	53	31	APOE PROS1 SERPING1 PDGFRA PLAT CD9 ANXA5 ADTRP THBS1 ANXA2 CD34 TFPI ABAT C1QTNF1 FGB PLG FGA CEACAM1 KRT1 KNG1 FGG EDN1 UBASH3B F2 THBD PLAUR SERPINF2 SERPINB2 HRG NOS3 TMPRSS6
REGULATION_OF_CD4_POSITIVE_ALPHA_BETA_T_CELL_ACTIVATION	0.00166945	0.0135741	0.547572	1.85891	0	53	30	TGFBR2 ANXA1 NCKAP1L IRF4 TWSG1 LGALS9 SASH3 CD83 CD274 RUNX3 CD86 SH3RF1 LOXL3 RUNX1 MALT1 SOCS1 IL18 NFKBID PRKCZ GATA3 ARG2 IL12RB1 CCL19 MYB TBX21 RIPK2 ZC3H12A CD80 NFKBIZ IL23R
REGULATION_OF_ANTIGEN_RECEPTOR_MEDIATED_SIGNALING_PATHWAY	0.00164204	0.0135741	0.547445	1.87956	0	56	34	PTPRJ LYN FCGR2B PRKCB EZR CMTM3 CD300A PTPN22 NFAM1 LGALS3 GBP1 PTPRC PTPN6 CEACAM1 THY1 ELF1 STAP1 LILRB4 BLK PAX5 ADA LCK RUNX1 MALT1 SLC39A10 CD226 KCNN4 RELA PRKCH PAWR CD22 FOXP1 UBASH3A CD19
MEMBRANE_PROTEIN_PROTEOLYSIS	0.00164204	0.0135741	0.546952	1.87787	0	56	33	APOE TIMP2 CTSH TNFRSF1B SH3D19 ADAM10 NAPSA TIMP3 TGFB1 P2RX7 PSEN1 ADAM8 NGFR ERAP1 BACE2 NFKB1 MBTPS1 ROCK1 TNF RET NCSTN APH1B MYH9 RELA SNX9 RHBDD1 TRAF6 TMPRSS6 ADAM17 TIMP1 ADAM19 PSEN2 ADRA2A
PROSTATE_GLAND_DEVELOPMENT	0.00163666	0.0135741	0.546812	1.79004	0	42	20	SFRP1 ANXA1 ESR1 TNC SULF1 SERPINF1 PSAPL1 SERPINB5 FGFR2 GLI3 FGF10 PTCH1 BMP7 PTEN CRIP1 FRS2 ID4 SMARCC1 CYP7B1 GLI2
REGULATION_OF_CYTOKINE_PRODUCTION_INVOLVED_IN_IMMUNE_RESPONSE	0.00160772	0.0135741	0.546129	1.97066	0	73	40	B2M FCER1G IL1R1 TNFRSF1B TLR4 RSAD2 CD74 TGFB1 SASH3 F2RL1 APOA1 IRAK3 BST2 DDX58 TLR3 GPRC5B BTK MAPK3 TNFRSF14 HK1 APOA2 CD36 HMOX1 ARG1 TNF IL18R1 MALT1 CCR2 DDX21 NR4A3 CD226 CD96 IL18 FFAR2 PRKCZ GATA3 TRAF6 TRIL SEMA7A TBX21
PLATELET_ACTIVATION	0.0015674	0.0135741	0.545792	2.17236	0	146	73	CSRP1 AXL APOE GAS6 PDGFRA MERTK COMP CLIC1 GNG2 FCER1G GNB1 LYN VAV2 CD9 F2R FYN PIK3CG PRKCB SELP TLR4 FERMT3 PLCG2 GNA13 GNA12 SYK PIK3R5 RAP2B LCP2 F8 ABAT C1QTNF1 SLC7A11 PDPN FGB FGA PTPN6 STXBP1 CEACAM1 PF4 MAPK3 ACTG1 ARRB1 VAV1 P2RY12 FGG PLEK DGKD FLNA FZD6 UBASH3B LCK ITGB3 PTPN11 TYRO3 F2 CD40 TSPAN32 THBD ITPR2 PLSCR1 MYH9 VWF SRC ADRA2C ITPR1 PRKCH HRG DGKB PIK3CB NOS3 ENTPD2 F2RL2 …
REGULATION_OF_ACTIN_CYTOSKELETON_REORGANIZATION	0.0083612	0.0400031	0.545791	1.69428	4	33	18	PDGFRA ARHGDIA CSF1R TGFB1 HCK ARHGDIB HCLS1 SEMA3E PTK2B STAP1 CD2AP GMFG TRPM2 BAIAP2 TEK F11R BAIAP2L1 FES
T_CELL_PROLIFERATION	0.00154321	0.0135741	0.545582	2.19284	0	152	79	TGFBR2 MSN ANXA1 IL6ST GPNMB NCKAP1L IGF1 TNFRSF1B TWSG1 FYN PIK3CG PLA2G2D CCND3 PDE5A TGFB1 CARD11 TNFRSF13C LGALS9 SASH3 VCAM1 LGALS3 SLC11A1 PYCARD SYK P2RX7 RAC2 PTPRC DOCK2 PTPN6 SPN PNP CASP3 TNFSF13B CCDC88B TNFRSF14 CCL5 CD274 ELF4 DOCK8 MAPK8IP1 VTCN1 VSIG4 CD86 IL2RA CD4 SH3RF1 IGFBP2 PLA2G2F HAVCR2 ARG1 DLG5 CD6 RIPK3 ITCH MALT1 IRF1 CCR2 CD3E CORO1A NCSTN IHH IGF2 IL18 BLM IDO1 PAWR …
INTERLEUKIN_8_PRODUCTION	0.00163399	0.0135741	0.545343	1.92153	0	65	33	ANXA1 TLR8 TLR7 RIPK1 F2R TLR4 TLR5 ADIPOQ PTPN22 LGALS9 F2RL1 PYCARD CHI3L1 TLR9 CD14 PTPRC DDX58 TLR3 LBP ARRB1 AFAP1L2 APOA2 CD2 BCL3 TLR1 TNF FFAR2 TLR2 MYD88 KLF4 NOS2 HSPA1B TLR6
REGULATION_OF_CELL_KILLING	0.00162866	0.0135741	0.545128	1.9132	0	63	25	B2M ITGAM TYROBP FCGR2B DNASE1L3 LGALS9 F2RL1 P2RX7 PTPRC CEACAM1 STAP1 VAV1 IL7R KLRK1 LAG3 PRF1 ICAM1 SERPINB9 RASGRP1 HAVCR2 ARG1 AP1G1 SLAMF6 RIPK3 BCL2L11
RENAL_SYSTEM_PROCESS	0.00159236	0.0135741	0.5451	2.02791	0	92	47	SULF2 GAS6 ADCY3 F2R SULF1 PRKAR2B MYO5B ADIPOQ LGMN PCSK5 GSN EMP2 F2RL1 MYO1E CD34 GNAI2 ADM AVPR1A CLDN4 ADCY7 BTC KCNQ1 STC1 EDN1 EDNRB BCR RAB11FIP2 CYBA BCL2 RHOA ADCY5 ADCY1 AQP3 XPNPEP3 GJA5 ITGA3 SLC9A3R1 PRKAR1B SERPINF2 AGT HSD11B2 NPR1 ATP6V1B1 PTPRO ADORA2A TFAP2B ADRA1A
REGULATION_OF_ALPHA_BETA_T_CELL_ACTIVATION	0.00161812	0.0135741	0.545034	1.99356	0	83	48	TGFBR2 ANXA1 NCKAP1L IRF4 TWSG1 CD300A LGALS9 SASH3 SYK CD83 PTPRC PNP TNFRSF14 GLI3 AP3B1 CD274 MAPK8IP1 RUNX3 CD86 RHOA SH3RF1 LOXL3 ADA RUNX1 ITCH MALT1 IRF1 CCR2 CD3E SOCS1 IHH IL18 NFKBID PRKCZ BLM GATA3 PRDM1 ARG2 IL12RB1 RASAL3 EBI3 CCL19 MYB TBX21 ADORA2A ZAP70 AP3D1 ITPKB
POSITIVE_REGULATION_OF_INFLAMMATORY_RESPONSE	0.00155521	0.0135741	0.545003	2.12161	0	120	61	C3 IL6ST ITGAM TLR7 FCER1G APP TNFRSF1A GRN C1QA OSMR PIK3CG DHX9 IL17RC TLR4 ITGB2 PTGER3 TGM2 EGFR TLR9 CEBPA ADORA2B CX3CL1 LRRK2 TLR3 LBP IL17RA PDCD4 GPRC5B ADAM8 BTK IL17RB TRPV4 STAP1 ITGA2 JAK2 CD47 MAPK13 IL33 GBP5 MGST2 CD6 TNF IL1RL1 CCR2 TREM2 FABP4 LDLR CDK19 CNR1 IL18 TTBK1 FFAR2 AGT IDO1 TLR2 MYD88 LPL MMP8 GPSM3 PTGER4 TLR6
REGULATION_OF_CHOLESTEROL_BIOSYNTHETIC_PROCESS	0.00165289	0.0135741	0.544463	1.77489	0	41	17	APOE POR ACACA SP1 SQLE SREBF2 HMGCR ELOVL6 APOB FASN ERLIN2 ABCG1 KPNB1 MBTPS1 NFYA SCAP ERLIN1
NEGATIVE_REGULATION_OF_CELL_ACTIVATION	0.00152439	0.0135741	0.543907	2.21962	0	168	89	SFRP1 AXL APOE PDGFRA MERTK ANXA1 GPNMB GRN TYROBP LYN CD9 TWSG1 PLA2G2D FCGR2B ENPP3 MNDA PDE5A CD74 TGFB1 CD300A PTPN22 INPP5D DTX1 LGALS9 LGALS3 TNFAIP3 PTPRC PAG1 CX3CL1 ATM ABAT C1QTNF1 TNFAIP8L2 SAMSN1 GCLC PTPN6 CD84 SPN CASP3 CEACAM1 BTK CD300LF ID2 TNFRSF14 GLI3 CD274 FGG BCR BANK1 RUNX3 VTCN1 LAG3 VSIG4 CD86 IL13RA2 IL2RA LOXL3 PLA2G2F UBASH3B LST1 HMOX1 HAVCR2 RUNX1 ARG1 DLG5 ITCH TYRO…
POSITIVE_REGULATION_OF_REACTIVE_OXYGEN_SPECIES_METABOLIC_PROCESS	0.00163666	0.0135741	0.543676	1.77978	0	42	23	TGFBR2 NOX4 ITGAM RIPK1 TYROBP GNAI3 ITGB2 PID1 TGFB1 THBS1 EGFR F2RL1 GNAI2 TSPO CYBA RIPK3 TNF NFE2L2 F2 CD177 FPR2 RGN AGT
UNSATURATED_FATTY_ACID_METABOLIC_PROCESS	0.00166113	0.0135741	0.543533	1.8517	0	54	23	FADS1 PTGIS CYP1B1 ELOVL5 MGLL FADS2 TNFRSF1A PLA2G4A TBXAS1 ACSL1 HPGD ALOX15 HPGDS FAAH MAPK3 CYP2S1 PTGS1 ELOVL1 PTGES CYP2E1 AWAT1 EPHX2 ELOVL2
PLATELET_DEGRANULATION	0.00155521	0.0135741	0.543273	2.11488	0	120	57	MMRN1 ACTN4 GAS6 PROS1 ALB SERPING1 CD109 ACTN1 ENDOD1 RARRES2 IGF1 FCER1G APP LGALS3BP PECAM1 LYN PCDH7 SRGN CD9 F13A1 AHSG TAGLN2 ANXA5 APLP2 SELP FERMT3 TIMP3 CLEC3B TGFB1 THBS1 TOR4A LHFPL2 SYK SCG3 APOA1 LAMP2 STXBP2 HGF F8 CFD FGB PLG FGA STXBP1 ECM1 ORM1 PF4 KNG1 FN1 FGG PLEK FLNA CD36 ITIH3 ITIH4 ITGB3 ISLR
POSITIVE_REGULATION_OF_CELL_CELL_ADHESION	0.0015456	0.0135741	0.543058	2.27079	0	218	113	TGFBR2 IL1RL2 CD44 ITGA6 ANXA1 IL6ST DPP4 AKT1 NCKAP1L IGF1 CAV1 LYN ITGA4 GCNT2 FYN PTAFR CD74 TGFB1 SIRPA CARD11 TNFRSF13C LGALS9 SASH3 VCAM1 PYCARD SYK CD83 ALOX15 PTPRC CX3CL1 CSK PDPN FGB FGA PTPN6 PAK2 PNP ADAM8 THY1 VNN1 TNFSF13B CCDC88B TNFRSF14 GLI3 CCL5 VAV1 AP3B1 CD274 FGG DOCK8 RUNX3 IL7R VTCN1 PAK3 IL7 KLRK1 CD47 CD86 IL2RA LILRB4 RHOA ICAM1 CD4 EFNB3 IGFBP2 ADA RASGRP1 GRAP2 LCK HAV…
ADHERENS_JUNCTION_ORGANIZATION	0.00155521	0.0135741	0.543046	2.13468	0	128	69	SFRP1 DSP PTPRJ CDH11 GPM6B MAP4K4 ACTN1 CTNNA1 RAB8B IQGAP1 MMP14 CADM3 CDH19 APOD CDH1 THBS1 CORO1C ADD1 DLC1 CSK FAM107A PTK2B THY1 ITGA2 SORBS1 TRIP6 PPM1F CAMSAP3 ACVRL1 HIPK1 BCL2 PTPRK RHOA CDH3 EFNA5 ROCK1 EPHA3 CTNND1 RCC2 SMAD3 MYOC DLG5 RASSF8 CTTN PIP5K1C TEK KIFC3 FMN1 S100A10 PLEKHA7 CADM2 SRC CDHR3 PTEN ARF6 GREM1 HRG SLC9A1 ARHGAP6 CDH2 SDC4 CDH9 PHLDB2 CDH22 LRP1 PKP2 ANG LIMS1 K…
REGULATION_OF_B_CELL_ACTIVATION	0.0016	0.0135741	0.542949	2.08151	0	109	47	SFRP1 NCKAP1L TYROBP LYN MMP14 FCGR2B TLR4 MNDA CD74 TGFB1 CARD11 CD300A TNFRSF13C NFAM1 INPP5D BST1 SASH3 SYK TLR9 ZFP36L2 IKZF3 TNFAIP3 PTPRC AHR ATM SAMSN1 PTPN6 CD38 CASP3 BTK SLAMF8 ATP11C TNFSF13B ID2 ZFP36L1 MSH6 IRS2 BANK1 IL7 BCL2 GPR183 CD81 ADA SLC39A10 CD40 IL27RA STAT6
B_CELL_DIFFERENTIATION	0.0015873	0.0135741	0.542768	2.07871	0	106	42	SFRP1 PTPRJ KIT DOCK11 NCKAP1L ITGA4 MMP14 FCGR2B PLCG2 CARD11 DOCK10 NFAM1 INPP5D VCAM1 SYK MFNG TLR9 ZFP36L2 IKZF3 PTPRC ATM PTPN6 KLF6 BTK SLAMF8 RBPJ PTK2B ATP11C ID2 ZFP36L1 NOTCH2 BCL2 BCL3 FLT3 GPR183 LFNG CD79B ADA CD79A HDAC4 MALT1 SP3
REGULATION_OF_NEURON_MIGRATION	0.00993377	0.0454455	0.542678	1.7049	5	34	12	FLRT2 IGSF10 SEMA3A PLXNB2 CX3CL1 RELN NIPBL SRGAP2 STAT3 FLNA KIF20B ERBB4
LUNG_ALVEOLUS_DEVELOPMENT	0.00166667	0.0135741	0.542241	1.75268	0	40	22	MAN2A1 TNS3 MAN1A2 SMPD3 ATP7A STRA6 FGFR2 PGR SLC7A11 ATXN1L CREB1 GATA6 BMPR2 FGF10 FOXP2 IGFBP5 ABCA12 ERRFI1 FLT4 ADA TCF21 MYOCD
SENSORY_PERCEPTION_OF_PAIN	0.00162866	0.0135741	0.542201	1.97587	0	81	35	MME MGLL ACPP F2R FYN PTAFR P2RX4 PENK FABP5 P2RX7 NIPSNAP1 MAPK3 ITGA2 SCN3B EDN1 EDNRB ANO1 CXCL12 KCNA2 NPY1R KCNA1 CNR2 CCR2 CCL2 CNR1 HOXB8 ADRA2C TMEM100 SLC9A1 CACNB3 ARRB2 CHRNA4 CCK MRGPRX2 CCL3
PHOSPHOLIPASE_C_ACTIVATING_G_PROTEIN_COUPLED_RECEPTOR_SIGNALING_PATHWAY	0.00160514	0.0135741	0.541682	1.97916	0	80	41	ESR1 PLCE1 LPAR1 GNB1 F2R C3AR1 PTGER3 TGM2 F2RL1 S1PR1 BICD1 P2RY12 EDN1 EDNRB LPAR3 ANO1 P2RY10 GPR65 C5AR1 GPR174 CASR F2 LPAR6 CMKLR1 FPR2 SLC9A3R1 CXCR2 AGT PTH1R TACR1 CX3CR1 F2RL2 GNA15 P2RY6 GPR27 GPR35 GPR18 GPR55 ADRA1A FPR1 ADRA2A
AMINOGLYCAN_BIOSYNTHETIC_PROCESS	0.0015873	0.0135741	0.541632	2.07436	0	106	59	DCN OGN DSE ST3GAL1 KERA BGN GPC6 UGDH GPC3 OMD CHST11 UST GCNT2 SMPD3 FMOD LUM TGFB1 SDC2 EXT1 VCAN SDC3 CHST14 B3GNT3 B4GALT6 B3GNT2 DSEL SDC1 CHST1 HS3ST3B1 HS3ST1 HS2ST1 CHST3 CHPF B3GNT9 NFKB1 CHST15 CHST12 CHSY1 PRELP ST3GAL4 GLCE B3GNT7 HAS1 NDST1 HS3ST3A1 HYAL1 SLC35D2 CSGALNACT1 XYLT2 NDST2 SDC4 XYLT1 B4GALT4 CLTC GALNT5 CSPG5 B3GNT5 CHST2 B3GNT8
CELL_SUBSTRATE_ADHESION	0.00148148	0.0135741	0.541043	2.3504	0	318	150	MMRN1 LYVE1 SFRP1 AXL ACTN4 FBLN1 PTPRJ GAS6 GPM6B DDR2 LAMB1 MAP4K4 PARVA MERTK HSD17B12 CD44 ITGA6 ACTN1 POSTN IQGAP1 ANTXR1 ITGBL1 ABI3BP PRKX ADAMTS12 PECAM1 ITGA4 MMP14 GCNT2 SIGLEC1 SGCE ITGA8 VIT APOD ACER2 DOCK5 HPSE ZYX FERMT3 ITGA1 ITGB2 TACSTD2 ADAM15 PREX1 THBS1 BST1 RSU1 VCAM1 EMP2 APOA1 GBP1 CD34 ALOX15 ANGPT2 RAC2 CORO1C CX3CL1 MUC4 DLC1 NID1 ECM2 UTRN EMILIN2 PDPN FGB PLG FGA FBLN…
EPHRIN_RECEPTOR_SIGNALING_PATHWAY	0.00162338	0.0135741	0.54071	1.97381	0	82	47	ARPC1B LYN VAV2 FYN SDC2 ARHGEF28 ARPC5 PSEN1 AP2B1 MMP2 EPHB2 ACTG1 RBPJ ACTR3 EFNA4 PAK3 SIPA1L1 RHOA EFNB3 EFNA5 ROCK1 SDCBP EPHA3 PTPN11 NGEF NCSTN APH1B SRC EFNA3 DNM1 EPHA4 EFNB1 ACTR2 MMP9 EPHB6 GIT1 ACTB PSEN2 VAV3 EFNA2 EPHA5 CHN1 TIAM1 CDK5R1 NTRK3 EFNB2 EPHA2
BONE_MINERALIZATION	0.00158228	0.0135741	0.540532	2.06082	0	103	48	LOX GPM6B DDR2 COMP GPC3 OMD GPNMB IGF1 CCR1 SRGN SMPD3 AHSG CLEC3B TGFB1 EIF2AK3 OSR1 P2RX7 SNX10 ALOX15 MGP ENPP1 FGFR2 S1PR1 ECM1 FGR DUOX2 PTK2B SBNO2 ANO6 ZMPSTE24 FBN2 TMEM119 PTN BMPR2 ASPN HIF1A SMAD3 ROR2 BMP7 LTF TUFT1 TXLNG OSR2 FGFR3 BMPR1B TFAP2A PTH1R GREM1
INTERLEUKIN_2_PRODUCTION	0.00162866	0.0135741	0.540439	1.89675	0	63	36	ANXA1 FCER1G IRF4 EZR CARD11 SASH3 SLC11A1 GBP1 CD34 CD83 TNFAIP3 IL1RAP PTPRC PNP VTCN1 SPTBN1 LAG3 VSIG4 CD86 CD4 HAVCR2 RUNX1 MALT1 CCR2 CD3E IL18 GATA3 PAWR TRAF6 TBX21 IL20RB NR1H4 IL1A RIPK2 PRKD2 CD80
MONONUCLEAR_CELL_MIGRATION	0.00163934	0.0135741	0.540396	1.9109	0	68	46	PLCB1 ANXA1 RARRES2 CCR1 CCL8 PECAM1 NBL1 LYN C3AR1 TGFB1 LGMN SIRPA THBS1 LGALS3 CX3CL1 CSF1 SLAMF8 MAPK3 TRPV4 MOSPD2 CCL5 ANO6 S100A14 CXCL12 CD47 SLIT2 C5AR1 PDGFD TNF CCR2 CCL2 CMKLR1 CCL7 FPR2 BMP5 GREM1 AIF1 CCL19 PTPRO TNFRSF11A CCL22 CXCL17 CCL3 CCL4 CXCL10 CCL24
FACE_MORPHOGENESIS	0.00993377	0.0454455	0.540341	1.66898	5	32	17	PDGFRA SGPL1 ARID5B TGFB1 STRA6 CRISPLD1 MMP2 NIPBL RRAS LRP6 PTPN11 DLX5 SKI MYH3 CSRNP1 CRISPLD2 MSX1
RESPONSE_TO_DSRNA	0.0084317	0.0402879	0.540339	1.70936	4	37	17	COLEC12 CAV1 DHX9 P2RX7 IRAK3 IFIH1 TMEM173 DDX58 TLR3 SLC3A2 MAPK3 NFKB1 RFTN2 ZCCHC3 IFIT1 DDX21 PMAIP1
POSITIVE_REGULATION_OF_CELL_MATRIX_ADHESION	0.00162866	0.0135741	0.540318	1.81332	0	47	29	SFRP1 PTPRJ MAP4K4 IQGAP1 EMP2 CX3CL1 UTRN CSF1 PTK2B THY1 PPM1F FERMT1 CD36 ROCK1 SMAD3 MYOC NINJ1 TEK FMN1 S100A10 CD3E PLEKHA2 PRKCZ HRG SDC4 CDK6 LIMS1 KDR CCL28
RECEPTOR_MEDIATED_ENDOCYTOSIS	0.00148368	0.0135741	0.540244	2.31007	0	263	134	APOC1 APOE TGFBR2 C3 MRC1 ALB SCARA3 TINAGL1 B2M COLEC12 ITGAM NEDD4 FCER1G CAV1 LGALS3BP HSP90B1 ITGA4 RAB31 CD9 ENPP2 DAB2 CAP1 CD163 FOLR2 GAK FCGR2B ENPP3 EZR MASP1 ITGB2 PLCG2 APOBR ANXA2 HPX PPT1 SYK APOA1 CD14 ADM CBL MSR1 AP2B1 LOXL2 HP SNX1 ENPP1 ANKRD13A SFRP4 APOB CXCL16 SBSPON CEACAM1 PICALM ARRB1 CALCRL TMPRSS2 BICD1 SCARA5 CANX AHI1 CAV2 CALR STAB2 DNAJC13 CD2AP DNAJC6 CD5L AMBP SCY…
INTERLEUKIN_10_PRODUCTION	0.00163934	0.0135741	0.53959	1.7928	0	45	26	FCER1G IRF4 TYROBP FCGR2B TLR4 LGALS9 SASH3 F2RL1 PYCARD CD34 CD83 TLR9 HGF CD274 CD47 BCL3 PRKCZ IDO1 TLR2 PDCD1LG2 TIGIT MMP8 IL20RB TNFRSF21 EPX LILRA5
CYTOKINE_PRODUCTION_INVOLVED_IN_IMMUNE_RESPONSE	0.00160256	0.0135741	0.539494	2.00275	0	89	45	KIT GAS6 B2M FCER1G IL1R1 TNFRSF1B TLR4 RSAD2 CD74 TGFB1 SASH3 SLC11A1 F2RL1 APOA1 IRAK3 BST2 DDX58 TLR3 GPRC5B BTK MAPK3 TNFRSF14 HK1 APOA2 CD36 HMOX1 ARG1 TNF IL18R1 MALT1 CCR2 DDX21 NR4A3 CD226 CD96 IL18 FFAR2 PRKCZ GATA3 TLR2 MR1 TRAF6 TRIL SEMA7A TBX21
POSITIVE_REGULATION_OF_PROTEIN_TYROSINE_KINASE_ACTIVITY	0.00165289	0.0135741	0.53931	1.82481	0	50	24	NOX4 GAS6 NCF1 NTRK2 ACE CSF1R FYN TGFA RELN PAK2 GPRC5B TAL1 NCAPG2 STAP1 AFAP1L2 CCL5 ERBB3 ABI1 PTPN1 NEDD9 SRC AGT EPHA4 GREM1
REGULATION_OF_CELL_MATRIX_ADHESION	0.00157978	0.0135741	0.539112	2.06663	0	107	56	SFRP1 PTPRJ GPM6B DDR2 MAP4K4 POSTN IQGAP1 MMP14 APOD ACER2 ADAM15 THBS1 BST1 EMP2 CORO1C CX3CL1 DLC1 UTRN CSF1 CASK SEMA3E FAM107A PTK2B THY1 PPM1F CAMSAP3 ACVRL1 FERMT1 BCL2 CD36 RHOA EFNA5 ROCK1 EPHA3 RCC2 MMP12 SMAD3 MYOC NINJ1 TEK FMN1 S100A10 CD3E PLEKHA2 SRC PTEN PRKCZ GREM1 HRG SLC9A1 PIK3CB ARHGAP6 SDC4 PHLDB2 CDK6 LRP1
MAMMARY_GLAND_DUCT_MORPHOGENESIS	0.00993377	0.0454455	0.539012	1.66487	5	32	18	ESR1 CSF1R NTN1 TGFB1 VDR FGFR2 PGR CSF1 LRP6 FGF10 PTCH1 SOSTDC1 AREG MSX2 PML SRC KDM5B GLI2
LEUKOCYTE_CELL_CELL_ADHESION	0.00150376	0.0135741	0.53885	2.31889	0	291	167	TGFBR2 MSN IL1RL2 CD44 ANXA1 IL6ST DPP4 AKT1 GPNMB NCKAP1L GCNT1 IGF1 CAV1 PECAM1 LYN ITGA4 NT5E TWSG1 FYN PTAFR PLA2G2D SELPLG FCGR2B EZR SELP FERMT3 ITGB2 PDE5A CD74 ADTRP TGFB1 SIRPA CARD11 CD300A TNFRSF13C PTPN22 DTX1 LGALS9 SASH3 VCAM1 LGALS3 PYCARD SYK CD83 RAC2 PTPRC PAG1 CSK TNFAIP8L2 STK10 PTPN6 PAK2 SPN PNP ADAM8 CASP3 CEACAM1 THY1 VNN1 TNFSF13B CCDC88B TNFRSF14 GLI3 CCL5 VAV1 AP3B1 CD2…
POSITIVE_REGULATION_OF_LYMPHOCYTE_ACTIVATION	0.0015625	0.0135741	0.538202	2.2524	0	227	116	AXL TGFBR2 GAS6 IL1RL2 ANXA1 IL6ST DPP4 AKT1 NCKAP1L IGF1 CAV1 TYROBP LYN MMP14 FYN TLR4 CD74 TGFB1 SIRPA CARD11 TNFRSF13C INPP5D LGALS9 BST1 SASH3 VCAM1 PYCARD SYK CD83 TLR9 PTPRC CSK PTPN6 CD38 PAK2 PNP ADAM8 BTK THY1 VNN1 ATP11C TNFSF13B CCDC88B TNFRSF14 GLI3 CCL5 VAV1 AP3B1 CD274 MSH6 IRS2 DOCK8 RUNX3 IL7R VTCN1 PAK3 IL7 KLRK1 CD47 CD86 IL2RA LILRB4 BCL2 RHOA FGF10 CD4 GPR183 EFNB3 IGFBP2 CD8…
AMINOGLYCAN_METABOLIC_PROCESS	0.0015528	0.0135741	0.537673	2.10756	0	126	68	DCN OGN DSE ST3GAL1 KERA BGN GPC6 UGDH GPC3 OMD AKT1 ITIH2 CHST11 UST GCNT2 SMPD3 FMOD LUM TGFB1 SDC2 EXT1 ITIH5 VCAN HGF SDC3 CHST14 B3GNT3 B4GALT6 B3GNT2 DSEL SDC1 CHST1 HS3ST3B1 HS3ST1 HS2ST1 CHST3 CHPF B3GNT9 NFKB1 ITIH3 CHST15 ITIH4 CHST12 CHSY1 PRELP ST3GAL4 GLCE B3GNT7 HAS1 NDNF NDST1 HS3ST3A1 HYAL1 SLC35D2 ITIH1 CSGALNACT1 XYLT2 NDST2 SDC4 XYLT1 B4GALT4 CLTC GALNT5 CSPG5 CLN6 B3GNT5 CHST2…
KERATINIZATION	0.00156006	0.0135741	0.537595	2.12164	0	134	60	DSP KRT17 KRT14 ST14 KRT71 PERP PCSK6 KRT19 KRT79 PKP1 CDSN DSG2 SPINK5 KRT10 KRT7 PKP3 KRT80 PKP4 DSC3 KRT77 KRT1 DSC1 KRT15 EVPL KRT5 KRT23 LOR PRSS8 KRT8 SPRR1A CDH3 KAZN ABCA12 TGM1 TCHH KRT25 PPL CNFN KRT75 PPHLN1 KRT6A PKP2 LCE1C SFN KRT2 KRT33A KRTAP11-1 KRT72 DSC2 KRT27 LIPM LCE1B KRT36 DSG3 KRT28 KRT18 KRTAP8-1 KRT73 HRNR KRT81
EMBRYO_IMPLANTATION	0.00163666	0.0135741	0.537371	1.75914	0	42	14	FBLN1 TGFBR2 PTGIS RECK PRLR IGFBP7 PCSK5 ARHGDIB EMP2 MMP2 STC1 ACVR1C CALR SMURF2
POSITIVE_REGULATION_OF_BLOOD_VESSEL_DIAMETER	0.00331126	0.0202312	0.537155	1.81822	1	51	31	APOE RGS2 PTAFR DOCK5 SCPEP1 ITGA1 EGFR F2RL1 PTPRM ADORA2B ADM KCNMB1 KNG1 EDNRB ARHGAP42 APLN BMPR2 BBS2 HMOX1 CPS1 CASR GJA5 EPHX2 AGT ADRB3 NOS3 PLOD3 BDKRB2 GPX1 GCH1 ADORA2A
LIPOPOLYSACCHARIDE_MEDIATED_SIGNALING_PATHWAY	0.00165289	0.0135741	0.537097	1.81733	0	50	27	AKT1 LYN PTAFR TLR4 CD180 LY86 TGFB1 PTPN22 HCK TNFAIP3 CD14 CX3CL1 LBP IRAK2 MAPK3 CCL5 CD36 CD6 TNF SASH1 MALT1 CCL2 LTF IL18 TLR2 NOS3 TRAF6
POSITIVE_REGULATION_OF_B_CELL_ACTIVATION	0.00164474	0.0135741	0.537084	1.89499	0	67	27	NCKAP1L MMP14 TLR4 CD74 TGFB1 CARD11 TNFRSF13C INPP5D BST1 SASH3 SYK TLR9 PTPRC CD38 BTK ATP11C TNFSF13B MSH6 IRS2 IL7 BCL2 GPR183 CD81 ADA SLC39A10 CD40 STAT6
RESPONSE_TO_PH	0.00652529	0.0333484	0.536976	1.70078	3	35	17	ARSB PAM SERPINF1 CTSS LGMN PCK1 CHP1 HVCN1 GPR65 SRC GPR68 HYAL1 TTPA GBA SLC9A1 ACER1 ASIC2
POSITIVE_REGULATION_OF_PEPTIDYL_TYROSINE_PHOSPHORYLATION	0.00151745	0.0135741	0.536915	2.17988	0	163	73	PTPRJ NOX4 KIT GAS6 CD44 IL6ST IQGAP1 NCF1 IGF1 NTRK2 TNFRSF1A ACE PECAM1 LYN CSF1R ENPP2 THBS4 FYN TGFA CD74 TGFB1 ADIPOQ PARP14 HPX SYK HCLS1 PTPRC HGF LRRK1 RELN PAK2 GPRC5B TAL1 PARP9 PTK2B EHD4 NCAPG2 STAP1 AFAP1L2 TNFRSF14 CCL5 BANK1 JAK2 STAT3 ERBB3 ABI1 CD36 FGF10 ICAM1 CD4 FLT3 SOCS3 EFNA5 CD81 ITGB3 TNF AREG PTPN1 TREM2 CD40 CD3E FGF7 NEDD9 CNTN1 FGFR3 ERBB4 GHR SRC IGF2 IL18 AGT EPHA4 …
NEGATIVE_REGULATION_OF_EPITHELIAL_CELL_APOPTOTIC_PROCESS	0.00658979	0.0333622	0.53661	1.70126	3	36	16	GAS6 SEMA5A TNFAIP3 FGB FGA FGG ANGPTL4 ICAM1 CFLAR BRAF HMOX1 NFE2L2 TEK PAK4 NDNF GATA3
REGULATION_OF_CELL_ACTIVATION	0.00141243	0.0135741	0.53604	2.40826	0	468	246	SFRP1 AXL APOE TGFBR2 GAS6 IL1RL2 PDGFRA MERTK ANXA1 IL6ST DPP4 AKT1 GPNMB NCKAP1L ITGAM IGF1 FCER1G APP CAV1 TNFRSF1B IRF4 GRN TYROBP LYN C1QA MMP14 CD9 TWSG1 FYN PTAFR PLA2G2D FCGR2B ENPP3 SELP TLR4 GAB2 MNDA ITGB2 PDE5A CD74 TGFB1 PRELID1 SIRPA CARD11 CD300A THBS1 TNFRSF13C PTPN22 NFAM1 INPP5D DTX1 LGALS9 BST1 GSN SASH3 VCAM1 LGALS3 F2RL1 PYCARD SYK CD83 TLR9 CEBPA ZFP36L2 RAC2 IKZF3 TNFAIP3 A…
INTERLEUKIN_12_PRODUCTION	0.00165289	0.0135741	0.535966	1.8135	0	50	30	PLCB1 TLR8 TLR4 IRF5 ACP5 THBS1 LGALS9 IRAK3 TLR9 TLR3 IRF8 MAPK11 CD47 NFKB1 CD36 IRF1 CD40 CMKLR1 RELA LTB IDO1 TLR2 FOXP1 TRAF6 TIGIT CCL19 ARRB2 RIPK2 SLAMF1 LILRA5
ACUTE_INFLAMMATORY_RESPONSE	0.0016	0.0135741	0.535415	1.99706	0	93	40	PPARG C3 IL6ST FCER1G OSMR PIK3CG CD163 AHSG FCGR2B DNASE1L3 PTGER3 PRCP VCAM1 HP F8 LBP ADAM8 BTK ORM1 VNN1 FN1 ANO6 EDNRB SERPINC1 APOA2 STAT3 PTGES ICAM1 ITIH4 F3 CD6 TNF F2 PLSCR1 CNR1 UGT1A1 CXCR2 FFAR2 SERPINF2 GATA3
SPHINGOLIPID_METABOLIC_PROCESS	0.00164204	0.0135741	0.535229	1.89603	0	69	31	KIT SGPL1 GM2A ASAH1 ASAH2 GLTP SMPD3 CERK PSAPL1 SERINC3 ORMDL3 SERINC5 ESYT1 GLB1 HEXB GALC B3GALNT1 B4GALNT1 SGPP1 ARSA ITGB8 ESYT2 SGPP2 PLA2G15 SPTLC1 UGCG SPHK1 KDSR ESYT3 GBA ACER1
NEGATIVE_REGULATION_OF_ACTIN_FILAMENT_DEPOLYMERIZATION	0.00652529	0.0333484	0.534822	1.69395	3	35	17	LIMA1 TMOD2 EPS8 TMOD3 SWAP70 GSN ADD3 VILL CAPZA1 ADD1 TWF1 SPTBN1 SPTAN1 CAPG PLEKHH2 MTPN SPTBN2
REGULATION_OF_CD4_POSITIVE_ALPHA_BETA_T_CELL_DIFFERENTIATION	0.00327869	0.0202312	0.534536	1.75431	1	43	26	ANXA1 NCKAP1L IRF4 LGALS9 SASH3 CD83 RUNX3 CD86 SH3RF1 LOXL3 RUNX1 MALT1 SOCS1 IL18 NFKBID PRKCZ GATA3 IL12RB1 CCL19 MYB TBX21 RIPK2 ZC3H12A CD80 NFKBIZ IL23R
POSITIVE_REGULATION_OF_ERK1_AND_ERK2_CASCADE	0.00152439	0.0135741	0.5339	2.17945	0	169	95	APOE NOX4 KIT GAS6 PDGFRA CD44 PDGFC GPNMB CCR1 APP CCL8 CSF1R F2R GCNT2 RAP1B TLR4 CD74 TGFB1 PTPN22 LGALS9 EGFR F2RL1 PYCARD ALOX15 GNAI2 CHI3L1 PTPRC CX3CL1 HMGCR FGFR2 FGB FGA MFHAS1 MAPK3 TRPV4 ARRB1 PTK2B FFAR4 GLIPR2 CCL5 FGG NOTCH2 SHC1 HAND2 CD36 C5AR1 FGF10 ICAM1 CD4 FLT3 CFLAR GPR183 FLT4 BRAF RASGRP1 PDGFD HAVCR2 PTPN11 TNF CASR CCL2 TREM2 TEK CCL7 FGFR3 FPR2 NPNT ERBB4 SRC PTEN PRKCZ…
POSITIVE_REGULATION_OF_IMMUNE_EFFECTOR_PROCESS	0.00153374	0.0135741	0.53345	2.17133	0	167	80	PTPRJ C3 B2M ANXA1 ITGAM FCER1G IL1R1 C6 LYN PTAFR ENPP3 TLR4 RSAD2 GAB2 ITGB2 CD74 TGFB1 CD300A LGALS9 SASH3 HPX F2RL1 SYK P2RX7 TLR9 RAC2 ADORA2B PTPRC STXBP2 DDX58 LBP STXBP1 CD84 GPRC5B BTK FGR KLK7 MAPK3 TNFRSF14 VAV1 MSH6 RBP4 HK1 KLRK1 LAG3 CD86 IL13RA2 CD36 IL33 ZCCHC3 RASGRP1 HMOX1 ARG1 AP1G1 SLAMF6 TNF IL18R1 MALT1 CCR2 DDX21 CD40 NR4A3 DDX60 STAT6 CD226 CD177 IL18 NFKBID DHX58 FFAR2 PR…
T_CELL_ACTIVATION	0.00143885	0.0135741	0.533408	2.36501	0	393	205	TGFBR2 KIT MSN IL1RL2 LEPR CD44 B2M ANXA1 IL6ST DPP4 AKT1 GPNMB NCKAP1L NEDD4 IGF1 FCER1G SEMA4A CXADR CAV1 TNFRSF1B IRF4 LYN TWSG1 FYN APBB1IP PIK3CG PLA2G2D PRLR CLEC7A FCGR2B CCND3 RSAD2 PDE5A CD74 SOX4 TGFB1 PRELID1 SIRPA CARD11 PREX1 CD300A TNFRSF13C PTPN22 DTX1 LGALS9 LCP1 GSN CASP8 SASH3 VCAM1 LGALS3 SLC11A1 F2RL1 PYCARD ATP7A SYK CD83 P2RX7 ZFP36L2 RAC2 PSEN1 SPINK5 PTPRC PAG1 DOCK2 CSK T…
PHOSPHATIDYLINOSITOL_3_KINASE_SIGNALING	0.00155763	0.0135741	0.533315	2.10214	0	132	61	DCN KIT PIK3C2A PDGFRA PDGFC AKT1 NCF1 NEDD4 IGF1 PIK3AP1 NTRK2 LYN F2R FYN PTPN13 PIK3CG PIP4K2A SELP ENTPD5 EGFR F2RL1 PIK3R5 HCLS1 PRR5L CBL HGF RELN PTPN6 CEACAM1 FGR MAPK3 PLXNB1 CAT ZFP36L1 CCL5 EDN1 IRS2 PREX2 PRR5 JAK2 ERBB3 FLT3 FLT4 RASGRP1 PDGFD MYOC TNF TYRO3 F2 PIP5K1C TEK SLC9A3R1 ERBB4 SRC PTEN IL18 AGT GATA3 SERPINA12 PIK3CB KLF4
FILOPODIUM_ASSEMBLY	0.00327332	0.0202312	0.533023	1.81215	1	52	37	DOCK11 ITGA6 DPYSL3 EZR GPM6A FGD3 FGD6 S1PR2 SRGAP2 FNBP1L PPP1R9A TRPM2 SPATA13 ZMYND8 FMR1 ARAP1 PPP1R9B FGD4 GAP43 ARF6 FGD2 RAB5A ARHGEF4 DNM3 TTYH1 SH3BP1 NLGN1 TGFBR1 TENM2 PPP1R16B NRP1 VSTM5 ESPN FSCN1 FGD1 CCR7 RAB17
POSITIVE_REGULATION_OF_G1_S_TRANSITION_OF_MITOTIC_CELL_CYCLE	0.00815661	0.0395133	0.532942	1.688	4	35	18	PLCB1 CCND1 ANXA1 AKT1 CCND2 CCND3 EGFR FGF10 CUL4B HYAL1 CDC6 AIF1 ADAM17 MTBP UBE2E2 LSM11 CDC45 CYP1A1
HOMOTYPIC_CELL_CELL_ADHESION	0.00162866	0.0135741	0.53275	1.89654	0	70	34	CSRP1 DSP GAS6 PDGFRA COMP CLIC1 CXADR LYN CD9 PIK3CG FERMT3 DSG2 SYK RAP2B ABAT C1QTNF1 SLC7A11 PDPN FGB FGA PTPN6 STXBP1 CEACAM1 ACTG1 CCL5 P2RY12 FGG PLEK FLNA UBASH3B ITGB3 TYRO3 TSPAN32 MYH9
CELL_MATRIX_ADHESION	0.00153374	0.0135741	0.532046	2.22122	0	209	106	LYVE1 SFRP1 PTPRJ GPM6B DDR2 MAP4K4 CD44 ITGA6 ACTN1 POSTN IQGAP1 ITGBL1 ADAMTS12 PECAM1 ITGA4 MMP14 SIGLEC1 SGCE ITGA8 APOD ACER2 HPSE ZYX ITGA1 ITGB2 ADAM15 THBS1 BST1 VCAM1 EMP2 CD34 CORO1C CX3CL1 MUC4 DLC1 NID1 ECM2 UTRN FGB FGA FBLN5 CSF1 PARVG CASK SEMA3E COL17A1 FAM107A PTK2B THY1 EDA ITGA2 SORBS1 TRPM7 FN1 FGG ITGB4 TRIP6 PPM1F CAMSAP3 MSLN ACVRL1 FERMT1 THBS3 BCL2 PTPRK CD36 RHOA EFNA5 R…
AUTONOMIC_NERVOUS_SYSTEM_DEVELOPMENT	0.00330579	0.0202312	0.531621	1.73303	1	41	19	SEMA3F SEMA3A SOX4 PLXNA4 VCAM1 EDNRA FN1 ADARB1 FZD3 EDNRB NRP2 HAND2 HOXB2 RET EGR2 GDNF GATA3 TFAP2A GFRA3
POSITIVE_REGULATION_OF_ORGANELLE_ASSEMBLY	0.00164204	0.0135741	0.531237	1.86676	0	64	36	MSN ASAP1 DZIP1 PIP4K2A SEPT9 LCP1 GPSM2 CNOT6 SDC1 PDCD6IP CCDC88A EDN1 CNOT6L RHOA SDCBP TNF VPS4B SRC CEP120 PLK4 CCP110 HAP1 ARHGEF5 KCTD17 SDC4 PROX1 MNS1 RAB3GAP2 CEP135 CENPJ CNOT1 RP1 MYLK3 RALB HTT PIP4K2C
POSITIVE_REGULATION_OF_LIPASE_ACTIVITY	0.00164204	0.0135741	0.531014	1.86597	0	64	44	KIT PDGFRA ESR1 LPAR1 NTRK2 ADCYAP1R1 ARF4 PTAFR GNA13 EGFR AVPR1A FGFR2 EDNRA CCL5 P2RY12 C5AR1 RHOA FGFR3 PRKCZ AGT FGF2 SELE GNA15 P2RY6 ABL2 PLCB2 ANG GPR55 ADRA1A APOC2 APOH ITK TXK APOA5 PLCG1 PDPK1 LPAR2 FGFR1 HTR2B S1PR4 NTRK3 ABHD5 GNAQ RHOC
POSITIVE_REGULATION_OF_LYMPHOCYTE_MEDIATED_IMMUNITY	0.00160772	0.0135741	0.53074	1.91513	0	73	30	C3 B2M FCER1G IL1R1 RSAD2 TGFB1 SASH3 HPX P2RX7 PTPRC BTK VAV1 MSH6 KLRK1 LAG3 RASGRP1 AP1G1 SLAMF6 TNF IL18R1 MALT1 CD40 STAT6 CD226 IL18 PRKCZ GATA3 IL12RB1 TRAF6 TBX21
REGULATION_OF_ERYTHROCYTE_DIFFERENTIATION	0.00327332	0.0202312	0.530605	1.73699	1	42	22	B2M NCKAP1L LYN INPP5D SENP1 TAL1 STAT1 NCAPG2 ID2 ZFP36L1 STAT3 HIF1A FOXO3 HMGB2 FAM210B HSPA1B CDK6 ZFPM1 ISG15 GATA1 GATA2 ANKRD54
FORELIMB_MORPHOGENESIS	0.0066778	0.0335859	0.530189	1.69113	3	38	20	RECK OSR1 SHOX2 NIPBL ALDH1A2 ATRX GDF5 FMN1 MSX2 CRABP2 OSR2 HOXA11 TFAP2A IFT122 TWIST1 RNF165 RPGRIP1L TFAP2B MSX1 CACNA1C
REGULATION_OF_TOLL_LIKE_RECEPTOR_SIGNALING_PATHWAY	0.00165017	0.0135741	0.529685	1.84704	0	61	27	ESR1 CAV1 IRF4 LYN TLR4 RSAD2 TLR5 CD300A IRF7 PTPN22 F2RL1 IRAK3 TICAM2 TLR9 TNFAIP3 CD14 TLR3 LBP MFHAS1 CD300LF CYBA GRAMD4 CD36 TLR1 TYRO3 IRF1 LTF
CELL_DIFFERENTIATION_INVOLVED_IN_KIDNEY_DEVELOPMENT	0.00327332	0.0202312	0.529669	1.80075	1	52	29	IQGAP1 PRKX BASP1 ACTA2 SMO ADIPOQ OSR1 MYO1E CD34 MTSS1 WT1 WWTR1 STAT1 GLI3 PTCH1 SALL1 PAX2 TCF21 GDNF PROM1 CITED1 PODXL MAGI2 GATA3 GREM1 MMP9 PTPRO NOTCH1 PAX8
POSITIVE_REGULATION_OF_PRODUCTION_OF_MOLECULAR_MEDIATOR_OF_IMMUNE_RESPONSE	0.00162602	0.0135741	0.529382	1.92306	0	79	37	B2M FCER1G IL1R1 TLR4 RSAD2 CD74 TGFB1 SASH3 HPX F2RL1 TLR9 PTPRC DDX58 GPRC5B KLK7 MAPK3 TNFRSF14 MSH6 RBP4 HK1 CD36 IL33 IL18R1 MALT1 DDX21 CD40 NR4A3 STAT6 CD226 IL18 FFAR2 PRKCZ GATA3 MZB1 TRAF6 SEMA7A TBX21
POSITIVE_REGULATION_OF_CELL_KILLING	0.00327332	0.0202312	0.529272	1.73262	1	42	19	B2M ITGAM TYROBP F2RL1 P2RX7 PTPRC STAP1 VAV1 KLRK1 LAG3 PRF1 RASGRP1 ARG1 AP1G1 SLAMF6 BCL2L11 CD226 NOS2 IL12RB1
INFLAMMATORY_RESPONSE	0.0013947	0.0135741	0.529186	2.41084	0	600	303	CYBB AXL CXCL9 APOE CD68 IGFBP4 NOX4 PPARG C3 KIT XIAP IL1RL2 PTGIS CD44 ANXA1 TLR8 IL6ST AKT1 RARRES2 LIPA ITGAM IGF1 ESR1 CCR1 MGLL TLR7 CCR5 FCER1G IL1R1 APP PIK3AP1 ADAMTS12 TNFRSF1B CCL8 CAMK1D TNFRSF1A GRN TYROBP LYN C1QA CSF1R ABCD2 OSMR STK39 NT5E F2R CMA1 CDO1 PTAFR SIGLEC1 PIK3CG SERPINF1 PLA2G2D DHX9 APOD IL17RC CD163 AHSG FOLR2 CLEC7A FCGR2B C3AR1 ENPP3 SELP TLR4 DNASE1L3 CD180 LY86 C…
ANATOMICAL_STRUCTURE_MATURATION	0.00156495	0.0135741	0.528939	2.09034	0	139	55	NTN4 PTBP3 MYO5A C3 IGF1 RECK APP C1QA RB1 SPINK5 CX3CL1 LRRK2 S1PR1 PGR MMP2 B4GALT6 L3MBTL3 ARCN1 TAL1 PLXNB1 RBPJ PTK2B ALDH1A2 FGG ANO6 EDNRB TYMS NRCAM ACVRL1 FERMT1 BCL11A THBS3 BCL2 RHOA CDH3 CDKN1C HIF1A PDE3A FOXO3 MYOC PAX2 CCNB1 IRX5 RET LTF MSX2 FGFR3 DCHS1 NR4A2 RAC3 FAM210B GATA3 GREM1 CX3CR1 LGI4
CHONDROITIN_SULFATE_PROTEOGLYCAN_METABOLIC_PROCESS	0.00658979	0.0333622	0.528746	1.67633	3	36	18	DCN DSE BGN UGDH CHST11 VCAN DSEL CHST3 CHPF CHST15 CHST12 CHSY1 NDNF CSGALNACT1 XYLT2 XYLT1 CYTL1 CSPG5
GLIAL_CELL_PROLIFERATION	0.00165017	0.0135741	0.528069	1.74757	0	44	24	PRKCI LYN CSF1R PENK SOX4 CX3CL1 CSF1 PTK2B CREB1 TSPO PTN CERS2 E2F1 IL33 TNF AREG SKI PRKCH EEF2 LGI4 MYB CLU NOTCH1 GFAP
LEUKOCYTE_CHEMOTAXIS	0.00155763	0.0135741	0.527829	2.15688	0	175	101	CXCL9 KIT GAS6 ANXA1 RARRES2 NCKAP1L CCR1 CCR5 FCER1G CXADR CCL8 CAMK1D NBL1 LYN STK39 THBS4 PIK3CG IL17RC ADAM10 C3AR1 SWAP70 ITGA1 ITGB2 CD74 LGMN PREX1 THBS1 LGALS9 BST1 LGALS3 F2RL1 SYK ITGA9 RAC2 CX3CL1 LBP S1PR1 IL17RA CSF1 CXCL16 ADAM8 SLAMF8 PF4 MAPK3 TRPV4 PTK2B STAP1 MOSPD2 CCL5 VAV1 CALR ANO6 EDN1 EDNRB S100A14 KLRK1 CXCL12 CXCR5 SLIT2 C5AR1 GPR183 IL1RN TRPM2 CNR2 PIP5K1C CCR2 CCL2 HS…
FOREBRAIN_CELL_MIGRATION	0.00327332	0.0202312	0.527225	1.79244	1	52	22	AXL LAMB1 SEMA3A EGFR PSEN1 LRRK2 RELN GLI3 ROBO1 P2RY12 EMX2 SRGAP2 DIXDC1 CXCL12 NRP2 SLIT2 RHOA ARL13B LHX6 TYRO3 MBOAT7 DAB1
REGULATION_OF_LYMPHOCYTE_APOPTOTIC_PROCESS	0.00164474	0.0135741	0.527069	1.78131	0	49	27	LYN CD74 PRELID1 LGALS9 LGALS3 P2RX7 ADAM8 BTK CCL5 CD274 IRS2 DOCK8 IL7R HIF1A ADA RIPK3 SLC39A10 CD3G PDCD1 PTEN NFKBID BLM IDO1 AURKB CD27 ARG2 FOXP1
REGULATION_OF_CELL_JUNCTION_ASSEMBLY	0.00159236	0.0135741	0.526887	1.94397	0	85	47	SFRP1 PTPRJ GPM6B MAP4K4 IQGAP1 CLDN1 CAV1 ACE MYO1C MMP14 APOD RAP1B THBS1 CORO1C DLC1 FAM107A THY1 PPM1F CAMSAP3 ACVRL1 RHOA EFNA5 ROCK1 EPHA3 RUNX1 RCC2 SMAD3 MYOC TNF TJP1 TEK FMN1 S100A10 SRC PTEN AGT PRKCH GREM1 HRG SLC9A1 ARHGAP6 OCLN SDC4 PHLDB2 LRP1 LIMS1 KDR
REGULATION_OF_LONG_TERM_SYNAPTIC_POTENTIATION	0.0066778	0.0335859	0.526847	1.68047	3	38	17	MME APOE APP TYROBP LGMN RELN EPHB2 FAM107A CREB1 CALB1 PPP1R9A ADCY1 NCSTN NSG1 IGSF11 EPHA4 CX3CR1
MONONUCLEAR_CELL_DIFFERENTIATION	0.0100334	0.0455412	0.526837	1.63544	5	33	16	PPARG CSF1R CD74 IRF7 INPP5D CSF1 FASN MYC ZFP36L1 CD4 SP3 MYH9 GPR68 FES FOXP1 CDK6
PROTEOGLYCAN_METABOLIC_PROCESS	0.00161812	0.0135741	0.526476	1.88427	0	71	34	DCN SULF2 DSE BGN UGDH CHST11 SULF1 HPSE EXT1 VCAN CHST14 DSEL HS3ST3B1 HS3ST1 HS2ST1 CHST3 CHPF SGSH CHST15 CHST12 CHSY1 COL11A1 VANGL2 GLCE NDNF NDST1 HS3ST3A1 IHH CSGALNACT1 XYLT2 NDST2 XYLT1 CYTL1 CSPG5
REGULATION_OF_LEUKOCYTE_MEDIATED_IMMUNITY	0.0015361	0.0135741	0.526429	2.11526	0	151	66	C3 B2M ITGAM FCER1G IL1R1 TNFRSF1B LYN PTAFR FCGR2B TLR4 DNASE1L3 RSAD2 GAB2 ITGB2 TGFB1 CD300A LGALS9 SASH3 HPX F2RL1 SYK P2RX7 RAC2 ADORA2B BST2 PTPRC STXBP2 DDX58 TLR3 PTPN6 STXBP1 CD84 CEACAM1 BTK FGR VAV1 MSH6 WAS BCR IL7R KLRK1 LAG3 IL13RA2 SERPINB9 RASGRP1 HMOX1 HAVCR2 ARG1 AP1G1 SLAMF6 RIPK3 TNF IL18R1 MALT1 CCR2 DDX21 CD40 IL27RA STAT6 CD226 CD96 CD177 IL18 PRKCZ GATA3 FES
REGULATION_OF_BONE_MINERALIZATION	0.00162866	0.0135741	0.526394	1.84745	0	63	29	GPM6B DDR2 COMP OMD CCR1 SRGN AHSG TGFB1 OSR1 P2RX7 MGP ENPP1 S1PR1 ECM1 PTK2B ANO6 ZMPSTE24 FBN2 TMEM119 BMPR2 HIF1A SMAD3 BMP7 LTF TXLNG OSR2 BMPR1B TFAP2A GREM1
FIBROBLAST_MIGRATION	0.00815661	0.0395133	0.526022	1.66608	4	35	18	DDR2 SGPL1 AKT1 ARID5B TGFB1 THBS1 GNA12 PRR5L CORO1C BAG4 PAK3 BRAF RCC2 ARHGAP4 PML HAS1 FGF2 SDC4
NATURAL_KILLER_CELL_ACTIVATION	0.00327332	0.0202312	0.525932	1.78805	1	52	26	AXL GAS6 MERTK TYROBP ITGB2 PTPN22 CASP8 SLAMF7 PTPRC ID2 ELF4 KLRK1 CD2 RASGRP1 HAVCR2 AP1G1 IL18R1 TYRO3 SP3 CORO1A PGLYRP2 IL18 PRDM1 TOX IL21R RAB27A
LIPOSACCHARIDE_METABOLIC_PROCESS	0.00165017	0.0135741	0.525905	1.7404	0	44	22	KIT GM2A ASAH1 GLTP SMPD3 CERK ESYT1 PGAP1 GLB1 HEXB GALC B3GALNT1 B4GALNT1 ARSA ITGB8 ESYT2 UGCG ESYT3 GBA ST6GALNAC4 CLN6 ST6GALNAC3
LEUKOCYTE_APOPTOTIC_PROCESS	0.00159236	0.0135741	0.52568	1.95566	0	92	54	AXL GAS6 MERTK ANXA1 AKT1 CCR5 FCER1G RIPK1 LYN CD74 PRELID1 IRF7 LGALS9 LGALS3 HCLS1 P2RX7 SLC7A11 ADAM8 CASP3 BTK GLI3 CCL5 CD274 IRS2 DOCK8 IL7R CXCL12 IL2RA HIF1A ADA RIPK3 BCL2L11 SLC39A10 NR4A3 CD3G PDCD1 CXCR2 CTSL PTEN NFKBID BLM IDO1 AURKB CD27 ARG2 PIK3CB FOXP1 CCL19 ADAM17 TRAF3IP2 ITPKB TNFRSF21 GIMAP8 RAPGEF2
B_CELL_MEDIATED_IMMUNITY	0.0015873	0.0135741	0.525589	1.97072	0	95	41	C3 C2 SERPING1 TLR8 C1S C1QB FCER1G C6 C1QA C1QC FCGR2B C4B SWAP70 CD74 TGFB1 C1RL IRF7 INPP5D C7 HPX PTPRC PTPN6 BTK MSH6 IL13RA2 BCL3 CD81 CFI TNF CD40 IL27RA STAT6 CD226 CCR6 CD27 POU2F2 TBX21 BATF CD19 CLU MBL2
ADENYLATE_CYCLASE_INHIBITING_G_PROTEIN_COUPLED_RECEPTOR_SIGNALING_PATHWAY	0.00164474	0.0135741	0.525572	1.85217	0	66	28	ADCY3 RGS2 LPAR1 GNAI3 PSAPL1 GNAI2 S1PR1 ADCY7 EDNRA GNAL P2RY12 EDN1 FLNA AKAP12 NPY1R GNAI1 CASR ADCY5 ADCY1 FPR2 MARCO ADRA2A RGS1 GNAZ ADCY6 GRIK3 GPR176 S1PR3
REGULATION_OF_INFLAMMATORY_RESPONSE	0.00150602	0.0135741	0.52446	2.25734	0	290	149	APOE PPARG C3 XIAP IL1RL2 PTGIS ANXA1 IL6ST ITGAM IGF1 ESR1 MGLL TLR7 FCER1G IL1R1 APP PIK3AP1 ADAMTS12 TNFRSF1B TNFRSF1A GRN LYN C1QA ABCD2 OSMR STK39 NT5E CMA1 PIK3CG SERPINF1 DHX9 APOD IL17RC AHSG FCGR2B ENPP3 TLR4 DNASE1L3 ZYX ITGB2 PTGER3 ADIPOQ TGM2 SIRPA ACP5 HCK BST1 EGFR PYCARD APOA1 TLR9 CEBPA TNFAIP3 ADORA2B RB1 PTPRC CX3CL1 TMEM173 ATM HGF LRRK2 TLR3 LBP TNFAIP8L2 IL17RA MFHAS1 PDCD4 …
POSITIVE_REGULATION_OF_CELL_ADHESION	0.00145138	0.0135741	0.524399	2.30404	0	354	173	MMRN1 SFRP1 PTPRJ TGFBR2 IL1RL2 MAP4K4 HSD17B12 CD44 ITGA6 ANXA1 IL6ST SFRP2 DPP4 AKT1 IQGAP1 NCKAP1L ABI3BP IGF1 CAV1 LYN ITGA4 GCNT2 FYN APBB1IP CYTH3 PTAFR VIT DOCK5 CD74 TGFB1 TGM2 SIRPA CARD11 PREX1 TNFRSF13C LGALS9 SASH3 RSU1 VCAM1 EMP2 PYCARD SYK APOA1 CD83 ALOX15 PTPRC CX3CL1 ATM CSK NID1 ECM2 UTRN EMILIN2 PDPN FGB FGA PTPN6 CSF1 MYADM PAK2 BAG4 PNP ADAM8 PTK2B THY1 VNN1 TNFSF13B CCDC88B …
ENDOTHELIUM_DEVELOPMENT	0.0016	0.0135741	0.523522	2.00703	0	109	65	CLIC4 MSN HEG1 CLDN1 MET ADAMTS12 TNFRSF1A PECAM1 TNMD RAP1B EZR TJP2 ANXA2 F2RL1 CD34 COL23A1 ADD1 S1PR1 PDPN COL18A1 MYADM CEACAM1 FASN RBPJ STC1 WNT7B S1PR2 STARD13 ACVRL1 PTN BMPR2 RHOA ICAM1 ROCK1 APOLD1 SCUBE1 TNF TJP1 GJA5 F11R MARVELD2 ZEB1 ENG ARHGEF26 TMEM100 FOXP1 PLOD3 SOX17 PROX1 GPX1 XDH KDR NOTCH1 BTG1 RAPGEF2 RHOB SMAD4 CXCL10 PRKD2 ATOH8 HEY2 WNT7A PPP1R16B S1PR3 NRP1
REGULATION_OF_PLASMA_LIPOPROTEIN_PARTICLE_LEVELS	0.00162866	0.0135741	0.523004	1.90591	0	81	43	APOC1 APOE ALB LIPA SOAT1 NPC2 DGAT1 ABCA1 ADIPOQ APOBR ANXA2 PLTP APOA1 MSR1 AP2B1 CSK LIPG APOB EHD1 ABCA5 APOA2 ABCG1 CD36 APOC3 HNRNPK HMOX1 MYLIP MTTP LDLR CLTA AGT APOC4 LPL CLTC LDLRAP1 DGAT2 LIPC NR1H4 APOC2 APOA5 CUBN PLAGL2 P4HB
CYTOKINE_METABOLIC_PROCESS	0.0015873	0.0135741	0.522881	2.00255	0	106	54	CYBB TLR8 TLR7 APP IRF4 TYROBP CMA1 PTAFR IGF2BP2 TLR4 CARD11 THBS1 IRF7 TNFRSF13C INPP5D PCSK5 SYK TLR9 IL1RAP PTPRC TLR3 LBP EGR1 SPN INHBB APOA2 LAG3 STAT3 CD86 NFKB1 BCL3 CD4 ERRFI1 TLR1 CEBPE HMOX1 NMI TNF IRF1 CCR2 CD3E RELA IL18 LTB GATA3 TBK1 PAWR CX3CR1 KLF4 CD276 TRAF6 EBI3 ZFPM1 TLR6
INOSITOL_LIPID_MEDIATED_SIGNALING	0.00151745	0.0135741	0.52284	2.12274	0	163	73	DCN KIT PLCB1 PIK3C2A PDGFRA PDGFC AKT1 NCF1 NEDD4 IGF1 PIK3AP1 PLCE1 NTRK2 LYN CSF1R F2R FYN PTAFR PTPN13 PIK3CG PIP4K2A EZR SELP ENTPD5 GAB2 PLCG2 EGFR GSN F2RL1 PIK3R5 HCLS1 PRR5L CBL HGF RELN PTPN6 PLCB3 CEACAM1 FGR MAPK3 PLXNB1 CAT PI4KA ZFP36L1 CCL5 EDN1 IRS2 PREX2 PRR5 JAK2 ERBB3 RHOA FLT3 FLT4 RASGRP1 PDGFD MYOC TNF TYRO3 F2 PIP5K1C TEK SLC9A3R1 ERBB4 SRC PTEN IL18 AGT GATA3 PIK3C3 SERPIN…
CELL_SUBSTRATE_JUNCTION_ASSEMBLY	0.0016	0.0135741	0.522678	1.94955	0	93	53	SFRP1 PTPRJ GPM6B MAP4K4 ITGA6 ACTN1 IQGAP1 KRT14 MMP14 APOD THBS1 CORO1C DLC1 COL17A1 FAM107A PTK2B THY1 LAMC2 ITGA2 SORBS1 KRT5 FN1 ITGB4 TRIP6 PPM1F CAMSAP3 ACVRL1 BCL2 PTPRK RHOA EFNA5 ROCK1 EPHA3 RCC2 SMAD3 MYOC CTTN TEK FMN1 S100A10 SRC PTEN LAMA3 GREM1 HRG SLC9A1 ARHGAP6 SDC4 PHLDB2 LRP1 LAMC1 LIMS1 KDR
NATURAL_KILLER_CELL_MEDIATED_IMMUNITY	0.00491803	0.0270265	0.522642	1.71527	2	43	24	LGALS9 SLAMF7 PTPN6 CEACAM1 VAV1 GZMB KLRK1 LAG3 SERPINB9 RASGRP1 HAVCR2 AP1G1 SLAMF6 CORO1A LYST CD226 CD96 IL18 KLRD1 RAB27A ARRB2 CADM1 IL18RAP UNC13D
POSITIVE_REGULATION_OF_NIK_NF_KAPPAB_SIGNALING	0.00163934	0.0135741	0.522223	1.84664	0	68	38	ACTN4 TRIM44 TLR7 APP TLR4 LGALS9 EGFR CHI3L1 TLR9 CD14 TLR3 PDCD4 EDA CALR EDN1 TRIP6 EIF2AK2 RHOA HAVCR2 TNF IL18R1 SASH1 MALT1 TRAF4 SPHK1 RELA IL18 GREM1 CD27 TLR2 TRAF6 CCL19 MMP8 TNFSF14 TLR6 LIMS1 RBCK1 TNFSF15
T_CELL_APOPTOTIC_PROCESS	0.00490998	0.0270265	0.5221	1.70915	2	42	22	AKT1 RIPK1 PRELID1 LGALS9 LGALS3 ADAM8 GLI3 CCL5 CD274 DOCK8 IL7R IL2RA HIF1A ADA RIPK3 BCL2L11 PDCD1 NFKBID BLM IDO1 CD27 ARG2
O_GLYCAN_PROCESSING	0.00330579	0.0202312	0.52202	1.76631	1	50	26	ST3GAL1 GALNT15 GCNT1 C1GALT1 GXYLT1 MUC4 ST6GAL1 B3GNT3 B3GNT2 MUC15 GALNT12 ST3GAL4 B3GNT7 GALNT4 MUC1 GALNT10 GALNT7 GALNT6 GALNT2 ST6GALNAC4 GALNT5 B3GNT5 B3GNT8 MUC20 GCNT4 GCNT3
SMOOTH_MUSCLE_CELL_PROLIFERATION	0.00155521	0.0135741	0.521803	2.0559	0	130	64	TGFBR2 PPARG IGFBP3 OGN PDE1A AKT1 IGF1 GNAI3 MAP3K5 PTAFR SMPD3 APOD ADIPOQ TGM2 THBS1 EGFR HPGD GNAI2 TNFAIP3 CX3CL1 HMGCR FGFR2 S1PR1 MMP2 PDCD4 RBPMS2 STAT1 CALCRL CNN1 ITGA2 ID2 CCL5 EDN1 IRAK4 JAK2 APLN CYBA IGFBP5 ERN1 HMOX1 DNMT1 PDGFD TNF PPARGC1A HDAC4 NR4A3 MYOCD PTEN IL18 SERPINF2 AGT FGF2 KLF4 FOXP1 AIF1 TRAF6 MYB NPR1 P2RY6 LDLRAP1 MMP9 NDRG4 ANG VIPR2
REGULATION_OF_CELL_ADHESION	0.00138889	0.0135741	0.521589	2.37858	0	605	290	MMRN1 TGFBI SFRP1 ACTN4 FBLN1 PTPRJ TGFBR2 GPM6B DDR2 IL1RL2 MAP4K4 HSD17B12 EPCAM CD44 ITGA6 ANXA1 IL6ST SFRP2 CYP1B1 POSTN DPP4 AKT1 IQGAP1 GPNMB NCKAP1L ABI3BP IGF1 PRKX CAV1 MBP ARHGDIA TNC LYN ITGA4 MMP14 PDE3B CD9 TWSG1 GCNT2 FYN LAMA4 APBB1IP CYTH3 PTAFR PIK3CG PLA2G2D VIT APOD ACER2 DOCK5 ADAM10 FCGR2B CDH1 SWAP70 FERMT3 PDE5A CD74 TACSTD2 ADTRP ADAM15 TGFB1 ADIPOQ TGM2 SIRPA PLXNA4 CARD1…
CHONDROCYTE_DIFFERENTIATION	0.00156986	0.0135741	0.521061	2.00505	0	110	58	TGFBI SULF2 POR COL14A1 TGFBR2 SCARA3 SFRP2 COMP COL12A1 CHST11 ADAMTS12 EFEMP1 SULF1 SMPD3 VIT MATN2 TGFB1 ANXA2 EIF2AK3 OSR1 GLG1 SHOX2 LOXL2 ECM1 GLI3 RUNX3 WNT2B ACVRL1 GDF5 BMPR2 COCH SMAD3 CHSY1 COL11A1 IFT80 COL27A1 MSX2 OSR2 FGFR3 HOXA11 IHH RELA BMPR1B TRIP11 PTH1R GREM1 VWA1 HMGA2 CREB3L2 SOX5 SERPINH1 CYTL1 TRPS1 GLI2 MATN4 MBL2 COL6A2 COL6A1
REGULATION_OF_MULTICELLULAR_ORGANISM_GROWTH	0.00162075	0.0135741	0.520331	1.82285	0	62	27	SGPL1 SH3PXD2B IGF1 APP PLAC8 EZR SMO LGMN FGFR2 ATRN CSF1 NIPBL CREB1 PPIB ZMPSTE24 STAT3 PLS1 GDF5 BCL2 BBS2 NPY1R PTCH1 PTPN11 DIO3 GHR IGF2 CDK4
SERINE_FAMILY_AMINO_ACID_METABOLIC_PROCESS	0.00815661	0.0395133	0.520289	1.64792	4	35	11	CBS PSAT1 CDO1 PHGDH SERINC3 SERINC5 SLC25A32 SLC7A11 GCLC GLDC GGT1
NEGATIVE_REGULATION_OF_CHEMOTAXIS	0.0033389	0.0202656	0.519983	1.76525	1	53	28	SEMA3D SEMA4A NBL1 SEMA3F SEMA3A THBS1 CORO1B SEMA5A ANGPT2 SLAMF8 SEMA3E STAP1 SEMA3G ROBO1 SEMA4B KLRK1 SLIT2 SEMA3C CCL2 MMP28 GREM1 HRG AIF1 SEMA6B SEMA7A GPR18 PTPRO NOTCH1
CORTICAL_CYTOSKELETON_ORGANIZATION	0.00666667	0.0335802	0.519785	1.68009	3	40	18	NCKAP1 NCKAP1L WIPF1 EZR RACGAP1 TRPV4 PDCD6IP WAS CALR PLEK PLS1 FMNL2 EHD2 ROCK1 TNF ANLN WDR1 ARF6
POSITIVE_REGULATION_OF_LEUKOCYTE_DIFFERENTIATION	0.0015674	0.0135741	0.519743	2.04672	0	131	64	AXL TGFBR2 GAS6 IL1RL2 ANXA1 NCKAP1L CCR1 RIPK1 TYROBP MMP14 CD74 TGFB1 INPP5D LGALS9 CASP8 SASH3 SYK HCLS1 CD83 RB1 PTPRC CSF1 PNP ADAM8 BTK PF4 VNN1 ATP11C ID2 ZFP36L1 CREB1 GLI3 AP3B1 EVI2B RUNX3 IL7R IL7 CD86 IL2RA LILRB4 RHOA CD4 ADA RASGRP1 RUNX1 ROR2 TNF MALT1 ZMIZ1 SOCS1 IHH IL18 NFKBID GPR68 PRKCZ GATA3 EGR3 FES CD27 TOX IL12RB1 TRAF6 CCL19 MYB
ADAPTIVE_IMMUNE_RESPONSE	0.0014771	0.0135741	0.519287	2.25005	0	308	163	C3 C2 SERPING1 B2M ANXA1 TLR8 IL6ST C1S C1QB ALCAM CTSH UNC93B1 NEDD4 CTSC FCER1G IL1R1 SEMA4A TNFRSF1B C6 IRF4 LYN C1QA RNF125 C1QC FYN PIK3CG FCGR2B CTSS PRKCB TLR4 C4B RSAD2 SWAP70 CD74 TGFB1 C1RL IRF7 TNFRSF13C INPP5D C7 SASH3 SLC11A1 EMP2 SLAMF7 HPX PYCARD SYK P2RX7 ALOX15 LAIR1 LILRB3 TNFAIP3 PTPRC PAG1 TAP2 CSK CLEC10A SAMSN1 FGB FGA LY9 PTPN6 ADCY7 CD84 SPN CEACAM1 BTK PTK2B TNFSF13B TAP1…
LYMPHOCYTE_ACTIVATION	0.00138313	0.0135741	0.519275	2.36084	0	566	278	SFRP1 AXL PTPRJ TGFBR2 KIT GAS6 MSN IL1RL2 LEPR DOCK11 MERTK CD44 B2M ANXA1 IL6ST DPP4 AKT1 GPNMB NCKAP1L NEDD4 IGF1 FCER1G SEMA4A CXADR CAV1 TNFRSF1B IRF4 TYROBP LYN ITGA4 MMP14 TWSG1 FYN APBB1IP PIK3CG PLA2G2D PRLR CLEC7A FCGR2B PRKCB TLR4 CCND3 CD180 RSAD2 SWAP70 MNDA ITGB2 PLCG2 PDE5A CD74 SOX4 TGFB1 PRELID1 SIRPA CARD11 PREX1 DOCK10 CD300A TNFRSF13C PTPN22 NFAM1 INPP5D DTX1 LGALS9 BST1 LCP1 …
POSITIVE_REGULATION_OF_CYTOKINE_PRODUCTION	0.0014556	0.0135741	0.519256	2.29505	0	382	191	CYBB SULF2 PTPRJ C3 PLCB1 IL1RL2 HEG1 B2M ANXA1 TLR8 IL6ST ZBP1 CYP1B1 POSTN TLR7 FCER1G IL1R1 APP MBP IRF4 RIPK1 TYROBP CSF1R RNF125 F2R SULF1 PTAFR DHX9 IL17RC HPSE C3AR1 LUM TLR4 RSAD2 TLR5 PLCG2 IRF5 CD74 TGFB1 ADIPOQ CARD11 THBS1 IRF7 TNFRSF13C PTPN22 NFAM1 LGALS9 EIF2AK3 SASH3 CCBE1 SLC11A1 F2RL1 PYCARD SYK CASP1 CD34 CD83 P2RX7 TLR9 IFIH1 IL1RAP ADORA2B CD14 PTPRC CX3CL1 TMEM173 AGPAT2 HGF…
ADHERENS_JUNCTION_ASSEMBLY	0.00159236	0.0135741	0.519144	1.9154	0	85	47	SFRP1 PTPRJ GPM6B MAP4K4 ACTN1 IQGAP1 MMP14 APOD THBS1 CORO1C DLC1 FAM107A PTK2B THY1 ITGA2 SORBS1 TRIP6 PPM1F CAMSAP3 ACVRL1 HIPK1 BCL2 PTPRK RHOA EFNA5 ROCK1 EPHA3 RCC2 SMAD3 MYOC DLG5 CTTN PIP5K1C TEK FMN1 S100A10 SRC PTEN GREM1 HRG SLC9A1 ARHGAP6 SDC4 PHLDB2 LRP1 LIMS1 KDR
CARDIAC_MUSCLE_CELL_PROLIFERATION	0.00162866	0.0135741	0.51912	1.74218	0	47	26	TGFBR2 CXADR RIPK1 KCNK2 FGFR2 RBPJ RBP4 GATA6 MAPK11 WNT2 TENM4 ZFPM2 CCNB1 TGFBR3 ERBB4 PTEN FGF2 ARID2 NDRG4 NOTCH1 FOXC1 SAV1 TGFBR1 HEY2 PIM1 FGFR1
STEROL_TRANSPORT	0.0015949	0.0135741	0.518678	1.92307	0	88	46	APOC1 APOE LIMA1 PPARG TTC39B CAV1 SOAT1 STARD5 NPC2 ABCA1 ADIPOQ ANXA2 PLTP APOA1 SREBF2 MSR1 LIPG APOB PON1 STARD4 ABCA5 OSBPL5 APOA2 TSPO ABCG1 NFKB1 LRP6 CD36 APOC3 OSBP2 ABCA12 PTCH1 VPS4B LDLR OSBPL10 OSBPL11 GRAMD1C LDLRAP1 LRP1 CLU GRAMD1B LIPC APOC2 OSBPL3 ABCA2 SYT7
REGULATION_OF_B_CELL_MEDIATED_IMMUNITY	0.00833333	0.0399217	0.51866	1.67646	4	40	14	C3 FCER1G FCGR2B TGFB1 HPX PTPRC PTPN6 BTK MSH6 TNF CD40 IL27RA STAT6 CD226
RESPONSE_TO_ZINC_ION	0.00830565	0.0398671	0.518639	1.6674	4	39	20	KCNK3 KRT14 P2RX4 VCAM1 ATP7A P2RX7 APOBEC1 CREB1 HVCN1 TSPO SLC30A5 ARG1 CPS1 PTEN CRIP1 HAAO SLC30A4 S100A8 HAMP D2HGDH
POSITIVE_REGULATION_OF_RESPONSE_TO_BIOTIC_STIMULUS	0.00661157	0.0333943	0.517843	1.68811	3	41	20	GRN CD180 LY86 F2RL1 KLK7 MAPK3 CD274 KLRK1 CYBA ZCCHC3 HAVCR2 ARG1 SASH1 DDX60 CD226 DHX58 TBK1 HRG UNC13B TRAF6
POSITIVE_REGULATION_OF_RESPONSE_TO_EXTERNAL_STIMULUS	0.00150376	0.0135741	0.51756	2.21256	0	269	137	C3 GAS6 IL6ST RARRES2 NCKAP1L ITGAM CCR1 TLR7 FCER1G MET APP LPAR1 CAMK1D TNFRSF1A GRN C1QA OSMR STK39 THBS4 P2RX4 PIK3CG DHX9 IL17RC ADAM10 C3AR1 TLR4 CD180 LY86 SWAP70 ITGB2 CD74 PTGER3 TGFB1 LGMN TGM2 THBS1 LGALS9 SEMA5A EGFR F2RL1 TLR9 CEBPA RAC2 ADORA2B CX3CL1 LRRK2 TLR3 LBP S1PR1 IL17RA PLG PDCD4 CSF1 GPRC5B ADAM8 BTK KLK7 MAPK3 IL17RB TRPV4 PTK2B STAP1 MOSPD2 ITGA2 CCL5 P2RY12 CALR ANO6 ED…
POSITIVE_CHEMOTAXIS	0.00164204	0.0135741	0.517084	1.78419	0	57	32	PTPRJ GPNMB MET SEMA5A LGALS3 F2RL1 ANGPT2 CX3CL1 HGF S1PR1 ITGA2 CCL5 CXCL12 FGF10 F3 SMAD3 HMGB2 CASR CORO1A FGF7 FPR2 GDNF FGF2 LRP1 KDR VEGFC IL16 CCL3 SAA1 CXCL10 NRP1 WNT5A
RESPONSE_TO_CHEMOKINE	0.00160514	0.0135741	0.517073	1.86118	0	72	45	CXCL9 LOX SLIT3 CCR1 CCR5 CCL8 STK39 CX3CL1 PF4 PTK2B CCL5 ROBO1 EDN1 DOCK8 CXCL12 CXCR5 SLIT2 RHOA HIF1A LRCH1 CCR2 CCL2 TREM2 CMKLR1 CCL7 CCR6 CXCR2 CX3CR1 CXCR3 CCL19 XCR1 GPR35 FOXC1 CCL22 CCL3 CCL4 ZC3H12A CXCL10 WNK1 CCL24 CXCR4 CCL11 CXCL1 CCRL2 CXCL13
HEART_VALVE_DEVELOPMENT	0.00332779	0.0202312	0.516974	1.76685	1	55	34	TGFBR2 SLIT3 TNFRSF1B TNFRSF1A SOX4 TGFB1 STRA6 RB1 SHOX2 RBPJ ROBO1 NOTCH2 SLIT2 BMPR2 ROCK1 OLFM1 GJA5 FGFRL1 DCHS1 GATA3 PRDM1 NOS3 TWIST1 ADAMTS9 ZFPM1 NOTCH1 SNAI1 SMAD4 HEY2 ROBO2 SMAD6 BMP2 HEY1 SNAI2
POSITIVE_REGULATION_OF_FIBROBLAST_PROLIFERATION	0.00165289	0.0135741	0.51679	1.73916	0	48	26	GAS6 DDR2 PDGFRA PDGFC IGF1 ESR1 DHX9 CD74 TGFB1 ANXA2 EGFR CCNA2 BTC FOSL2 MYC FN1 WNT2 E2F1 FGF10 PDGFD CCNB1 ZMIZ1 PML SPHK1 CDK4 AGT
REGULATION_OF_EXTRACELLULAR_MATRIX_ORGANIZATION	0.00815661	0.0395133	0.516461	1.6358	4	35	18	DDR2 DPP4 ANTXR1 TNFRSF1B TNFRSF1A ADTRP TGFB1 AEBP1 RB1 PDPN CFLAR SMAD3 AGT PHLDB2 LRP1 NOTCH1 FAP DDR1
FEEDING_BEHAVIOR	0.00161812	0.0135741	0.515752	1.86759	0	78	23	NEGR1 LEPR APP NTRK2 CPT1A FYN OXTR STRA6 RETN STAT3 APLN HAND2 NPY1R USP46 NR4A3 CNR1 AGT BBS12 MMP17 CNTFR ADORA2A CCK UBE2Q1
BONE_DEVELOPMENT	0.00155039	0.0135741	0.515403	2.1403	0	194	90	SULF2 POR COL14A1 TGFBR2 LOX KIT PLS3 SCARA3 SH3PXD2B SFRP2 COMP COL12A1 PAPSS2 PDGFC IGF1 TYROBP MMP14 SULF1 PAPPA2 SMPD3 VIT PIP4K2A MATN2 TGFB1 ACP5 ANXA2 LRRC17 PTPRC GLG1 SHOX2 LRRK1 FGFR2 TIFAB SFRP4 PTPN6 TAL1 TRPV4 PLXNB1 STC1 GLI3 ANO6 PPIB ZMPSTE24 NOTCH2 TMEM119 NAB1 WASF2 THBS3 LRP6 ABI1 CHAD BMPR2 RHOA GJA1 COCH PTPN11 MYOC CHSY1 LTF IFT80 TEK COL27A1 DLX5 MSX2 INSIG1 OSR2 MCPH1 FGFR…
TYROSINE_PHOSPHORYLATION_OF_STAT_PROTEIN	0.00163399	0.0135741	0.51511	1.815	0	65	25	KIT IL6ST IGF1 CAV1 TNFRSF1A PECAM1 LYN CSF1R FYN PARP14 HPX HCLS1 PARP9 CCL5 JAK2 STAT3 FLT3 SOCS3 TNF CD40 SOCS1 FGFR3 ERBB4 GHR IL18
NEGATIVE_REGULATION_OF_LYMPHOCYTE_ACTIVATION	0.0015528	0.0135741	0.514943	2.02223	0	127	64	SFRP1 AXL MERTK ANXA1 GPNMB TYROBP LYN TWSG1 PLA2G2D FCGR2B MNDA PDE5A CD74 TGFB1 CD300A PTPN22 INPP5D DTX1 LGALS9 LGALS3 TNFAIP3 PAG1 ATM TNFAIP8L2 SAMSN1 PTPN6 SPN CASP3 CEACAM1 BTK ID2 TNFRSF14 GLI3 CD274 BANK1 RUNX3 VTCN1 LAG3 VSIG4 CD86 IL2RA LOXL3 PLA2G2F LST1 HAVCR2 RUNX1 ARG1 DLG5 ITCH TYRO3 IRF1 SOCS1 PGLYRP2 IHH NFKBID IDO1 PAWR ARG2 TNFRSF13B PDCD1LG2 SDC4 TIGIT TBX21 IL20RB
ADAPTIVE_IMMUNE_RESPONSE_BASED_ON_SOMATIC_RECOMBINATION_OF_IMMUNE_RECEPTORS_BUILT_FROM_IMMUNOGLOBULIN_SUPERFAMILY_DOMAINS	0.00153139	0.0135741	0.51484	2.14828	0	206	94	C3 C2 SERPING1 B2M ANXA1 TLR8 C1S C1QB CTSH CTSC FCER1G IL1R1 SEMA4A TNFRSF1B C6 IRF4 C1QA C1QC FCGR2B TLR4 C4B RSAD2 SWAP70 CD74 TGFB1 C1RL IRF7 TNFRSF13C INPP5D C7 SASH3 SLC11A1 EMP2 HPX P2RX7 TNFAIP3 PTPRC LY9 PTPN6 SPN CEACAM1 BTK TNFSF13B CD274 MSH6 WAS KLHL6 IL7R STAT3 IL13RA2 PRF1 BCL3 ICAM1 CD4 IL33 LOXL3 CD81 ADA HAVCR2 CFI ARG1 SLAMF6 RIPK3 TNF IL18R1 IL1RL1 RORA MALT1 CCR2 CD8A CD40 MY…
COAGULATION	0.0014881	0.0135741	0.514833	2.22434	0	299	145	MMRN1 CSRP1 AXL APOE FBLN1 GAS6 PROS1 ANXA8 SERPING1 PDGFRA DOCK11 MERTK SH2B2 COMP ENTPD1 PAPSS2 CLIC1 GNG2 FCER1G PLAT CAV1 GNB1 LYN VAV2 CD9 F2R FYN F13A1 P2RX4 PIK3CG HPSE ANXA5 PRKCB SELP TLR4 PRKAR2B FERMT3 PLCG2 ADTRP JMJD1C GNA13 PRCP THBS1 ANXA2 GNA12 MAFF F2RL1 SYK PIK3R5 CD34 P2RX7 RAP2B CAPZA1 PSEN1 LCP2 RCOR1 F8 TFPI ABAT C1QTNF1 SLC7A11 PDPN FGB PLG FGA PTPN6 STXBP1 CEACAM1 KRT1 PF4…
MOLTING_CYCLE_PROCESS	0.00157729	0.0135741	0.514767	1.90806	0	86	45	MYO5A CD109 KRT17 KRT71 HPSE SMO EGFR CELSR1 ATP7A SPINK5 FGFR2 RBPJ EDA LDB2 FZD3 ZMPSTE24 FERMT1 BCL2 FGF10 CDH3 FZD6 IGFBP5 APCDD1 HDAC1 SOSTDC1 TNF VANGL2 TNFRSF19 MYSM1 MSX2 KRT25 FGF7 RELA NSDHL FOXQ1 NOTCH1 SAV1 SNAI1 FST KRT27 INHBA SMAD4 INTU NOM1 WNT5A
MYELOID_LEUKOCYTE_ACTIVATION	0.00138696	0.0135741	0.514641	2.33708	0	557	256	FGL2 MME CYBB DSP TIMP2 CD68 PTPRJ EEF1A1 TGFBR2 ARSB C3 KIT GNS GM2A CD44 B2M TLR8 VAT1 PYGB IQGAP1 PGRMC1 ASAH1 CTSH NCKAP1L ITGAM CTSC TLR7 IQGAP2 CMTM6 CTSB FCER1G APP PLAC8 NDRG1 TNFRSF1B IRF4 GRN PECAM1 TYROBP LYN C1QA RAB31 CD33 ACPP NPC2 ACLY CAP1 QPCT COTL1 PIGR SLC27A2 PTAFR PIK3CG ANPEP PYGL ADAM10 RAP1B LRMP AHSG HPSE FCGR2B CTSS C3AR1 ENPP3 PLEKHO2 DGAT1 TLR4 DNASE1L3 HEBP2 GAB2 MNDA…
BONE_MORPHOGENESIS	0.0015873	0.0135741	0.51423	1.96492	0	105	56	POR COL14A1 TGFBR2 SCARA3 SFRP2 COMP COL12A1 MMP14 PAPPA2 SMPD3 VIT MATN2 TGFB1 ACP5 ANXA2 GLG1 SHOX2 FGFR2 TIFAB SFRP4 TRPV4 STC1 GLI3 ZMPSTE24 NAB1 THBS3 LRP6 BMPR2 COCH CHSY1 LTF IFT80 TEK COL27A1 DLX5 MSX2 INSIG1 OSR2 FGFR3 HOXA11 IHH BMPR1B SKI TFAP2A TRIP11 VWA1 CSGALNACT1 TWIST1 SERPINH1 MATN4 MBL2 COL6A2 MMP16 COL6A1 FOXC1 MSX1
ASTROCYTE_DIFFERENTIATION	0.00160772	0.0135741	0.513787	1.85395	0	73	38	IL6ST APP GRN C1QA TLR4 VIM SMO EGFR PSEN1 PLP1 TAL1 MAPK3 LAMC3 ID2 BACE2 STAT3 TSPAN2 C5AR1 S100B PTPN11 ROR2 TNF F2 KRAS TREM2 DAB1 LDLR FPR2 ROR1 TTBK1 EPHA4 ID4 CNTN2 CDK6 LRP1 S100A8 ADORA2A NOTCH1
GLIAL_CELL_DEVELOPMENT	0.00157233	0.0135741	0.513754	1.95536	0	102	52	AKT1 APP NDRG1 LPAR1 NTRK2 GRN LYN C1QA CD9 TLR4 PHGDH VIM SMO SOX4 TGFB1 EGFR GSN PSEN1 PLP1 B4GALT6 MYRF LAMC3 ID2 FA2H BACE2 TSPAN2 C5AR1 TENM4 MYOC WASF3 ROR2 TNF KRAS TREM2 ARHGEF10 NCSTN LDLR FPR2 ROR1 PTEN TTBK1 SKI TLR2 LGI4 ID4 CNTN2 CDK6 LRP1 CLU S100A8 ADORA2A PRDM8
REGULATION_OF_LYMPHOCYTE_ACTIVATION	0.00145138	0.0135741	0.513721	2.26109	0	363	181	SFRP1 AXL TGFBR2 GAS6 IL1RL2 MERTK ANXA1 IL6ST DPP4 AKT1 GPNMB NCKAP1L IGF1 CAV1 TNFRSF1B IRF4 TYROBP LYN MMP14 TWSG1 FYN PLA2G2D FCGR2B TLR4 MNDA PDE5A CD74 TGFB1 PRELID1 SIRPA CARD11 CD300A TNFRSF13C PTPN22 NFAM1 INPP5D DTX1 LGALS9 BST1 GSN SASH3 VCAM1 LGALS3 PYCARD SYK CD83 TLR9 ZFP36L2 RAC2 IKZF3 TNFAIP3 SPINK5 PTPRC PAG1 AHR ATM CSK TNFAIP8L2 SAMSN1 PTPN6 CD38 PAK2 SPN PNP ADAM8 CASP3 CEACAM…
MONOCYTE_CHEMOTAXIS	0.00499168	0.0271547	0.513329	1.70547	2	46	30	ANXA1 CCR1 CCL8 NBL1 LYN LGMN LGALS3 CX3CL1 SLAMF8 MOSPD2 CCL5 ANO6 S100A14 CXCL12 SLIT2 CCR2 CCL2 CCL7 FPR2 GREM1 AIF1 CCL19 PTPRO TNFRSF11A CCL22 CXCL17 CCL3 CCL4 CXCL10 CCL24
MEMBRANE_PROTEIN_ECTODOMAIN_PROTEOLYSIS	0.00826446	0.0397611	0.513114	1.6727	4	41	21	APOE TIMP2 TNFRSF1B SH3D19 ADAM10 TIMP3 P2RX7 PSEN1 ADAM8 ERAP1 BACE2 ROCK1 TNF NCSTN MYH9 SNX9 ADAM17 TIMP1 ADAM19 PSEN2 ADRA2A
LUNG_MORPHOGENESIS	0.00328947	0.0202312	0.513067	1.73399	1	49	20	TGFBR2 CTSH TNC CELSR1 FGFR2 MAPK3 WNT7B WNT2B WNT2 FGF10 ESRP2 FOXP2 GRHL2 DLG5 TNF VANGL2 KRAS TCF21 CTSZ FGF7
MYELOID_CELL_DEVELOPMENT	0.00332226	0.0202312	0.513064	1.7479	1	54	28	PTBP3 KIT NCKAP1L APP TYROBP TMOD3 PIP4K2A ANXA2 LRRK1 PTPN6 L3MBTL3 TAL1 EVI2B NOTCH2 TSPAN2 WASF2 ABI1 RHAG PTPN11 LTF SRC FAM210B GPR68 TLR2 FOXP1 ZFPM1 KLF2 GATA1
REGULATION_OF_T_CELL_ACTIVATION	0.00149701	0.0135741	0.512953	2.19752	0	273	137	TGFBR2 IL1RL2 ANXA1 IL6ST DPP4 AKT1 GPNMB NCKAP1L IGF1 CAV1 TNFRSF1B IRF4 LYN TWSG1 FYN PLA2G2D FCGR2B PDE5A CD74 TGFB1 PRELID1 SIRPA CARD11 CD300A TNFRSF13C PTPN22 DTX1 LGALS9 GSN SASH3 VCAM1 LGALS3 PYCARD SYK CD83 RAC2 SPINK5 PTPRC PAG1 CSK TNFAIP8L2 PTPN6 PAK2 SPN PNP ADAM8 CASP3 CEACAM1 THY1 VNN1 TNFSF13B CCDC88B TNFRSF14 GLI3 CCL5 VAV1 AP3B1 CD274 DOCK8 MAPK8IP1 RUNX3 IL7R VTCN1 PAK3 IL7 KLR…
SMOOTH_MUSCLE_CELL_MIGRATION	0.00164474	0.0135741	0.512936	1.80764	0	66	34	NOX4 IGFBP3 PARVA POSTN IQGAP1 IGF1 PLAT LPAR1 ACE DOCK5 ADIPOQ DOCK7 CORO1B ATP7A ARPC5 ITGA2 CCL5 BCL2 SLIT2 IGFBP5 PLXNA1 PDGFD ITGB3 PPARGC1A NFE2L2 HDAC4 NR4A3 MYOCD SRC AGT AIF1 P2RY6 LRP1 NDRG4
CELL_CHEMOTAXIS	0.00151286	0.0135741	0.512765	2.16877	0	241	130	CXCL9 LOX KIT GAS6 PDGFRA PARVA ANXA1 RARRES2 NCKAP1L CCR1 CCR5 FCER1G MET CXADR CCL8 LPAR1 CAMK1D NBL1 LYN STK39 THBS4 P2RX4 PIK3CG IL17RC ADAM10 C3AR1 SWAP70 ITGA1 ITGB2 CD74 ABCC1 LGMN PREX1 THBS1 LGALS9 CORO1B BST1 SEMA5A VCAM1 BIN2 LGALS3 F2RL1 SYK ITGA9 RAC2 CX3CL1 HGF LBP S1PR1 IL17RA CSF1 CXCL16 ADAM8 SLAMF8 PF4 MAPK3 TRPV4 PTK2B STAP1 MOSPD2 CCL5 VAV1 CALR ANO6 EDN1 EDNRB ARHGEF16 S100A1…
REGULATION_OF_LEUKOCYTE_CHEMOTAXIS	0.0015873	0.0135741	0.512475	1.92155	0	95	46	GAS6 RARRES2 NCKAP1L CCR1 CAMK1D NBL1 LYN STK39 THBS4 ADAM10 C3AR1 SWAP70 CD74 LGMN THBS1 LGALS9 BST1 F2RL1 RAC2 LBP CSF1 SLAMF8 MAPK3 TRPV4 PTK2B STAP1 MOSPD2 CCL5 CALR ANO6 EDN1 S100A14 KLRK1 CXCL12 SLIT2 C5AR1 CCR2 CCL2 MPP1 MMP28 CMKLR1 CCL7 EDN3 FPR2 CCR6 CXCR2
POSITIVE_REGULATION_OF_BLOOD_CIRCULATION	0.00165017	0.0135741	0.51182	1.78474	0	61	28	AKT1 RGS2 CAV1 F2R PTAFR OXTR EGFR F2RL1 ADM AVPR1A FGB FGA CD38 KCNQ1 SCN3B ATP1A1 FGG EDN1 PTGER2 APLN RHOA ICAM1 ADA CASR HRH2 GJA5 EDN3 ADRA2C
SPHINGOLIPID_BIOSYNTHETIC_PROCESS	0.00160256	0.0135741	0.511581	1.89914	0	89	48	SGPL1 SGMS2 ELOVL5 ASAH1 ASAH2 TNFRSF1A SPTLC2 ELOVL4 ST8SIA6 SMPD3 ACER2 PRKD3 ALDH3B2 CERS6 ORMDL3 P2RX7 ELOVL6 ST6GALNAC5 B4GALT6 B3GALT2 CERS5 FA2H SPTLC3 B4GALNT1 SGPP1 ACER3 ELOVL1 CERS2 DEGS1 TNF SGPP2 SGMS1 ALDH3B1 SPTLC1 UGCG SPHK1 ELOVL2 KDSR CERS4 GBA ELOVL7 ACER1 ALDH3A2 PRKD1 ST8SIA4 A4GALT ST6GALNAC3 PRKAA1
REGULATION_OF_BIOMINERAL_TISSUE_DEVELOPMENT	0.00164204	0.0135741	0.511446	1.84582	0	77	39	GAS6 GPM6B DDR2 COMP OMD CCR1 SRGN AHSG TGFB1 OSR1 P2RX7 MGP ENPP1 S1PR1 ECM1 PTK2B ANO6 ZMPSTE24 FBN2 TMEM119 BMPR2 ASPN HIF1A ROCK1 SMAD3 BMP7 LTF WNT6 TXLNG OSR2 BMPR1B TFAP2A GREM1 NOS3 TWIST1 ISG15 SLC8A1 NOTCH1 GATA1
NEGATIVE_REGULATION_OF_VIRAL_GENOME_REPLICATION	0.00833333	0.0399217	0.511166	1.65223	4	40	23	IFITM2 ISG20 CCL8 IFITM3 RSAD2 ZC3HAV1 RNASEL BST2 IFITM1 OAS3 CCL5 EIF2AK2 FAM111A IFIT1 TNF LTF PLSCR1 HMGA2 PROX1 ISG15 SLPI TRIM6 ZC3H12A
REGULATION_OF_RHO_PROTEIN_SIGNAL_TRANSDUCTION	0.0015456	0.0135741	0.511012	2.01425	0	129	68	APOE HEG1 EPS8 MET LPAR1 ARHGDIA VAV2 F2R PLEKHG1 ARHGEF3 ABCA1 PREX1 ARHGEF28 ARHGDIB F2RL1 APOA1 NET1 DLC1 FGD3 ARRB1 ITSN2 ARHGEF37 ARHGEF19 VAV1 ROBO1 FGD6 PREX2 BCR P2RY10 ARHGEF16 OPHN1 ARHGAP42 GPR65 APOC3 FARP1 ARHGEF12 SPATA13 CDC42SE2 GPR174 NGEF MYOC EPS8L2 LPAR6 SCAI ARHGEF10 ARHGEF18 ITGA3 FGD4 ARHGEF26 MYO9B ITGB1 AKAP13 ARHGEF5 FGD2 F2RL2 ABR ABL2 STMN1 ARHGEF4 GPR35 GPR18 GPR55 AD…
CLATHRIN_DEPENDENT_ENDOCYTOSIS	0.01	0.0454455	0.510117	1.64884	5	40	19	ITGA4 DAB2 GAK AP2B1 PICALM CANX DNAJC6 SCYL2 FNBP1L SH3GL3 PIP5K1C CLTA FCHO1 DNM1 FCHO2 PIK3CB SH3GL2 FCHSD2 CLTC
REGULATION_OF_IMMUNE_EFFECTOR_PROCESS	0.00147059	0.0135741	0.509194	2.21307	0	319	148	CFH PTPRJ C3 C2 PROS1 SERPING1 CFB B2M TRIM44 ANXA1 C1S C1QB ITGAM FCER1G IL1R1 TNFRSF1B C6 IRF4 GRN LYN C1QA RNF125 C1QC PTAFR DHX9 FCGR2B C3AR1 ENPP3 TLR4 DNASE1L3 C4B RSAD2 GAB2 ITGB2 CD74 TGFB1 CD300A LGALS9 C7 SASH3 LGALS3 DTX3L HPX F2RL1 PYCARD SYK APOA1 P2RX7 IRAK3 TLR9 RAC2 TNFAIP3 ADORA2B SPINK5 BST2 PTPRC TMEM173 STXBP2 DDX58 TLR3 LBP CFP PTPN6 STXBP1 CD84 GPRC5B CEACAM1 BTK SLAMF8 FGR …
SODIUM_ION_HOMEOSTASIS	0.00991736	0.0454455	0.508945	1.65911	5	41	19	SCN7A ATP1A3 C7 GNAI2 AVPR1A SCNN1A ATP1B3 ATP1A1 EDN1 EDNRB UPK3A AGT ATP1A4 SLC9A1 NPR1 ATP6V1B1 ADORA2A TFAP2B SLC8A1
NEGATIVE_REGULATION_OF_IMMUNE_RESPONSE	0.00158479	0.0135741	0.508759	1.96927	0	117	55	PPARG SERPING1 ANXA1 GRN LYN FCGR2B ENPP3 TGFB1 CD300A INPP5D LGALS9 PARP14 LGALS3 APOA1 IRAK3 ALOX15 NLRC5 TNFAIP3 SPINK5 BST2 PTPRC SAMHD1 SAMSN1 PTPN6 CD84 CEACAM1 SLAMF8 TNFRSF14 BCR AMBP IL7R APOA2 VSIG4 IL13RA2 IL2RA IL33 LOXL3 SERPINB9 HMOX1 HAVCR2 MMP12 ARG1 NMI TNF IL1RL1 TYRO3 CCR2 DCST1 IL27RA STAT6 CD96 A2M PGLYRP2 OTOP1 DHX58
REGULATION_OF_TUMOR_NECROSIS_FACTOR_MEDIATED_SIGNALING_PATHWAY	0.00330579	0.0202312	0.508669	1.71183	1	48	29	GAS6 RIPK1 TNFRSF1A ADIPOQ CCDC3 CASP8 F2RL1 PYCARD SYK APOA1 CASP1 TNFAIP3 CASP4 PELI3 HIPK1 TNF TRAF1 SPHK1 CPNE1 HSPA1B ADAM17 NR1H4 RBCK1 BIRC3 MADD CYLD SPATA2 CLIP3 TRAIP
REGULATION_OF_PRODUCTION_OF_MOLECULAR_MEDIATOR_OF_IMMUNE_RESPONSE	0.0015748	0.0135741	0.508667	1.97267	0	118	55	B2M FCER1G IL1R1 TNFRSF1B FCGR2B TLR4 RSAD2 CD74 TGFB1 SASH3 HPX F2RL1 APOA1 IRAK3 TLR9 SPINK5 BST2 PTPRC DDX58 TLR3 GPRC5B BTK KLK7 MAPK3 TNFRSF14 MSH6 RBP4 HK1 APOA2 IL13RA2 CD36 IL33 HMOX1 ARG1 TNF IL18R1 MALT1 CCR2 DDX21 CD40 NR4A3 IL27RA STAT6 CD226 CD96 IL18 FFAR2 PRKCZ GATA3 CD22 MZB1 TRAF6 TRIL SEMA7A TBX21
RESPONSE_TO_FATTY_ACID	0.00161812	0.0135741	0.508666	1.83293	0	74	44	SFRP1 PPARG UCP2 AACS AKT1 GNG2 CLDN1 ACACA TNC CPT1A GNB1 PTAFR PID1 ADIPOQ ACSL1 PTGFR APOB PON1 CAT CREB1 EDN1 PTGER2 UCP1 E2F1 CD36 PDK3 CPS1 PPARGC1A CCNB1 GLDC TGFBR3 LDLR SRC CDK4 FFAR2 TLR2 CCL19 P2RY6 PTGER4 SMARCD1 DGAT2 NR1H4 PRKAA1 YY1
CELL_CELL_JUNCTION_ORGANIZATION	0.00155763	0.0135741	0.50852	2.014	0	140	69	ACTN4 DSP CDH11 HEG1 CLDN3 CTNNA1 CLDN1 PRKCI CXADR CAV1 ACE CSF1R MYO1C PERP CD9 F2R CDH19 CDH1 TGFB1 PKP1 POF1B DSG2 F2RL1 PARD6G STRN PKP3 PKP4 TRPV4 MICALL2 PDCD6IP GRHL1 CAMSAP3 RHOA CDH3 GRHL2 GJA1 ROCK1 APC CTNND1 RUNX1 SMAD3 DLG5 LSR TNF TJP1 MPP7 KIFC3 GJA5 F11R MARVELD2 PLEKHA7 CD177 CDHR3 AGT GJB2 WDR1 PRKCH MARVELD3 CTNND2 CDH2 PARD6B OCLN CRB3 CDH9 CDH22 SDK2 PKP2 PTPRO NR1H4
LYMPHOCYTE_ACTIVATION_INVOLVED_IN_IMMUNE_RESPONSE	0.00156495	0.0135741	0.507712	2.00645	0	139	65	DOCK11 ANXA1 FCER1G SEMA4A IRF4 APBB1IP FCGR2B TLR4 CD180 SWAP70 PLCG2 TGFB1 DOCK10 LGALS9 LCP1 LGALS3 SLC11A1 F2RL1 ATP7A MFNG PSEN1 PTPRC LY9 SPN CEACAM1 PTK2B MSH6 NOTCH2 STAT3 CD86 BCL3 ICAM1 GPR183 LOXL3 LFNG ADA HAVCR2 AP1G1 SLAMF6 IL18R1 RORA MALT1 EOMES CD40 CORO1A ITGAL IL27RA STAT6 PGLYRP2 CCR6 IL18 NFKBID PRKCZ CLEC4E GATA3 FOXP1 IL12RB1 CCL19 MYB TBX21 BATF RAB27A PTGER4 ZFPM1 CD19
ICOSANOID_METABOLIC_PROCESS	0.00328407	0.0202312	0.507679	1.74303	1	56	23	PTGIS CYP1B1 MGLL TNFRSF1A PLA2G4A ABCC1 DPEP1 TBXAS1 ALOX5AP LTC4S HPGD ALOX15 ALOX5 HPGDS FAAH MAPK3 PON1 CYP2S1 PTGS1 PTGES CYP2E1 AWAT1 GGT1
NEGATIVE_REGULATION_OF_LEUKOCYTE_CELL_CELL_ADHESION	0.0015873	0.0135741	0.507662	1.94426	0	106	62	ANXA1 AKT1 GPNMB TWSG1 PLA2G2D FCGR2B PDE5A CD74 ADTRP TGFB1 CD300A PTPN22 DTX1 LGALS9 LGALS3 PAG1 TNFAIP8L2 PTPN6 SPN CASP3 CEACAM1 TNFRSF14 GLI3 CD274 RUNX3 VTCN1 LAG3 VSIG4 CXCL12 CD86 IL2RA LOXL3 PLA2G2F HAVCR2 RUNX1 ARG1 DLG5 ITCH IRF1 SOCS1 IHH NFKBID IDO1 PAWR ARG2 KLF4 PDCD1LG2 SDC4 TIGIT TBX21 IL20RB ADORA2A TNFRSF21 MAD1L1 CCL28 SOCS6 LAX1 CTLA4 ZC3H12A FOXJ1 WNK1 CD80
MATERNAL_PROCESS_INVOLVED_IN_FEMALE_PREGNANCY	0.00328407	0.0202312	0.50732	1.7418	1	56	25	PTGIS AKT1 RGS2 ESR1 CTSB PAM LGALS9 DSG2 VDR ANGPT2 PGR ADCY7 JUNB MAPK3 STC1 MEN1 BMPR2 TCF23 HAVCR2 ARG1 CNR1 ITGA3 IHH GJB2 PRDM1
POSITIVE_REGULATION_OF_LEUKOCYTE_CHEMOTAXIS	0.00162338	0.0135741	0.507281	1.82929	0	75	36	GAS6 RARRES2 NCKAP1L CCR1 CAMK1D STK39 THBS4 ADAM10 C3AR1 SWAP70 CD74 LGMN THBS1 LGALS9 F2RL1 RAC2 LBP CSF1 MAPK3 TRPV4 PTK2B MOSPD2 CCL5 CALR ANO6 EDN1 S100A14 CXCL12 C5AR1 CCR2 CMKLR1 CCL7 EDN3 FPR2 CCR6 CXCR2
DIGESTIVE_SYSTEM_PROCESS	0.00160514	0.0135741	0.507267	1.85341	0	80	27	LIMA1 ACO1 STK39 EZR TLR4 OXTR PTGER3 TJP2 APOA1 SNX10 VDR TLR9 MUC4 TIFAB FABP1 KCNQ1 SLC2A5 RBP4 SLC46A1 APOA2 COPA PLS1 CD36 FGF10 HRH2 F11R LDLR
VASCULAR_PROCESS_IN_CIRCULATORY_SYSTEM	0.0015748	0.0135741	0.50712	2.01156	0	144	74	APOE PTPRJ PIK3C2A COMP AKT1 RGS2 CAV1 ACE F2R PTAFR DOCK5 SCPEP1 OXTR ITGA1 ACTA2 TGFB1 EGFR F2RL1 PTPRM ADORA2B ADM AVPR1A HMGCR SLC6A4 FGB GCLC FGA CD38 CEACAM1 TRPV4 EDNRA KCNMB1 KNG1 FGG EDN1 EDNRB BCR ARHGAP42 APLN SLIT2 BMPR2 BBS2 RHOA ICAM1 KCNMB4 ROCK1 PDE3A HMOX1 CPS1 ECE1 CASR HRH2 TEK GJA5 EDN3 EPHX2 SRC CXCR2 ADRA2C SERPINF2 AGT ADRB3 NOS3 ABR PLOD3 NPR1 ASIC2 BDKRB2 GPX1 GCH1 ADORA2…
REGULATION_OF_CELL_CELL_ADHESION	0.001443	0.0135741	0.506813	2.22128	0	345	165	TGFBR2 IL1RL2 EPCAM CD44 ITGA6 ANXA1 IL6ST DPP4 AKT1 GPNMB NCKAP1L IGF1 CAV1 MBP LYN ITGA4 CD9 TWSG1 GCNT2 FYN PTAFR PLA2G2D FCGR2B CDH1 SWAP70 FERMT3 PDE5A CD74 ADTRP TGFB1 ADIPOQ SIRPA CARD11 CD300A TNFRSF13C PTPN22 DTX1 LGALS9 SASH3 VCAM1 LGALS3 CDSN PYCARD SYK APOA1 CD83 ALOX15 PTPRC PAG1 CX3CL1 ABAT C1QTNF1 CSK TNFAIP8L2 PDPN FGB PLG FGA PTPN6 MYADM PAK2 SPN FXYD5 PNP ADAM8 CASP3 CEACAM1 TRP…
CELL_CELL_ADHESION	0.0013459	0.0135741	0.506788	2.34568	0	732	357	CSRP1 DSP COL14A1 NEGR1 TGFBR2 KIT GAS6 CDH11 MSN LAMB1 IL1RL2 PDGFRA PARVA EMB CLDN3 EPCAM CD44 ITGA6 PCDHGC3 ANXA1 IL6ST COMP CTNNA1 CYP1B1 DPP4 AKT1 CLIC1 ALCAM GPNMB NCKAP1L ITGAM GCNT1 CLDN1 IGF1 FNDC3A CXADR CAV1 PTPRF MBP MPZL2 PECAM1 LYN ITGA4 PCDH7 PERP PTPRD NT5E TMOD3 CD9 TWSG1 THBS4 GCNT2 FYN CADM3 PTAFR SIGLEC1 PIK3CG TRIM29 ITGA8 PLA2G2D CDH19 SELPLG NTN1 FCGR2B CDH1 EZR SELP SWAP70…
CELL_CELL_ADHESION_VIA_PLASMA_MEMBRANE_ADHESION_MOLECULES	0.00150602	0.0135741	0.506317	2.14275	0	242	119	TGFBR2 CDH11 EMB CLDN3 EPCAM PCDHGC3 ALCAM ITGAM CLDN1 CXADR PTPRF MBP MPZL2 PECAM1 PCDH7 PTPRD CADM3 CDH19 CDH1 SELP ITGB2 ADIPOQ CELSR1 PLXNB2 VCAM1 DSG2 PTPRM CLDN10 APOA1 FAT1 CLDN7 CLSTN1 IL1RAP CX3CL1 CLDN4 CD84 AMIGO2 MYADM DSC3 FXYD5 CEACAM1 SCARF2 DSC1 CLSTN3 PCDH17 ROBO1 CLDN8 SPARCL1 SELL CLDN22 NTNG1 ICAM1 PCDHB9 CDH3 EFNA5 IL1RN TENM4 CD6 CLDN2 RET PCDHB11 HMCN1 ITGAL DAB1 FGFRL1 IGS…
REGULATION_OF_GLUCOSE_TRANSMEMBRANE_TRANSPORT	0.00165017	0.0135741	0.506121	1.76487	0	61	26	C3 GPC3 AKT1 IGF1 PRKCI PRKCB PID1 ADIPOQ RNASEL FABP5 MEF2A ENPP1 ADIPOR2 EDNRA FFAR4 SORBS1 EDN1 IRS2 BRAF GRB10 PTPN11 TNF NFE2L2 SLC2A1 NR4A3 PRKAG2
CERAMIDE_BIOSYNTHETIC_PROCESS	0.00332226	0.0202312	0.506091	1.72415	1	54	26	SGMS2 ASAH1 ASAH2 TNFRSF1A SPTLC2 ST8SIA6 SMPD3 CERS6 ORMDL3 P2RX7 B4GALT6 B3GALT2 CERS5 FA2H B4GALNT1 CERS2 DEGS1 TNF SGMS1 SPTLC1 UGCG CERS4 GBA ST8SIA4 ST6GALNAC3 PRKAA1
POSITIVE_REGULATION_OF_PROTEIN_KINASE_B_SIGNALING	0.00156006	0.0135741	0.505462	2.01699	0	148	74	AXL PTPRJ NOX4 KIT GAS6 PDGFRA ESR1 MET PIK3AP1 GCNT2 FYN P2RX4 PIK3CG KLB HPSE TGFA TGFB1 THBS1 SEMA5A EGFR PIK3R5 HCLS1 CHI3L1 RAC2 CX3CL1 HGF C1QTNF1 FGFR2 MFHAS1 BAG4 ADAM8 BTC VAV1 NRG4 P2RY12 IRS2 ERBB3 CD86 FGF10 MST1R IGFBP5 STK3 F3 LCK PTPN11 MYOC TNF AREG RET TEK FAM110C FGF7 FGFR3 ENG ERBB4 NRG2 SRC IGF2 IL18 CPNE1 ITGB1 GATA3 F10 HSP90AA1 FRS2 CX3CR1 FGF2 PIK3CB TNFAIP8L3 CCL19 CD19 G…
REGULATION_OF_STEM_CELL_PROLIFERATION	0.00332779	0.0202312	0.505412	1.72734	1	55	25	FBLN1 EPCAM CTNNA1 ACE SMO TGFB1 PTPRC CX3CL1 LRRK2 ZFP36L1 ATXN1L GLI3 FZD3 FERMT1 EIF2AK2 HIF1A HMGB2 CITED1 CX3CR1 KCTD11 HMGA2 ASPM SOX17 NOTCH1 VEGFC
REGULATION_OF_PEPTIDYL_TYROSINE_PHOSPHORYLATION	0.00153139	0.0135741	0.504641	2.11872	0	221	96	SFRP1 PTPRJ NOX4 KIT GAS6 CD44 IL6ST SFRP2 PDGFC IQGAP1 NCF1 IGF1 APP CAV1 NTRK2 TNFRSF1A ACE PECAM1 LYN CSF1R ENPP2 THBS4 FYN TGFA ITGB2 CD74 TGFB1 ADIPOQ CD300A BST1 EGFR PARP14 HPX SYK HCLS1 RAP2B PSEN1 PTPRC CBL HGF LRRK1 RELN SAMSN1 PTPN6 PAK2 GPRC5B TAL1 PARP9 PTK2B THY1 EHD4 NCAPG2 STAP1 AFAP1L2 TNFRSF14 CCL5 BANK1 SHC1 JAK2 IL7 STAT3 ERBB3 ABI1 CD36 FGF10 ICAM1 CD4 FLT3 SOCS3 ERRFI1 EFNA5…
NEGATIVE_REGULATION_OF_INFLAMMATORY_RESPONSE	0.00158479	0.0135741	0.504562	1.95302	0	117	46	APOE PPARG PTGIS IGF1 TNFRSF1B TNFRSF1A GRN ABCD2 NT5E SERPINF1 APOD FCGR2B ENPP3 ADIPOQ SIRPA ACP5 PYCARD APOA1 TNFAIP3 RB1 PTPRC CX3CL1 HGF TNFAIP8L2 MFHAS1 PDCD4 ADCY7 SLAMF8 KRT1 CALCRL C1QTNF3 FFAR4 CD200R1 IL1R2 BCR IL2RA NFKB1 SOCS3 PBK ADA SMAD3 RORA TYRO3 F2 CNR2 TEK
LYMPHOCYTE_APOPTOTIC_PROCESS	0.00162075	0.0135741	0.504342	1.76684	0	62	32	AKT1 RIPK1 LYN CD74 PRELID1 LGALS9 LGALS3 P2RX7 ADAM8 BTK GLI3 CCL5 CD274 IRS2 DOCK8 IL7R IL2RA HIF1A ADA RIPK3 BCL2L11 SLC39A10 CD3G PDCD1 PTEN NFKBID BLM IDO1 AURKB CD27 ARG2 FOXP1
NEURAL_TUBE_FORMATION	0.00158479	0.0135741	0.504027	1.91085	0	101	44	SFRP1 SFRP2 FZD1 LUZP1 ST14 PTK7 CFL1 ZEB2 SOX4 TGFB1 CELSR1 PLXNB2 ADM DLC1 SHROOM3 FZD3 SPINT1 MTHFD1L SPINT2 APAF1 LRP6 STK4 GRHL2 FZD6 HIF1A PTCH1 STK3 GDF7 PAX2 VANGL2 BMP7 KIF20B SETD2 LRP2 KDM2B BMP5 SKI FZD2 IFT122 TWIST1 SUFU TRAF6 SDC4 PRICKLE1
NEGATIVE_REGULATION_OF_CELL_CELL_ADHESION	0.00154083	0.0135741	0.503996	2.02164	0	150	59	EPCAM ANXA1 AKT1 GPNMB MBP CD9 TWSG1 PLA2G2D FCGR2B CDH1 SWAP70 PDE5A CD74 ADTRP TGFB1 ADIPOQ CD300A PTPN22 DTX1 LGALS9 LGALS3 CDSN APOA1 PAG1 ABAT C1QTNF1 TNFAIP8L2 PLG PTPN6 MYADM SPN FXYD5 CASP3 CEACAM1 TRPV4 TNFRSF14 GLI3 CD274 FGG RUNX3 VTCN1 JAK2 PPM1F SPINT2 LAG3 VSIG4 CXCL12 CD86 IL2RA LOXL3 PLA2G2F IL1RN UBASH3B HAVCR2 RUNX1 ARG1 DLG5 ITCH IRF1
CELL_JUNCTION_ORGANIZATION	0.00149477	0.0135741	0.503732	2.15213	0	265	133	SFRP1 ACTN4 DSP PTPRJ CDH11 GPM6B MAP4K4 HEG1 CLDN3 ITGA6 ACTN1 CTNNA1 RAB8B IQGAP1 KRT14 CLDN1 PRKCI CXADR CAV1 ACE CSF1R MYO1C PERP MMP14 CD9 F2R CADM3 CDH19 APOD RAP1B CDH1 TGFB1 PKP1 THBS1 FBLIM1 POF1B DSG2 F2RL1 PARD6G STRN CAPZA1 CORO1C ADD1 MYO9A DLC1 CSK PKP3 PKP4 COL17A1 ACTG1 TRPV4 FAM107A PTK2B THY1 MICALL2 PDCD6IP LAMC2 ITGA2 SORBS1 KRT5 FN1 GRHL1 ITGB4 TRIP6 PPM1F OPHN1 CAMSAP3 ACVRL…
POSITIVE_REGULATION_OF_CHEMOTAXIS	0.00155763	0.0135741	0.503726	1.95969	0	119	54	GAS6 RARRES2 NCKAP1L CCR1 MET LPAR1 CAMK1D STK39 THBS4 P2RX4 ADAM10 C3AR1 SWAP70 CD74 TGFB1 LGMN THBS1 LGALS9 SEMA5A F2RL1 RAC2 LBP S1PR1 CSF1 MAPK3 TRPV4 PTK2B MOSPD2 ITGA2 CCL5 P2RY12 CALR ANO6 EDN1 S100A14 PPM1F CXCL12 TUBB2B SLIT2 BMPR2 C5AR1 FGF10 F3 PDGFD SMAD3 CASR CCR2 TREM2 CMKLR1 CCL7 EDN3 FPR2 CCR6 CXCR2
REGULATION_OF_ALCOHOL_BIOSYNTHETIC_PROCESS	0.00164204	0.0135741	0.502931	1.78162	0	69	31	APOE POR ACACA ADCYAP1R1 PTAFR SP1 SQLE VDR SREBF2 HMGCR ELOVL6 APOB FASN PTK2B ERLIN2 PLEK ABCG1 NFKB1 KPNB1 MBTPS1 NFYA SCAP ERLIN1 TNF GFI1 SEC14L2 BMP5 PTH1R IDI1 P2RY6 LSS
B_CELL_ACTIVATION	0.00153139	0.0135741	0.502753	2.09785	0	206	79	SFRP1 PTPRJ KIT DOCK11 NCKAP1L TYROBP LYN ITGA4 MMP14 FCGR2B PRKCB TLR4 CD180 SWAP70 MNDA PLCG2 CD74 TGFB1 CARD11 DOCK10 CD300A TNFRSF13C NFAM1 INPP5D BST1 CASP8 SASH3 VCAM1 SYK MFNG TLR9 ZFP36L2 IKZF3 TNFAIP3 BST2 PTPRC AHR ATM TXLNA SAMSN1 PTPN6 KLF6 CD38 FCRL1 CASP3 BTK SLAMF8 MS4A1 RBPJ PTK2B ATP11C TNFSF13B ID2 ZFP36L1 MSH6 IRS2 BANK1 IL7R NOTCH2 IL7 CXCR5 BCL2 BCL3 FLT3 GPR183 LFNG CD81 CD7…
REGULATION_OF_CELL_SHAPE	0.0015625	0.0135741	0.502513	1.98414	0	136	67	KIT RHOJ MSN PARVA ANXA1 EPS8 SEMA4A SYNE3 LPAR1 CSF1R FYN EZR ATP10A ITGB2 PLXNA4 GNA13 PRPF40A FBLIM1 HCK GNA12 PLXNB2 CYFIP1 DLC1 SHROOM3 PDPN PLXNC1 HEXB FGR SEMA3E FGD3 PLXNB1 PTK2B CDC42EP4 FGD6 MYH10 FN1 PLXNA2 ZMPSTE24 BAMBI PTN RHOA ICAM1 COCH PLXNA1 LST1 S100B CDC42SE2 WASF3 ARAP1 F2 BAIAP2 CCL2 ARHGAP15 CORO1A CCL7 MYH9 ARHGEF18 SLC9A3R1 FGD4 WDR1 PALM2 FES FGD2 BRWD3 CDC42EP5 PALMD SP…
RESPONSE_TO_MOLECULE_OF_BACTERIAL_ORIGIN	0.00149477	0.0135741	0.50228	2.16361	0	292	134	DCN AXL CXCL9 CD68 MRC1 CSF2RB B2M AKT1 CLDN1 CCR5 LITAF TNFRSF1B LYN F2R PTAFR FCGR2B SELP TLR4 CD180 LY86 C4B PENK VIM ABCA1 PLCG2 IRF5 GNG12 TGFB1 SIRPA ACP5 PTPN22 LGALS9 HCK PTGFR CASP8 VCAM1 SLC11A1 PYCARD PCK1 CASP1 P2RX7 IRAK3 TICAM2 HPGD RPS6KA3 TLR9 TNFAIP3 CD14 FMO1 LCN2 ADM CX3CL1 TFPI LBP FGFR2 MGST1 PDCD4 IRAK2 APOB JUNB CASP3 IL10RA PF4 MAPK3 STAP1 CCL5 CD274 CMPK2 KMO SBNO2 EDN1 P…
REGULATION_OF_TUBE_SIZE	0.00155039	0.0135741	0.502057	1.96633	0	123	63	APOE PIK3C2A COMP AKT1 RGS2 CAV1 ACE F2R PTAFR DOCK5 SCPEP1 OXTR ITGA1 ACTA2 EGFR F2RL1 PTPRM ADORA2B ADM AVPR1A HMGCR SLC6A4 FGB GCLC FGA CD38 EDNRA KCNMB1 KNG1 FGG EDN1 EDNRB ARHGAP42 APLN BMPR2 BBS2 RHOA ICAM1 KCNMB4 ROCK1 HMOX1 CPS1 ECE1 CASR HRH2 GJA5 EDN3 EPHX2 ADRA2C SERPINF2 AGT ADRB3 NOS3 PLOD3 NPR1 ASIC2 BDKRB2 GPX1 GCH1 ADORA2A ADRA1A SLC8A1 FOXC1
MORPHOGENESIS_OF_A_BRANCHING_STRUCTURE	0.00155039	0.0135741	0.501774	2.0804	0	187	85	CLIC4 NTN4 SFRP1 TGFBR2 MAGED1 SFRP2 GPC3 CTSH ST14 ESR1 MET TNC MMP14 SULF1 SEMA3A PKD2 SMO TACSTD2 TGFB1 TGM2 GNA13 PBX1 CELSR1 VDR ADM WT1 SHOX2 HGF LRRK2 FGFR2 PGR CSF1 SEMA3E EDNRA MYC GLI3 RSPO3 EDN1 SPINT1 SPINT2 WNT2B WNT2 BCL11A LRP6 BCL2 SLIT2 STK4 FGF10 ESRP2 GRHL2 SOCS3 PTCH1 SEMA3C PLXNA1 GDF7 BTBD7 SALL1 DLG5 TNF PAX2 VANGL2 AREG CASR BMP7 WNT6 KRAS TCF21 MSX2 PML CTSZ SETD2 FGF7 HO…
REGULATION_OF_CHEMOTAXIS	0.00155039	0.0135741	0.501613	2.07973	0	187	93	GAS6 PDGFRA SEMA3D RARRES2 NCKAP1L CCR1 MET SEMA4A LPAR1 CAMK1D NBL1 LYN STK39 SEMA3F THBS4 P2RX4 SEMA3A ADAM10 C3AR1 SWAP70 CD74 TGFB1 LGMN PLXNA4 THBS1 LGALS9 CORO1B BST1 SEMA5A F2RL1 ANGPT2 RAC2 LBP S1PR1 CSF1 SLAMF8 SEMA3E MAPK3 TRPV4 PTK2B STAP1 MOSPD2 ITGA2 SEMA3G CCL5 ROBO1 P2RY12 CALR ANO6 EDN1 SEMA4B S100A14 PPM1F KLRK1 CXCL12 ZSWIM6 TUBB2B SLIT2 BMPR2 C5AR1 FGF10 GPR183 SEMA3C F3 PDGFD …
ODONTOGENESIS	0.00156986	0.0135741	0.50152	1.93448	0	112	45	MYO5A LAMB1 PDGFRA ITGA6 CTNNA1 TNC PAM PERP SMPD3 SMO TGFB1 OSR1 CD34 SNX10 ADM FGFR2 CSF1 SDC1 EDA GLI3 EDN1 ITGB4 BCL11B LRP6 HAND2 RHOA FGF10 ASPN HDAC1 SOSTDC1 BCL2L11 BMP7 WNT6 TUFT1 MSX2 TNFRSF11B AQP3 OSR2 SCN5A ATF2 TFAP2A CSF3R HTRA1 TWIST1 TRAF6
BIOLOGICAL_ADHESION	0.00126904	0.0135741	0.501496	2.38439	0	1256	612	MMRN1 LYVE1 CSRP1 TGFBI SFRP1 AXL ACTN4 DSP COL14A1 NEGR1 FBLN1 PTPRJ TGFBR2 KIT GAS6 FLRT2 CDH11 GPM6B DDR2 MSN LAMB1 IL1RL2 PDGFRA MAP4K4 PARVA EMB TINAGL1 MERTK HSD17B12 CLDN3 EPCAM CD44 ITGA6 PCDHGC3 ACTN1 ANXA1 IL6ST SFRP2 COMP COL12A1 CTNNA1 ENTPD1 CYP1B1 OMD POSTN DPP4 AKT1 IQGAP1 CLIC1 ANTXR1 ALCAM GPNMB ITGBL1 NCKAP1L ABI3BP ITGAM GCNT1 CLDN1 IGF1 CCR1 FNDC3A APP CXADR PRKX CAV1 LGALS3BP…
RECEPTOR_SIGNALING_PATHWAY_VIA_STAT	0.0015748	0.0135741	0.501291	1.94407	0	118	50	KIT SH2B2 IL6ST CYP1B1 IGF1 CAV1 TNFRSF1A PECAM1 LYN CSF1R F2R FYN PRLR PKD2 CD300A PARP14 IFNAR2 HPX HCLS1 PTPRC MGAT5 IL10RA PARP9 PTK2B STAT1 LEPROT CCL5 IL7R JAK2 STAT3 STAT4 IL10RB BCL3 FLT3 SOCS3 NMI TNF F2 CCR2 RET CCL2 CD40 SOCS1 DAB1 FGFR3 ERBB4 GHR IL18 AGT CRLF2
REGULATION_OF_RECEPTOR_SIGNALING_PATHWAY_VIA_STAT	0.00158479	0.0135741	0.501252	1.90032	0	101	43	KIT SH2B2 IL6ST CYP1B1 IGF1 CAV1 TNFRSF1A PECAM1 LYN CSF1R F2R FYN PRLR CD300A PARP14 HPX HCLS1 PTPRC MGAT5 IL10RA PARP9 PTK2B LEPROT CCL5 IL7R JAK2 STAT3 IL10RB BCL3 FLT3 SOCS3 TNF F2 RET CD40 SOCS1 DAB1 FGFR3 ERBB4 GHR IL18 AGT CRLF2
SECONDARY_ALCOHOL_METABOLIC_PROCESS	0.00161812	0.0135741	0.501219	1.81496	0	78	40	APOC1 APOE LIMA1 LEPR TTC39B APP LIPE SOAT1 NPC2 ABCA1 APOBR APOA1 SQLE CEBPA SREBF2 APOB PON1 CAT OSBPL5 ERLIN2 APOA2 ABCG1 MBTPS1 SCAP ERLIN1 LDLR CYP11A1 EPHX2 APOF GBA SERPINA12 CH25H CYP7B1 LDLRAP1 NSDHL CLN6 DGAT2 LIPC NR1H4 ANGPTL3
POSITIVE_REGULATION_OF_EPITHELIAL_TO_MESENCHYMAL_TRANSITION	0.00660066	0.0333622	0.501054	1.65816	3	44	26	TGFBR2 GCNT2 DAB2 TGFB1 LOXL2 PDPN WWTR1 TGFB1I1 GLIPR2 BAMBI SDCBP OLFM1 SMAD3 BMP7 ENG TWIST1 CRB2 NOTCH1 FOXC1 SNAI1 TGFBR1 SMAD4 TIAM1 SMAD2 LEF1 BMP2
LAMELLIPODIUM_ORGANIZATION	0.00162338	0.0135741	0.500878	1.8062	0	75	32	KIT CD44 NCKAP1 VAV2 ENPP2 CORO1B ATP7A CYFIP1 ARPC5 RAC2 CORO1C SNX1 S1PR1 PDPN SNX2 TWF1 CCDC88A WAS P2RY12 SRGAP2 WASF2 SLIT2 ABI1 SPATA13 WASF3 CTTN HDAC4 AUTS2 SRC ITGB1 ABLIM1 HRG
MYELOID_LEUKOCYTE_MEDIATED_IMMUNITY	0.00140845	0.0135741	0.500633	2.25038	0	473	204	FGL2 MME CYBB DSP TIMP2 CD68 PTPRJ EEF1A1 ARSB C3 KIT GNS GM2A CD44 B2M VAT1 PYGB IQGAP1 PGRMC1 ASAH1 CTSH NCKAP1L ITGAM CTSC IQGAP2 CMTM6 CTSB FCER1G PLAC8 TNFRSF1B GRN ACE PECAM1 TYROBP LYN RAB31 CD33 ACPP NPC2 ACLY CAP1 QPCT COTL1 PIGR SLC27A2 PTAFR PIK3CG ANPEP PYGL ADAM10 RAP1B LRMP AHSG HPSE FCGR2B CTSS C3AR1 PLEKHO2 DGAT1 DNASE1L3 HEBP2 GAB2 MNDA ITGB2 SIRPA PKP1 CPLX2 PRCP CD300A NFAM1 LG…
MOLTING_CYCLE	0.00158479	0.0135741	0.500627	1.91064	0	104	35	MYO5A CD109 KRT17 KRT14 KRT71 HPSE SMO EGFR CELSR1 ATP7A SPINK5 FGFR2 RBPJ NIPBL EDA LDB2 FA2H FZD3 ZMPSTE24 FERMT1 BCL2 FGF10 CDH3 FZD6 IGFBP5 APCDD1 HDAC1 SOSTDC1 TNF VANGL2 TNFRSF19 MYSM1 MSX2 KRT25 FGF7
NEGATIVE_REGULATION_OF_ENDOCYTOSIS	0.00996678	0.0454455	0.50049	1.60906	5	39	19	APOC1 MCTP1 CAV1 CD300A LGALS3 ANKRD13A PICALM SCAMP5 APOC3 SDCBP EPHA3 SH3GL3 STX1B MTMR2 ARF6 PACSIN2 PRKD1 APOC2 PROM2
HUMORAL_IMMUNE_RESPONSE	0.00151745	0.0135741	0.500449	2.03183	0	163	75	CFH CXCL9 C3 C2 PROS1 SERPING1 CFB SCARA3 C1S C1QB RARRES2 C6 C1QA C1QC FCGR2B C3AR1 C4B MASP1 C1RL C7 BST1 SLC11A1 HPX ATP7A CD83 SPINK5 BST2 LCN2 PTPRC CFD CFP ST6GAL1 FGB FGA PTPN6 KRT1 MS4A1 KLK7 PF4 RBPJ IL7 VSIG4 BCL2 C5AR1 BCL3 PAX5 GPR183 CD81 CFI TNF F2 CCR2 CPN2 CCL2 LTF TREM2 A2M PGLYRP2 PDCD1 CCR6 GATA3 HRG POU2F2 EBI3 POU2AF1 CD19 KRT6A CLU S100A8 MBL2 TFE3 TRAF3IP2 SLPI NOTCH1 TNFRS…
STEROL_METABOLIC_PROCESS	0.00159236	0.0135741	0.500337	1.84601	0	85	42	APOC1 APOE LIMA1 LEPR TTC39B CYP1B1 LIPA APP LIPE SOAT1 NPC2 ABCA1 APOBR APOA1 SQLE CEBPA SREBF2 APOB PON1 CAT OSBPL5 ERLIN2 APOA2 ABCG1 MBTPS1 SCAP ERLIN1 LDLR CYP11A1 EPHX2 APOF GBA SERPINA12 CH25H CYP7B1 LDLRAP1 NSDHL CLN6 DGAT2 LIPC NR1H4 ANGPTL3
RESPONSE_TO_ALCOHOL	0.00153139	0.0135741	0.500234	2.08516	0	203	95	CYBB SFRP1 TGFBR2 PPARG CCND1 CLDN3 AACS CTNNA1 ADCY3 SLIT3 AKT1 RGS2 GNG2 EPS8 CLDN1 ACACA CCR5 TNC GNB1 ADCYAP1R1 CDO1 FYN CDH1 PENK ABCA1 SMO ADAM15 TGFB1 ADIPOQ XRN1 IGFBP7 PTGFR GSN CASP8 VCAM1 HPGD CD14 CBL AHR AVPR1A HMGCR ABAT FGFR2 ADCY7 GLB1 APOBEC1 ADH7 MAP4K1 EIF4EBP1 PTK2B KCNMB1 CAT RBP4 PTGER2 TYMS STAT3 CYBA LRP6 SLIT2 RHOA ICAM1 EFNA5 CYP2E1 GNAI1 PTCH1 SDF4 FOXO3 FOSB BRCA1 ADCY…
EXTRINSIC_APOPTOTIC_SIGNALING_PATHWAY_VIA_DEATH_DOMAIN_RECEPTORS	0.00160514	0.0135741	0.499694	1.79863	0	72	37	SFRP1 SORT1 SFRP2 RIPK1 TNFRSF1A TIMP3 THBS1 CASP8 LGALS3 TNFAIP3 HGF FGB FGA DAPK1 FGG CASP8AP2 BCL2 STK4 BID ICAM1 CFLAR STK3 HMOX1 SKIL HMGB2 TNF MAL BRCA1 BCL2L1 PMAIP1 PTEN BMP5 BMPR1B ATF3 SP100 TNFSF10 NOS3
LYMPHOCYTE_MEDIATED_IMMUNITY	0.00156986	0.0135741	0.499663	2.07022	0	191	84	C3 C2 SERPING1 B2M TLR8 C1S C1QB CTSH CTSC FCER1G IL1R1 TNFRSF1B C6 C1QA C1QC FCGR2B C4B RSAD2 SWAP70 CD74 TGFB1 C1RL IRF7 INPP5D LGALS9 C7 SASH3 SLC11A1 EMP2 SLAMF7 HPX P2RX7 PTPRC PTPN6 CEACAM1 BTK VAV1 MSH6 WAS IL7R GZMB KLRK1 LAG3 IL13RA2 PRF1 BCL3 ICAM1 CD81 SERPINB9 RASGRP1 HAVCR2 CFI ARG1 AP1G1 SLAMF6 RIPK3 TNF IL18R1 MALT1 CCR2 CD8A CD40 CORO1A MYO1G IL27RA STAT6 LYST CD226 CD96 CCR6 IL18…
POSITIVE_REGULATION_OF_MYELOID_LEUKOCYTE_DIFFERENTIATION	0.00493421	0.0270265	0.499557	1.68833	2	49	18	CCR1 RIPK1 TYROBP CD74 TGFB1 CASP8 HCLS1 RB1 CSF1 PF4 ID2 ZFP36L1 CREB1 EVI2B CD4 RUNX1 ROR2 TNF
REGULATION_OF_BLOOD_PRESSURE	0.0015674	0.0135741	0.499504	1.98852	0	147	56	MME PPARG GAS6 POSTN ACSM3 ENPEP ACE STK39 F2R CMA1 PTAFR P2RX4 SCPEP1 OXTR ACTA2 KCNK6 ADIPOQ PRCP PCSK5 EMP2 F2RL1 CD34 ADM AVPR1A CPA3 ABAT PLCB3 EDNRA SLC2A5 ID2 ERAP1 ATP1A1 EDN1 EDNRB PTGS1 ARHGAP42 ACVRL1 APLN CYBA BMPR2 RHOA NPY1R HMOX1 SMAD3 ECE1 CTSZ GJA5 F11R EDN3 EPHX2 CNR1 NCALD SERPINF2 AGT ADRB3 HSD11B2
LYMPHOCYTE_DIFFERENTIATION	0.00147929	0.0135741	0.499319	2.16198	0	307	144	SFRP1 AXL PTPRJ TGFBR2 KIT GAS6 IL1RL2 LEPR DOCK11 MERTK B2M ANXA1 NCKAP1L FCER1G SEMA4A IRF4 ITGA4 MMP14 PLA2G2D FCGR2B RSAD2 PLCG2 CD74 SOX4 TGFB1 PRELID1 CARD11 PREX1 DOCK10 PTPN22 NFAM1 INPP5D DTX1 LGALS9 SASH3 VCAM1 ATP7A SYK MFNG CD83 TLR9 ZFP36L2 IKZF3 SPINK5 PTPRC IKZF1 ATM DOCK2 LY9 PTPN6 KLF6 EGR1 SPN PNP ADAM8 BTK SLAMF8 RBPJ PTK2B VNN1 ATP11C ID2 ZFP36L1 GLI3 VAV1 AP3B1 RUNX3 IL7R CD3…
ACTIN_FILAMENT_DEPOLYMERIZATION	0.00330579	0.0202312	0.499091	1.67959	1	48	22	LIMA1 TMOD2 DSTN EPS8 TMOD3 CFL1 SWAP70 SEMA5A GSN ADD3 F2RL1 VILL CAPZA1 ADD1 TWF1 PLEK SPTBN1 SPTAN1 CAPG PLEKHH2 MTPN SPTBN2
EPITHELIAL_CELL_DEVELOPMENT	0.0015625	0.0135741	0.499047	2.06605	0	189	74	CLIC4 MSN HEG1 CLDN3 IQGAP1 CLDN1 ST14 C1GALT1 ESR1 FNDC3A MET TNFRSF1A PECAM1 SIDT2 TNMD RAP1B FLNB EZR VIM ACTA2 SMO ADIPOQ TJP2 TBC1D20 POF1B CDSN F2RL1 MYO1E FAT1 COL23A1 ADD1 SHROOM3 PGR COL18A1 MYADM FASN SDC1 FOSL2 STC1 WNT7B S1PR2 KLF5 RAB25 TYMS SPINT2 ATRX BCL11B FLNA ICAM1 GRHL2 HIF1A BFSP1 ROCK1 SLC4A7 TNF EXPH5 TJP1 HRH2 FRMD6 HYDIN F11R MARVELD2 ABI2 SLC9A3R1 ENG IHH BMP5 YIPF6 ARHG…
ENTRY_INTO_OTHER_ORGANISM_INVOLVED_IN_SYMBIOTIC_INTERACTION	0.0015748	0.0135741	0.499014	1.93524	0	118	56	AXL IFITM2 MRC1 GAS6 DPP4 CLDN1 CTSB CCR5 MET CXADR CAV1 ANPEP SELPLG IFITM3 CDH1 CD74 LGALS9 EGFR GSN CBL MID2 IFITM1 TRIM59 TRIM10 TRIM21 ITGA2 TMPRSS2 TNFRSF14 UVRAG CAV2 CD86 ICAM1 CD4 EFNB3 SLC1A5 CTNND1 CLEC5A CD81 ITGB3 ITCH TYRO3 NCAM1 ITGB7 F11R LDLR GYPA SRC CDHR3 HYAL1 ITGB1 TRIM25 XPR1 NUP153 TRIM62 HSPA1B KRT6A
NEGATIVE_REGULATION_OF_CELL_MOTILITY	0.00151286	0.0135741	0.498928	2.11024	0	241	114	CLIC4 DCN SFRP1 APOE FBLN1 PTPRJ PPARG IGFBP3 PLCB1 SFRP2 CTNNA1 CYP1B1 ABHD2 AKT1 MCTP1 DPYSL3 RECK NBL1 SRGAP1 SULF1 SPRED1 SERPINF1 SEMA3A APOD EVL CDH1 SRGAP3 TACSTD2 ADTRP ADAM15 TGFB1 ADIPOQ DPEP1 CD300A THBS1 CORO1B ARHGDIB PTPRM TMEFF2 RAP2B ANGPT2 CORO1C BST2 CX3CL1 DLC1 PODN IFITM1 SLAMF8 THY1 STAP1 STC1 CD200R1 ROBO1 ACVR1C WAS ADARB1 CALR BCR STARD13 SRGAP2 RRAS SPINT2 KLRK1 STAT3 CXC…
FEMALE_SEX_DIFFERENTIATION	0.00158228	0.0135741	0.498876	1.902	0	103	55	SFRP1 AXL KIT PDGFRA SGPL1 MERTK CTNNA1 NRIP1 SLIT3 ESR1 ADCYAP1R1 MMP14 ARID5B MMP19 LHFPL2 STRA6 RETN WT1 PGR CASP3 ARRB1 RBP4 INHBB FZD4 BCL2 SLIT2 FGF10 ICAM1 LFNG FOXO3 ZFPM2 TYRO3 PCYT1B BCL2L1 LRP2 SRC BMPR1B NUP107 SRD5A1 NOS3 NUPR1 ANG ARRB2 HSPA5 FOXC1 ZFX DMRTA1 INHBA SMAD4 FOXL2 FANCA WNT5A ROBO2 SIRT1 BRCA2
PROTEIN_LIPID_COMPLEX_SUBUNIT_ORGANIZATION	0.00655738	0.0333622	0.498135	1.65506	3	45	25	APOC1 APOE ALB SOAT1 DGAT1 ABCA1 PLTP APOA1 LIPG APOB ABCA5 APOA2 ABCG1 APOC3 MTTP SNX9 AGT APOC4 SH3GL2 LPL LIPC APOC2 APOA5 PLAGL2 P4HB
BODY_MORPHOGENESIS	0.00493421	0.0270265	0.497885	1.68267	2	49	25	PDGFRA SGPL1 GPC3 GREM2 ARID5B TGFB1 STRA6 CRISPLD1 MMP2 NIPBL RRAS LRP6 BRAF PTPN11 CDON DLX5 IHH SKI SSBP3 IFT122 MYH3 PHLDB2 CSRNP1 CRISPLD2 MSX1
NEGATIVE_REGULATION_OF_STRESS_ACTIVATED_PROTEIN_KINASE_SIGNALING_CASCADE	0.01	0.0454455	0.497484	1.60801	5	40	21	SFRP1 SFRP2 AKT1 EZR SIRPA PTPN22 DACT1 F2RL1 PDCD4 MYC MEN1 MAPK8IP1 AMBP PBK ITCH MECOM TAOK3 AIDA SH3RF2 NCOR1 MARVELD3
POSITIVE_REGULATION_OF_RECEPTOR_MEDIATED_ENDOCYTOSIS	0.00655738	0.0333622	0.497463	1.65283	3	45	28	C3 B2M DAB2 PLCG2 ANXA2 PPT1 SYK CBL SFRP4 ARRB1 BICD1 AHI1 SCYL2 TBC1D5 APLN HNRNPK FMR1 MAGI2 GREM1 HIST1H1A SELE CCL19 LDLRAP1 CLU ARRB2 HIP1R APOA5 HIP1
LEUKOCYTE_HOMEOSTASIS	0.00162866	0.0135741	0.497457	1.81281	0	81	39	AXL DOCK11 MERTK SH2B2 ANXA1 AKT1 NCKAP1L FCER1G LYN CD74 TGFB1 DOCK10 TNFRSF13C LGALS9 P2RX7 TNFAIP3 SLC7A11 CASP3 TNFSF13B IL2RA BCL2 FLT3 GPR183 HIF1A ADA SKIL GPR174 RIPK3 BCL2L11 CCR2 CORO1A PMAIP1 CXCR2 PIK3CB TNFRSF13B SPTA1 TNFSF14 LAT ADAM17
AMYLOID_BETA_METABOLIC_PROCESS	0.0100167	0.0454933	0.497373	1.58646	5	38	15	MME APOE IGF1 APP ACE ADAM10 PSEN1 MGAT3 CASP3 PICALM BACE2 ROCK1 NCSTN HAP1 EPHA4
CELLULAR_RESPONSE_TO_BIOTIC_STIMULUS	0.00156006	0.0135741	0.49659	2.06014	0	193	87	AXL CXCL9 CD68 MRC1 AKT1 CCR5 LITAF TNFRSF1B LYN PTAFR FCGR2B TLR4 CD180 LY86 VIM ABCA1 TGFB1 SIRPA PTPN22 HCK EIF2AK3 PYCARD SYK CASP1 TICAM2 TNFAIP3 CD14 LCN2 CX3CL1 TFPI LBP PDCD4 IRAK2 BTK PF4 MAPK3 STAP1 CCL5 CD274 CMPK2 KMO SBNO2 IRF8 EDNRB BCR ZMPSTE24 KLRK1 CAPN2 TSPO CD86 NFKB1 APAF1 CD36 RHOA ICAM1 TLR1 IL1RN SMC1A CEBPE HAVCR2 ARG1 HMGB2 CD6 TNF PPARGC1A SASH1 BCL2L11 MALT1 CCL2 LTF TR…
CELL_ACTIVATION	0.00127389	0.0135741	0.496571	2.35687	0	1171	555	FGL2 MME CYBB CSRP1 SFRP1 AXL APOE DSP TIMP2 CD68 PTPRJ EEF1A1 TGFBR2 ARSB C3 KIT GNS PLCB1 GAS6 MSN IL1RL2 PDGFRA LEPR DOCK11 GM2A MERTK CD44 B2M ANXA1 TLR8 IL6ST COMP VAT1 DPP4 PYGB AKT1 IQGAP1 CLIC1 PGRMC1 ASAH1 GNG2 GPNMB CTSH NCKAP1L ITGAM NEDD4 IGF1 CTSC TLR7 IQGAP2 CMTM6 CTSB FCER1G SEMA4A APP CXADR PLAC8 CAV1 NDRG1 TNFRSF1B IRF4 GRN PECAM1 TYROBP GNB1 LYN ITGA4 C1QA RAB31 CD33 ACPP MMP14 …
REGULATION_OF_LIPID_CATABOLIC_PROCESS	0.00495868	0.0270956	0.496371	1.67044	2	48	25	APOC1 BSCL2 AKT1 LGALS12 RARRES2 CPT1A ABCD2 PDE3B PIK3CG PNPLA2 FABP1 IRS2 APOA2 CIDEA APOC3 TNF LDLR CNR1 CDK4 TWIST1 PRKAA1 ANGPTL3 APOC2 ADRA2A APOA5
GENITALIA_DEVELOPMENT	0.01	0.0454455	0.4961	1.60354	5	40	17	AXL PDGFRA MERTK ESR1 STRA6 WT1 TIFAB NIPBL RBP4 LRP6 FGF10 PTPN11 ROR2 TYRO3 TCF7 LRP2 BMP5
REGULATION_OF_LYMPHOCYTE_DIFFERENTIATION	0.0015528	0.0135741	0.495991	1.98472	0	149	87	SFRP1 AXL TGFBR2 GAS6 IL1RL2 ANXA1 NCKAP1L IRF4 MMP14 CD74 TGFB1 PRELID1 CARD11 NFAM1 INPP5D DTX1 LGALS9 SASH3 SYK CD83 TLR9 ZFP36L2 IKZF3 SPINK5 PTPRC PTPN6 PNP ADAM8 BTK SLAMF8 VNN1 ATP11C ID2 ZFP36L1 GLI3 AP3B1 RUNX3 IL7R IL7 CD86 IL2RA LILRB4 RHOA CD2 SH3RF1 LOXL3 BRAF ADA RASGRP1 RUNX1 MALT1 IRF1 CCR2 ZMIZ1 SOCS1 ZEB1 PGLYRP2 IHH IL18 NFKBID PRKCZ GATA3 EGR3 PRDM1 CD27 TOX IL12RB1 CCL19 MYB …
ACTIN_NUCLEATION	0.00665557	0.0335474	0.495414	1.64595	3	46	17	ARPC1B NCKAP1 IQGAP2 WIPF1 EVL CORO1B GSN CYFIP1 ARPC5 GMFB WAS ACTR3 SPIRE1 GMFG FMN1 CORO1A ABI2
ODONTOGENESIS_OF_DENTIN_CONTAINING_TOOTH	0.00161812	0.0135741	0.495407	1.79391	0	78	34	PDGFRA ITGA6 CTNNA1 TNC PERP SMPD3 SMO ADM CSF1 EDA GLI3 ITGB4 BCL11B LRP6 HAND2 FGF10 HDAC1 SOSTDC1 BCL2L11 BMP7 WNT6 MSX2 TNFRSF11B SCN5A ATF2 CSF3R HTRA1 TRAF6 GLI2 FOXC1 MSX1 FAM20A DLX3 FOXO1
BIOMINERAL_TISSUE_DEVELOPMENT	0.0015528	0.0135741	0.495256	1.95896	0	138	55	LOX GAS6 GPM6B DDR2 COMP GPC3 OMD GPNMB IGF1 CCR1 SRGN SMPD3 AHSG CLEC3B TGFB1 ANXA2 EIF2AK3 OSR1 P2RX7 SNX10 ALOX15 MGP ENPP1 FGFR2 S1PR1 ECM1 FGR DUOX2 PTK2B SBNO2 ANO6 ZMPSTE24 FBN2 TMEM119 PTN BMPR2 ASPN HIF1A ROCK1 FAM83H SMAD3 ROR2 BMP7 LTF WNT6 TUFT1 MSX2 TXLNG OSR2 FGFR3 OTOP1 BMPR1B TFAP2A PTH1R GREM1
TAXIS	0.00138889	0.0135741	0.495236	2.24813	0	547	254	NTN4 CXCL9 PTPRJ LOX KIT GAS6 FLRT2 PDGFRA PARVA FAM129B EMB ANXA1 SEMA3D SLIT3 ALCAM GPNMB RARRES2 NCKAP1L CCR1 CCR5 FCER1G MET SEMA4A APP CXADR CCL8 LPAR1 CAMK1D NBL1 CHL1 LYN PTPRA CSF1R STK39 SEMA3F ENPP2 THBS4 FYN PTAFR P2RX4 PIK3CG SEMA3A IL17RC ADAM10 GFRA1 NTN1 EVL C3AR1 EZR MATN2 GAB2 SWAP70 ITGA1 ITGB2 CMTM3 SMO CD74 TGFB1 ABCC1 LGMN PLXNA4 EXT1 PREX1 THBS1 LGALS9 BOC CORO1B BST1 SEMA5A…
POSITIVE_REGULATION_OF_FAT_CELL_DIFFERENTIATION	0.00328407	0.0202312	0.49515	1.70001	1	56	21	SFRP1 PPARG SH3PXD2B SFRP2 AKT1 RARRES2 MEDAG CCDC3 ZBTB7C CEBPA ID2 ZFP36L1 CREB1 TPH1 KLF5 WDFY2 PRDM16 STK4 ADIG STK3 WIF1
REGULATION_OF_BODY_FLUID_LEVELS	0.00144509	0.0135741	0.495117	2.20622	0	432	208	MMRN1 CSRP1 AXL APOE FBLN1 GAS6 PROS1 ANXA8 SERPING1 PDGFRA CCND1 DOCK11 MERTK HEG1 SH2B2 COMP ENTPD1 ADCY3 PAPSS2 CLIC1 GNG2 CLDN1 FCER1G PLAT MET CAV1 GNB1 LYN PAM STK39 VAV2 CD9 F2R CDO1 FYN F13A1 P2RX4 PIK3CG PRLR HPSE ANXA5 PRKCB SELP TLR4 OXTR PRKAR2B FERMT3 PLCG2 MYO5B ADTRP JMJD1C GNA13 PRCP THBS1 ANXA2 GNA12 MAFF EMP2 F2RL1 ATP7A SYK PIK3R5 CD34 P2RX7 RAP2B VDR CAPZA1 GNAI2 LCP2 ADM RCOR…
EXOCRINE_SYSTEM_DEVELOPMENT	0.00655738	0.0333622	0.495091	1.64495	3	45	18	NTN4 TWSG1 SEMA3A TGFB1 TGM2 EGFR HGF FGFR2 EDA FGF10 ESRP2 SEMA3C PLXNA1 BTBD7 TNF BMP7 FGF7 IGF2
ENSHEATHMENT_OF_NEURONS	0.0015873	0.0135741	0.495018	1.91393	0	116	52	MYO5A AKT1 SBF2 NDRG1 TNFRSF1B LPAR1 MBP NTRK2 ABCD2 CD9 MARVELD1 BCAS1 TGFB1 EIF2AK3 PLLP SERINC5 HGF ACSBG1 PIKFYVE PLP1 MALL B4GALT6 ATRN HEXB MYRF GALC FA2H FAM126A ACER3 TSPAN2 NAB1 GJC3 MAL2 SLC8A3 PMP22 TENM4 S100B MYOC WASF3 MAL EGR2 ARHGEF10 NCSTN PTEN SKI MTMR2 TLR2 LGI4 ID4 FIG4 PRX CNTN2
REGULATION_OF_ORGAN_GROWTH	0.00157729	0.0135741	0.494947	1.83855	0	87	33	POR TGFBR2 AKT1 RGS2 IGF1 CXADR RIPK1 WWC1 BASP1 SMO KCNK2 SASH3 WT1 SLC6A4 FGFR2 LATS2 WWC2 RBPJ SERP1 RBP4 EDN1 GATA6 IL7 MAPK11 WNT2 STK4 STK3 ZFPM2 CCNB1 BCL2L11 TGFBR3 ERBB4 PTEN
SKIN_DEVELOPMENT	0.00146628	0.0135741	0.494617	2.14969	0	311	142	CLIC4 DSP MYO5A CD109 ITGA6 ANXA1 COMP KRT17 ASAH1 KRT14 CLDN1 ST14 MET IRF6 KRT71 PERP DHCR24 PCSK6 KRT19 HPSE FLNB ADAMTS2 ASPRV1 KRT79 SMO PKP1 EGFR CELSR1 CDSN DSG2 ATP7A VDR PSEN1 SPINK5 KRT10 CLDN4 KRT7 PKP3 FGFR2 KRT80 PKP4 DSC3 CASP3 KRT77 KRT1 RBPJ H2AFY2 DSC1 KRT15 EDA ITGA2 FOSL2 EVPL ZFP36L1 LDB2 KRT5 KRT23 GRHL1 FA2H FZD3 LOR ZMPSTE24 ITGB4 PRSS8 FERMT1 KRT8 SPRR1A BCL11B BCL2 STK4 F…
CARBOHYDRATE_TRANSMEMBRANE_TRANSPORT	0.00158983	0.0135741	0.494595	1.84065	0	91	34	C3 SORT1 GPC3 AKT1 IGF1 PRKCI PRKCB PID1 ADIPOQ RNASEL FABP5 MEF2A ENPP1 ADIPOR2 EDNRA SLC2A5 FFAR4 SORBS1 EDN1 IRS2 SLC2A3 BRAF SLC23A2 GRB10 PTPN11 TNF NFE2L2 SLC23A1 SLC2A1 NR4A3 PRKAG2 SLC17A5 SLC2A9 SESN2
EMBRYONIC_DIGIT_MORPHOGENESIS	0.00332779	0.0202312	0.494208	1.68905	1	55	30	SFRP2 CHST11 GNA12 OSR1 GLI3 HAND2 GRHL2 FZD6 HDAC1 SALL1 ROR2 ECE1 BCL2L11 MSX2 OSR2 HOXA11 FREM2 IHH IFT122 TWIST1 GLI2 TMEM231 NOTCH1 MSX1 SMAD4 INTU WNT7A WNT5A C2CD3 WDPCP
REGULATION_OF_WOUND_HEALING	0.00155039	0.0135741	0.494103	1.93518	0	123	59	APOE TGFBR2 PROS1 SERPING1 PDGFRA CD109 ANXA1 FCER1G PLAT CAV1 LYN CD9 F2R HPSE ANXA5 SELP TLR4 ADTRP THBS1 ANXA2 F2RL1 SYK CD34 TNFAIP3 HMGCR TFPI ABAT C1QTNF1 PDPN FGB PLG FGA CEACAM1 CASK KRT1 DUOX2 KNG1 FGG ANO6 EDN1 PLEK SERPINC1 CD36 UBASH3B EPPK1 CADM4 F3 MYLK SMAD3 NFE2L2 F2 THBD PLAUR PTEN SERPINF2 SERPINB2 DUOX1 FGF2 HRG
NEGATIVE_REGULATION_OF_BMP_SIGNALING_PATHWAY	0.00665557	0.0335474	0.494085	1.64154	3	46	23	SFRP1 SFRP2 CHRDL1 FZD1 GREM2 NBL1 TWSG1 CTDSPL2 RBPMS2 SMURF2 VWC2 SKIL SOSTDC1 LRP2 SKI SMURF1 GREM1 HTRA1 HIPK2 TMPRSS6 TRIM33 NOTCH1 FSTL3
RESPONSE_TO_BACTERIUM	0.00140056	0.0135741	0.49384	2.22306	0	470	244	DCN AXL CXCL9 CD68 C3 MRC1 CSF2RB B2M MPEG1 GPC3 AKT1 RARRES2 SCN7A CLDN1 CCR5 FCER1G PLAC8 LITAF CAV1 TNFRSF1B TNFRSF1A GRN LYN F2R PTAFR PYGL FCGR2B SELP TLR4 CD180 LY86 C4B PENK VIM TLR5 ABCA1 PLCG2 IRF5 GNG12 TGFB1 ADIPOQ SIRPA ACP5 PTPN22 LGALS9 HCK PTGFR CASP8 GPM6A VCAM1 SLC11A1 F2RL1 PYCARD SYK PCK1 CASP1 TMEM229B P2RX7 IRAK3 TICAM2 HPGD RPS6KA3 NLRC5 TLR9 IKZF3 TNFAIP3 SPINK5 CD14 FMO1 L…
COLLAGEN_BIOSYNTHETIC_PROCESS	0.00991736	0.0454455	0.49375	1.60957	5	41	20	PPARG F2R VIM CIITA TGFB1 RCN3 ADAMTS3 ITGA2 CREB3L1 SUCO ERRFI1 ARG1 F2 ENG LARP6 IHH SERPINB7 SERPINF2 SERPINH1 MYB
NEGATIVE_REGULATION_OF_RESPONSE_TO_OXIDATIVE_STRESS	0.00996678	0.0454455	0.493689	1.58719	5	39	14	AKT1 MCTP1 FZD1 MET NCOA7 FYN HGF LRRK2 SLC7A11 VNN1 NONO HIF1A NFE2L2 NR4A3
PHENOL_CONTAINING_COMPOUND_BIOSYNTHETIC_PROCESS	0.00996678	0.0454455	0.493673	1.58714	5	39	22	MYO5A HDC ZEB2 MOXD1 SLC7A11 TPH1 HAND2 CDH3 TRPC1 PAH NR4A2 CITED1 GATA3 CTNS GCH1 RAPGEF2 SNCA WNT5A APPL1 SLC24A5 VPS35 PMEL
CELL_ACTIVATION_INVOLVED_IN_IMMUNE_RESPONSE	0.00139082	0.0135741	0.49363	2.24927	0	594	255	FGL2 MME CYBB DSP TIMP2 CD68 PTPRJ EEF1A1 ARSB C3 KIT GNS DOCK11 GM2A CD44 B2M ANXA1 VAT1 PYGB IQGAP1 PGRMC1 ASAH1 CTSH NCKAP1L ITGAM CTSC IQGAP2 CMTM6 CTSB FCER1G SEMA4A APP PLAC8 TNFRSF1B IRF4 GRN PECAM1 TYROBP LYN RAB31 CD33 ACPP NPC2 ACLY CAP1 QPCT COTL1 PIGR SLC27A2 APBB1IP PTAFR PIK3CG ANPEP PYGL ADAM10 RAP1B LRMP AHSG HPSE FCGR2B CTSS C3AR1 ENPP3 PLEKHO2 DGAT1 TLR4 DNASE1L3 CD180 HEBP2 GAB…
REGULATION_OF_BMP_SIGNALING_PATHWAY	0.00160514	0.0135741	0.493601	1.80348	0	80	40	SFRP1 XIAP SFRP2 GPC3 SFRP5 CHRDL1 FZD1 GREM2 NBL1 TWSG1 SULF1 PCSK6 SFRP4 CTDSPL2 RBPMS2 RBPJ SMURF2 ACVRL1 GDF5 BMPR2 VWC2 SKIL SOSTDC1 MSX2 LRP2 ITGA3 ENG SKI SMURF1 GREM1 HTRA1 HIPK2 RNF165 TMPRSS6 CRB2 TRIM33 TFAP2B NOTCH1 FSTL3 MSX1
REGULATION_OF_STEROID_BIOSYNTHETIC_PROCESS	0.00161812	0.0135741	0.49345	1.78683	0	78	38	APOE POR ASAH1 ACACA SP1 IGFBP7 SQLE VDR ADM SREBF2 HMGCR ELOVL6 EGR1 APOB FASN STARD4 ATP1A1 ERLIN2 TSPO ABCG1 NFKB1 KPNB1 MBTPS1 NFYA SCAP ERLIN1 TNF PPARGC1A INSIG1 GFI1 SEC14L2 BMP5 DKKL1 IDI1 PROX1 LSS NR1H4 PRKAA1
DEFENSE_RESPONSE_TO_VIRUS	0.00157978	0.0135741	0.493137	2.0072	0	173	80	IFITM2 CXCL9 TRIM44 TLR8 ISG20 UNC93B1 TLR7 RNF125 DHX9 IFITM3 IFIT2 RSAD2 IRF5 IRF7 ZC3HAV1 SERINC3 IFNAR2 DTX3L RNASEL F2RL1 PYCARD GBP1 DNAJC3 NLRC5 TLR9 IFIH1 TNFAIP3 SERINC5 BST2 PTPRC TMEM173 RTP4 DDX58 TLR3 SAMHD1 APOBEC1 GBP3 IFITM1 PARP9 STAT1 IRF9 OAS3 TRIM56 ADARB1 ZMPSTE24 ADAR MAP3K14 EIF2AK2 IL2RA FLNA BCL2 PRF1 IL10RB IL33 FAM111A ZCCHC3 IFIT1 MMP12 ITCH IRF1 DDX21 AIM2 CD40 DDX60 …
NEPHRON_DEVELOPMENT	0.0015674	0.0135741	0.492746	1.9434	0	137	65	SULF2 PDGFRA MAGED1 GPC3 IQGAP1 ENPEP PLCE1 PECAM1 SULF1 BASP1 PKD2 ACTA2 SMO TACSTD2 TGFB1 ADIPOQ PBX1 OSR1 MYO1E CD34 MTSS1 ANGPT2 WT1 NID1 WWTR1 EGR1 STAT1 MYC WNT7B GLI3 AHI1 CALB1 WNT2B BCL2 IRX1 CFLAR SEC61A1 PTCH1 PDGFD IRX2 SALL1 PAX2 VANGL2 BMP7 RET WNT6 TEK FMN1 TCF21 ITGA3 HOXA11 NPNT DCHS1 GDNF PROM1 SERPINB7 CITED1 AGT PODXL MAGI2 GATA3 NUP107 GREM1 FGF2 NUP160
REGULATION_OF_VASCULAR_SMOOTH_MUSCLE_CELL_PROLIFERATION	0.00496689	0.0271002	0.492502	1.66707	2	51	26	PPARG IGF1 GNAI3 MAP3K5 ADIPOQ HPGD GNAI2 MMP2 PDCD4 CNN1 EDN1 JAK2 APLN IGFBP5 ERN1 HMOX1 DNMT1 TNF NR4A3 MYOCD PTEN AGT FGF2 P2RY6 LDLRAP1 MMP9
T_CELL_DIFFERENTIATION	0.0015456	0.0135741	0.492336	2.05746	0	216	114	TGFBR2 KIT IL1RL2 LEPR B2M ANXA1 NCKAP1L FCER1G SEMA4A IRF4 PLA2G2D RSAD2 CD74 SOX4 TGFB1 PRELID1 CARD11 PREX1 PTPN22 DTX1 LGALS9 SASH3 ATP7A SYK CD83 ZFP36L2 SPINK5 PTPRC DOCK2 LY9 EGR1 SPN PNP ADAM8 VNN1 ZFP36L1 GLI3 VAV1 AP3B1 RUNX3 IL7R CD3D IL7 STAT3 CD86 IL2RA BCL11B LILRB4 BCL2 RHOA CD2 BCL3 CD4 GPR183 SH3RF1 LOXL3 LFNG BRAF ADA RASGRP1 LCK RUNX1 SLAMF6 RIPK3 IL18R1 RORA MALT1 EOMES IRF1 C…
RECEPTOR_INTERNALIZATION	0.0015748	0.0135741	0.49231	1.85297	0	96	46	NEDD4 FCER1G CAV1 RAB31 CD9 EZR ITGB2 PLCG2 SYK ADM AP2B1 SNX1 ANKRD13A SFRP4 CEACAM1 PICALM ARRB1 CALCRL AHI1 SCYL2 TBC1D5 OPHN1 RSPO1 APLN CD36 SDCBP CD81 ITGB3 FMR1 USP46 CXCR2 MTMR2 ITGB1 MAGI2 DNM1 GREM1 SELE SH3GL2 CNTN2 CLTC LDLRAP1 LRP1 RAB5A GRIA1 ARRB2 DNM3
CEREBRAL_CORTEX_CELL_MIGRATION	0.01	0.0454455	0.492187	1.59089	5	40	16	LAMB1 SEMA3A EGFR PSEN1 RELN GLI3 ROBO1 P2RY12 SRGAP2 DIXDC1 NRP2 SLIT2 RHOA LHX6 MBOAT7 DAB1
REGULATION_OF_SMOOTHENED_SIGNALING_PATHWAY	0.00162338	0.0135741	0.491903	1.77384	0	75	31	SFRP1 POR CTNNA1 GPC3 GAS1 RAB34 SMO RB1 SHOX2 FGFR2 TTC21B GLI3 FGF10 PTCH1 SCUBE1 CHSY1 DLG5 RORA IFT80 CD3E SCUBE3 IFT81 GPR161 NDST1 IHH IFT122 KCTD11 SUFU GAS8 RPGRIP1L GLI2
METANEPHRIC_NEPHRON_DEVELOPMENT	0.01	0.0454455	0.491791	1.58961	5	40	19	PDGFRA PKD2 SMO ADIPOQ OSR1 CD34 WT1 EGR1 STAT1 IRX1 IRX2 SALL1 PAX2 RET FMN1 TCF21 GDNF CITED1 GREM1
ORGANOPHOSPHATE_ESTER_TRANSPORT	0.00158479	0.0135741	0.491362	1.87529	0	104	49	APOC1 APOE ATP8B1 SLC25A24 NPC2 GLTP ATP10A ABCA1 ABCC1 PRELID1 PITPNM1 PLTP APOA1 P2RX7 ATP10B SLC25A32 SLC37A2 MFSD2A ATP11C OSBPL5 ANO6 PLSCR2 APOA2 ATP8B2 ABCG1 ATP11B APOC3 ABCA12 TMEM30B PLEKHA3 ATP10D ATP8B4 MTTP SLC25A23 LDLR ABCA4 PLSCR1 ANO4 KCNN4 SLC44A4 OSBPL10 SLC25A5 ATP11A ATP9A ANO9 SLC25A17 PITPNB PLSCR4 TNFAIP8L3
IMMUNE_EFFECTOR_PROCESS	0.00128041	0.0135741	0.491232	2.30483	0	954	392	FGL2 MME CFH CYBB IFITM2 CXCL9 DSP TIMP2 CD68 PTPRJ EEF1A1 ARSB C3 KIT GNS C2 PROS1 SERPING1 CFB ARPC1B SCARA3 DOCK11 GM2A CD44 B2M TRIM44 ANXA1 TLR8 VAT1 C1S ISG20 PYGB IQGAP1 PGRMC1 ASAH1 C1QB NCKAP1 CTSH NCKAP1L ITGAM UNC93B1 CTSC TLR7 IQGAP2 CMTM6 CTSB FCER1G IL1R1 SEMA4A APP PLAC8 TNFRSF1B C6 IRF4 GRN ACE PECAM1 TYROBP LYN C1QA RNF125 MYO1C C1QC RAB31 CD33 ACPP WIPF1 NPC2 VAV2 ACLY FYN CAP1 …
POSITIVE_REGULATION_OF_HEMOPOIESIS	0.00153139	0.0135741	0.489976	1.99244	0	166	82	AXL TGFBR2 GAS6 IL1RL2 ANXA1 NCKAP1L CCR1 RIPK1 TYROBP MMP14 CD74 TGFB1 INPP5D LGALS9 CASP8 SASH3 SYK HCLS1 CD83 RB1 PTPRC CSF1 PNP ADAM8 BTK TAL1 PF4 STAT1 VNN1 ATP11C ID2 ZFP36L1 ATXN1L CREB1 GLI3 AP3B1 EVI2B RUNX3 IL7R IL7 STAT3 CD86 IL2RA LILRB4 RHOA CD4 HIF1A ADA RASGRP1 RUNX1 FOXO3 HMGB2 ROR2 TNF MALT1 ZMIZ1 SOCS1 IHH IL18 FAM210B NFKBID GPR68 PRKCZ GATA3 EGR3 FES CD27 TOX IL12RB1 TRAF6 CCL…
CYTOKINE_PRODUCTION	0.0013624	0.0135741	0.489533	2.24659	0	639	298	CYBB AXL SULF2 PTPRJ C3 KIT PLCB1 GAS6 IL1RL2 MERTK HEG1 B2M ANXA1 TLR8 IL6ST ZBP1 CYP1B1 POSTN IQGAP1 GPNMB NCKAP1L LIPA IGF1 TLR7 FCER1G IL1R1 APP LITAF TNFRSF1B MBP IRF4 RIPK1 TYROBP LYN CSF1R RNF125 ABCD2 SRGN F2R TWSG1 CMA1 SULF1 PTAFR PIK3CG DHX9 APOD IL17RC HPSE FCGR2B IGF2BP2 C3AR1 LUM EZR TLR4 RSAD2 TLR5 ABCA1 PLCG2 IRF5 CD74 TGFB1 ADIPOQ SIRPA CARD11 ACP5 THBS1 IRF7 TNFRSF13C PTPN22 NFA…
ENDOCYTOSIS	0.00139665	0.0135741	0.489163	2.20849	0	492	233	APOC1 AXL APOE ACTN4 TGFBR2 PPARG C3 MRC1 RHOJ ALB PIK3C2A SCARA3 TINAGL1 SORT1 B2M GPC3 COLEC12 MCTP1 NCKAP1L ITGAM NEDD4 FCER1G APP CAV1 LGALS3BP HSP90B1 ITGA4 RAB31 WIPF1 CD9 ENPP2 DAB2 CAP1 STON1 SIGLEC1 PIK3CG CD163 AHSG FOLR2 RAB34 GAK CLEC7A FCGR2B ENPP3 EZR RIN2 MASP1 ABCA1 ITGB2 PLCG2 CD300A THBS1 APOBR ANXA2 GSN BIN2 LGALS3 HPX PPT1 F2RL1 PYCARD SYK APOA1 MYO1E FNBP1 SNX10 ALOX15 ANKFY1…
REGULATION_OF_SMALL_GTPASE_MEDIATED_SIGNAL_TRANSDUCTION	0.00148588	0.0135741	0.488878	2.12183	0	315	162	CGNL1 FAM13A APOE TIMP2 RHOJ MAP4K4 HEG1 SH2B2 RASA3 EPS8 IGF1 MET PLCE1 LPAR1 ARHGDIA LYN ADCYAP1R1 SRGAP1 VAV2 F2R CYTH3 PLEKHG1 ARAP2 SRGAP3 ARHGEF3 SYDE2 ABCA1 PREX1 GNA13 RACGAP1 ARHGEF28 RALGPS2 CYTH4 ARHGAP29 ARHGDIB F2RL1 RALGAPA2 APOA1 ARHGAP32 ARHGAP1 NET1 RAC2 CBL MYO9A DLC1 RELN ARHGAP25 CSF1 ARHGAP9 EPHB2 FGD3 ARRB1 ITSN2 ARHGAP31 ARHGAP26 ARHGEF37 ARHGEF19 ARHGAP11A TAGAP VAV1 PSD4 …
GLIAL_CELL_MIGRATION	0.00983607	0.0452607	0.48879	1.62401	5	45	22	LAMB1 MMP14 P2RX4 MATN2 RELN CSF1 HEXB STAP1 GLI3 P2RY12 SRGAP2 TSPO CERS2 GPR183 APCDD1 MBOAT7 CCR2 CCL2 TREM2 DAB1 EPHA4 CX3CR1
LEUKOCYTE_MEDIATED_IMMUNITY	0.00137741	0.0135741	0.488776	2.24024	0	643	281	FGL2 MME CYBB DSP TIMP2 CD68 PTPRJ EEF1A1 ARSB C3 KIT GNS C2 SERPING1 GM2A CD44 B2M TLR8 VAT1 C1S PYGB IQGAP1 PGRMC1 ASAH1 C1QB CTSH NCKAP1L ITGAM CTSC IQGAP2 CMTM6 CTSB FCER1G IL1R1 PLAC8 TNFRSF1B C6 GRN ACE PECAM1 TYROBP LYN C1QA C1QC RAB31 CD33 ACPP NPC2 ACLY CAP1 QPCT COTL1 PIGR SLC27A2 PTAFR PIK3CG ANPEP PYGL ADAM10 RAP1B LRMP AHSG HPSE FCGR2B CTSS C3AR1 PLEKHO2 DGAT1 TLR4 DNASE1L3 HEBP2 C4B…
NEURAL_TUBE_DEVELOPMENT	0.00154083	0.0135741	0.488582	1.95981	0	150	67	SFRP1 SFRP2 FZD1 LUZP1 ST14 PTK7 CFL1 PKD2 PHGDH ZEB2 SMO SOX4 TGFB1 CELSR1 PLXNB2 DACT1 PSEN1 ADM DLC1 SHROOM3 ZFP36L1 GLI3 ALDH1A2 FZD3 PLXNA2 SPINT1 MTHFD1L SPINT2 APAF1 LRP6 STK4 GRHL2 FZD6 HIF1A PTCH1 SEMA3C STK3 GDF7 ARL13B PAX2 VANGL2 BMP7 KIF20B GPR161 SETD2 TCF7 LRP2 KDM2B WDR19 DCHS1 BMP5 SKI SSBP3 FZD2 IFT122 ITPK1 TWIST1 SUFU TRAF6 SDC4 RPGRIP1L PRICKLE1 PLOD3 SOX17 PROX1 GLI2 GRHL3
NEGATIVE_REGULATION_OF_DEFENSE_RESPONSE	0.00153139	0.0135741	0.488238	1.98537	0	166	74	APOE PPARG SERPING1 PTGIS IGF1 TNFRSF1B TNFRSF1A GRN RNF125 ABCD2 NT5E SERPINF1 APOD FCGR2B ENPP3 ADIPOQ SIRPA ACP5 LGALS9 PARP14 PYCARD APOA1 IRAK3 NLRC5 TNFAIP3 RB1 SPINK5 PTPRC CX3CL1 HGF TNFAIP8L2 SAMHD1 MFHAS1 PDCD4 ADCY7 CEACAM1 SLAMF8 KRT1 CALCRL C1QTNF3 FFAR4 CD200R1 IL1R2 BCR VSIG4 IL2RA NFKB1 SOCS3 PBK SERPINB9 ADA HAVCR2 MMP12 SMAD3 ARG1 NMI ITCH RORA TYRO3 F2 CNR2 TEK DCST1 LDLR CD96 …
NEGATIVE_REGULATION_OF_LOCOMOTION	0.0015083	0.0135741	0.487918	2.09694	0	286	138	CLIC4 DCN SFRP1 APOE FBLN1 PTPRJ PPARG IGFBP3 PLCB1 SFRP2 CTNNA1 SEMA3D CYP1B1 ABHD2 AKT1 MCTP1 DPYSL3 RECK SEMA4A NBL1 SEMA3F SRGAP1 SULF1 SPRED1 SERPINF1 SEMA3A APOD EVL CDH1 SRGAP3 TACSTD2 ADTRP ADAM15 TGFB1 ADIPOQ DPEP1 CD300A THBS1 CORO1B SEMA5A ARHGDIB PTPRM TMEFF2 RAP2B ANGPT2 CORO1C BST2 CX3CL1 DLC1 MID2 PODN IFITM1 SLAMF8 SEMA3E THY1 STAP1 TRIM21 STC1 SEMA3G CD200R1 ROBO1 ACVR1C WAS ADAR…
APICAL_JUNCTION_ASSEMBLY	0.00328407	0.0202312	0.487787	1.6831	1	57	28	ACTN4 CLDN3 CTNNA1 CLDN1 PRKCI MYO1C POF1B PARD6G STRN MICALL2 PDCD6IP RHOA GRHL2 ROCK1 APC RUNX1 DLG5 TNF TJP1 MPP7 F11R MARVELD2 WDR1 PRKCH MARVELD3 PARD6B OCLN CRB3
POSITIVE_REGULATION_OF_ORGAN_GROWTH	0.00826446	0.0397611	0.487421	1.64032	4	48	24	AKT1 IGF1 BASP1 SMO SASH3 WT1 FGFR2 RBPJ SERP1 EDN1 GATA6 IL7 WNT2 ZFPM2 CCNB1 TGFBR3 ERBB4 FGF2 PROX1 NOTCH1 HAMP HEY2 PIM1 FGFR1
ACTIN_FILAMENT_BUNDLE_ORGANIZATION	0.0015625	0.0135741	0.487035	1.93028	0	141	69	SFRP1 ACTN4 LIMA1 NOX4 PLS3 SH3PXD2B ACTN1 DPYSL3 EPS8 MET LPAR1 HSP90B1 EVL EZR ZYX SWAP70 TACSTD2 CORO1B LCP1 ADD3 APOA1 TMEFF2 ADD1 CX3CL1 DLC1 S1PR1 BAG4 ARRB1 FAM107A PTK2B SORBS1 WAS PLEK LIMK1 ALMS1 PPM1F CD47 WASF2 PLS1 SPIRE1 FLNA GPR65 RHOA ROCK1 MYO1B BRAF FHDC1 PPP1R9A SMAD3 MYOC ARAP1 BAIAP2 S100A10 ARHGEF10 NEDD9 SRC SERPINF2 BAIAP2L1 PAWR ARHGEF5 SLC9A1 ARHGAP6 AIF1 ADD2 SDC4 PHACT…
CELL_JUNCTION_ASSEMBLY	0.00152905	0.0135741	0.486107	2.04206	0	223	120	SFRP1 ACTN4 PTPRJ CDH11 GPM6B MAP4K4 HEG1 CLDN3 ITGA6 ACTN1 CTNNA1 IQGAP1 KRT14 CLDN1 PRKCI CAV1 ACE MYO1C MMP14 CD9 CDH19 APOD RAP1B CDH1 PKP1 THBS1 FBLIM1 POF1B PARD6G STRN CAPZA1 CORO1C MYO9A DLC1 PKP3 PKP4 COL17A1 ACTG1 TRPV4 FAM107A PTK2B THY1 MICALL2 PDCD6IP LAMC2 ITGA2 SORBS1 KRT5 FN1 ITGB4 TRIP6 PPM1F OPHN1 CAMSAP3 ACVRL1 HIPK1 FLNA BCL2 PTPRK RHOA CDH3 GRHL2 GJA1 EFNA5 ROCK1 EPHA3 APC CT…
NEGATIVE_REGULATION_OF_RESPONSE_TO_WOUNDING	0.00161031	0.0135741	0.485939	1.78481	0	84	41	APOE PROS1 SERPING1 PDGFRA CD109 PLAT CD9 ANXA5 ADTRP THBS1 ANXA2 CD34 HMGCR TFPI ABAT C1QTNF1 FGB PLG FGA CEACAM1 CASK KRT1 KNG1 FGG EDN1 CERS2 UBASH3B EPPK1 SMAD3 F2 THBD PLAUR PTEN SERPINF2 SERPINB2 EPHA4 FGF2 HRG NOS3 TMPRSS6 PHLDB2
POSITIVE_REGULATION_OF_LOCOMOTION	0.00141044	0.0135741	0.485778	2.18182	0	466	196	ACTN4 TGFBR2 NOX4 KIT RHOJ GAS6 PIK3C2A DDR2 LAMB1 PDGFRA MAP4K4 EPCAM ITGA6 ANXA1 SEMA3D POSTN PDGFC AKT1 IQGAP1 GPNMB RARRES2 CTSH NCKAP1L IGF1 CCR1 IL1R1 MET SEMA4A APP CAV1 CCL8 LPAR1 CAMK1D GRN LYN ITGA4 CSF1R MYO1C STK39 SEMA3F MMP14 F2R ENPP2 THBS4 GCNT2 DAB2 PTAFR P2RX4 SEMA3A DOCK5 ADAM10 NTN1 C3AR1 SELP SWAP70 FERMT3 SMO CD74 SP1 TGFB1 LGMN PREX1 DOCK7 THBS1 LGALS9 PLVAP SEMA5A EGFR LGA…
MAMMARY_GLAND_EPITHELIUM_DEVELOPMENT	0.00164474	0.0135741	0.485103	1.71159	0	67	35	CCND1 AKT1 ESR1 IRF6 CSF1R NTN1 SMO TGFB1 VDR FGFR2 PGR CSF1 ID2 WNT7B ROBO1 JAK2 WNT2 LRP6 FGF10 ELF5 HIF1A LBH PTCH1 SOSTDC1 AREG MSX2 PML STAT6 ERBB4 SRC GATA3 KDM5B LATS1 GLI2 GPX1
NEGATIVE_REGULATION_OF_SECRETION	0.0015528	0.0135741	0.485021	1.99727	0	181	67	SFRP1 GAS6 UCP2 MAP4K4 ANXA1 TLR8 TNFRSF1B TNFRSF1A SRGN STK39 F2R RAP1B FCGR2B ANXA5 EZR OXTR RSAD2 CD74 ADTRP PTGER3 ADIPOQ CD300A PTPN22 LGALS9 F2RL1 APOA1 GBP1 CD34 RAB11FIP1 GNAI2 TNFAIP3 CX3CL1 HMGCR ABAT TIFAB PFKL CD84 STXBP6 CEACAM1 C1QTNF3 FFAR4 CD200R1 ACVR1C IL1R2 FN1 P2RY12 EDN1 INHBB BCR BANK1 APOA2 ERBB3 IL13RA2 CIDEA IL33 BRAF PPP1R9A ADA HMOX1 PTPN11 TNF FMR1 CCR2 PML VPS4B HDAC9…
REGULATION_OF_STEROID_METABOLIC_PROCESS	0.00158479	0.0135741	0.483771	1.84632	0	104	51	APOC1 APOE POR KIT TTC39B ASAH1 ACACA SP1 IGFBP7 APOA1 SQLE VDR ADM SREBF2 HMGCR ELOVL6 EGR1 APOB FASN STARD4 ATP1A1 ERLIN2 APOA2 TSPO ABCG1 NFKB1 KPNB1 MBTPS1 NFYA SCAP ERLIN1 TNF PPARGC1A RORA INSIG1 LDLR GFI1 EPHX2 UGT1A1 SEC14L2 BMP5 AGT SERPINA12 DKKL1 IDI1 PROX1 LSS LDLRAP1 DGAT2 NR1H4 PRKAA1
DEFENSE_RESPONSE_TO_OTHER_ORGANISM	0.00147275	0.0135741	0.483585	2.11365	0	334	160	IFITM2 CXCL9 TRIM44 TLR8 MPEG1 ISG20 RARRES2 UNC93B1 TLR7 FCER1G PLAC8 IRF4 TNFRSF1A GRN RNF125 COTL1 DHX9 IL17RC CLEC7A IFITM3 SELP TLR4 IFIT2 RSAD2 TLR5 IRF5 TGFB1 ACP5 IRF7 ZC3HAV1 SERINC3 IFNAR2 SLC11A1 DTX3L RNASEL F2RL1 PYCARD SYK GBP1 DNAJC3 P2RX7 NLRC5 TLR9 IFIH1 TNFAIP3 SERINC5 SPINK5 BST2 LCN2 PTPRC TMEM173 RTP4 DDX58 HP TLR3 LBP CFP IL17RA SAMHD1 FGB FGA APOBEC1 SPN GBP3 IFITM1 SLAMF8 …
NEGATIVE_REGULATION_OF_OSSIFICATION	0.00326797	0.0202312	0.483262	1.70279	1	65	33	SFRP1 GDF10 CCR1 SRGN TWSG1 AHSG TGFB1 ECM1 RBPJ PTK2B ID2 TPH1 MEN1 BCL2 HAND2 IGFBP5 HIF1A PTCH1 SMAD3 CHSY1 TNF AREG HDAC4 TWIST2 SKI SMURF1 CITED1 GREM1 TWIST1 SUFU CDK6 NOTCH1 GATA1
REGULATION_OF_ADAPTIVE_IMMUNE_RESPONSE	0.0015528	0.0135741	0.483157	1.89741	0	127	53	C3 B2M ANXA1 IL6ST FCER1G IL1R1 TNFRSF1B FCGR2B RSAD2 TGFB1 IRF7 TNFRSF13C SASH3 SLC11A1 HPX PYCARD P2RX7 ALOX15 TNFAIP3 PTPRC SAMSN1 PTPN6 ADCY7 CEACAM1 BTK TNFSF13B TNFRSF14 CD274 MSH6 WAS IL7R CD48 CD4 IL33 LOXL3 ADA HAVCR2 ARG1 RIPK3 TNF IL18R1 IL1RL1 MALT1 IRF1 CCR2 CD40 IL27RA STAT6 CD226 IL18 NFKBID PRKCZ GATA3
CELL_CELL_JUNCTION_ASSEMBLY	0.00156495	0.0135741	0.483065	1.86286	0	111	54	ACTN4 CDH11 HEG1 CLDN3 CTNNA1 CLDN1 PRKCI CAV1 ACE MYO1C CD9 CDH19 CDH1 PKP1 POF1B PARD6G STRN PKP3 PKP4 TRPV4 MICALL2 PDCD6IP RHOA CDH3 GRHL2 GJA1 ROCK1 APC CTNND1 RUNX1 DLG5 LSR TNF TJP1 MPP7 GJA5 F11R MARVELD2 CDHR3 AGT GJB2 WDR1 PRKCH MARVELD3 CTNND2 CDH2 PARD6B OCLN CRB3 CDH9 CDH22 PKP2 PTPRO NR1H4
REGULATION_OF_RECEPTOR_MEDIATED_ENDOCYTOSIS	0.0015949	0.0135741	0.482768	1.7948	0	90	43	APOC1 C3 B2M DAB2 PLCG2 ANXA2 PPT1 SYK CBL ANKRD13A SFRP4 PICALM ARRB1 BICD1 AHI1 CD2AP DNAJC6 SCYL2 TBC1D5 OPHN1 RSPO1 APLN APOC3 SDCBP HNRNPK ITGB3 SH3GL3 FMR1 USP46 MTMR2 MAGI2 ARF6 GREM1 HIST1H1A SELE PIK3CB SH3GL2 CCL19 LDLRAP1 CLU ARRB2 APOC2 HIP1R
POSITIVE_REGULATION_OF_VASCULATURE_DEVELOPMENT	0.00153374	0.0135741	0.482675	1.96466	0	167	102	CYBB TGFBR2 C3 KIT RHOJ PIK3C2A PTGIS ANXA1 SFRP2 CYP1B1 CTSH C6 GRN CMA1 C3AR1 PRKCB ADAM12 ITGB2 SP1 THBS1 SEMA5A CD34 ANGPT2 CHI3L1 ADM CX3CL1 HGF TLR3 EGR1 ECM1 CEACAM1 PTK2B ERAP1 ANGPTL4 GATA6 RRAS STAT3 ACVRL1 HIPK1 ITGB8 AKT3 C5AR1 LRG1 CFLAR HIF1A MAP3K3 F3 HMOX1 PDGFD RUNX1 NFE2L2 SASH1 BRCA1 TEK CD40 HDAC9 PAK4 ENG SPHK1 MYOCD CXCR2 SERPINB7 HYAL1 ITGB1 GREM1 CX3CR1 FGF2 HIPK2 TMEM100 …
INTERFERON_BETA_PRODUCTION	0.00657895	0.0333622	0.482436	1.63046	3	49	26	TLR8 TLR7 DHX9 TLR4 IRF5 SIRPA IRF7 PYCARD TLR9 IFIH1 TMEM173 DDX58 TLR3 TRIM56 PTPN11 HMGB2 NMI IRF1 TBK1 TLR2 TRAF3 YY1 RNF216 RIPK2 REL POLR3B
POLYOL_BIOSYNTHETIC_PROCESS	0.00164204	0.0135741	0.48203	1.70758	0	69	33	PLCB1 ASAH1 ASAH2 PLCE1 ADCYAP1R1 SPTLC2 PTAFR ACER2 PLCG2 PCK1 EPHX1 PLCB3 PTK2B ISYNA1 PLCB4 PLEK ACER3 PPIP5K2 PCK2 SPTLC1 SPHK1 PTH1R FGF2 GBA ACER1 ITPKA PLCD3 P2RY6 PLCB2 GCH1 ITPKC ITPKB PLCH2
NEGATIVE_REGULATION_OF_SMALL_GTPASE_MEDIATED_SIGNAL_TRANSDUCTION	0.00662252	0.0334266	0.48101	1.62818	3	51	23	CGNL1 TIMP2 HEG1 RASA3 MET DLC1 ARHGAP25 EPHB2 CD2AP ARHGAP42 SLIT2 MYOC SCAI FBP1 ITGA3 RASA2 ITGB1 RASAL3 ABL2 STMN1 RASAL1 STAMBP ADRA1A
POSITIVE_REGULATION_OF_ENDOCYTOSIS	0.0015949	0.0135741	0.480827	1.78759	0	90	34	AXL APOE ACTN4 PPARG C3 B2M GPC3 NCKAP1L RAB31 DAB2 PLCG2 ANXA2 PPT1 F2RL1 SYK ANKFY1 CD14 CBL AP2B1 LRRK2 SFRP4 ARRB1 STAP1 ITGA2 BICD1 AHI1 ANO6 SCYL2 TBC1D5 APLN CD36 HNRNPK FMR1 TSPAN1
ACYLGLYCEROL_METABOLIC_PROCESS	0.00332779	0.0202312	0.480684	1.64282	1	55	28	APOC1 APOE MGLL CAV1 CPT1A DGAT1 PNPLA2 APOBR APOBEC1 APOB CAT SEL1L DGKD APOA2 ABHD12 APOC3 CYP2E1 PTPN11 INSIG1 GK5 SERPINA12 DGKB LPL SLC22A4 GPX1 DGAT2 APOH SLC27A5
REGULATION_OF_CELLULAR_COMPONENT_MOVEMENT	0.0013089	0.0135741	0.480514	2.2439	0	853	353	CLIC4 DCN SFRP1 APOE ACTN4 DSP FBLN1 PTPRJ TGFBR2 ARSB NOX4 PPARG KIT IGFBP3 PLCB1 RHOJ GAS6 PIK3C2A FLRT2 DDR2 MSN LAMB1 PDGFRA MAP4K4 EPCAM ITGA6 ACTN1 ANXA1 SFRP2 CTNNA1 SEMA3D CYP1B1 ABHD2 POSTN PDGFC AKT1 IQGAP1 MCTP1 DPYSL3 GPNMB RARRES2 CTSH NCKAP1L IGF1 RECK CCR1 IL1R1 MET SEMA4A APP PRKX CAV1 CCL8 LPAR1 CAMK1D GRN ACE PECAM1 NBL1 LYN ITGA4 CSF1R MYO1C STK39 SEMA3F SRGAP1 MMP14 CD9 F2R EN…
CELL_KILLING	0.00158228	0.0135741	0.480463	1.81894	0	100	46	B2M CTSH ITGAM CTSC TYROBP FCGR2B DNASE1L3 LGALS9 EMP2 SLAMF7 F2RL1 P2RX7 PTPRC STXBP2 PTPN6 CEACAM1 PF4 STAP1 VAV1 IL7R GZMB KLRK1 LAG3 PRF1 ICAM1 SERPINB9 RASGRP1 HAVCR2 ARG1 AP1G1 SLAMF6 RIPK3 BCL2L11 F2 LTF CORO1A LYST CD226 IL18 HRG NOS2 IL12RB1 RAB27A KRT6A MBL2 ARRB2
LEUKOCYTE_DIFFERENTIATION	0.00141443	0.0135741	0.480376	2.1518	0	451	205	SFRP1 AXL PTPRJ TGFBR2 PPARG KIT GAS6 IL1RL2 LEPR DOCK11 MERTK CD109 B2M RASSF2 ANXA1 GPC3 TMEM176B NCKAP1L CCR1 FCER1G SEMA4A APP IRF4 RIPK1 TYROBP LYN ITGA4 CSF1R C1QC MMP14 PLA2G2D FCGR2B TLR4 RSAD2 GAB2 TMEM176A PLCG2 CD74 SOX4 TGFB1 ADIPOQ PRELID1 CARD11 PREX1 DOCK10 IRF7 PTPN22 NFAM1 INPP5D DTX1 LGALS9 ANXA2 CASP8 UBD SASH3 VCAM1 F2RL1 ATP7A SYK MFNG HCLS1 CD83 SNX10 LRRC17 TLR9 CEBPA ZFP36…
ENDOCHONDRAL_BONE_MORPHOGENESIS	0.00162866	0.0135741	0.479943	1.70855	0	70	36	POR COL14A1 TGFBR2 SCARA3 COMP COL12A1 MMP14 SMPD3 VIT MATN2 ANXA2 SHOX2 TRPV4 STC1 ZMPSTE24 NAB1 THBS3 BMPR2 COCH TEK COL27A1 DLX5 FGFR3 HOXA11 IHH BMPR1B TRIP11 VWA1 CSGALNACT1 SERPINH1 MATN4 MBL2 COL6A2 MMP16 COL6A1 FOXC1
BLOOD_VESSEL_MORPHOGENESIS	0.00141443	0.0135741	0.479867	2.17217	0	528	262	CLIC4 CYBB DCN TGFBI SFRP1 APOE TGFBR2 LOX PPARG C3 RHOJ PIK3C2A PDGFRA LEPR PTGIS SGPL1 PARVA FAM129B HEG1 ANXA1 SFRP2 COMP CYP1B1 AKT1 GPNMB CTSH NEDD4 C1GALT1 RECK SEMA4A PRKX CAV1 ENPEP C6 NTRK2 GRN PECAM1 MMP14 PDE3B VAV2 ENPP2 THBS4 CMA1 SULF1 THBS2 SPRED1 PIK3CG SERPINF1 ANPEP APOD TNMD HPSE C3AR1 PRKCB PKD2 ADAM12 ITGB2 SMO SOX4 ADTRP SP1 ADAM15 TGFB1 GNA13 PRCP THBS1 MMP19 ANXA2 SEMA5A E…
CELL_MOTILITY	0.00124688	0.0135741	0.479539	2.28521	0	1317	586	CLIC4 DCN SFRP1 AXL CXCL9 APOE ACTN4 LIMA1 FBLN1 PTPRJ TGFBR2 LOX ARSB NOX4 PPARG KIT IGFBP3 PLCB1 RHOJ GAS6 PROS1 PIK3C2A FLRT2 DDR2 MSN LAMB1 PDGFRA MAP4K4 SGPL1 PARVA MERTK EPCAM CD44 ITGA6 ANXA1 GPC6 SFRP2 CTNNA1 SEMA3D CYP1B1 GPC3 ADCY3 ABHD2 POSTN DPP4 PDGFC AKT1 IQGAP1 MCTP1 DPYSL3 NCKAP1 GPNMB RARRES2 CTSH ITGBL1 NCKAP1L ITGAM EPS8 GCNT1 IGF1 RECK CCR1 PRKCI CCR5 FCER1G PLAT IL1R1 MET SEM…
REGULATION_OF_RESPONSE_TO_EXTERNAL_STIMULUS	0.00135318	0.0135741	0.479383	2.20691	0	670	311	APOE TGFBR2 PPARG C3 GAS6 PROS1 XIAP SERPING1 IL1RL2 PDGFRA PTGIS CD109 TRIM44 ANXA1 IL6ST SEMA3D RARRES2 NCKAP1L ITGAM IGF1 ESR1 CCR1 MGLL TLR7 FCER1G PLAT IL1R1 MET SEMA4A APP CAV1 PIK3AP1 ADAMTS12 TNFRSF1B PTPRF LPAR1 CAMK1D TNFRSF1A GRN NBL1 LYN C1QA RNF125 ABCD2 OSMR STK39 SEMA3F NT5E CD9 F2R THBS4 CMA1 P2RX4 PIK3CG SERPINF1 DHX9 SEMA3A APOD IL17RC ADAM10 AHSG HPSE FCGR2B C3AR1 ANXA5 ENPP3 S…
DEVELOPMENT_OF_PRIMARY_FEMALE_SEXUAL_CHARACTERISTICS	0.00158983	0.0135741	0.478814	1.78192	0	91	46	SFRP1 KIT PDGFRA SGPL1 CTNNA1 NRIP1 SLIT3 ESR1 ADCYAP1R1 MMP14 ARID5B MMP19 LHFPL2 RETN WT1 PGR CASP3 ARRB1 INHBB FZD4 BCL2 SLIT2 ICAM1 LFNG FOXO3 ZFPM2 PCYT1B BCL2L1 SRC BMPR1B NUP107 NOS3 NUPR1 ANG ARRB2 HSPA5 FOXC1 ZFX DMRTA1 INHBA SMAD4 FOXL2 FANCA ROBO2 SIRT1 BRCA2
FATTY_ACID_BIOSYNTHETIC_PROCESS	0.00155521	0.0135741	0.478681	1.86624	0	121	46	FADS1 APOC1 MYO5A PTGIS HSD17B12 ANXA1 ELOVL5 ABHD2 ACACA MGLL ACSM3 ASAH2 FADS2 ABCD2 ELOVL4 ACLY ACSM5 CD74 ADIPOQ TBXAS1 FABP5 LTC4S HPGD ALOX15 ALOX5 AVPR1A HPGDS PLP1 ELOVL6 ADIPOR2 CEACAM1 FASN LPGAT1 ABHD3 FA2H EDN1 ERLIN2 PTGS1 ELOVL1 FADS3 PTGES DEGS1 APOC3 SCAP ERLIN1 CYP2E1
ANIMAL_ORGAN_REGENERATION	0.00161812	0.0135741	0.478446	1.72404	0	74	33	AXL SULF2 TGFBR2 PPARG GAS6 UCP2 CCND1 CLDN1 TGFB1 PRPS2 LCP1 EGFR NNMT APOA1 ANGPT2 ADM HGF CCNA2 GLI3 TYMS APOA2 CXCL12 C5AR1 FLT3 PTCH1 HMOX1 NR4A3 TGFBR3 UGT1A1 IHH CDK4 RGN PTPRU
RESPONSE_TO_ETHANOL	0.0016	0.0135741	0.478268	1.82979	0	108	46	CYBB CCND1 CLDN3 AACS RGS2 EPS8 CLDN1 TNC ADCYAP1R1 CDO1 FYN PENK ADIPOQ GSN CASP8 VCAM1 HPGD CD14 CBL HMGCR ABAT FGFR2 ADCY7 APOBEC1 ADH7 EIF4EBP1 PTK2B KCNMB1 CAT RBP4 TYMS STAT3 RHOA ICAM1 CYP2E1 SDF4 USP46 ITPR2 CCL7 CNR1 UGT1A1 RGS19 PTEN GATA3 CD27 EEF2
TOLL_LIKE_RECEPTOR_SIGNALING_PATHWAY	0.0015674	0.0135741	0.478237	1.88327	0	131	52	TLR8 COLEC12 ITGAM UNC93B1 ESR1 TLR7 CTSB CAV1 PIK3AP1 IRF4 RIPK1 HSP90B1 LYN CTSS TLR4 RSAD2 TLR5 ITGB2 LGMN CD300A IRF7 PTPN22 CASP8 F2RL1 IRAK3 TICAM2 RPS6KA3 TLR9 TNFAIP3 CD14 TLR3 LBP FGB FGA MFHAS1 IRAK2 APOB BTK CD300LF FGG CNPY3 IRAK4 S100A14 CYBA GRAMD4 CD36 TLR1 TAB3 HAVCR2 TYRO3 IRF1 LTF
TUBE_CLOSURE	0.00157729	0.0135741	0.478184	1.77628	0	87	37	SFRP1 SFRP2 FZD1 ST14 PTK7 ZEB2 TGFB1 CELSR1 PLXNB2 ADM DLC1 SHROOM3 FZD3 SPINT1 MTHFD1L SPINT2 APAF1 LRP6 FGF10 GRHL2 FZD6 PTCH1 PAX2 VANGL2 KIF20B SETD2 LRP2 KDM2B SKI FZD2 IFT122 TWIST1 SUFU TRAF6 SDC4 PRICKLE1 GRHL3
NEGATIVE_REGULATION_OF_CYTOKINE_PRODUCTION	0.0015456	0.0135741	0.477884	2.00534	0	230	124	AXL GAS6 MERTK ANXA1 TLR8 GPNMB NCKAP1L IGF1 TYROBP RNF125 ABCD2 SRGN TWSG1 APOD FCGR2B EZR TLR4 TGFB1 ADIPOQ SIRPA ACP5 THBS1 PTPN22 INPP5D LGALS9 UBE2L6 SLC11A1 F2RL1 PYCARD APOA1 GBP1 CD34 CD83 IRAK3 NLRC5 TLR9 IFIH1 TNFAIP3 BST2 PTPRC CX3CL1 HGF DDX58 CSK LBP PTPN6 PDCD4 ADCY7 CD84 CEACAM1 BTK ORM1 ARRB1 C1QTNF3 FFAR4 CD200R1 CD274 IL1R2 FN1 INHBB CD2AP BANK1 GATA6 APOA2 LAG3 VSIG4 TSPO NFKB1…
NEURON_PROJECTION_GUIDANCE	0.00149477	0.0135741	0.477485	2.02997	0	253	114	NTN4 FLRT2 FAM129B EMB SEMA3D SLIT3 ALCAM SEMA4A APP CHL1 PTPRA CSF1R SEMA3F FYN SEMA3A GFRA1 NTN1 EVL EZR MATN2 GAB2 SMO PLXNA4 EXT1 BOC SEMA5A PLXNB2 CYFIP1 DOK2 PTPRM RAC2 RELN PLXNC1 B3GNT2 EPHB2 GRB7 KIF5C SEMA3E MAPK3 PLXNB1 SEMA3G GLI3 ETV1 ROBO1 MYH10 IRS2 FZD3 PLXNA2 EFNA4 SEMA4B SHC1 SPTBN1 OPHN1 NRCAM CXCL12 SPTAN1 NRP2 BCL11B ZSWIM6 TUBB2B SLIT2 BMPR2 EFNB3 EFNA5 KIF3A EPHA3 PTCH1 SEM…
POSITIVE_REGULATION_OF_GLIOGENESIS	0.00325733	0.0202312	0.476557	1.67255	1	63	30	PPARG IL6ST PRKCI APP LYN C1QA P2RX4 TGFB1 CSF1 ID2 P2RY12 SPINT1 TSPO E2F1 TENM4 HDAC1 TNF CCR2 TREM2 LRP2 RELA TTBK1 PRKCH TLR2 RNF112 MYB LRP1 NOTCH1 GFAP CCL3
REGULATION_OF_RESPONSE_TO_WOUNDING	0.0015528	0.0135741	0.476413	1.90638	0	149	66	APOE TGFBR2 PROS1 SERPING1 PDGFRA CD109 ANXA1 FCER1G PLAT CAV1 PTPRF GRN LYN CD9 F2R HPSE ANXA5 SELP TLR4 ADTRP THBS1 ANXA2 F2RL1 ATP7A SYK CD34 TNFAIP3 HMGCR TFPI ABAT C1QTNF1 PDPN FGB PLG FGA CEACAM1 CASK KRT1 DUOX2 KNG1 FGG ANO6 EDN1 PLEK SERPINC1 CERS2 CD36 BRAF UBASH3B EPPK1 CADM4 F3 MYLK SMAD3 NFE2L2 F2 STK24 THBD PLAUR PTEN SERPINF2 SERPINB2 DUOX1 EPHA4 FGF2 HRG
NEURON_PROJECTION_REGENERATION	0.00332779	0.0202312	0.476383	1.62812	1	55	22	MAP4K4 CTNNA1 PTPRF TNC GRN APOD MATN2 APOA1 ADM HGF THY1 JAK2 TSPO BCL2 CERS2 BRAF STK24 RTN4RL2 PTEN GAP43 EPHA4 KLF4
TISSUE_HOMEOSTASIS	0.00157233	0.0135741	0.476023	1.94934	0	178	84	NOX4 ALB ILDR2 B2M CTSH LIPA ACACA CXADR CSF1R STK39 F2R GCNT2 PIGR P2RX4 NAPSA TLR4 SMO ACP5 INPP5D EGFR SASH3 SYK RCN3 CD34 P2RX7 RAB3D SNX10 TLR9 RAC2 TNFAIP3 RB1 ADD1 MUC4 LRRK1 CSK S1PR1 CSF1 WWTR1 CD38 ADAM8 KRT1 ACTG1 PTK2B LDB2 AZGP1 RBP4 IL7 RDH12 BCL2 AKT3 BBS2 CDH3 ABCA12 UBASH3B ITGB3 PTPN11 CCR2 LTF KRAS TNFRSF11B BARD1 CORO1A ABCA4 PROM1 TUB SRC RAC3 IHH PTH1R CCDC66 BBS12 NOS3 TRAF…
DIGESTION	0.00158479	0.0135741	0.475515	1.80275	0	101	29	LIMA1 ASAH2 ACO1 STK39 EZR TLR4 OXTR PTGER3 TJP2 APOA1 SNX10 VDR TLR9 MUC4 TIFAB FABP1 KCNQ1 SLC2A5 RBP4 SLC46A1 APOA2 COPA PLS1 CD36 FGF10 PPARGC1A HRH2 F11R LDLR
EMBRYONIC_PATTERN_SPECIFICATION	0.00332779	0.0202312	0.475394	1.62475	1	55	29	SEMA3F PCSK6 SEMA3A BASP1 WT1 PGAP1 FGFR2 TIFAB NRP2 LRP6 FGF10 MEOX1 PTCH1 SMAD3 BMP7 ERBB4 IHH RIPPLY3 CITED1 FRS2 EFNB1 SMAD4 WNT7A NRP1 WNT5A GDF3 C2CD3 SMAD2 SMAD6
ERK1_AND_ERK2_CASCADE	0.0014881	0.0135741	0.475384	2.02839	0	259	133	APOE FBLN1 NOX4 KIT GAS6 PDGFRA CD44 PDGFC GPNMB CTSH IGF1 CCR1 APP CCL8 LYN CSF1R F2R GCNT2 SPRED1 RAP1B EZR TLR4 OXTR TIMP3 CD74 TGFB1 ADIPOQ SIRPA PTPN22 LGALS9 EGFR F2RL1 PYCARD SYK GBP1 ALOX15 GNAI2 CHI3L1 ZFP36L2 PTPRC CX3CL1 HMGCR CSK FGFR2 FGB FGA PTPN6 MFHAS1 EPHB2 CEACAM1 MAPK3 TRPV4 ARRB1 PTK2B FFAR4 MYC GLIPR2 ZFP36L1 CCL5 FN1 FGG NOTCH2 RRAS SHC1 RGS14 EIF3A HAND2 FAM83D CD36 C5AR1 F…
MULTI_MULTICELLULAR_ORGANISM_PROCESS	0.00154799	0.0135741	0.475154	1.96366	0	184	74	FBLN1 TGFBR2 UCP2 PTGIS SH3PXD2B AKT1 RGS2 RECK ESR1 CTSB PAM PTAFR PRLR OXTR TGFB1 IGFBP7 LGALS9 PCSK5 PTGFR ARHGDIB MAFF EMP2 DSG2 VDR HPGD ANGPT2 ADM AVPR1A CLDN4 SLC6A4 PGR LNPEP ADIPOR2 MMP2 ADCY7 CD38 PZP HEXB JUNB MAPK3 ITGA2 STC1 ACVR1C MEN1 CALR EDN1 SMURF2 AMBP CAPN2 PAPPA ENDOU BCL2 BMPR2 TCF23 IGFBP5 IGFBP2 OVGP1 HAVCR2 ARG1 FOSB KRAS SLC2A1 SP3 UPRT THBD CNR1 ITGA3 ADRA2C IHH AGT GJB…
CELLULAR_RESPONSE_TO_KETONE	0.00157729	0.0135741	0.47513	1.76493	0	87	42	SFRP1 PPARG MSN AACS ADCY3 AKT1 GNG2 ACACA TNC GNB1 SERPINF1 ADAM15 TGFB1 XRN1 PTGFR EGFR PCK1 AHR MAP4K1 EIF4EBP1 PTGER2 ICAM1 CFLAR ERRFI1 EFNA5 GNAI1 USP8 FOXO3 ARG1 ADCY5 PCK2 NR3C1 ADCY1 SRC CDK4 GJB2 KLF4 ATP2B1 SRD5A1 ELK1 P2RY6 PTGER4
GLYCOPROTEIN_METABOLIC_PROCESS	0.0015528	0.0135741	0.474764	1.86444	0	127	46	DCN MAN2A1 SULF2 DSE BGN UGDH CHST11 MAN2B2 ST8SIA6 MAN1A2 SULF1 PCSK6 HPSE MAN1C1 EXT1 EDEM1 ATP7A GANAB VCAN MAN2B1 CHST14 DSEL SEL1L HS3ST3B1 OS9 HS3ST1 HS2ST1 CHST3 CHPF SGSH CHST15 GNPTAB HIF1A CHST12 MMP12 CHSY1 COL11A1 VANGL2 EDEM2 GLCE UGGT1 MGAT4A NDNF NDST1 HS3ST3A1 IHH
TUBE_MORPHOGENESIS	0.00133511	0.0135741	0.473991	2.19796	0	752	369	CLIC4 CYBB DCN TGFBI SFRP1 APOE TGFBR2 LOX PPARG C3 RHOJ PIK3C2A PDGFRA LEPR PTGIS SGPL1 PARVA MAGED1 FAM129B HEG1 ANXA1 SFRP2 COMP CYP1B1 GPC3 SFRP5 AKT1 GPNMB CTSH FZD1 NEDD4 LUZP1 ST14 C1GALT1 RECK ESR1 MET SEMA4A PRKX CAV1 ENPEP ADAMTS12 C6 NTRK2 TNC GRN PECAM1 CSF1R MMP14 PDE3B VAV2 ENPP2 THBS4 CMA1 SULF1 THBS2 SPRED1 PIK3CG PTK7 SERPINF1 ANPEP APOD TNMD CFL1 NTN1 HPSE C3AR1 PRKCB PKD2 ZEB2 …
MYELOID_LEUKOCYTE_DIFFERENTIATION	0.0015528	0.0135741	0.473846	1.95192	0	182	65	SFRP1 TGFBR2 PPARG KIT CD109 RASSF2 GPC3 CCR1 FCER1G APP IRF4 RIPK1 TYROBP LYN CSF1R C1QC TLR4 GAB2 CD74 TGFB1 ADIPOQ IRF7 INPP5D ANXA2 CASP8 UBD F2RL1 HCLS1 SNX10 LRRC17 CEBPA LILRB3 RB1 PSEN1 LRRK1 TLR3 L3MBTL3 CSF1 JUNB CEACAM1 FASN TAL1 PF4 RBPJ MYC ID2 ZFP36L1 CREB1 EVI2B SBNO2 EFNA4 NOTCH2 TSPAN2 LILRB4 CD4 GPR183 UBASH3B CEBPE BATF2 RUNX1 ROR2 TNF LTF TREM2 SP3
HOMOPHILIC_CELL_ADHESION_VIA_PLASMA_MEMBRANE_ADHESION_MOLECULES	0.00156006	0.0135741	0.473766	1.89051	0	148	75	CDH11 EMB PCDHGC3 MPZL2 PECAM1 PCDH7 CADM3 CDH19 CDH1 CELSR1 PLXNB2 DSG2 PTPRM FAT1 CLSTN1 CD84 AMIGO2 DSC3 CEACAM1 DSC1 CLSTN3 PCDH17 ROBO1 PCDHB9 CDH3 RET PCDHB11 HMCN1 IGSF9B DCHS1 IGSF11 CDHR3 IGSF9 PCDH20 CLSTN2 PCDHB16 ITGB1 PALLD PTPRT PIK3CB PCDHGA4 PCDHGB1 CDH2 PCDH18 CDH9 CNTN2 PCDH9 CDH22 PCDHGA10 SDK2 L1CAM PCDHB15 ANXA3 TENM3 PCDHAC2 PCDHGA6 FAT2 PCDHGA11 CADM1 DSC2 SDK1 PCDHGB6 PCDH…
VASCULOGENESIS	0.00161812	0.0135741	0.473519	1.69474	0	71	34	TGFBR2 SGPL1 HEG1 CAV1 NTRK2 SPRED1 SMO TGFB1 EMP2 MYO1E CD34 ADM WT1 JUNB CEACAM1 ZFP36L1 WNT7B FZD4 ITGB8 ZFPM2 ZMIZ1 TGFBR3 SETD2 ENG MYOCD CITED1 CUL7 TMEM100 SOX17 XDH KDR NOTCH1 AGGF1 RAPGEF2
KIDNEY_MORPHOGENESIS	0.00157729	0.0135741	0.473334	1.77237	0	94	45	MAGED1 GPC3 GCNT1 PRKX BASP1 PKD2 SMO TACSTD2 SOX4 TGFB1 PBX1 OSR1 WT1 LRRK2 WWTR1 STAT1 MYC WNT7B GLI3 AHI1 ZMPSTE24 CALB1 WNT2B BCL2 FGF10 IRX1 FRAS1 PTCH1 IRX2 SALL1 PAX2 VANGL2 BMP7 WNT6 FMN1 TCF21 HOXA11 NPNT DCHS1 GDNF CITED1 AGT GATA3 GREM1 FGF2
MUSCLE_CELL_PROLIFERATION	0.0015528	0.0135741	0.472839	1.94711	0	181	80	TGFBR2 PPARG IGFBP3 OGN PDE1A AKT1 IGF1 CXADR RIPK1 GNAI3 MAP3K5 PTAFR SMPD3 APOD ADIPOQ TGM2 THBS1 KCNK2 EGFR HPGD GNAI2 TNFAIP3 CX3CL1 HMGCR FGFR2 S1PR1 MMP2 PDCD4 RBPMS2 RBPJ STAT1 CALCRL CNN1 ITGA2 ID2 CCL5 RBP4 EDN1 IRAK4 GATA6 JAK2 MAPK11 STAT3 WNT2 APLN CYBA CFLAR IGFBP5 TENM4 ERN1 HMOX1 DNMT1 PDGFD ZFPM2 TNF PPARGC1A CCNB1 HDAC4 NR4A3 TGFBR3 ERBB4 MYOCD PTEN IL18 SERPINF2 AGT FGF2 KLF4 FO…
DEFENSE_RESPONSE_TO_BACTERIUM	0.00153374	0.0135741	0.472437	1.90618	0	157	88	MPEG1 RARRES2 FCER1G PLAC8 TNFRSF1A GRN SELP TLR4 TLR5 ACP5 SLC11A1 F2RL1 PYCARD SYK P2RX7 TLR9 SPINK5 LCN2 HP TLR3 LBP CFP FGB FGA SPN SLAMF8 FGR KLK7 RBPJ TNFRSF14 IRF8 STAB2 S100A14 SHC1 KLRK1 CYBA CD36 C5AR1 BCL3 CD4 COCH CEBPE HAVCR2 GBP6 HMGB2 TNF F2 LTF PRG2 IL27RA LYST PGLYRP2 STAB1 CLEC4E TBK1 TLR2 ARG2 MR1 UNC13B MYD88 FOXP1 NOS2 TLR6 ADAM17 KRT6A ISG15 S100A8 NR1H4 ANXA3 MBL2 SLPI HAMP…
REGULATION_OF_PROTEIN_TYROSINE_KINASE_ACTIVITY	0.00324675	0.0202312	0.471969	1.72288	1	82	38	NOX4 GAS6 NCF1 APP CAV1 NTRK2 ACE CSF1R FYN TGFA RAP2B PSEN1 PTPRC CBL RELN PAK2 GPRC5B TAL1 THY1 NCAPG2 STAP1 AFAP1L2 CCL5 SHC1 ERBB3 ABI1 ERRFI1 PTPN1 NEDD9 SRC AGT EPHA4 GREM1 SOCS4 LRP8 CBLC ADAM17 GPRC5A
TIGHT_JUNCTION_ORGANIZATION	0.00490998	0.0270265	0.471828	1.6041	2	52	25	ACTN4 CLDN3 CLDN1 PRKCI MYO1C POF1B PARD6G STRN MICALL2 PDCD6IP GRHL2 ROCK1 APC RUNX1 LSR TNF TJP1 MPP7 F11R MARVELD2 PRKCH MARVELD3 PARD6B OCLN CRB3
MORPHOGENESIS_OF_EMBRYONIC_EPITHELIUM	0.0015625	0.0135741	0.471305	1.86794	0	141	64	SFRP1 SFRP2 FZD1 LUZP1 ST14 SULF1 PTK7 CFL1 ZEB2 ALDH1A3 SOX4 TGFB1 CELSR1 PLXNB2 OSR1 ADM DLC1 SHROOM3 FGFR2 TGFB1I1 WNT7B ALDH1A2 FZD3 SPINT1 MTHFD1L SPINT2 WNT2B WNT2 APAF1 LRP6 STK4 FGF10 IRX1 GRHL2 FZD6 HIF1A PTCH1 STK3 GDF7 IRX2 PAX2 VANGL2 BMP7 RET KIF20B WNT6 SETD2 LRP2 KDM2B GDNF BMP5 SKI GATA3 TFAP2A GREM1 FZD2 IFT122 TWIST1 SUFU TRAF6 SDC4 PRICKLE1 GLI2 GRHL3
REGULATION_OF_EXTRINSIC_APOPTOTIC_SIGNALING_PATHWAY	0.00158479	0.0135741	0.471155	1.86418	0	142	61	SFRP1 ITGA6 SFRP2 CTNNA1 AKT1 IGF1 CAV1 RIPK1 FYN PDIA3 EYA2 TIMP3 PPP2R1B THBS1 CASP8 LGALS3 PYCARD TNFAIP3 PTPRC CX3CL1 HGF FGB GCLC FGA PAK2 PF4 SRPX FGG PELI3 IL7 BCL2 STK4 FGF10 BID ICAM1 CFLAR SH3RF1 DEPTOR STK3 HMOX1 SKIL HMGB2 TNF CTTN MAL RET BRCA1 PML TRAF1 BCL2L1 PMAIP1 GDNF SRC PTEN RELA BMP5 BMPR1B ATF3 AGT EYA3 SP100
DEFENSE_RESPONSE	0.00126422	0.0135741	0.470956	2.23936	0	1258	567	CFH CYBB AXL IFITM2 CXCL9 APOE CD68 IGFBP4 IFNGR1 NOX4 PPARG C3 MRC1 KIT C2 XIAP SERPING1 CFB IL1RL2 SCARA3 PTGIS SP140 CD44 B2M TRIM44 ANXA1 TLR8 IL6ST ZBP1 MPEG1 C1S ISG20 DPP4 AKT1 COLEC12 NCF1 C1QB RARRES2 LIPA ITGAM UNC93B1 CLDN1 IGF1 ESR1 CCR1 MGLL TLR7 CTSB CCR5 FCER1G IL1R1 IRF6 APP PLAC8 CAV1 LGALS3BP PIK3AP1 ADAMTS12 TNFRSF1B CCL8 C6 CAMK1D IRF4 RIPK1 TNFRSF1A GRN HSP90B1 TYROBP LYN C1Q…
DITERPENOID_METABOLIC_PROCESS	0.00162866	0.0135741	0.470658	1.6755	0	70	36	APOE GPC6 CYP1B1 GPC3 RARRES2 DGAT1 ALDH1A3 SDC2 EGFR APOA1 STRA6 TTR SDC3 DHRS9 APOB ADH7 SDC1 ALDH1A2 RBP4 RBP1 APOA2 RDH12 RDH11 APOC3 LRAT ABCA4 LRP2 SRD5A1 LRP8 ALDH3A2 SDC4 LPL LRP1 DGAT2 BCO2 APOC2
TUBE_DEVELOPMENT	0.00129702	0.0135741	0.470264	2.20146	0	922	446	MME CLIC4 CYBB DCN MAN2A1 TGFBI SFRP1 APOE CLMP TGFBR2 LOX PPARG C3 KIT RHOJ PIK3C2A PDGFRA LEPR PTGIS SGPL1 PARVA MAGED1 FAM129B HEG1 EPCAM ITGA6 ANXA1 SFRP2 COMP CYP1B1 GPC3 PDGFC SFRP5 AKT1 GPNMB RARRES2 CTSH LIPA FZD1 NEDD4 LUZP1 ST14 C1GALT1 RECK ESR1 MET SEMA4A PRKX CAV1 ENPEP ADAMTS12 C6 NTRK2 TNC GRN PECAM1 CSF1R MMP14 PDE3B TNS3 MAN1A2 VAV2 ENPP2 THBS4 CMA1 SULF1 THBS2 HSD11B1 SPRED1 PIK…
REGULATION_OF_RAS_PROTEIN_SIGNAL_TRANSDUCTION	0.0015528	0.0135741	0.470257	1.96463	0	217	104	APOE TIMP2 MAP4K4 HEG1 SH2B2 RASA3 EPS8 IGF1 MET PLCE1 LPAR1 ARHGDIA LYN VAV2 F2R CYTH3 PLEKHG1 ARHGEF3 ABCA1 PREX1 ARHGEF28 RALGPS2 CYTH4 ARHGDIB F2RL1 APOA1 NET1 CBL DLC1 CSF1 EPHB2 FGD3 ARRB1 ITSN2 ARHGEF37 ARHGEF19 VAV1 PSD4 ROBO1 FGD6 IQSEC2 IRS2 PREX2 BCR P2RY10 ARHGEF16 NOTCH2 SHC1 JAK2 OPHN1 ARHGAP42 GPR65 FGF10 APOC3 FARP1 ARHGEF12 CADM4 RASGRP1 SPATA13 CDC42SE2 GPR174 NGEF MYOC AUTS2 EP…
RESPONSE_TO_BIOTIC_STIMULUS	0.0013459	0.0135741	0.469674	2.17415	0	737	335	DCN AXL IFITM2 CXCL9 CD68 IFNGR1 C3 MRC1 CSF2RB B2M TRIM44 TLR8 MPEG1 GPC3 ISG20 AKT1 RARRES2 SCN7A UNC93B1 CLDN1 TLR7 CCR5 FCER1G PLAC8 LITAF CAV1 TNFRSF1B CCL8 IRF4 TNFRSF1A GRN DCLK1 LYN RNF125 WIPF1 NPC2 F2R COTL1 PTAFR DHX9 PYGL IL17RC CFL1 CLEC7A FCGR2B IFITM3 SELP TLR4 CD180 LY86 C4B PENK IFIT2 RSAD2 VIM ACTA2 TLR5 ABCA1 PLCG2 IRF5 SMO GNG12 ADAM15 TGFB1 ADIPOQ SIRPA ACP5 IRF7 PTPN22 LGALS…
WOUND_HEALING	0.00140449	0.0135741	0.469654	2.11324	0	478	219	MMRN1 DCN CSRP1 AXL APOE DSP FBLN1 TGFBR2 LOX GAS6 PROS1 ANXA8 SERPING1 PDGFRA MYOF DOCK11 MERTK CD109 CD44 SH2B2 ANXA1 COMP ENTPD1 PAPSS2 POSTN CLIC1 GNG2 IGF1 FCER1G PLAT CAV1 TNC PECAM1 GNB1 LYN VAV2 MAP3K5 CD9 F2R FYN F13A1 P2RX4 PIK3CG PTK7 APOD HPSE ANXA5 PRKCB SELP TLR4 PRKAR2B FERMT3 PLCG2 ADTRP JMJD1C ADAM15 TGFB1 GNA13 PRCP THBS1 ANXA2 CORO1B GNA12 EGFR GSN CELSR1 MAFF SLC11A1 F2RL1 SYK…
RESPONSE_TO_VITAMIN	0.00157729	0.0135741	0.469198	1.7429	0	87	34	SFRP1 PPARG GAS6 CCND1 POSTN BCHE TNC FOLR2 PENK TGFB1 EGFR GSN VDR CAT ITGA2 STC1 ALDH1A2 TYMS TSPO PTN CD4 ADA BRIP1 ARG1 CASR BMP7 CD40 AQP3 LRAT RELA FES EEF2 TRIM25 ATP2B1
IMPORT_INTO_CELL	0.00138122	0.0135741	0.468423	2.14061	0	621	281	APOC1 AXL APOE ACTN4 TGFBR2 PPARG C3 MRC1 RHOJ ALB PIK3C2A GPM6B SCARA3 TINAGL1 SORT1 B2M GPC3 SLC1A3 AKT1 COLEC12 RGS2 MCTP1 NCKAP1L ARL6IP1 ITGAM NEDD4 FCER1G APP CAV1 LGALS3BP SLC36A4 HSP90B1 ITGA4 RAB31 WIPF1 CD9 ENPP2 SLC38A1 DAB2 FYN CAP1 STON1 SLC27A2 SIGLEC1 PIK3CG CD163 AHSG FOLR2 RAB34 GAK CLEC7A FCGR2B ENPP3 EZR RIN2 MASP1 ABCA1 ITGB2 PLCG2 KCNJ15 CD300A THBS1 ATP1A3 APOBR ANXA2 ACSL1 …
CARTILAGE_DEVELOPMENT	0.00156986	0.0135741	0.468412	1.94075	0	191	85	TGFBI SULF2 POR COL14A1 TGFBR2 SCARA3 CD44 SFRP2 COMP COL12A1 CHST11 ADAMTS12 EFEMP1 SULF1 SMPD3 VIT LUM MATN2 TGFB1 ANXA2 EIF2AK3 OSR1 ATP7A CHI3L1 GLG1 SHOX2 MGP LOXL2 BMP3 ECM1 MAPK3 TRPV4 STC1 WNT7B GLI3 EDN1 ZMPSTE24 TYMS RUNX3 WNT2B ACVRL1 GDF5 THBS3 LRP6 ITGB8 HAND2 BMPR2 BBS2 HIF1A COCH SMAD3 CHSY1 ROR2 COL11A1 BMP7 IFT80 COL27A1 MSX2 ZEB1 OSR2 FGFR3 HOXA11 IHH RELA BMP5 BMPR1B HYAL1 TRIP…
REGULATION_OF_LIPID_KINASE_ACTIVITY	0.00492611	0.0270265	0.468231	1.61502	2	58	33	KIT PDGFRA LYN VAV2 TGFB1 PIK3R5 PPP2R5A RB1 FGR PTK2B RBL1 P2RY12 WDR91 FLT3 SOCS3 CD81 F2 TEK SOCS1 FGFR3 FPR2 CISH SRC FGF2 KLF4 TNFAIP8L3 CCL19 PRKD1 CD19 SOCS6 VAV3 RBL2 PIK3R2
CELLULAR_RESPONSE_TO_NUTRIENT	0.00492611	0.0270265	0.468133	1.64501	2	64	21	CYBB SFRP1 PPARG GAS6 POSTN TNC HSP90B1 FYN P2RX4 FOLR2 PENK P2RX7 VDR P2RY12 TNKS BCL11A CYBA PTN BRIP1 HMOX1 CASR
METANEPHROS_DEVELOPMENT	0.00315457	0.0202312	0.467918	1.73441	1	86	40	PDGFRA GPC3 CTSH ITGA8 BASP1 PKD2 SMO ADIPOQ OSR1 CD34 WT1 WWTR1 EGR1 STAT1 NIPBL MYC ID2 WNT7B GLI3 CALB1 BCL2 FGF10 IRX1 FRAS1 PTCH1 IRX2 SALL1 DLG5 PAX2 BMP7 RET FMN1 TCF21 OSR2 HOXA11 GDNF CXCR2 CITED1 GATA3 GREM1
MUSCLE_CELL_MIGRATION	0.00325203	0.0202312	0.467841	1.6995	1	79	35	NOX4 IGFBP3 PARVA ANXA1 POSTN IQGAP1 IGF1 PLAT LPAR1 ACE THBS4 DOCK5 SMO ADIPOQ DOCK7 CORO1B ATP7A ARPC5 NET1 ITGA2 CCL5 BCL2 SLIT2 IGFBP5 ROCK1 PLXNA1 PDGFD ITGB3 PPARGC1A NFE2L2 HDAC4 NR4A3 MYOCD SRC AGT
CONNECTIVE_TISSUE_DEVELOPMENT	0.00150602	0.0135741	0.467544	1.97841	0	246	111	TGFBI SULF2 POR COL14A1 TGFBR2 LOX SCARA3 SH3PXD2B CD44 AACS SFRP2 COMP COL12A1 CHST11 ADAMTS12 EFEMP1 SPTLC2 SULF1 SMPD3 VIT ARID5B TNMD LUM MATN2 ACTA2 TGFB1 ANXA2 EIF2AK3 OSR1 ATP7A CD34 CHI3L1 WT1 GLG1 SHOX2 MGP LOXL2 BMP3 CSF1 EGR1 ECM1 MAPK3 TRPV4 STC1 ID2 WNT7B GLI3 EBF2 EDN1 ZMPSTE24 TYMS RUNX3 WNT2B ACVRL1 GDF5 THBS3 LRP6 ITGB8 HAND2 BMPR2 BBS2 CFLAR HIF1A COCH GDF7 PDGFD SMAD3 CHSY1 ROR…
REGULATION_OF_T_CELL_DIFFERENTIATION	0.0015528	0.0135741	0.467373	1.82775	0	122	69	TGFBR2 IL1RL2 ANXA1 NCKAP1L IRF4 CD74 TGFB1 PRELID1 CARD11 DTX1 LGALS9 SASH3 SYK CD83 SPINK5 PTPRC PNP ADAM8 VNN1 GLI3 AP3B1 RUNX3 IL7R IL7 CD86 IL2RA LILRB4 RHOA CD2 SH3RF1 LOXL3 BRAF ADA RASGRP1 RUNX1 MALT1 IRF1 CCR2 ZMIZ1 SOCS1 ZEB1 IHH IL18 NFKBID PRKCZ GATA3 EGR3 PRDM1 CD27 IL12RB1 CCL19 MYB TBX21 GLI2 ZAP70 AP3D1 ITPKB RIPK2 XBP1 CTLA4 TNFRSF18 ZC3H12A FOXJ1 TESPA1 CD80 NFKBIZ IL23R FANCA F…
REGULATION_OF_LYMPHOCYTE_MEDIATED_IMMUNITY	0.0016	0.0135741	0.467343	1.79166	0	109	41	C3 B2M FCER1G IL1R1 TNFRSF1B FCGR2B RSAD2 TGFB1 LGALS9 SASH3 HPX P2RX7 PTPRC PTPN6 CEACAM1 BTK VAV1 MSH6 WAS IL7R KLRK1 LAG3 SERPINB9 RASGRP1 HAVCR2 ARG1 AP1G1 SLAMF6 RIPK3 TNF IL18R1 MALT1 CCR2 CD40 IL27RA STAT6 CD226 CD96 IL18 PRKCZ GATA3
BRANCHING_MORPHOGENESIS_OF_AN_EPITHELIAL_TUBE	0.00156986	0.0135741	0.467277	1.85573	0	145	62	CLIC4 TGFBR2 MAGED1 SFRP2 GPC3 CTSH ESR1 MET TNC MMP14 PKD2 SMO TACSTD2 TGFB1 GNA13 PBX1 CELSR1 VDR WT1 FGFR2 PGR CSF1 SEMA3E EDNRA MYC GLI3 EDN1 WNT2B WNT2 LRP6 BCL2 SLIT2 STK4 FGF10 ESRP2 PTCH1 GDF7 SALL1 DLG5 TNF PAX2 VANGL2 AREG CASR BMP7 WNT6 KRAS TCF21 MSX2 PML CTSZ HOXA11 NPNT ENG DCHS1 GDNF SRC IHH CITED1 AGT GREM1 FGF2
CELLULAR_RESPONSE_TO_AMMONIUM_ION	0.00656814	0.0333622	0.467112	1.60375	3	56	26	PLCB1 GNB1 PTAFR GNAI2 LRRK2 CCNA2 CASP3 MAPK3 CASP6 PPP1R9B AIF1 RGS10 GNA15 CHRNA4 KCNC2 GABPA CASP7 CDK5R1 CHRM3 GABRB3 GNAQ ID1 SIN3A DNM2 LY6G6D CHRM2
RHO_PROTEIN_SIGNAL_TRANSDUCTION	0.00154321	0.0135741	0.466281	1.93184	0	185	95	APOE RHOJ HEG1 EPS8 MET LPAR1 ARHGDIA PECAM1 VAV2 F2R PLEKHG1 CFL1 NTN1 ARHGEF3 ABCA1 PREX1 GNA13 ARHGEF28 GNA12 CELSR1 ARHGAP29 ARHGDIB F2RL1 APOA1 ARHGAP1 NET1 RAC2 DLC1 PDPN NGFR FGD3 ARRB1 ITSN2 ARHGEF37 ARHGEF19 CDC42EP4 VAV1 ROBO1 FGD6 WAS PREX2 BCR LIMK1 P2RY10 ARHGEF16 OPHN1 ARHGAP42 GPR65 ARHGAP5 RHOA APOC3 FARP1 ARHGEF12 ROCK1 SPATA13 CDC42SE2 GPR174 NGEF MYOC ARHGAP4 VANGL2 EPS8L2 LPAR…
EPIDERMAL_GROWTH_FACTOR_RECEPTOR_SIGNALING_PATHWAY	0.00158479	0.0135741	0.466255	1.77947	0	104	43	PTPRJ PIK3C2A RASSF2 AKT1 IQGAP1 NCF1 REPS2 EPS8 APP PLCE1 EFEMP1 ARF4 PIGR TGFA ITGA1 TGFB1 EGFR PSEN1 CBL GRB7 CEACAM1 PTK2B BTC AFAP1L2 PTPN12 DGKD SHC1 ERRFI1 PTPN11 AREG ARAP1 PLAUR DOK1 SRC HAP1 AGT SH3GL2 SOCS4 CBLC MMP9 ADAM17 GAB1 GPRC5A
LOCOMOTION	0.00119617	0.0135741	0.466218	2.23997	0	1517	651	CLIC4 DCN NTN4 SFRP1 AXL CXCL9 APOE ACTN4 LIMA1 FBLN1 PTPRJ MYO5A TGFBR2 LOX ARSB NOX4 PPARG KIT IGFBP3 PLCB1 RHOJ GAS6 PROS1 PIK3C2A FLRT2 DDR2 MSN LAMB1 PDGFRA MAP4K4 SGPL1 PARVA FAM129B EMB MERTK EPCAM CD44 ITGA6 ANXA1 GPC6 SFRP2 CTNNA1 SEMA3D CYP1B1 GPC3 ADCY3 ABHD2 SLIT3 POSTN DPP4 PDGFC AKT1 IQGAP1 MCTP1 DPYSL3 ALCAM NCKAP1 GPNMB RARRES2 CTSH ITGBL1 NCKAP1L ITGAM EPS8 GCNT1 NEDD4 IGF1 RECK …
CARBOHYDRATE_TRANSPORT	0.00155521	0.0135741	0.466178	1.81749	0	121	44	C3 SORT1 GPC3 AKT1 IGF1 PRKCI SMPD3 PRKCB EZR PID1 ADIPOQ SLC35A3 RNASEL FABP5 MEF2A ENPP1 SLC37A2 MFSD2A ADIPOR2 EDNRA SLC35B4 SLC2A5 FFAR4 SORBS1 EDN1 IRS2 SLC2A3 PLS1 BRAF MFSD12 SLC23A2 GRB10 PTPN11 SLC35A5 TNF NFE2L2 SLC23A1 SLC2A1 NR4A3 PRKAG2 SLC17A5 AQP3 SLC2A9 SESN2
REGULATION_OF_LEUKOCYTE_DIFFERENTIATION	0.00152439	0.0135741	0.466137	1.96758	0	240	108	SFRP1 AXL TGFBR2 GAS6 IL1RL2 RASSF2 ANXA1 TMEM176B NCKAP1L CCR1 IRF4 RIPK1 TYROBP LYN C1QC MMP14 FCGR2B TLR4 TMEM176A CD74 TGFB1 ADIPOQ PRELID1 CARD11 IRF7 NFAM1 INPP5D DTX1 LGALS9 CASP8 SASH3 SYK HCLS1 CD83 LRRC17 TLR9 ZFP36L2 LILRB3 IKZF3 RB1 SPINK5 PTPRC TLR3 PTPN6 CSF1 PNP ADAM8 CEACAM1 BTK SLAMF8 TAL1 PF4 VNN1 ATP11C MYC ID2 ZFP36L1 CREB1 GLI3 AP3B1 EVI2B RUNX3 IL7R NOTCH2 IL7 CD86 IL2RA LIL…
RESPONSE_TO_ANTINEOPLASTIC_AGENT	0.00315457	0.0202312	0.466093	1.72764	1	86	38	CTNNA1 CLDN1 ASNS PTAFR SERPINF1 ADAM10 CDH1 ADAM15 TGFB1 XRN1 EGFR NUCB1 PCK1 EGR1 MAP4K1 EIF4EBP1 EDN1 ATRX MAPK13 ICAM1 CFLAR ERRFI1 KAT7 HMOX1 USP8 FOXO3 ARG1 CPS1 FMR1 BRCA1 PCK2 NR3C1 CDK4 BLM GJB2 GBA SRD5A1 RAD51
NEGATIVE_REGULATION_OF_EPITHELIAL_CELL_PROLIFERATION	0.00156986	0.0135741	0.46603	1.79329	0	110	43	SFRP1 APOE PPARG MAGED1 CD109 SFRP2 GPC3 CAV1 SULF1 SERPINF1 TNMD TGFB1 THBS1 PTPRM MTSS1 VDR RB1 FGFR2 CEACAM1 CASK NGFR STAT1 ROBO1 MEN1 CAV2 RUNX3 ACVRL1 GDF5 PTN PTPRK CDKN1C PTCH1 EPPK1 TNF CCL2 IFT80 TGFBR3 MCC PTEN RGN ATF2 MARVELD3 GATA3
REGULATION_OF_LIPID_TRANSPORT	0.0015949	0.0135741	0.465191	1.72946	0	90	32	APOC1 APOE PPARG TTC39B AKT1 P2RX4 ABCA1 ADIPOQ PRELID1 THBS1 ANXA2 PLTP SYK APOA1 P2RX7 RETN SREBF2 C1QTNF1 LIPG PON1 EDN1 IRS2 APOA2 TSPO ABCG1 NFKB1 APOC3 ABCA12 PTCH1 HNRNPK ITGB3 PTPN11
PROTEIN_KINASE_B_SIGNALING	0.0015528	0.0135741	0.464571	1.94087	0	217	93	AXL PTPRJ LOX NOX4 KIT GAS6 PDGFRA MERTK SFRP5 AKT1 IGF1 ESR1 MET PIK3AP1 NTRK2 GCNT2 FYN P2RX4 PIK3CG KLB SMPD3 HPSE TGFA ADTRP TGFB1 THBS1 SEMA5A EGFR PIK3R5 HCLS1 RCN3 CHI3L1 RAC2 CX3CL1 HGF C1QTNF1 FGFR2 MFHAS1 BAG4 ADAM8 BTC SESN3 ZFP36L1 CCL5 VAV1 NRG4 P2RY12 IRS2 BANK1 RRAS ERBB3 CD86 PHLPP2 FGF10 MST1R IGFBP5 STK3 F3 LCK PTPN11 MYOC TNF PAX2 AREG TYRO3 RET CCL2 TEK CD40 FAM110C SESN2 FGF7…
WATER_HOMEOSTASIS	0.00653595	0.0333622	0.464327	1.60866	3	59	26	ADCY3 CLDN1 MET PRKAR2B MYO5B CLDN4 SCNN1A ADCY7 KRT1 TRPV4 GRHL1 FA2H RAB11FIP2 ABCA12 ADCY5 ADCY1 AQP3 PRKAR1B FLG2 GBA ACER1 ATP6V1B1 STMN1 GRHL3 SFN TFAP2B
G_PROTEIN_COUPLED_RECEPTOR_SIGNALING_PATHWAY_COUPLED_TO_CYCLIC_NUCLEOTIDE_SECOND_MESSENGER	0.00156495	0.0135741	0.463479	1.90463	0	180	75	CXCL9 ANXA1 MRAP ADCY3 RGS2 GNG2 CCR1 LPAR1 GNB1 GNAI3 PSAPL1 ABCA1 TSHR PTGER3 GNA13 GNA12 PTGFR ATP2B4 GNAI2 ADORA2B ADM S1PR1 ADCY7 PF4 EDNRA CALCRL GNAL P2RY12 EDN1 PTGER2 LPAR3 WASF2 FLNA GPR65 MC5R AKAP12 NPY1R GNAI1 MC2R GRK5 CASR CNR2 HRH2 CCL2 ADCY5 GPR161 ADCY1 ARRDC3 CACNA1D CNR1 FPR2 SLC9A3R1 ADRA2C AGT AKAP13 ADRB3 PTH1R GNA15 PTGER4 MARCO SSTR4 XCR1 RXFP1 ADORA2A ADRA1A FPR1 RAPGEF2…
POSITIVE_REGULATION_OF_ENDOTHELIAL_CELL_MIGRATION	0.0015949	0.0135741	0.463472	1.72307	0	90	56	RHOJ PIK3C2A ANXA1 AKT1 MET GRN P2RX4 SP1 TGFB1 LGMN THBS1 SEMA5A PTK2B CALR EDN1 NRP2 AKT3 BMPR2 HIF1A FLT4 MAP3K3 HMOX1 ITGB3 NFE2L2 SASH1 TEK CD40 HDAC9 AGT GATA3 FGF2 FOXP1 ANGPT4 NOS3 PROX1 PRKD1 ADAM17 FGF16 ANXA3 KDR FOXC2 GATA2 VEGFC RHOB SPARC PLCG1 ZC3H12A PRKD2 PDPK1 ATOH8 WNT7A NRP1 WNT5A FGFR1 ETS1 SIRT1
L_AMINO_ACID_TRANSPORT	0.00660066	0.0333622	0.463255	1.61539	3	61	19	SLC1A3 RGS2 ARL6IP1 SLC36A4 SLC38A1 SLC43A2 SFXN1 SLC36A2 SLC7A1 SLC11A1 PSEN1 SLC7A11 SLC7A10 SLC3A2 SLC7A5 SLC1A4 SLC43A1 SLC1A5 ARG1
EXOCYTOSIS	0.00132626	0.0135741	0.463118	2.15279	0	798	311	FGL2 MMRN1 MME CYBB ACTN4 DSP TIMP2 CD68 PTPRJ MYO5A EEF1A1 ARSB C3 KIT GNS GAS6 PROS1 ALB PIK3C2A SERPING1 GM2A CD109 CD44 B2M ACTN1 ANXA1 RAB8B VAT1 ENDOD1 PYGB IQGAP1 PGRMC1 ASAH1 RARRES2 CTSH NCKAP1L ITGAM SCRN1 IGF1 CTSC CCR1 IQGAP2 CMTM6 CTSB FCER1G APP PLAC8 LGALS3BP TNFRSF1B CCL8 GRN PECAM1 TYROBP LYN PCDH7 RAB31 SRGN CADPS2 CD33 ACPP NPC2 CD9 ACLY APBA1 CAP1 QPCT COTL1 PIGR SLC27A2 F13A1…
NEGATIVE_REGULATION_OF_PEPTIDE_SECRETION	0.00156986	0.0135741	0.462992	1.7816	0	110	37	SFRP1 GAS6 UCP2 MAP4K4 ANXA1 TLR8 SRGN F2R FCGR2B ANXA5 EZR RSAD2 CD74 ADTRP PTPN22 F2RL1 APOA1 GBP1 CD34 RAB11FIP1 TNFAIP3 CX3CL1 HMGCR PFKL C1QTNF3 FFAR4 CD200R1 ACVR1C IL1R2 FN1 INHBB BANK1 APOA2 CIDEA IL33 PTPN11 TNF
GLYCEROLIPID_CATABOLIC_PROCESS	0.00821018	0.0396421	0.462981	1.58956	4	56	21	APOC1 APOE ABHD2 MGLL LIPE PLA2G4A ENPP2 PIK3CG PNPLA2 FABP5 APOA1 APOB FABP1 APOA2 ABHD12 APOC3 ENPP6 CPS1 FABP4 PLA2G15 LDLR
PRODUCTION_OF_MOLECULAR_MEDIATOR_OF_IMMUNE_RESPONSE	0.00152672	0.0135741	0.462658	1.87698	0	164	70	KIT GAS6 B2M FCER1G IL1R1 TNFRSF1B FCGR2B TLR4 RSAD2 SWAP70 CD74 TGFB1 CARD11 SASH3 SLC11A1 HPX F2RL1 APOA1 IRAK3 TLR9 SPINK5 BST2 PTPRC DDX58 TLR3 SAMHD1 GPRC5B BTK KLK7 MAPK3 TNFSF13B TNFRSF14 MSH6 RBP4 IL7R HK1 APOA2 IL13RA2 CD36 IL33 HMOX1 ARG1 TNF IL18R1 MALT1 CCR2 DDX21 CD40 NR4A3 IL27RA STAT6 CD226 CD96 CCR6 IL18 FFAR2 PRKCZ GATA3 TLR2 GALNT2 CD22 MR1 POLQ POU2F2 MZB1 TRAF6 TRIL SEMA7A TBX…
ORGAN_GROWTH	0.00153139	0.0135741	0.462468	1.88058	0	166	78	POR COL14A1 TGFBR2 DDR2 SCARA3 LEPR HEG1 COMP COL12A1 AKT1 RGS2 IGF1 ESR1 CXADR RIPK1 WWC1 SMPD3 VIT BASP1 MATN2 PSAPL1 SMO KCNK2 ANXA2 SASH3 WT1 SLC6A4 FGFR2 S1PR1 LATS2 ECM1 WWC2 RBPJ SERP1 STC1 RBP4 EDN1 ZMPSTE24 GATA6 IL7 MAPK11 WNT2 THBS3 BCL2 STK4 FGF10 COCH STK3 TENM4 PTPN11 ZFPM2 CCNB1 BCL2L11 COL27A1 MSX2 TGFBR3 FGF7 FGFR3 ERBB4 PTEN AGT AKAP13 FGF2 VWA1 LATS1 ARID2 PROX1 NDRG4 MATN4 MBL…
LYMPHOCYTE_HOMEOSTASIS	0.00660066	0.0333622	0.462292	1.61203	3	61	24	DOCK11 SH2B2 AKT1 NCKAP1L LYN CD74 TGFB1 DOCK10 TNFRSF13C LGALS9 P2RX7 TNFAIP3 CASP3 TNFSF13B IL2RA BCL2 HIF1A ADA SKIL GPR174 RIPK3 BCL2L11 CORO1A PMAIP1
ALCOHOL_BIOSYNTHETIC_PROCESS	0.00154321	0.0135741	0.462098	1.8573	0	152	69	APOE POR PLCB1 ASAH1 SRD5A3 ACACA ASAH2 PLCE1 ADCYAP1R1 SPTLC2 ACLY DHCR24 PTAFR ACER2 PLCG2 HMGCS2 SP1 MOXD1 CYB5R3 APOA1 PCK1 SQLE VDR SREBF2 HMGCR ELOVL6 APOB EPHX1 PLCB3 FASN PTK2B ISYNA1 PLCB4 ERLIN2 PLEK ACER3 ABCG1 NFKB1 KPNB1 MBTPS1 NFYA SCAP ERLIN1 PPIP5K2 TNF PCK2 INSIG1 GFI1 SPTLC1 SPHK1 SEC14L2 BMP5 ACAT2 PTH1R FGF2 GBA ACER1 ITPKA PLCD3 IDI1 P2RY6 LSS NSDHL PLCB2 GCH1 PRKAA1 ITPKC IT…
CARDIOVASCULAR_SYSTEM_DEVELOPMENT	0.00136612	0.0135741	0.461984	2.1186	0	637	295	CLIC4 CYBB DCN TGFBI SFRP1 APOE TGFBR2 LOX PPARG C3 KIT RHOJ PIK3C2A PDGFRA LEPR PTGIS SGPL1 PARVA FAM129B HEG1 ANXA1 SFRP2 COMP CYP1B1 GPC3 AKT1 ANTXR1 GPNMB CTSH NEDD4 LUZP1 C1GALT1 RECK SEMA4A PRKX CAV1 ENPEP C6 NTRK2 GRN PECAM1 MMP14 PDE3B VAV2 ENPP2 THBS4 CMA1 SULF1 THBS2 SPRED1 PIK3CG PTK7 SERPINF1 ANPEP APOD TNMD HPSE C3AR1 PRKCB PKD2 ACTA2 ADAM12 ITGB2 SMO SOX4 ADTRP SP1 ADAM15 TGFB1 GNA1…
EMBRYONIC_PLACENTA_DEVELOPMENT	0.00324675	0.0202312	0.461708	1.68542	1	82	38	AKT1 ST14 KRT19 PKD2 EGFR CASP8 E2F8 CEBPA ADM FGFR2 JUNB RBPJ ZFP36L1 WNT7B RSPO3 SPINT1 SPINT2 WNT2 KRT8 STK4 CDKN1C GRHL2 SOCS3 HIF1A STK3 EOMES BMP7 FBXW8 SP3 SETD2 PLK4 IGF2 BMP5 CITED1 PRDM1 TTPA VASH2 PLCD3
LIPID_LOCALIZATION	0.00147493	0.0135741	0.46162	2.01823	0	333	163	APOC1 APOE LIMA1 PPARG C3 ABCA9 GM2A TTC39B ANXA1 SLCO2A1 NRIP1 BSCL2 AKT1 ATP8B1 ACACA CAV1 ACE CPT1A PLA2G4A SOAT1 STARD5 NPC2 GLTP SLC27A2 P2RX4 PLA2G2D APOD PROCA1 DGAT1 PNPLA2 ATP10A ABCA1 ABCC1 ADIPOQ PRELID1 THBS1 APOBR ANXA2 ACSL1 PITPNM1 PLTP SYK APOA1 P2RX7 STRA6 RETN SREBF2 MSR1 ESYT1 ATP10B ENPP1 C1QTNF1 LBP MFSD2A LIPG SIGMAR1 APOB HEXB CEACAM1 PLIN2 FABP1 SLCO2B1 PON1 ATP11C EHD1 ST…
PATTERN_RECOGNITION_RECEPTOR_SIGNALING_PATHWAY	0.00154083	0.0135741	0.461443	1.88409	0	171	84	XIAP TLR8 COLEC12 ITGAM UNC93B1 ESR1 TLR7 CTSB CAV1 PIK3AP1 IRF4 RIPK1 HSP90B1 LYN RNF125 CLEC7A CTSS TLR4 RSAD2 TLR5 ITGB2 LGMN CD300A IRF7 PTPN22 CASP8 F2RL1 IRAK3 TICAM2 RPS6KA3 TLR9 IFIH1 TNFAIP3 CD14 TMEM173 DDX58 TLR3 LBP FGB FGA MFHAS1 IRAK2 APOB BTK CD300LF TIFA FGG CNPY3 IRAK4 S100A14 CYBA GRAMD4 CD36 TLR1 TAB3 ZCCHC3 HAVCR2 ITCH TYRO3 IRF1 LTF ALPK1 DDX60 GFI1 PGLYRP2 CTSL RELA DHX58 FF…
PEPTIDYL_TYROSINE_MODIFICATION	0.00148588	0.0135741	0.461344	2.01246	0	327	131	SFRP1 AXL PTPRJ NOX4 KIT GAS6 DDR2 PDGFRA MERTK CD44 IL6ST SFRP2 PDGFC IQGAP1 NCF1 IGF1 MET APP CAV1 NTRK2 TNFRSF1A ACE PECAM1 LYN EFEMP1 CSF1R ENPP2 THBS4 FYN SLA PRLR TGFA ITGB2 CD74 TGFB1 ADIPOQ CD300A HCK BST1 EGFR PARP14 HPX SYK HCLS1 RAP2B PSEN1 PTPRC CBL HGF LRRK1 CSK FGFR2 RELN SAMSN1 PTPN6 WEE1 PAK2 EPHB2 GPRC5B BTK FGR TAL1 PARP9 MAPK3 PTK2B THY1 EHD4 NCAPG2 STAP1 AFAP1L2 CAMKK2 TNFRSF1…
INNATE_IMMUNE_RESPONSE	0.00136986	0.0135741	0.460643	2.12022	0	687	313	CFH CYBB AXL IFITM2 APOE IFNGR1 PPARG C3 MRC1 C2 XIAP SERPING1 CFB IL1RL2 SCARA3 CD44 B2M ANXA1 TLR8 ZBP1 C1S ISG20 COLEC12 NCF1 C1QB RARRES2 ITGAM UNC93B1 CLDN1 ESR1 TLR7 CTSB FCER1G IRF6 APP CAV1 PIK3AP1 CCL8 C6 IRF4 RIPK1 GRN HSP90B1 TYROBP LYN C1QA CSF1R RNF125 MYO1C C1QC PSMB8 MAP3K5 FYN PTAFR PIK3CG TRIM29 DHX9 CLEC7A FCGR2B CTSS EVL IFITM3 FLNB TLR4 CD180 TRIM14 LY86 C4B ZYX IFIT2 RSAD2 MA…
REGULATION_OF_NEUROLOGICAL_SYSTEM_PROCESS	0.0015625	0.0135741	0.460509	1.7783	0	113	43	MGLL APP ACPP F2R PTAFR EIF2AK3 FABP5 AVPR1A HGF LRRK2 ABAT RELN PTK2B MYRF ITGA2 SHANK2 S1PR2 EDN1 EDNRB TENM4 S100B ZMYND8 WASF3 FMR1 STX1B IGSF9B SRC TMEM108 IGSF11 ADRA2C PTEN MTMR2 PRKCZ AGT NPTX1 NRXN1 TMEM100 GBA UNC13B SLC9A1 NOS3 FIG4 CACNB3
NEGATIVE_REGULATION_OF_CELL_MORPHOGENESIS_INVOLVED_IN_DIFFERENTIATION	0.0015949	0.0135741	0.460105	1.71055	0	90	28	ACTN4 FBLN1 SEMA3D POSTN SEMA4A ARHGDIA SEMA3F SEMA3A NTN1 TACSTD2 SEMA5A GBP1 CORO1C PSEN1 EPHB2 SEMA3E NGFR THY1 SEMA3G SEMA4B SLIT2 RHOA EFNB3 EFNA5 SEMA3C RCC2 NGEF ARHGAP4
REGULATION_OF_OSSIFICATION	0.00154083	0.0135741	0.460047	1.87839	0	171	79	SFRP1 GPM6B DDR2 RASSF2 IL6ST SFRP2 COMP OMD CLIC1 GDF10 IGF1 CCR1 SMOC1 SRGN TWSG1 AHSG TGFB1 PBX1 OSR1 P2RX7 CEBPA MGP HGF ENPP1 FGFR2 S1PR1 CSF1 ECM1 IFITM1 MAPK3 RBPJ PTK2B NIPBL ID2 WNT7B GLI3 TPH1 MEN1 ANO6 ZMPSTE24 FBN2 TMEM119 SUCO BCL2 HAND2 BMPR2 IGFBP5 ZHX3 HIF1A PTCH1 SMAD3 CHSY1 TNF AREG HDAC4 TWIST2 BMP7 CEBPD LTF MSX2 EGR2 TXLNG OSR2 NPNT BMPR1B SKI SMURF1 CITED1 TFAP2A GDPD2 GREM1…
ENDODERM_DEVELOPMENT	0.00328407	0.0202312	0.459922	1.62926	1	69	32	LAMB1 COL12A1 ITGA4 MMP14 ITGB2 TGFB1 EXT1 MMP2 ZFP36L1 FN1 GATA6 MMP15 HDAC1 SMAD3 COL11A1 EOMES SETD2 COL5A2 LAMA3 COL8A1 HMGA2 MMP8 SOX17 MMP9 LAMC1 COL6A1 NOTCH1 HNF1B LAMB3 BPTF INHBA SMAD4
MAMMARY_GLAND_DEVELOPMENT	0.00155521	0.0135741	0.459636	1.8068	0	128	58	TGFBR2 CCND1 AKT1 ESR1 IRF6 CAV1 CSF1R PAM CDO1 PRLR NTN1 OXTR SMO TGFB1 ATP7A VDR FGFR2 PGR CSF1 FASN ITGA2 ID2 WNT7B CREB1 GLI3 TPH1 ROBO1 IRS2 SERPINC1 JAK2 WNT2 APLN LRP6 ARHGAP5 FGF10 ELF5 IGFBP5 HIF1A LBH PTCH1 ARG1 SOSTDC1 BCL2L11 AREG ELF3 CSN3 MSX2 UPRT PML STAT6 ERBB4 SRC GATA3 CAD KDM5B OAS2 LATS1 HOXB9
POSITIVE_REGULATION_OF_GTPASE_ACTIVITY	0.00144718	0.0135741	0.459606	2.01347	0	344	178	FAM13A SFRP1 PLCB1 MAP4K4 DOCK11 TBC1D9 ITGA6 RASA3 IQGAP1 RGS2 NCKAP1L CCL8 ASAP1 TBC1D2B ARHGDIA SRGAP1 F2R USP6NL ARAP2 SRGAP3 RGS5 RIN2 SYDE2 PREX1 DOCK7 DOCK10 RACGAP1 TBC1D20 ACAP2 ARHGAP29 ARHGDIB RSU1 RGS16 F2RL1 RALGAPA2 ARHGAP32 ARHGAP1 NET1 CORO1C CX3CL1 MYO9A ARFGAP3 DOCK2 LRRK2 DLC1 S1PR1 ARHGAP25 RAPGEF6 PKP4 ARHGAP9 SEC23B PICALM ARRB1 PLXNB1 PTK2B THY1 RABGAP1L ARHGAP31 ARHGAP26 C…
ORGANIC_HYDROXY_COMPOUND_TRANSPORT	0.00153139	0.0135741	0.459338	1.91669	0	206	92	APOC1 APOE LIMA1 PPARG GPM6B EMB TTC39B SLC16A7 ATP8B1 FCER1G CAV1 SOAT1 STARD5 NPC2 OXTR ABCA1 ADIPOQ ANXA2 PLTP SYK APOA1 STRA6 SREBF2 MSR1 ABAT C1QTNF1 PGAP1 SLC6A4 LIPG APOB CEACAM1 SLCO2B1 PON1 STARD4 NCOA2 ABCA5 OSBPL5 ABCC3 RBP4 P2RY12 SLC2A13 APOA2 CXCL12 TSPO MFSD10 KCNA2 ABCG1 RALBP1 NFKB1 LRP6 CD36 APOC3 OSBP2 ABCA12 PTCH1 SLC22A3 PTPN11 SLC10A6 AQP3 VPS4B LDLR CNR1 GDNF ADRA2C OSBPL10…
STEM_CELL_PROLIFERATION	0.00157233	0.0135741	0.459258	1.74795	0	102	40	FBLN1 EPCAM SFRP2 CTNNA1 ACE SMO TGFB1 DOCK7 RACGAP1 PLXNB2 CD34 PTPRC CX3CL1 LRRK2 FGFR2 ZFP36L1 ATXN1L WNT7B GLI3 FZD3 WNT2B FERMT1 EIF2AK2 HIF1A KCNA1 RUNX1 HMGB2 MECOM ETV6 CITED1 ZNRF3 FRS2 CX3CR1 FGF2 ID4 KCTD11 HMGA2 SOX5 ASPM SOX17
RESPONSE_TO_WOUNDING	0.00137741	0.0135741	0.459203	2.09227	0	581	258	MMRN1 DCN LYVE1 CSRP1 AXL APOE SULF2 DSP FBLN1 TGFBR2 LOX GAS6 PROS1 ANXA8 SERPING1 PDGFRA MYOF DOCK11 MERTK CD109 CD44 SH2B2 ANXA1 COMP CTNNA1 ENTPD1 PAPSS2 ABHD2 SLC1A3 POSTN CLIC1 DPYSL3 GNG2 IGF1 CCR1 FCER1G PLAT CAV1 PTPRF TNC GRN PECAM1 TYROBP GNB1 LYN VAV2 MAP3K5 CD9 F2R ARF4 FYN F13A1 P2RX4 PIK3CG PTK7 APOD HPSE ANXA5 PRKCB SELP MATN2 TLR4 PRKAR2B FERMT3 PLCG2 ADTRP JMJD1C ADAM15 TGFB1 GN…
REGULATION_OF_VASCULATURE_DEVELOPMENT	0.0015083	0.0135741	0.459099	1.97309	0	286	141	CYBB DCN SFRP1 TGFBR2 PPARG C3 KIT RHOJ PIK3C2A PTGIS FAM129B ANXA1 SFRP2 CYP1B1 GPNMB CTSH RECK SEMA4A C6 GRN PDE3B ENPP2 THBS4 CMA1 SULF1 THBS2 SPRED1 SERPINF1 TNMD C3AR1 PRKCB ADAM12 ITGB2 SP1 THBS1 SEMA5A EMP2 PTPRM CD34 ANGPT2 CHI3L1 TNFAIP3 SPINK5 ADM CX3CL1 WT1 HGF TLR3 PDCD4 EGR1 ECM1 CEACAM1 SEMA3E KRT1 NGFR PF4 PTK2B STAT1 ERAP1 CREB3L1 ISM1 ANGPTL4 STARD13 GATA6 RRAS STAT3 ACVRL1 HIPK1…
PRODUCTION_OF_MOLECULAR_MEDIATOR_INVOLVED_IN_INFLAMMATORY_RESPONSE	0.00656814	0.0333622	0.459055	1.58396	3	57	28	FCER1G GRN LYN ABCD2 APOD IL17RC TLR4 SIRPA PYCARD SYK ALOX5 LBP IL17RA PDCD4 ADCY7 BTK SLAMF8 IL1R2 CD36 GBP5 CD6 F2 CD96 IDO1 MYD88 NOS2 GPSM3 TLR6
NEGATIVE_REGULATION_OF_VASCULATURE_DEVELOPMENT	0.0015873	0.0135741	0.459032	1.75801	0	106	49	DCN PPARG FAM129B SEMA4A PDE3B THBS4 SULF1 THBS2 SPRED1 SERPINF1 TNMD THBS1 PTPRM ANGPT2 SPINK5 WT1 PDCD4 SEMA3E NGFR PF4 STAT1 CREB3L1 ISM1 STARD13 PTN RHOA ROCK1 DNMT1 BMP7 CCR2 TEK PML NFATC3 EFNA3 STAB1 ATF2 E2F2 AGT CX3CR1 HRG KLF4 ANGPT4 ADAMTS9 NPR1 XDH KLF2 NOTCH1 FOXC1 APOH
T_CELL_MEDIATED_IMMUNITY	0.00487013	0.0269121	0.458941	1.65497	2	75	32	B2M CTSH CTSC IL1R1 TNFRSF1B FCGR2B RSAD2 SASH3 SLC11A1 EMP2 P2RX7 PTPRC CEACAM1 WAS IL7R PRF1 ICAM1 ARG1 RIPK3 IL18R1 MALT1 CCR2 CD8A MYO1G IL18 PRKCZ GATA3 IL12RB1 TRAF6 TBX21 RAB27A IL20RB
RESPONSE_TO_KETONE	0.0015625	0.0135741	0.458498	1.87429	0	176	73	CYBB SFRP1 PPARG MSN CCND1 AACS ADCY3 ABHD2 SLIT3 AKT1 GNG2 CLDN1 ACACA CAV1 TNC GNB1 PTAFR SERPINF1 OXTR ADAM15 TGFB1 XRN1 IGFBP7 THBS1 PTGFR EGFR DSG2 PCK1 CBL AHR AVPR1A CLDN4 CD38 GLB1 MAP4K1 EIF4EBP1 NCOA2 CALR EDN1 PTGER2 TYMS TSPO CYBA PTN SLIT2 ICAM1 FOXP2 CFLAR ERRFI1 EFNA5 GNAI1 USP8 FOXO3 ARG1 CPS1 FOSB ADCY5 PCK2 NR3C1 ADCY1 TGFBR3 BCL2L1 SRC RELA CDK4 GJB2 TLR2 GBA KLF4 CAD ATP2B1 SR…
POSITIVE_REGULATION_OF_JNK_CASCADE	0.0015528	0.0135741	0.458078	1.7914	0	122	57	PLCB1 RASSF2 NCF1 APP RIPK1 MAP3K5 SEMA3A FCGR2B TLR4 ZEB2 MLKL F2RL1 PYCARD SYK TLR9 TLR3 MFHAS1 MAP4K1 TRPV4 PTK2B MDFIC WNT7B EDN1 MAPK8IP1 FZD10 FZD4 DBNL MAP3K9 SH3RF1 FLT4 SDCBP IL1RN STK3 RASGRP1 ERN1 MAP3K2 ROR2 TNF VANGL2 TNFRSF19 SASH1 PTPN1 TAOK3 TRAF4 MAP3K6 SH3RF2 SERPINF2 EPHA4 CD27 ARHGEF5 FGD2 HIPK2 TRAF6 CCL19 MMP8 TLR6 AXIN1
POSITIVE_REGULATION_OF_IMMUNE_SYSTEM_PROCESS	0.0012987	0.0135741	0.45799	2.14452	0	884	402	CFH AXL PTPRJ TGFBR2 C3 C2 GAS6 PROS1 XIAP SERPING1 CFB ARPC1B IL1RL2 SCARA3 B2M SH2B2 ANXA1 TLR8 IL6ST ZBP1 C1S DPP4 AKT1 COLEC12 C1QB NCKAP1 RARRES2 NCKAP1L ITGAM UNC93B1 IGF1 ESR1 CCR1 TLR7 CTSB FCER1G IL1R1 APP CAV1 PIK3AP1 CCL8 C6 CAMK1D IRF4 RIPK1 HSP90B1 TYROBP LYN ITGA4 C1QA RNF125 MYO1C C1QC STK39 PSMB8 MMP14 WIPF1 VAV2 THBS4 FYN PTAFR BTNL9 P2RX4 DHX9 ADAM10 CLEC7A FCGR2B CTSS C3AR1 ENP…
CELL_MORPHOGENESIS_INVOLVED_IN_DIFFERENTIATION	0.00135318	0.0135741	0.457827	2.10768	0	670	290	CLIC4 NTN4 AXL APOE ACTN4 COL14A1 FBLN1 FLRT2 CDH11 LAMB1 SCARA3 PARVA FAM129B EMB MERTK HEG1 CLDN3 ACTN1 COL12A1 SEMA3D SLIT3 SLC1A3 POSTN ANTXR1 ALCAM NEDD4 ST14 MET SEMA4A APP ARHGDIA NTRK2 PECAM1 CHL1 UST DCLK1 PTPRA ITGA4 CSF1R SEMA3F PTPRD FYN ITGA8 SEMA3A VIT TNMD DOCK5 ADAM10 GFRA1 CFL1 NTN1 EVL FLNB EZR MATN2 ZEB2 GAB2 FERMT3 SMO TACSTD2 SDC2 PLXNA4 EXT1 PREX1 DOCK7 DOCK10 SPG11 TBC1D20 …
ENDOTHELIAL_CELL_MIGRATION	0.00154799	0.0135741	0.457231	1.88959	0	184	94	DCN APOE PPARG RHOJ PIK3C2A ANXA1 CYP1B1 DPP4 AKT1 MET SEMA4A PRKX GRN PECAM1 SPRED1 P2RX4 SERPINF1 ITGB2 ADTRP SP1 TGFB1 LGMN PRCP THBS1 CORO1B SEMA5A EMP2 PTPRM APOA1 ANGPT2 LOXL2 CEACAM1 PTK2B STC1 ROBO1 CALR EDN1 STARD13 ACVRL1 NRP2 AKT3 SLIT2 BMPR2 RHOA HIF1A FLT4 MAP3K3 HMOX1 ITGB3 NFE2L2 SASH1 TEK CD40 HDAC9 MYH9 PTEN AGT ITGB1 SP100 GATA3 EGR3 GREM1 FGF2 HRG KLF4 FOXP1 ANGPT4 NOS3 ADAMTS9…
EYE_MORPHOGENESIS	0.00156006	0.0135741	0.456787	1.80273	0	134	72	MAN2A1 PRKCI NTRK2 EFEMP1 ALDH1A3 TBC1D20 PTPRM FAT1 STRA6 BCAR3 EPHB2 COL8A2 SHROOM2 THY1 NIPBL GLI3 AHI1 RBP4 FBN2 CALB1 STAT3 WNT2B WNT2 HIPK1 LRP6 BCL2 PTN HIF1A NKD1 CDON PAX2 IRX5 BMP7 SP3 FJX1 ZEB1 ABI2 DIO3 KDM2B PROM1 LCTL MFAP2 IHH COL5A2 SKI TFAP2A PRDM1 FRS2 HIPK2 IFT122 CCDC66 COL8A1 TSKU TWIST1 PROX1 SDK2 CEP290 AQP5 HMGN1 TSPAN12 TENM3 TFAP2B TDRD7 RP1 TUG1 SDK1 CABP4 WNT16 RORB FO…
REGULATION_OF_MYELOID_LEUKOCYTE_DIFFERENTIATION	0.0015873	0.0135741	0.456659	1.74494	0	105	36	SFRP1 RASSF2 CCR1 RIPK1 TYROBP LYN C1QC TLR4 CD74 TGFB1 ADIPOQ IRF7 INPP5D CASP8 HCLS1 LRRC17 LILRB3 RB1 TLR3 CSF1 CEACAM1 TAL1 PF4 MYC ID2 ZFP36L1 CREB1 EVI2B NOTCH2 LILRB4 CD4 UBASH3B RUNX1 ROR2 TNF LTF
REGULATION_OF_HEART_GROWTH	0.00486224	0.0268888	0.456326	1.59862	2	62	31	TGFBR2 RGS2 IGF1 CXADR RIPK1 BASP1 KCNK2 WT1 FGFR2 RBPJ RBP4 EDN1 GATA6 MAPK11 WNT2 ZFPM2 CCNB1 TGFBR3 ERBB4 PTEN FGF2 PROX1 YY1 NOTCH1 HAMP SAV1 TGFBR1 CTDP1 HEY2 PIM1 FGFR1
NEURAL_CREST_CELL_DIFFERENTIATION	0.00318471	0.0202312	0.456237	1.6833	1	85	29	SFRP1 SEMA3D SEMA4A SEMA3F SEMA3A CFL1 ZEB2 SMO SEMA5A CORO1C SEMA3E MAPK3 EDNRA SEMA3G ALDH1A2 FN1 EDN1 EDNRB SEMA4B NRP2 LRP6 HAND2 HIF1A SEMA3C BMP7 RET EDN3 ERBB4 GDNF
CELLULAR_RESPONSE_TO_MECHANICAL_STIMULUS	0.00485437	0.0268655	0.456082	1.64345	2	74	32	TLR8 PIEZO2 AKT1 TLR7 TNFRSF1A TLR4 TLR5 TGFB1 EGFR CASP8 CASP1 CNN2 TLR3 GCLC MAPK3 ITGA2 ATP1A1 MAP3K14 CASP8AP2 NFKB1 CYBA MAP3K2 PTPN11 HDAC4 IRF1 SLC2A1 CD40 MTPN ENG AGT SLC9A1 MYD88
FAT_CELL_DIFFERENTIATION	0.00155521	0.0135741	0.455892	1.89101	0	199	86	SFRP1 PPARG PLCB1 CCND1 SH3PXD2B SORT1 ITGA6 AACS SH2B2 SFRP2 BSCL2 AKT1 LGALS12 RGS2 GDF10 RARRES2 PLAC8 PSMB8 ARID5B TGFB1 ADIPOQ MEDAG CCDC3 ZBTB7C RNASEL JDP2 CEBPA ZFP36L2 RETN STEAP4 ENPP1 LRRC8C WWTR1 TMEM120A TGFB1I1 TRPV4 NIPBL C1QTNF3 FFAR4 ID2 ZFP36L1 CREB1 TPH1 EBF2 ERAP1 KLF5 INHBB UCP1 WDFY2 PRDM16 E2F1 STK4 ADIG BBS2 FGF10 LRG1 ARL4A STK3 SDF4 SMAD3 ZFPM2 GRK5 TNF PPARGC1A TMEM120B…
UROGENITAL_SYSTEM_DEVELOPMENT	0.00147493	0.0135741	0.455662	1.97914	0	312	145	MME DCN SFRP1 SULF2 PDGFRA SGPL1 MAGED1 EPCAM ITGA6 ANXA1 GPC3 IQGAP1 CTSH GCNT1 C1GALT1 ESR1 PRKX ENPEP PLCE1 TNC ACE PECAM1 SULF1 ITGA8 SERPINF1 ARID5B BASP1 PKD2 PSAPL1 ACTA2 SMO TACSTD2 SOX4 TGFB1 ADIPOQ PBX1 PCSK5 SERPINB5 OSR1 MYO1E CD34 MTSS1 STRA6 HPGD ANGPT2 WT1 LRRK2 FGFR2 NID1 WWTR1 EGR1 EPHB2 SDC1 STAT1 CAT NIPBL MYC ID2 WNT7B GLI3 ALDH1A2 AHI1 RBP4 ZMPSTE24 ITGB4 EMX2 CALB1 WNT2B APA…
ERBB_SIGNALING_PATHWAY	0.0015528	0.0135741	0.455507	1.78549	0	126	53	PTPRJ PIK3C2A RASSF2 AKT1 IQGAP1 NCF1 REPS2 EPS8 APP PLCE1 EFEMP1 ARF4 PIGR TGFA ITGA1 TGFB1 LGMN EGFR PSEN1 CBL GRB7 CEACAM1 RBPJ PTK2B BTC CPNE3 AFAP1L2 PTPN12 NRG4 DGKD SHC1 ERBB3 ERRFI1 PTPN18 PTPN11 MYOC AREG ARAP1 PLAUR DOK1 ERBB4 NRG2 SRC HAP1 AGT HSP90AA1 SH3GL2 SOCS4 CBLC MMP9 ADAM17 GAB1 GPRC5A
ACIDIC_AMINO_ACID_TRANSPORT	0.00980392	0.0451411	0.455504	1.58489	5	60	15	SLC1A3 ARL6IP1 LRRC8D NTRK2 APBA1 P2RX7 PSEN1 AVPR1A ABAT LRRC8C SLC7A11 STXBP1 KMO LRRC8E PPFIA4
NEGATIVE_REGULATION_OF_IMMUNE_SYSTEM_PROCESS	0.00145985	0.0135741	0.45487	2.01147	0	387	153	SFRP1 AXL CD68 PTPRJ PPARG PLCB1 SERPING1 MERTK ANXA1 TMEM176B AKT1 GPNMB FCER1G IRF4 GRN NBL1 TYROBP LYN RNF125 C1QC TWSG1 TAPBPL PLA2G2D APOD FCGR2B ENPP3 EZR TLR4 MNDA TMEM176A PDE5A CD74 ADTRP TGFB1 ADIPOQ CD300A THBS1 PTPN22 INPP5D DTX1 LGALS9 MEIS2 PARP14 LGALS3 F2RL1 APOA1 GBP1 IRAK3 TICAM2 LRRC17 ALOX15 NLRC5 TLR9 LILRB3 TNFAIP3 SPINK5 BST2 CD14 PTPRC PAG1 CX3CL1 ATM TLR3 TNFAIP8L2 SAMHD1…
REGULATION_OF_IMMUNE_SYSTEM_PROCESS	0.00126263	0.0135741	0.454743	2.16353	0	1270	554	CFH SFRP1 AXL APOE CD68 IFNGR1 PTPRJ TGFBR2 LOX PPARG C3 KIT PLCB1 C2 GAS6 PROS1 XIAP SERPING1 CFB MSN ARPC1B IL1RL2 SCARA3 MERTK B2M TRIM44 RASSF2 SH2B2 ANXA1 TLR8 IL6ST ZBP1 C1S TMEM176B DPP4 AKT1 COLEC12 C1QB NCKAP1 GPNMB RARRES2 CTSH NCKAP1L ITGAM UNC93B1 IGF1 ESR1 CCR1 TLR7 CTSB FCER1G IL1R1 APP CXADR CAV1 PIK3AP1 TNFRSF1B CCL8 C6 CAMK1D IRF4 RIPK1 GRN ACE HSP90B1 NBL1 TYROBP LYN ITGA4 C1QA …
POSITIVE_REGULATION_OF_OSSIFICATION	0.00327869	0.0202312	0.454549	1.63619	1	76	32	GPM6B DDR2 IL6ST SFRP2 CLIC1 IGF1 TGFB1 OSR1 P2RX7 CEBPA HGF IFITM1 NIPBL WNT7B GLI3 ANO6 FBN2 TMEM119 SUCO BMPR2 ZHX3 SMAD3 BMP7 CEBPD LTF MSX2 OSR2 NPNT BMPR1B TFAP2A GDPD2 ID4
OSTEOCLAST_DIFFERENTIATION	0.00318471	0.0202312	0.454431	1.67664	1	85	33	SFRP1 CD109 RASSF2 GPC3 CCR1 FCER1G TYROBP CSF1R TLR4 GAB2 TGFB1 INPP5D ANXA2 SNX10 LRRC17 LILRB3 LRRK1 TLR3 CSF1 JUNB CREB1 SBNO2 EFNA4 NOTCH2 LILRB4 GPR183 UBASH3B TNF LTF TREM2 SRC SH3PXD2A GPR68
EPIDERMIS_DEVELOPMENT	0.001443	0.0135741	0.454213	1.99075	0	345	160	CLIC4 DSP MYO5A CD109 EMP1 ANXA1 KRT17 ASAH1 KRT14 ST14 IRF6 KRT71 PERP PCSK6 KRT19 HPSE FLNB KRT79 SMO PKP1 EGFR ESRP1 CELSR1 MAFF CDSN DSG2 ATP7A FABP5 VDR SPINK5 AGPAT2 KRT10 KRT7 PKP3 FGFR2 KRT80 SFRP4 PKP4 DSC3 CASP3 KRT77 KRT1 COL17A1 KLK7 RBPJ H2AFY2 DSC1 LAMC2 KRT15 EDA FOSL2 EVPL ZFP36L1 LDB2 KRT5 KRT23 WAS GRHL1 FA2H FZD3 LOR ZMPSTE24 PRSS8 NAB1 FERMT1 KRT8 SPRR1A BCL11B BCL2 KRTDAP STK…
REGULATION_OF_IMMUNE_RESPONSE	0.001321	0.0135741	0.453282	2.10718	0	814	363	CFH APOE IFNGR1 PTPRJ PPARG C3 KIT C2 PROS1 XIAP SERPING1 CFB ARPC1B SCARA3 B2M SH2B2 ANXA1 TLR8 IL6ST ZBP1 C1S COLEC12 C1QB NCKAP1 CTSH NCKAP1L ITGAM UNC93B1 ESR1 TLR7 CTSB FCER1G IL1R1 CXADR CAV1 PIK3AP1 TNFRSF1B C6 IRF4 RIPK1 GRN HSP90B1 TYROBP LYN ITGA4 C1QA RNF125 MYO1C C1QC PSMB8 CD33 WIPF1 VAV2 FYN PIGR PTAFR BTNL9 DHX9 CLEC7A FCGR2B CTSS C3AR1 ENPP3 CD300LD PRKCB EZR TLR4 C4B RSAD2 MASP1 …
LONG_TERM_SYNAPTIC_POTENTIATION	0.00328407	0.0202312	0.453113	1.63529	1	77	34	MME APOE APP NTRK2 TYROBP LGMN RELN EPHB2 FAM107A PTK2B CREB1 SHANK2 CALB1 RGS14 PTN BRAF SLC8A3 PPP1R9A S100B ADCY1 NCSTN NSG1 IGSF11 PTEN PRKCZ EPHA4 CX3CR1 MPP2 SYT12 ADORA2A GFAP SNCA ITPR3 NLGN1
VENTRICULAR_SEPTUM_DEVELOPMENT	0.00986842	0.0453244	0.452895	1.59605	5	66	40	TGFBR2 HEG1 SLIT3 FZD1 LUZP1 PTK7 SOX4 STRA6 AP2B1 FGFR2 RBPJ ID2 ROBO1 SLIT2 BMPR2 LTBP1 ZFPM2 SALL1 VANGL2 TGFBR3 GJA5 LRP2 FGFRL1 GATA3 TRIP11 PRDM1 FZD2 FRS2 NOS3 SUFU PROX1 ZFPM1 NOTCH1 PAX8 SAV1 TGFBR1 SMAD4 HEY2 WNT5A ROBO2
RESPONSE_TO_ESTRADIOL	0.0015748	0.0135741	0.452763	1.75587	0	118	50	SFRP1 ARPC1B CCND1 ANXA1 NRIP1 POSTN ESR1 ADCYAP1R1 PAM PENK OXTR TGFB1 PTGFR EGFR CASP8 HPGD ARNT2 TFPI SLC6A4 CCNA2 STXBP1 CD38 APOB CASP3 CAT ITGA2 ALDH1A2 CALR MBD2 STAT3 PTN FGF10 CD4 CFLAR IGFBP2 MMP15 PTCH1 PPARGC1A AREG BMP7 GGT1 MSX2 RBBP8 RGS9 UGT1A1 IHH PTEN FAM210B AGT GJB2
REGULATION_OF_EPIDERMIS_DEVELOPMENT	0.00481541	0.0267304	0.45274	1.62962	2	72	39	CD109 HPSE SMO ESRP1 MAFF CDSN VDR SPINK5 KRT10 SFRP4 H2AFY2 ZFP36L1 GRHL1 NAB1 FERMT1 CDH3 GRHL2 ERRFI1 ROCK1 PTCH1 RUNX1 TNF MYSM1 MSX2 AQP3 CTSL PRKCH CTSK SFN NOTCH1 FOXC1 KRT2 SULT2B1 FST SMAD4 HEY2 KRT36 WNT5A GDF3
LOCOMOTORY_BEHAVIOR	0.00152439	0.0135741	0.452394	1.84616	0	168	65	APOE NEGR1 MYO5A DPP4 EPS8 APP CHL1 APBA1 PENK ALDH1A3 SPG11 CELSR1 PPT1 ATP7A STRN UBA6 HPGDS LRRK2 ABAT EGR1 GPRC5B HEXB ARCN1 TAL1 GMFB PBX3 NCOA2 SEZ6L ID2 PREX2 ZMPSTE24 CALB1 CXCL12 FZD4 GLRB ABHD12 CNP NPY1R EFNB3 MTA1 ADCY5 DAB1 APH1B ARRDC3 HOXB8 GDNF CSTB NR4A2 OLFM2 PTEN APBA2 IDO1 EPHA4 LGI4 HIPK2 FIG4 CTNS CNTN2 SNCG CLN6 VPS13A ADORA2A ARRB2 NOVA1 CHRNA4
PLACENTA_DEVELOPMENT	0.00156006	0.0135741	0.452271	1.78491	0	134	56	MME DCN PPARG PTGIS AKT1 ST14 CTSB KRT19 PKD2 EGFR CASP8 VDR E2F8 CEBPA ADM FGFR2 JUNB MAPK3 RBPJ STC1 ZFP36L1 WNT7B MEN1 RSPO3 SPINT1 SPINT2 WNT2 KRT8 ETNK2 ITGB8 STK4 BMPR2 CDKN1C TCF23 GRHL2 SOCS3 HIF1A STK3 ADA MC2R EOMES BMP7 FBXW8 SP3 SETD2 GJB3 PLK4 IGF2 BMP5 CITED1 CCNF GJB2 PRDM1 HTRA1 TTPA CUL7
POSITIVE_REGULATION_OF_RESPONSE_TO_WOUNDING	0.00985222	0.0452783	0.452034	1.55198	5	56	29	TGFBR2 ANXA1 GRN F2R HPSE SELP TLR4 THBS1 ATP7A PDPN PLG DUOX2 ANO6 PLEK CD36 BRAF F3 MYLK NFE2L2 F2 THBD SERPINF2 DUOX1 HRG LRP1 FOXC2 APOH ADRA2A XBP1
RESPIRATORY_SYSTEM_DEVELOPMENT	0.0015456	0.0135741	0.45198	1.87445	0	188	75	MME MAN2A1 TGFBR2 LOX PDGFRA HEG1 GPC3 CTSH LIPA TNC MMP14 TNS3 MAN1A2 HSD11B1 PTK7 SMPD3 BASP1 ADAMTS2 ALDH1A3 EGFR CELSR1 ATP7A RCN3 STRA6 CHI3L1 CEBPA WT1 FGFR2 PGR SLC7A11 PDPN EIF4EBP1 MAPK3 RBPJ EDA ATXN1L WNT7B CREB1 GLI3 ALDH1A2 RBP4 GATA6 WNT2B WNT2 LRP6 PTN BMPR2 FGF10 ESRP2 SMCHD1 FOXP2 GRHL2 IGFBP5 ABCA12 LOXL3 ERRFI1 FLT4 ADA ARG1 ZFPM2 DLG5 TNF VANGL2 SLC23A1 KRAS SP3 TCF21 DLX5 CCD…
LYSOSOME_LOCALIZATION	0.00985222	0.0452783	0.451898	1.55926	5	57	22	KIT FCER1G LYN PIK3CG RAB34 GAB2 CPLX2 CD300A LGALS9 SYK RAC2 ADORA2B CBL STXBP2 STXBP1 CD84 BTK FGR MAP6 IL13RA2 RASGRP1 HMOX1
REGULATION_OF_DEFENSE_RESPONSE_TO_VIRUS	0.00980392	0.0451411	0.451738	1.56505	5	59	33	TRIM44 RNF125 DHX9 DTX3L PYCARD TNFAIP3 TMEM173 DDX58 PARP9 STAT1 ZMPSTE24 IL2RA ZCCHC3 IFIT1 MMP12 ITCH AIM2 DDX60 TSPAN32 DHX58 HTRA1 TRAF3 IL12RB1 IFNLR1 TRAF3IP2 RNF26 TRIM6 RNF216 BIRC3 GPATCH3 ZC3H12A SEC14L1 IL23R
RENAL_SYSTEM_DEVELOPMENT	0.00150602	0.0135741	0.451687	1.93744	0	280	131	MME DCN SFRP1 SULF2 PDGFRA SGPL1 MAGED1 EPCAM ITGA6 GPC3 IQGAP1 CTSH GCNT1 C1GALT1 PRKX ENPEP PLCE1 ACE PECAM1 SULF1 ITGA8 SERPINF1 ARID5B BASP1 PKD2 ACTA2 SMO TACSTD2 SOX4 TGFB1 ADIPOQ PBX1 PCSK5 OSR1 MYO1E CD34 MTSS1 STRA6 HPGD ANGPT2 WT1 LRRK2 FGFR2 NID1 WWTR1 EGR1 SDC1 STAT1 CAT NIPBL MYC ID2 WNT7B GLI3 ALDH1A2 AHI1 RBP4 ZMPSTE24 ITGB4 EMX2 CALB1 WNT2B APAF1 BCL2 SLIT2 FGF10 IRX1 CDKN1C CFLAR…
CELLULAR_RESPONSE_TO_RETINOIC_ACID	0.00656814	0.0333622	0.45168	1.58719	3	64	24	PPARG ADNP2 TNC LYN PTK7 SERPINF1 ABCA1 OSR1 PCK1 ATM SLC6A4 FGFR2 PTK2B WNT7B CREB1 ALDH1A2 FZD10 WNT2 FZD4 EPHA3 PAX2 RET WNT6 GJB3
NEUTRAL_LIPID_METABOLIC_PROCESS	0.0016	0.0135741	0.451268	1.72649	0	108	53	APOC1 APOE C3 AGMO ABHD2 MGLL CAV1 LIPE PLCE1 CPT1A PIK3CG DGAT1 PNPLA2 APOBR ACSL1 LPIN2 FABP5 APOA1 PCK1 APOBEC1 APOB FABP1 CAT SEL1L THRSP DGKD APOA2 ABHD12 APOC3 CYP2E1 PTPN11 CPS1 SIK1 PCK2 INSIG1 FABP4 LDLR MOGAT1 GK5 RGN SERPINA12 ACSL4 DGKB LPL SLC22A4 GPX1 SLC27A1 DGAT2 LIPC ANG APOC2 APOH SLC27A5
HORMONE_BIOSYNTHETIC_PROCESS	0.00491803	0.0270265	0.450586	1.59332	2	68	25	POR HSD17B12 HSD17B11 SRD5A3 DIO2 HSD11B1 VDR ADM EGR1 DUOX2 ATP1A1 TSPO NFKB1 HIF1A TNF PPARGC1A CYP11A1 DIO3 GFI1 SLC44A4 BMP5 HSD11B2 DUOX1 SRD5A1 DKKL1
POSITIVE_REGULATION_OF_EXOCYTOSIS	0.00328407	0.0202312	0.450568	1.62611	1	77	43	ITGAM FCER1G CADPS2 PTAFR SMPD3 GAB2 ITGB2 F2RL1 SYK RAB3D ADORA2B FGB FGA STXBP1 FGR SDC1 SCAMP5 PDCD6IP FGG SDCBP AP1G1 EXPH5 RAB2B VPS4B RAB27B DOC2B CACNA1D CNR1 CD177 STXBP5 UNC13B SDC4 CACNB2 RAB27A RAB5A SYTL4 GATA2 SYT7 SNCA NLGN1 UNC13D CFTR STAM
AMEBOIDAL_TYPE_CELL_MIGRATION	0.00145773	0.0135741	0.450317	1.97765	0	356	162	DCN APOE TGFBR2 ARSB PPARG KIT RHOJ PIK3C2A DDR2 MAP4K4 SGPL1 ANXA1 SEMA3D CYP1B1 GPC3 DPP4 AKT1 CTSH MET SEMA4A PRKX GRN PECAM1 ITGA4 SEMA3F ENPP2 CAP1 SPRED1 P2RX4 SERPINF1 SEMA3A ARID5B DOCK5 CFL1 EVL ZEB2 ITGB2 SMO TACSTD2 ADTRP SP1 TGFB1 LGMN PRCP THBS1 CORO1B GNA12 SEMA5A ARHGDIB EMP2 PTPRM APOA1 PRR5L ANGPT2 CORO1C LOXL2 BAG4 CEACAM1 SEMA3E PTK2B ITGA2 STC1 GLIPR2 SEMA3G ROBO1 ACVR1C FN1 P…
ADENYLATE_CYCLASE_ACTIVATING_G_PROTEIN_COUPLED_RECEPTOR_SIGNALING_PATHWAY	0.00317965	0.0202312	0.450055	1.67489	1	91	42	CXCL9 MRAP ADCY3 GNG2 GNB1 ABCA1 TSHR PTGER3 GNA13 PTGFR ATP2B4 GNAI2 ADORA2B ADM ADCY7 PF4 CALCRL GNAL PTGER2 GPR65 MC5R MC2R ADCY5 GPR161 ADCY1 ARRDC3 SLC9A3R1 ADRA2C AKAP13 ADRB3 PTH1R PTGER4 SSTR4 RXFP1 ADORA2A ADRA1A RAPGEF2 ADRA2A ADRA1D ADCY6 PTHLH CXCL10
OSSIFICATION	0.00144718	0.0135741	0.449851	1.97598	0	353	159	SFRP1 LOX IGFBP3 CDH11 GPM6B DDR2 SH3PXD2B TPM4 SORT1 RASSF2 IL6ST SFRP2 COMP GPC3 OMD AKT1 CLIC1 GDF10 GPNMB CHRDL1 FZD1 IGF1 CCR1 TNC SMOC1 SRGN MMP14 TWSG1 IGSF10 DHX9 SMPD3 AHSG PENK SMO CLEC3B TGFB1 EXT1 CLEC11A ACP5 PBX1 EGFR EIF2AK3 RRBP1 OSR1 P2RX7 SNX10 ALOX15 CEBPA VCAN SHOX2 MGP HGF ENPP1 FGFR2 BMP3 S1PR1 MMP2 CSF1 WWTR1 JUNB ECM1 IFITM1 FASN FGR MAPK3 PLXNB1 RBPJ DUOX2 PTK2B CAT NIPBL…
RESPONSE_TO_VIRUS	0.00150602	0.0135741	0.449407	1.90907	0	254	118	IFITM2 CXCL9 IFNGR1 TRIM44 TLR8 ISG20 UNC93B1 TLR7 CCL8 DCLK1 RNF125 NPC2 DHX9 CFL1 IFITM3 PENK IFIT2 RSAD2 ACTA2 IRF5 IRF7 LGALS9 ZC3HAV1 SERINC3 IFNAR2 DTX3L RNASEL F2RL1 PYCARD GBP1 DNAJC3 IRAK3 NLRC5 TLR9 IFIH1 TNFAIP3 SERINC5 BST2 LCN2 PTPRC TMEM173 RTP4 DDX58 TLR3 SAMHD1 APOBEC1 APOB GBP3 IFITM1 FGR PARP9 DUOX2 STAT1 IRF9 OAS3 CCL5 TRIM56 ADARB1 ZMPSTE24 ADAR MAPK11 CXCL12 MAP3K14 EIF2AK2 I…
CYTOKINE_MEDIATED_SIGNALING_PATHWAY	0.00136799	0.0135741	0.448768	2.0615	0	649	294	IL13RA1 AXL IFITM2 CXCL9 ACTN4 IFNGR1 PPARG KIT PLCB1 GAS6 MSN IL1RL2 LEPR CCND1 CSF2RB CD44 B2M TRIM44 SH2B2 ANXA1 IL6ST ZBP1 SLIT3 ISG20 AKT1 ITGAM GREM2 CCR1 PELI2 CCR5 FCER1G IL1R1 IRF6 CAV1 TNFRSF1B CCL8 IRF4 RIPK1 TNFRSF1A HSP90B1 CSF1R OSMR STK39 PSMB8 FYN F13A1 PTAFR IL17RC RAP1B PRLR CFL1 IFITM3 IFIT2 RSAD2 GAB2 VIM ITGB2 IRF5 CIITA CD74 IL2RG TGFB1 ADIPOQ IRF7 TNFRSF13C INPP5D CCDC3 PLV…
STEROID_METABOLIC_PROCESS	0.00149925	0.0135741	0.448584	1.89997	0	247	103	APOC1 APOE POR LIMA1 KIT PDGFRA LEPR SGPL1 TTC39B HSD17B12 HSD17B11 CYP1B1 ASAH1 LIPA SRD5A3 ACACA ESR1 APP LIPE SOAT1 NPC2 ACLY DHCR24 HSD11B1 SLC27A2 PRLR ABCA1 HMGCS2 SP1 LGMN IGFBP7 PBX1 APOBR CYB5R3 APOA1 GC SQLE VDR CEBPA ADM SREBF2 HMGCR ELOVL6 DHRS9 EGR1 APOB FASN PON1 CAT STARD4 ATP1A1 OSBPL5 ERLIN2 APOA2 TSPO ABCG1 NFKB1 KPNB1 MBTPS1 NFYA SCAP ERLIN1 CYP2E1 TNF PPARGC1A SDR42E1 RORA PRK…
POSITIVE_REGULATION_OF_EPITHELIAL_CELL_MIGRATION	0.00155521	0.0135741	0.448121	1.7656	0	130	76	TGFBR2 RHOJ PIK3C2A MAP4K4 ANXA1 AKT1 CTSH MET GRN ENPP2 P2RX4 DOCK5 SP1 TGFB1 LGMN THBS1 SEMA5A PTK2B ITGA2 GLIPR2 CALR EDN1 RAB25 DOCK1 PPM1F NRP2 AKT3 BMPR2 FGF10 HIF1A FLT4 MAP3K3 HMOX1 ITGB3 NFE2L2 SASH1 TEK CD40 FGF7 HDAC9 ITGA3 SRC CCR6 AGT HYAL1 GATA3 ARF6 FGF2 FOXP1 ANGPT4 NOS3 PROX1 PRKD1 MMP9 ADAM17 FGF16 ANXA3 HDAC6 KDR FOXC2 GATA2 VEGFC RHOB SPARC PLCG1 ZC3H12A PRKD2 PDPK1 ATOH8 WNT7…
NEGATIVE_REGULATION_OF_RESPONSE_TO_EXTERNAL_STIMULUS	0.00150602	0.0135741	0.447937	1.92797	0	290	136	APOE PPARG PROS1 SERPING1 PDGFRA PTGIS CD109 SEMA3D IGF1 PLAT SEMA4A TNFRSF1B TNFRSF1A GRN NBL1 RNF125 ABCD2 SEMA3F NT5E CD9 SERPINF1 SEMA3A APOD FCGR2B ANXA5 ENPP3 NUCB2 ADTRP ADIPOQ SIRPA ACP5 THBS1 ANXA2 CORO1B SEMA5A PYCARD APOA1 CD34 ANGPT2 TNFAIP3 RB1 SPINK5 PTPRC CX3CL1 HGF HMGCR TFPI ABAT C1QTNF1 TNFAIP8L2 FGB PLG FGA MFHAS1 PDCD4 ADCY7 CEACAM1 CASK SLAMF8 SEMA3E KRT1 CALCRL STAP1 KNG1 C1…
SKELETAL_SYSTEM_DEVELOPMENT	0.00140845	0.0135741	0.447821	2.013	0	476	183	TGFBI SFRP1 SULF2 POR COL14A1 IGFBP4 TGFBR2 LOX KIT CDH11 PLS3 SCARA3 PDGFRA SGPL1 SH3PXD2B CD44 RASSF2 SFRP2 COMP COL12A1 PAPSS2 PDGFC GDF10 IGF1 CHST11 ADAMTS12 TYROBP EFEMP1 MMP14 SULF1 PAPPA2 SMPD3 VIT ARID5B AHSG PIP4K2A LUM MATN2 SOX4 TGFB1 EXT1 ACP5 PBX1 PCSK5 ANXA2 EIF2AK3 OSR1 ATP7A P2RX7 VDR LRRC17 RPS6KA3 CHI3L1 VCAN PSEN1 PTPRC GLG1 SHOX2 MGP LOXL2 LRRK1 FGFR2 BMP3 TIFAB SFRP4 MMP2 PT…
RESPONSE_TO_CYTOKINE	0.00127226	0.0135741	0.447228	2.10228	0	1015	426	MME IL13RA1 SFRP1 AXL IFITM2 CXCL9 ACTN4 TIMP2 IFNGR1 LOX PPARG MRC1 KIT PLCB1 GAS6 MSN IL1RL2 LEPR PTGIS CCND1 CSF2RB CD44 B2M TRIM44 SH2B2 ANXA1 IL6ST ZBP1 SLIT3 POSTN ISG20 AKT1 PTPN9 DPYSL3 ASAH1 ITGAM EPS8 CLDN1 GREM2 CCR1 PRKCI PELI2 ASAH2 CCR5 FCER1G IL1R1 IRF6 CAV1 ADAMTS12 TNFRSF1B CCL8 IRF4 RIPK1 TNFRSF1A HSP90B1 ITGA4 CSF1R MYO1C OSMR STK39 PSMB8 PFKP MAP3K5 FYN LAPTM5 F13A1 PTAFR PTPN…
ISOPRENOID_METABOLIC_PROCESS	0.00324675	0.0202312	0.447039	1.63187	1	82	39	APOE GPC6 CYP1B1 GPC3 RARRES2 SRD5A3 NPC2 DGAT1 ALDH1A3 SDC2 EGFR APOA1 STRA6 TTR SDC3 DHRS9 APOB ADH7 SDC1 ALDH1A2 RBP4 RBP1 APOA2 RDH12 RDH11 APOC3 CYP2E1 LRAT ABCA4 LRP2 SRD5A1 LRP8 ALDH3A2 SDC4 LPL LRP1 DGAT2 BCO2 APOC2
PLASMA_MEMBRANE_ORGANIZATION	0.00318471	0.0202312	0.446958	1.64907	1	85	40	DMKN MYOF AKT1 CAV1 NDRG1 ASAP1 ABCD2 GSN BIN2 TMEFF2 P2RX7 MTSS1 PTPRC SERP1 MYRF MYH10 CAV2 ANO6 FA2H PLSCR2 SPTBN1 FNBP1L EHD2 MICALL1 BAIAP2 PLSCR1 FCHO1 ANO4 PTEN PACSIN1 SNX9 BAIAP2L1 ANO9 FCHO2 PACSIN2 SH3GL2 SPTA1 PLSCR4 CLU A4GALT
REGULATION_OF_JUN_KINASE_ACTIVITY	0.00325203	0.0202312	0.446888	1.62339	1	79	36	SFRP1 SFRP2 RIPK1 MAP3K5 ZEB2 PTPN22 MLKL SYK TLR9 PDCD4 MAP4K1 PTK2B MDFIC WNT7B EDN1 MAPK8IP1 FZD10 FZD4 DBNL MAP3K9 ERN1 MAP3K2 ROR2 TNF VANGL2 SASH1 PTPN1 TAOK3 AIDA MAP3K6 EPHA4 ARHGEF5 FGD2 TRAF6 CCL19 TLR6
RESPONSE_TO_BMP	0.0015674	0.0135741	0.446776	1.77861	0	147	53	SFRP1 XIAP SFRP2 COMP GPC3 SFRP5 CHRDL1 FZD1 GREM2 ADAMTS12 NBL1 TWSG1 SULF1 PCSK6 SMPD3 TNMD FSTL1 SFRP4 CTDSPL2 PDCD4 EGR1 RBPMS2 MAPK3 RBPJ ZFYVE16 SPINT1 SMURF2 GATA6 SPINT2 ACVRL1 GDF5 BMPR2 VWC2 GDF7 SKIL SOSTDC1 ROR2 BMP7 DLX5 MSX2 TGFBR3 LRP2 ITGA3 ENG BMP5 BMPR1B SKI SMURF1 GATA3 GREM1 HTRA1 HIPK2 TMEM100
SMALL_GTPASE_MEDIATED_SIGNAL_TRANSDUCTION	0.00140252	0.0135741	0.446673	2.01765	0	510	249	CGNL1 FAM13A APOE TIMP2 RAPGEF5 RHOJ MAP4K4 DOCK11 HEG1 SH2B2 RASA3 RAB8B NCKAP1 EPS8 IGF1 MET PLCE1 LPAR1 ARHGDIA PECAM1 GNB1 LYN ADCYAP1R1 RAB31 SRGAP1 VAV2 F2R CYTH3 PLEKHG1 DOCK5 RAP1B RAB34 CFL1 NTN1 ARAP2 SRGAP3 ARHGEF3 RIN2 RAB32 SYDE2 RAB43 ABCA1 PREX1 DOCK7 DOCK10 GNA13 RACGAP1 ARHGEF28 GNA12 RALGPS2 CYTH4 CELSR1 ARHGAP29 ARHGDIB F2RL1 CYFIP1 DOK2 RALGAPA2 APOA1 RAP2B RAB3D RGL1 ARHGAP32…
REGULATION_OF_NIK_NF_KAPPAB_SIGNALING	0.0032	0.0202312	0.446509	1.66545	1	93	42	ACTN4 TRIM44 RASSF2 TLR7 APP LITAF TLR4 PTPN22 LGALS9 EGFR CHI3L1 TLR9 CD14 TLR3 PDCD4 EDA C1QTNF3 CALR EDN1 TRIP6 EIF2AK2 RHOA BCL3 HAVCR2 TNF IL18R1 SASH1 MALT1 BMP7 TRAF4 SPHK1 RELA IL18 CPNE1 GREM1 CD27 TLR2 TRAF6 CCL19 MMP8 TNFSF14 TLR6
ENDOTHELIAL_CELL_PROLIFERATION	0.0015528	0.0135741	0.446433	1.75173	0	125	74	APOE PPARG AKT1 PRKX CAV1 ITGA4 MMP14 THBS4 SULF1 TNMD SP1 THBS1 SEMA5A PTPRM APOA1 CD34 LOXL2 ECM1 NGFR STAT1 ALDH1A2 CAV2 STAT3 CXCL12 WNT2 ACVRL1 NRP2 APLN CYBA AKT3 BMPR2 LRG1 HIF1A FLT4 F3 ERN1 HMOX1 ITGB3 ARG1 HMGB2 TNF CCL2 TEK EGR3 FGF2 PIK3CB VASH2 PROX1 PRKD1 ADAM17 ANG XDH KDR GATA2 AGGF1 APOH VEGFC XBP1 SPARC TGFBR1 PLCG1 PRKD2 CCL24 PDPK1 ATOH8 PPP1R16B NRP1 WNT5A CCL11 FGFR1 SIRT1 P…
REGULATION_OF_ENDOTHELIAL_CELL_MIGRATION	0.0015748	0.0135741	0.445595	1.76751	0	144	78	DCN APOE PPARG RHOJ PIK3C2A ANXA1 AKT1 MET SEMA4A GRN SPRED1 P2RX4 SERPINF1 SP1 TGFB1 LGMN PRCP THBS1 SEMA5A EMP2 PTPRM ANGPT2 CEACAM1 PTK2B STC1 CALR EDN1 STARD13 ACVRL1 NRP2 AKT3 SLIT2 BMPR2 RHOA HIF1A FLT4 MAP3K3 HMOX1 ITGB3 NFE2L2 SASH1 TEK CD40 HDAC9 AGT SP100 GATA3 FGF2 HRG KLF4 FOXP1 ANGPT4 NOS3 ADAMTS9 PROX1 PRKD1 ADAM17 FGF16 ANXA3 KDR FOXC2 NOTCH1 GATA2 APOH VEGFC SH3BP1 RHOB SPARC PLCG…
RESPONSE_TO_AXON_INJURY	0.00819672	0.0396421	0.445353	1.57482	4	68	28	CTNNA1 DPYSL3 PTPRF TNC GRN TYROBP LYN ARF4 P2RX4 APOD MATN2 KCNK2 APOA1 P2RY12 JAK2 TSPO BCL2 CERS2 BRAF ARG1 STK24 RTN4RL2 PTEN MAX GAP43 EPHA4 KLF4 AIF1
POSITIVE_REGULATION_OF_ANIMAL_ORGAN_MORPHOGENESIS	0.00492611	0.0270265	0.44521	1.60677	2	77	35	TGFBR2 MAGED1 BASP1 SMO TGFB1 CD34 VDR TNFAIP3 WT1 FGFR2 CSF1 RBPJ MYC ROBO1 EDN1 WNT2B WNT2 PTN HAND2 FGF10 FOXP2 CFLAR SEMA3C PAX2 BMP7 WNT6 FGF7 HOXA11 ENG GDNF AGT GATA3 TFAP2A GREM1 FRS2
EPITHELIAL_CELL_DIFFERENTIATION	0.0013947	0.0135741	0.444774	2.02728	0	609	279	CLIC4 DSP PPARG MSN CCND1 HEG1 CD109 CLDN3 ANXA1 KRT17 AKT1 IQGAP1 ASAH1 FZD1 KRT14 CLDN1 ST14 C1GALT1 ESR1 CTSB FNDC3A MET IRF6 PRKX CAV1 TNFRSF1A PECAM1 CPT1A KRT71 PERP SIDT2 DAB2 PTK7 PCSK6 TNMD KRT19 RAP1B BASP1 TAGLN2 FLNB EZR ZEB2 PSAPL1 VIM ACTA2 KRT79 SMO SOX4 TGFB1 ADIPOQ TJP2 PKP1 CNN3 ANXA2 TBC1D20 ESRP1 MAFF LGALS3 POF1B CDSN DSG2 OSR1 F2RL1 MYO1E PCK1 CD34 FAT1 MTSS1 VDR COL23A1 E2F…
T_CELL_DIFFERENTIATION_IN_THYMUS	0.00819672	0.0396421	0.44461	1.57219	4	68	30	B2M CD74 CARD11 ZFP36L2 PTPRC DOCK2 ADAM8 VNN1 ZFP36L1 GLI3 IL7R CD3D BCL11B BCL2 ADA RASGRP1 RIPK3 CD3E CD3G ZEB1 CCR6 IHH NFKBID GATA3 EGR3 GLI2 CDK6 ADAM17 ZAP70 ITPKB
IMPORT_ACROSS_PLASMA_MEMBRANE	0.00157978	0.0135741	0.44347	1.7	0	107	40	SLC1A3 AKT1 RGS2 ARL6IP1 SLC36A4 FYN FOLR2 KCNJ15 THBS1 ATP1A3 SLC7A1 ATP2B4 SLC39A6 PSEN1 SLC9A9 SLC39A8 SLC7A11 ATP1B3 SLC3A2 HCN4 PICALM SLC39A4 SLC2A5 ATP1A1 IRS2 SLC46A1 SLC39A14 SLC9A7 FXYD2 SLC1A5 SLC8A3 SLC12A7 TRPM2 SLC39A10 LRP2 AGT KCNH2 ATP1A4 SLC9A1 SLC30A1
POSITIVE_REGULATION_OF_MYELOID_CELL_DIFFERENTIATION	0.00325733	0.0202312	0.443449	1.616	1	81	35	NCKAP1L CCR1 RIPK1 TYROBP CD74 TGFB1 INPP5D CASP8 HCLS1 RB1 CSF1 TAL1 PF4 STAT1 ID2 ZFP36L1 CREB1 EVI2B STAT3 CD4 HIF1A RUNX1 FOXO3 HMGB2 ROR2 TNF FAM210B GPR68 FES TRAF6 HSPA1B ISG15 GATA1 GATA2 ANKRD54
GLIOGENESIS	0.00150602	0.0135741	0.443306	1.88597	0	257	104	PPARG LAMB1 ANXA1 IL6ST AKT1 PRKCI APP NDRG1 LPAR1 NTRK2 GRN LYN C1QA CSF1R MMP14 CD9 P2RX4 MATN2 TLR4 PENK PHGDH VIM SMO SOX4 TGFB1 DTX1 EGFR GSN PSEN1 CX3CL1 PLP1 CSK RELN B4GALT6 CSF1 HEXB TAL1 MAPK3 PTK2B MYRF STAP1 LAMC3 ID2 CREB1 GLI3 P2RY12 FA2H BACE2 SPINT1 SRGAP2 STAT3 TSPAN2 NAB1 TSPO ERBB3 CDKN2C PTN CNP CERS2 E2F1 C5AR1 RHOA FGF10 IL33 GPR183 SLC8A3 APCDD1 TENM4 S100B HDAC1 PTPN11 MYO…
REGULATION_OF_RESPONSE_TO_DRUG	0.00485437	0.0268655	0.442818	1.59566	2	74	33	RGS2 ARL6IP1 MET RIPK1 STK39 OSR1 RETN PSEN1 HGF LRRK2 ABAT CXCL12 KCNA2 FOXO3 PTPN11 ARG1 NFE2L2 NR4A3 CNR1 GDNF AGT PAWR HMGA2 SNCG PDE8A SYT12 ADORA2A HDAC6 CHRNA4 SYT7 SNCA SYT15 RAB3B
RESPONSE_TO_CORTICOSTEROID	0.0015361	0.0135741	0.442773	1.78192	0	153	70	CYBB CCND1 ANXA1 SLIT3 CLDN1 BCHE PAM CDO1 PTAFR SERPINF1 TGFB1 ADIPOQ IGFBP7 EGFR PCK1 ZFP36L2 ADM AVPR1A ACSBG1 GLB1 EPHX1 CASP3 EIF4EBP1 MDK FAM107A SDC1 STC1 ZFP36L1 WNT7B EDN1 TYMS APOA2 PAPPA CYBA BCL2 SLIT2 RHOA ICAM1 FLT3 CFLAR CREBRF ERRFI1 IGFBP2 IL1RN S100B USP8 FOXO3 ARG1 CPS1 TNF ABCA3 FOSB BCL2L11 AREG KRAS PCK2 NR3C1 UGT1A1 ENG SRC GJB2 PTPRU AKAP13 HSD11B2 GBA CAD ATP2B1 SRD5A1 AI…
REGULATION_OF_RESPONSE_TO_BIOTIC_STIMULUS	0.00156495	0.0135741	0.442677	1.70711	0	111	62	TRIM44 GRN RNF125 DHX9 CD180 LY86 DTX3L F2RL1 PYCARD TNFAIP3 SPINK5 CX3CL1 TMEM173 DDX58 CEACAM1 PARP9 KLK7 MAPK3 STAT1 CD274 ZMPSTE24 KLRK1 IL2RA CYBA CD36 ZCCHC3 IFIT1 HAVCR2 MMP12 ARG1 ITCH SASH1 LTF AIM2 DDX60 TSPAN32 CD226 DHX58 TBK1 HTRA1 HRG TRAF3 ARG2 UNC13B FOXP1 IL12RB1 TRAF6 IFNLR1 TRAF3IP2 RNF26 TRIM6 RNF216 RIPK2 LY96 BIRC3 GPATCH3 ZC3H12A NLRP10 SEC14L1 IL23R NFKBIL1 NOD1
CAMERA_TYPE_EYE_MORPHOGENESIS	0.00316957	0.0202312	0.442618	1.67803	1	101	51	MAN2A1 ALDH1A3 TBC1D20 PTPRM FAT1 STRA6 BCAR3 EPHB2 COL8A2 SHROOM2 THY1 GLI3 AHI1 RBP4 CALB1 WNT2B WNT2 HIPK1 LRP6 PTN HIF1A CDON PAX2 IRX5 BMP7 SP3 FJX1 ZEB1 ABI2 DIO3 KDM2B PROM1 LCTL IHH SKI TFAP2A FRS2 HIPK2 IFT122 COL8A1 TSKU TWIST1 PROX1 SDK2 AQP5 HMGN1 TSPAN12 TENM3 TFAP2B TDRD7 RP1
PANCREAS_DEVELOPMENT	0.00821018	0.0396421	0.44251	1.56758	4	69	32	ILDR2 ANXA1 AKT1 MET SIDT2 SMO SOX4 EIF2AK3 MEIS2 ALDH1A2 MEN1 GATA6 MSLN FGF10 CCDC40 IHH IGF2 BMP5 PROX1 CDK6 CCDC39 CELA1 HNF4A HNF1B CLOCK XBP1 FOXO1 PDPK1 WNT5A ONECUT2 SMAD2 FOXA2
EPIDERMAL_CELL_DIFFERENTIATION	0.00150602	0.0135741	0.442181	1.87109	0	246	106	CLIC4 DSP CD109 ANXA1 KRT17 ASAH1 KRT14 ST14 IRF6 KRT71 PERP PCSK6 KRT19 FLNB KRT79 PKP1 ESRP1 MAFF CDSN DSG2 VDR SPINK5 KRT10 KRT7 PKP3 KRT80 SFRP4 PKP4 DSC3 CASP3 KRT77 KRT1 RBPJ H2AFY2 DSC1 KRT15 FOSL2 EVPL ZFP36L1 KRT5 KRT23 GRHL1 FA2H LOR PRSS8 KRT8 SPRR1A BCL11B STK4 CDH3 SCEL KAZN GRHL2 ABCA12 ERRFI1 ROCK1 SLC4A7 PTCH1 TGM1 RUNX1 HDAC1 TCHH EXPH5 MSX2 AQP3 KRT25 SLC9A3R1 CTSL SLC44A4 PRKCH…
HORMONE_METABOLIC_PROCESS	0.0015625	0.0135741	0.441944	1.80662	0	176	59	MME POR PDGFRA SGPL1 HSD17B12 HSD17B11 CYP1B1 SRD5A3 ESR1 ENPEP ACE DIO2 CMA1 HSD11B1 PCSK6 SCPEP1 DGAT1 ALDH1A3 PCSK5 APOA1 VDR ADM CPA3 TTR DHRS9 EGR1 ADH7 DUOX2 ALDH1A2 ATP1A1 RBP4 ALDH9A1 BACE2 ZMPSTE24 TSPO RDH12 NFKB1 RDH11 HIF1A CPQ DUOXA1 PTPN11 TNF PPARGC1A ECE1 CTSZ LRAT CYP11A1 CRABP2 DIO3 GFI1 UGT1A1 GHR SLC44A4 BMP5 DUOXA2 GATA3 HSD11B2 DUOX1
CARDIAC_SEPTUM_MORPHOGENESIS	0.00821018	0.0396421	0.441814	1.56511	4	69	38	TGFBR2 PARVA SLIT3 FZD1 SMO SOX4 FGFR2 RBPJ ID2 ROBO1 NOTCH2 GATA6 NRP2 SLIT2 BMPR2 SEMA3C ZFPM2 VANGL2 BMP7 MSX2 TGFBR3 GJA5 LRP2 FGFRL1 ENG BMP5 FZD2 NOS3 PROX1 ZFPM1 NOTCH1 SAV1 TGFBR1 SMAD4 HEY2 NRP1 WNT5A ROBO2
G_PROTEIN_COUPLED_RECEPTOR_SIGNALING_PATHWAY	0.00135501	0.0135741	0.441362	2.04052	0	719	241	CXCL9 APOE PPARG C3 GABRA3 PLCB1 PDE1A TMOD2 SORT1 ANXA1 MRAP ADCY3 AKT1 RGS2 GNG2 FZD1 YWHAB ESR1 CCR1 MGLL IQGAP2 CCR5 MET APP CAV1 CCL8 PLCE1 LPAR1 GNB1 ADCYAP1R1 GNAI3 ACPP PDE3B VAV2 F2R PTAFR PIK3CG PRKD3 C3AR1 APLP2 EZR ARHGEF3 RGS5 PENK OXTR PSAPL1 ABCA1 TSHR SMO PTGER3 GNG12 TGM2 PREX1 GNA13 KCNK2 GNA12 PTGFR CELSR1 RGS16 F2RL1 PIK3R5 CYSLTR1 APOA1 ATP2B4 NET1 GPSM2 HPGD GNAI2 RAC2 ADORA…
FIBROBLAST_PROLIFERATION	0.00485437	0.0268655	0.441292	1.59796	2	78	38	SFRP1 PPARG GAS6 DDR2 PDGFRA PDGFC IGF1 ESR1 DHX9 CD74 TGFB1 CD300A ANXA2 EGFR CCNA2 BTC FOSL2 MYC WNT7B CREB1 FN1 ZMPSTE24 WNT2 E2F1 FGF10 PDGFD CCNB1 ZMIZ1 PML SPHK1 CDK4 SKI AGT PAWR CDC6 MYB CDK6 NUPR1
EPITHELIAL_CELL_PROLIFERATION	0.00147059	0.0135741	0.441135	1.92894	0	335	183	SFRP1 APOE SULF2 IGFBP4 PPARG KIT IGFBP3 LAMB1 CCND1 MAGED1 CD109 SFRP2 GPC3 AKT1 IGF1 ESR1 IRF6 PRKX CAV1 GRN ITGA4 MMP14 THBS4 SIDT2 SULF1 SERPINF1 TNMD TGFA SMO TACSTD2 SP1 TGFB1 THBS1 SEMA5A EGFR SERPINB5 OSR1 ATP7A PTPRM APOA1 CD34 MTSS1 VDR TNFAIP3 RB1 PSEN1 EHF HGF LOXL2 FGFR2 PGR ECM1 CEACAM1 CASK COL8A2 NGFR STAT1 MYC ID2 ZFP36L1 ROBO1 ALDH1A2 MEN1 CAV2 EDNRB RUNX3 STAT3 CXCL12 WNT2 ACVR…
REGULATION_OF_G_PROTEIN_COUPLED_RECEPTOR_SIGNALING_PATHWAY	0.0015456	0.0135741	0.441094	1.73866	0	129	51	C3 PLCB1 TMOD2 MRAP RGS2 YWHAB MGLL MET PLCE1 ACPP RGS5 RGS16 ATP2B4 GNAI2 ADM LRRK2 ARRB1 BICD1 CCL5 CAV2 EDN1 PLEK RGS14 APLN ROCK1 ADA GRK5 F2 RGS3 PPP1R9B ARRDC3 RGS9 GNG4 DNM1 FZD2 GIT2 RGS10 CNTN2 NMT2 RPGRIP1L GRK6 GPR27 STMN1 SSTR4 USP33 RGS18 ARRB2 CAMKMT GIT1 RGS1 SNCA
NEGATIVE_REGULATION_OF_CELLULAR_RESPONSE_TO_GROWTH_FACTOR_STIMULUS	0.0015625	0.0135741	0.441082	1.74076	0	135	53	DCN SFRP1 SULF2 TGFBR2 FAM129B CD109 SFRP2 CHRDL1 FZD1 NEDD4 GREM2 CHST11 CAV1 ADAMTS12 NBL1 TWSG1 SULF1 TNMD TGFB1 THBS1 GLG1 CTDSPL2 RBPMS2 CASK TGFB1I1 CREB3L1 CAV2 FBN2 SMURF2 BAMBI APLN PRDM16 SLIT2 VWC2 CIDEA CFLAR ASPN LTBP1 CADM4 SMAD3 SKIL SOSTDC1 PTPN1 TGFBR3 LRP2 SKI SMURF1 AGT GATA3 GREM1 HTRA1 HRG HIPK2
MEMBRANE_LIPID_METABOLIC_PROCESS	0.0015528	0.0135741	0.44086	1.81542	0	181	81	KIT SGPL1 SGMS2 AGMO GM2A CYP1B1 ELOVL5 ASAH1 ASAH2 TNFRSF1A SPTLC2 ELOVL4 ST8SIA6 GLTP SMPD3 ACER2 PRKD3 CERK PSAPL1 ALDH3B2 SERINC3 PPT1 CERS6 ORMDL3 P2RX7 SERINC5 ESYT1 PGAP1 ELOVL6 NAGA ST6GALNAC5 B4GALT6 GLB1 B3GALT2 HEXB GALC B3GALNT1 CERS5 FA2H SPTLC3 B4GALNT1 SGPP1 ARSA ACER3 ELOVL1 CERS2 ITGB8 DEGS1 PIGN MGST2 ESYT2 TNF SGPP2 ST3GAL4 SGMS1 MPPE1 ALDH3B1 PLA2G15 SPTLC1 UGCG PIGH SPHK1 ELO…
KIDNEY_EPITHELIUM_DEVELOPMENT	0.0015674	0.0135741	0.440697	1.73812	0	137	68	SFRP1 MAGED1 EPCAM GPC3 IQGAP1 PECAM1 BASP1 PKD2 SMO TACSTD2 TGFB1 ADIPOQ PBX1 OSR1 MYO1E CD34 MTSS1 WT1 FGFR2 WWTR1 SDC1 STAT1 CAT MYC WNT7B GLI3 AHI1 CALB1 WNT2B BCL2 SLIT2 IRX1 PTCH1 SMAD3 IRX2 SALL1 PAX2 BMP7 RET WNT6 FMN1 TCF21 HOXA11 NPNT DCHS1 GDNF PROM1 CXCR2 CITED1 AGT PODXL MAGI2 GATA3 EPHA4 GREM1 FGF2 ARG2 SDC4 SIM1 PTPRO AQP11 TFAP2B KANK2 NOTCH1 HOXB7 FOXC1 HNF1B PAX8
REGULATION_OF_EPITHELIAL_CELL_DIFFERENTIATION	0.0015528	0.0135741	0.439982	1.72063	0	122	53	CCND1 CD109 PRKX CAV1 TNFRSF1A ZEB2 SMO ADIPOQ ESRP1 MAFF CDSN OSR1 VDR ADD1 SFRP4 WWTR1 CEACAM1 H2AFY2 STAT1 ZFP36L1 AHI1 GRHL1 S1PR2 ACVRL1 CDKN1C GRHL2 ERRFI1 ROCK1 PTCH1 APOLD1 RUNX1 TNF PAX2 MSX2 AQP3 ZEB1 GDNF PROM1 CTSL CITED1 PRKCH GATA3 TMEM100 MMP9 CTSK SFN XDH NOTCH1 FOXC1 PAX8 BTG1 CLOCK SULT2B1
POSITIVE_REGULATION_OF_PEPTIDE_SECRETION	0.00154799	0.0135741	0.439917	1.84782	0	231	104	AACS TLR8 RAB8B POSTN NADK IGF1 MBP CSF1R F2R DHX9 IL17RC TM7SF3 EZR TLR4 SOX4 TGFB1 SRI PTPN22 LGALS9 EGFR F2RL1 PYCARD SYK CASP1 CD34 P2RX7 IFIH1 IL1RAP CD14 DDX58 LRRK2 ABAT IL17RA FGB FGA CD38 ADAM8 FGR GOLPH3L ORM1 MAPK3 IL17RB TRPV4 ARRB1 MYRIP SERP1 SCAMP5 C1QTNF3 TNFRSF14 CD274 MYH10 RBP4 GLUD1 FGG IRS2 ANO1 VTCN1 HK1 JAK2 SPTBN1 MAPK11 FERMT1 APLN CLEC9A BLK CD2 IL33 HIF1A TLR1 CLEC5A RA…
CONTRACTILE_ACTIN_FILAMENT_BUNDLE_ASSEMBLY	0.00318979	0.0202312	0.439902	1.63544	1	90	43	SFRP1 NOX4 SH3PXD2B MET LPAR1 EVL ZYX TACSTD2 APOA1 TMEFF2 DLC1 S1PR1 BAG4 ARRB1 PTK2B SORBS1 WAS LIMK1 ALMS1 PPM1F CD47 WASF2 GPR65 RHOA ROCK1 BRAF FHDC1 PPP1R9A SMAD3 MYOC ARAP1 S100A10 ARHGEF10 SRC SERPINF2 ARHGEF5 SLC9A1 ARHGAP6 SDC4 PHACTR1 PHLDB2 PTGER4 STMN1
REGULATION_OF_ANION_TRANSPORT	0.00321027	0.0202312	0.439705	1.60656	1	80	23	APOE AKT1 RGS2 ARL6IP1 RIPK1 STK39 PTAFR P2RX4 PRELID1 THBS1 OSR1 SYK APOA1 P2RX7 PSEN1 AVPR1A ABAT SFRP4 STXBP1 STC1 KMO EDN1 IRS2
SENSORY_SYSTEM_DEVELOPMENT	0.00147493	0.0135741	0.439329	1.91535	0	324	135	CLIC4 MAN2A1 TGFBR2 C3 RHOJ PDGFRA SH3PXD2B KERA MERTK CYP1B1 CHRDL1 ITGAM PRKCI NTRK2 SMOC1 GNB1 C1QA EFEMP1 TWSG1 SERPINF1 SEMA3A ZEB2 VIM ALDH1A3 TGFB1 TBC1D20 EGFR GPM6A MEIS2 PTPRM ATP2B4 FAT1 STRA6 XRN2 PSEN1 WT1 SLC7A11 BCAR3 EPHB2 COL8A2 SHROOM2 ATF6 THY1 NIPBL RAB11FIP4 LAMC3 WNT7B GLI3 ALDH1A2 AHI1 MYH10 RBP4 P2RY12 FBN2 CALB1 STAT3 WNT2B WNT2 ACVRL1 FZD4 BCL11B HIPK1 LRP6 BCL2 PTN BMPR…
POSITIVE_REGULATION_OF_TYPE_I_INTERFERON_PRODUCTION	0.00643087	0.0329807	0.439278	1.5851	3	73	30	TLR8 ZBP1 TLR7 DHX9 TLR4 PLCG2 IRF5 IRF7 PTPN22 SYK TLR9 IFIH1 CD14 TMEM173 DDX58 TLR3 STAT1 NFKB1 ZCCHC3 MMP12 PTPN11 HMGB2 IRF1 STAT6 SETD2 RELA DHX58 TBK1 TLR2 MYD88
ORGANIC_HYDROXY_COMPOUND_BIOSYNTHETIC_PROCESS	0.00155521	0.0135741	0.439185	1.83889	0	228	104	APOE POR MYO5A PLCB1 HDC ASAH1 SRD5A3 ACACA ASAH2 PLCE1 PSAT1 ADCYAP1R1 SPTLC2 ACLY DHCR24 SLC27A2 PTAFR ACER2 ZEB2 PLCG2 HMGCS2 SP1 MOXD1 CYB5R3 PLTP APOA1 PCK1 SQLE VDR ALOX15 SREBF2 HMGCR ELOVL6 SLC7A11 APOB EPHX1 PLCB3 FASN PTK2B STARD4 ISYNA1 PLCB4 TPH1 ERLIN2 PLEK ACER3 ABCG1 NFKB1 KPNB1 HAND2 MBTPS1 NFYA CDH3 SCAP ERLIN1 PPIP5K2 TRPC1 PAH TNF PCK2 PRKAG2 HSD3B7 INSIG1 GFI1 SPTLC1 SPHK1 NR4…
RECEPTOR_METABOLIC_PROCESS	0.00153374	0.0135741	0.43914	1.78746	0	167	73	APOE PPARG NEDD4 FCER1G CAV1 RAB31 CD9 EZR ITGB2 PLCG2 TGFB1 ADIPOQ LGMN ANXA2 DTX3L SYK PSEN1 ADM AP2B1 SNX1 ANKRD13A SFRP4 NSF CEACAM1 PICALM ARRB1 CALCRL UVRAG AHI1 EDN1 SCYL2 TBC1D5 OPHN1 RSPO1 APLN CD36 SCAP HIF1A SDCBP CD81 HNRNPK ITGB3 HDAC1 TNF FMR1 ECE1 ITCH ARAP1 PTPN1 MYLIP USP46 CLTA NSG1 CXCR2 SMURF1 MTMR2 ITGB1 MAGI2 DNM1 ZNRF3 GREM1 SELE SH3GL2 CNTN2 CLTC LDLRAP1 LRP1 RAB5A GRIA1 H…
NEGATIVE_REGULATION_OF_EXTRINSIC_APOPTOTIC_SIGNALING_PATHWAY	0.0031746	0.0202312	0.439034	1.64618	1	95	37	ITGA6 SFRP2 CTNNA1 AKT1 IGF1 RIPK1 FYN EYA2 THBS1 CASP8 LGALS3 TNFAIP3 CX3CL1 HGF FGB GCLC FGA PF4 FGG PELI3 IL7 BCL2 FGF10 ICAM1 CFLAR SH3RF1 HMOX1 HMGB2 TNF CTTN BRCA1 BCL2L1 GDNF SRC RELA BMP5 EYA3
REGULATION_OF_DEFENSE_RESPONSE	0.00137363	0.0135741	0.438573	2.00822	0	630	279	APOE IFNGR1 PPARG C3 XIAP SERPING1 IL1RL2 PTGIS TRIM44 ANXA1 TLR8 IL6ST ZBP1 COLEC12 ITGAM UNC93B1 IGF1 ESR1 MGLL TLR7 CTSB FCER1G IL1R1 APP CAV1 PIK3AP1 ADAMTS12 TNFRSF1B IRF4 RIPK1 TNFRSF1A GRN HSP90B1 LYN C1QA RNF125 ABCD2 OSMR STK39 PSMB8 NT5E CMA1 FYN PIK3CG SERPINF1 DHX9 APOD IL17RC AHSG CLEC7A FCGR2B CTSS ENPP3 TLR4 DNASE1L3 PENK ZYX RSAD2 MNDA TLR5 ITGB2 PLCG2 PTGER3 ADIPOQ LGMN TGM2 SIRP…
TISSUE_MIGRATION	0.00149477	0.0135741	0.438384	1.87294	0	265	128	DCN APOE TGFBR2 ARSB PPARG KIT RHOJ PIK3C2A MAP4K4 ANXA1 CYP1B1 DPP4 AKT1 CTSH MET SEMA4A PRKX GRN PECAM1 ENPP2 SPRED1 P2RX4 SERPINF1 SEMA3A DOCK5 ACTG2 EVL ZEB2 ACTA2 ITGB2 TACSTD2 ADTRP SP1 TGFB1 LGMN PRCP THBS1 CORO1B SEMA5A EMP2 PTPRM APOA1 ANGPT2 CORO1C LOXL2 CEACAM1 PTK2B ITGA2 STC1 GLIPR2 ROBO1 CALR EDN1 RAB25 DOCK1 STARD13 PPM1F ACVRL1 FERMT1 NRP2 AKT3 SLIT2 BMPR2 RHOA FGF10 GRHL2 HIF1A F…
SKELETAL_SYSTEM_MORPHOGENESIS	0.00154321	0.0135741	0.438362	1.83887	0	225	80	SFRP1 POR COL14A1 TGFBR2 SCARA3 PDGFRA SGPL1 SH3PXD2B SFRP2 COMP COL12A1 CHST11 MMP14 PAPPA2 SMPD3 VIT ARID5B MATN2 TGFB1 ACP5 ANXA2 OSR1 P2RX7 PSEN1 GLG1 SHOX2 MGP FGFR2 TIFAB SFRP4 MMP2 FGR TRPV4 NIPBL STC1 GLI3 ZMPSTE24 FBN2 MTHFD1L NAB1 THBS3 LRP6 CHAD BMPR2 PRKRA PAX5 GRHL2 COCH SMAD3 CHSY1 ROR2 COL11A1 IRX5 HOXB2 BMP7 AUTS2 LTF IFT80 TEK COL27A1 FMN1 DLX5 MSX2 INSIG1 ZEB1 OSR2 SETD2 WDR19 F…
REGULATION_OF_ENDOCYTOSIS	0.00155039	0.0135741	0.438345	1.81742	0	187	80	APOC1 AXL APOE ACTN4 PPARG C3 B2M GPC3 MCTP1 NCKAP1L CAV1 RAB31 DAB2 STON1 PLCG2 CD300A ANXA2 LGALS3 PPT1 F2RL1 SYK ALOX15 ANKFY1 CD14 CBL AP2B1 LRRK2 ANKRD13A SFRP4 PICALM ARRB1 SCAMP5 ZFYVE16 EHD4 STAP1 ITGA2 BICD1 AHI1 ANO6 CD2AP DNAJC6 SCYL2 TBC1D5 OPHN1 RSPO1 APLN RAB5C CD36 APOC3 ROCK1 SDCBP EPHA3 HNRNPK ITGB3 SH3GL3 FMR1 PTPN1 STX1B TSPAN1 USP46 CD177 SRC MTMR2 MAGI2 ARF6 DNM1 GREM1 HIST1H…
TRANSMEMBRANE_RECEPTOR_PROTEIN_TYROSINE_KINASE_SIGNALING_PATHWAY	0.00136612	0.0135741	0.438261	2.01024	0	638	271	CYBB DCN AXL SULF2 IGFBP4 PTPRJ LOX KIT IGFBP3 PLCB1 PIK3C2A FLRT2 DDR2 ARPC1B PDGFRA MYOF SGPL1 FAM129B MERTK SIK2 SORT1 RASSF2 SH2B2 PDGFC AKT1 IQGAP1 NCF1 REPS2 NCKAP1 RARRES2 NCKAP1L EPS8 NEDD4 IGF1 PLAT MET APP ADAMTS12 PLCE1 NTRK2 LYN PTPRA EFEMP1 PTBP1 CSF1R MYO1C VAV2 ARF4 SULF1 FYN PIGR SPRED1 KLB SMPD3 APOD ARID5B TNMD GFRA1 AHSG PRLR PRKCB TGFA CCND3 GAB2 ITGA1 PID1 TGFB1 ADIPOQ LGMN S…
DICARBOXYLIC_ACID_TRANSPORT	0.00315457	0.0202312	0.438237	1.62439	1	86	22	SLC25A10 SLC1A3 ARL6IP1 LRRC8D NTRK2 APBA1 FOLR2 P2RX7 PSEN1 SLC13A4 AVPR1A ABAT SLC25A32 LRRC8C SLC7A11 STXBP1 SLC25A30 KMO SLC46A1 LRRC8E SLC26A2 PPFIA4
NEGATIVE_REGULATION_OF_LEUKOCYTE_DIFFERENTIATION	0.00318471	0.0202312	0.438128	1.61649	1	85	42	SFRP1 ANXA1 TMEM176B LYN C1QC FCGR2B TLR4 TMEM176A CD74 ADIPOQ INPP5D DTX1 LRRC17 LILRB3 TLR3 CEACAM1 MYC ID2 GLI3 RUNX3 LILRB4 LOXL3 UBASH3B RUNX1 IRF1 LTF SOCS1 PGLYRP2 IHH NFKBID GPR68 TBX21 CDK6 ZFPM1 GPR55 GATA2 FSTL3 CCL3 CTLA4 ZC3H12A INHBA FOXJ1
DENDRITIC_SPINE_DEVELOPMENT	0.00322061	0.0202312	0.437795	1.60798	1	84	39	APOE ASAP1 LPAR1 ARF4 ADAM10 CFL1 DOCK10 CAPRIN1 BHLHB9 PSEN1 UBA6 LRRK2 RELN PAK2 EPHB2 SHANK2 DBN1 PAK3 SRGAP2 SIPA1L1 PPP1R9A ZMYND8 NGEF DLG5 FMR1 ABI2 PAK4 PTEN MAPK6 CTNND2 ARF6 EPHA4 ACSL4 ITPKA LRP8 ACTR2 CAPRIN2 HDAC6 DNM3
POSITIVE_REGULATION_OF_IMMUNE_RESPONSE	0.00138504	0.0135741	0.437776	2.00689	0	645	279	CFH PTPRJ C3 C2 PROS1 XIAP SERPING1 CFB ARPC1B SCARA3 B2M SH2B2 ANXA1 TLR8 IL6ST ZBP1 C1S COLEC12 C1QB NCKAP1 NCKAP1L ITGAM UNC93B1 ESR1 TLR7 CTSB FCER1G IL1R1 CAV1 PIK3AP1 C6 IRF4 RIPK1 HSP90B1 LYN C1QA RNF125 MYO1C C1QC PSMB8 WIPF1 VAV2 FYN PTAFR BTNL9 DHX9 CLEC7A FCGR2B CTSS C3AR1 PRKCB EZR TLR4 C4B RSAD2 MASP1 GAB2 MNDA TLR5 ITGB2 PLCG2 CMTM3 CD74 TGFB1 LGMN CARD11 CD300A C1RL IRF7 TNFRSF13C …
SECRETION	0.00121951	0.0135741	0.437675	2.09523	0	1404	516	FGL2 MMRN1 MME CYBB SFRP1 AXL ACTN4 DSP TIMP2 CD68 PTPRJ MYO5A EEF1A1 ARSB C3 KIT GNS GAS6 PROS1 ALB PIK3C2A SERPING1 UCP2 ILDR2 CCND1 MAP4K4 FAM129B GM2A MERTK CD109 CD44 B2M AACS ACTN1 ANXA1 TLR8 COMP RAB8B SLC1A3 VAT1 ENDOD1 POSTN DPP4 PYGB IQGAP1 MCTP1 PGRMC1 ASAH1 RARRES2 CTSH NCKAP1L NADK ITGAM SCRN1 IGF1 CTSC CCR1 PRKCI IQGAP2 CMTM6 CTSB FCER1G APP PLAC8 CAV1 NAAA LGALS3BP TNFRSF1B CCL8 MB…
EXTRINSIC_APOPTOTIC_SIGNALING_PATHWAY	0.00155039	0.0135741	0.437616	1.81855	0	201	81	SFRP1 SORT1 ITGA6 SFRP2 CTNNA1 AKT1 IGF1 CAV1 TNFRSF1B RIPK1 TNFRSF1A FYN PDIA3 EYA2 TIMP3 PPP2R1B TGFB1 THBS1 CASP8 LGALS3 PYCARD P2RX7 TNFAIP3 LCN2 PTPRC CX3CL1 HGF TLR3 FGB GCLC FGA PAK2 DAPK1 CASP3 PF4 SRPX FGG PELI3 SGPP1 JAK2 IL7 ERBB3 CASP8AP2 KRT8 HIPK1 BCL2 STK4 FGF10 BID ICAM1 IL33 CFLAR SH3RF1 DEPTOR STK3 HMOX1 SMAD3 FOXO3 SKIL HMGB2 TNF CTTN BCL2L11 MAL RET BRCA1 PML TRAF1 BCL2L1 PMAI…
CELLULAR_RESPONSE_TO_ANTIBIOTIC	0.0015528	0.0135741	0.437498	1.7149	0	126	67	CYBB AXL ANXA1 CYP1B1 ADCY3 MET RIPK1 PLA2G4A MAP3K5 SMPD3 XRN1 SIRPA ATP7A NET1 TNFAIP3 LCN2 AHR HGF LRRK2 SIGMAR1 ADCY7 EGR1 FABP1 KCNMB1 MAPK13 EFNA5 GNAI1 PDGFD TRPM2 FOXO3 ARG1 RIPK3 NFE2L2 PAX2 ADCY5 NR4A3 ADCY1 STAT6 ITPR2 CCL7 UGT1A1 SPHK1 SRC PTEN RELA CRIP1 IL18BP PAWR SLC9A1 KLF4 RNF112 MYB ACTR2 PDE8A CLU SETX PRKAA1 HDAC6 KLF2 HSPA5 ECT2 RHOB FOXO1 ZC3H12A ADCY6 PCNA IL18RAP
EPITHELIAL_TUBE_MORPHOGENESIS	0.00149254	0.0135741	0.437348	1.88885	0	300	128	CLIC4 SFRP1 TGFBR2 MAGED1 SFRP2 GPC3 CTSH FZD1 LUZP1 ST14 ESR1 MET PRKX ADAMTS12 TNC CSF1R MMP14 PTK7 CFL1 NTN1 PKD2 ZEB2 SMO TACSTD2 SOX4 TGFB1 GNA13 PBX1 CELSR1 PLXNB2 OSR1 MTSS1 VDR PSEN1 ADM WT1 DLC1 SHROOM3 FGFR2 PGR CSF1 SEMA3E EDNRA RBPJ MYC GLI3 AHI1 EDN1 FZD3 SPINT1 STARD13 MTHFD1L SPINT2 WNT2B WNT2 ACVRL1 APAF1 LRP6 BCL2 HAND2 SLIT2 STK4 RHOA FGF10 ESRP2 IRX1 GRHL2 FZD6 HIF1A PTCH1 STK3…
NEGATIVE_REGULATION_OF_VIRAL_PROCESS	0.00803859	0.0390963	0.437164	1.57746	4	73	39	IFITM2 ISG20 CCL8 IFITM3 TRIM14 RSAD2 ZC3HAV1 GSN RNASEL BST2 MID2 IFITM1 TRIM59 STAT1 TRIM10 TRIM21 OAS3 CCL5 EIF2AK2 FAM111A IFIT1 HDAC1 TNF LTF PML PLSCR1 TRIM25 HMGA2 TRIM62 PROX1 ISG15 MBL2 SLPI CHMP3 TRIM6 CCL3 CCL4 ZC3H12A POU2F3
RESPONSE_TO_MECHANICAL_STIMULUS	0.00155039	0.0135741	0.437063	1.81697	0	195	76	DCN TGFBR2 PPARG KIT TLR8 PIEZO2 SLC1A3 POSTN AKT1 TLR7 ASNS TNC TNFRSF1A MMP14 FYN PKD2 TLR4 TLR5 TGFB1 THBS1 KCNK2 EGFR CASP8 MEIS2 CASP1 P2RX7 STRA6 ANGPT2 CHI3L1 RETN CNN2 TLR3 TIFAB GCLC JUNB MAPK3 ACTG1 TRPV4 PTK2B STAT1 ITGA2 ETV1 ATP1A1 EDN1 MBD2 CXCL12 MAP3K14 CASP8AP2 NFKB1 CYBA GDF5 ABHD12 RHOA SCEL FOXP2 IGFBP2 XPC PTCH1 KCNA1 MAP3K2 PTPN11 COL11A1 CCNB1 FOSB HDAC4 IRF1 SLC2A1 CD40 MT…
POSITIVE_REGULATION_OF_MULTICELLULAR_ORGANISMAL_PROCESS	0.00119617	0.0135741	0.436986	2.0993	0	1516	630	MME CYBB MAN2A1 AXL APOE SULF2 POR TIMP2 NEGR1 PTPRJ TGFBR2 ARSB PPARG C3 KIT PLCB1 RHOJ GAS6 PIK3C2A FLRT2 GPM6B DDR2 UCP2 IL1RL2 LEPR PTGIS CCND1 MAP4K4 MAGED1 SH3PXD2B FAM129B HEG1 B2M ANXA1 TLR8 IL6ST SFRP2 ZBP1 CYP1B1 RAB8B POSTN BSCL2 PDGFC AKT1 IQGAP1 CLIC1 RGS2 DPYSL3 CTSH NCKAP1L FZD1 IGF1 CCR1 PRKCI TLR7 FCER1G IL1R1 MET SEMA4A APP PLAC8 CAV1 C6 LPAR1 MBP CAMK1D ARHGDIA IRF4 RIPK1 NTRK2…
NEURON_PROJECTION_ORGANIZATION	0.00647249	0.0331478	0.436752	1.58152	3	78	37	APOE APP ABCD2 FYN ADAM10 CFL1 FCGR2B LGMN DOCK10 ATP1A3 CAPRIN1 BHLHB9 PSEN1 LRRK2 RELN EPHB2 SHANK2 DBN1 PAK3 SIPA1L1 TANC1 PPP1R9A ZMYND8 NGEF CTTN ABI2 ITGA3 PTEN MTMR2 CTNND2 EPHA4 ITPKA LRP8 ACTR2 CAPRIN2 HDAC6 DNM3
POSITIVE_REGULATION_OF_CELL_DIFFERENTIATION	0.00131234	0.0135741	0.436204	2.03665	0	856	359	MME MAN2A1 SFRP1 AXL CXCL9 APOE POR TIMP2 NEGR1 TGFBR2 ARSB PPARG KIT IGFBP3 PLCB1 GAS6 DDR2 IL1RL2 SH3PXD2B FAM129B ANXA1 IL6ST SFRP2 CTNNA1 AKT1 IQGAP1 CLIC1 RGS2 DPYSL3 RARRES2 NCKAP1L FZD1 IGF1 CCR1 PRKCI APP LPAR1 CAMK1D ARHGDIA RIPK1 NTRK2 GRN NBL1 TYROBP LYN C1QA PTPRD MMP14 MAP3K5 GCNT2 DAB2 FYN P2RX4 PTK7 SERPINF1 SEMA3A DOCK5 NTN1 ZEB2 PDE5A SMO TCF12 CD74 TACSTD2 TGFB1 ADIPOQ PLXNA4 PR…
CHLORIDE_TRANSMEMBRANE_TRANSPORT	0.00649351	0.0332323	0.436123	1.57269	3	75	18	CLIC4 GABRA3 SLC1A3 CLIC1 CLCA2 CLCN5 CLDN4 TTYH3 CLIC6 ANO6 CLCA1 ANO1 SLC1A4 FXYD3 GLRB SLC26A2 SLC12A7 CASR
POSITIVE_REGULATION_OF_NF_KAPPAB_TRANSCRIPTION_FACTOR_ACTIVITY	0.0015625	0.0135741	0.436095	1.72839	0	141	70	PRKCI APP CAV1 RIPK1 DHX9 PRKCB TLR4 TRIM14 ITGB2 TGFB1 CARD11 LGALS9 PYCARD IRAK3 TLR9 IL1RAP CX3CL1 TLR3 MID2 IRAK2 ADAM8 BTK RIPK4 CAT EDA IRAK4 STAT3 EIF2AK2 NFKB1 CD36 ICAM1 CFLAR TAB3 TRIM37 RIPK3 TNF IL18R1 MALT1 LTF KRAS AIM2 CD40 RPS6KA4 MTPN TRAF1 SPHK1 TRAF5 ROR1 RELA IL18 PRKCZ AGT PRKCH GREM1 TLR2 CX3CR1 TRIM25 MYD88 TRAF6 TRIM62 HSPA1B PRKD1 TLR6 CLU S100A8 NFKB2 TNFRSF11A RBCK1 CLO…
RETINA_DEVELOPMENT_IN_CAMERA_TYPE_EYE	0.00155521	0.0135741	0.435403	1.71154	0	128	45	CLIC4 MAN2A1 RHOJ PDGFRA MERTK CYP1B1 NTRK2 GNB1 SERPINF1 GPM6A PTPRM ATP2B4 XRN2 PSEN1 THY1 RAB11FIP4 LAMC3 AHI1 MYH10 RBP4 CALB1 ACVRL1 FZD4 HIPK1 LRP6 PTN BMPR2 HIF1A CDON PAX2 IRX5 RET FJX1 DIO3 PROM1 TUB IHH BMPR1B SKI MAX TFAP2A TTLL5 HIPK2 SMARCA4 ATP2B1
FOREBRAIN_DEVELOPMENT	0.00144718	0.0135741	0.435395	1.90596	0	339	130	AXL PLCB1 LAMB1 ITGAM APP LPAR1 NTRK2 TYROBP DCLK1 CSF1R TACC1 TWSG1 FYN SEMA3A MYO1D CDH1 OXTR ZEB2 ALDH1A3 SMO GNG12 PLXNA4 EXT1 DOCK7 SEMA5A EGFR ATP7A ATP2B4 ARPC5 XRN2 PSEN1 AVPR1A UBA6 LRRK2 DLC1 PGAP1 FGFR2 RELN MFSD2A SLC7A11 EPHB2 CASP3 TTC21B MDK RBPJ DUOX2 ID2 WNT7B CREB1 GLI3 ROBO1 ALDH1A2 MYH10 P2RY12 EMX2 SRGAP2 OPHN1 DIXDC1 WNT2B CXCL12 NRP2 ATRX BCL11B APAF1 FLNA LRP6 PTN PHLPP2 C…
ARTERY_DEVELOPMENT	0.00488599	0.0269795	0.434913	1.58489	2	81	39	APOE LOX COMP LUZP1 PKD2 SOX4 STRA6 HPGD AP2B1 APOB RBPJ GLI3 ROBO1 MYH10 ACVRL1 LOXL1 HAND2 AKT3 BMPR2 LTBP1 MYLK ZMIZ1 GJA5 LRP2 ENG NDST1 MYOCD PRDM1 SUFU ARID2 ADAMTS9 PRICKLE1 PROX1 LRP1 ADAMTS6 ANGPTL3 TFAP2B NOTCH1 FOXC1
REGULATION_OF_ACTIN_FILAMENT_ORGANIZATION	0.0015456	0.0135741	0.434705	1.82415	0	230	103	SFRP1 LIMA1 NOX4 ARPC1B TMOD2 SH3PXD2B DSTN NCKAP1 NCKAP1L EPS8 IQGAP2 MET LPAR1 MYO1C TMOD3 WIPF1 CFL1 EVL SWAP70 TACSTD2 PREX1 HCK CORO1B SEMA5A GSN ADD3 F2RL1 PYCARD CYFIP1 HCLS1 VILL APOA1 TMEFF2 ARPC5 CAPZA1 ALOX15 ADD1 CX3CL1 DLC1 S1PR1 MYADM BAG4 GMFB PTK2B CDC42EP4 TWF1 WAS ACTR3 PLEK LIMK1 PAK3 ALMS1 SPTBN1 PPM1F CXCL12 SPTAN1 CD47 WASF2 SPIRE1 FLNA GPR65 SLIT2 GMFG RHOA ICAM1 ROCK1 BRAF…
CELLULAR_RESPONSE_TO_ACID_CHEMICAL	0.00154799	0.0135741	0.434463	1.80174	0	186	75	CYBB SFRP1 PPARG PDGFRA PDGFC AKT1 GNG2 ADNP2 CLDN1 ACACA NTRK2 TNC CPT1A GNB1 LYN FYN PTAFR PTK7 SERPINF1 FOLR2 PKD2 ABCA1 PID1 PTGFR EGFR OSR1 ATP7A PCK1 ATM AVPR1A SLC6A4 FGFR2 GCLC MMP2 EGR1 APOB PTK2B KCNMB1 SESN3 WNT7B CREB1 ALDH1A2 EDN1 PTGER2 UCP1 FZD10 CAPN2 WNT2 FZD4 BCL11A CYBA SH3BP4 E2F1 PDK3 RRAGC EPHA3 DNMT1 PDGFD CPS1 TNF PPARGC1A PAX2 CCNB1 RET WNT6 SOCS1 LDLR ZEB1 SESN2 BCL2L1 G…
HOMEOSTASIS_OF_NUMBER_OF_CELLS	0.0015456	0.0135741	0.434373	1.81633	0	218	103	AXL PTBP3 KIT ILDR2 DOCK11 MERTK B2M RASSF2 SH2B2 ANXA1 AKT1 NCKAP1L LIPA FCER1G LYN TMOD3 F2R SFXN1 SMO CD74 TGFB1 CARD11 DOCK10 TNFRSF13C INPP5D LGALS9 SASH3 HCLS1 P2RX7 TNFAIP3 RB1 SENP1 ADD1 IKZF1 SLC7A11 MFHAS1 L3MBTL3 CSF1 CASP3 TAL1 STAT1 TRIM10 NCAPG2 TNFSF13B ID2 ZFP36L1 BCR IL7R JAK2 IL7 STAT3 IL2RA BCL2 AKT3 RHAG FLT3 GPR183 HIF1A ADA HMOX1 FOXO3 PTPN11 SKIL GPR174 HMGB2 RIPK3 BCL2L11 …
REGULATION_OF_NEUROTRANSMITTER_LEVELS	0.0014881	0.0135741	0.434076	1.87543	0	299	123	POR CHDH GPM6B PTGIS CYP1B1 SLC1A3 AKT1 HDC RGS2 MCTP1 ARL6IP1 BCHE DPYD CAV1 NAAA CADPS2 SLC38A1 APBA1 P2RX4 RAP1B PRKCB PKD2 TLR4 ITGB2 SIRPA CPLX2 ACP5 MOXD1 PPT1 ATP7A BHMT CD34 ATP2B4 P2RX7 SARDH ADORA2B PSEN1 SLC44A1 LRRK2 ABAT SLC6A4 NAALAD2 SLC7A11 STXBP1 CASK MCTP2 PTK2B SYN2 TPH1 KMO EDN1 ALDH9A1 JAK2 STX11 KLRK1 CD47 TSPO CD36 ICAM1 PPFIA4 KCNMB4 BRAF SEPT5 PREPL UPB1 PPP1R9A ENPP6 SMA…
CELLULAR_RESPONSE_TO_CALCIUM_ION	0.00655738	0.0333622	0.434065	1.56245	3	76	37	CLIC4 IQGAP1 SLC25A24 CPNE8 PKD2 LGMN DPEP1 ALOX5AP ALOX15 ADD1 CHP2 MEF2A JUNB CPNE3 EDN1 BRAF TRPM2 FOSB ADCY1 SLC25A23 NCSTN SCN5A CPNE1 ACER1 RASAL1 SYT12 KCNH1 PRKAA1 ITPKB HSPA5 SYT7 ECT2 NLGN1 WNK1 SYT15 CAMK2D WNT5A
REGULATION_OF_GLIOGENESIS	0.00157978	0.0135741	0.433969	1.66357	0	107	49	PPARG IL6ST PRKCI APP LYN C1QA P2RX4 TGFB1 CSF1 STAP1 ID2 CREB1 P2RY12 SPINT1 TSPO PTN CERS2 E2F1 C5AR1 GPR183 TENM4 HDAC1 TNF F2 CCR2 TREM2 DAB1 LDLR LRP2 RELA TTBK1 SKI WDR1 PRKCH EPHA4 TLR2 CX3CR1 ID4 RNF112 CDH2 CNTN2 MYB LRP1 DAAM2 NOTCH1 TNFRSF21 PTPRZ1 GFAP CCL3
POSITIVE_REGULATION_OF_SYNAPTIC_TRANSMISSION	0.00154083	0.0135741	0.432516	1.73492	0	150	64	MME APOE SLC1A3 APP NTRK2 TYROBP OXTR LGMN EGFR CLSTN1 RETN ABAT RELN STXBP1 EPHB2 FAM107A PTK2B CLSTN3 CREB1 KMO SHANK2 CALB1 RGS14 PTN BRAF SLC8A3 PPP1R9A S100B ROR2 TNF FMR1 STX1B CCR2 CCL2 ADCY1 NCSTN IGSF9B CACNA1D CNR1 NSG1 IGSF11 PTEN CLSTN2 PRKCZ HAP1 NRXN1 EPHA4 CX3CR1 UNC13B GRIK2 CACNB3 MPP2 CACNB2 SYT12 ADORA2A ARRB2 ADRA1A KIF5B GFAP SYT7 SNCA ITPR3 NLGN1 CUBN
REPRODUCTIVE_SYSTEM_DEVELOPMENT	0.00144718	0.0135741	0.432335	1.91128	0	378	145	MME DCN SFRP1 AXL PPARG KIT PDGFRA PTGIS CCND1 SGPL1 MERTK ANXA1 SFRP2 CTNNA1 NRIP1 SLIT3 AKT1 ST14 ESR1 CTSB FNDC3A TNC MMP14 SULF1 SERPINF1 SEMA3A ARID5B KRT19 BASP1 PKD2 PSAPL1 NCOA4 ADAM15 MMP19 TBC1D20 EGFR CASP8 SERPINB5 OSR1 VDR STRA6 E2F8 CEBPA RETN ADM WT1 CBL TLR3 FGFR2 TIFAB MGST1 PGR JUNB CASP3 MAPK3 ARRB1 RBPJ SDC1 NIPBL STC1 ZFP36L1 WNT7B GLI3 MAMLD1 MEN1 RBP4 RSPO3 INHBB SPINT1 GAT…
REGULATION_OF_VESICLE_MEDIATED_TRANSPORT	0.00140647	0.0135741	0.431281	1.9406	0	472	201	APOC1 AXL APOE ACTN4 PTPRJ PPARG C3 C2 GAS6 MSN MERTK B2M ANXA1 GPC3 RAB8B MCTP1 NCKAP1L ITGAM GAS1 FCER1G CAV1 CAMK1D LYN RAB31 CADPS2 DAB2 APBA1 STON1 PTAFR SMPD3 RAP1B AHSG FCGR2B PRKCB EZR C4B GAB2 ITGB2 PLCG2 IL2RG TGFB1 ADIPOQ SIRPA CPLX2 CD300A LGALS9 ANXA2 IL2RB TBC1D20 HCK LGALS3 SLC11A1 PPT1 F2RL1 PYCARD SYK APOA1 RAB3D ARHGAP1 ALOX15 GNAI2 RAC2 ANKFY1 ADORA2B CD14 PTPRC CBL SEPT8 STXBP…
SULFUR_COMPOUND_BIOSYNTHETIC_PROCESS	0.00151976	0.0135741	0.431104	1.74179	0	158	61	DCN OGN DSE ACSL5 ST3GAL1 KERA BGN HSD17B12 UGDH ELOVL5 OMD PAPSS2 ACACA CBS CHST11 SLC25A1 UST ELOVL4 ACLY CDO1 FMOD LUM SP1 ACSL1 PPT1 MAT1A VCAN ACSBG1 HPGDS ELOVL6 GSTZ1 MGST1 SLC7A11 CHST14 GCLC B3GNT3 B4GALT6 B3GNT2 FASN DSEL PDPR CHST1 PAPSS1 CHST3 CHPF ELOVL1 SLC26A2 CHST15 PDK3 MGST2 CHST12 CNDP2 CHSY1 GSTT1 NFE2L2 PRELP ST3GAL4 GLCE GGT1 B3GNT7 CHAC1
PROTEIN_PROCESSING	0.0015625	0.0135741	0.430825	1.76117	0	176	68	MME CPXM2 XIAP COMP CTSH GAS1 PLAT ENPEP ACE PERP SRGN MMP14 CMA1 PCSK6 ADAM10 CTSS ADAMTS2 ASPRV1 CLEC3B LGMN C1RL THBS1 PCSK5 ANXA2 GSN CASP8 CCBE1 AEBP1 PYCARD CASP1 P2RX7 CPD PSEN1 ADAMTS3 GLG1 CPXM1 CPA3 LRRK2 FGB FGA ADAM8 CASP3 CPZ TMPRSS2 GLI3 IL1R2 FGG DDI2 BACE2 ZMPSTE24 CTSE CAPN2 CPM PTCH1 LDLRAD3 F3 ECE1 GGT1 CHAC1 ENO1 XPNPEP3 CTSZ NCSTN APH1B MYH9 SRC PITRM1 IHH
REGULATION_OF_FAT_CELL_DIFFERENTIATION	0.00156006	0.0135741	0.43081	1.66717	0	114	39	SFRP1 PPARG SH3PXD2B SORT1 SFRP2 AKT1 LGALS12 RARRES2 TGFB1 ADIPOQ MEDAG CCDC3 ZBTB7C JDP2 CEBPA ZFP36L2 ENPP1 WWTR1 TGFB1I1 TRPV4 ID2 ZFP36L1 CREB1 TPH1 KLF5 WDFY2 PRDM16 E2F1 STK4 ADIG STK3 SMAD3 ZFPM2 TNF RORA WIF1 MSX2 INSIG1 CMKLR1
ORGANIC_ACID_TRANSMEMBRANE_TRANSPORT	0.00155521	0.0135741	0.430794	1.69343	0	128	43	SLC25A10 EMB SLC16A7 SLC1A3 AKT1 RGS2 ARL6IP1 ACACA LRRC8D SLC25A1 SLC36A4 CPT1A STK39 SLC38A1 SLC43A2 FOLR2 SLC36A2 THBS1 SLC7A1 OSR1 STRA6 PSEN1 SLC13A4 SLC25A32 LRRC8C SLC7A11 SLC7A10 PDPN SLC3A2 SLC7A5 SLC25A30 THRSP IRS2 SLC1A4 SLC46A1 SLC43A1 LRRC8E SLC1A5 SLC16A12 SLC23A2 SLC13A3 SLC6A14 SLC23A1
FORMATION_OF_PRIMARY_GERM_LAYER	0.00316957	0.0202312	0.430669	1.64365	1	104	44	LAMB1 SFRP2 COL12A1 ITGA4 MMP14 TWSG1 ITGA8 EYA2 ITGB2 FGFR2 MMP2 TAL1 ITGA2 FN1 ITGB4 GATA6 BMPR2 ELF5 MMP15 ITGB3 SMAD3 PAX2 COL11A1 EOMES BMP7 NR4A3 SETD2 ITGA3 HOXA11 COL5A2 LAMA3 ITGB1 KLF4 COL8A1 HMGA2 MMP8 SOX17 MMP9 CRB2 COL6A1 FOXC1 HNF1B LAMB3 SNAI1
POSITIVE_REGULATION_OF_DEVELOPMENTAL_PROCESS	0.00127226	0.0135741	0.430489	2.04286	0	1200	522	MME CYBB DCN MAN2A1 SFRP1 AXL CXCL9 APOE POR TIMP2 NEGR1 TGFBR2 ARSB PPARG C3 KIT IGFBP3 PLCB1 RHOJ GAS6 PIK3C2A FLRT2 GPM6B DDR2 IL1RL2 PTGIS CCND1 MAGED1 SH3PXD2B FAM129B ANXA1 IL6ST SFRP2 CTNNA1 CYP1B1 AKT1 IQGAP1 CLIC1 RGS2 DPYSL3 RARRES2 CTSH NCKAP1L FZD1 IGF1 CCR1 PRKCI SEMA4A APP TNFRSF1B C6 LPAR1 CAMK1D ARHGDIA RIPK1 NTRK2 TNFRSF1A GRN NBL1 TYROBP LYN C1QA PTPRD MMP14 MAP3K5 ENPP2 GCNT2 C…
AMINO_ACID_TRANSMEMBRANE_TRANSPORT	0.00481541	0.0267304	0.430054	1.5713	2	80	24	SLC1A3 RGS2 ARL6IP1 LRRC8D SLC36A4 STK39 SLC38A1 SLC43A2 SLC36A2 SLC7A1 OSR1 PSEN1 LRRC8C SLC7A11 SLC7A10 PDPN SLC3A2 SLC7A5 SLC1A4 SLC43A1 LRRC8E SLC1A5 SLC16A12 SLC6A14
REGULATION_OF_GTPASE_ACTIVITY	0.00144092	0.0135741	0.430043	1.91016	0	414	225	FAM13A SFRP1 PLCB1 MAP4K4 DOCK11 TBC1D9 ITGA6 RASA3 IQGAP1 RGS2 SBF2 NCKAP1L IQGAP2 CCL8 ASAP1 TBC1D2B ARHGDIA NTRK2 SRGAP1 VAV2 F2R USP6NL ARAP2 SRGAP3 RGS5 RIN2 SYDE2 PLXNA4 PREX1 DOCK7 DOCK10 RACGAP1 TBC1D20 ACAP2 ARHGAP29 PLXNB2 ARHGDIB RSU1 RGS16 F2RL1 PYCARD RALGAPA2 ARHGAP32 ARHGAP1 NET1 CORO1C CX3CL1 MYO9A ARFGAP3 DOCK2 LRRK2 DLC1 S1PR1 ARHGAP25 RAPGEF6 PKP4 ARHGAP9 PLXNC1 SEC23B PICALM F…
MYELOID_CELL_HOMEOSTASIS	0.00155039	0.0135741	0.429777	1.687	0	124	58	AXL PTBP3 KIT MERTK B2M ANXA1 NCKAP1L FCER1G LYN TMOD3 SFXN1 INPP5D HCLS1 RB1 SENP1 ADD1 IKZF1 SLC7A11 MFHAS1 L3MBTL3 CASP3 TAL1 STAT1 TRIM10 NCAPG2 ID2 ZFP36L1 JAK2 STAT3 RHAG HIF1A HMOX1 FOXO3 HMGB2 BCL2L11 ALAS2 CCR2 SP3 TGFBR3 NCSTN PKNOX1 CXCR2 AMPD3 FAM210B GATA3 DYRK3 HIPK2 PIK3CB HSPA1B CDK6 ZFPM1 ADAM17 ISG15 KLF2 ITPKB GATA1 GATA2 ANKRD54
STEROL_HOMEOSTASIS	0.0096463	0.044499	0.429602	1.55018	5	73	40	APOE LIMA1 TTC39B ACSM3 CAV1 SOAT1 NPC2 ABCA1 APOA1 SREBF2 LIPG MALL APOB EHD1 APOA2 TMEM97 ABCG1 APOC3 RORA MYLIP INSIG1 FABP4 MTTP LDLR HDAC9 EPHX2 IL18 LPL CYP7B1 LDLRAP1 GRAMD1B DGAT2 LIPC NR1H4 ANGPTL3 HNF4A APOC2 ABCA2 XBP1 APOA5
AMINO_ACID_TRANSPORT	0.0015674	0.0135741	0.429384	1.69089	0	131	36	SLC1A3 RGS2 ARL6IP1 LRRC8D NTRK2 SLC36A4 STK39 SLC38A1 APBA1 SLC43A2 SFXN1 SLC36A2 SLC7A1 SLC11A1 OSR1 P2RX7 PSEN1 AVPR1A ABAT LRRC8C SLC7A11 SLC7A10 PDPN SLC3A2 STXBP1 SLC7A5 KMO SLC1A4 SLC43A1 LRRC8E PPFIA4 SLC1A5 SLC16A12 ARG1 NFKBIE SLC6A14
CELLULAR_RESPONSE_TO_PEPTIDE	0.00145985	0.0135741	0.429029	1.87932	0	337	137	POR MYO5A PPARG PIK3C2A UCP2 SIK2 SH2B2 RAB8B ADCY3 AKT1 RARRES2 IGF1 PRKCI APP CAV1 LYN PTPRA ITGA4 MYO1C RAB31 PDE3B FYN SMPD3 RAP1B AHSG PRLR FCGR2B ANXA5 PRKCB TLR4 CCND3 PRKAR2B VIM TSHR PID1 SP1 TGFB1 ADIPOQ LGMN ATP1A3 PTPN22 VCAM1 LPIN2 CYFIP1 PCK1 KLF3 PTPRE ATP6V1A GNAI2 PSEN1 ENPP1 CSK CCNA2 GCLC ADCY7 APOBEC1 CEACAM1 EIF4EBP1 NGFR STAT1 RAB8A SORBS1 SESN3 ZFP36L1 LEPROT CREB1 MEN1 CAV…
NEGATIVE_REGULATION_OF_NEURON_PROJECTION_DEVELOPMENT	0.00156495	0.0135741	0.42884	1.69475	0	139	73	APOE DENND5A MAP4K4 B2M SEMA3D PTPN9 DPYSL3 SEMA4A ASAP1 LPAR1 ARHGDIA SEMA3F SEMA3A NTN1 GAK VIM SEMA5A PSEN1 LRRK2 CD38 EPHB2 SEMA3E NGFR TRPV4 THY1 SEMA3G SEMA4B BCL11A CERS2 SLIT2 RHOA EFNB3 SEMA3C PMP22 NGEF RAP1GAP2 ARHGAP4 STX1B MYLIP CTSZ DAB1 STMN2 RTN4RL2 GFI1 PTEN ARF6 EPHA4 SEMA6B SEMA7A LRP1 RUFY3 PTPRO ITM2C CRMP1 DNM3 KLK8 GFAP RAPGEF2 NLGN1 TRIM46 ADCY6 MAP2 CDKL3 NRP1 WNT5A NLGN3…
ACTIVATION_OF_IMMUNE_RESPONSE	0.00140252	0.0135741	0.428696	1.93786	0	511	202	CFH PTPRJ C3 C2 PROS1 XIAP SERPING1 CFB ARPC1B SCARA3 SH2B2 TLR8 C1S COLEC12 C1QB NCKAP1 NCKAP1L ITGAM UNC93B1 ESR1 TLR7 CTSB FCER1G CAV1 PIK3AP1 C6 IRF4 RIPK1 HSP90B1 LYN C1QA RNF125 MYO1C C1QC PSMB8 WIPF1 VAV2 FYN BTNL9 CLEC7A FCGR2B CTSS C3AR1 PRKCB EZR TLR4 C4B RSAD2 MASP1 MNDA TLR5 ITGB2 PLCG2 CMTM3 LGMN CARD11 CD300A C1RL IRF7 PTPN22 NFAM1 INPP5D HCK C7 CASP8 LGALS3 F2RL1 PYCARD CYFIP1 SYK …
POSITIVE_REGULATION_OF_COLD_INDUCED_THERMOGENESIS	0.00318979	0.0202312	0.428659	1.58931	1	88	40	UCP2 LEPR BSCL2 PDGFC PLAC8 CAV1 IRF4 DIO2 PRLR OXTR TSHR ADIPOQ ACSL1 SYK FABP5 LCN2 ELOVL6 ADIPOR2 GATM FFAR4 EBF2 UCP1 ALMS1 JAK2 PRDM16 CD36 GJA1 APC GRB10 PPARGC1A CCR2 KDM3A FABP4 STAT6 CMKLR1 MFAP2 IL18 ADRB3 TRPV2 SLN
CARDIAC_SEPTUM_DEVELOPMENT	0.00316957	0.0202312	0.428463	1.62437	1	101	50	TGFBR2 PARVA HEG1 SLIT3 FZD1 LUZP1 PTK7 SMO SOX4 PCSK5 STRA6 AP2B1 FGFR2 MAML1 RBPJ ID2 ROBO1 MYH10 NOTCH2 GATA6 NRP2 SLIT2 BMPR2 LTBP1 SEMA3C ZFPM2 SALL1 VANGL2 BMP7 MSX2 TGFBR3 GJA5 LRP2 FGFRL1 ENG NDST1 BMP5 GATA3 TRIP11 PRDM1 FZD2 FRS2 NOS3 SUFU PROX1 ZFPM1 ADAMTS6 NOTCH1 PAX8 SAV1
NEGATIVE_REGULATION_OF_IMMUNE_EFFECTOR_PROCESS	0.0031746	0.0202312	0.42823	1.60567	1	95	41	SERPING1 ANXA1 GRN RNF125 FCGR2B ENPP3 TGFB1 CD300A LGALS9 LGALS3 APOA1 IRAK3 SPINK5 BST2 PTPRC PTPN6 CD84 CEACAM1 SLAMF8 BCR IL7R APOA2 VSIG4 CD47 IL13RA2 IL2RA IL33 LOXL3 SERPINB9 HMOX1 HAVCR2 ARG1 TNF ITCH CCR2 CD96 A2M PGLYRP2 DHX58 HTRA1 CD22
POSITIVE_REGULATION_OF_ENDOTHELIAL_CELL_PROLIFERATION	0.00483092	0.0267963	0.427689	1.57086	2	84	50	AKT1 ITGA4 THBS4 SP1 SEMA5A ECM1 CAV2 STAT3 CXCL12 WNT2 ACVRL1 NRP2 APLN CYBA AKT3 BMPR2 LRG1 HIF1A FLT4 F3 HMOX1 ITGB3 ARG1 HMGB2 TEK EGR3 FGF2 VASH2 PROX1 PRKD1 ADAM17 ANG KDR GATA2 AGGF1 VEGFC TGFBR1 PLCG1 PRKD2 CCL24 PDPK1 PPP1R16B NRP1 WNT5A CCL11 FGFR1 SIRT1 PLXNB3 HTR2B ARNT
NEPHRON_EPITHELIUM_DEVELOPMENT	0.0015873	0.0135741	0.427238	1.63625	0	106	53	MAGED1 GPC3 IQGAP1 PECAM1 BASP1 PKD2 SMO TACSTD2 TGFB1 ADIPOQ PBX1 OSR1 MYO1E CD34 MTSS1 WT1 WWTR1 STAT1 MYC WNT7B GLI3 AHI1 CALB1 WNT2B BCL2 IRX1 PTCH1 IRX2 SALL1 PAX2 WNT6 FMN1 TCF21 HOXA11 NPNT DCHS1 GDNF PROM1 CITED1 AGT PODXL MAGI2 GATA3 GREM1 FGF2 PTPRO AQP11 TFAP2B NOTCH1 HOXB7 FOXC1 HNF1B PAX8
POSITIVE_REGULATION_OF_EPITHELIAL_CELL_PROLIFERATION	0.00151745	0.0135741	0.426812	1.73286	0	163	94	SFRP1 LAMB1 CCND1 AKT1 IGF1 GRN ITGA4 THBS4 TGFA SMO SP1 TGFB1 SEMA5A EGFR OSR1 ATP7A TNFAIP3 FGFR2 ECM1 MYC CAV2 STAT3 CXCL12 WNT2 ACVRL1 NRP2 APLN CYBA PTN AKT3 BMPR2 C5AR1 FGF10 ESRP2 LRG1 CDH3 FOXP2 CFLAR HIF1A FLT4 F3 TGM1 HMOX1 MMP12 ITGB3 ARG1 HMGB2 PAX2 TEK DLX5 NR4A3 OSR2 FGF7 IHH SCN5A BMP5 HYAL1 EGR3 HTRA1 FGF2 KDM5B VASH2 TWIST1 CYP7B1 PROX1 PRKD1 ADAM17 LAMC1 ANG KDR NOTCH1 GATA2 AGG…
RESPONSE_TO_RETINOIC_ACID	0.00314961	0.0202312	0.426594	1.60563	1	96	35	PPARG CTSH ADNP2 TNC LYN PTK7 SERPINF1 ACER2 ABCA1 IGFBP7 OSR1 PCK1 ATM SLC6A4 FGFR2 CD38 PTK2B WNT7B CREB1 ALDH1A2 RBP4 FZD10 PTGES WNT2 FZD4 IGFBP2 EPHA3 GDAP2 PTCH1 PAX2 RET WNT6 AQP3 LRAT GJB3
POSITIVE_REGULATION_OF_SECRETION	0.00144928	0.0135741	0.426491	1.87348	0	351	173	AACS TLR8 RAB8B POSTN NADK ITGAM IGF1 FCER1G MBP CSF1R CADPS2 F2R PTAFR P2RX4 DHX9 SMPD3 IL17RC TM7SF3 EZR TLR4 OXTR GAB2 ITGB2 SOX4 TGFB1 SRI PTPN22 LGALS9 EGFR F2RL1 PYCARD SYK CASP1 CD34 P2RX7 RAB3D GNAI2 IFIH1 RETN IL1RAP ADORA2B CD14 AVPR1A DDX58 LRRK2 ABAT C1QTNF1 SLC6A4 IL17RA FGB FGA STXBP1 CD38 ADAM8 FGR GOLPH3L ORM1 MAPK3 IL17RB TRPV4 ARRB1 MYRIP SERP1 SDC1 SCAMP5 PDCD6IP C1QTNF3 TNFRSF…
REGULATION_OF_LIPID_LOCALIZATION	0.00155521	0.0135741	0.426355	1.65973	0	120	40	APOC1 APOE PPARG C3 TTC39B AKT1 P2RX4 PNPLA2 ABCA1 ADIPOQ PRELID1 THBS1 ANXA2 PLTP SYK APOA1 P2RX7 RETN SREBF2 MSR1 C1QTNF1 LIPG APOB PON1 EHD1 EDN1 IRS2 APOA2 TSPO ABCG1 NFKB1 CD36 CIDEA APOC3 ABCA12 PTCH1 HNRNPK ITGB3 PTPN11 TNF
AXON_DEVELOPMENT	0.00140845	0.0135741	0.426078	1.91525	0	473	192	NTN4 APOE FLRT2 CDH11 FAM129B EMB CTNNA1 SEMA3D SLIT3 ALCAM CAMSAP2 SEMA4A APP PTPRF ARHGDIA NTRK2 TNC GRN CHL1 UST DCLK1 PTPRA ITGA4 CSF1R SEMA3F FYN SEMA3A APOD GFRA1 NTN1 EVL EZR MATN2 ZEB2 GAB2 SMO PLXNA4 EXT1 DOCK7 SPG11 BOC SEMA5A PLXNB2 CYFIP1 DOK2 PTPRM APOA1 RAC2 PSEN1 SHOX2 PLP1 FGFR2 RELN B4GALT6 STXBP1 PLXNC1 B3GNT2 EPHB2 GRB7 CASP3 KIF5C ISLR2 SEMA3E PICALM NGFR MAPK3 PLXNB1 THY1 MAP…
POSITIVE_REGULATION_OF_I_KAPPAB_KINASE_NF_KAPPAB_SIGNALING	0.00153374	0.0135741	0.42601	1.72485	0	161	68	AKT1 PELI2 LITAF LPAR1 RIPK1 TNFRSF1A F2R FYN SHISA5 PRKCB TLR4 CD74 ADIPOQ TGM2 CARD11 LGALS9 CASP8 UBD F2RL1 CASP1 TICAM2 TLR9 BST2 CX3CL1 TLR3 MID2 GPRC5B ECM1 MIER1 EDA TIFA IRAK4 MAP3K14 FLNA S100A4 CD36 RHOA CD4 CFLAR GJA1 MAP3K3 IL1RN TAB3 HMOX1 S100B TNF TNFRSF19 MALT1 DDX21 LTF CD40 ALPK1 TRAF5 PIM2 ROR1 RELA AKAP13 TBK1 CX3CR1 TRIM25 MYD88 TNFSF10 TRAF6 TRIM62 CCL19 PRKD1 TLR6 JMJD8
OSTEOBLAST_DIFFERENTIATION	0.00157978	0.0135741	0.425895	1.76329	0	192	83	SFRP1 LOX IGFBP3 DDR2 SH3PXD2B TPM4 RASSF2 IL6ST SFRP2 AKT1 CLIC1 GDF10 GPNMB FZD1 IGF1 TNC SMOC1 TWSG1 DHX9 PENK SMO RRBP1 CEBPA VCAN SHOX2 HGF FGFR2 BMP3 WWTR1 JUNB IFITM1 FASN CAT ID2 WNT7B GLI3 CREB3L1 MEN1 DNAJC13 FBN2 TMEM119 FHL2 SUCO HAND2 BMPR2 SNRNP200 IGFBP5 ZHX3 CLEC5A PTCH1 SMAD3 MYOC TNF AREG HDAC4 TWIST2 BMP7 CEBPD DDX21 LTF IFT80 DLX5 MSX2 ITGA11 NPNT IHH IGF2 BMPR1B SKI CITED1 GD…
REGULATION_OF_ACTIN_FILAMENT_BUNDLE_ASSEMBLY	0.00318979	0.0202312	0.425667	1.57822	1	88	40	SFRP1 NOX4 SH3PXD2B MET LPAR1 EVL SWAP70 TACSTD2 APOA1 TMEFF2 CX3CL1 DLC1 S1PR1 BAG4 WAS PLEK LIMK1 ALMS1 PPM1F CD47 WASF2 FLNA GPR65 RHOA ROCK1 BRAF PPP1R9A SMAD3 MYOC ARAP1 S100A10 ARHGEF10 SERPINF2 ARHGEF5 SLC9A1 ARHGAP6 SDC4 PHLDB2 PTGER4 STMN1
NEURON_MIGRATION	0.0015674	0.0135741	0.425597	1.67598	0	131	43	AXL GAS6 FLRT2 NTRK2 CHL1 DCLK1 FYN IGSF10 SEMA3A NTN1 MATN2 GPM6A CELSR1 PLXNB2 PSEN1 CX3CL1 RELN NIPBL MYH10 FZD3 SRGAP2 STAT3 NRCAM CXCL12 NRP2 FLNA TUBB2B SH3RF1 LHX6 AUTS2 KIF20B TOP2B DAB1 ITGA3 NDNF ERBB4 NR4A2 GATA3 GFRA3 MAP1B TWIST1 CNTN2 ASPM
REGULATION_OF_VIRAL_GENOME_REPLICATION	0.011236	0.0494705	0.425391	1.53117	6	72	26	IFITM2 PABPC1 ISG20 CCL8 TOP2A IFITM3 RSAD2 ZC3HAV1 TBC1D20 RNASEL BST2 IFITM1 OAS3 CCL5 ADARB1 PPIB ADAR EIF2AK2 BCL2 FAM111A IFIT1 TNF FMR1 LTF TOP2B PLSCR1
REGULATION_OF_RESPONSE_TO_OXIDATIVE_STRESS	0.011254	0.0495204	0.425217	1.53436	6	73	34	AKT1 MCTP1 FZD1 MET RIPK1 NCOA7 FYN TLR4 HGF LRRK2 SLC7A11 FBLN5 VNN1 NONO SESN3 MMP3 CD36 HIF1A FOXO3 TNF NFE2L2 BMP7 NR4A3 SESN2 RGN PAWR SESN1 PDE8A TLR6 ACOX2 GPX1 GCH1 HDAC6 UBQLN1
POSITIVE_REGULATION_OF_MAPK_CASCADE	0.0014245	0.0135741	0.425088	1.90426	0	457	231	APOE TIMP2 IGFBP4 PTPRJ NOX4 KIT IGFBP3 PLCB1 GAS6 PDGFRA MAGED1 CD44 RASSF2 PDGFC IQGAP1 NCF1 GPNMB IGF1 CCR1 PELI2 APP CCL8 PLCE1 LPAR1 RIPK1 NTRK2 CSF1R STK39 MAP3K5 F2R GCNT2 PIK3CG KLB WWC1 SEMA3A RAP1B FCGR2B TLR4 TGFA ZEB2 ITGA1 PDE5A CD74 TGFB1 THBS1 PTPN22 LGALS9 EGFR MLKL F2RL1 PYCARD SYK PIK3R5 P2RX7 ALOX15 GNAI2 CHI3L1 TLR9 ADORA2B PSEN1 PTPRC CX3CL1 HGF HMGCR LRRK2 C1QTNF1 CSK TLR3 F…
REGULATION_OF_EPITHELIAL_CELL_MIGRATION	0.00153374	0.0135741	0.42499	1.77004	0	202	107	DCN APOE TGFBR2 ARSB PPARG RHOJ PIK3C2A MAP4K4 ANXA1 AKT1 CTSH MET SEMA4A GRN ENPP2 SPRED1 P2RX4 SERPINF1 SEMA3A DOCK5 EVL TACSTD2 SP1 TGFB1 LGMN PRCP THBS1 SEMA5A EMP2 PTPRM ANGPT2 CORO1C CEACAM1 PTK2B ITGA2 STC1 GLIPR2 CALR EDN1 RAB25 DOCK1 STARD13 PPM1F ACVRL1 NRP2 AKT3 SLIT2 BMPR2 RHOA FGF10 HIF1A FLT4 MAP3K3 EPPK1 HMOX1 ITGB3 NFE2L2 SASH1 TEK CD40 FGF7 HDAC9 ITGA3 SRC CCR6 MCC PTEN AGT HYAL1…
REGULATION_OF_EXOCYTOSIS	0.00156006	0.0135741	0.424965	1.763	0	193	94	ANXA1 RAB8B ITGAM FCER1G LYN CADPS2 APBA1 PTAFR SMPD3 RAP1B FCGR2B PRKCB GAB2 ITGB2 CPLX2 CD300A LGALS9 F2RL1 SYK RAB3D GNAI2 RAC2 ADORA2B STXBP2 LRRK2 FGB FGA STXBP1 CD84 STXBP6 NSF CEACAM1 CASK FGR SDC1 SCAMP5 PDCD6IP RAB8A FGG BCR IL13RA2 SDCBP BRAF SEPT5 PREPL HMOX1 AP1G1 FMR1 EXPH5 STX1B CCR2 RAB2B GRIK5 SEPT1 ADCY1 VPS4B RAB27B DOC2B CACNA1D CNR1 CD177 STXBP5 APBA2 HAP1 FES UNC13B SDC4 ABR …
GLIAL_CELL_DIFFERENTIATION	0.00156986	0.0135741	0.424604	1.75924	0	191	87	PPARG IL6ST AKT1 APP NDRG1 LPAR1 NTRK2 GRN LYN C1QA CD9 TLR4 PHGDH VIM SMO SOX4 TGFB1 DTX1 EGFR GSN PSEN1 PLP1 CSK RELN B4GALT6 TAL1 MAPK3 MYRF LAMC3 ID2 GLI3 FA2H BACE2 SPINT1 STAT3 TSPAN2 NAB1 ERBB3 CDKN2C CNP C5AR1 RHOA FGF10 SLC8A3 TENM4 S100B HDAC1 PTPN11 MYOC WASF3 ROR2 TNF PAX2 F2 KRAS TREM2 EGR2 ARHGEF10 DAB1 NCSTN LDLR FPR2 ROR1 PTEN RELA TTBK1 SKI WDR1 GAP43 EPHA4 TLR2 LGI4 ID4 RNF112 C…
REGULATION_OF_REGULATED_SECRETORY_PATHWAY	0.0015674	0.0135741	0.423819	1.68177	0	143	67	ITGAM FCER1G LYN APBA1 PTAFR RAP1B FCGR2B PRKCB GAB2 ITGB2 CPLX2 CD300A LGALS9 F2RL1 SYK RAB3D GNAI2 RAC2 ADORA2B STXBP2 LRRK2 STXBP1 CD84 CEACAM1 CASK FGR SCAMP5 BCR IL13RA2 BRAF SEPT5 PREPL HMOX1 AP1G1 FMR1 STX1B CCR2 GRIK5 ADCY1 DOC2B CACNA1D CNR1 CD177 APBA2 FES UNC13B ABR CACNB2 MICAL1 CSPG5 RAB27A RAB5A SYT12 ADORA2A ADRA1A CHRNA4 NOTCH1 GATA2 GIT1 SYT7 ADRA2A NLGN1 SYT15 UNC13D PDPK1 WNT7A…
MONOCARBOXYLIC_ACID_BIOSYNTHETIC_PROCESS	0.00151286	0.0135741	0.42334	1.71726	0	162	51	FADS1 APOC1 MYO5A PTGIS HSD17B12 ANXA1 ELOVL5 ABHD2 ACACA MGLL ACSM3 ASAH2 FADS2 ABCD2 ELOVL4 ACLY SLC27A2 ALDH1A3 ACSM5 CD74 ADIPOQ TBXAS1 FABP5 LTC4S HPGD ALOX15 ALOX5 AVPR1A HPGDS PLP1 ELOVL6 ADIPOR2 CEACAM1 FASN LPGAT1 STARD4 KMO ABHD3 FA2H EDN1 ERLIN2 RBP1 PTGS1 ELOVL1 FADS3 PTGES DEGS1 APOC3 SCAP ERLIN1 CYP2E1
POSITIVE_REGULATION_OF_LIPID_METABOLIC_PROCESS	0.00155521	0.0135741	0.422445	1.64699	0	121	59	APOC1 APOE POR PPARG KIT PDGFRA ANXA1 ELOVL5 AKT1 TNFRSF1A CPT1A LYN ABCD2 VAV2 SMPD3 PNPLA2 TGFB1 ADIPOQ CCDC3 APOA1 ADM AVPR1A FGR LPGAT1 FABP1 PTK2B STARD4 SORBS1 CREB1 P2RY12 IRS2 APOA2 CAPN2 ABCG1 FLT3 CD81 TNF PPARGC1A F2 TEK NR4A3 LDLR FGFR3 FPR2 SRC RGN AGT FGF2 CREBL2 TWIST1 RAB38 TNFAIP8L3 CCL19 LDLRAP1 PRKD1 CD19 SLC27A1 DGAT2 PRKAA1
POSITIVE_REGULATION_OF_STRESS_ACTIVATED_PROTEIN_KINASE_SIGNALING_CASCADE	0.0015674	0.0135741	0.42221	1.68048	0	146	62	PLCB1 RASSF2 NCF1 APP RIPK1 LYN MAP3K5 SEMA3A FCGR2B TLR4 ZEB2 MLKL F2RL1 PYCARD SYK TLR9 HMGCR TLR3 MFHAS1 MAP4K1 TRPV4 PTK2B MDFIC WNT7B EDN1 MAPK8IP1 FZD10 FZD4 EIF2AK2 DBNL HAND2 MAP3K9 SH3RF1 FLT4 SDCBP MAP3K3 IL1RN STK3 RASGRP1 ERN1 MAP3K2 ROR2 TNF VANGL2 TNFRSF19 SASH1 PTPN1 TAOK3 TRAF4 MAP3K6 SH3RF2 SERPINF2 EPHA4 CD27 ARHGEF5 FGD2 HIPK2 TRAF6 CCL19 MMP8 TLR6 AXIN1
POSITIVE_REGULATION_OF_CELL_DEVELOPMENT	0.0013986	0.0135741	0.421815	1.89874	0	479	194	MME MAN2A1 APOE TIMP2 NEGR1 ARSB PPARG KIT FAM129B IL6ST IQGAP1 RGS2 DPYSL3 FZD1 IGF1 PRKCI APP LPAR1 CAMK1D ARHGDIA NTRK2 GRN NBL1 TYROBP LYN C1QA PTPRD FYN P2RX4 PTK7 SERPINF1 SEMA3A DOCK5 NTN1 ZEB2 PDE5A SMO TCF12 TGFB1 ADIPOQ PLXNA4 PREX1 MMD SEMA5A PLXNB2 CAPRIN1 BHLHB9 CYFIP1 ENC1 APOA1 PSEN1 ADD1 CX3CL1 SHOX2 HGF PCP4 RELN FGB FGA CSF1 MYADM PLXNC1 EPHB2 GPRC5B ISLR2 NGFR PLXNB1 ITSN2 PTK2…
RESPONSE_TO_AMINO_ACID	0.00316456	0.0202312	0.421674	1.59638	1	100	39	CYBB PDGFRA PDGFC ASNS NTRK2 LYN CDO1 FYN CFL1 EGFR ATP7A PCK1 GCLC MMP2 CASP3 SESN3 CREB1 EDN1 CAPN2 BCL11A GLRB CYBA PTN SH3BP4 RHOA ICAM1 RRAGC DNMT1 PDGFD ARG1 CPS1 TNF PPARGC1A SOCS1 ZEB1 SESN2 BCL2L1 COL5A2 RELA
PEPTIDE_SECRETION	0.00140252	0.0135741	0.420999	1.89926	0	494	237	SFRP1 MYO5A GAS6 UCP2 ILDR2 MAP4K4 AACS ANXA1 TLR8 COMP RAB8B POSTN DPP4 NADK IGF1 TNFRSF1B MBP CPT1A LYN CSF1R PAM SRGN F2R SIDT2 PDIA4 DHX9 SMPD3 IL17RC FCGR2B ANXA5 TM7SF3 EZR TLR4 RSAD2 TLR5 ABCA1 CD74 SOX4 ADTRP TGFB1 SRI CARD11 PTPN22 LGALS9 PCSK5 EGFR F2RL1 PYCARD SYK RCN3 APOA1 GBP1 CASP1 CD34 P2RX7 RAB11FIP1 RAB3D CHI3L1 TLR9 IFIH1 TNFAIP3 IL1RAP CD14 LCP2 CX3CL1 DDX58 ARFGAP3 HMGCR LRRK…
ENZYME_LINKED_RECEPTOR_PROTEIN_SIGNALING_PATHWAY	0.001287	0.0135741	0.42095	1.97241	0	927	333	CYBB DCN SFRP1 AXL SULF2 IGFBP4 PTPRJ TGFBR2 LOX KIT IGFBP3 PLCB1 GAS6 XIAP PIK3C2A FLRT2 DDR2 ARPC1B PDGFRA MYOF SGPL1 FAM129B MERTK SIK2 CD109 SORT1 RASSF2 SH2B2 IL6ST SFRP2 COMP GPC3 PDGFC SFRP5 AKT1 IQGAP1 NCF1 GDF10 REPS2 NCKAP1 RARRES2 CHRDL1 NCKAP1L FZD1 EPS8 NEDD4 IGF1 GREM2 CHST11 PLAT MET APP CAV1 ADAMTS12 PLCE1 PTPRF NTRK2 NBL1 LYN PTPRA EFEMP1 PTBP1 CSF1R MYO1C PTPRD VAV2 ARF4 TWSG1 G…
POSITIVE_REGULATION_OF_CELL_MORPHOGENESIS_INVOLVED_IN_DIFFERENTIATION	0.0015625	0.0135741	0.42054	1.66674	0	141	64	ARHGDIA NTRK2 PTPRD DOCK5 NTN1 ZEB2 PLXNA4 PREX1 SEMA5A PLXNB2 CAPRIN1 BHLHB9 CYFIP1 APOA1 SHOX2 RELN FGB FGA MYADM PLXNC1 ISLR2 NGFR PLXNB1 MAP6 ROBO1 FN1 FGG CALR DBN1 DOCK1 PLXNA2 LPAR3 LIMK1 PAK3 CXCL12 FLNA TUBB2B SLIT2 BMPR2 RHOA EFNA5 BRAF PLXNA1 SKIL MYOC FBXW8 S100A10 CRABP2 NEDD9 RAC3 NIN EPHA4 CUL7 TRPV2 MAP1B ITPKA LRP8 SEMA7A ACTR2 SS18L1 LRP1 CAPRIN2 L1CAM RUFY3
RESPONSE_TO_LIPID	0.00132275	0.0135741	0.420452	1.95456	0	802	317	CYBB DCN SFRP1 AXL CXCL9 CD68 TGFBR2 LOX PPARG MRC1 UCP2 MSN ARPC1B CCND1 CSF2RB AACS ANXA1 NRIP1 ADCY3 ABHD2 SLIT3 POSTN AKT1 GNG2 CTSH ADNP2 CLDN1 NEDD4 BCHE ACACA ESR1 CCR5 LITAF CAV1 TNFRSF1B LPAR1 TNC CPT1A GNB1 LYN ADCYAP1R1 PAM F2R DAB2 CDO1 PTAFR PTK7 SERPINF1 ACER2 SELP TLR4 CD180 LY86 PENK OXTR VIM RNF4 ABCA1 PLCG2 PID1 SMO NCOA4 ADTRP GNG12 ADAM15 TGFB1 ADIPOQ XRN1 IGFBP7 SIRPA ACP5 TH…
MESONEPHROS_DEVELOPMENT	0.00316456	0.0202312	0.420358	1.59139	1	100	42	SFRP1 MAGED1 EPCAM GPC3 BASP1 PKD2 SMO TACSTD2 TGFB1 PBX1 OSR1 WT1 FGFR2 SDC1 CAT MYC GLI3 CALB1 WNT2B BCL2 SLIT2 FGF10 PTCH1 SMAD3 SALL1 PAX2 BMP7 RET WNT6 FMN1 TCF21 OSR2 HOXA11 NPNT DCHS1 GDNF CITED1 AGT GATA3 GREM1 FGF2 ARG2
CEREBRAL_CORTEX_DEVELOPMENT	0.00316957	0.0202312	0.420262	1.60393	1	104	34	PLCB1 LAMB1 NTRK2 TACC1 SEMA3A SMO GNG12 EGFR PSEN1 RELN MDK GLI3 ROBO1 P2RY12 EMX2 SRGAP2 DIXDC1 NRP2 FLNA LRP6 SLIT2 BBS2 RHOA FOXP2 PAX5 HIF1A CDON LHX6 EOMES MBOAT7 SLC2A1 DAB1 MCPH1 CEP120
REGULATION_OF_OSTEOBLAST_DIFFERENTIATION	0.0031746	0.0202312	0.419705	1.6074	1	106	45	SFRP1 DDR2 RASSF2 IL6ST SFRP2 CLIC1 GDF10 IGF1 SMOC1 TWSG1 CEBPA HGF FGFR2 IFITM1 ID2 WNT7B GLI3 MEN1 FBN2 TMEM119 SUCO HAND2 BMPR2 IGFBP5 ZHX3 PTCH1 SMAD3 TNF AREG HDAC4 TWIST2 BMP7 CEBPD LTF MSX2 NPNT BMPR1B SKI CITED1 GDPD2 GREM1 ID4 HEMGN TWIST1 SUFU
REGULATION_OF_CELL_MORPHOGENESIS	0.00141844	0.0135741	0.41945	1.87662	0	444	181	APOE ACTN4 FBLN1 KIT RHOJ MSN PARVA CD44 ANXA1 SEMA3D POSTN EPS8 NEDD4 SEMA4A SYNE3 LPAR1 ARHGDIA NTRK2 UST SH3D19 CSF1R SEMA3F PTPRD ENPP2 FYN SEMA3A DOCK5 ADAM10 CFL1 NTN1 EZR ZEB2 ATP10A ITGB2 TACSTD2 SDC2 PLXNA4 PREX1 GNA13 PRPF40A FBLIM1 HCK CORO1B GNA12 SEMA5A PLXNB2 CAPRIN1 BHLHB9 CYFIP1 APOA1 GBP1 MOV10 CORO1C PSEN1 SHOX2 LRRK2 DLC1 SHROOM3 RELN PDPN FGB FGA MYADM PLXNC1 EPHB2 HEXB ISLR2 …
RESPONSE_TO_ACID_CHEMICAL	0.00147493	0.0135741	0.419414	1.81561	0	301	117	CYBB SFRP1 PPARG UCP2 PDGFRA AACS PDGFC AKT1 GNG2 CTSH ADNP2 CLDN1 BCHE ACACA ASNS NTRK2 TNC CPT1A GNB1 LYN CD9 CDO1 FYN PTAFR PTK7 SERPINF1 ACER2 FOLR2 CFL1 PKD2 ABCA1 PID1 ADIPOQ IGFBP7 ACSL1 PTGFR EGFR GSN OSR1 ATP7A PCK1 ATP2B4 ATM AVPR1A SLC6A4 FGFR2 GCLC MMP2 COL18A1 EGR1 CD38 APOB CASP3 PTK2B KCNMB1 PON1 CAT ITGA2 SESN3 WNT7B CREB1 ALDH1A2 RBP4 EDN1 PTGER2 TYMS UCP1 FZD10 CAPN2 PTGES WNT2 …
CELLULAR_RESPONSE_TO_LIPID	0.00141443	0.0135741	0.419358	1.8981	0	526	204	SFRP1 AXL CXCL9 CD68 PPARG MRC1 MSN AACS ANXA1 NRIP1 ADCY3 ABHD2 AKT1 GNG2 ADNP2 CLDN1 NEDD4 ACACA ESR1 CCR5 LITAF TNFRSF1B LPAR1 TNC CPT1A GNB1 LYN DAB2 PTAFR PTK7 SERPINF1 TLR4 CD180 LY86 PENK VIM RNF4 ABCA1 PID1 SMO NCOA4 ADTRP ADAM15 TGFB1 SIRPA ATP1A3 PTPN22 HCK PTGFR EGFR OSR1 PYCARD PCK1 CASP1 TICAM2 VDR ZFP36L2 TNFAIP3 RB1 CD14 LCN2 CX3CL1 AHR ATM TFPI SLC6A4 CCNA2 LBP FGFR2 PGR PDCD4 IRA…
CELLULAR_RESPONSE_TO_NITROGEN_COMPOUND	0.00138504	0.0135741	0.419292	1.9075	0	569	199	CYBB SFRP1 POR MYO5A NOX4 PPARG PLCB1 PIK3C2A UCP2 PDGFRA SIK2 SH2B2 CTNNA1 RAB8B ADCY3 PDGFC AKT1 COLEC12 GNG2 RARRES2 IGF1 PRKCI APP CAV1 NTRK2 HSP90B1 GNB1 LYN PTPRA ITGA4 MYO1C RAB31 PDE3B MAP3K5 FYN PTAFR P2RX4 PIK3CG DHX9 SMPD3 RAP1B AHSG FOLR2 PRLR FCGR2B ANXA5 CDH1 PRKCB EZR PKD2 TLR4 CCND3 PENK PRKAR2B VIM TSHR PID1 SP1 TGFB1 ADIPOQ XRN1 LGMN DPEP1 ATP1A3 PTPN22 EGFR VCAM1 LPIN2 ATP7A CY…
REGULATION_OF_CELLULAR_RESPONSE_TO_GROWTH_FACTOR_STIMULUS	0.0015083	0.0135741	0.41883	1.77388	0	248	92	DCN SFRP1 SULF2 TGFBR2 LOX XIAP MYOF FAM129B CD109 SFRP2 GPC3 SFRP5 CHRDL1 FZD1 NEDD4 GREM2 CHST11 CAV1 ADAMTS12 NBL1 MYO1C TWSG1 SULF1 DAB2 ITGA8 PCSK6 TNMD PRKCB TGFB1 THBS1 CCBE1 CYFIP1 ADAMTS3 GLG1 FGFR2 SFRP4 CTDSPL2 RBPMS2 CASK TGFB1I1 RBPJ ROBO1 CREB3L1 MEN1 CAV2 FBN2 SMURF2 BAMBI ACVRL1 FERMT1 FZD4 APLN GDF5 PRDM16 SLIT2 BMPR2 VWC2 FGF10 LRG1 CIDEA CDKN1C CFLAR ASPN HIF1A SDCBP LTBP1 CADM…
ACTIN_POLYMERIZATION_OR_DEPOLYMERIZATION	0.00155521	0.0135741	0.418826	1.71887	0	179	80	LIMA1 ARPC1B TMOD2 DSTN NCKAP1 NCKAP1L EPS8 IQGAP2 MYO1C TMOD3 WIPF1 CAP1 CFL1 EVL SWAP70 PREX1 HCK CORO1B SEMA5A GSN ADD3 F2RL1 PYCARD CYFIP1 HCLS1 VILL ARPC5 CAPZA1 ALOX15 ADD1 MYADM BAG4 FAM107A GMFB PTK2B MICALL2 CDC42EP4 TWF1 WAS ACTR3 PLEK PAK3 JAK2 SPTBN1 CXCL12 SPTAN1 SPIRE1 SLIT2 ABI1 GMFG RHOA ICAM1 PPP1R9A WASF3 CTTN CAPG BAIAP2 FMN1 PLEKHH2 MTPN PSTPIP1 SPTBN2 CORO1A ABI2 TMSB10 RAC3 …
BLOOD_VESSEL_ENDOTHELIAL_CELL_MIGRATION	0.00313972	0.0202312	0.418552	1.6106	1	110	56	APOE PPARG RHOJ PIK3C2A ANXA1 AKT1 SPRED1 P2RX4 ADTRP SP1 TGFB1 PRCP THBS1 EMP2 APOA1 ANGPT2 PTK2B ROBO1 STARD13 ACVRL1 AKT3 SLIT2 RHOA HIF1A MAP3K3 HMOX1 NFE2L2 CD40 HDAC9 MYH9 ITGB1 EGR3 GREM1 FGF2 HRG KLF4 ANGPT4 NOS3 CLEC14A PRKD1 ADAM17 GPX1 KDR FOXC2 NOTCH1 GATA2 VEGFC SH3BP1 PLCG1 PRKD2 MMRN2 PDPK1 NRP1 FGFR1 ETS1 SIRT1
CELLULAR_RESPONSE_TO_INORGANIC_SUBSTANCE	0.00154799	0.0135741	0.418531	1.73567	0	186	58	CLIC4 CYBB B2M AKT1 IQGAP1 NCF1 KCNK3 CLDN1 APP SLC25A24 P2RX4 SERPINF1 SMPD3 CPNE8 ANXA5 CDH1 PKD2 LGMN DPEP1 ALOX5AP EGFR GSN EIF2AK3 ATP7A ALOX15 CEBPA ADD1 CHP2 MEF2A LRRK2 CCNA2 ADCY7 JUNB MAPK3 CPNE3 ID2 CREB1 CALR EDN1 MMP3 HVCN1 TSPO ATRX CFLAR BRAF KCNA1 HMOX1 TRPM2 PPARGC1A FMR1 NFE2L2 CCNB1 FOSB ADCY1 FABP4 SLC25A23 NCSTN FBP1
REGULATION_OF_PEPTIDE_SECRETION	0.00145349	0.0135741	0.418321	1.85161	0	400	190	SFRP1 GAS6 UCP2 MAP4K4 AACS ANXA1 TLR8 RAB8B POSTN DPP4 NADK IGF1 TNFRSF1B MBP CPT1A LYN CSF1R PAM SRGN F2R SIDT2 DHX9 IL17RC FCGR2B ANXA5 TM7SF3 EZR TLR4 RSAD2 TLR5 CD74 SOX4 ADTRP TGFB1 SRI PTPN22 LGALS9 EGFR F2RL1 PYCARD SYK APOA1 GBP1 CASP1 CD34 P2RX7 RAB11FIP1 TLR9 IFIH1 TNFAIP3 IL1RAP CD14 CX3CL1 DDX58 HMGCR LRRK2 ABAT IL17RA FGB FGA PFKL CD38 ADAM8 FGR GOLPH3L ORM1 MAPK3 IL17RB TRPV4 ARRB1…
ORGANIC_HYDROXY_COMPOUND_METABOLIC_PROCESS	0.00142857	0.0135741	0.418259	1.86059	0	413	187	APOC1 APOE POR LIMA1 MYO5A KIT PLCB1 MYOF LEPR TTC39B CYP1B1 HDC ASAH1 LIPA SRD5A3 ITGAM ACACA ASAH2 APP LIPE PLCE1 PSAT1 ADCYAP1R1 SOAT1 SPTLC2 NPC2 DIO2 ACLY DHCR24 SLC27A2 PTAFR ACER2 DGAT1 PLD4 ZEB2 ALDH1A3 ABCA1 ITGB2 PLCG2 HMGCS2 SP1 LGMN INPP5D APOBR MOXD1 ALDH3B2 CYB5R3 PLTP ATP7A APOA1 PCK1 GC SQLE VDR ALOX15 CEBPA SREBF2 TTR HMGCR ABAT ELOVL6 SLC7A11 DHRS9 APOB ADH7 EPHX1 PLCB3 FASN DUO…
CARBOHYDRATE_DERIVATIVE_CATABOLIC_PROCESS	0.00152672	0.0135741	0.417363	1.68901	0	160	53	DCN LYVE1 ARSB GNS OGN PDE1A KERA GM2A BGN CD44 GPC6 GPC3 OMD DPYD ADAMTS12 NT5E FMOD IDS HPSE LUM PDE5A TGFB1 SDC2 EDEM1 VCAN NAGA UPP1 SDC3 SAMHD1 GLB1 APOBEC1 HEXB PNP SDC1 GALC AOAH CHP1 STAB2 SGSH HGSNAT STT3B OVGP1 UPB1 ADA GALNS MMP12 PRELP HMMR EDEM2 MANBA NEIL2 GUSB CTBS
JNK_CASCADE	0.00157233	0.0135741	0.417271	1.72734	0	190	84	SFRP1 PLCB1 MAP4K4 RASSF2 SFRP2 MAGI3 AKT1 NCF1 APP RIPK1 MAP3K5 SEMA3A FCGR2B TLR4 ZEB2 SIRPA PTPN22 EGFR MLKL DACT1 F2RL1 PYCARD SYK TLR9 ADORA2B TLR3 MFHAS1 PDCD4 IRAK2 MAP4K1 TRPV4 PTK2B MDFIC WNT7B MEN1 EDN1 IRAK4 MAPK8IP1 FZD10 AMBP MAP4K3 FZD4 DBNL MAP3K9 SH3RF1 FLT4 SDCBP IL1RN STK3 TAB3 RASGRP1 ERN1 MAP3K2 ROR2 TNF VANGL2 ITCH TNFRSF19 SASH1 CASR PTPN1 RAP2A MECOM TAOK3 TRAF4 AIDA MAP3K6…
MULTICELLULAR_ORGANISMAL_HOMEOSTASIS	0.00142653	0.0135741	0.41705	1.85348	0	406	181	NOX4 ALB UCP2 LEPR ILDR2 B2M ADCY3 BSCL2 PDGFC CTSH LIPA CLDN1 ACACA MET CXADR PLAC8 CAV1 IRF4 CSF1R STK39 F2R DIO2 GCNT2 PIGR LAMA4 P2RX4 PRLR NAPSA TLR4 OXTR PRKAR2B TSHR MYO5B SMO PTGER3 ADIPOQ DOCK7 PRCP ACP5 INPP5D ACSL1 EGFR SASH3 SLC11A1 SYK FABP5 RCN3 CD34 P2RX7 RAB3D SNX10 TLR9 RAC2 TNFAIP3 RB1 ADD1 LCN2 CLDN4 MUC4 LRRK1 ABAT CSK ELOVL6 SCNN1A S1PR1 LNPEP ADIPOR2 ADCY7 CSF1 WWTR1 EGR1 CD…
REGULATION_OF_STRESS_ACTIVATED_PROTEIN_KINASE_SIGNALING_CASCADE	0.00152672	0.0135741	0.416915	1.73933	0	204	81	SFRP1 PLCB1 MAP4K4 RASSF2 SFRP2 MAGI3 AKT1 NCF1 APP RIPK1 LYN MAP3K5 SEMA3A FCGR2B EZR TLR4 ZEB2 SIRPA PTPN22 EGFR MLKL DACT1 F2RL1 PYCARD SYK TLR9 HGF HMGCR TLR3 MFHAS1 PDCD4 MAP4K1 MAPK3 TRPV4 PTK2B MYC MDFIC WNT7B MEN1 EDN1 ZMPSTE24 MAPK8IP1 FZD10 AMBP FZD4 EIF2AK2 DBNL HAND2 MAP3K9 SH3RF1 FLT4 SDCBP MAP3K3 PBK IL1RN STK3 RASGRP1 ERN1 MAP3K2 ROR2 TNF VANGL2 ITCH TNFRSF19 SASH1 PTPN1 RAP2A MECO…
COGNITION	0.00151286	0.0135741	0.416621	1.76518	0	249	80	MME APOE KIT PLCB1 TMOD2 GM2A ADCY3 BCHE APP NTRK2 CHL1 ARF4 FYN ITGA8 SERPINF1 TUSC3 OXTR PRKAR2B LGMN KCNK2 EGFR MEIS2 BHLHB9 PPT1 CYFIP1 STRA6 PSEN1 UBA6 HMGCR SLC6A4 RELN TIFAB SLC7A11 LRRN4 MGAT3 EPHB2 CASP3 PICALM MDK FAM107A GMFB GATM NIPBL ATXN1L CREB1 SHANK2 SLC1A4 CALB1 RGS14 PTN C5AR1 FOXP2 JAKMIP1 HIF1A TANC1 BRAF SLC8A3 S100B TNF ST3GAL4 HRH2 KRAS EGR2 ADCY1 NCSTN LDLR SYNJ1 AFF2 CNR…
PROTEIN_AUTOPHOSPHORYLATION	0.0015361	0.0135741	0.416619	1.74935	0	224	82	KIT DDR2 PDGFRA SIK2 RASSF2 PDGFC AKT1 IQGAP1 GPNMB UHMK1 PRKX CAV1 RIPK1 NTRK2 ACE LYN CSF1R STK39 FYN RAD50 SLA ADIPOQ HCK EGFR EIF2AK3 SYK RAP2B PPP2R5A IRAK3 PTPRC ATM ENPP1 LRRK2 CSK FGFR2 STK10 PAK2 DAPK1 MAP4K1 BTK FGR MAPK3 PTK2B THY1 CAMKK2 TRPM7 FRK CHP1 BCR STK17B JAK2 EIF2AK2 STK4 BLK MAP3K9 FLT3 ERRFI1 FLT4 MAP3K3 ERN1 LCK PDGFD GRK5 RIPK3 TYRO3 STK24 SIK1 TEK RAP2A MEX3B TAOK3 TAF1 …
REGULATION_OF_REPRODUCTIVE_PROCESS	0.00155039	0.0135741	0.416582	1.6352	0	124	51	SFRP1 PLCB1 IGF1 ESR1 SULF1 PTAFR SERPINF1 SEMA3A ANXA5 OXTR PDE5A ARHGDIB LHFPL2 RETN WT1 HPGDS FGFR2 ACVR1C CALR INHBB EDNRB SMURF2 STK4 LFNG OVGP1 STK3 PDE3A ADA ZFPM2 HDAC4 BMP7 MSX2 CNR1 SRC CCR6 RGN TACR1 CDC20 ASPM TRIP13 NUPR1 TIMP1 NOTCH1 MSX1 SNAI1 INHBA SYDE1 NRK CDC25B PRDX4 WNT5A
REGULATION_OF_ACTIN_FILAMENT_BASED_PROCESS	0.001443	0.0135741	0.416301	1.82458	0	345	152	SFRP1 DSP LIMA1 NOX4 RHOJ GPM6B ARPC1B PDGFRA TMOD2 SH3PXD2B DSTN NCKAP1 NCKAP1L EPS8 IQGAP2 MET CAV1 LPAR1 ARHGDIA CSF1R PAM MYO1C TMOD3 WIPF1 CFL1 EVL SWAP70 TACSTD2 TGFB1 SRI PREX1 HCK CORO1B BST1 SEMA5A GSN ADD3 CELSR1 ARHGDIB DSG2 F2RL1 PYCARD CYFIP1 HCLS1 VILL APOA1 TMEFF2 ARPC5 CAPZA1 ALOX15 ADD1 BST2 CX3CL1 CNN2 DLC1 S1PR1 PDPN HCN4 MYADM BAG4 SEMA3E FAM107A GMFB PTK2B STAP1 ARHGEF19 STC1…
APPENDAGE_MORPHOGENESIS	0.0015625	0.0135741	0.416064	1.6428	0	136	59	SFRP2 GPC3 RECK CHST11 SOX4 PBX1 PCSK5 GNA12 OSR1 PSEN1 SHOX2 FGFR2 NIPBL GLI3 ALDH1A2 PLXNA2 FBN2 ATRX AFF3 GDF5 LRP6 HAND2 FGF10 GRHL2 FZD6 FRAS1 PTCH1 SEMA3C HDAC1 SALL1 ROR2 ECE1 BCL2L11 BMP7 FMN1 DLX5 MSX2 GJA5 CRABP2 OSR2 WDR19 HOXA11 FREM2 IHH BMPR1B SKI TFAP2A GREM1 IFT122 MYH3 TWIST1 RNF165 RPGRIP1L GLI2 TMEM231 TFAP2B NOTCH1 MSX1 CACNA1C
CAMERA_TYPE_EYE_DEVELOPMENT	0.00150376	0.0135741	0.415757	1.78153	0	275	112	CLIC4 MAN2A1 TGFBR2 RHOJ PDGFRA KERA MERTK CYP1B1 NTRK2 GNB1 EFEMP1 TWSG1 SERPINF1 ZEB2 VIM ALDH1A3 TGFB1 TBC1D20 EGFR GPM6A PTPRM ATP2B4 FAT1 STRA6 XRN2 PSEN1 WT1 SLC7A11 BCAR3 EPHB2 COL8A2 SHROOM2 THY1 RAB11FIP4 LAMC3 WNT7B GLI3 ALDH1A2 AHI1 MYH10 RBP4 FBN2 CALB1 WNT2B WNT2 ACVRL1 FZD4 BCL11B HIPK1 LRP6 PTN BMPR2 FGF10 CDKN1C FOXP2 GRHL2 HIF1A BFSP1 HDAC1 SMAD3 SKIL CDON PAX2 IRX5 BMP7 RET NINJ…
RAS_PROTEIN_SIGNAL_TRANSDUCTION	0.00143678	0.0135741	0.415392	1.84133	0	397	180	APOE TIMP2 RHOJ MAP4K4 HEG1 SH2B2 RASA3 RAB8B NCKAP1 EPS8 IGF1 MET PLCE1 LPAR1 ARHGDIA PECAM1 GNB1 LYN RAB31 VAV2 F2R CYTH3 PLEKHG1 RAP1B RAB34 CFL1 NTN1 ARHGEF3 RAB32 RAB43 ABCA1 PREX1 GNA13 ARHGEF28 GNA12 RALGPS2 CYTH4 CELSR1 ARHGAP29 ARHGDIB F2RL1 CYFIP1 DOK2 APOA1 RAP2B RAB3D ARHGAP1 NET1 GPSM2 RAC2 RB1 CBL DLC1 CCNA2 RAPGEF6 PDPN RALGDS CSF1 EPHB2 NGFR FGD3 ARRB1 ITSN2 ARHGEF37 RAB8A ARHGEF1…
NEGATIVE_REGULATION_OF_PEPTIDASE_ACTIVITY	0.00155039	0.0135741	0.415169	1.72133	0	187	86	POR TIMP2 C3 GAS6 PROS1 XIAP ANXA8 SERPING1 CD109 CD44 SFRP2 GPC3 AKT1 ITIH2 ARL6IP1 RECK APP TNFAIP8 DHCR24 SERPINF1 AHSG APLP2 C4B TIMP3 DPEP1 THBS1 ITIH5 SERPINB5 RPS6KA3 PI15 SPINK5 BST2 HGF TFPI PAK2 PZP ECM1 PICALM NGFR ARRB1 FABP1 KNG1 SPINT1 AMBP SERPINC1 SPINT2 RPS6KA1 WFDC2 ITIH3 CFLAR SH3RF1 ITIH4 SERPINB9 SERPINB10 PAX2 LTF CST7 PLAUR COL28A1 A2M CSTB SRC SERPINB7 SERPINF2 AGT SERPINB…
POSITIVE_REGULATION_OF_NERVOUS_SYSTEM_DEVELOPMENT	0.00140056	0.0135741	0.414838	1.86743	0	470	186	MME MAN2A1 APOE TIMP2 NEGR1 ARSB PPARG KIT FLRT2 IL6ST IQGAP1 RGS2 DPYSL3 FZD1 PRKCI SEMA4A APP LPAR1 CAMK1D ARHGDIA NTRK2 GRN NBL1 LYN C1QA PTPRD FYN THBS2 P2RX4 PTK7 SERPINF1 SEMA3A NTN1 OXTR ZEB2 SMO TCF12 TGFB1 PLXNA4 MMD SEMA5A PLXNB2 CAPRIN1 BHLHB9 CYFIP1 ENC1 CLSTN1 IL1RAP PSEN1 CX3CL1 SHOX2 HGF PCP4 RELN CSF1 AMIGO2 PLXNC1 EPHB2 GPRC5B ISLR2 NGFR PLXNB1 ITSN2 PTK2B MYRF NIPBL MAP6 CLSTN3 …
ORGANIC_ACID_BIOSYNTHETIC_PROCESS	0.00150376	0.0135741	0.414813	1.76308	0	255	83	FADS1 APOC1 MYO5A PTGIS HSD17B12 ANXA1 ELOVL5 ABHD2 SLC1A3 NAT8L ACACA MGLL CBS ACSM3 ASAH2 ASNS DPYD FADS2 ALDH18A1 PLA2G4A PSAT1 ABCD2 ELOVL4 ACLY CDO1 SLC27A2 PHGDH ALDH1A3 ACSM5 CD74 ADIPOQ TBXAS1 ALOX5AP ASPG SERINC3 BCAT1 BHMT SYK FABP5 ATP2B4 LTC4S HPGD ALOX15 ALOX5 SERINC5 AVPR1A HPGDS PLP1 ABAT ELOVL6 NAALAD2 DHRS9 ADIPOR2 CEACAM1 FASN LPGAT1 STARD4 ALDH1A2 KMO GLUD1 ABHD3 FA2H EDN1 ERLI…
ACTIN_FILAMENT_ORGANIZATION	0.00144718	0.0135741	0.414662	1.82141	0	353	152	CGNL1 SFRP1 ACTN4 LIMA1 NOX4 RHOJ PLS3 ARPC1B TMOD2 SH3PXD2B TPM4 ACTN1 CTNNA1 DSTN DPYSL3 NCKAP1 NCKAP1L EPS8 PRKCI IQGAP2 MET LPAR1 HSP90B1 MYO1C TMOD3 WIPF1 CAP1 CFL1 EVL EZR ZYX SWAP70 TACSTD2 PREX1 HCK CORO1B LCP1 SEMA5A GSN ADD3 POF1B EMP2 F2RL1 PYCARD CYFIP1 HCLS1 VILL APOA1 TMEFF2 ARPC5 FAT1 CAPZA1 ALOX15 RAC2 ADD1 CX3CL1 DLC1 SHROOM3 S1PR1 ARHGAP25 MYADM BAG4 TRPV4 ARRB1 FAM107A SHROOM2 …
POSITIVE_REGULATION_OF_ACTIN_FILAMENT_POLYMERIZATION	0.00473186	0.0263463	0.413652	1.53657	2	87	37	ARPC1B NCKAP1 NCKAP1L IQGAP2 MYO1C WIPF1 EVL HCK CORO1B GSN PYCARD CYFIP1 ARPC5 ALOX15 BAG4 GMFB PTK2B CDC42EP4 WAS ACTR3 SPIRE1 GMFG RHOA ICAM1 CTTN BAIAP2 FMN1 CORO1A ABI2 RAC3 SNX9 BAIAP2L1 ARF6 CDC42EP5 FCHSD2 ACTR2 FCHSD1
TUBE_FORMATION	0.0015625	0.0135741	0.413333	1.63818	0	141	64	SFRP1 SFRP2 FZD1 LUZP1 ST14 PTK7 CFL1 ZEB2 SOX4 TGFB1 TGM2 CELSR1 PLXNB2 OSR1 ADM DLC1 SHROOM3 FGFR2 EDA FZD3 SPINT1 MTHFD1L SPINT2 APAF1 LRP6 STK4 FGF10 IRX1 GRHL2 FZD6 HIF1A PTCH1 STK3 GDF7 IRX2 PAX2 VANGL2 BCL2L11 BMP7 RET KIF20B WNT6 SETD2 LRP2 KDM2B GDNF BMP5 SKI PODXL GATA3 GREM1 FZD2 IFT122 TWIST1 SUFU TRAF6 SDC4 PRICKLE1 PROX1 GRHL3 CEP290 NOTCH1 HNF1B PAX8
CELLULAR_RESPONSE_TO_PEPTIDE_HORMONE_STIMULUS	0.0014881	0.0135741	0.412537	1.77644	0	284	113	POR MYO5A PPARG PIK3C2A UCP2 SIK2 SH2B2 RAB8B ADCY3 AKT1 RARRES2 PRKCI CAV1 LYN PTPRA MYO1C RAB31 PDE3B FYN RAP1B AHSG PRLR ANXA5 PRKCB CCND3 PRKAR2B TSHR PID1 SP1 TGFB1 ADIPOQ LPIN2 CYFIP1 PCK1 PTPRE ATP6V1A GNAI2 ENPP1 CSK CCNA2 GCLC ADCY7 APOBEC1 CEACAM1 EIF4EBP1 STAT1 RAB8A SORBS1 SESN3 ZFP36L1 LEPROT CREB1 MEN1 CAV2 EDN1 IRS2 INHBB ATP6V0D2 DENND4C SHC1 JAK2 STAT3 AP3S1 NFKB1 CYBA CFLAR SOCS…
INORGANIC_ANION_TRANSMEMBRANE_TRANSPORT	0.00314961	0.0202312	0.412349	1.55201	1	96	24	CLIC4 GABRA3 SLC25A10 SLC1A3 CLIC1 CLCA2 PTAFR CLCN5 SLC13A4 CLDN4 SLC37A2 SLC25A30 TTYH3 CLIC6 ANO6 CLCA1 ANO1 SLC1A4 FXYD3 GLRB SLC26A2 ADAMTS8 SLC12A7 CASR
NEGATIVE_REGULATION_OF_MULTICELLULAR_ORGANISMAL_PROCESS	0.00125471	0.0135741	0.412032	1.94303	0	1050	438	APOC1 DCN SFRP1 AXL APOE TGFBR2 PPARG GAS6 PROS1 SERPING1 PDGFRA DENND5A MAP4K4 FAM129B MERTK B2M ANXA1 TLR8 SFRP2 CTNNA1 SEMA3D TMEM176B SFRP5 RGS2 PTPN9 DPYSL3 GDF10 GPNMB NCKAP1L IGF1 CCR1 PLAT SEMA4A APP CXADR PLAC8 ADAMTS12 TNFRSF1B ASAP1 LPAR1 ARHGDIA RIPK1 TNFRSF1A GRN TYROBP LYN EFEMP1 RNF125 C1QC ABCD2 SRGN STK39 SEMA3F PDE3B CD9 F2R TWSG1 THBS4 SULF1 THBS2 LAMA4 SPRED1 P2RX4 PIK3CG SERP…
NEGATIVE_REGULATION_OF_DEVELOPMENTAL_GROWTH	0.00316456	0.0202312	0.411741	1.55877	1	100	31	SFRP1 TGFBR2 SFRP2 SEMA3D RGS2 SEMA4A CXADR PLAC8 RIPK1 SEMA3F WWC1 SEMA3A NTN1 LGMN KCNK2 SEMA5A SLC6A4 SEMA3E WWC2 SEMA3G RBP4 SEMA4B MAPK11 BCL11A STK4 BBS2 PTCH1 SEMA3C STK3 NKD1 ARHGAP4
DENDRITE_DEVELOPMENT	0.00155039	0.0135741	0.411574	1.71034	0	201	71	APOE IQGAP1 CAMSAP2 NEDD4 APP ASAP1 LPAR1 CAMK1D DCLK1 PTPRD ARF4 FYN SEMA3A ADAM10 CFL1 MATN2 SDC2 PREX1 DOCK10 CAPRIN1 BHLHB9 CYFIP1 STRN PSEN1 MEF2A UBA6 LRRK2 RELN PAK2 EPHB2 PICALM MAP6 SHANK2 DBN1 PREX2 PAK3 SRGAP2 BCL11A SIPA1L1 ABI1 RHOA FARP1 PPP1R9A LST1 ZMYND8 NGEF DLG5 FMR1 HECW2 BMP7 FBXW8 RAP2A CD3E DAB1 ABI2 PAK4 IGSF9 PTEN BMP5 MAPK6 PACSIN1 ITGB1 CTNND2 ARF6 EPHA4 CUL7 ACSL4 CDC2…
DEVELOPMENTAL_MATURATION	0.00154083	0.0135741	0.411483	1.73282	0	238	84	NTN4 AXL PTBP3 MYO5A PPARG C3 ABHD2 IGF1 RECK APP C1QA RAB32 CEBPA CLSTN1 RB1 SPINK5 CX3CL1 LRRK2 RELN S1PR1 PGR MMP2 B4GALT6 L3MBTL3 STXBP1 ARCN1 BTK TAL1 PICALM PLXNB1 RBPJ PTK2B SEZ6L ID2 ALDH1A2 FGG ANO6 EDNRB TYMS NRCAM ACVRL1 FERMT1 BCL11A THBS3 BCL2 RHOA CDH3 CDKN1C HIF1A BFSP1 PDE3A FOXO3 AP1G1 MYOC LHX6 PAX2 CCNB1 IRX5 RET LTF MSX2 FGFR3 DCHS1 NR4A2 CCR6 RAC3 IHH PTEN FAM210B NRXN1 GATA3…
REGULATION_OF_REACTIVE_OXYGEN_SPECIES_METABOLIC_PROCESS	0.00476948	0.0265155	0.411443	1.53119	2	91	41	TGFBR2 NOX4 CYP1B1 ITGAM RIPK1 TYROBP GNAI3 ARF4 ITGB2 PID1 TGFB1 PRCP ACP5 THBS1 BST1 EGFR F2RL1 SYK GNAI2 RAC2 FBLN5 MMP3 BCR TSPO CYBA BCL2 CD36 PDK3 HIF1A RIPK3 TNF NFE2L2 PAX2 F2 BMP7 BRCA1 CD177 FPR2 RGN AGT TFAP2A
ORGANIC_ACID_TRANSPORT	0.00150376	0.0135741	0.411372	1.7703	0	291	85	APOE PPARG SLC25A10 EMB ANXA1 SLC16A7 SLCO2A1 SLC1A3 AKT1 RGS2 ARL6IP1 ATP8B1 ACACA LRRC8D SLC25A1 NTRK2 SLC36A4 ACE CPT1A PLA2G4A STARD5 STK39 SLC38A1 APBA1 SLC27A2 P2RX4 PLA2G2D SLC43A2 FOLR2 SFXN1 SLC36A2 PROCA1 THBS1 ACSL1 SLC7A1 SLC11A1 SLC16A2 OSR1 SYK P2RX7 STRA6 PSEN1 SLC13A4 AVPR1A ABAT SLC25A32 LRRC8C MFSD2A SLC7A11 SLC7A10 PDPN SLC3A2 STXBP1 CEACAM1 SLC7A5 SLC25A30 PLIN2 FABP1 SLCO2B1 …
HEART_GROWTH	0.00811688	0.0394249	0.410987	1.50027	4	82	40	TGFBR2 HEG1 RGS2 IGF1 CXADR RIPK1 BASP1 KCNK2 WT1 FGFR2 S1PR1 RBPJ RBP4 EDN1 GATA6 MAPK11 WNT2 TENM4 ZFPM2 CCNB1 TGFBR3 ERBB4 PTEN AGT AKAP13 FGF2 ARID2 PROX1 NDRG4 YY1 ADRA1A NOTCH1 FOXC1 HAMP SAV1 TGFBR1 CTDP1 HEY2 PIM1 FGFR1
MYELOID_CELL_DIFFERENTIATION	0.0014556	0.0135741	0.410892	1.80502	0	355	123	SFRP1 PTBP3 TGFBR2 LOX PPARG KIT CD109 B2M RASSF2 ACTN1 GPC3 NCKAP1L CCR1 FCER1G APP PRKX IRF4 RIPK1 TYROBP LYN CSF1R C1QC TMOD3 PIP4K2A SFXN1 PRKCB TLR4 GAB2 CD74 TGFB1 ADIPOQ THBS1 IRF7 INPP5D ANXA2 CASP8 UBD MEIS2 LGALS3 F2RL1 HCLS1 MOV10 SNX10 LRRC17 CEBPA LILRB3 RB1 PSEN1 SENP1 ADD1 IKZF1 LRRK1 TLR3 PTPN6 MFHAS1 L3MBTL3 CSF1 JUNB CASP3 CEACAM1 FASN TAL1 PF4 RBPJ PTK2B STAT1 TRIM10 NCAPG2 MYC…
REGULATION_OF_CELL_MORPHOGENESIS_INVOLVED_IN_DIFFERENTIATION	0.00150376	0.0135741	0.410886	1.76317	0	279	112	APOE ACTN4 FBLN1 SEMA3D POSTN NEDD4 SEMA4A ARHGDIA NTRK2 UST SEMA3F PTPRD SEMA3A DOCK5 ADAM10 CFL1 NTN1 ZEB2 TACSTD2 SDC2 PLXNA4 PREX1 SEMA5A PLXNB2 CAPRIN1 BHLHB9 CYFIP1 APOA1 GBP1 CORO1C PSEN1 SHOX2 LRRK2 RELN PDPN FGB FGA MYADM PLXNC1 EPHB2 ISLR2 SEMA3E NGFR PLXNB1 THY1 MAP6 SEMA3G ROBO1 FN1 FGG CALR DBN1 DOCK1 PLXNA2 LPAR3 LIMK1 SEMA4B PAK3 NRCAM CXCL12 ZSWIM6 FLNA SIPA1L1 TUBB2B SLIT2 BMPR2 …
STEROID_BIOSYNTHETIC_PROCESS	0.00153374	0.0135741	0.410642	1.65758	0	156	68	APOE POR HSD17B12 HSD17B11 ASAH1 SRD5A3 ACACA ACLY DHCR24 HSD11B1 SLC27A2 PRLR HMGCS2 SP1 IGFBP7 PBX1 CYB5R3 APOA1 SQLE VDR ADM SREBF2 HMGCR ELOVL6 EGR1 APOB FASN STARD4 ATP1A1 ERLIN2 TSPO ABCG1 NFKB1 KPNB1 MBTPS1 NFYA SCAP ERLIN1 TNF PPARGC1A SDR42E1 PRKAG2 HSD3B7 INSIG1 CYP11A1 GFI1 SEC14L2 BMP5 ACAT2 HSD11B2 CH25H SRD5A1 DKKL1 IDI1 CYP7B1 PROX1 LSS NSDHL ACOX2 ACBD3 NR1H4 PRKAA1 OSBPL3 SLC27A5…
POSITIVE_REGULATION_OF_SUPRAMOLECULAR_FIBER_ORGANIZATION	0.00154321	0.0135741	0.410223	1.69959	0	185	78	SFRP1 APOE NOX4 ARPC1B SH3PXD2B DSTN NCKAP1 NCKAP1L IQGAP2 MET APP LPAR1 MYO1C WIPF1 CFL1 EVL SWAP70 HCK CORO1B SEMA5A GSN F2RL1 PYCARD CYFIP1 APOA1 ARPC5 ALOX15 RB1 PSEN1 CX3CL1 BAG4 TRPV4 MAPRE1 GMFB PTK2B CDC42EP4 WAS ACTR3 EDN1 PLEK LIMK1 PPM1F CD47 SPIRE1 FLNA GPR65 GMFG RHOA ICAM1 BRAF SMAD3 MYOC CTTN BAIAP2 FMN1 S100A10 ARHGEF10 CORO1A ABI2 STMN2 RAC3 NIN SNX9 SERPINF2 BAIAP2L1 WDR1 ARF6 F…
FATTY_ACID_TRANSPORT	0.00811688	0.0394249	0.410173	1.4973	4	82	23	APOE PPARG ANXA1 SLCO2A1 AKT1 ACACA ACE CPT1A PLA2G4A SLC27A2 P2RX4 PLA2G2D PROCA1 THBS1 ACSL1 SYK P2RX7 MFSD2A PLIN2 FABP1 THRSP EDN1 IRS2
ENDOCRINE_SYSTEM_DEVELOPMENT	0.003125	0.0202312	0.409945	1.58304	1	113	48	PDGFRA ANXA1 AKT1 SIDT2 ARID5B CDH1 SMO SOX4 PBX1 EIF2AK3 APOA1 STRA6 WT1 MAPK3 MDK RBPJ DUOX2 CREB1 ALDH1A2 MEN1 GATA6 TSPO FGF10 CDKN1C BRAF SMAD3 SALL1 BMP5 GATA3 SRD5A1 GLI2 CDK6 HNF4A GATA2 PAX8 FSTL3 MSX1 CLOCK FOXO1 TGFBR1 THRA PDPK1 HOXB3 WNT5A TG ONECUT2 ETS1 SMAD2
ORGANIC_ANION_TRANSPORT	0.00144718	0.0135741	0.409918	1.82196	0	417	158	APOC1 APOE PPARG SLC25A10 EMB ANXA1 SLC16A7 SLCO2A1 SLC1A3 AKT1 RGS2 ARL6IP1 ATP8B1 ACACA LRRC8D SLC25A1 NTRK2 SLC36A4 ACE CPT1A PLA2G4A SLC25A24 STARD5 STK39 NPC2 GLTP SLC38A1 APBA1 SLC27A2 P2RX4 PLA2G2D SLC43A2 FOLR2 SFXN1 SLC36A2 PROCA1 ATP10A ABCA1 ABCC1 PRELID1 THBS1 ACSL1 SLC35A3 SLC7A1 SLC11A1 SLC16A2 OSR1 PITPNM1 PLTP SYK APOA1 P2RX7 STRA6 PSEN1 SLC13A4 AVPR1A ATP10B ABAT SLC25A32 SLC37A2…
REGULATION_OF_SECRETION	0.00136054	0.0135741	0.409913	1.88624	0	664	310	SFRP1 GAS6 UCP2 MAP4K4 AACS ANXA1 TLR8 RAB8B POSTN DPP4 MCTP1 NADK ITGAM IGF1 FCER1G TNFRSF1B MBP TNFRSF1A CPT1A LYN CSF1R PAM SRGN STK39 CADPS2 F2R SIDT2 APBA1 PTAFR P2RX4 DHX9 SMPD3 IL17RC RAP1B FCGR2B ANXA5 TM7SF3 PRKCB EZR TLR4 OXTR RSAD2 GAB2 TLR5 ITGB2 CD74 SOX4 ADTRP PTGER3 TGFB1 ADIPOQ SRI CPLX2 CD300A PTPN22 LGALS9 EGFR F2RL1 PYCARD SYK APOA1 GBP1 CASP1 CD34 P2RX7 RAB11FIP1 RAB3D GNAI2 T…
GLAND_DEVELOPMENT	0.00144092	0.0135741	0.409014	1.81541	0	404	139	NTN4 MAN2A1 SFRP1 SULF2 TGFBR2 UCP2 MSN PDGFRA CCND1 AACS ANXA1 AKT1 CLDN1 ESR1 ASNS MET IRF6 CAV1 TNC CSF1R PAM TWSG1 SULF1 CDO1 SERPINF1 SEMA3A ARID5B PRLR NTN1 CDH1 PKD2 OXTR PSAPL1 ALDH1A3 SMO TGFB1 TGM2 PBX1 EGFR SERPINB5 ATP7A APOA1 PCK1 VDR STRA6 E2F8 CEBPA TNFAIP3 PSEN1 WT1 HGF FGFR2 PGR CSF1 EPHX1 CEACAM1 FASN MAPK3 MDK RBPJ DUOX2 EDA ITGA2 ID2 WNT7B CREB1 GLI3 TPH1 ROBO1 ALDH1A2 FA2H IR…
MESENCHYMAL_CELL_DIFFERENTIATION	0.0015456	0.0135741	0.408312	1.69797	0	196	76	SFRP1 TGFBR2 SFRP2 SEMA3D SEMA4A SEMA3F GCNT2 DAB2 SEMA3A CFL1 ZEB2 SMO ADAM15 TGFB1 SEMA5A OSR1 CORO1C HGF LOXL2 FGFR2 PDPN PDCD4 WWTR1 SEMA3E TGFB1I1 MAPK3 EDNRA RBPJ STAT1 GLIPR2 SEMA3G ALDH1A2 FN1 EDN1 EDNRB SEMA4B BAMBI WNT2 NRP2 LRP6 BCL2 HAND2 S100A4 FAM83D FGF10 HIF1A LOXL3 SDCBP OLFM1 EPHA3 SEMA3C SMAD3 DLG5 PAX2 EOMES BMP7 RET TCF21 MSX2 TGFBR3 EDN3 ENG ERBB4 GDNF PTEN BMP5 GREM1 CUL7 T…
ERYTHROCYTE_HOMEOSTASIS	0.00316456	0.0202312	0.408206	1.54539	1	100	47	AXL PTBP3 KIT B2M NCKAP1L LYN TMOD3 SFXN1 INPP5D HCLS1 RB1 SENP1 ADD1 IKZF1 MFHAS1 L3MBTL3 CASP3 TAL1 STAT1 TRIM10 NCAPG2 ID2 ZFP36L1 JAK2 STAT3 RHAG HIF1A HMOX1 FOXO3 HMGB2 ALAS2 SP3 TGFBR3 PKNOX1 AMPD3 FAM210B GATA3 DYRK3 HIPK2 HSPA1B CDK6 ZFPM1 ISG15 KLF2 GATA1 GATA2 ANKRD54
REGULATION_OF_PROTEIN_LOCALIZATION_TO_CELL_PERIPHERY	0.00316456	0.0202312	0.407045	1.541	1	100	38	GPC6 MRAP AKT1 PTPN9 PRKCI MMP14 DAB2 ADAM10 EZR PID1 TGFB1 EGFR LGALS3 GBP1 PPP2R5A GPSM2 CSK EPHB2 PICALM SORBS1 IQSEC2 ARHGEF16 SPTBN1 RAB11FIP2 PLS1 STAC2 CNPY4 EPHA3 GNAI1 TNF TREM2 BCL2L1 ITGA3 PRKCZ LRRC15 ITGB1 PRKCH ARF6
CELL_MORPHOGENESIS_INVOLVED_IN_NEURON_DIFFERENTIATION	0.00141243	0.0135741	0.406877	1.842	0	532	207	NTN4 APOE FLRT2 CDH11 FAM129B EMB SEMA3D SLIT3 SLC1A3 ALCAM NEDD4 SEMA4A APP ARHGDIA NTRK2 CHL1 UST DCLK1 PTPRA ITGA4 CSF1R SEMA3F PTPRD FYN SEMA3A ADAM10 GFRA1 CFL1 NTN1 EVL EZR MATN2 ZEB2 GAB2 SMO SDC2 PLXNA4 EXT1 DOCK7 DOCK10 SPG11 BOC SEMA5A PLXNB2 CAPRIN1 BHLHB9 CYFIP1 DOK2 PTPRM RAC2 RB1 PSEN1 MEF2A SHOX2 LRRK2 FGFR2 RELN B4GALT6 STXBP1 PLXNC1 B3GNT2 EPHB2 GRB7 KIF5C ISLR2 SEMA3E PICALM NGF…
CELLULAR_RESPONSE_TO_DRUG	0.00148588	0.0135741	0.406841	1.76577	0	315	119	CYBB SFRP1 AXL PLCB1 GAS6 ANXA1 CTNNA1 CYP1B1 ADCY3 MET RIPK1 HSP90B1 GNB1 MAP3K5 FYN PTAFR P2RX4 SERPINF1 SMPD3 ACER2 RAP1B FOLR2 CDH1 VIM ADAM15 TGFB1 ADIPOQ XRN1 DPEP1 SIRPA PTPN22 EGFR PCK1 P2RX7 NET1 GNAI2 TNFAIP3 LCN2 AHR HGF LRRK2 TLR3 CCNA2 GCLC SIGMAR1 ADCY7 EGR1 MAP4K1 SLAMF8 EIF4EBP1 MAPK3 FABP1 KCNMB1 KCNQ1 MYC P2RY12 EDN1 MMP3 PPM1F BCL11A ATRX NFKB1 CYBA SLIT2 MAPK13 ICAM1 CFLAR ERR…
RESPONSE_TO_ANTIBIOTIC	0.0014881	0.0135741	0.406526	1.74987	0	283	112	CYBB AXL CCND1 CLDN3 AACS ANXA1 CYP1B1 ADCY3 SLC1A3 RGS2 EPS8 CLDN1 MET RIPK1 TNC PLA2G4A ADCYAP1R1 MAP3K5 CDO1 FYN SMPD3 PENK CIITA ADIPOQ XRN1 SIRPA GSN CASP8 VCAM1 ATP7A NET1 HPGD TNFAIP3 CD14 LCN2 CBL AHR HGF HP HMGCR LRRK2 ABAT FGFR2 SIGMAR1 ADCY7 EGR1 APOBEC1 ADH7 CASP3 EIF4EBP1 FABP1 PTK2B SDC1 KCNMB1 STAT1 CAT RBP4 EDN1 TYMS JAK2 CAPN2 STAT3 BCL2 AOC3 RHOA MAPK13 ICAM1 EFNA5 CYP2E1 GNAI1 …
TYPE_I_INTERFERON_PRODUCTION	0.0031746	0.0202312	0.406513	1.56984	1	115	52	TLR8 ZBP1 TLR7 RNF125 DHX9 TLR4 PLCG2 IRF5 SIRPA IRF7 PTPN22 UBE2L6 PYCARD SYK NLRC5 TLR9 IFIH1 TNFAIP3 CD14 TMEM173 DDX58 TLR3 STAT1 TRIM21 TRIM56 NFKB1 ZCCHC3 HAVCR2 MMP12 PTPN11 HMGB2 NMI ITCH IRF1 STAT6 SETD2 RELA DHX58 TBK1 TLR2 TRIM25 TRAF3 MYD88 AZI2 DTX4 ISG15 YY1 RNF26 NFKB2 RNF216 RIPK2 REL
CELLULAR_RESPONSE_TO_HYDROGEN_PEROXIDE	0.0113636	0.0499728	0.4064	1.48352	6	82	43	AXL ANXA1 CYP1B1 MET RIPK1 MAP3K5 SMPD3 SIRPA NET1 TNFAIP3 LCN2 HGF LRRK2 SIGMAR1 FABP1 MAPK13 PDGFD TRPM2 FOXO3 ARG1 RIPK3 NFE2L2 PAX2 NR4A3 STAT6 SPHK1 SRC RELA IL18BP PAWR KLF4 RNF112 MYB PDE8A SETX PRKAA1 HDAC6 KLF2 ECT2 RHOB FOXO1 PCNA IL18RAP
CELL_PART_MORPHOGENESIS	0.00137931	0.0135741	0.406394	1.85673	0	620	244	NTN4 APOE FLRT2 CDH11 MAP4K4 FAM129B EMB CD44 SEMA3D SLIT3 POSTN IQGAP1 ALCAM NCKAP1 NCKAP1L NEDD4 SEMA4A APP ARHGDIA NTRK2 NBL1 CHL1 UST DCLK1 PTPRA ITGA4 CSF1R SEMA3F PTPRD ENPP2 FYN SEMA3A ADAM10 GFRA1 CFL1 NTN1 EVL EZR MATN2 ZEB2 GAB2 ITGA1 PID1 SMO SDC2 PLXNA4 EXT1 DOCK7 DOCK10 SPG11 BOC CORO1B SEMA5A EGFR GPM6A PLXNB2 CAPRIN1 BHLHB9 ATP7A CYFIP1 DOK2 PTPRM MOV10 RAC2 CORO1C PSEN1 MEF2A SHOX…
ACTIN_FILAMENT_POLYMERIZATION	0.0015361	0.0135741	0.406378	1.63545	0	153	66	ARPC1B TMOD2 NCKAP1 NCKAP1L EPS8 IQGAP2 MYO1C TMOD3 WIPF1 EVL PREX1 HCK CORO1B GSN ADD3 PYCARD CYFIP1 HCLS1 VILL ARPC5 CAPZA1 ALOX15 ADD1 MYADM BAG4 FAM107A GMFB PTK2B MICALL2 CDC42EP4 TWF1 WAS ACTR3 PAK3 JAK2 SPTBN1 SPTAN1 SPIRE1 SLIT2 GMFG RHOA ICAM1 PPP1R9A WASF3 CTTN CAPG BAIAP2 FMN1 MTPN PSTPIP1 SPTBN2 CORO1A ABI2 TMSB10 RAC3 TTC17 SNX9 BAIAP2L1 ARF6 CDC42EP5 ARHGAP6 AIF1 ADD2 FCHSD2 LATS1 S…
ESTABLISHMENT_OR_MAINTENANCE_OF_CELL_POLARITY	0.00156006	0.0135741	0.406295	1.68554	0	193	88	CLIC4 RHOJ MSN FRMD4B PARVA CTNNA1 SFRP5 FRMD4A NCKAP1L PRKCI UST ARF4 CAP1 CYTH3 PTK7 WWC1 UBXN2B RAP1B CFL1 DOCK7 GSN PARD6G ARPC5 FAT1 PARD3B GPSM2 MYO9A DOCK2 WEE1 PARVG SPN PTK2B PDCD6IP WNT7B ACTR3 DOCK8 RAB11FIP2 SPINT2 OPHN1 CAMSAP3 FERMT1 RHOA FGF10 ROCK1 DLG5 VANGL2 KIF20B MPP7 TEK CD3G MYH9 MCPH1 SLC9A3R1 CDC42BPB MAP7 PRKCZ WDR1 GATA3 ARF6 HSP90AA1 SLC9A1 MAP1B PARD6B LIN7A CCL19 RPGR…
CELLULAR_COMPONENT_MORPHOGENESIS	0.00126263	0.0135741	0.4061	1.91032	0	1024	413	CLIC4 NTN4 AXL APOE ACTN4 COL14A1 FBLN1 NOX4 KIT RHOJ FLRT2 CDH11 MSN LAMB1 SCARA3 PDGFRA TMOD2 MAP4K4 PARVA FAM129B EMB MERTK HEG1 CLDN3 CD44 ACTN1 ANXA1 COL12A1 SEMA3D SLIT3 SLC1A3 POSTN IQGAP1 ANTXR1 ALCAM NCKAP1 NCKAP1L LIPA EPS8 NEDD4 ST14 MET SEMA4A APP SYNE3 LPAR1 ARHGDIA NTRK2 PECAM1 NBL1 CHL1 UST SH3D19 DCLK1 PTPRA ITGA4 CSF1R SEMA3F PTPRD TMOD3 CD9 ENPP2 SIDT2 FYN CAP1 ITGA8 CDH19 SEMA3…
SEX_DIFFERENTIATION	0.00155039	0.0135741	0.405814	1.70164	0	229	71	SFRP1 AXL KIT PDGFRA CCND1 SGPL1 MERTK SFRP2 CTNNA1 NRIP1 SLIT3 ESR1 FNDC3A ADCYAP1R1 MMP14 SEMA3A ARID5B BASP1 NCOA4 ADAM15 MMP19 PBX1 TBC1D20 OSR1 LHFPL2 STRA6 RETN WT1 CBL TLR3 TIFAB MGST1 PGR CASP3 ARRB1 SDC1 NIPBL MAMLD1 RBP4 INHBB GATA6 WNT2B FZD4 ATRX FLNA LRP6 BCL2 SLIT2 FGF10 ICAM1 LFNG BRIP1 FOXO3 PTPN11 ZFPM2 SALL1 HMGB2 ROR2 IRX5 BCL2L11 TYRO3 TCF21 PCYT1B BCL2L1 TCF7 LRP2 WDR19 HOXA1…
POSITIVE_REGULATION_OF_CELL_PROJECTION_ORGANIZATION	0.00146628	0.0135741	0.405398	1.77371	0	336	141	APOE NEGR1 ARSB KIT DOCK11 RAB8B IQGAP1 RGS2 DPYSL3 NCKAP1 FZD1 EPS8 PRKCI LPAR1 CAMK1D ARHGDIA NTRK2 GRN LYN PTPRD ENPP2 FYN PTK7 SERPINF1 DZIP1 NTN1 ZEB2 PLXNA4 SEPT9 CORO1B SEMA5A GPM6A PLXNB2 CAPRIN1 BHLHB9 F2RL1 ATP7A CYFIP1 ENC1 P2RX7 RAC2 CORO1C PSEN1 LCN2 CX3CL1 SHOX2 HGF RELN PLXNC1 GPRC5B ISLR2 NGFR PLXNB1 ITSN2 PTK2B MAP6 ITGA2 CDC42EP4 TWF1 ROBO1 CCDC88A FN1 SHANK2 P2RY12 DBN1 PLXNA2 …
RESPONSE_TO_TRANSFORMING_GROWTH_FACTOR_BETA	0.00155039	0.0135741	0.404919	1.69789	0	229	81	SFRP1 TGFBR2 LOX NOX4 CD109 POSTN GDF10 CLDN1 CHST11 CAV1 TWSG1 GCNT2 DAB2 FYN ITGA8 FMOD PENK ZYX CLEC3B TGFB1 THBS1 HPGD ZFP36L2 TGFBRAP1 CGN CBL GLG1 FGFR2 TGFB1I1 ZFP36L1 CREB1 ACVR1C MEN1 LTBP2 CAV2 EDN1 FBN2 SMURF2 RUNX3 BAMBI WNT2 ACVRL1 FERMT1 APAF1 GDF5 PRDM16 PTPRK BMPR2 RHOA LRG1 CIDEA CDKN1C CFLAR CILP ASPN ROCK1 SDCBP LTBP1 PDE3A PDGFD SMAD3 ARG1 SKIL PPARGC1A NR3C1 TGFBR3 PML F11R Z…
DEVELOPMENT_OF_PRIMARY_SEXUAL_CHARACTERISTICS	0.00157233	0.0135741	0.404738	1.67545	0	190	56	SFRP1 KIT PDGFRA CCND1 SGPL1 SFRP2 CTNNA1 NRIP1 SLIT3 ESR1 FNDC3A ADCYAP1R1 MMP14 SEMA3A ARID5B BASP1 NCOA4 ADAM15 MMP19 TBC1D20 OSR1 LHFPL2 RETN WT1 CBL TLR3 MGST1 PGR CASP3 ARRB1 SDC1 MAMLD1 INHBB GATA6 WNT2B FZD4 ATRX FLNA BCL2 SLIT2 ICAM1 LFNG BRIP1 FOXO3 ZFPM2 SALL1 HMGB2 IRX5 BCL2L11 TCF21 PCYT1B BCL2L1 LRP2 WDR19 HOXA11 SRC
GASTRULATION	0.00151976	0.0135741	0.404666	1.63498	0	158	67	SFRP1 TGFBR2 LAMB1 SFRP2 COL12A1 UGDH GPC3 MBP ITGA4 MMP14 TWSG1 ITGA8 EYA2 ITGB2 ADIPOQ EXT1 OSR1 APOA1 FGFR2 MMP2 MYADM TAL1 ITGA2 FN1 ITGB4 GATA6 APLN LRP6 BMPR2 ELF5 MMP15 IL1RN TENM4 ITGB3 SMAD3 PAX2 COL11A1 VANGL2 EOMES BMP7 NR4A3 SETD2 ITGA3 HOXA11 COL5A2 LAMA3 ITGB1 FRS2 KLF4 COL8A1 HMGA2 PHLDB2 MMP8 SOX17 MMP9 CRB2 HNF4A COL6A1 FOXC1 HNF1B LAMB3 SNAI1 INHBA SMAD4 WNK1 RNF2 ATOH8
POSITIVE_REGULATION_OF_DNA_BINDING_TRANSCRIPTION_FACTOR_ACTIVITY	0.0015361	0.0135741	0.404602	1.70425	0	239	99	PPARG KIT DDR2 AKT1 FZD1 ESR1 PRKCI APP CAV1 CAMK1D RIPK1 DHX9 ARID5B PRKCB TLR4 TRIM14 ITGB2 SMO TGFB1 CARD11 NFAM1 LGALS9 PYCARD HCLS1 IRAK3 TLR9 IL1RAP CX3CL1 TMEM173 DDX58 TLR3 RELN MID2 IRAK2 ADAM8 BTK RIPK4 CAT TRIM21 EDA EDN1 IRAK4 JAK2 STAT3 WNT2 FZD4 EIF2AK2 NFKB1 LRP6 CD36 ICAM1 CFLAR STK3 TAB3 SMAD3 TRIM37 RIPK3 TNF PPARGC1A IL18R1 HDAC4 MALT1 LTF KRAS AIM2 CD40 RPS6KA4 MTPN ADCY1 TRAF…
RESPONSE_TO_GROWTH_FACTOR	0.00137741	0.0135741	0.404129	1.85227	0	643	239	DCN SFRP1 SULF2 EEF1A1 TGFBR2 LOX NOX4 GAS6 XIAP FLRT2 PDGFRA MYOF FAM129B CD109 SORT1 CD44 ANXA1 SFRP2 COMP GPC3 POSTN SFRP5 AKT1 IQGAP1 GDF10 CHRDL1 FZD1 CLDN1 NEDD4 GREM2 GAS1 CHST11 APP CAV1 ADAMTS12 TNFRSF1B RIPK1 NTRK2 TNC NBL1 PTBP1 MYO1C TWSG1 GCNT2 SULF1 DAB2 FYN SPRED1 ITGA8 PCSK6 KLB SMPD3 FMOD TNMD LUM PRKCB PENK ZYX CLEC3B TGFB1 LGMN TPR THBS1 CORO1B ACAP2 EGFR CCBE1 ESRP1 MEIS2 VCAM…
NEURON_DEVELOPMENT	0.00126422	0.0135741	0.403938	1.89839	0	992	372	NTN4 SFRP1 APOE NEGR1 ARSB C3 FLRT2 CDH11 GPM6B CLMN LAMB1 DENND5A MAP4K4 FAM129B EMB B2M SFRP2 CTNNA1 SEMA3D SLIT3 SLC1A3 POSTN AKT1 IQGAP1 RGS2 PTPN9 DPYSL3 ALCAM NCKAP1 CAMSAP2 NCKAP1L FZD1 NEDD4 PRKCI UHMK1 SEMA4A APP ASAP1 PTPRF LPAR1 CAMK1D ARHGDIA NTRK2 TNC GRN NBL1 CHL1 UST DCLK1 LYN PTPRA ITGA4 C1QA CSF1R SEMA3F PTPRD ARF4 FYN PTK7 SERPINF1 SEMA3A APOD ADAM10 GFRA1 CFL1 NTN1 GAK EVL CDH1…
REGULATION_OF_INNATE_IMMUNE_RESPONSE	0.001443	0.0135741	0.403524	1.78213	0	372	141	APOE IFNGR1 PPARG XIAP SERPING1 TLR8 ZBP1 COLEC12 ITGAM UNC93B1 ESR1 TLR7 CTSB FCER1G CAV1 PIK3AP1 IRF4 RIPK1 GRN HSP90B1 LYN RNF125 PSMB8 FYN DHX9 CLEC7A FCGR2B CTSS TLR4 RSAD2 MNDA TLR5 ITGB2 PLCG2 LGMN CARD11 CD300A IRF7 PTPN22 LGALS9 HCK CASP8 PARP14 IFNAR2 RNASEL HPX F2RL1 PYCARD SYK IRAK3 TICAM2 RPS6KA3 NLRC5 TLR9 IFIH1 TNFAIP3 CD14 TMEM173 DDX58 PYHIN1 MUC4 TLR3 LBP CLEC10A SAMHD1 FGB FGA …
RESPONSE_TO_NUTRIENT	0.00153139	0.0135741	0.403479	1.68361	0	206	69	CYBB SFRP1 POR TGFBR2 ARSB PPARG C2 GAS6 CCND1 AACS SFRP2 POSTN BCHE TNC HSP90B1 FYN P2RX4 FOLR2 PENK ABCA1 TGFB1 ADIPOQ ACSL1 EGFR GSN VCAM1 APOA1 P2RX7 VDR GNAI2 HMGCR SLC6A4 LIPG ADIPOR2 GCLC STAT1 CAT ITGA2 STC1 CREB1 ALDH1A2 P2RY12 TYMS TNKS SELL SERPINC1 TSPO BCL11A APAF1 CYBA PTN CD4 IGFBP2 ADA BRIP1 HMOX1 ARG1 CASR BMP7 CD40 CD3E TNFRSF11B AQP3 LRAT TAF1 CNR1 UGT1A1 PTEN RELA
POSITIVE_REGULATION_OF_NEURON_DIFFERENTIATION	0.0014771	0.0135741	0.403149	1.75567	0	323	130	APOE TIMP2 NEGR1 ARSB IQGAP1 RGS2 DPYSL3 FZD1 PRKCI LPAR1 CAMK1D ARHGDIA NTRK2 GRN NBL1 LYN PTPRD FYN PTK7 SERPINF1 NTN1 ZEB2 TCF12 PLXNA4 MMD SEMA5A PLXNB2 CAPRIN1 BHLHB9 CYFIP1 ENC1 PSEN1 CX3CL1 SHOX2 HGF PCP4 RELN PLXNC1 GPRC5B ISLR2 NGFR PLXNB1 ITSN2 PTK2B MAP6 TWF1 ROBO1 FN1 SHANK2 DBN1 PLXNA2 LPAR3 LIMK1 PAK3 NRCAM CXCL12 FZD4 GDF5 BCL2 PTN TUBB2B SLIT2 BMPR2 VWC2 RHOA CFLAR EFNA5 EPHA3 BRA…
POSITIVE_REGULATION_OF_DEFENSE_RESPONSE	0.00145138	0.0135741	0.402889	1.79068	0	421	159	C3 XIAP TLR8 IL6ST ZBP1 COLEC12 ITGAM UNC93B1 ESR1 TLR7 CTSB FCER1G APP CAV1 PIK3AP1 IRF4 RIPK1 TNFRSF1A GRN HSP90B1 LYN C1QA RNF125 OSMR PSMB8 FYN PIK3CG DHX9 IL17RC CLEC7A CTSS TLR4 PENK RSAD2 MNDA TLR5 ITGB2 PLCG2 PTGER3 LGMN TGM2 CARD11 CD300A IRF7 PTPN22 HCK EGFR CASP8 HPX F2RL1 PYCARD SYK IRAK3 TICAM2 RPS6KA3 NLRC5 TLR9 CEBPA IFIH1 TNFAIP3 ADORA2B CD14 CX3CL1 TMEM173 DDX58 PYHIN1 MUC4 LRRK2…
POSITIVE_REGULATION_OF_PEPTIDASE_ACTIVITY	0.00153374	0.0135741	0.402642	1.62529	0	156	58	FBLN1 PPARG SFRP2 ANTXR1 CTSH APP CAV1 DAP MBP RIPK1 GRN LYN PERP MAP3K5 F2R FYN ACER2 LGMN PRELID1 LGALS9 GSN EIF2AK3 CASP8 PYCARD RCN3 CASP1 SENP1 DLC1 DAPK1 PCOLCE PICALM NGFR MAPK3 ARRB1 MYC ROBO1 ACVR1C FN1 CASP4 JAK2 PPM1F STAT3 CASP8AP2 APAF1 PCOLCE2 GRAMD4 RHOA BID CFLAR F3 LCK SMAD3 TNF BCL2L11 AIM2 PML EGLN3 PMAIP1
CELL_MATURATION	0.00158479	0.0135741	0.402333	1.59188	0	142	51	NTN4 AXL PTBP3 PPARG C3 ABHD2 APP C1QA CEBPA RB1 CX3CL1 LRRK2 PGR B4GALT6 L3MBTL3 BTK TAL1 PTK2B ID2 FGG EDNRB TYMS NRCAM BCL11A BCL2 CDKN1C HIF1A BFSP1 PDE3A FOXO3 MYOC LHX6 CCNB1 IRX5 RET NR4A2 CCR6 RAC3 IHH FAM210B GATA3 PTH1R LGI4 POU2F2 CNTN2 CCL19 TRIP13 GLDN ANG KLF2 GATA2
REGULATION_OF_CELL_POPULATION_PROLIFERATION	0.00121359	0.0135741	0.401782	1.92281	0	1390	595	SFRP1 CXCL9 APOE SULF2 POR TIMP2 FBLN1 PTPRJ TGFBR2 NOX4 PPARG KIT IGFBP3 GAS6 OGN XIAP DDR2 PDE1A CLMN LAMB1 PDGFRA CCND1 MAGED1 FAM129B CD109 EPCAM ANXA1 IL6ST SFRP2 COMP CTNNA1 CYP1B1 GPC3 SLIT3 DPP4 PDGFC SFRP5 AKT1 GPNMB CTSH NCKAP1L IGF1 BCHE ESR1 PRKCI CHST11 IRF6 APP CCNI CXADR PLAC8 CAV1 NDRG1 TNFRSF1B CCL8 RIPK1 NTRK2 TNC GRN ACE PLA2G4A TYROBP LYN ITGA4 CSF1R GNAI3 OSMR CD33 TNS3 MAP3K…
POSITIVE_REGULATION_OF_CELL_POPULATION_PROLIFERATION	0.00132979	0.0135741	0.401608	1.86515	0	789	313	SFRP1 TGFBR2 KIT GAS6 DDR2 LAMB1 PDGFRA CCND1 EPCAM ANXA1 IL6ST SFRP2 COMP DPP4 PDGFC AKT1 CTSH NCKAP1L IGF1 ESR1 PRKCI CCNI PLAC8 NTRK2 TNC GRN LYN ITGA4 CSF1R GNAI3 OSMR TNS3 MAP3K5 F2R THBS4 GCNT2 CCND2 PTAFR KLB DHX9 SMPD3 ACER2 ADAM10 FOLR2 NTN1 HPSE TLR4 TGFA CCND3 GAB2 TSHR PID1 SMO CD74 SOX4 SP1 TGFB1 LGMN TGM2 CLEC11A CARD11 THBS1 TNFRSF13C LGALS9 PBX1 ANXA2 HCK BST1 SEMA5A PTGFR EGFR SA…
REGULATION_OF_ANATOMICAL_STRUCTURE_SIZE	0.00142045	0.0135741	0.401606	1.79852	0	454	186	APOE LIMA1 PIK3C2A MSN ARPC1B TMOD2 COMP SEMA3D DSTN AKT1 RGS2 NCKAP1 NCKAP1L EPS8 IQGAP2 SEMA4A LRRC8D CAV1 ACE MYO1C SEMA3F TMOD3 WIPF1 VAV2 F2R PTAFR SEMA3A DOCK5 CFL1 SCPEP1 NTN1 EVL EZR OXTR SWAP70 ITGA1 ACTA2 LRRC8B PLXNA4 PREX1 HCK CORO1B SEMA5A EGFR GSN ADD3 F2RL1 PYCARD ATP7A CYFIP1 PTPRM HCLS1 VILL ARPC5 P2RX7 CAPZA1 ALOX15 ADORA2B ADD1 ADM AVPR1A HMGCR LRRK2 SLC6A4 LRRC8C FGB GCLC FGA …
INTERACTION_WITH_HOST	0.0015528	0.0135741	0.401397	1.65292	0	181	68	AXL IFITM2 MRC1 GAS6 DPP4 CLDN1 NEDD4 CTSB CCR5 MET CXADR CAV1 CCL8 ANPEP SELPLG IFITM3 CDH1 CD74 TGFB1 LGALS9 EGFR GSN CASP8 CBL MID2 IFITM1 TRIM59 TRIM10 TRIM21 ITGA2 TMPRSS2 TNFRSF14 UVRAG CAV2 TYMS EIF2AK2 CD86 KPNB1 ICAM1 CD4 EFNB3 SLC1A5 CTNND1 CLEC5A CD81 SERPINB9 IFIT1 ITGB3 SMAD3 ITCH BCL2L11 TYRO3 NCAM1 ITGB7 PML VPS4B F11R LDLR BCL2L1 SMC3 GYPA SRC CDHR3 HYAL1 ITGB1 THOC3 TRIM25 HIPK2
REGULATION_OF_ACTOMYOSIN_STRUCTURE_ORGANIZATION	0.011041	0.0487877	0.40126	1.48733	6	86	39	SFRP1 NOX4 SH3PXD2B MET LPAR1 EVL TACSTD2 APOA1 TMEFF2 DLC1 S1PR1 BAG4 WAS EDN1 LIMK1 ALMS1 PPM1F CD47 WASF2 GPR65 RHOA ROCK1 BRAF PPP1R9A SMAD3 MYOC ARAP1 S100A10 ARHGEF10 SERPINF2 AKAP13 ARHGEF5 SLC9A1 ARHGAP6 SDC4 PHLDB2 PROX1 PTGER4 STMN1
REGULATION_OF_EMBRYONIC_DEVELOPMENT	0.00623053	0.0322006	0.40121	1.56086	3	119	49	SFRP1 PLCB1 FAM129B SFRP2 FZD1 IGF1 MBP SULF1 LAMA4 PTK7 ADIPOQ RACGAP1 CELSR1 OSR1 APOA1 MYADM NIPBL FZD3 WNT2B WNT2 STK4 LFNG IL1RN STK3 TENM4 NKD1 NFE2L2 VANGL2 BMP7 GPR161 RPS6KA6 GDNF COL5A2 LAMA3 GATA3 FZD2 KLF4 SUFU PHLDB2 SOX17 GRHL3 CRB2 HNF4A NOTCH1 GATA1 GATA2 HNF1B TRIP12 SNAI1
POSTSYNAPSE_ORGANIZATION	0.00156006	0.0135741	0.401185	1.60088	0	148	60	APOE ACTN1 NDRG1 SRGN SEMA3F PTPRD ARF4 FYN ADAM10 CFL1 FCGR2B LGMN DOCK10 CAPRIN1 BHLHB9 IL1RAP LRRK2 RELN SLC7A11 EPHB2 ACTG1 MYH10 SHANK2 CNKSR2 DBN1 PAK3 OPHN1 NRCAM NRP2 WASF2 GLRB PTN SIPA1L1 TANC1 PPP1R9A ZMYND8 NGEF CTTN SPTBN2 ABI2 ITGA3 GDNF TMEM108 PTEN MTMR2 NRXN1 MAGI2 GAP43 CTNND2 ARF6 EPHA4 LHFPL4 DGKB CDH2 ITPKA LRP8 ARHGAP39 ACTR2 CAPRIN2 NOS1AP
NEGATIVE_REGULATION_OF_ESTABLISHMENT_OF_PROTEIN_LOCALIZATION	0.0015361	0.0135741	0.401006	1.61383	0	153	52	SFRP1 GAS6 UCP2 MAP4K4 ANXA1 TLR8 SRGN F2R APOD FCGR2B ANXA5 EZR RSAD2 ADTRP ADIPOQ PTPN22 F2RL1 APOA1 GBP1 CD34 RAB11FIP1 TNFAIP3 CX3CL1 HMGCR LRRK2 CSK PFKL BAG4 C1QTNF3 FFAR4 MDFIC CD200R1 ACVR1C IL1R2 FN1 OS9 CHP1 INHBB BANK1 LMAN1 APOA2 PPM1F FERMT1 CD36 CIDEA IL33 PTPN11 DERL3 TNF BARD1 INSIG1 PML
IMMUNE_RESPONSE_REGULATING_SIGNALING_PATHWAY	0.00140845	0.0135741	0.400564	1.80056	0	473	204	PTPRJ KIT XIAP ARPC1B SH2B2 TLR8 COLEC12 NCKAP1 CTSH NCKAP1L ITGAM UNC93B1 ESR1 TLR7 CTSB FCER1G CAV1 PIK3AP1 IRF4 RIPK1 HSP90B1 LYN RNF125 MYO1C PSMB8 CD33 WIPF1 VAV2 FYN PIGR BTNL9 CLEC7A FCGR2B CTSS C3AR1 PRKCB EZR TLR4 RSAD2 GAB2 MNDA TLR5 ITGB2 PLCG2 CMTM3 LGMN CARD11 CD300A IRF7 PTPN22 NFAM1 INPP5D HCK CASP8 LGALS3 F2RL1 CYFIP1 SYK GBP1 ARPC5 IRAK3 TICAM2 RPS6KA3 TLR9 IFIH1 TNFAIP3 PSEN1 CD…
REGULATION_OF_VIRAL_LIFE_CYCLE	0.0046875	0.0261588	0.400404	1.5462	2	113	40	IFITM2 PABPC1 ISG20 CCL8 TOP2A IFITM3 RSAD2 CD74 LGALS9 ZC3HAV1 ANXA2 TBC1D20 GSN RNASEL BST2 MID2 IFITM1 TRIM59 TRIM10 TRIM21 TMPRSS2 OAS3 CCL5 CAV2 ADARB1 PPIB ADAR EIF2AK2 BCL2 CD4 FAM111A IFIT1 TNF FMR1 LTF TOP2B PML VPS4B PLSCR1 SMC3
EMBRYONIC_MORPHOGENESIS	0.00141643	0.0135741	0.400394	1.8104	0	524	209	SFRP1 TGFBR2 LAMB1 PDGFRA SFRP2 COL12A1 UGDH GPC3 FZD1 LUZP1 ST14 RECK GREM2 CHST11 MBP ITGA4 EFEMP1 MMP14 TWSG1 SULF1 PTK7 ITGA8 CFL1 NTN1 EYA2 PKD2 ZEB2 ALDH1A3 ITGB2 SMO SOX4 TGFB1 ADIPOQ EXT1 PBX1 GNA12 CELSR1 PLXNB2 OSR1 DACT1 APOA1 STRA6 PSEN1 ADM LRIG3 SHOX2 DLC1 SHROOM3 FGFR2 TIFAB MMP2 MYADM EPHB2 RBPMS2 TAL1 TGFB1I1 MAPK3 NIPBL ITGA2 ID2 ZFP36L1 WNT7B GLI3 ALDH1A2 AHI1 FN1 RBP4 RSPO3 ED…
RESPONSE_TO_CAMP	0.00473186	0.0263463	0.400165	1.49839	2	94	35	NOX4 APP CDO1 PTAFR PIK3CG RAP1B EZR PKD2 PENK ADIPOQ MMP19 PCK1 WT1 AHR HCN4 JUNB DUOX2 PTK2B SDC1 STAT1 KCNQ1 STC1 ZFP36L1 IGFBP5 BRAF SLC8A3 CPS1 FOSB AREG TEK THBD ITPR2 RELA CITED1 DUOX1
POSITIVE_REGULATION_OF_NEURON_PROJECTION_DEVELOPMENT	0.0015083	0.0135741	0.399729	1.69298	0	248	104	APOE NEGR1 ARSB IQGAP1 RGS2 DPYSL3 FZD1 PRKCI LPAR1 CAMK1D ARHGDIA NTRK2 GRN LYN PTPRD FYN PTK7 SERPINF1 NTN1 ZEB2 PLXNA4 SEMA5A PLXNB2 CAPRIN1 BHLHB9 CYFIP1 ENC1 PSEN1 CX3CL1 SHOX2 HGF RELN PLXNC1 GPRC5B ISLR2 NGFR PLXNB1 ITSN2 PTK2B MAP6 TWF1 ROBO1 FN1 SHANK2 DBN1 PLXNA2 LPAR3 LIMK1 PAK3 CXCL12 FZD4 PTN TUBB2B SLIT2 BMPR2 RHOA CFLAR EFNA5 EPHA3 BRAF PPP1R9A PLXNA1 SKIL ZMYND8 DLG5 FMR1 NFE2L2 B…
SMOOTHENED_SIGNALING_PATHWAY	0.00465116	0.0259955	0.39938	1.56768	2	124	45	SFRP1 POR TGFBR2 CTNNA1 GPC3 GAS1 DZIP1 RAB34 SMO BOC RB1 SHOX2 FGFR2 TTC21B GLI3 HIPK1 FGF10 PTCH1 SCUBE1 TTBK2 ARL13B CDON CHSY1 DLG5 ROR2 RORA IFT80 CD3E SCUBE3 IFT81 GPR161 WDR19 NDST1 IHH EVC2 HIPK2 IFT122 KCTD11 SUFU GAS8 RPGRIP1L NSDHL GLI2 CENPJ TMEM231
SEGMENTATION	0.00956938	0.0441719	0.399307	1.48048	5	88	26	SFRP1 SFRP2 SEMA3F PCSK6 SEMA3A BASP1 ZEB2 OSR1 PSEN1 WT1 TIFAB RBPJ ALDH1A2 PLXNA2 NRP2 LRP6 ABI1 MEOX1 IRX1 LFNG SEMA3C SMAD3 IRX2 NKD1 ROR2 EGR2
CELLULAR_RESPONSE_TO_OXYGEN_CONTAINING_COMPOUND	0.00127714	0.0135741	0.399044	1.87347	0	979	384	CYBB SFRP1 AXL CXCL9 POR CD68 MYO5A NOX4 PPARG MRC1 PLCB1 GAS6 PIK3C2A UCP2 MSN PDGFRA MAP4K4 SIK2 AACS SH2B2 ANXA1 CTNNA1 NRIP1 CYP1B1 RAB8B ADCY3 PDGFC AKT1 COLEC12 NCF1 GNG2 RARRES2 NADK ADNP2 CLDN1 IGF1 ACACA ESR1 PRKCI CCR5 MET APP LITAF CAV1 TNFRSF1B LPAR1 RIPK1 NTRK2 TNC HSP90B1 CPT1A GNB1 LYN PTPRA ITGA4 MYO1C RAB31 PDE3B MAP3K5 SIDT2 CMA1 FYN PTAFR P2RX4 PIK3CG PTK7 SERPINF1 SMPD3 RAP1B …
SPROUTING_ANGIOGENESIS	0.0031746	0.0202312	0.398952	1.52792	1	106	47	RHOJ PIK3C2A PARVA ANXA1 AKT1 RECK SPRED1 ADTRP THBS1 SEMA5A CCBE1 E2F8 LOXL2 CEACAM1 SEMA3E NGFR PTK2B ROBO1 CREB3L1 RSPO3 STARD13 ACVRL1 AKT3 SLIT2 RHOA FLT4 MAP3K3 HMOX1 TEK HDAC9 E2F2 ITGB1 EGR3 GREM1 FGF2 KLF4 JAK1 ADAMTS9 CLEC14A JMJD8 ESM1 KDR KLF2 FOXC2 NOTCH1 GATA2 VEGFC
SENSORY_ORGAN_DEVELOPMENT	0.00140845	0.0135741	0.398775	1.79253	0	476	192	CLIC4 MAN2A1 TGFBR2 KIT RHOJ PDGFRA SH3PXD2B KERA MERTK CYP1B1 C1QB CHRDL1 KCNK3 PRKCI NTRK2 SMOC1 GNB1 EFEMP1 TWSG1 PTK7 ITGA8 SERPINF1 NTN1 ZEB2 VIM ALDH1A3 TGFB1 KCNK2 TBC1D20 EGFR GPM6A ESRP1 CELSR1 MEIS2 OSR1 PTPRM ATP2B4 FAT1 STRA6 XRN2 CEBPA PSEN1 WT1 LRIG3 CCNA2 FGFR2 TIFAB SLC7A11 BCAR3 EPHB2 COL8A2 MAPK3 RBPJ SHROOM2 DUOX2 ATF6 THY1 NIPBL KCNQ1 RAB11FIP4 LAMC3 WNT7B GLI3 ALDH1A2 AHI1 MY…
REGULATION_OF_LIPID_BIOSYNTHETIC_PROCESS	0.00151745	0.0135741	0.398317	1.61717	0	163	61	APOC1 APOE POR C3 ANXA1 ELOVL5 AKT1 ASAH1 ACACA TNFRSF1A ABCD2 SMPD3 SP1 ADIPOQ IGFBP7 CCDC3 FABP5 APOA1 ORMDL3 SQLE VDR ADM SREBF2 AVPR1A HMGCR ELOVL6 ADIPOR2 EGR1 APOB CEACAM1 FASN LPGAT1 STARD4 SORBS1 CREB1 ATP1A1 THRSP ERLIN2 CAPN2 TSPO ABCG1 NFKB1 KPNB1 MBTPS1 NFYA APOC3 SCAP ERLIN1 TNF PPARGC1A SIK1 BRCA1 PRKAG2 INSIG1 LDLR GFI1 FPR2 SEC14L2 CDK4 RGN BMP5
GLYCOPROTEIN_BIOSYNTHETIC_PROCESS	0.00147275	0.0135741	0.398221	1.72544	0	302	118	DCN MAN2A1 PLCB1 DSE ST3GAL1 BGN UGDH GALNT15 SRD5A3 GCNT1 IGF1 C1GALT1 CHST11 UST SOAT1 STT3A ST8SIA6 MAN1A2 GCNT2 ACER2 ENTPD5 ITM2B TUSC3 GFPT2 DPY19L1 MAN1C1 EXT1 TMTC4 ATP7A MFNG GXYLT1 VCAN PSEN1 TMTC3 MUC4 ST6GALNAC5 ST6GAL1 MGAT5 CHST14 MGAT3 PGM3 B3GNT3 B4GALT6 TMTC1 B3GALT2 B3GNT2 EOGT DSEL SERP1 ALG10B HS3ST3B1 B3GALNT1 MUC15 HS3ST1 HS2ST1 CHST3 CHP1 BACE2 GALNT12 ALG9 MPDU1 CHPF LMAN1…
REGULATION_OF_MAPK_CASCADE	0.00138122	0.0135741	0.398096	1.8248	0	644	227	SFRP1 APOE TIMP2 IGFBP4 FBLN1 PTPRJ NOX4 KIT IGFBP3 PLCB1 GAS6 PDGFRA MAP4K4 MAGED1 CD44 RASSF2 SFRP2 MAGI3 PDGFC AKT1 IQGAP1 NCF1 RGS2 GDF10 GPNMB IGF1 CCR1 PELI2 APP CAV1 CCL8 PLCE1 LPAR1 RIPK1 NTRK2 LYN CSF1R STK39 MAP3K5 F2R GCNT2 SPRED1 PIK3CG KLB WWC1 SEMA3A RAP1B FCGR2B EZR TLR4 TGFA ZEB2 ITGA1 TIMP3 PDE5A CD74 TGFB1 ADIPOQ SIRPA CD300A THBS1 PTPN22 LGALS9 EGFR MLKL DACT1 F2RL1 PYCARD SYK …
NEGATIVE_REGULATION_OF_MAPK_CASCADE	0.0015361	0.0135741	0.397957	1.60156	0	153	55	SFRP1 APOE FBLN1 PTPRJ SFRP2 AKT1 RGS2 CAV1 LYN SPRED1 EZR TLR4 TIMP3 ADIPOQ SIRPA CD300A PTPN22 DACT1 F2RL1 GBP1 P2RX7 IRAK3 PTPRC HMGCR CSK PTPN6 PDCD4 EPHB2 ARRB1 MYC MEN1 MAPK8IP1 AMBP RGS14 EIF3A ERRFI1 PBK DUSP4 CAMK2N1 ITCH PTPN1 BMP7 RGS3 MECOM RPS6KA6 SPRED2 TAOK3 CNKSR3 AIDA SLC9A3R1 PTEN SH3RF2 NCOR1 ATF3 MARVELD3
VITAMIN_METABOLIC_PROCESS	0.00313972	0.0202312	0.397956	1.53134	1	110	37	TCN2 VNN3 PSAT1 ACPP FOLR2 ABCC1 LGMN ACP5 PDXK CYB5R3 PLTP GC VDR ALDH1L1 ENPP1 SLC25A32 GCLC VNN1 ALDH1A2 RBP1 SLC2A3 SLC46A1 MTHFD1L NFKB1 SLC52A3 SLC23A2 TNF SLC23A1 SLC2A1 LRAT CYP11A1 GFI1 LRP2 RGN MTHFD2 CRABP1 TTPA
MEMBRANE_LIPID_BIOSYNTHETIC_PROCESS	0.00466563	0.0260566	0.397542	1.56272	2	128	56	SGPL1 SGMS2 ELOVL5 ASAH1 ASAH2 TNFRSF1A SPTLC2 ELOVL4 ST8SIA6 SMPD3 ACER2 PRKD3 ALDH3B2 CERS6 ORMDL3 P2RX7 PGAP1 ELOVL6 ST6GALNAC5 B4GALT6 B3GALT2 CERS5 FA2H SPTLC3 B4GALNT1 SGPP1 ACER3 ELOVL1 CERS2 DEGS1 PIGN TNF SGPP2 ST3GAL4 SGMS1 MPPE1 ALDH3B1 SPTLC1 UGCG PIGH SPHK1 ELOVL2 KDSR PIGZ CERS4 GBA ELOVL7 ACER1 ALDH3A2 PRKD1 ST8SIA4 A4GALT ST6GALNAC3 B3GNT5 PRKAA1 CWH43
MULTICELLULAR_ORGANISM_GROWTH	0.00310559	0.0202312	0.397237	1.57125	1	138	45	CLIC4 SGPL1 SH3PXD2B HEG1 COMP IGF1 APP PLAC8 APBA1 SMPD3 ARID5B EZR SMO LGMN ADD1 FGFR2 ATRN CSF1 WWTR1 DUOX2 NIPBL ZFP36L1 CREB1 ADARB1 PPIB ZMPSTE24 STAT3 ETNK2 ATRX PLS1 GDF5 BCL2 BBS2 NPY1R CDKN1C GRHL2 PTCH1 PTPN11 SPTBN2 DIO3 GHR IHH IGF2 CDK4 APBA2
ANATOMICAL_STRUCTURE_FORMATION_INVOLVED_IN_MORPHOGENESIS	0.00127877	0.0135741	0.396904	1.86234	0	966	421	CLIC4 CYBB DCN TGFBI SFRP1 CXCL9 TGFBR2 PPARG C3 RHOJ PIK3C2A LAMB1 PDGFRA MYOF LEPR TMOD2 PTGIS PARVA FAM129B CD109 ITGA6 ACTN1 ANXA1 SFRP2 COL12A1 CYP1B1 AKT1 GPNMB CTSH FZD1 LUZP1 ST14 C1GALT1 RECK SEMA4A PRKX CAV1 ENPEP C6 GRN PECAM1 TYROBP ITGA4 PERP MMP14 TMOD3 PDE3B VAV2 CD9 TWSG1 ENPP2 THBS4 CMA1 SULF1 THBS2 SPRED1 PIK3CG PTK7 ITGA8 SERPINF1 ANPEP SMPD3 APOD TNMD KRT19 CFL1 HPSE C3AR1 EYA…
NEGATIVE_REGULATION_OF_CELL_PROJECTION_ORGANIZATION	0.00152672	0.0135741	0.396897	1.61019	0	164	55	APOE DENND5A MAP4K4 B2M SEMA3D PTPN9 DPYSL3 SEMA4A ASAP1 LPAR1 ARHGDIA SEMA3F FYN SEMA3A NTN1 GAK EVL VIM TACSTD2 SEMA5A PSEN1 LRRK2 CD38 EPHB2 SEMA3E NGFR TRPV4 THY1 STAP1 SEMA3G SEMA4B BCL11A CERS2 SLIT2 RHOA EFNB3 SEMA3C PMP22 NGEF RAP1GAP2 ARHGAP4 STX1B MYLIP CTSZ DAB1 STMN2 RTN4RL2 GFI1 ITGA3 PTEN CCP110 ARF6 EPHA4 TBC1D30 HRG
NEGATIVE_REGULATION_OF_NEURON_DEATH	0.00157233	0.0135741	0.396871	1.62521	0	178	62	AXL APOE AKT1 GPNMB FZD1 PRKCI NTRK2 NCOA7 GRN CHL1 F2R FYN SERPINF1 LGMN BHLHB9 PPT1 CD34 PSEN1 CX3CL1 CBL AP2B1 LRRK2 SLC7A11 GCLC STXBP1 CSF1 ADAM8 MDK ARRB1 PTK2B NONO CREB1 CD200R1 JAK2 STAT3 ERBB3 GDF5 BCL2 C5AR1 RHOA HIF1A ROCK1 BRAF HMOX1 PPARGC1A TYRO3 CCL2 KRAS NR4A3 CORO1A BCL2L1 KDM2B NDNF GDNF NR4A2 CITED1 TOX3 CX3CR1 HIPK2 GBA PM20D1 GRIK2
SENSORY_ORGAN_MORPHOGENESIS	0.0015456	0.0135741	0.396248	1.66277	0	230	103	MAN2A1 PRKCI NTRK2 EFEMP1 PTK7 ITGA8 NTN1 ALDH1A3 TBC1D20 CELSR1 OSR1 PTPRM FAT1 STRA6 LRIG3 FGFR2 TIFAB BCAR3 EPHB2 COL8A2 MAPK3 SHROOM2 THY1 NIPBL GLI3 AHI1 RBP4 EDN1 FZD3 BCR FBN2 CALB1 STAT3 WNT2B WNT2 HIPK1 LRP6 BCL2 PTN PRKRA FGF10 FZD6 HIF1A HDAC1 NKD1 SALL1 CDON ROR2 PAX2 COL11A1 VANGL2 IRX5 BMP7 SP3 DLX5 NR4A3 INSIG1 FJX1 ZEB1 OSR2 ABI2 DIO3 KDM2B WDR19 SLC9A3R1 PROM1 LCTL MFAP2 IHH COL5…
TELENCEPHALON_DEVELOPMENT	0.00153139	0.0135741	0.396153	1.66324	0	221	84	PLCB1 LAMB1 LPAR1 NTRK2 CSF1R TACC1 SEMA3A OXTR ZEB2 ALDH1A3 SMO GNG12 PLXNA4 EXT1 EGFR ATP2B4 XRN2 PSEN1 AVPR1A UBA6 LRRK2 RELN MFSD2A SLC7A11 EPHB2 CASP3 MDK ID2 GLI3 ROBO1 MYH10 P2RY12 EMX2 SRGAP2 DIXDC1 CXCL12 NRP2 BCL11B FLNA LRP6 PHLPP2 SLIT2 BBS2 RHOA FOXP2 PAX5 JAKMIP1 HIF1A SLC8A3 KCNA1 ARL13B HDAC1 SALL1 CDON LHX6 EOMES MBOAT7 SLC2A1 DLX5 NR4A3 DAB1 RTN4RL2 KDM2B MCPH1 ERBB4 TMEM108 CEP…
REGENERATION	0.0015625	0.0135741	0.39529	1.61591	0	176	66	AXL SULF2 TGFBR2 PPARG GAS6 UCP2 CCND1 MAP4K4 ANXA1 CTNNA1 POSTN CLDN1 IGF1 PTPRF TNC GRN APOD MATN2 ADAM15 TGFB1 PRPS2 LCP1 EGFR GSN NNMT APOA1 ANGPT2 ADM HGF CCNA2 THY1 PTPN12 GLI3 TYMS JAK2 APOA2 CXCL12 TSPO BCL2 CERS2 C5AR1 FGF10 FLT3 CFLAR LGR6 BRAF CPQ PTCH1 EPPK1 HMOX1 CCNB1 STK24 NINJ1 NR4A3 MTPN TGFBR3 RTN4RL2 UGT1A1 ERBB4 IHH PTEN CDK4 RGN PTPRU GAP43 EPHA4
APPENDAGE_DEVELOPMENT	0.00152672	0.0135741	0.395286	1.60544	0	165	60	ITGA6 SFRP2 COMP GPC3 RECK CHST11 SMOC1 PAM SOX4 PBX1 PCSK5 GNA12 OSR1 PSEN1 SHOX2 FGFR2 SLC7A11 NIPBL GLI3 ALDH1A2 PLXNA2 FBN2 ITGB4 ATRX AFF3 GDF5 LRP6 HAND2 BMPR2 FGF10 GRHL2 FZD6 FRAS1 PTCH1 SEMA3C HDAC1 SALL1 ROR2 ECE1 BCL2L11 BMP7 FMN1 DLX5 MSX2 GJA5 CRABP2 OSR2 WDR19 HOXA11 FREM2 IHH BMPR1B SKI TFAP2A ZNRF3 GREM1 IFT122 MYH3 TWIST1 RNF165
ALCOHOL_METABOLIC_PROCESS	0.00155039	0.0135741	0.394987	1.64157	0	197	83	APOC1 APOE LIMA1 PLCB1 MYOF LEPR TTC39B CYP1B1 SRD5A3 ASAH2 APP LIPE PLCE1 SOAT1 NPC2 DGAT1 PLD4 ALDH1A3 ABCA1 PLCG2 INPP5D APOBR ALDH3B2 APOA1 SQLE CEBPA SREBF2 TTR DHRS9 APOB ADH7 PLCB3 PON1 CAT ISYNA1 PLCB4 ALDH1A2 OSBPL5 RBP4 ERLIN2 SGPP1 APOA2 INPP4B RDH12 ABCG1 RDH11 MBTPS1 SCAP ERLIN1 PPIP5K2 SGPP2 ALDH2 ALDH3B1 LRAT LDLR CYP11A1 SYNJ1 EPHX2 MOGAT1 SPHK1 GK5 PTEN BMP5 APOF GBA ITPK1 SERPIN…
MALE_SEX_DIFFERENTIATION	0.00470219	0.0262209	0.394784	1.55703	2	137	38	SFRP1 KIT PDGFRA CCND1 SGPL1 SFRP2 CTNNA1 ESR1 FNDC3A MMP14 SEMA3A ARID5B NCOA4 ADAM15 TBC1D20 LHFPL2 WT1 CBL TLR3 MGST1 SDC1 MAMLD1 GATA6 WNT2B ATRX FLNA BCL2 FGF10 ICAM1 BRIP1 ZFPM2 HMGB2 ROR2 BCL2L11 TCF21 BCL2L1 LRP2 HOXA11
POSITIVE_REGULATION_OF_INTRACELLULAR_SIGNAL_TRANSDUCTION	0.00131579	0.0135741	0.39446	1.84194	0	870	358	DCN AXL APOE ACTN4 TIMP2 IGFBP4 PTPRJ NOX4 KIT IGFBP3 PLCB1 GAS6 PDGFRA MAP4K4 MAGED1 CD44 TRIM44 RASSF2 MRAP PDGFC AKT1 IQGAP1 NCF1 GPNMB NEDD4 IGF1 ESR1 CCR1 TLR7 PELI2 MET APP LITAF CAV1 PIK3AP1 CCL8 PLCE1 LPAR1 RIPK1 NTRK2 TNFRSF1A LYN ADCYAP1R1 PTBP1 CSF1R STK39 MAP3K5 F2R GCNT2 FYN SPRED1 P2RX4 PIK3CG KLB WWC1 SHISA5 SEMA3A RAP1B HPSE FCGR2B PRKCB PKD2 SELP TLR4 TGFA ZEB2 ITGA1 PDE5A CD74 T…
REGULATION_OF_NEURON_PROJECTION_DEVELOPMENT	0.00140845	0.0135741	0.394027	1.76376	0	448	174	SFRP1 APOE NEGR1 ARSB DENND5A MAP4K4 B2M SFRP2 SEMA3D AKT1 IQGAP1 RGS2 PTPN9 DPYSL3 CAMSAP2 FZD1 NEDD4 PRKCI SEMA4A ASAP1 PTPRF LPAR1 CAMK1D ARHGDIA NTRK2 GRN UST LYN SEMA3F PTPRD FYN PTK7 SERPINF1 SEMA3A ADAM10 CFL1 NTN1 GAK ZEB2 VIM SDC2 PLXNA4 PREX1 SEMA5A PLXNB2 CAPRIN1 BHLHB9 CYFIP1 ENC1 MOV10 PSEN1 CX3CL1 SHOX2 HGF LRRK2 RELN CD38 PLXNC1 EPHB2 GPRC5B ISLR2 SEMA3E NGFR TRPV4 PLXNB1 ITSN2 PTK…
MEMBRANE_FUSION	0.00620155	0.0321413	0.393862	1.54258	3	123	30	GAS6 ANXA1 RAB8B CCR5 GNAI3 CD9 UBXN2B LRMP FOLR2 RAB34 CPLX2 ANXA2 SPG11 ANKFY1 TGFBRAP1 TAP2 SEPT8 STXBP1 STXBP6 NSF SAMD9L TAP1 RAB8A EEA1 UVRAG CAV2 CALR CHP1 STX11 TAPBP
AGING	0.0015015	0.0135741	0.393816	1.69553	0	288	101	MME DCN TIMP2 CD68 TGFBR2 NOX4 SERPING1 UCP2 COMP CTNNA1 AKT1 KRT14 CLDN1 CTSC APP LITAF TNFRSF1B C1QA SERPINF1 APOD PENK ITGB2 TGFB1 INPP5D GSN VCAM1 PCK1 RETN PSEN1 ADM CX3CL1 ATM LOXL2 HMGCR LRRK2 ABAT GCLC PDCD4 PICALM MAPK3 SERP1 KCNMB1 CAT ID2 RBL1 CREB1 CANX KMO MSH6 CALR EDN1 WRN EDNRB ZMPSTE24 TYMS MBD2 STAT3 TSPO APAF1 BCL2 CNP AKT3 RPN2 ICAM1 CDKN1C SCAP PAX5 IGFBP5 IGFBP2 MAP3K3 PPP1R…
NEGATIVE_REGULATION_OF_NEURON_DIFFERENTIATION	0.00153139	0.0135741	0.393749	1.64129	0	203	80	APOE DENND5A MAP4K4 B2M SEMA3D PTPN9 DPYSL3 SEMA4A APP ASAP1 LPAR1 ARHGDIA SEMA3F SEMA3A NTN1 GAK VIM DTX1 PBX1 SEMA5A PSEN1 LRRK2 SLC6A4 CD38 EPHB2 SEMA3E NGFR TRPV4 THY1 ID2 SEMA3G GLI3 CALR EDNRB SEMA4B DIXDC1 BCL11A CERS2 SLIT2 RHOA EFNB3 SEMA3C PMP22 FOXO3 NGEF RAP1GAP2 ARHGAP4 BMP7 STX1B MYLIP CTSZ DAB1 DIO3 STMN2 RTN4RL2 GFI1 PTEN ARF6 EPHA4 ID4 SEMA6B CNTN2 SEMA7A ASPM LRP1 RUFY3 PTPRO IT…
CELLULAR_RESPONSE_TO_EXTERNAL_STIMULUS	0.00147493	0.0135741	0.393673	1.70435	0	304	113	FADS1 CYBB SFRP1 AXL CD68 PPARG GAS6 ALB UCP2 SIK2 ITGA6 TLR8 PIEZO2 SFRP2 POSTN AKT1 TLR7 CBS ASNS DAP TNC TNFRSF1A HSP90B1 LYN ITGA4 CADPS2 MAP3K5 FYN P2RX4 FOLR2 TLR4 PENK TLR5 TGFB1 EGFR EIF2AK3 CASP8 VCAM1 PCK1 CASP1 P2RX7 VDR LAMP2 ADORA2B LCN2 PTPRC CBL SREBF2 AVPR1A CNN2 LRRK2 TLR3 UPP1 GCLC NUAK2 GAS2L1 MAPK3 FAM107A SLC39A4 ITGA2 SESN3 ATP1A1 P2RY12 WRN INHBB TNKS WNT2B MAP3K14 EIF2AK2 …
REACTIVE_OXYGEN_SPECIES_METABOLIC_PROCESS	0.00316957	0.0202312	0.393596	1.55731	1	142	63	CYBB TGFBR2 NOX4 SH3PXD2B CYP1B1 NCF1 ITGAM RIPK1 TYROBP GNAI3 ARF4 ITGB2 PID1 TGFB1 PREX1 PRCP ACP5 THBS1 SOD3 BST1 EGFR F2RL1 ATP7A SYK P2RX7 GNAI2 RAC2 NCF2 LRRK2 FBLN5 DUOX2 VAV1 EDN1 MMP3 BCR TSPO CYBA BCL2 CD36 PDK3 HIF1A DUOXA1 CPS1 RIPK3 TNF NFE2L2 PAX2 F2 BMP7 BRCA1 NCF4 SESN2 PMAIP1 EPHX2 CD177 FPR2 SH3PXD2A RGN AGT DUOXA2 TFAP2A DUOX1 TLR2
REGULATION_OF_LIPID_METABOLIC_PROCESS	0.00145773	0.0135741	0.393275	1.71986	0	340	127	FADS1 APOC1 APOE POR PPARG C3 KIT PDGFRA TTC39B ANXA1 ELOVL5 AKT1 ASAH1 ACACA CAV1 TNFRSF1A CPT1A LYN ABCD2 NPC2 VAV2 PIK3CG TBL1X SMPD3 APOD PNPLA2 PSAPL1 ABCA1 HMGCS2 SP1 TGFB1 ADIPOQ IGFBP7 CCDC3 ACSL1 PIK3R5 FABP5 APOA1 MTMR9 ORMDL3 RGL1 PPP2R5A SQLE VDR RB1 ADM SREBF2 AVPR1A HMGCR ELOVL6 GSTZ1 ADIPOR2 EGR1 APOBEC1 APOB CEACAM1 FASN PLIN2 FGR LPGAT1 FABP1 PTK2B PDPR STARD4 NCOA2 SORBS1 ID2 RB…
MAINTENANCE_OF_PROTEIN_LOCATION	0.00629921	0.032396	0.393242	1.4801	3	96	38	CLMN AKT1 YWHAB CAV1 SYNE3 NBL1 SRGN DZIP1 FLNB EZR PKD2 SRI GSN VPS13C TWF1 OS9 DBN1 FBN2 HK1 TSPO FLNA BCL3 CD4 LTBP1 NFKBIE GRIK5 BARD1 INSIG1 PML TMSB10 IGSF11 SP100 SUFU LATS1 TONSL VPS13D VPS13A ANKRD13C
MESENCHYME_DEVELOPMENT	0.00150376	0.0135741	0.392849	1.66381	0	243	93	SFRP1 TGFBR2 SFRP2 SEMA3D NEDD4 SEMA4A SEMA3F GCNT2 DAB2 PTK7 SEMA3A BASP1 CFL1 ACTG2 PKD2 ZEB2 ACTA2 SMO ADAM15 TGFB1 SEMA5A OSR1 CORO1C WT1 HGF LOXL2 FGFR2 PDPN PDCD4 WWTR1 SEMA3E TGFB1I1 MAPK3 EDNRA RBPJ STAT1 MYC GLIPR2 ZFP36L1 SEMA3G ROBO1 ALDH1A2 FN1 EDN1 EDNRB SEMA4B BAMBI WNT2 ACVRL1 NRP2 ERBB3 LRP6 BCL2 HAND2 S100A4 FAM83D BMPR2 FGF10 MEOX1 HIF1A LOXL3 SDCBP OLFM1 EPHA3 SEMA3C SMAD3 ZFPM…
NEGATIVE_REGULATION_OF_CELL_POPULATION_PROLIFERATION	0.00139276	0.0135741	0.392681	1.7903	0	604	257	SFRP1 APOE TIMP2 FBLN1 PTPRJ TGFBR2 NOX4 PPARG IGFBP3 OGN CLMN MAGED1 FAM129B CD109 SFRP2 CTNNA1 CYP1B1 GPC3 SLIT3 SFRP5 GPNMB BCHE IRF6 APP CXADR CAV1 NDRG1 CCL8 RIPK1 TYROBP LYN CSF1R CD33 CD9 F2R TWSG1 SULF1 SERPINF1 PLA2G2D APOD TNMD FCGR2B ENPP3 PKD2 MNDA ITGA1 PDE5A SOX4 TGFB1 ADIPOQ IGFBP7 CD300A THBS1 KCNK2 INPP5D LGALS9 RASSF5 ZBTB7C PTPRM MTSS1 STRN TES VDR CEBPA DPT TNFAIP3 RB1 ADM WT1…
NEGATIVE_REGULATION_OF_TRANSPORT	0.00143885	0.0135741	0.392662	1.74263	0	405	154	APOC1 SFRP1 GAS6 GPM6B UCP2 MAP4K4 ANXA1 TLR8 AKT1 RGS2 MCTP1 NEDD4 CAV1 TNFRSF1B TNFRSF1A SRGN STK39 F2R YWHAQ APOD CTTNBP2NL RAP1B FCGR2B ANXA5 PRKCB EZR PKD2 OXTR RSAD2 PID1 CD74 ADTRP PTGER3 TGFB1 ADIPOQ SRI SIRPA TPR CD300A THBS1 PTPN22 LGALS9 LGALS3 OSR1 F2RL1 ATP7A CYFIP1 FABP5 APOA1 GBP1 CD34 RAB11FIP1 ARHGAP1 SESTD1 GNAI2 TLR9 TNFAIP3 BST2 CX3CL1 SREBF2 HMGCR ENPP1 LRRK2 ABAT CSK ANKRD13…
RESPONSE_TO_CALCIUM_ION	0.00311526	0.0202312	0.39255	1.5547	1	140	43	CLIC4 CCND1 IQGAP1 NEDD4 CAV1 SLC25A24 CPNE8 ANXA5 PKD2 PENK LGMN DPEP1 THBS1 ALOX5AP EGFR P2RX7 ALOX15 ADD1 CHP2 MEF2A FGB FGA APOBEC1 JUNB ACTG1 PTK2B SDC1 KCNMB1 CPNE3 FGG EDN1 PTGES KCNMB4 BRAF SEC31A TRPM2 TRPC1 FOSB CASR ADCY1 AQP3 SLC25A23 NCSTN
LEARNING	0.00621118	0.0321458	0.392446	1.53474	3	122	40	KIT ADCY3 BCHE APP NTRK2 ARF4 FYN PRKAR2B LGMN MEIS2 PPT1 STRA6 UBA6 HMGCR RELN SLC7A11 LRRN4 EPHB2 GMFB ATXN1L CREB1 SHANK2 RGS14 PTN FOXP2 HIF1A TANC1 BRAF SLC8A3 HRH2 KRAS SYNJ1 AGT NRXN1 ITGB1 TLR2 CTNS CNTN2 ACTR2 NDRG4
HEPATICOBILIARY_SYSTEM_DEVELOPMENT	0.00625	0.0322331	0.392116	1.54751	3	135	48	MAN2A1 SULF2 UCP2 CCND1 AACS ANXA1 CLDN1 ASNS MET ARID5B PKD2 TGFB1 EGFR ATP7A PCK1 E2F8 CEBPA TNFAIP3 HGF EPHX1 CEACAM1 NIPBL ITGA2 GLI3 ALDH1A2 ZMPSTE24 TYMS GATA6 RPS6KA1 PTN CFLAR PTCH1 ADA HMOX1 SMAD3 ARG1 CPS1 LSR KRAS SP3 CCDC40 PCK2 SEC63 TGFBR3 UGT1A1 IHH RELA RGN
ACID_SECRETION	0.0031746	0.0202312	0.39168	1.50007	1	106	26	ANXA1 SLC1A3 NTRK2 ACE PLA2G4A APBA1 P2RX4 PLA2G2D PROCA1 OXTR PTGER3 SYK P2RX7 SNX10 AVPR1A ABAT STXBP1 KCNQ1 KMO ABCC3 EDN1 PPFIA4 SLC1A5 PLA2G2F CASR HRH2
REGULATION_OF_MAP_KINASE_ACTIVITY	0.00147929	0.0135741	0.391661	1.69731	0	309	100	SFRP1 APOE PTPRJ NOX4 KIT MAGED1 SFRP2 PDGFC IQGAP1 RGS2 IGF1 CAV1 PLCE1 LPAR1 RIPK1 LYN STK39 MAP3K5 F2R SPRED1 PIK3CG TLR4 TGFA ZEB2 ITGA1 PDE5A CD74 TGFB1 ADIPOQ CD300A THBS1 PTPN22 EGFR MLKL SYK PIK3R5 P2RX7 IRAK3 TLR9 ADORA2B PSEN1 PTPRC HGF HMGCR LRRK2 CSK PTPN6 PDCD4 IRAK2 EPHB2 MAP4K1 ADAM8 MAPK3 ARRB1 PTK2B MDFIC WNT7B ROBO1 S1PR2 EDN1 MAPK8IP1 LPAR3 FZD10 PAK3 SHC1 MAP4K3 JAK2 MAPK11 RG…
POSITIVE_REGULATION_OF_MAP_KINASE_ACTIVITY	0.00154083	0.0135741	0.391609	1.64913	0	238	88	NOX4 KIT MAGED1 PDGFC IQGAP1 IGF1 PLCE1 LPAR1 RIPK1 STK39 MAP3K5 F2R PIK3CG TLR4 TGFA ZEB2 ITGA1 PDE5A CD74 TGFB1 THBS1 EGFR MLKL SYK PIK3R5 P2RX7 TLR9 ADORA2B PSEN1 PTPRC HGF LRRK2 CSK IRAK2 MAP4K1 ADAM8 MAPK3 ARRB1 PTK2B MDFIC WNT7B ROBO1 S1PR2 EDN1 LPAR3 FZD10 PAK3 SHC1 MAP4K3 JAK2 MAPK11 FZD4 MAP3K14 EIF2AK2 DBNL MAP3K9 C5AR1 FGF10 MST1R FLT3 MAP3K3 BRAF CD81 TAB3 RASGRP1 ERN1 PDGFD MAP3K2 PT…
REGULATION_OF_CELL_PROJECTION_ORGANIZATION	0.0013947	0.0135741	0.39144	1.7833	0	600	236	SFRP1 APOE NEGR1 ARSB KIT DENND5A MAP4K4 DOCK11 CD44 B2M SFRP2 SEMA3D RAB8B AKT1 IQGAP1 RGS2 PTPN9 DPYSL3 NCKAP1 CAMSAP2 ATP8B1 FZD1 EPS8 NEDD4 PRKCI SEMA4A CAV1 ASAP1 PTPRF LPAR1 CAMK1D ARHGDIA NTRK2 GRN UST LYN SEMA3F PTPRD ENPP2 FYN PTK7 SERPINF1 SEMA3A DZIP1 ADAM10 CFL1 NTN1 GAK FCGR2B EVL EZR ZEB2 VIM TACSTD2 SDC2 PLXNA4 PREX1 SEPT9 CORO1B SEMA5A GPM6A PLXNB2 CAPRIN1 BHLHB9 F2RL1 ATP7A CYFIP…
RESPONSE_TO_PEPTIDE	0.00140845	0.0135741	0.391397	1.75199	0	448	175	CYBB POR MYO5A PPARG PIK3C2A UCP2 SIK2 SORT1 SH2B2 ANXA1 RAB8B ADCY3 AKT1 IQGAP1 RARRES2 GCNT1 IGF1 PRKCI APP CAV1 LYN PTPRA ITGA4 MYO1C RAB31 PDE3B CDO1 FYN SMPD3 RAP1B AHSG PRLR FCGR2B ANXA5 PRKCB TLR4 CCND3 OXTR PRKAR2B VIM TSHR IRF5 PID1 SP1 TGFB1 ADIPOQ LGMN ATP1A3 PTPN22 VCAM1 LPIN2 CYFIP1 PCK1 KLF3 PTPRE ATP6V1A GNAI2 RETN TNFAIP3 PSEN1 ADM ENPP1 CSK CCNA2 GCLC ADCY7 EGR1 APOBEC1 CEACAM1 E…
NEGATIVE_REGULATION_OF_TRANSMEMBRANE_RECEPTOR_PROTEIN_SERINE_THREONINE_KINASE_SIGNALING_PATHWAY	0.0031746	0.0202312	0.390817	1.49676	1	106	57	SFRP1 TGFBR2 CD109 SFRP2 CHRDL1 FZD1 GREM2 CHST11 CAV1 NBL1 TWSG1 TGFB1 GLG1 CTDSPL2 RBPMS2 TGFB1I1 CAV2 FBN2 SMURF2 BAMBI PRDM16 VWC2 CIDEA CILP ASPN LTBP1 SMAD3 SKIL SOSTDC1 TGFBR3 LRP2 SKI SMURF1 MAGI2 GREM1 HTRA1 HIPK2 VEPH1 TMPRSS6 ADAM17 TRIM33 NOTCH1 HSPA5 FSTL3 HTRA4 FST TGFBR1 EID2 DACT2 PDPK1 WNT5A GDF3 ONECUT2 SIRT1 SMAD2 WFIKKN2 SMAD6
REGULATION_OF_ANATOMICAL_STRUCTURE_MORPHOGENESIS	0.00127389	0.0135741	0.390411	1.83359	0	974	410	CYBB DCN NTN4 SFRP1 CXCL9 APOE SULF2 POR ACTN4 FBLN1 TGFBR2 PPARG C3 KIT RHOJ PIK3C2A MSN PTGIS PARVA MAGED1 FAM129B CD44 ANXA1 GPC6 SFRP2 SEMA3D CYP1B1 GPC3 VAT1 POSTN SFRP5 GPNMB CTSH FZD1 EPS8 NEDD4 RECK ESR1 SEMA4A ADAMTS12 TNFRSF1B SYNE3 C6 LPAR1 MBP ARHGDIA NTRK2 TNFRSF1A GRN UST TYROBP SH3D19 CSF1R PSMB8 SEMA3F PTPRD PDE3B ENPP2 THBS4 CMA1 SULF1 DAB2 FYN THBS2 SPRED1 PTK7 SERPINF1 SEMA3A T…
MAINTENANCE_OF_LOCATION	0.00150376	0.0135741	0.390352	1.68007	0	289	130	CXCL9 APOE MYO5A PPARG C3 PLCB1 ALB CLMN GM2A TTC39B RASA3 NRIP1 BSCL2 AKT1 YWHAB CCR5 CAV1 PLCE1 SYNE3 HSP90B1 NBL1 LYN SOAT1 SRGN F2R DZIP1 ANXA5 FLNB EZR PKD2 DGAT1 PNPLA2 ABCA1 PLCG2 TGFB1 SRI GSN APOA1 P2RX7 GPSM2 SLC30A7 VPS13C LCN2 PTPRC CX3CL1 SREBF2 MSR1 ENPP1 PTPN6 APOB HEXB PLCB3 PLIN2 PTK2B THY1 EHD1 STARD4 UVRAG TWF1 ACVR1C OS9 CALR DBN1 B4GALNT1 FBN2 HK1 TSPO ABCG1 NFKB1 CYBA FLNA C…
REGULATION_OF_CELL_DEVELOPMENT	0.00132626	0.0135741	0.389704	1.8147	0	827	282	MME MAN2A1 SFRP1 APOE ACTN4 TIMP2 NEGR1 FBLN1 ARSB PPARG KIT FLRT2 DENND5A MAP4K4 FAM129B B2M IL6ST SFRP2 CTNNA1 SEMA3D POSTN AKT1 IQGAP1 RGS2 PTPN9 DPYSL3 CAMSAP2 FZD1 NEDD4 IGF1 RECK PRKCI SEMA4A APP ASAP1 PTPRF LPAR1 CAMK1D ARHGDIA NTRK2 TNFRSF1A GRN NBL1 UST TYROBP LYN C1QA SEMA3F PTPRD FYN IGSF10 P2RX4 PTK7 SERPINF1 SEMA3A DOCK5 ADAM10 CFL1 NTN1 GAK ZEB2 VIM PDE5A SMO TCF12 TACSTD2 TGFB1 ADI…
MONOCARBOXYLIC_ACID_TRANSPORT	0.00625	0.0322331	0.389648	1.53777	3	135	43	APOE PPARG EMB ANXA1 SLC16A7 SLCO2A1 AKT1 ATP8B1 ACACA ACE CPT1A PLA2G4A STARD5 APBA1 SLC27A2 P2RX4 PLA2G2D PROCA1 THBS1 ACSL1 SLC16A2 SYK P2RX7 STRA6 ABAT MFSD2A CEACAM1 PLIN2 FABP1 SLCO2B1 NCOA2 ABCC3 THRSP EDN1 IRS2 CD36 PLA2G2F SLC16A12 SLC10A6 SLC27A6 CASR PRKAG2 FABP4
POSITIVE_REGULATION_OF_HYDROLASE_ACTIVITY	0.0013587	0.0135741	0.389454	1.79192	0	655	318	FAM13A SFRP1 FBLN1 PPARG KIT PLCB1 PDGFRA MAP4K4 DOCK11 TBC1D9 GM2A ITGA6 RASA3 SFRP2 AKT1 IQGAP1 ANTXR1 RGS2 CTSH NCKAP1L ESR1 APP CAV1 DAP CCL8 ASAP1 TBC1D2B LPAR1 MBP ARHGDIA RIPK1 NTRK2 GRN LYN ADCYAP1R1 PERP SRGAP1 MAP3K5 F2R ARF4 FYN PTAFR DHX9 ACER2 USP6NL ARAP2 SRGAP3 RGS5 RIN2 ITGA1 SYDE2 LGMN PRELID1 PREX1 DOCK7 DOCK10 GNA13 CD300A LGALS9 RACGAP1 TBC1D20 ACAP2 EGFR GSN EIF2AK3 CASP8 ARH…
ANION_TRANSPORT	0.00140252	0.0135741	0.389349	1.76178	0	522	180	CLIC4 APOC1 APOE PPARG GABRA3 SLC25A10 EMB ANXA1 SLC16A7 SLCO2A1 SLC1A3 AKT1 CLIC1 RGS2 ARL6IP1 ATP8B1 ACACA LRRC8D SLC25A1 RIPK1 NTRK2 SLC36A4 ACE CPT1A PLA2G4A SLC25A24 STARD5 STK39 CLCA2 NPC2 GLTP SLC38A1 APBA1 SLC27A2 PTAFR P2RX4 PLA2G2D SLC43A2 CLCN5 FOLR2 SFXN1 SLC36A2 PROCA1 ATP10A ABCA1 LRRC8B ABCC1 PRELID1 THBS1 RACGAP1 ACSL1 SLC35A3 SLC7A1 SLC11A1 SLC16A2 OSR1 PITPNM1 PLTP SYK APOA1 P2R…
PROTEIN_DEPOLYMERIZATION	0.00627943	0.0323169	0.38923	1.47409	3	99	44	LIMA1 TMOD2 DSTN CAMSAP2 EPS8 TMOD3 CFL1 GAK SWAP70 SEMA5A GSN ADD3 F2RL1 VILL CAPZA1 ADD1 TRPV4 TWF1 PLEK DNAJC6 SPTBN1 CAMSAP3 SPTAN1 APC TTBK2 CAPG PLEKHH2 MTPN SPTBN2 VPS4B STMN2 SYNJ1 WDR1 SLN MAP1B SH3GL2 ADD2 SPTA1 MICAL1 STMN1 CKAP2 STMND1 HDAC6 SPEF1
REGULATION_OF_PEPTIDASE_ACTIVITY	0.0014556	0.0135741	0.389108	1.70262	0	341	129	POR TIMP2 FBLN1 PPARG C3 GAS6 PROS1 XIAP ANXA8 SERPING1 CD109 CD44 SFRP2 GPC3 AKT1 ANTXR1 ITIH2 CTSH ARL6IP1 RECK APP CAV1 DAP TNFAIP8 MBP RIPK1 GRN LYN PERP PSMB8 MAP3K5 F2R FYN DHCR24 SERPINF1 ACER2 AHSG APLP2 C4B TIMP3 LGMN PRELID1 DPEP1 THBS1 LGALS9 ITIH5 GSN EIF2AK3 CASP8 SERPINB5 PYCARD RCN3 CASP1 RPS6KA3 PI15 SENP1 SPINK5 BST2 HGF DLC1 TFPI PAK2 PZP DAPK1 ECM1 PCOLCE PICALM NGFR MAPK3 ARRB…
NEGATIVE_REGULATION_OF_MULTI_ORGANISM_PROCESS	0.00625	0.0322331	0.388565	1.5335	3	135	63	IFITM2 ISG20 IGF1 CCL8 RNF125 IFITM3 TRIM14 RSAD2 ZC3HAV1 ANXA2 GSN ARHGDIB RNASEL TNFAIP3 SPINK5 BST2 HPGDS LBP MID2 IFITM1 TRIM59 STAT1 TRIM10 TRIM21 OAS3 CCL5 ACVR1C CALR IRF8 EIF2AK2 IL2RA CD36 FAM111A OVGP1 ADA IFIT1 HAVCR2 HDAC1 TNF ITCH LTF PML PLSCR1 DHX58 HTRA1 TRIM25 ARG2 HMGA2 TRIM62 PROX1 KRT6A ISG15 TIMP1 MBL2 SLPI CHMP3 RNF26 TRIM6 CCL3 CCL4 GPATCH3 ZC3H12A POU2F3
NEGATIVE_REGULATION_OF_CELL_DEVELOPMENT	0.00149477	0.0135741	0.388089	1.67173	0	292	79	APOE ACTN4 FBLN1 DENND5A MAP4K4 B2M CTNNA1 SEMA3D POSTN RGS2 PTPN9 DPYSL3 IGF1 SEMA4A APP ASAP1 LPAR1 ARHGDIA SEMA3F SEMA3A NTN1 GAK VIM TACSTD2 TGFB1 DTX1 PBX1 SEMA5A GBP1 CORO1C PSEN1 CX3CL1 LRRK2 SLC6A4 CD38 EPHB2 SEMA3E NGFR TRPV4 THY1 STAP1 ID2 SEMA3G GLI3 CALR EDNRB SEMA4B SRGAP2 DIXDC1 STAT3 TSPO BCL11A BCL2 PTN CERS2 SLIT2 RHOA EFNB3 EFNA5 SEMA3C PMP22 RCC2 FOXO3 NGEF RAP1GAP2 TNF ARHGAP4…
REGULATION_OF_TRANSMEMBRANE_RECEPTOR_PROTEIN_SERINE_THREONINE_KINASE_SIGNALING_PATHWAY	0.00153374	0.0135741	0.387351	1.61845	0	212	72	SFRP1 TGFBR2 LOX XIAP CD109 SFRP2 GPC3 SFRP5 GDF10 CHRDL1 FZD1 GREM2 CHST11 CAV1 NBL1 TWSG1 SULF1 DAB2 ITGA8 PCSK6 TGFB1 THBS1 GLG1 BMP3 SFRP4 CTDSPL2 WWTR1 RBPMS2 TGFB1I1 RBPJ MEN1 CAV2 INHBB FBN2 SMURF2 BAMBI SPTBN1 ACVRL1 FERMT1 GDF5 PRDM16 BMPR2 VWC2 FGF10 LRG1 CIDEA CDKN1C CILP ASPN SDCBP LTBP1 GDF7 SMAD3 SKIL SOSTDC1 BMP7 MSX2 TGFBR3 ZEB1 LRP2 ITGA3 NPNT ENG MYOCD BMP5 SKI SMURF1 CITED1 MAG…
BEHAVIOR	0.00140252	0.0135741	0.385911	1.74318	0	510	189	MME APOE NEGR1 MYO5A KIT PLCB1 LEPR TMOD2 GM2A ADCY3 SLC1A3 DPP4 EPS8 BCHE APP NTRK2 CPT1A CHL1 ARF4 THBS4 APBA1 FYN P2RX4 ITGA8 SERPINF1 PENK OXTR PRKAR2B ALDH1A3 LGMN THBS1 KCNK2 SPG11 EGFR CELSR1 MEIS2 BHLHB9 PPT1 ATP7A STRN STRA6 RETN PSEN1 AVPR1A UBA6 HPGDS HMGCR LRRK2 ABAT SLC6A4 RELN TIFAB SLC7A11 LRRN4 EGR1 EPHB2 GPRC5B HEXB ARCN1 CASP3 TAL1 PICALM MDK GMFB GATM PBX3 NCOA2 SEZ6L ID2 ATXN1…
POSITIVE_REGULATION_OF_CYTOSKELETON_ORGANIZATION	0.00152905	0.0135741	0.3856	1.60949	0	205	74	SFRP1 NOX4 ARPC1B SH3PXD2B DSTN NCKAP1 NCKAP1L IQGAP2 MET LPAR1 MYO1C WIPF1 UBXN2B CFL1 EVL SWAP70 HCK CORO1B SEMA5A GSN F2RL1 PYCARD CYFIP1 HCLS1 APOA1 ARPC5 P2RX7 GPSM2 ALOX15 CX3CL1 BAG4 TRPV4 MAPRE1 GMFB PTK2B STAP1 CDC42EP4 WAS ACTR3 EDN1 PLEK LIMK1 PPM1F CD47 SPIRE1 FLNA GPR65 GMFG RHOA ICAM1 BRAF SMAD3 MYOC CTTN BAIAP2 TEK FMN1 S100A10 ARHGEF10 CORO1A VPS4B ABI2 STMN2 CEP120 PLK4 RAC3 NIN …
TRANSMEMBRANE_RECEPTOR_PROTEIN_SERINE_THREONINE_KINASE_SIGNALING_PATHWAY	0.00147059	0.0135741	0.385556	1.67038	0	306	103	SFRP1 TGFBR2 LOX XIAP CD109 SFRP2 COMP GPC3 SFRP5 GDF10 CHRDL1 FZD1 GREM2 CHST11 CAV1 NBL1 TWSG1 GCNT2 SULF1 DAB2 ITGA8 PCSK6 SMPD3 FMOD ZYX VIM TGFB1 THBS1 HPGD FSTL1 TGFBRAP1 CGN CBL GLG1 BMP3 LNPEP SFRP4 CTDSPL2 PDCD4 WWTR1 EGR1 RBPMS2 TGFB1I1 MAPK3 RBPJ ZFYVE16 CREB1 ACVR1C MEN1 LTBP2 CAV2 INHBB FBN2 SMURF2 BAMBI SPTBN1 ACVRL1 FERMT1 GDF5 PRDM16 PTPRK BMPR2 VWC2 RHOA FGF10 LRG1 CIDEA CDKN1C C…
EPITHELIUM_DEVELOPMENT	0.00126422	0.0135741	0.385056	1.82032	0	1086	433	CLIC4 NTN4 SFRP1 DSP MYO5A TGFBR2 PPARG MSN CCND1 MAGED1 HEG1 CD109 CLDN3 EPCAM CD44 ANXA1 GPC6 SFRP2 GPC3 KRT17 AKT1 IQGAP1 ASAH1 CTSH FZD1 KRT14 CLDN1 LUZP1 ST14 C1GALT1 ESR1 CTSB FNDC3A MET IRF6 PRKX CAV1 ADAMTS12 TNC TNFRSF1A PECAM1 CPT1A KRT71 CSF1R PERP PSMB8 MMP14 SIDT2 SULF1 DAB2 PTK7 PCSK6 SEMA3A TNMD KRT19 RAP1B BASP1 CFL1 NTN1 TAGLN2 HPSE FLNB EZR PKD2 PHGDH ZEB2 PSAPL1 VIM ALDH1A3 ACT…
NEGATIVE_REGULATION_OF_DEVELOPMENTAL_PROCESS	0.00132802	0.0135741	0.384854	1.79065	0	825	347	DCN SFRP1 APOE ACTN4 FBLN1 TGFBR2 PPARG GAS6 DENND5A CCND1 MAP4K4 FAM129B SORT1 B2M ANXA1 SFRP2 CTNNA1 SEMA3D VAT1 POSTN TMEM176B SFRP5 RGS2 PTPN9 DPYSL3 GDF10 IGF1 CCR1 SEMA4A APP CXADR PLAC8 CAV1 ADAMTS12 ASAP1 LPAR1 ARHGDIA RIPK1 LYN EFEMP1 PTBP1 C1QC SRGN SEMA3F PDE3B TWSG1 THBS4 SULF1 THBS2 SPRED1 SERPINF1 WWC1 SEMA3A TNMD AHSG NTN1 GAK FCGR2B TLR4 VIM TMEM176A ABCA1 SMO CD74 TACSTD2 TGFB1 A…
NEUROGENESIS	0.00121951	0.0135741	0.384733	1.84294	0	1426	513	MME NTN4 MAN2A1 SFRP1 AXL APOE TIMP2 NEGR1 ARSB PPARG C3 KIT GAS6 FLRT2 CDH11 GPM6B CLMN LAMB1 DENND5A MAP4K4 FAM129B EMB B2M ANXA1 IL6ST SFRP2 CTNNA1 SEMA3D SLIT3 SLC1A3 POSTN AKT1 IQGAP1 RGS2 PTPN9 DPYSL3 ALCAM NCKAP1 CAMSAP2 NCKAP1L FZD1 ADNP2 NEDD4 BCHE PRKCI UHMK1 MET SEMA4A APP NDRG1 ASAP1 PTPRF LPAR1 CAMK1D ARHGDIA NTRK2 TNC GRN NBL1 CHL1 UST DCLK1 LYN PTPRA ITGA4 C1QA CSF1R SEMA3F PTPRD M…
RESPONSE_TO_STEROID_HORMONE	0.00144509	0.0135741	0.384005	1.68336	0	346	125	CYBB SFRP1 TGFBR2 LOX PPARG CCND1 ANXA1 NRIP1 ABHD2 SLIT3 CLDN1 NEDD4 BCHE ESR1 CAV1 PAM DAB2 CDO1 PTAFR SERPINF1 OXTR RNF4 NCOA4 ADTRP TGFB1 ADIPOQ IGFBP7 THBS1 ATP1A3 EGFR DSG2 PCK1 VDR ZFP36L2 RB1 ADM AVPR1A CLDN4 ACSBG1 TFPI PGR CD38 GLB1 EPHX1 CASP3 EIF4EBP1 TGFB1I1 MDK PGRMC2 FAM107A SDC1 NCOA2 STC1 ZFP36L1 WNT7B ATP1A1 CALR EDN1 PTGER2 TYMS NR3C2 JAK2 APOA2 PAPPA TSPO FHL2 CYBA BCL2 PTN SL…
NEURON_DIFFERENTIATION	0.00127226	0.0135741	0.383873	1.82158	0	1207	432	NTN4 SFRP1 APOE TIMP2 NEGR1 ARSB C3 FLRT2 CDH11 GPM6B CLMN LAMB1 DENND5A MAP4K4 FAM129B EMB B2M SFRP2 CTNNA1 SEMA3D SLIT3 SLC1A3 POSTN AKT1 IQGAP1 RGS2 PTPN9 DPYSL3 ALCAM NCKAP1 CAMSAP2 NCKAP1L FZD1 ADNP2 NEDD4 PRKCI UHMK1 MET SEMA4A APP ASAP1 PTPRF LPAR1 CAMK1D ARHGDIA NTRK2 TNC GRN NBL1 CHL1 UST DCLK1 LYN PTPRA ITGA4 C1QA CSF1R SEMA3F PTPRD ARF4 FYN PTK7 SERPINF1 SEMA3A APOD ADAM10 GFRA1 CFL1 N…
CENTRAL_NERVOUS_SYSTEM_NEURON_DIFFERENTIATION	0.00151976	0.0135741	0.383859	1.55091	0	158	50	SFRP1 CDH11 SFRP2 FZD1 NTRK2 DCLK1 CSF1R SEMA3A ZEB2 SMO SOX4 PLXNA4 ATP7A PSEN1 FGFR2 B4GALT6 EPHB2 TAL1 GLI3 ROBO1 ADARB1 OPHN1 WNT2 NRP2 BCL11B LRP6 SLIT2 PTCH1 GDF7 SALL1 LHX6 RORA EOMES AUTS2 DLX5 ZC4H2 MTPN ERBB4 NR4A2 RAC3 PTEN NIN EPHA4 HSP90AA1 ID4 TSKU SUFU CNTN2 PROX1 GLI2
LIPID_HOMEOSTASIS	0.00623053	0.0322006	0.383467	1.49183	3	119	55	APOE LIMA1 PPARG TTC39B ACACA ACSM3 CAV1 SOAT1 NPC2 DGAT1 PNPLA2 ABCA1 RCN3 APOA1 ORMDL3 CEBPA SREBF2 LIPG MALL APOB ABHD4 EHD1 C1QTNF3 IRS2 ANGPTL4 RBP1 APOA2 TMEM97 ABCG1 APOC3 ABCA12 RORA MYLIP INSIG1 FABP4 MTTP LDLR SESN2 HDAC9 EPHX2 IL18 APOC4 LPL CYP7B1 LDLRAP1 ACOX2 GRAMD1B DGAT2 LIPC NR1H4 PRKAA1 ANGPTL3 HNF4A THADA APOC2
RESPONSE_TO_OXYGEN_CONTAINING_COMPOUND	0.001221	0.0135741	0.38297	1.83211	0	1397	503	CYBB DCN SFRP1 AXL CXCL9 APOE POR CD68 MYO5A TGFBR2 NOX4 PPARG MRC1 PLCB1 GAS6 PIK3C2A UCP2 MSN ARPC1B PDGFRA ILDR2 CCND1 MAP4K4 CSF2RB SIK2 CLDN3 SORT1 AACS SH2B2 ANXA1 CTNNA1 NRIP1 CYP1B1 RAB8B ADCY3 ABHD2 SLIT3 POSTN PDGFC AKT1 IQGAP1 COLEC12 NCF1 RGS2 GNG2 RARRES2 CTSH NADK EPS8 GCNT1 ADNP2 CLDN1 IGF1 BCHE ACACA ESR1 PRKCI ASNS CCR5 MET APP LITAF CAV1 TNFRSF1B LPAR1 RIPK1 NTRK2 TNC HSP90B1 CP…
IMMUNE_SYSTEM_DEVELOPMENT	0.001321	0.0135741	0.382956	1.78702	0	852	329	SFRP1 AXL PTPRJ PTBP3 TGFBR2 LOX PPARG KIT GAS6 IL1RL2 PDGFRA LEPR SGPL1 DOCK11 MERTK CD109 B2M RASSF2 ACTN1 ANXA1 SFRP2 GPC3 TMEM176B NCKAP1L CCR1 FCER1G SEMA4A APP PRKX IRF4 RIPK1 ACE TYROBP LYN ITGA4 CSF1R C1QC PSMB8 TOP2A MMP14 TMOD3 TWSG1 PLA2G2D SMPD3 PIP4K2A FCGR2B SFXN1 PRKCB PLD4 TLR4 RSAD2 GAB2 SWAP70 TMEM176A PLCG2 TCF12 CD74 SOX4 TGFB1 ADIPOQ PRELID1 CARD11 PREX1 DOCK10 THBS1 IRF7 PTP…
HEAD_DEVELOPMENT	0.0013587	0.0135741	0.382667	1.76286	0	684	218	SFRP1 AXL TGFBR2 PLCB1 LAMB1 PDGFRA SGPL1 SFRP2 RGS2 KCNK3 FZD1 ITGAM APP LPAR1 MBP NTRK2 TYROBP DCLK1 CSF1R GNAI3 TACC1 MMP14 CD9 ARF4 TWSG1 CMA1 FYN ITGA8 YWHAQ SEMA3A APOD ARID5B MYO1D BASP1 FCGR2B CDH1 OXTR PHGDH ZEB2 ALDH1A3 SMO GNG12 TGFB1 PLXNA4 EXT1 DOCK7 SEMA5A EGFR PLXNB2 PPT1 PITPNM1 ATP7A ATP2B4 ARPC5 STRA6 XRN2 PSEN1 AVPR1A CRISPLD1 PFKFB3 UBA6 PLP1 ARNT2 LRRK2 DLC1 ABAT PGAP1 SLC6A4…
POSITIVE_REGULATION_OF_PHOSPHORUS_METABOLIC_PROCESS	0.0012987	0.0135741	0.382647	1.7908	0	920	417	APOE TIMP2 IGFBP4 PTPRJ TGFBR2 NOX4 C3 KIT IGFBP3 PLCB1 GAS6 DDR2 PDGFRA CCND1 MAP4K4 MAGED1 CD44 ITGA6 RASSF2 IL6ST SFRP2 ADCY3 PDGFC AKT1 IQGAP1 NCF1 GDF10 GPNMB RARRES2 NCKAP1L FZD1 IGF1 CCR1 PELI2 APP CAV1 CCL8 PLCE1 LPAR1 RIPK1 NTRK2 FAM129A TNFRSF1A ACE PECAM1 LYN PTBP1 CSF1R STK39 VAV2 MAP3K5 F2R TWSG1 ENPP2 THBS4 GCNT2 DAB2 FYN RAD50 CCND2 PIK3CG KLB WWC1 SEMA3A RAP1B PRLR FCGR2B PKD2 TLR…
CELLULAR_RESPONSE_TO_ENDOGENOUS_STIMULUS	0.00127226	0.0135741	0.382458	1.81525	0	1218	423	CYBB SFRP1 SULF2 POR MYO5A EEF1A1 TGFBR2 LOX NOX4 PPARG KIT PLCB1 XIAP PIK3C2A FLRT2 UCP2 MSN PDGFRA LEPR SIK2 CD109 SORT1 CD44 AACS SH2B2 ANXA1 SFRP2 COMP CTNNA1 NRIP1 GPC3 RAB8B ADCY3 ABHD2 SLIT3 POSTN PDGFC SFRP5 AKT1 IQGAP1 GNG2 GDF10 RARRES2 CTSH CHRDL1 FZD1 CLDN1 NEDD4 IGF1 ACACA ESR1 GREM2 PRKCI CTSB ASNS CHST11 APP CAV1 ADAMTS12 NTRK2 TNC HSP90B1 NBL1 GNB1 LYN PTPRA ITGA4 PTBP1 MYO1C RAB3…
ESTABLISHMENT_OF_CELL_POLARITY	0.00775194	0.0378023	0.382372	1.50092	4	124	62	MSN FRMD4B FRMD4A PRKCI UST CYTH3 PTK7 WWC1 UBXN2B RAP1B CFL1 DOCK7 GSN PARD3B GPSM2 MYO9A DOCK2 WEE1 PTK2B DOCK8 RAB11FIP2 OPHN1 CAMSAP3 FERMT1 RHOA FGF10 ROCK1 KIF20B MPP7 MYH9 MCPH1 SLC9A3R1 PRKCZ GATA3 ARF6 HSP90AA1 MAP1B CCL19 SPDL1 RUFY3 NDC80 SIPA1L3 ARHGEF11 CDK5RAP2 SH3BP1 AMOTL2 MARK1 MAP2 FOXJ1 HTT WNT7A WNT5A KIF26B WDPCP BRSK1 DCTN1 KANK1 FSCN1 SPRY1 CDH5 CCR7 JAM3
REGULATION_OF_TRANS_SYNAPTIC_SIGNALING	0.00143266	0.0135741	0.382335	1.6939	0	389	151	MME APOE KIT PLCB1 CDH11 SLC1A3 MCTP1 BCHE PLAT APP NTRK2 TYROBP PTPRA SRGN F2R APBA1 FYN RAP1B CDH1 PRKCB OXTR PRKAR2B ADIPOQ LGMN CPLX2 EGFR CYFIP1 FABP5 GNAI2 CLSTN1 RETN ADORA2B PSEN1 CX3CL1 LRRK2 ABAT SLC6A4 RELN SLC7A11 STXBP1 CD38 EPHB2 CASK MCTP2 FAM107A PTK2B PLCB4 RAB8A CLSTN3 PCDH17 CREB1 KMO SHANK2 IQSEC2 S1PR2 EDN1 DBN1 BCR CALB1 JAK2 OPHN1 STAT3 RGS14 PTN NTNG1 SIPA1L1 TUBB2B AKAP12…
NEGATIVE_REGULATION_OF_NEURON_APOPTOTIC_PROCESS	0.00626959	0.0322888	0.381463	1.50218	3	131	53	AXL APOE PRKCI NTRK2 GRN CHL1 F2R FYN LGMN BHLHB9 PPT1 PSEN1 CX3CL1 GCLC STXBP1 ADAM8 MDK ARRB1 PTK2B NONO JAK2 ERBB3 GDF5 BCL2 C5AR1 RHOA HIF1A ROCK1 BRAF HMOX1 PPARGC1A TYRO3 CCL2 KRAS NR4A3 CORO1A BCL2L1 KDM2B NDNF GDNF NR4A2 CITED1 TOX3 CX3CR1 HIPK2 GRIK2 LRP1 CNTFR FOXQ1 ADORA2A ARRB2 STAMBP TFAP2B
REGULATION_OF_DENDRITE_DEVELOPMENT	0.00933126	0.0431813	0.381159	1.49832	5	128	47	APOE IQGAP1 CAMSAP2 NEDD4 ASAP1 LPAR1 CAMK1D PTPRD ADAM10 CFL1 SDC2 PREX1 CAPRIN1 BHLHB9 CYFIP1 PSEN1 LRRK2 RELN SHANK2 DBN1 PAK3 BCL11A SIPA1L1 RHOA PPP1R9A ZMYND8 NGEF DLG5 FMR1 HECW2 BMP7 FBXW8 RAP2A ABI2 PTEN BMP5 MAPK6 PACSIN1 ARF6 EPHA4 CUL7 CDC20 ITPKA LRP8 ACTR2 SS18L1 CAPRIN2
DIVALENT_INORGANIC_CATION_HOMEOSTASIS	0.00144509	0.0135741	0.380846	1.69485	0	425	178	CXCL9 APOE MYO5A PLCB1 PDGFRA RASA3 KCNK3 SLC24A3 ESR1 CCR1 CCR5 APP CAV1 CCL8 PLCE1 LPAR1 HSP90B1 GNB1 LYN ADCYAP1R1 ATP13A3 F2R FYN P2RX4 PIK3CG C3AR1 ANXA5 PRKCB PKD2 OXTR SWAP70 PLCG2 PTGER3 TGFB1 TGM2 SRI GNA13 ANXA2 PTGFR EGFR SLC11A1 F2RL1 CYSLTR1 ATP2B4 P2RX7 SLC30A7 SNX10 VDR SLC39A6 PSEN1 PTPRC ADM CX3CL1 AVPR1A C1QTNF1 SLC39A8 S1PR1 PTPN6 CNNM2 CD38 HEXB PLCB3 TRPV4 EDNRA PTK2B THY1 SL…
CIRCULATORY_SYSTEM_DEVELOPMENT	0.001287	0.0135741	0.380811	1.7857	0	951	382	CLIC4 CYBB DCN TGFBI SFRP1 APOE DSP TGFBR2 LOX NOX4 PPARG C3 KIT RHOJ PIK3C2A FLRT2 PDGFRA LEPR PTGIS SGPL1 PARVA SH3PXD2B FAM129B HEG1 ANXA1 SFRP2 COMP CYP1B1 GPC3 SLIT3 AKT1 ANTXR1 BICC1 RGS2 GPNMB CTSH FZD1 NEDD4 IGF1 LUZP1 C1GALT1 RECK SEMA4A CXADR PRKX CAV1 ENPEP TNFRSF1B PLCE1 C6 RIPK1 NTRK2 TNFRSF1A GRN PECAM1 PAM MMP14 PDE3B VAV2 ENPP2 THBS4 CMA1 SULF1 THBS2 SPRED1 PIK3CG PTK7 SERPINF1 AN…
ANION_TRANSMEMBRANE_TRANSPORT	0.00150602	0.0135741	0.380364	1.60883	0	245	69	CLIC4 GABRA3 SLC25A10 EMB SLC16A7 SLC1A3 AKT1 CLIC1 RGS2 ARL6IP1 ACACA LRRC8D SLC25A1 RIPK1 SLC36A4 CPT1A STK39 CLCA2 SLC38A1 PTAFR SLC43A2 CLCN5 FOLR2 SLC36A2 ABCA1 LRRC8B ABCC1 THBS1 SLC35A3 SLC7A1 OSR1 STRA6 PSEN1 SLC13A4 CLDN4 SLC25A32 SLC37A2 LRRC8C SLC7A11 SLC7A10 PDPN SLC3A2 SLC7A5 SLC25A30 SLC35B4 TTYH3 CLIC6 ANO6 THRSP IRS2 CLCA1 ANO1 SLC1A4 SLC46A1 SLC43A1 FXYD3 GLRB LRRC8E SLC26A2 ADAM…
REGULATION_OF_CYTOSOLIC_CALCIUM_ION_CONCENTRATION	0.00147275	0.0135741	0.380043	1.64667	0	302	124	CXCL9 MYO5A PLCB1 PDGFRA RASA3 KCNK3 ESR1 CCR1 CCR5 CAV1 PLCE1 LPAR1 GNB1 LYN ADCYAP1R1 F2R FYN P2RX4 PIK3CG C3AR1 PKD2 OXTR SWAP70 PLCG2 PTGER3 TGFB1 TGM2 SRI GNA13 ANXA2 PTGFR F2RL1 CYSLTR1 ATP2B4 P2RX7 PTPRC ADM CX3CL1 AVPR1A C1QTNF1 S1PR1 PTPN6 CD38 PLCB3 TRPV4 EDNRA PTK2B THY1 KNG1 EDN1 PTGER2 CD52 EDNRB LPAR3 P2RY10 CALB1 JAK2 CYBA CXCR5 LRP6 BCL2 GPR65 ATP2B2 CD36 C5AR1 CD4 SLC8A3 UBASH3B …
RESPONSE_TO_ORGANOPHOSPHORUS	0.00933126	0.0431813	0.379939	1.49696	5	130	45	NOX4 APP LPAR1 HSP90B1 CDO1 PTAFR P2RX4 PIK3CG RAP1B EZR PKD2 PENK ADIPOQ MMP19 PCK1 P2RX7 WT1 AHR SLC6A4 HCN4 JUNB DUOX2 PTK2B SDC1 STAT1 KCNQ1 STC1 ZFP36L1 P2RY12 TYMS SELL IGFBP5 BRAF SLC8A3 PDE3A CPS1 FOSB AREG TEK THBD ITPR2 TAF1 PTEN RELA CITED1
RESPONSE_TO_DRUG	0.00131579	0.0135741	0.379662	1.77284	0	870	277	CYBB SFRP1 AXL POR TIMP2 TGFBR2 LOX PPARG PLCB1 GAS6 CCND1 SLC25A10 TCN2 CLDN3 B2M AACS ANXA1 SFRP2 CTNNA1 CYP1B1 ADCY3 ABHD2 SLIT3 SLC1A3 RGS2 NCKAP1L KCNK3 ARL6IP1 ATP8B1 FZD1 EPS8 CLDN1 BCHE ASNS MET CAV1 SLC25A1 RIPK1 TNC SLC36A4 HSP90B1 CPT1A GNB1 LYN ADCYAP1R1 SLC25A24 PAM STK39 MAP3K5 CDO1 FYN PTAFR P2RX4 SERPINF1 SMPD3 APOD ACER2 ADAM10 RAP1B FOLR2 SFXN1 SLC36A2 CDH1 PENK OXTR PRKAR2B VIM…
REGULATION_OF_NERVOUS_SYSTEM_DEVELOPMENT	0.00131926	0.0135741	0.379391	1.76413	0	815	294	MME MAN2A1 SFRP1 APOE TIMP2 NEGR1 ARSB PPARG KIT FLRT2 DENND5A MAP4K4 B2M IL6ST SFRP2 CTNNA1 SEMA3D AKT1 IQGAP1 RGS2 PTPN9 DPYSL3 CAMSAP2 FZD1 NEDD4 PRKCI SEMA4A APP TNFRSF1B ASAP1 PTPRF LPAR1 CAMK1D ARHGDIA NTRK2 GRN NBL1 UST LYN C1QA SEMA3F PTPRD FYN THBS2 IGSF10 P2RX4 PTK7 SERPINF1 SEMA3A ADAM10 CFL1 NTN1 GAK OXTR ZEB2 VIM SMO TCF12 TGFB1 SDC2 PLXNA4 PREX1 DOCK7 DTX1 PBX1 MMD SEMA5A EIF2AK3 ES…
CELLULAR_RESPONSE_TO_ORGANIC_CYCLIC_COMPOUND	0.00139082	0.0135741	0.379183	1.7128	0	491	169	SFRP1 NOX4 PPARG MSN ITGA6 AACS ANXA1 CTNNA1 NRIP1 CYP1B1 ADCY3 ABHD2 AKT1 COLEC12 GNG2 NEDD4 ESR1 APP CAV1 TNC HSP90B1 GNB1 DAB2 PTAFR P2RX4 PIK3CG SERPINF1 DHX9 RAP1B FOLR2 CDH1 EZR PKD2 PENK RNF4 ABCA1 SMO NCOA4 ADTRP TGFB1 ADIPOQ XRN1 ATP1A3 EGFR CASP8 PCK1 ATP2B4 P2RX7 VDR CEBPA ZFP36L2 IFIH1 RB1 WT1 TMEM173 AHR DDX58 MSR1 LRRK2 TFPI SLC6A4 TLR3 CCNA2 PGR GCLC HCN4 EGR1 PAK2 EPHX1 CASP3 EIF4…
CELL_RECOGNITION	0.00778816	0.0379537	0.379011	1.4745	4	119	41	MSN EMB COLEC12 APP PECAM1 CD9 SEMA3A FOLR2 CLEC7A SEMA5A LGALS3 VCAN DOCK2 EPHB2 CASP3 ROBO1 DOCK8 HVCN1 NRCAM PRF1 CD36 EFNB3 EPHA3 OVGP1 HAVCR2 CD6 CD5 CD226 CNR1 TUB IGSF9 NTM GAP43 PALLD MFGE8 EPHA4 CRTAC1 CSGALNACT1 CNTN2 CCL19 OPCML
PALLIUM_DEVELOPMENT	0.00154321	0.0135741	0.378182	1.52002	0	152	54	PLCB1 LAMB1 NTRK2 TACC1 SEMA3A ZEB2 SMO GNG12 EGFR ATP2B4 XRN2 PSEN1 UBA6 RELN MFSD2A CASP3 MDK GLI3 ROBO1 P2RY12 EMX2 SRGAP2 DIXDC1 NRP2 FLNA LRP6 PHLPP2 SLIT2 BBS2 RHOA FOXP2 PAX5 HIF1A KCNA1 HDAC1 CDON LHX6 EOMES MBOAT7 SLC2A1 NR4A3 DAB1 MCPH1 TMEM108 CEP120 PTEN ID4 SRD5A1 CDH2 LRP8 ASPM PROX1 CDK6 LRP1
[truncated: 568 more rows]

## Sheet: E_aging_genes
E-aging genes	mean_young	mean_24m	mean_28m	padj_2m/24m	padj_24m/28m
0610031J06Rik	216.686	158.652	177.27	0.00044228	0.358094
1110059M19Rik	1.00085	8.96121	8.54964	3.29192e-05	0.980529
[truncated: 1,029 more rows]

## Sheet: E_aging_GO
*** Decreasing E-aging genes
[truncated: 38 more rows]

## Sheet: L_aging_genes
L-aging genes	mean_young	mean_24m	mean_28m	padj_2m/24m	padj_24m/28m
[truncated: 276 more rows]

[truncated: 4 more sheets: L_aging_GO, upturn_downturn_genes, upturn_genes_GO_BP, downturn_genes_GO_BP]
